# Supplementary material for: An Alternative Splicing Program for Mouse Craniofacial Development
Source: Front Physiol. 2020 Sep 4;11:1099. doi: 10.3389/fphys.2020.01099 (PMC7498679; doi:10.3389/fphys.2020.01099)
Supplement: Supplementary file 1 [file Table_1.xlsx]

## Sheet: Table S1 Gene expression during
Gene	Common_name	E10.5_FNP_ecto_1	E10.5_FNP_ecto_2	E10.5_FNP_ecto_3	E10.5_MxP_ecto_1	E10.5_MxP_ecto_2	E10.5_MxP_ecto_3	E10.5_MdP_ecto_1	E10.5_MdP_ecto_2	E10.5_MdP_ecto_3	E11.5_FNP_ecto_1	E11.5_FNP_ecto_2	E11.5_FNP_ecto_3	E11.5_MxP_ecto_1	E11.5_MxP_ecto_2	E11.5_MxP_ecto_3	E11.5_MdP_ecto_1	E11.5_MdP_ecto_2	E11.5_MdP_ecto_3	E12.5_FNP_ecto_1	E12.5_FNP_ecto_2	E12.5_FNP_ecto_3	E12.5_MxP_ecto_1	E12.5_MxP_ecto_2	E12.5_MxP_ecto_3	E12.5_MdP_ecto_1	E12.5_MdP_ecto_2	E12.5_MdP_ecto_3	E10.5_FNP_mesen_1	E10.5_FNP_mesen_2	E10.5_FNP_mesen_3	E10.5_MxP_mesen_1	E10.5_MxP_mesen_2	E10.5_MxP_mesen_3	E10.5_MdP_mesen_1	E10.5_MdP_mesen_2	E10.5_MdP_mesen_3	E11.5_FNP_mesen_1	E11.5_FNP_mesen_2	E11.5_FNP_mesen_3	E11.5_MxP_mesen_1	E11.5_MxP_mesen_2	E11.5_MxP_mesen_3	E11.5_MdP_mesen_1	E11.5_MdP_mesen_2	E11.5_MdP_mesen_3	E11.5_Nasal_epi_1	E11.5_Nasal_epi_2	E11.5_Nasal_epi_3
ENSMUSG00000000001	Gnai3	135.837	143.609	141.732	131.638	140.865	128.615	132.911	134.637	151.691	158.916	153.908	153.009	157.898	157.319	160.042	156.564	153.225	168.029	135.549	130.045	125.39	136.783	130.744	130.989	142.862	150.768	129.071	150.967	133.812	160.976	142.372	154.335	162.702	144.286	148.945	146.684	181.834	163.909	162.913	182.43	176.753	172.71	165.4	156.555	159.961	151.16	148.28	146.446
ENSMUSG00000000003	Pbsn	0	0	0	0	0	0	0	0	0	0	0	0	0	0	0	0	0	0	0	0	0	0	0	0	0	0	0	0	0	0	0	0	0	0	0	0	0	0	0	0	0	0	0	0	0	0	0	0
ENSMUSG00000000028	Cdc45	47.079	48.2373	43.8843	41.9687	43.8151	40.5681	47.5284	45.8596	45.8145	35.9936	34.4742	34.7953	36.5136	35.9785	37.3052	36.091	35.0397	33.3223	33.5704	33.8107	34.7459	37.7936	37.0815	37.1009	34.8427	35.4422	32.1158	63.7285	57.0877	67.9079	69.3604	66.4655	67.9848	61.5282	71.0511	63.0141	47.1021	49.3111	44.6617	46.5117	49.3289	50.71	44.7301	46.2261	45.2613	40.0453	38.2065	36.7309
ENSMUSG00000000031	H19	1678.12	1554.83	1596.01	6180.45	5979.86	6843.68	8123.32	8484.63	NA	5800.53	5653.14	5934.03	4266.85	4118.89	4356.23	6133.35	5731.85	5503.37	5481.77	5594.39	5493.05	5781.83	6151.85	5625	5430.2	6052.58	5511.36	1679.68	1962.56	1618.26	1589.33	1479.92	1584.05	6416.89	5849.73	5969.19	1518.93	1459.03	1242.32	1669.4	1473.6	1346.25	6668.48	6378.04	6068.23	1896.46	1764.44	1732.57
ENSMUSG00000000037	Scml2	2.75438	4.06369	3.942	3.27068	3.06749	3.11217	2.41085	3.50183	4.65065	4.63584	4.12576	4.45332	3.19188	5.13716	3.66155	4.06255	3.03626	4.88656	3.53367	4.51018	4.07787	5.0122	4.55648	3.55825	5.19151	4.04806	5.94246	2.79357	1.79338	4.59289	3.57296	6.00678	4.44392	4.01884	5.69763	5.22418	6.198	6.30996	3.98406	7.09491	5.98997	5.19636	5.11467	4.56443	6.80795	3.62419	3.32417	2.6614
ENSMUSG00000000049	Apoh	0	0	0	0	0	0	0	0	0	0	0	0	0	0	0	0	0	0	0	0	0.0215814	0.0469815	0.117511	0.0494066	0	0	0	0	0	0	0	0	0	0	0	0	0.266836	0.125431	0.0934032	0.0508852	0.0952563	0.0753386	0.0238477	0	0	0	0	0.0210285
ENSMUSG00000000056	Narf	37.4822	35.2779	37.5627	36.6117	35.7803	38.7938	34.0924	32.008	32.7617	43.3869	43.1666	43.3813	44.294	41.9354	39.9354	43.3839	46.1131	39.9243	36.5537	37.1429	33.1244	35.9369	34.8313	35.7397	34.6951	39.3073	38.0324	29.5775	24.5347	30.469	30.2318	31.0185	31.8359	30.9294	30.0337	30.9091	45.9163	46.6575	41.0563	46.8602	44.7042	47.4821	40.4883	37.5647	40.3742	48.0081	49.1526	43.7786
ENSMUSG00000000058	Cav2	1.31498	1.43892	1.24328	6.36177	5.72903	7.12647	4.94242	5.06055	5.65651	9.10864	7.14755	7.87133	9.35388	9.4021	8.13258	10.6802	11.3309	9.851	11.7342	12.2941	10.7231	10.8321	12.0448	10.325	11.2663	11.7877	10.2453	3.35521	2.632	3.86894	2.47741	4.29504	3.07083	1.91697	2.68227	3.49647	5.92718	4.46044	3.45691	4.76223	4.10679	4.09209	3.7739	3.45631	3.56508	1.38296	1.4928	0.968052
ENSMUSG00000000078	Klf6	15.0773	15.3539	14.5577	21.2589	19.0608	16.7361	18.9911	20.4917	22.2249	32.571	36.6419	31.6933	18.861	19.3217	18.739	23.6057	23.5285	22.8435	23.7353	21.4236	18.8624	23.3358	25.2098	20.3469	22.4311	29.0607	21.0512	13.3538	10.7393	13.5999	15.7165	14.2565	15.7256	12.5462	14.1009	13.1176	19.3729	17.5141	14.6262	23.7103	22.4522	21.3756	17.1934	14.8277	14.6967	15.363	14.9299	13.0787
ENSMUSG00000000085	Scmh1	30.2252	30.4062	30.1941	34.3595	31.3393	35.8032	35.2766	30.2852	29.077	36.9736	36.8041	39.1782	33.4983	32.1653	36.7891	33.6674	30.8319	29.1858	35.4164	30.5438	36.7003	31.7715	31.1804	29.7612	31.6619	29.1282	34.9832	24.4175	30.7016	27.1606	26.1844	22.701	25.5559	26.7727	25.0606	24.2061	31.2815	30.078	27.0886	28.1889	27.2358	27.2391	30.1973	24.2696	26.6583	28.8498	26.6325	30.2411
ENSMUSG00000000088	Cox5a	271.328	236.012	233.324	202.095	205.802	178.229	224.816	202.14	246.516	269.126	306.031	324.896	309.244	325.484	325.773	280.357	325.401	319.477	181.704	253.904	144.262	203.226	157.833	210.801	219.975	180.068	233.799	238.211	390.185	283.56	251.575	278.842	288.653	262.834	237.86	263.594	286.271	310.351	300.117	329.574	316.256	367.419	308.987	287.09	325.863	324.069	328.763	318.124
ENSMUSG00000000093	Tbx2	7.23366	6.7265	7.26271	1.33669	1.70375	3.1853	2.43418	1.8515	2.23202	0.924165	0.782491	0.791872	1.17365	1.5002	1.29939	1.5513	6.95698	4.81084	0.806309	1.93353	1.05033	1.307	0.449499	0.596815	0.564109	0.326912	0.383779	148.377	135.073	140.477	183.51	171.834	164.543	97.1551	97.6537	88.0458	166.746	191.05	175.19	296.598	315.174	324.996	107.23	101.822	128.121	5.37988	9.15378	4.76631
ENSMUSG00000000094	Tbx4	0.0306003	0.0424363	0.0394101	0	0.0179755	0	0	0.0181599	0.00909872	0	0.0192222	0.019265	0.0156538	0.0190936	0	0.0435461	0.0859774	0.00981499	0.0512151	0.102322	0.0473311	0.00860776	0.0168752	0.00901531	0.0361025	0.00861278	0.00990133	1.27247	0.986845	0.980233	1.35858	1.26584	0.91378	3.00647	2.41166	2.40847	3.22627	3.15512	2.42529	2.09581	1.65744	1.96957	9.1939	6.90971	8.18785	0.0596561	0.101723	0.053644
ENSMUSG00000000103	Zfy2	0	0	0	0	0	0	0	0	0	0	0	0	0	0	0	0	0	0	0	0	0	0	0	0	0	0	0	0	0	0	0	0	0	0	0	0	0	0	0	0	0	0	0	0	0	0	0	0
ENSMUSG00000000120	Ngfr	1.78721	1.63563	1.76141	5.45605	5.915	5.70095	3.10994	2.17888	1.77136	0.893381	0.82364	1.09451	1.94245	2.26867	2.43462	2.84609	2.54295	2.34785	0.711422	0.742805	0.774428	1.0683	1.36093	0.553176	0.140898	0.719115	0.270249	17.7781	13.4411	15.7908	45.1068	37.7089	32.8817	5.76047	6.02812	4.92433	8.9518	9.16053	8.70796	32.7237	29.7962	26.5784	11.7029	9.5272	7.54514	1.64163	2.00821	1.13275
ENSMUSG00000000125	Wnt3	10.926	10.3021	10.3414	34.776	34.4388	39.7098	37.0656	35.3781	31.38	124.827	119.43	123.326	116.869	118.03	110.728	80.0039	80.5975	77.1009	127.245	126.893	133.118	97.1017	98.2157	103.39	97.2116	110.722	109.275	0.0180347	0.0637594	0.0367012	0.11962	0.173534	0.00885431	0.0188733	0.0554166	0.0163779	0.0503784	0.0434951	0.0243941	0.0264588	0.0745495	0.0349992	0.0165827	0	0.0569223	3.09947	3.19865	3.6845
ENSMUSG00000000126	Wnt9a	3.55106	2.89335	3.63799	4.58392	5.15904	5.23146	7.44671	6.9459	6.02275	8.8757	8.9698	10.1659	7.48541	6.87142	6.88552	6.80805	7.37236	6.85833	8.31329	7.92441	7.30314	8.79127	8.88175	10.0603	3.58476	4.00089	4.59932	0.573983	0.327927	0.846683	0.364386	0.305758	0.187796	0.444046	0.374675	0.385258	2.23861	1.94236	1.63583	2.56312	2.06362	1.65479	4.81232	3.55878	3.46767	2.39973	2.98614	2.94573
ENSMUSG00000000127	Fer	14.228	15.9808	14.9267	15.4864	16.5628	17.0424	16.7102	16.6196	19.4324	15.9757	14.7712	15.9964	16.0327	15.3567	14.8907	16.0047	15.4143	14.2625	16.5729	15.0824	14.3527	18.1395	17.1916	15.9112	16.43	18.0966	15.7932	18.1341	14.3008	19.952	20.0505	18.999	18.8438	17.9945	19.7749	17.5307	18.1074	16.6339	14.378	17.3897	15.4903	15.5838	15.0504	13.3218	14.0755	15.2485	13.665	12.0719
ENSMUSG00000000131	Xpo6	79.6501	76.7376	70.7838	73.953	71.1129	82.9597	85.8383	77.1925	64.8821	66.2412	64.9839	65.5685	68.189	68.029	71.3391	67.4004	64.2237	61.113	63.3374	69.5825	70.2253	69.1423	66.6479	68.6135	68.5293	61.8235	73.0984	74.083	107.081	69.1522	90.1117	72.4163	70.9235	74.0485	74.8487	71.4129	67.6135	72.1987	62.1352	71.4932	74.4833	64.3469	72.4659	66.8207	71.5026	58.5187	62.5322	66.3745
ENSMUSG00000000134	Tfe3	35.4974	34.8676	34.4694	32.2261	32.5719	34.3144	29.2675	30.2111	28.1537	29.6455	28.64	32.1465	30.716	31.0875	31.2391	29.6513	28.2078	29.3615	35.8427	33.019	33.9023	37.5064	35.2177	32.263	32.2245	31.3663	32.6802	29.2661	25.1823	30.4766	27.2526	28.8399	26.856	30.9562	29.0504	25.5127	29.4591	31.4497	24.7607	28.8952	30.2519	29.3595	27.5166	27.6079	27.0828	29.9538	30.3311	31.456
ENSMUSG00000000142	Axin2	47.6918	44.0986	46.7776	53.364	54.7442	58.0026	45.6564	43.2179	38.5382	52.5689	47.9931	49.0223	58.0297	57.4491	54.7599	44.6973	48.0615	46.7641	48.6616	57.3481	51.9384	47.3092	55.9892	48.5313	34.9336	47.6138	42.8441	37.4303	23.1865	34.2476	70.7829	60.5337	54.2524	57.4299	63.1912	53.44	68.4459	65.6385	61.7012	100.437	110.675	113.917	74.8289	66.8515	77.753	28.49	27.7461	27.0721
ENSMUSG00000000148	Brat1	11.0028	10.5368	10.3363	9.97175	10.9217	11.6545	12.9372	11.4653	9.51009	11.9033	11.154	13.0539	12.5782	12.4678	11.9824	13.3335	12.5351	12.5234	10.6449	11.9098	11.6133	11.3223	11.3579	11.8697	12.1932	11.8474	12.4708	9.33359	7.80199	8.97079	9.61532	9.24633	9.66131	11.246	9.46403	10.4397	11.6334	12.8852	10.4919	13.2602	11.9845	12.9514	12.818	10.7985	12.1084	12.5941	12.4805	12.0807
ENSMUSG00000000149	Gna12	75.8693	71.5185	76.0581	67.5217	67.2881	72.654	77.962	69.6718	60.8664	78.1062	73.9051	76.6896	87.8807	84.1659	81.1377	83.148	79.4563	74.9802	84.6732	82.4567	79.0629	83.3428	82.073	80.8201	74.7583	72.8058	72.1893	68.4837	50.2664	69.6725	67.6709	62.6199	56.7014	59.8526	54.818	56.5494	79.6229	84.7006	76.9854	82.4185	78.2605	79.8472	72.8603	72.5998	70.6114	92.6427	91.4451	90.1166
ENSMUSG00000000154	Slc22a18	1.86418	2.14228	1.48149	1.30462	0.980747	1.30452	0.96587	0.837203	0.979551	1.86036	1.77506	1.77316	1.65379	1.91115	1.55696	1.91281	1.82311	1.67239	2.56602	2.47583	3.21954	2.26205	3.01455	2.22153	2.55429	2.43657	2.70558	0.0768581	0	1.38658	0.0503105	0.386492	0.113989	0.0456364	0.173402	0.398113	0.490406	0.488711	0.307513	0.380226	0.46409	0.376262	0.660966	0.334131	0.283547	5.68196	4.67394	4.18932
ENSMUSG00000000157	Itgb2l	0.0643881	0.0541412	0	0	0	0	0	0	0	0	0	0	0	0	0	0	0	0	0	0	0	0	0	0	0	0	0	0	0	0	0	0	0	0	0	0	0.0200305	0.0592923	0	0.0591606	0.00983211	0	0.00965416	0.0108231	0	0.028762	0	0.0179073
ENSMUSG00000000159	Igsf5	0.0398511	1.07653e-08	4.31609e-08	0	0.0181835	0.0331121	0	0	0.0184048	0.0176578	0	9.12162e-07	0	0	0	0	0	7.05722e-07	0.102119	0.0166208	0.0477046	0	2.01279e-08	0	1.33728e-08	3.81798e-07	3.17728e-09	0.156408	0.243479	0.0792395	0.351819	0.436244	0.384245	0.590437	0.0342616	0.0172902	0.0904709	0.151101	0.0564034	0.076652	0.0431126	0.072589	1.32581e-08	8.16221e-09	2.42879e-09	0.0172692	0.0572291	0.0278789
ENSMUSG00000000167	Pih1d2	7.00824	6.20888	5.8936	7.71192	7.03902	5.86055	6.87036	6.40205	6.10643	4.66304	4.04716	4.64696	4.13167	5.60427	4.58838	5.40301	4.75587	5.23712	4.51065	4.29566	4.46497	5.01035	4.35836	4.01383	6.1743	4.24529	4.71386	5.59084	4.98822	5.81104	2.11165	5.07872	5.04469	3.14799	3.83308	3.90498	2.54831	3.50542	2.78799	2.62083	2.84422	3.12507	2.84639	3.38241	3.754	5.51462	5.75779	4.95285
ENSMUSG00000000168	Dlat	49.9285	47.2357	50.7298	48.4259	47.0128	42.7617	47.5719	48.7662	54.3857	56.8412	52.6128	57.6722	53.5197	54.8175	57.1022	59.6636	52.512	59.044	50.2731	50.1335	54.6872	53.8168	51.7452	50.4025	56.7642	60.8031	49.7676	54.2058	50.881	60.7114	49.69	60.741	60.1362	57.8675	60.2892	58.2738	47.2762	51.3739	51.5709	54.3764	48.6363	51.6818	49.9474	50.6939	50.9719	54.6138	52.5212	50.1679
ENSMUSG00000000171	Sdhd	173.365	161.4	174.902	132.676	140.52	125.075	166.288	148.946	154.592	134.612	133.41	139.528	145.9	141.35	148.531	144.57	136.782	150.468	120.62	124.249	112.452	140.936	139.131	137.254	140.024	137.976	127.47	167.876	215.128	173.679	178.888	185.039	196.551	194.684	178.964	186.678	173.871	189.404	177.258	192.335	180.516	205.288	188.976	189.219	194.763	183.701	182.054	178.36
ENSMUSG00000000182	Fgf23	0.0520034	0.0144472	0.0267745	0.0695517	0.0152905	0.0288035	0	0.0464802	0.0464365	0.0296529	0.0655629	0	0	0.0163002	0.0324013	0.0148428	0.0163101	0.0335152	0.0144575	0.0434026	0	0	0.0143035	0.030625	0.0623025	0	0.016801	0.159955	0	0.0162788	0.338436	0.40521	0.42569	0.536516	0.314157	0.348759	0.104494	0.154541	0.115365	0.203717	0.176363	0.20168	0.26485	0.260372	0.273416	0.0435408	0.0532945	0.0781156
ENSMUSG00000000183	Fgf6	0	0.0224661	0	0	0	0	0	0	0.0480669	0	0	0	0	0	0	0	0	0	0	0	0	0	0.02212	0	0	0	0	0	0	0	0	0.065066	0	0	0	0	0	0.0481522	0	0.0244177	0	0	0.0915649	0.0238368	0	0.0451627	0.0829045	0.100962
ENSMUSG00000000184	Ccnd2	133.121	147.956	149.328	471.345	465.652	472.414	484.277	537.721	500.72	516.988	511.218	470.534	568.14	585.664	568.661	532.758	530.25	466.807	485.08	456.809	454.806	416.799	418.005	397.55	318.234	354.044	333.7	197.494	113.162	194	199.23	205.258	192.975	156.182	149.486	150.517	200.305	192.523	173.312	181.942	198.4	166.619	177.31	173.486	166.337	131.667	130.283	117.939
ENSMUSG00000000194	Gpr107	26.7613	24.2643	23.1506	30.7498	31.1712	33.278	36.4534	36.444	34.4521	35.457	35.1374	32.2925	36.7006	39.4761	38.9609	40.8924	39.7871	36.7078	25.4703	25.3501	26.1032	23.5112	25.9286	25.3707	28.1451	27.8854	24.5552	18.1964	12.8554	18.737	15.5422	17.1094	22.2455	21.4179	19.9891	17.8145	25.3014	24.9015	21.8729	23.9061	23.0528	20.2533	25.4574	20.8771	19.5835	32.8381	31.0772	28.6082
ENSMUSG00000000197	Nalcn	1.23129	1.26104	1.5002	0.167177	0.134632	0.184711	0.134755	0.171855	0.184254	1.36073	1.421	1.37079	0.844495	0.669886	0.442199	1.07824	0.740829	0.718935	1.46127	1.22318	1.33135	1.65794	1.76003	1.55145	1.31314	1.73286	1.6728	0.0335033	0	0.0491163	0.0687643	0.0291063	0.0432831	0.0531892	0.0594848	0.0727239	0.0518701	0.0359624	0.0397121	0.0940342	0.0510354	0.0469826	0.0768181	0.104716	0.0725888	1.49534	1.55272	1.29078
ENSMUSG00000000202	Btbd17	16.676	11.8041	13.2597	0.309029	0.264732	0.626936	0.10562	0.155848	0.15525	0	0.117316	0.0333559	0.0544949	0.123566	0.047739	0.0149341	0.385662	0.0650165	0.0145916	0.0291256	0.0148688	0.0147629	0	0.0616907	0.0667986	0.0292522	0.060428	0.355691	0.698053	0.806697	0.538161	0.701513	0.105355	0	0.0653388	0.014952	0.0582913	0.0587782	0.114341	0.125863	0.133639	0.0326256	0.456259	0.362662	0.525017	23.3796	26.4785	23.5185
ENSMUSG00000000204	Slfn4	0	0.00669223	0	0	0	0	0	0	0	0	0	0	0	0	0.00747467	0	0	0	0	0	0	0	0	0	0.014521	0	0	0	0	0	0	0	0	0	0	0	0.00689626	0.00714599	0	0	0	0.00719093	0.00681284	0	0.00668599	0	0.00616974	0.00604622
ENSMUSG00000000214	Th	4.44431	3.91346	3.58572	14.0988	14.3262	15.9321	24.118	21.2877	18.3836	3.15331	3.25743	4.70787	1.91665	2.8537	2.66494	4.02891	5.36619	4.52201	0.250053	0.21744	0.202227	0.361962	0.26936	0.186946	0.071873	0.122204	0.226645	0.38153	0.310762	0.29193	1.24681	0.184185	0.0629621	0.133498	0.0663514	0.0975341	0.0219832	0.107291	0.0608744	0.022956	0.0215067	0.0227976	0.030949	0.0323314	0.0691873	1.10394	0.933531	0.795038
ENSMUSG00000000215	Ins2	0	0	0	0	0	0	0	0	0	0	0	0	0	0.0716354	0	0	0	0	0	0	0	0	0	0	0	0	0.0678218	0	0	0	0	0	0	0	0	0	0	0	0	0	0	0	0	0	0	0	0	0
ENSMUSG00000000216	Scnn1g	0.816963	0.620898	0.701399	3.24271	3.42182	4.18895	8.09688	8.43972	7.12811	5.3516	5.49314	5.9054	2.63148	3.4079	3.69559	3.22867	3.54139	2.62125	4.92008	4.1476	4.85098	3.64434	3.18665	3.17481	2.84515	2.73488	2.9187	0	0.00938174	0	0	0.0162525	0	0.0194459	0.0380764	0.016874	0.00865134	0	0	0	0	0	0.017085	0.00888957	0.00837714	0.160089	0.216607	0.204561
ENSMUSG00000000223	Drp2	0.7671	0.765591	0.655289	1.00164	1.00292	1.04255	0.93326	1.00015	0.815571	1.29893	1.14224	1.05785	2.05883	2.09204	1.69521	1.91305	1.87161	1.49237	2.42337	2.06311	2.11482	2.69085	2.37114	2.71048	1.70951	2.0239	2.12405	1.84042	0.816451	1.7205	1.23417	1.22465	1.44883	1.19036	1.26735	1.25694	6.23591	5.3569	4.5612	7.08408	6.30829	5.67063	4.83473	4.01053	4.06913	0.973186	0.911545	0.712179
ENSMUSG00000000244	Tspan32	0.0473231	0.0363919	0.0755742	0	0.0417797	0.0196608	0.0284644	0.0192243	0.0845673	0.0203133	0.144976	0.0621957	0.0182635	0.0822644	0.323362	0.0203137	0.02025	0.0438851	0	0.0715897	0.14459	0.0550005	0	0.104425	0.0396745	0.0771353	0	2.40448	3.72872	3.62831	2.39307	1.38495	2.85112	2.1569	1.32155	1.60195	3.77131	3.79767	3.04387	3.80296	3.50244	3.17389	4.08642	3.32635	3.39581	0.284969	0.195325	0.171081
ENSMUSG00000000247	Lhx2	88.434	76.3953	87.753	0.38833	0.348527	0.504645	0.140644	0.398913	0.255709	0.207179	0.167291	0.663696	0.430276	0.283124	0.276252	0.223277	0.252102	0.102626	11.128	11.9871	5.68413	47.9575	54.2848	50.833	0.740126	0.514656	9.89276	6.14726	6.56164	5.60604	10.8784	9.01398	7.55194	9.74816	8.18924	8.70956	0.641972	0.783243	1.13412	1.02613	0.451079	0.574876	1.76052	1.94849	2.4544	225.001	206.2	188.377
ENSMUSG00000000248	Clec2g	2.21176	0.38253	0.791886	1.61443	1.32745	1.35614	0.554025	0.711777	0.535051	1.36026	0.764604	1.35548	0.961889	0.753651	1.05079	0.800514	1.96135	0.299309	3.37689	1.93433	3.3337	1.4256	2.3614	1.96522	1.75759	2.85927	2.4757	0.705142	0	0	0	0	0	0.152143	0	0.387001	0	0.278833	0.123128	0	0	0.135351	0	0	0.121524	0.76596	0.93932	0.553106
ENSMUSG00000000253	Gmpr	12.4783	11.4366	10.2908	3.34106	3.19465	3.70034	3.35417	2.67959	2.69154	4.22005	3.5236	3.63659	3.98871	3.84542	4.05301	4.72048	4.15323	3.60363	5.91269	7.53595	5.99364	11.7113	11.6255	11.493	11.4235	10.6326	11.3896	16.9198	19.716	15.3179	11.7615	10.0439	10.8944	9.50263	10.2522	11.4708	14.868	15.6721	13.5185	14.5178	12.5103	14.8897	14.3983	12.9346	15.1241	23.1682	23.0263	19.9731
ENSMUSG00000000263	Glra1	0	0	0	0	0	0	0	0	0	0	0	0	0	0	0	0	0	0	0	0	0	0	0	0	0	0	0	0	0	0	0	0	0	0	0	0	0	0	0	0	0	0	0	0	0	0.0285016	0.0395575	0
ENSMUSG00000000266	Mid2	7.60369	7.15254	6.88649	9.61592	9.98938	9.31958	13.4016	15.0213	15.1287	19.7656	19.4725	18.2268	12.2008	12.1789	12.2873	15.5805	15.0479	12.7249	18.4617	16.6269	15.5283	16.9314	15.6259	14.4462	21.5651	19.3943	19.233	2.26565	1.49105	2.24555	3.26799	2.54333	2.92463	2.509	2.55439	2.89166	2.58675	2.0992	1.78954	3.77399	4.13921	3.40348	3.67118	3.30045	3.9209	5.80613	5.5555	4.96719
ENSMUSG00000000275	Trim25	6.12946	5.66568	5.47351	3.64985	3.84637	3.52686	3.34511	3.02347	2.80391	2.59197	2.51418	2.75382	3.01975	2.98963	3.08367	3.75255	3.88686	3.56288	2.44934	2.95115	2.67135	2.10467	1.88442	2.23815	3.29868	3.63363	3.5628	2.43898	1.95853	3.05516	1.87482	1.78665	1.711	1.40729	1.52281	2.02744	3.29738	3.47822	2.82387	2.7153	3.09737	2.435	3.1932	2.77782	2.43554	10.2484	9.59832	9.36111
ENSMUSG00000000276	Dgke	4.45495	4.59595	4.05436	4.3503	4.56555	4.09289	4.90229	4.84993	4.64826	4.96443	5.12699	5.42551	5.11635	5.36418	5.64759	5.43655	4.92666	5.84231	5.48926	5.08669	4.86563	4.77139	4.23374	4.58543	5.50196	4.86558	4.94389	3.71741	2.40624	3.79106	3.49118	3.4899	3.44228	3.11544	3.29068	2.67253	4.09904	3.757	4.28287	3.94412	3.23109	3.54879	3.97197	3.44408	3.635	5.41191	5.18795	5.37337
ENSMUSG00000000278	Scpep1	31.1888	31.7915	30.9608	27.7664	30.9533	29.0101	27.2712	25.5367	26.878	24.8617	23.0373	26.6779	25.2114	24.8392	26.6805	25.6234	24.1742	27.5057	20.3424	20.5423	22.6764	18.7367	19.0145	21.4151	20.0927	20.2868	21.5566	41.4179	42.797	44.1888	41.9213	41.9347	42.035	39.7753	42.2464	40.5426	54.8925	55.1396	49.9217	48.27	45.502	48.0878	43.6655	37.7922	42.0266	33.2473	32.3427	34.1124
ENSMUSG00000000282	Mnt	28.2046	29.0184	27.994	32.1301	32.4905	42.8099	34.2921	30.8562	20.6769	26.6218	25.494	32.6223	26.2024	29.228	28.8279	28.4681	28.0025	25.0204	33.1277	27.6384	26.8857	33.4256	31.8208	27.1013	25.1431	27.2872	25.1741	21.2407	10.1722	16.0731	25.4423	19.0008	16.4928	20.0875	19.7443	17.0271	18.9566	17.2478	17.4879	18.4638	18.0995	18.5623	18.726	15.5658	19.617	24.0111	23.9477	25.204
ENSMUSG00000000290	Itgb2	0.127036	0.0580318	0.0994186	0.375719	0.394011	0.492381	0.304403	0.321012	0.235765	0.0952077	0.142505	0.165359	0.126939	0.166545	0.19507	0.15885	0.166846	0.146938	0.116646	0.0874097	0.116717	0.0343187	0.0314933	0.101057	0.0530861	0.0588771	0.0739675	1.63272	0.615446	1.00518	3.76456	0.527499	1.34572	0.428829	0.475015	0.730797	1.3931	1.08142	0.649933	0.903885	0.728055	0.842323	0.840085	0.839442	0.616452	0.144321	0.179272	0.0916038
ENSMUSG00000000295	Hddc2	50.758	55.1235	53.4781	63.6381	69.7653	65.7091	74.1634	72.3766	77.8059	79.1677	71.4947	78.2341	86.6555	76.56	88.4204	77.6944	76.7285	74.9164	70.0103	74.1392	70.6607	74.9347	74.554	72.8344	79.6494	78.7109	69.5277	72.9122	110.615	81.9802	69.8101	76.8124	97.1445	80.8438	83.5893	76.7037	77.7519	87.2681	75.7592	94.9945	78.1884	95.694	76.0804	75.2966	82.9764	51.551	52.0117	52.5578
ENSMUSG00000000296	Tpd52l1	7.8299	6.32467	7.91825	16.5673	18.2293	15.9159	20.5454	18.5606	20.8538	13.4786	11.3443	12.9632	13.6972	12.4665	16.3658	12.3995	11.0604	13.652	11.8102	10.6369	12.0619	10.8541	10.5428	11.2713	9.04383	10.4276	9.12676	21.7824	27.6714	21.6181	14.3805	13.2465	13.8353	21.3847	20.3695	19.6246	24.4962	23.4851	22.9628	20.5614	17.1725	24.2244	20.8032	19.196	20.9514	3.99115	4.41889	3.85236
ENSMUSG00000000301	Pemt	5.56676	5.06446	6.54009	4.27468	4.75713	5.7936	6.75343	6.93242	5.56121	3.64307	3.43562	3.22089	3.70744	5.0792	3.70233	3.3833	3.96174	4.56612	2.67943	3.16344	4.70333	3.01628	3.04022	3.50801	4.11485	4.69815	4.31748	5.00976	10.3315	7.31515	9.6261	6.8028	7.37475	8.05977	7.30869	5.39614	4.50237	6.86892	6.20468	3.52404	4.29278	5.26537	4.69886	6.14026	5.82956	6.0518	5.56144	5.99174
ENSMUSG00000000303	Cdh1	104.213	105.13	96.8424	146.296	149.854	146.862	161.123	164.566	149.07	254.173	277.104	275.439	191.434	186.281	188.367	218.224	220.321	213.708	180.419	202.496	226.165	175.083	199.786	207.081	177.226	198.763	206.8	0.171571	0.0611167	0.344864	0.0979048	0.897898	0.132874	0.0439955	0.0708249	0.0446176	0.239914	0.24872	0.235297	0.128992	0.118478	0.0672125	0.115909	0.0646306	0.42693	111.407	109.484	106.531
ENSMUSG00000000305	Cdh4	5.29866	4.76043	4.51014	1.37191	1.6057	1.40063	2.70022	2.71924	1.71755	1.12129	1.14686	1.3744	1.30853	1.20316	1.13056	2.4616	2.77095	1.96283	0.915302	0.939967	1.18295	1.33693	1.60955	1.93548	1.13613	1.48472	1.3404	1.56506	0.844778	1.09495	2.60028	0.820864	0.906723	0.967112	1.49801	0.946612	4.26979	3.04672	2.62759	4.66651	3.98302	3.7834	4.52317	3.37508	2.95785	6.15186	5.70945	5.80911
ENSMUSG00000000308	Ckmt1	27.2618	25.0573	27.2864	2.57425	2.67202	2.82599	1.79091	2.70091	2.20597	1.85606	2.0653	1.92336	3.59808	2.92291	2.83232	1.86257	2.42274	1.82042	3.01177	3.85624	3.46642	6.42729	7.24125	7.30921	4.34018	5.16564	4.74882	1.63398	3.85031	1.07459	0.970993	0.582977	0.284154	3.17099	2.80432	3.13002	3.17569	2.84464	2.62675	6.06036	4.9189	4.53741	11.2412	7.90859	9.33853	108.546	99.9005	84.0519
ENSMUSG00000000317	Bcl6b	0.398674	0.339685	0.456422	0.294708	0.4959	0.281975	0.253026	0.314829	0.257242	0.228981	0.376168	0.240449	0.406129	0.306889	0.358855	0.323394	0.269426	0.251608	0.467248	0.472348	0.518275	0.419231	0.439411	0.462578	0.50166	0.290586	0.439957	6.67036	5.55259	6.07019	7.04483	5.99298	6.63856	4.31361	4.14296	4.82324	7.14094	6.38901	5.70406	7.40208	6.61575	6.06949	6.50861	5.47286	5.57596	0.623385	0.885441	0.371305
ENSMUSG00000000318	Clec10a	0	0	0.0171487	0	0.191489	0	0	0	0	0	0.105781	0.0450744	0	0	0	0	0	0	0	0.195913	0.189798	0	0.0182986	0.0407716	0	0	0	0	0.407848	0.139261	0	0.190989	0.931624	0	0	0.0456465	0.25239	0.204951	0.186291	0.0526006	0.0934524	0.0198964	0.350546	0.0826901	0.0921043	0.235424	0.0635472	0.0834238
ENSMUSG00000000320	Alox12	2.77597	2.55633	1.9601	12.4608	12.1953	11.8445	4.46125	4.71317	4.05888	8.64908	7.51992	6.41175	8.75469	9.60023	10.4344	7.43161	6.44687	5.70737	5.97138	7.33714	7.43398	5.87093	5.33856	5.90973	9.24235	10.3825	9.46861	2.02595	1.46132	2.07062	1.08475	1.15685	0.805978	0.755158	0.627866	0.782415	2.70136	2.74211	2.54503	2.66703	2.61882	2.39011	2.90581	2.34075	2.1606	5.2155	4.35682	4.18306
ENSMUSG00000000325	Arvcf	56.6185	49.9923	51.9508	53.0317	54.4653	56.0231	60.2406	59.7514	46.5729	52.9864	55.2945	58.0371	51.0662	54.6372	53.1124	57.1186	62.179	55.9553	43.6507	44.9038	45.675	41.0962	40.6732	42.9555	44.6582	39.0045	44.9998	37.382	33.4584	35.1086	25.1491	22.9261	19.6298	25.5321	26.0905	24.082	33.8139	38.5103	32.3506	30.2823	29.8409	29.8573	25.7347	24.7219	26.0561	51.9656	53.5589	53.7747
ENSMUSG00000000326	Comt	53.594	43.4572	47.3628	47.7543	43.5259	49.2309	61.8618	54.6287	42.5154	38.2337	34.6198	40.6222	32.1907	32.1344	33.2295	45.255	41.8079	39.431	35.4381	38.4061	38.9866	31.8278	33.2704	34.5196	34.9249	38.3787	41.3285	46.3335	40.18	42.6874	28.775	26.5847	24.9879	31.1602	27.9949	28.518	34.698	35.0286	32.5478	28.4419	24.0782	25.9591	26.6427	26.3632	25.9477	40.7043	40.7938	40.3812
ENSMUSG00000000339	Rtca	59.5649	62.0149	63.1462	46.2574	51.0554	50.103	58.2402	54.6936	55.4664	41.8291	43.0748	45.4203	45.9423	46.8785	47.5497	46.5733	47.9886	45.0525	38.0999	38.6521	32.2471	41.2954	35.3231	36.6675	40.5364	40.0346	38.0447	71.9306	84.4908	67.7	77.7497	72.6432	80.165	75.5943	75.1094	72.323	60.0557	61.0846	58.0195	63.0124	61.8329	61.27	62.4607	63.5252	62.8965	60.2283	59.7057	59.1812
ENSMUSG00000000340	Dbt	12.6307	12.5861	12.9106	15.6193	16.6771	15.465	15.6527	16.3948	17.7005	18.1793	17.1925	17.298	19.2788	17.4919	17.9288	19.0471	18.7411	18.7074	21.5424	20.1977	21.4162	21.695	22.3457	21.9447	19.486	22.3681	21.5762	12.2516	12.4001	13.259	15.0784	13.8635	14.9543	13.5648	14.8025	14.5654	12.2481	11.6154	9.79365	13.8578	13.5479	11.8805	13.8691	11.7701	13.0463	15.1158	15.0299	13.986
ENSMUSG00000000346	Dazap2	188.69	205.587	201.543	183.791	177.458	188.048	197.802	205.011	208.871	227.194	216.219	235.302	216.705	212.14	226.603	218.182	220.477	219.126	233.268	227.548	241.891	239.993	240.307	237.491	210.299	233.873	224.97	141.733	151.44	145.454	140.86	156.881	164.076	166.665	167.083	167.176	117.063	126.562	110.457	130.776	124.74	135.387	131.384	118.18	135.158	210.19	206.845	199.349
ENSMUSG00000000355	Mcts1	43.3687	42.6743	45.8697	43.2723	50.9421	47.1681	46.6275	44.8531	61.836	69.2368	59.9616	63.3459	73.0879	64.1905	70.949	74.2879	60.8098	72.58	70.478	64.6232	70.8203	76.1958	67.4545	67.618	73.6202	75.9939	71.923	34.1531	47.2665	37.8719	60.4409	64.0116	79.1365	53.4935	56.2929	60.3276	51.5493	52.291	45.9607	65.6836	57.097	61.8589	62.2481	52.5012	64.5824	58.2737	54.5061	54.1668
ENSMUSG00000000359	Rem1	0.15276	0.273425	0.663441	0.148626	0.12874	0.24898	0.0917626	0.0602149	0.0682166	0.177502	0.11158	0.217499	0.102972	0.0898806	0.107206	0.0576468	0.0899403	0.036958	0.118889	0.15443	0.0442208	0.128548	0.047242	0.763903	0.193616	0.482586	0.592151	0.334176	0.878692	0.0210576	0.116468	0.0153936	0.71996	0.277258	0.298752	0.272316	0.312734	0.46325	0.254261	0.528346	0.355879	0.478661	0.509749	0.53058	0.607401	0.799827	0.915424	0.750639
ENSMUSG00000000365	Rnf17	0.542464	0.49348	0.481077	0.813161	0.804608	0.863145	0.826792	0.791041	0.886237	0.994415	0.891292	0.742327	0.944676	0.634222	1.07478	0.724949	0.709003	0.783939	0.852124	0.788183	0.755658	0.994617	0.851317	1.06088	0.690857	0.61341	0.788308	1.1559	0.612569	1.20275	0.823831	1.01186	0.870096	0.955892	0.894308	0.853901	0.855103	0.612801	0.639686	0.605844	0.487397	0.581334	0.767964	0.527661	0.602506	0.404921	0.288694	0.347467
ENSMUSG00000000374	Trappc10	17.2052	17.5854	17.667	16.7728	16.7843	17.0127	19.4269	19.1096	17.7392	23.3169	21.672	21.8315	22.878	22.0958	21.0521	23.3665	21.5202	21.021	20.8004	20.8328	20.4595	20.2295	21.409	20.8154	19.4158	20.9269	19.2374	13.1863	8.15641	13.4271	10.903	12.2814	12.3508	13.0512	12.4537	11.8379	18.1803	16.7718	16.5146	17.0275	17.739	15.4105	18.5805	16.7332	16.5207	22.835	22.3924	21.8683
ENSMUSG00000000378	Ccm2	46.0619	41.4397	46.3283	41.0868	43.352	46.1863	58.2068	49.5551	42.1739	36.8299	33.4826	40.3159	37.5375	37.8121	35.0177	37.2114	35.6894	34.2172	27.8767	28.3062	23.4124	24.5793	25.8243	24.8837	23.8491	22.8441	24.2145	65.9795	64.3202	69.8442	73.1369	57.4898	63.7131	70.113	60.0139	55.2356	52.032	61.3113	53.3724	59.5115	57.3459	57.9079	61.5287	55.1397	60.4304	39.1078	36.1029	33.8036
ENSMUSG00000000381	Wap	0	0	0.0615182	0	0	0	0	0	0	0	0	0	0	0	0	0	0	0	0	0	0	0	0	0	0	0	0	0	0	0	0	0	0	0	0	0	0	0	0	0	0	0	0	0	0	0	0	0
ENSMUSG00000000384	Tbrg4	76.342	75.3497	75.4027	61.1422	59.9436	69.2874	79.4607	75.9322	62.4064	56.7038	58.128	64.8172	62.9984	65.1569	59.9081	67.2293	64.2522	63.6901	62.0758	61.4929	59.479	68.5095	66.0451	61.5212	68.4367	65.8931	62.953	86.5756	62.4881	76.4193	101.141	73.3619	68.5392	72.0955	70.231	72.5234	48.3162	50.6005	49.5542	51.4821	49.187	49.6685	50.9174	50.0546	50.2487	59.9235	60.3366	57.841
ENSMUSG00000000385	Tmprss2	1.54866	1.32957	0.976142	0.872059	0.908027	0.70863	1.92689	1.33914	1.79631	4.00643	3.3588	3.58394	3.1741	2.85119	2.38879	2.99798	2.56872	3.0057	3.63296	3.19617	3.24786	3.09132	3.22897	2.91992	2.12092	3.15235	2.71788	0	0	0.0440118	0	0.0225775	0	0	0	0	0.0161337	0.00838525	0.00841264	0.00843378	0	0	0.00778167	0.0261631	0.0153443	1.68415	1.46558	1.45837
ENSMUSG00000000386	Mx1	0.0897787	0.0495796	0.0769525	0.0668809	0.0861954	0.0267801	0.0256473	0.0285122	0.0383321	0.0281059	0.190661	0.161103	0.00830144	0.0296036	0.101142	0.0733894	0.0301497	0.07445	0.0626872	0.0958408	0.0664298	0.0654185	0.141206	0.0661147	0.105771	0.026903	0.0298096	0.0410885	0.266103	0	0.148652	0.067918	0	0.0419994	0.19035	0.0365036	0.325377	0.178873	0.153668	0.07704	0.0705203	0.115755	0.11549	0.0697059	0.067186	0.0793772	0.0677273	0.136789
ENSMUSG00000000392	Fap	0.300443	0.289334	0.679649	0.0936896	0.247947	0.062561	0.0593559	0.178141	0.3745	0.319235	0.369739	0.405985	0.26866	0.252485	0.17823	0.188823	0.152226	0.173183	0.194221	0.312967	0.260511	0.311336	0.452591	0.396477	0.335189	0.200151	0.502822	13.7381	13.2686	13.6776	4.5939	2.91321	5.55441	1.42241	1.1923	1.43287	15.2392	13.1305	12.0142	5.81188	4.86768	5.26201	3.58151	2.66923	3.01181	2.24335	2.17636	1.79632
ENSMUSG00000000394	Gcg	0.369264	0.483022	0.164061	0.205387	0.210833	0.271311	0	0	0	0.340896	0.277125	0.340536	0.254411	0.172001	0.198143	0.094665	0.0546927	0.0595828	0.0490283	0.098148	0	0.0497039	0.0968477	0.0520203	0.0536243	0.0246119	0.107193	0	0	0	0	0	0	0.058546	0.0593514	0	0	0	0	0	0	0	0	0	0	0.203488	0.186447	0.165473
ENSMUSG00000000399	Ndufa9	69.0302	74.9778	72.0493	65.1218	70.6643	62.2557	73.5133	70.2103	70.5205	84.6142	86.2264	91.9095	81.2813	84.9169	88.0659	85.6488	79.8425	91.4277	58.9683	62.9853	69.1887	65.6522	66.059	63.379	70.954	68.7137	63.4391	89.5377	105.97	92.4415	80.203	90.6402	96.4149	90.0727	97.4512	90.1538	93.0937	98.3479	90.5105	99.1655	99.86	100.353	99.4962	95.0702	95.7691	88.4081	83.4334	84.704
ENSMUSG00000000402	Egfl6	3.3465	3.14823	3.21793	10.943	11.7791	11.9202	10.3515	11.7817	12.6531	8.98972	8.38955	8.65829	10.0114	10.0738	10.6325	19.9694	20.6303	16.8826	6.95174	8.58916	8.42342	6.59597	6.56048	7.21855	12.3506	12.7705	12.4726	0.573221	0.295758	0.478019	0.390517	0.257562	0.428052	0.57546	0.443404	0.500161	7.65998	6.41639	5.44288	9.67062	7.39164	5.24405	9.14095	6.56026	5.31343	3.31993	3.00465	3.06713
ENSMUSG00000000409	Lck	25.8361	22.0775	26.1443	30.3453	29.8888	30.8507	32.9594	28.5289	29.8928	26.5415	26.215	24.5991	27.6503	27.2242	28.9832	21.5947	19.6575	21.7115	28.8772	26.2429	26.0791	31.3712	34.1839	28.4491	24.7517	28.4742	27.4675	20.3665	16.7985	20.5308	10.0956	10.5766	12.8382	7.94649	11.1432	9.44338	17.6323	20.8914	15.8647	9.47563	9.57625	10.6646	10.5306	8.56901	8.70321	16.3529	15.526	14.289
ENSMUSG00000000411	Tssk3	0.0252043	0	0.0581079	0.019727	0.065268	0.0203736	0	0.0218582	0	0.0215837	0	0.023373	0.0190621	0	0.0232994	0	0	0	0	0	0.0188916	0	0.020038	0.0215041	0	0	0	0	0	0	0	0	0	0	0	0	0.0219835	0	0	0	0	0	0	0	0	0	0.0388131	0
ENSMUSG00000000416	Cttnbp2	2.18083	1.8054	1.77664	3.61305	4.09512	3.93228	3.65261	3.92464	4.68157	2.78841	3.14444	2.23426	3.44313	3.35195	3.05801	3.31157	2.87278	2.82875	4.59297	3.86012	3.9494	2.7944	3.1349	2.96857	2.51126	3.97019	3.4948	7.37257	6.89528	5.63695	4.2515	3.95089	3.27292	4.45847	5.217	4.48867	5.67395	7.20574	5.52029	3.68876	4.91177	3.20908	5.75137	4.98623	4.9276	3.0405	4.12938	2.83293
ENSMUSG00000000420	Galnt1	69.5026	71.9953	67.9254	64.0972	69.7942	63.7232	71.8993	70.4236	73.2068	57.4304	57.0172	58.2573	59.1915	60.616	60.9398	62.4683	58.1283	59.7874	54.4263	51.9144	45.9222	47.2603	44.8717	42.0501	49.3266	51.9324	43.3181	95.0438	85.7178	105.225	119.985	96.6556	108.104	88.2589	98.9604	90.8276	87.1082	82.8632	73.0717	70.708	68.7771	68.7406	78.2261	70.1097	73.6014	71.3668	72.4307	65.023
ENSMUSG00000000435	Myf5	0.0291851	0.0242161	0.0112227	0	0	0	0	0.0251596	0	0	0	0	0	0.0135628	0	0.0241014	0.0133079	0	0	0	0.0109608	0.0119453	0	0	0.0126812	0.0118327	0	0.746995	0.660921	0.717087	0.570894	0.659492	0.674907	2.26467	1.64921	2.42588	0.493512	0.70995	0.421829	0.185144	0.0744919	0.052697	4.74256	4.64954	3.15502	0.0726255	0.190402	0.180739
ENSMUSG00000000439	Mkrn2	20.0154	19.8507	20.2117	18.4277	18.6412	19.6787	19.3386	20.0136	18.6895	19.5726	17.7375	20.3991	20.9027	20.9074	20.9048	21.2876	20.4012	20.1441	18.9839	17.9694	17.8791	18.6381	18.9213	18.1388	19.0263	20.2894	19.8314	21.4716	25.1984	23.9277	22.0871	20.8195	22.0988	23.0069	21.5241	21.6917	24.2376	25.0033	22.0811	27.7478	24.3051	26.1691	25.5909	22.9925	25.0728	23.1364	20.4699	20.3655
ENSMUSG00000000440	Pparg	0.0712939	0.103998	0.208723	0.0715064	0	0.0420994	0.121677	0.0637392	0	0.216651	0.255488	0.169062	0.0274449	0.0670613	0.0666532	0.0457932	0.0838797	0.0689413	0.17835	0.163621	0.208778	0.180068	0.3386	0.268591	0.112084	0.0600809	0.086364	0.361885	0.0989748	0.167406	0.103063	0.272298	0.245725	0.0980032	0.0805056	0.059775	0.52224	0.481863	0.415226	0.0805817	0.151139	0.0638113	0.151316	0.0746097	0.162758	0.424245	0.481002	0.405962
ENSMUSG00000000441	Raf1	103.593	101.941	102.394	91.5765	92.3114	90.5785	105.47	100.088	93.5221	96.5321	96.2555	100.764	101.288	103.811	106.653	101.982	97.7322	104.5	86.9074	85.999	84.8743	91.6696	90.0793	89.0963	91.4456	90.1163	87.2629	104.06	84.2761	104.915	111.012	109.457	115.405	113.549	109.651	105.42	115.526	115.481	109.068	123.489	120.965	123.209	116.177	112.75	115.842	112.698	110.301	108.802
ENSMUSG00000000486	2019-09-01	8.41947	10.1566	9.63757	9.22834	8.71585	11.4273	8.87099	7.86762	8.20411	6.43965	5.73469	5.76984	6.15038	6.50093	6.87782	6.22364	5.09459	8.24341	5.03905	4.80085	5.46551	4.90643	4.56128	5.95328	4.04533	4.39945	4.68865	8.68825	11.1141	10.0914	8.58596	6.55167	7.70813	7.52397	6.62581	6.2979	7.69953	10.4529	10.5851	7.30658	8.09126	8.07123	7.07433	7.01609	8.74618	7.72986	8.06018	7.89033
ENSMUSG00000000489	Pdgfb	0.629247	0.723368	0.780786	1.21953	1.18902	1.15638	1.20149	0.907661	0.704273	1.96976	1.9853	2.53827	1.34207	1.21318	1.04935	1.06243	1.2273	1.37697	1.6873	1.55784	1.50312	1.28154	1.2571	1.29303	1.13999	1.12909	1.6012	6.87823	6.07748	6.38873	6.36989	4.7571	4.50326	5.93972	4.82333	5.0207	7.50667	7.89361	6.52716	6.64525	6.39923	5.71299	7.20601	7.03294	6.44306	1.27781	1.38473	0.801162
ENSMUSG00000000530	Acvrl1	0.224843	0.350413	0.263546	0.190335	0.130941	0.287115	0.716258	0.229278	0.258621	0.462849	0.351768	0.260552	0.323139	0.347065	0.397273	0.594674	0.812106	0.737923	0.987197	0.910224	0.814441	1.10021	0.953552	0.928395	1.26323	1.69722	1.4907	12.6971	9.1786	13.9092	17.3387	9.02498	9.72031	11.5102	11.6604	10.4693	16.3237	16.5315	13.0374	11.5021	10.9915	10.0802	14.4058	11.9803	10.7212	1.19476	0.941115	0.385916
ENSMUSG00000000531	Grasp	29.3208	25.7129	23.5665	9.21947	8.90064	9.39942	5.76879	5.65813	5.45075	15.5561	16.3977	17.4226	25.3817	23.8653	23.3426	19.2412	21.9031	18.7611	28.3971	33.0624	28.1893	35.0592	34.0734	39.0313	27.7006	25.1835	31.2502	8.92421	8.08037	9.56056	11.7539	9.87873	9.5039	10.142	9.7772	9.72545	11.4884	11.1247	9.3827	11.0288	10.3996	11.3391	16.8755	13.3612	14.2317	47.531	49.9523	47.6208
ENSMUSG00000000532	Acvr1b	29.0478	27.1572	28.0746	37.0342	35.4829	37.6893	42.0929	40.1997	35.5122	56.8481	52.806	50.6598	67.8617	64.0584	61.4008	70.5817	68.2195	63.7448	65.8048	69.6858	70.035	71.3642	74.18	73.287	70.1095	73.7625	76.6496	16.3489	11.8	15.3225	15.8504	15.9068	15.8953	15.7564	16.7776	16.1549	15.7024	15.2804	12.6416	13.9602	14.1951	13.1614	15.6367	13.5621	14.2955	37.9691	38.6574	35.3473
ENSMUSG00000000538	Tom1l2	12.2062	11.0934	11.3004	11.7699	11.4968	12.608	13.6087	10.8766	9.41657	13.6165	13.6726	14.2404	12.6469	12.997	12.689	13.0783	13.205	13.1307	11.9482	13.0177	12.6374	14.3202	14.1025	14.1442	11.5893	13.0706	12.256	11.0518	9.93093	10.6533	11.6059	12.4921	11.3022	11.5485	10.3281	10.1064	15.8693	16.1532	15.0596	15.7806	15.2108	15.5522	15.9491	14.9954	14.6324	17.1122	16.1976	16.1684
ENSMUSG00000000544	Gpa33	0.437045	0.551843	0.621535	0.442768	0.310346	0.41608	0.614166	0.544917	0.358711	0.780051	0.686961	0.803849	0.345068	0.627598	0.542758	0.58934	0.325243	0.55216	1.09956	1.03286	0.925375	0.572332	0.51174	0.514623	0.997106	0.796372	0.789355	0.0783473	0	0.0129872	0	0	0	0.106945	0.0525481	0.0730122	0.0393465	0.0419869	0.0230148	0.0837559	0.0351762	0.0412652	0.144363	0.0366501	0.0651563	0.452416	0.383016	0.33737
ENSMUSG00000000552	Zfp385a	77.6297	67.3675	69.6568	107.384	100.01	117.506	98.8892	88.9464	70.1222	65.4254	59.4307	67.0279	78.1998	78.141	81.3328	70.4106	70.9663	67.0358	67.2918	66.4862	72.5818	65.5743	69.9748	67.3718	56.5437	59.4439	64.6884	42.4048	39.9397	37.0873	44.5205	40.93	36.0657	41.0365	36.848	38.3635	33.5642	34.6042	33.2763	30.4218	29.0381	30.7106	32.6341	31.4088	33.6754	43.2214	42.1443	47.3378
ENSMUSG00000000555	Itga5	11.7927	11.7708	10.5471	9.45117	10.2735	10.6416	11.0628	9.77421	8.38781	8.17898	7.52649	7.7349	10.3566	9.81186	9.61605	7.79853	8.56448	8.52522	9.20798	9.29881	9.91803	9.91584	9.02715	10.1338	9.50467	9.00582	9.50398	27.3118	23.5981	25.5438	26.9752	24.106	25.336	26.4079	26.0335	24.9561	37.8809	37.6204	33.454	36.4672	34.3224	32.2522	38.7613	34.4266	32.9989	9.82277	9.38457	8.95559
ENSMUSG00000000560	Gabra2	0.012558	0	0	0	0.0108214	0.0202966	0	0	0	0.0639639	0.130082	0.0462496	0.0472256	0.0699338	0.0575457	0	0.0114366	0.0484064	0.203461	0.0608384	0.0660551	0.0411503	0.0501348	0.0751376	0.120152	0.0611377	0.0234304	0.0233637	0.0232455	0.0237204	0.0460741	0.212794	0.409322	0.107503	0.0943274	0.0207587	0.217555	0.203467	0.215392	0.466163	0.256279	0.317332	0.356498	0.235143	0.206502	0.062459	0.0770614	0.0291602
ENSMUSG00000000561	Wdr77	100.34	111.652	99.2418	90.1564	92.7106	100.473	103.114	102.732	99.069	71.2758	72.5196	78.1508	77.8078	79.6887	78.4934	81.0475	74.9346	75.0741	67.6455	63.6287	63.9096	72.2138	69.5884	68.0972	72.1222	69.1779	65.7577	107.594	93.1586	106.509	104.81	104.538	110.893	95.611	81.8133	91.3688	57.7151	56.2808	50.7947	60.4393	58.3761	57.0885	57.204	50.5791	58.9212	81.7277	78.0295	76.3379
ENSMUSG00000000562	Adora3	0	0	0	0	0.0228165	0	0.015519	0.0692301	0	0	0	0	0.00994287	0.025765	0	0.02341	0	0	0	0.0453559	0.0209842	0	0.0223933	0	0	0	0	0.201566	0.225398	0.182077	0.431158	0.0729995	0.07039	0.0790941	0.0122647	0.0108345	0.0778238	0.0728555	0.0645339	0.0748476	0.0109586	0.0810182	0.164638	0.0958664	0.0967364	0	0.0198682	0
ENSMUSG00000000563	Atp5f1	247.173	255.606	253.946	216.988	216.08	226.228	239.496	236.174	276.756	248.015	214.924	231.564	257.055	243.67	244.935	245.521	234.493	246.717	252.564	225.056	230.491	263.795	248.725	249.883	234.949	262.159	235	319.035	426.484	373.152	310.697	325.414	379.568	315.266	324.77	310.828	267.575	280.755	280.653	303.035	254.014	296.731	280.085	277.667	278.444	271.513	252.821	244.046
ENSMUSG00000000567	Sox9	7.07091	7.09407	6.87807	23.9077	23.7199	27.0479	13.6934	13.2186	12.8718	5.07294	4.89221	7.79569	14.8175	14.6253	14.7295	9.26302	11.7277	9.38536	3.50884	4.05428	3.21802	6.99386	9.19634	9.80675	5.48092	7.05759	7.81261	47.4472	47.3046	44.8969	39.14	44.3085	38.4237	33.2359	30.5645	33.4747	65.6038	60.4696	50.1821	11.866	11.9138	12.889	26.7138	20.5534	25.3135	6.00942	6.87522	5.72125
ENSMUSG00000000568	Hnrnpd	929.875	992.329	957.479	896.904	1028.95	789.745	858.027	975.1	1183.48	786.452	773.664	788.794	765.024	766.329	868.955	805.806	742.709	834.186	757.571	674.769	704.737	757.781	767.082	766.014	799.227	797.894	748.216	1140.77	1420.86	1253.54	1223.59	1304.65	1309.14	1154.77	1296.27	1289.44	1045.13	956.626	950.115	948.664	955.919	987.947	956.356	876.153	1001.33	816.901	816.289	837.648
ENSMUSG00000000579	Dynlt1c	15.1119	19.6642	15.8	16.2368	22.5854	19.898	17.0118	16.6839	19.0783	13.6163	11.8364	11.4663	10.609	12.4861	11.2122	9.93991	10.3549	14.1803	14.539	12.2038	14.3805	14.6734	14.3552	13.2979	13.1817	13.4418	12.1972	18.3664	18.7674	24.0955	22.1652	21.6217	26.3775	18.6654	19.5154	20.1571	12.6465	12.2604	11.1136	11.8943	11.8618	10.5489	11.9582	10.3801	9.77947	13.1868	10.9922	10.1625
ENSMUSG00000000581	C1d	79.7309	76.3023	83.3891	78.7457	81.1375	79.6841	80.5081	69.2051	86.9525	107.721	90.6106	112.267	113.705	95.2507	101.81	95.0681	94.1185	86.9262	95.7362	87.7125	80.5575	99.829	90.3485	83.7934	98.9239	97.4816	87.7632	89.6166	113.471	101.531	119.667	104.488	94.0187	94.974	86.5085	99.3372	103.009	119.986	101.154	103.764	94.9875	106.558	109.043	100.054	109.648	95.7698	92.0917	84.2473
ENSMUSG00000000594	Gm2a	2.99649	2.62834	3.20441	3.67576	3.65856	3.70043	3.44965	3.34012	3.09626	6.34795	6.34237	6.40912	5.87074	5.50488	5.18216	4.84616	4.98936	5.03366	8.24194	8.09491	7.16623	7.08694	8.01323	7.95789	6.47756	7.10223	7.26973	2.29516	3.04704	2.74572	1.26485	2.02021	1.93288	1.98547	1.93825	2.17412	4.09242	3.98592	3.48348	3.42674	3.04373	3.15175	3.98906	3.09401	3.39072	4.0364	3.70066	3.52499
ENSMUSG00000000600	Krit1	16.055	18.1837	17.6629	15.8899	16.9892	16.6708	15.8292	17.302	18.9899	16.7004	16.161	16.391	16.1061	16.9472	16.2821	16.2397	16.6012	16.6934	15.3576	14.868	14.3131	15.5247	14.7144	15.5773	15.1011	15.4139	15.0354	18.5445	15.3139	20.9419	17.4387	18.7612	20.1092	17.8414	17.8967	18.2011	15.7183	15.0825	13.8012	16.5051	15.1903	14.952	14.6524	13.094	14.4035	15.5586	15.4299	14.7155
ENSMUSG00000000605	Clcn4-2	16.7472	16.6238	15.855	14.6649	15.1431	14.1756	15.1281	14.2892	14.3339	25.9347	24.86	26.2355	23.2977	22.858	23.142	23.0948	21.6604	23.2316	25.3054	24.1733	24.772	22.5867	22.7792	22.6517	22.8174	23.794	22.8828	14.0563	13.3299	14.7025	15.1617	14.1592	14.9291	15.2702	17.8477	16.3948	21.6725	19.7876	18.2473	21.7444	19.5557	19.0409	22.5912	20.4961	20.3847	24.4671	23.258	22.6875
ENSMUSG00000000606	Vmn2r88	0	0	0	0	0	0	0	0	0	0	0	0	0	0	0	0	0	0	0	0	0	0	0	0	0	0	0	0	0	0	0	0	0	0	0	0	0	0	0	0	0	0	0	0	0	0	0	0
ENSMUSG00000000617	Grm6	0	0	0	0	0	0	0	0	0	0	0.0209094	0	0	0.0208099	0	0	0	0.00662855	0	0	0.00701744	0	0	0	0.0197855	0	0	0.0898858	0	0.0765187	0	0	0.00820164	0.042772	0	0.00758779	0.019049	0.00805951	0.00753484	0.00817112	0.0604873	0.00810805	0.0153655	0	0.00753671	0.00575807	0.0169813	0.016569
ENSMUSG00000000627	Sema4f	0.844941	0.937152	0.718535	0.492248	0.655785	0.442743	0.470414	0.409383	0.333271	0.580443	0.474466	0.46386	1.07346	0.954361	0.961867	0.499304	0.787894	0.669911	0.213867	0.287694	0.348021	0.48352	0.227746	0.225276	0.459225	0.329775	0.304934	0.745107	0.76196	0.604001	0.958341	0.815662	0.799719	0.627966	0.472251	0.505016	4.61405	4.14772	3.73151	8.57329	8.00052	8.14069	4.47036	3.99856	3.64944	1.59615	1.77148	1.43017
ENSMUSG00000000628	Hk2	23.4323	23.0862	21.1252	26.6491	28.3746	24.9555	30.4595	29.2279	28.6393	28.5558	29.2673	31.965	31.7101	32.3118	32.7971	29.197	30.4755	31.487	26.3068	30.4394	40.2007	27.7659	26.4511	31.0599	30.7792	24.1868	34.9777	18.8118	32.4552	16.6339	27.4037	22.6747	20.2361	19.1372	22.2939	18.1785	12.3314	13.2338	12.9118	12.4496	14.8777	15.3021	16.4099	13.184	14.7744	19.7196	21.2204	23.4322
ENSMUSG00000000631	Myo18a	22.2539	19.447	17.9944	22.7386	24.6793	20.8301	27.6019	20.9496	19.9595	33.2912	31.2254	33.8467	27.9543	25.6427	28.5562	27.7215	25.4018	29.6689	40.0363	39.5417	45.8303	26.9912	32.3802	26.8758	30.4886	33.6941	34.3571	26.9491	36.7845	23.4804	31.6981	28.2233	30.2992	32.3942	29.3821	29.5735	25.9937	29.3333	22.0347	25.023	26.9899	25.2291	28.7621	21.992	22.2062	23.2664	20.5383	19.8607
ENSMUSG00000000632	Sez6	0.412568	0.339402	0.680227	0.0769647	0	0.0231954	0	0.0123368	0	0.00743853	0.041348	0	0	0.0261239	0.0324863	0.0317738	0.0816202	0.179655	0	0.0146158	0.0849284	0	0	0	0.00788203	0	0	0.0804903	0.121674	0.0348903	1.15863	0.331145	0.434991	0.008421	0	0	0.149962	0.0532261	0.108577	0.828983	0.680154	1.18893	0.183959	0.165028	0.225187	0.553382	0.467814	0.26492
ENSMUSG00000000673	Haao	0.0266015	0	0.122646	0	0.0688993	0.107518	0.186129	0.138529	0.0462347	0.273627	0.0757316	0.123442	0.3221	0.299138	0.123073	0.176639	0.34243	0.439625	1.17767	0.920745	1.11627	1.2357	1.47972	1.29342	1.56372	1.50407	1.77968	0.0745109	0	0.227068	0	0.171912	0	0.0509506	0.0255174	0.0220886	0.18576	0.0481957	0.193026	0.193961	0.0681239	0.0962717	0	0.100286	0.109255	0.0221504	0.040982	0
ENSMUSG00000000682	Cd52	0.493647	0.41709	1.32242	0.572148	0.286273	0.73245	0.487582	0	0.0719524	1.17324	0.322064	0.867227	0.702016	0.801375	0.633037	0.20979	0.629041	0.828482	1.42108	0.981347	1.46334	0.525555	0.320828	0.487294	0.138855	0.913899	0.45156	7.79568	10.8604	8.17438	2.58699	7.34366	9.38211	6.3974	4.48868	6.68128	5.85086	4.89335	4.1067	4.46656	3.92271	4.88718	5.33551	4.85805	4.03964	2.37146	1.28894	1.53602
ENSMUSG00000000686	Abhd15	1.62177	1.61572	1.34124	1.13164	1.01667	0.958197	0.287486	0.44767	0.499439	0.282303	0.41997	0.35619	0.140306	0.213975	0.191354	0.146322	0.160548	0.0990179	0.114607	0.0954329	0.123606	0.0770972	0.028326	0.114095	0.144023	0.154297	0.0554336	0.305179	0.67931	0.342662	0.711468	1.0859	0.982455	1.87281	1.2528	1.3476	0.323516	0.304656	0.37007	0.319184	0.309351	0.255254	0.470548	0.453182	0.417341	1.1072	1.20057	0.90078
ENSMUSG00000000690	Hoxb6	0	0	0	0	0.0218978	0	0	0	0	0	0	0	0	0	0.0148265	0	0	0	0	0	0.019123	0.0133784	0	0	0	0	0	0	0	0	0	0	0	0	0	0	0	0	0	0	0	0	0	0	0	0	0	0
ENSMUSG00000000693	Loxl3	4.45422	3.76617	3.46342	4.22718	4.81962	4.9367	5.03885	4.72456	4.39405	1.39519	1.95846	1.66537	1.09853	1.71517	2.33244	1.53673	1.97067	1.68114	0.873697	1.01455	1.4256	0.331862	0.21398	0.288143	0.334293	0.18361	0.173358	4.01242	2.71611	4.55283	7.14649	4.62785	4.82469	4.69413	3.89259	3.84887	11.2738	9.29324	7.61974	7.33311	6.8867	6.36547	8.4999	7.70051	8.13876	4.37247	4.13054	3.7673
ENSMUSG00000000701	Tcl1b5	0	0	0	0	0	0	0	0	0	0	0	0	0	0	0	0	0	0	0	0	0	0	0	0	0	0	0	0	0	0	0	0	0	0	0	0	0	0	0	0	0	0	0	0	0	0	0	0
ENSMUSG00000000706	Btn1a1	0.174388	0.0994026	0.0527547	0.127938	0.0147632	0.202701	0.35964	0.117819	0.0891961	0.0943282	0.178407	0.149599	0.0836562	0.119002	0.124144	0.105901	0.0622751	0.13503	0.0595878	0.0415587	0.0773458	0.142244	0.0548218	0.127233	0.0522763	0.0557073	0.108024	0.0637163	0	0.0485093	0.0314656	0	0.146977	0.346134	0.19198	0.106119	0.0222239	0.0616071	0.054087	0.0309814	0.109395	0.0547486	0.264452	0.337893	0.197127	0.141913	0.144462	0.0928539
ENSMUSG00000000708	Kat2b	4.39293	6.57955	3.76847	2.16769	3.05278	2.85004	4.09269	3.71151	5.14088	5.43147	4.55892	5.19426	3.77925	4.54274	4.45978	4.96278	3.95445	5.05359	5.85609	5.34075	4.20543	5.04805	4.69151	5.60929	5.01952	5.84895	5.32935	2.92467	2.75089	2.15295	0.93033	1.34363	1.49306	2.77918	2.24679	3.32398	3.39403	2.97203	2.22577	4.16161	2.95194	3.3372	3.55534	3.52382	2.96535	6.3121	5.402	5.05817
ENSMUSG00000000711	Rab5b	45.5691	47.9296	46.0649	44.8536	45.6236	48.1417	46.7307	44.7835	45.2707	59.4346	56.8865	56.8831	59.0757	56.5274	56.2681	59.5273	58.5607	56.6874	58.694	59.3445	58.6188	54.9262	55.8877	57.2829	51.3754	60.6167	57.9244	41.0304	28.3743	42.6088	34.4962	37.6311	40.4718	38.0877	36.6983	37.6541	51.426	50.0594	46.3203	49.0449	47.8464	45.0215	46.9919	44.2857	41.5086	55.9244	52.4445	51.6221
ENSMUSG00000000724	Cryba1	0.0924275	0.0773404	0.0354622	0.161644	0.160019	0.336358	0.216801	0.324479	0.281753	0	0	0.0433739	0.176388	0.263387	0.346759	0.193402	0.258426	0.454847	0	0.0740793	0.0344949	0	0.0364807	0.0393095	0	0	0.128113	0	0	0	0	0	0.128962	0	0	0	0	0	0	0.042515	0	0	0	0	0	0.0387245	0.250664	0.0358394
ENSMUSG00000000730	Dnmt3l	0.0191569	0	0	0.0727479	0	0.025187	0.0730611	0.10914	0	0	0	0	0.0265569	0	0	0.026092	0	0	0	0	0	0.0253994	0	0.0152382	0	0	0	0.0756652	0	0	0.664194	0.124575	0.111346	0.0371039	0.0543323	0.0510077	0.0525688	0.0271749	0	0.0551258	0.103671	0.108762	0.0516504	0.0537926	0.0858627	0	0	0
ENSMUSG00000000731	Aire	0.19463	0.0495971	0.181755	0.118147	0.0515533	0.17202	0.0632133	0.286609	0.12214	0.19406	0.145872	0.0843904	0.0843326	0.086082	0.180777	0.100704	0.0853598	0.082506	0.230213	0.327827	0.419534	0.220861	0.219215	0.448419	0.493782	0.496237	0.533094	0.305917	0	0.0365556	0	0.0623867	0.119646	0.32423	0.108437	0.024719	0.108542	0.0179357	0.0174578	0.0270638	0.0348684	0.0698109	0.0749779	0.0481389	0.0753263	0.183986	0.3468	0.366539
ENSMUSG00000000732	Icosl	3.97271	3.14084	3.69017	2.59997	3.23936	2.95264	3.50837	3.32265	3.22124	2.05369	1.95031	2.31873	1.80788	1.91695	1.96618	2.00172	1.64965	1.79114	1.307	1.43463	1.31023	1.31881	1.36488	1.46911	1.31859	1.43118	1.17523	2.08862	2.10742	2.17685	1.26364	1.5872	1.38468	2.23937	1.75762	2.15469	2.95602	2.90566	2.81586	2.45996	2.04906	2.09536	3.3657	2.67786	3.54619	3.94504	3.66423	3.58759
ENSMUSG00000000739	Sult5a1	3.68607	3.15539	2.40042	8.43967	9.16837	9.95865	14.0099	16.2268	10.8463	19.3302	17.9638	16.2152	34.9693	33.74	28.357	57.5893	51.0925	49.358	38.7904	44.673	45.5418	53.0913	50.1597	52.1	71.1287	71.5204	73.2649	3.32513	1.7417	2.72785	5.53948	4.94604	5.62779	5.09458	3.71741	4.30818	5.33558	4.88508	5.1036	6.81296	5.24297	5.55145	7.83737	6.3889	6.77493	6.77089	5.66877	5.41943
ENSMUSG00000000743	Chmp1a	68.7386	68.7423	69.0787	64.7523	64.2696	65.7859	73.9839	69.4586	62.3666	99.3695	89.0433	102.295	102.393	99.3524	99.6309	101.711	93.9601	100.41	86.0013	85.0825	85.9656	86.1504	86.4282	84.0287	89.3639	83.412	80.1468	53.5783	50.4591	53.4965	54.2085	51.7282	48.1044	54.4514	53.3087	49.0523	71.3308	80.922	71.2502	79.431	68.7259	82.384	74.6725	72.9188	76.5138	99.6541	97.7389	97.5702
ENSMUSG00000000751	Rpa1	113.646	117.957	107.13	90.4963	93.265	84.8257	107.673	99.3416	92.6187	109.46	101.059	107.445	108.643	110.449	108.74	98.8348	104.023	94.4038	84.1454	89.6999	90.7555	90.3373	93.3064	96.3819	81.5243	87.2316	87.7531	126.879	127.185	128.785	128.597	122.486	127.991	137.601	141.803	127.897	125.156	134.615	126.371	133.645	127.367	133.699	137.683	131.3	133.421	111.631	108.712	102.954
ENSMUSG00000000753	Serpinf1	60.3081	61.2269	55.0165	34.209	35.0349	38.0867	21.97	16.2555	16.4156	9.38816	9.40643	10.7512	9.57986	12.2889	10.7529	7.27162	11.9756	12.6292	4.26673	4.80088	5.31454	2.82391	1.80073	1.94932	1.54122	1.51052	1.5335	352.288	348.774	324.205	435.518	385.451	397.241	308.406	304.402	262.001	251.854	282.297	247.583	288.524	291.523	276.863	195.445	189.579	201.986	31.7864	34.3357	34.6308
ENSMUSG00000000759	Tubgcp3	47.1812	50.0299	46.757	43.7751	45.4894	45.3335	50.6896	48.9897	48.1795	42.5299	40.0058	42.2271	42.4872	39.5955	41.5511	43.3117	44.6353	42.9756	47.0898	47.7986	47.5856	45.4791	46.8734	49.7181	44.2324	47.4448	49.9042	46.4023	46.8391	47.4444	49.0178	45.4664	44.3116	46.0184	45.4969	43.3483	39.4387	41.4824	39.5032	41.3811	38.6964	37.3535	38.065	37.6672	37.608	45.2864	44.1922	45.2713
ENSMUSG00000000766	Oprm1	0.0336448	0	0	0	0	0	0	0	0	0	0	0	0	0	0	0	0	0	0.0188855	0	0.0259015	0	0	0	0	0	0	0	0	0	0	0	0	0	0	0	0	0	0	0	0	0	0	0	0	0	0.0218303	0
ENSMUSG00000000776	Polr3d	49.5138	48.9612	50.2666	47.8131	50.4079	52.0436	54.5079	55.4805	50.5101	38.1779	38.2965	42.8201	37.17	37.5893	39.7768	40.2063	42.367	39.081	41.1956	45.2839	39.5565	41.3267	38.5992	43.9663	39.349	39.789	42.6757	57.3975	52.9741	51.9914	74.391	57.5247	61.9839	55.2815	56.757	53.2409	36.564	37.9931	35.1014	39.5458	34.9572	38.9391	40.0011	38.4504	41.6425	35.304	35.6961	35.1703
ENSMUSG00000000782	Tcf7	32.7268	37.0235	34.8888	42.8108	44.9129	44.9684	26.4926	24.4973	24.2	13.9173	13.0402	14.5744	22.4677	24.0803	24.912	12.0061	12.8735	13.2807	16.6378	17.4076	17.3115	17.5937	16.6316	15.7215	10.3129	9.55737	9.52983	24.709	24.2998	23.2657	27.3661	27.5901	28.1304	27.4026	25.931	23.8112	21.0028	22.8623	24.2232	19.7824	19.8948	21.5659	14.3336	13.0863	14.8697	13.8468	13.0751	14.968
ENSMUSG00000000787	Ddx3x	401.078	439.837	443.893	441.69	463.045	437.001	441.323	477.011	528.912	485.207	475.164	502.594	478.679	468.195	491.228	470.096	457.701	490.255	470.214	370.704	377.402	475.076	409.074	378.242	443.817	408.799	336.522	455.607	320.502	503.199	472.504	511.542	559.444	456.732	530.583	531.027	393.406	348.898	358.666	378.79	358.961	382.485	379.622	338.317	403.564	397.348	374.826	368.502
ENSMUSG00000000791	Il12rb1	0.0210546	0	0.0325363	0.0169213	0	0	0	0	0	0.00896824	0.0198433	0.0099441	0.0161597	0	0.00979304	0	0.0197197	0.0101358	0	0	0.0162792	0	0.0174116	0.0186154	0.0189719	0.017783	0.0204434	0.00969792	0	0.0592077	0	0.0339282	0	0.0203009	0.019884	0.0264219	0.0722565	0.0374277	0.0262346	0.0284602	0.0267259	0.0282292	0	0.0463997	0.0437171	0.0263869	0	0.0395388
ENSMUSG00000000792	Slc5a5	0.35393	0.385508	0.412314	0.198547	0.148087	0.253316	0.16431	0.226086	0.0964853	0.0771307	0.0475492	0.111573	0.106366	0.131181	0.0740188	0.0833508	0.0643582	0.0875702	0.0738088	0.057186	0.0836263	0.116082	0.113133	0.172931	0.0968567	0.114964	0.103842	0.103409	0.0937391	0.104977	0.0123719	0.065264	0.0913803	0.048036	0.104057	0.0751612	0.122467	0.0727381	0.118575	0.118885	0.0343715	0.109465	0.109679	0.0756519	0.0997876	0.251279	0.201527	0.250431
ENSMUSG00000000794	Kcnn3	0.14585	0.184114	0.182527	0.167343	0.188545	0.242713	0.195078	0.199642	0.113349	0.107571	0.121947	0.150445	0.20448	0.149819	0.181158	0.0917064	0.156641	0.134375	0.33652	0.381875	0.277832	0.623386	0.626701	0.598739	0.11979	0.206515	0.326034	0.32493	0.167187	0.475226	0.486634	0.523016	0.657165	0.573241	0.572759	0.481761	1.08674	0.761456	0.578659	0.608789	0.759646	0.611364	1.42021	0.899203	0.743004	0.68502	0.631332	0.565368
ENSMUSG00000000804	Usp32	12.9042	13.6539	14.6718	15.0064	14.2466	13.4768	14.0744	14.4227	15.7511	15.2192	15.1293	14.5861	13.6226	12.9748	13.3621	13.6549	14.5222	15.6853	14.4827	13.6106	12.6497	11.8417	13.9238	12.5475	13.0418	11.8085	12.7717	10.6897	8.10157	12.1407	13.0557	10.1513	10.3061	12.038	11.1091	10.4165	10.8928	8.61604	8.29924	9.54912	10.181	9.45232	10.0847	9.9664	10.7509	14.6073	14.3598	14.2449
ENSMUSG00000000805	Car4	3.18596	2.91798	3.89621	5.30642	6.34007	5.60418	8.80025	9.40096	10.3733	0.237823	0.0503566	0.350831	0.0406377	0.10189	0.173078	2.05656	1.19471	1.31723	0.0419751	0.175242	0.277481	0.268117	0	0	0	0	0.0490734	0	0.0462768	0	0	0	0.236804	0	0	0.177814	0	0	0.0704844	0.0469162	0	0	0.0945264	0	0.0218136	0.0432221	0.0396528	0.0197438
ENSMUSG00000000811	Txnrd3	88.288	93.7517	138.433	106.203	68.582	96.1121	74.2156	54.5536	70.4843	79.0603	32.7233	48.2881	96.462	33.2657	74.9539	35.2661	50.6742	30.7503	42.9372	52.1161	84.2203	55.6535	37.2325	63.7802	39.7531	34.2436	40.6362	69.805	14.7527	54.7259	13.3173	159.512	24.5671	38.1636	87.6321	64.8899	97.8771	73.8997	34.4376	68.7687	42.6933	62.2824	67.748	33.1379	54.7879	82.5731	67.9707	57.9527
ENSMUSG00000000817	Fasl	0.118344	0	0.0364558	0	0	0.0255419	0.144817	0.0136319	0	0	0.120501	0.120613	0.0476083	0.0146992	0.0145144	0	0	0.0152587	0	0	0.086615	0.0258594	0	0.0270013	0.0274503	0.283924	0	0	0	0.0597549	0	0	0	0.0301084	0.01491	0.207071	0.219184	0.0284898	0.0142807	0.110963	0	0.0142694	0.0132073	0.110579	0	0.103643	0	0
ENSMUSG00000000823	Znf512b	35.4488	34.6723	34.2419	36.8335	37.2047	38.545	38.5689	38.9537	36.4332	51.4732	55.4911	56.2158	56.9077	57.1745	54.3668	54.9506	59.6981	55.2933	58.7039	60.6201	55.4963	58.5339	64.3883	60.3589	63.3538	55.0188	61.1788	29.8071	15.6982	25.331	27.1157	26.965	25.5297	28.8937	31.9501	32.2221	55.4013	49.8079	46.0438	66.528	59.1487	53.1032	56.8349	55.7199	55.8121	51.4706	47.3705	48.0064
ENSMUSG00000000826	Dnajc5	58.1615	65.2574	65.7263	63.472	63.1539	64.4909	60.5058	64.0054	58.2381	69.6309	67.76	68.3272	71.7306	71.9275	68.0725	70.5955	70.9281	61.9897	71.4361	68.1497	62.1373	70.6067	73.3273	65.6435	63.5207	70.1253	63.6571	72.1233	37.6497	63.5095	59.138	65.9068	63.4318	69.2424	57.857	61.2382	73.9112	69.7405	61.7797	67.9397	66.6964	60.6381	67.1446	59.761	61.5796	70.0376	67.4236	63.8431
ENSMUSG00000000827	Tpd52l2	148.84	122.32	129.087	125.824	138.548	120.385	148.337	125.075	127.086	106.764	102.226	116.091	119.326	114.46	121.826	117.051	105.917	116.196	106.592	96.1942	95.0391	105.342	108.054	106.181	112.895	114.56	97.3711	130.639	142.942	140.918	209.333	136.395	137.058	152.065	150.392	138.041	118.192	131.24	110.402	121.036	106.771	127.464	115.563	110.474	123.609	132.79	125.227	111.177
ENSMUSG00000000838	Fmr1	53.0176	57.0247	56.697	82.5572	90.2906	78.8811	71.9797	75.6283	93.2105	65.1266	63.2221	66.0635	55.2625	53.1958	57.6754	55.1522	51.6259	59.1958	53.8448	49.0489	50.9304	53.3382	50.9087	50.1971	50.0109	46.0906	49.4149	71.7211	64.0843	75.0475	96.732	96.2274	105.238	78.6568	91.9903	90.6625	77.1418	67.1752	63.7926	75.8328	74.2987	72.0314	73.4661	61.3526	70.5728	54.2757	52.4811	47.47
ENSMUSG00000000861	Bcl11a	73.3019	73.3881	72.9734	45.3316	41.0726	46.6593	42.3853	44.6452	43.0324	73.6814	72.149	67.4679	89.1373	84.5291	84.076	87.3664	94.495	78.904	108.472	125.151	116.816	108.761	109.255	127.548	123.434	130.003	154.258	34.694	33.3202	31.8535	46.8215	46.4764	47.8747	65.6716	63.5928	61.3056	53.9321	50.9846	46.792	135.824	135.086	128.842	98.4927	84.9608	96.6906	95.6442	91.8131	89.9261
ENSMUSG00000000869	Il4	0	0.0663075	0.0583447	0	0	0	0	0	0	0	0.0628492	0	0	0	0	0	0	0	0	0	0	0	0	0	0	0	0.0596027	0	0	0	0	0	0	0	0	0	0	0.119551	0.178745	0	0	0	0	0	0	0	0	0
ENSMUSG00000000876	Pxmp4	9.6043	9.04936	8.51222	8.56176	8.13702	7.4941	7.74661	6.64972	5.6472	11.5025	10.8701	10.3516	11.6185	10.9721	11.7836	13.0842	11.2476	12.4253	16.1443	16.7947	16.4619	15.7043	18.2576	17.7796	14.2741	17.9355	15.285	8.23495	7.89668	7.95204	7.64504	8.30055	7.60638	9.51812	9.34314	8.48173	13.1107	14.7642	12.4013	14.477	13.1847	14.4275	12.592	12.302	13.194	11.3696	12.365	12.6395
ENSMUSG00000000881	Dlg3	100.189	93.3658	97.7195	98.7759	102.45	108.525	101.998	103.418	99.7453	63.7487	61.7232	66.4101	63.1042	65.0242	67.7668	67.3588	62.1354	68.0973	58.9815	48.5932	53.7936	57.1692	56.4716	47.8668	56.0239	55.9473	49.8658	65.7937	58.1883	77.5263	71.8949	79.6207	87.3096	78.6836	87.0178	80.5802	49.3312	47.4503	42.21	47.125	43.759	47.5527	43.1417	40.2515	46.0525	62.989	61.6525	57.6516
ENSMUSG00000000884	Gnb1l	11.4283	10.5086	11.1668	8.69876	8.16739	8.78623	13.0951	11.1134	9.06079	10.8943	11.1424	13.1397	10.3547	11.1302	10.2865	13.7202	11.791	11.7201	9.85271	10.4661	10.3127	11.0816	11.3132	10.8762	10.2199	9.82803	10.1489	10.1838	8.67193	8.83096	6.14977	8.80213	9.6496	9.69449	7.66208	8.12921	9.34578	11.2688	8.23803	9.42454	9.97323	11.2728	10.848	10.2455	11.8504	13.0716	13.757	11.3986
ENSMUSG00000000889	Dbh	0	0	0.0276966	0.0576046	0.0105329	0.00992651	0	0	0	0	0	0	0	0	0	0	0	0.011515	0	0	0	0	0	0.0105633	0	0	0	0	0	0	0	0	0.0108248	0	0	0	0.0102604	0	0	0.0215513	0	0.0106839	0	0	0.00992383	0.00998844	0.00917042	0
ENSMUSG00000000901	Mmp11	33.9392	31.7168	31.3495	42.0236	38.8501	42.3079	48.1532	47.4119	38.4103	66.4739	64.3715	71.8038	54.0296	56.3777	53.4388	76.3502	73.4079	70.6678	60.2716	69.2267	66.9891	59.9322	61.4234	65.1688	76.1852	74.2698	81.4513	11.1505	14.2148	13.281	10.189	13.3479	13.3363	17.4171	18.2912	16.3219	39.7665	40.8987	35.1929	59.4067	49.6015	53.4437	59.2	50.4004	50.0845	51.4019	49.9092	50.7753
ENSMUSG00000000902	Smarcb1	173.57	169.34	159.847	149.5	149.029	146.533	167.898	158.725	142.983	154.164	153.261	163.311	159.786	164.328	166.635	151.942	149.143	152.022	126.926	142.415	143.926	138.819	134.498	146.284	139.698	143.402	152.076	173.916	189.383	161.008	170.431	156.503	154.42	166.117	170.816	153.932	185.031	197.613	180.628	193.877	182.192	197.658	182.924	173.856	180.541	172.853	172.573	171.345
ENSMUSG00000000903	Vpreb3	0	0	0	0	0	0	0	0	0	0.0896548	0	0	0	0	0	0	0	0	0.042198	0	0	0.0524044	0	0	0	0	0	0	0	0	0	0	0	0	0	0	0.0558797	0	0	0.0471773	0	0.0571029	0	0	0	0	0	0
ENSMUSG00000000915	Hip1r	23.4424	21.2031	20.8135	25.5376	25.4833	27.9103	25.4886	23.6024	19.3664	29.5758	28.736	33.5189	27.1289	27.5985	27.6502	28.0883	29.5467	28.528	29.602	28.798	30.3609	26.1674	27.793	27.6024	29.7528	26.305	28.6404	4.96922	4.40437	5.13631	8.00662	6.60213	6.40925	5.00481	4.83284	4.07847	3.89717	3.88744	3.4768	4.01253	3.67639	3.49618	5.35419	4.78891	4.75653	22.1907	21.2315	20.1282
ENSMUSG00000000916	Nsun5	14.1081	15.0551	14.0867	12.9327	13.1978	12.2224	13.7172	14.7257	12.728	12.5207	11.5035	13.3825	14.6737	15.9622	14.8169	16.0101	15.5619	14.1524	12.8972	14.3864	16.7324	14.3616	15.6678	16.374	17.3034	14.6404	18.4837	18.7514	19.4752	17.0631	18.9509	18.5023	14.2399	15.6848	16.2748	16.3166	18.6984	21.5079	16.4233	21.7747	19.7665	19.0347	20.2635	17.7996	19.4856	15.5716	15.5283	14.9889
ENSMUSG00000000934	Top1mt	5.63964	5.51061	5.45199	3.627	3.5146	3.75046	3.728	3.60079	3.44059	3.55148	3.17745	3.65696	4.06624	3.64299	4.24853	4.11436	4.0011	3.78158	5.35615	5.5121	5.77143	5.06215	5.89821	5.65773	4.92569	5.43269	5.66133	3.55573	5.77318	4.49409	5.17975	3.82362	4.22813	4.71333	3.77225	4.00004	3.46815	3.22507	3.56803	3.17107	2.57841	2.31363	3.27285	3.56622	3.4967	4.18549	4.5285	4.51577
ENSMUSG00000000938	Hoxa10	0	0	0	0	0	0.0357	0	0	0	0	0	0	0	0	0	0	0	0	0	0	0	0	0	0	0	0	0	0	0	0	0	0	0	0	0	0	0	0	0	0	0	0	0.018493	0	0.0262904	0	0	0
ENSMUSG00000000942	Hoxa4	0	0	0	0	0	0	0.0685154	0	0	0.0334806	0.0185512	0	0.0296108	0.0183019	0.0180717	0.129922	0.0359155	0.0569825	0.015846	0.0791022	0.0589013	0.16034	0.234468	0.117296	0.357336	0.953196	1.04141	0	0	0	0	0	0	0	0	0	0	0	0	0	0	0	0.0328417	0	0.0322541	0.0163039	0	0
ENSMUSG00000000948	Snrpn	4.9016	4.29838	4.71498	6.59941	7.15874	6.65975	6.75722	6.53272	7.40752	4.51591	5.19928	4.55484	5.66727	4.80483	4.35809	4.84173	4.85607	6.18533	5.48188	4.76498	6.50282	7.90188	8.93967	7.93342	5.53611	3.12117	4.68058	3.98253	0.888749	3.78488	2.54499	3.45949	3.60662	3.63399	3.15258	4.17614	3.12377	2.8002	2.99881	3.83679	3.415	3.51021	3.09733	2.99003	3.33432	6.39369	5.33048	4.39282
ENSMUSG00000000957	Mmp14	135.324	127.508	124.494	78.4351	79.469	83.9851	79.4455	70.9716	61.6379	123.523	121.076	137.88	99.7928	96.1357	97.4478	84.342	86.1074	84.0003	114.618	121.673	130.689	103.787	106.834	112.931	95.5141	99.4021	104.307	54.4555	46.4431	49.8587	49.9198	47.5328	47.9466	41.8276	41.9389	40.369	121.093	110.081	88.9372	124.903	113.552	110.018	112.715	84.4028	86.6913	98.8443	97.8861	93.4122
ENSMUSG00000000958	Slc7a7	1.30223	1.12736	1.23015	1.16618	1.15899	1.33837	1.06907	0.914949	0.822986	1.37134	1.13397	1.10876	1.12927	1.10476	1.38956	1.09857	1.04528	1.18788	1.08852	1.08537	1.11645	0.753267	0.57608	0.858811	0.775094	0.723192	0.857921	1.42265	1.09932	1.4712	1.14222	1.53066	1.37302	1.33392	1.0791	1.24075	2.35613	2.18028	2.21176	2.00072	1.89049	1.89113	1.91553	1.88321	1.68731	1.35003	1.18403	1.20527
ENSMUSG00000000959	Oxa1l	50.5959	53.8372	51.7132	51.1651	47.9939	54.2726	53.1377	51.8277	44.5662	46.6832	42.0529	45.3751	48.4022	48.8149	46.3756	51.7853	50.7554	44.7665	45.2377	49.0633	46.35	46.5342	46.8171	50.6753	45.3455	51.9136	51.8655	52.8523	51.6229	50.4049	45.0743	52.3356	50.4283	54.9295	46.6577	50.935	49.5352	51.7161	45.4148	51.6641	46.2391	45.8726	52.4705	46.2275	50.0876	47.1242	45.5658	46.3891
ENSMUSG00000000976	Heatr6	16.6517	17.5427	15.3277	15.421	16.0771	16.0172	19.0716	17.1625	14.1725	15.5681	16.865	16.3328	16.8792	17.459	16.5247	18.934	17.8813	16.0243	14.0486	14.5924	14.7493	13.7322	14.8258	15.2622	15.4397	15.9132	16.6484	17.6557	10.2975	15.1777	19.455	17.1404	17.2478	16.8951	14.7518	14.895	18.3977	17.7859	15.7027	18.2065	20.3053	17.323	16.7608	14.8171	16.2012	16.5584	17.3992	15.6896
ENSMUSG00000000982	Ccl3	0.235767	0.276266	0.0723616	0.146894	0.0408233	0.266936	0	0	0.164293	0.410029	0.181036	0.30996	0.14404	0.224098	0.265531	0.236896	0.351803	0	0.639275	0.377849	0.457467	0.3051	0.0372106	0.160415	0.161594	0.302685	0.34849	1.06235	2.68971	2.07003	4.07178	2.32739	2.15085	0.638572	1.07437	0.630745	0.624435	0.603665	0.818317	0.824586	0.526274	0.599488	0.636738	0.224398	0.734903	0.237143	0.328928	0.219422
ENSMUSG00000000983	Wfdc18	0	0	0	0	0	0	0	0	0	0	0	0.0810538	0	0	0	0	0	0	0	0	0	0	0	0	0	0	0	0	0	0	0	0	0	0	0	0	0	0	0	0	0	0	0	0	0.0317701	0	0	0
ENSMUSG00000001014	Icam4	0.155401	0.0651148	0.209704	0	0.0343712	0.161482	0.375596	0.0702922	0.208569	0.302896	0.111358	0.559416	0.150942	0.370447	0.147408	0.167857	0.445124	0.45655	0.417236	0.355143	0.149391	0.324624	0.222844	0.239551	0.345991	0.357836	0.299531	2.27052	1.77354	2.45877	0.283399	1.09755	1.07753	0.87287	1.03323	1.54056	2.53906	2.06331	1.59104	1.63188	1.35861	1.88507	2.52261	2.28225	1.61019	0.261969	0.330538	0.174995
ENSMUSG00000001016	Ilf2	275.971	304.591	304.573	274.932	281.282	281.096	279.151	287.059	300.296	250.25	236.121	252.584	257.78	258.997	265.527	249.832	237.815	238.25	218.999	210.85	206.294	226.779	225.065	223.043	216.746	226.53	212.77	381.736	452.631	399.531	411.379	401.115	435.142	377.974	366.884	375.94	308.124	324.289	287.887	325.566	303.418	329.122	292.738	274.141	297.733	259.884	255.044	234.431
ENSMUSG00000001017	Chtop	188.513	194.454	193.325	167.244	162.755	164.807	163.14	174.329	167.383	203.819	197.42	203.238	218.503	210.257	214.821	216.406	214.945	200.767	175.06	179.019	161.756	187.594	178.967	192.223	192.047	201.019	193.983	188.968	221.19	183.156	176.181	188.48	183.651	181.938	185.976	176.48	229.948	232.488	215.269	240.457	223.49	224.391	224.959	211.972	213.415	246.313	236.83	228.702
ENSMUSG00000001018	Snapin	39.7794	45.309	45.272	41.7236	40.3581	44.124	41.0519	43.0504	42.0699	41.4378	41.1457	42.9507	39.8557	40.1755	41.6711	43.7537	46.3326	42.888	48.3349	48.0332	46.8457	43.3623	43.916	48.5459	44.3561	48.7799	50.6472	23.7325	27.0108	28.1224	19.6782	28.2155	25.9612	33.3829	30.2196	30.5368	31.5977	28.97	27.2657	33.0225	30.9859	29.4099	35.4187	33.2649	33.4797	49.1914	46.8115	48.5803
ENSMUSG00000001020	S100a4	0.176459	0.224655	0.13559	0	0	0	0	0	0.0793142	0.157476	0	0	0.140122	0	0	0	0.184359	0	0.285339	0.363	0.403831	0.570131	0.498128	0.231601	1.38601	1.38286	1.25895	5.63463	7.53917	4.73087	2.55299	2.42897	3.3095	0.744862	0.469792	0.377778	13.0626	13.3993	9.39026	3.05614	2.05974	3.28021	5.43071	5.18252	5.82778	0.528648	0.484611	0.264656
ENSMUSG00000001021	S100a3	0.635893	0.267414	0.204103	1.35	1.26829	1.10173	1.28619	1.49807	0.854592	0.879603	1.01961	1.43598	0.662933	0.968975	0.812235	0.368552	0.357633	0.366389	0.870119	0.834355	0.772258	0.616789	0.821282	1.16478	0.84455	0.751078	0.763204	0	0	0	0	0	0	0	0	0	0	0	0	0.0487118	0	0	0	0	0	0.0448628	0.0411564	0.15908
ENSMUSG00000001023	S100a5	0	0	0	0	0	0.0961849	0	0	0	0	0	0	0	0	0	0	0	0	0	0	0	0.0938633	0	0	0	0	0	0	0.804081	1.11426	0	0	0	0	0.12857	0.0997026	0	0	0	0	0	0	0.302877	0.210932	0.190351	0.697626	0.273851	0.173022
ENSMUSG00000001025	S100a6	17.8892	13.2399	17.1661	16.7015	18.1744	15.8774	50.266	41.9133	54.1725	28.7778	28.1212	33.955	19.0532	17.7624	20.4851	23.1854	21.2216	33.4141	24.1422	23.7574	28.0481	28.9266	28.0816	24.8829	37.6641	30.8395	33.204	16.7479	25.6156	26.0356	7.67735	5.36661	7.67145	3.13645	3.15589	3.1017	34.7634	33.9658	29.3325	11.0076	7.9715	8.05731	12.2952	9.44824	9.74666	10.803	12.8757	10.9529
ENSMUSG00000001027	Scn4a	0.0693374	0.0824778	0.080046	0.0408954	0.0149207	0.0315129	0.0652763	0.0742892	0.0037565	0	0.00812521	0.0158864	0	0.0159994	0.019748	0.0534495	0.027473	0.0581685	0	0.00701091	0	0	0	0.0111257	0	0.00352572	0	0.0120678	0.00806428	0	0	0.0349447	0.0545759	0.0246343	0.0241141	0.028577	0.0411074	0.0349768	0.0546174	0.0625351	0.0477956	0.0546729	0.0613554	0.0484985	0.0285202	0.125402	0.142586	0.13746
ENSMUSG00000001027	Scn4a	0	0.0884866	0	0	0	0	0	0	0	0	0	0	0	0	0	0.0892782	0	0	0	0	0	0	0	0	0	0	0	0	0	0	0	0	0	0	0	0	0	0	0	0.196891	0	0	0	0	0	0.0888707	0	0.0809898
ENSMUSG00000001029	Icam2	0.0251587	0.129268	0.108927	0	0.401396	0.0619982	0.0293267	0.205282	0	0.129762	0	0.0703602	0.209468	0.0739237	0.155133	0.0208695	0.0231098	0.0733067	0.081059	0.229102	0.101292	0.0613018	0.140022	0.193189	0.28296	0.325305	0.140321	19.1516	13.5913	17.4877	22.1082	14.5062	19.7378	18.7036	15.8948	13.1553	18.1157	20.2793	15.2092	18.8057	15.4853	17.9476	17.4073	18.4501	14.438	1.16209	1.10417	0.428753
ENSMUSG00000001034	Mapk7	72.4544	67.7926	65.067	62.5999	63.7802	62.9771	66.1009	62.6134	51.8306	43.9576	46.2427	49.4867	49.3809	49.0679	50.0231	51.5401	50.4683	55.1804	44.4039	43.6155	47.2458	49.2073	48.548	44.9884	48.8847	44.0473	46.4438	81.777	41.778	69.8484	93.612	83.8545	85.0666	89.4584	90.8504	82.6447	79.3171	82.8565	79.2693	87.122	86.1791	82.9164	81.9858	71.2544	81.3342	62.4793	64.9039	63.5324
ENSMUSG00000001036	Epn2	24.5314	24.3515	22.0284	25.5378	25.7909	25.2789	30.116	26.953	27.437	24.9563	23.5805	25.1777	26.3544	24.5727	24.815	26.9779	26.9908	26.3567	27.0247	22.9659	24.6495	25.0328	25.3351	25.9012	25.4928	27.2037	25.3063	23.014	16.1158	20.52	19.2559	19.9963	20.4211	19.0442	20.9663	19.5746	25.1872	24.7999	22.56	25.0145	22.5172	21.7747	22.9825	20.1606	21.7459	24.5099	24.3235	23.8844
ENSMUSG00000001039	B9d1	67.1496	66.5308	71.4535	60.7745	66.04	59.2561	56.5801	49.2638	53.4488	39.4438	37.3589	45.7803	43.7097	43.3074	45.7681	43.0012	39.9975	39.1315	53.3073	53.2665	49.1229	54.0248	55.4831	57.2597	53.3322	52.4244	55.3486	50.9791	68.6242	44.4244	55.1004	40.3555	47.5248	55.7503	52.2117	50.4624	40.1624	46.4537	43.1224	43.6707	36.3481	44.1673	39.1553	37.7614	46.2846	58.4263	54.7137	61.5398
ENSMUSG00000001052	Sec24b	55.8825	62.4041	56.0665	67.7189	62.2835	65.6873	58.5079	54.8707	50.7309	46.6146	50.397	48.386	45.4436	45.8627	45.0672	50.391	47.6991	47.3871	55.8244	54.1968	57.8876	47.0662	55.0604	49.0045	53.3137	50.0202	56.2136	67.0117	72.6265	52.6003	66.8435	55.1137	61.1848	65.1857	55.4316	58.5124	49.855	57.3319	52.8448	49.9074	55.2424	51.4576	53.3735	47.9632	50.6901	44.3136	43.7993	45.8331
ENSMUSG00000001053	N4bp3	11.4686	9.2807	9.79927	12.1286	12.8812	13.7229	14.3335	12.7866	9.89794	5.73505	4.82668	6.53783	7.69639	7.84264	8.36668	9.88386	8.70388	8.35849	7.75704	8.08201	7.88557	9.71462	8.36985	8.94808	6.80478	7.23635	7.47617	19.063	16.0798	15.8878	11.3834	10.0435	8.99106	9.47933	8.43748	7.18432	14.3274	14.8433	13.0637	11.2475	8.50488	9.40895	12.4553	12.67	11.7531	8.12703	7.61102	7.56032
ENSMUSG00000001054	Rmnd5b	24.0696	22.0498	21.2873	17.4063	18.9241	19.5371	20.7883	18.2	17.0275	18.3562	16.5481	17.7538	21.0226	21.9398	19.9196	20.1064	21.0139	18.9688	16.4942	18.9853	17.259	17.3459	16.1633	16.0003	19.1683	16.8895	17.3992	15.7417	19.3008	16.2298	12.7147	15.7169	16.0463	17.1473	14.689	14.8768	20.7408	20.1459	19.6073	24.889	21.3179	22.4701	21.3678	21.2893	21.2294	28.8776	28.3776	26.8639
ENSMUSG00000001056	Nhp2	171.251	159.548	155.22	124.549	129.295	126.214	170.507	151.524	137.008	118.425	106.159	132.662	124.253	119.227	129.471	125.598	117.295	122.837	132.319	126.071	122.941	121.762	119.019	125.975	123.109	111.143	118.167	180.431	240.795	165.813	221.25	198.421	208.453	186.198	194.285	171.108	83.3857	99.7984	87.2489	99.0442	88.366	112.326	109.446	101.609	118.705	130.468	122.629	132.089
ENSMUSG00000001062	Vps9d1	24.2342	24.0024	24.7753	23.7774	22.908	28.1018	28.8903	23.8386	16.9564	19.0091	21.6509	20.8018	21.376	21.3586	18.9153	20.4463	23.6583	20.8788	24.3613	25.7384	24.6703	26.4854	21.9741	25.2825	29.058	28.4764	27.4703	23.3677	17.5074	20.5484	29.0819	18.5687	19.8892	22.9749	18.1417	18.3209	27.5443	27.5332	27.795	31.2711	26.4774	26.0436	25.4162	23.1058	26.0763	26.1119	22.7812	21.2452
ENSMUSG00000001076	C1ql4	1.55454	1.46506	1.13221	1.6169	1.03424	1.61152	0.979901	1.0457	0.555061	0.413806	0.533451	1.49097	0.0606835	0.188478	0.37221	0.0332717	0.184929	0.156294	0.159462	0.287924	0.238318	0	0.0315326	0.0678724	0.102775	0.0961752	0.110697	0.0373458	0	0	0	0.0644671	0	0.0384197	0	0	0.315432	0.326948	0.435805	0.0365587	0.0683027	0	0.0671282	0.113416	0.0654248	1.6666	1.84959	1.54504
ENSMUSG00000001082	Mfsd10	40.7202	36.3491	37.7569	45.0643	39.8837	46.3837	43.8523	43.41	30.2107	39.8995	37.7734	39.5361	39.0229	40.3286	39.7198	41.1624	38.5747	41.8407	45.6403	48.3038	52.7813	42.0079	41.9345	47.0073	51.8768	43.2047	54.2758	41.5256	36.6041	39.3534	49.5099	34.7245	33.7587	38.0346	35.077	37.5558	43.8644	44.9621	43.481	50.8403	49.3083	47.4826	49.0335	42.9321	50.8737	40.2753	36.5646	37.9973
ENSMUSG00000001089	Luzp1	53.5961	56.8268	54.7031	80.1185	86.4083	81.5354	84.6644	91.9947	93.6228	77.1706	75.8106	77.0644	76.5824	72.2289	72.5941	81.0499	74.8878	75.617	69.5862	61.6526	59.2929	66.1671	68.9441	63.3126	59.795	66.9239	57.6244	52.347	30.9469	55.9685	48.0514	49.1235	51.0694	48.3551	52.7694	50.5331	42.7564	39.6154	34.3917	33.912	39.5651	32.7738	37.7928	33.3491	35.7994	41.4953	38.9753	36.7632
ENSMUSG00000001095	Slc13a2	0.0124456	0	0	0	0	0	0	0	0	0	0	0	0	0	0	0	0	0	0	0	0	0	0	0	0	0	0	0.011577	0	0	0	0	0	0	0	0	0.0107798	0	0	0	0.0105825	0	0	0	0.0204656	0	0	0
ENSMUSG00000001098	Kctd10	53.7797	47.6941	50.5445	49.9659	51.9288	50.6875	62.3283	53.0297	49.5628	60.2483	56.5879	58.1362	59.7856	58.4735	60.9914	61.9598	60.9305	61.1822	52.8013	57.1505	57.3156	50.3841	53.7934	50.5225	52.1735	55.1752	57.5521	87.8664	73.055	90.9043	76.0866	69.2148	71.3678	80.3298	78.9313	74.6265	90.1963	86.4014	82.334	84.586	75.5992	81.3438	83.4378	77.4076	83.0235	53.928	51.7272	51.4099
ENSMUSG00000001100	Poldip2	113.629	105.564	107.615	105.083	105.871	104.126	115.793	109.826	104.698	95.1771	92.1253	103.905	101.659	103.786	104.824	103.418	106.351	98.7295	100.18	103.928	96.5547	98.9701	100.498	103.464	102.569	106.621	105.788	127.654	130.328	124.854	126.474	128.362	130.601	129.175	120.664	115.854	116.967	128.573	107.502	126.05	115.932	126.507	123.616	109.895	123.221	101.716	100.821	100.858
ENSMUSG00000001103	Sebox	0	0	0	0	0	0	0	0	0	0	0	0	0	0	0	0	0	0	0	0	0	0	0	0	0	0	0	0	0	0	0	0	0	0	0	0	0	0	0	0	0	0	0.0214926	0	0	0	0	0
ENSMUSG00000001105	Ift20	59.5207	51.9703	56.9451	58.7891	63.8918	60.6857	67.2704	64.7828	62.8433	59.4896	49.6061	58.6697	61.8021	61.7367	66.7837	56.8963	56.5747	64.1028	55.6692	59.9874	59.9813	55.5533	55.9148	61.2265	60.3643	60.8183	60.9169	63.4116	85.6428	67.6524	76.3576	60.9821	77.174	74.4089	74.3721	71.1598	65.3229	70.2776	60.5374	70.9688	60.9147	69.5981	70.7156	61.2453	67.815	58.7483	56.9058	53.1082
ENSMUSG00000001119	Col6a1	0.446807	0.540314	0.562098	1.1705	1.33131	1.4212	3.1745	2.77627	2.07858	0.251923	0.166467	0.143216	0.484254	0.465633	0.362645	0.770658	2.36808	2.45208	0.259184	0.584805	0.586861	2.03034	1.40699	1.0435	0.457591	0.265184	0.357831	1.11337	1.11981	0.775707	5.28682	4.77062	4.73129	3.96288	4.02215	3.71556	15.0725	12.023	10.5508	52.0026	46.9156	44.3053	36.2677	27.3787	27.7685	2.65269	2.90571	2.22802
ENSMUSG00000001120	Pcbp3	22.5097	23.8742	19.0396	16.9132	17.4205	16.7006	18.6728	16.7939	16.8215	8.48651	8.70499	9.01057	11.135	11.439	11.3255	9.82208	11.5229	9.46323	9.15775	10.1389	11.5354	11.2609	10.4577	11.3372	10.2229	11.3209	10.8069	33.1963	28.7629	30.1608	28.5358	26.8153	20.3931	31.8427	26.7302	25.3477	26.1672	24.3369	24.0254	21.7643	20.568	19.3493	20.7605	22.7792	21.5689	18.4244	16.9421	15.9958
ENSMUSG00000001123	Lgals9	0.529376	0.326936	0.48955	0.144622	0.0535788	0.15061	0.0964129	0.20475	0.188956	0.636299	0.411263	0.134057	0.187534	0.309179	0.248046	0.428553	0.303369	0.280746	1.47049	1.44454	1.50666	2.11435	2.35624	1.86565	0.771602	1.40744	1.36819	1.81012	0.838756	2.37182	1.56783	1.33738	1.77354	1.16649	0.826627	1.09197	2.74938	2.50652	2.09909	2.52829	2.1174	1.6467	2.26448	1.97758	2.15483	1.15839	1.23532	1.21851
ENSMUSG00000001127	Araf	51.185	57.901	55.604	53.6418	55.4147	63.0524	60.5311	59.2758	48.3367	50.2361	47.1528	55.7215	51.0998	50.3146	47.6251	49.5066	47.8565	46.8321	63.4062	60.8341	66.5705	59.4141	60.8341	64.4744	59.4962	55.9277	64.7712	43.9849	40.854	42.0886	41.3465	41.9457	46.2546	47.2493	43.4341	46.5897	45.4801	45.5659	38.2233	48.915	45.2868	42.4862	46.5498	41.0433	43.3436	52.8304	48.6897	48.9147
ENSMUSG00000001128	Cfp	4.62906	2.85143	4.46692	3.19682	4.69065	5.40598	4.47441	3.73827	3.99843	3.45918	3.67792	4.03109	3.93723	4.15629	2.89496	3.44374	3.50475	2.89012	4.05358	3.86876	4.68533	3.78563	3.28339	4.24708	3.60824	2.99232	4.91363	4.69466	5.38281	6.13725	6.44671	5.313	4.54351	5.08691	4.08751	4.90493	5.91807	5.68981	6.39878	6.10158	5.21942	5.18013	4.63665	4.73529	5.56269	4.12253	4.44376	4.11795
ENSMUSG00000001131	Timp1	5.99282	5.72263	5.20825	5.41354	5.71652	6.36575	6.1735	4.66727	5.46766	1.54469	1.14314	1.14884	3.69892	3.16606	4.04217	4.5111	3.60547	3.97954	1.11882	2.04621	1.25562	1.30607	1.0118	1.69112	2.33514	1.88199	2.01208	8.11015	13.2694	6.84255	16.4709	14.6874	18.2363	20.7465	16.8731	18.4371	10.3726	10.7954	8.66097	16.8289	14.2809	16.0787	18.3042	17.8102	19.0148	8.51886	8.03422	7.14452
ENSMUSG00000001134	Uxt	21.0505	21.9973	23.0514	19.1514	20.3959	21.6261	21.6282	20.7798	21.9461	20.0512	15.5168	18.5194	16.0012	18.1686	18.501	16.2273	18.149	16.6985	15.7619	16.1754	13.1327	14.5113	17.2407	16.7217	15.5369	14.9954	14.7002	20.6733	23.5073	18.5138	27.5842	19.4604	22.304	24.5548	23.0376	20.676	15.5063	14.3429	16.2138	16.7456	15.6264	17.2023	16.5407	15.6878	14.2606	19.6093	18.2071	17.2132
ENSMUSG00000001138	Cnnm3	20.2114	19.1334	17.8965	18.2403	18.7226	18.0976	24.0272	20.243	15.5502	20.2596	21.6144	23.5688	26.4173	25.0834	20.4923	22.7168	24.3033	22.7866	17.8883	19.6819	17.2115	16.9355	18.9215	17.2523	19.5046	21.4688	21.9354	14.8688	9.05547	13.291	15.8321	13.8374	12.9795	16.1959	12.4806	14.7158	18.7323	18.7525	14.5896	18.4022	17.7472	16.888	18.0576	16.7207	16.7014	20.8433	21.9117	19.9412
ENSMUSG00000001143	Lman2l	34.3276	33.4639	31.7208	28.294	27.5511	27.8135	29.5701	29.4447	27.6227	29.3952	27.0966	28.2767	29.7242	30.7889	29.276	30.5581	30.7418	27.4716	24.4837	25.663	27.1927	25.4296	25.5129	25.932	26.97	27.2446	26.7915	27.0609	23.6065	27.3683	24.2465	24.4705	25.6203	28.3469	25.7804	24.7078	30.7403	32.9332	27.8565	30.0081	28.8971	29.174	30.2649	28.9051	27.9814	42.8481	41.2469	38.496
ENSMUSG00000001150	Mcm3ap	23.061	23.0074	20.1741	22.1002	23.0373	20.6003	24.615	24.4203	20.8656	22.7038	24.2864	24.2214	22.7252	23.6718	22.6925	23.5986	25.4262	22.9107	16.4195	18.9556	20.8252	16.2993	18.96	19.9277	17.5628	18.4255	20.4338	25.737	17.4371	22.1856	24.3805	25.825	20.7257	23.5608	26.0036	21.6509	27.6323	28.3146	25.0753	24.5272	30.1154	26.3413	27.0311	22.9639	25.357	22.8109	24.1056	21.5831
ENSMUSG00000001151	Pcnt	15.0191	15.2515	13.1335	14.2418	15.2069	13.9713	15.4796	15.6183	13.507	12.629	13.3923	12.6015	11.6502	12.2639	12.0503	12.362	13.7404	12.2273	8.64472	10.3158	10.6579	8.74718	10.2105	11.2715	9.93282	9.4252	11.5585	14.4471	8.40916	12.7934	16.6652	14.4438	13.333	13.8229	15.4236	11.9382	11.5961	11.8368	11.5254	10.9841	14.5541	12.0489	11.7106	11.0947	10.768	12.1514	12.3729	11.812
ENSMUSG00000001155	Ftcd	0.0103696	0	0.00801235	0.0391632	0.175996	0	0.0124258	0	0	0.0871763	0	0.0097943	0.0397917	0.112972	0	0	0.00971117	0.019967	0	0.00866669	0.0249631	0.0272261	0.0266791	0	0	0	0.020139	0	0	0	0	0.319724	0	0	0	0	0.0833349	0.0429743	0.040321	0.0292316	0.08861	0.0278057	0.0548491	0.0285517	0.0258378	0.0173278	0.0247912	0.0702622
ENSMUSG00000001156	Mxd1	8.00279	7.88896	8.59783	8.13409	7.71276	8.57665	6.35773	6.39288	6.47061	10.1306	9.55343	10.313	10.446	9.24191	10.1391	9.6434	9.1358	9.48597	10.1912	10.0724	9.02244	9.24593	9.36238	8.95379	8.60913	8.7869	9.25337	6.34324	5.93818	6.18704	6.67576	7.04456	6.87978	6.44753	6.25412	6.92812	10.6246	9.91682	9.01394	11.2	10.3106	10.1165	11.125	9.58945	9.675	11.6551	11.7315	10.0897
ENSMUSG00000001157	Gmcl1	23.5008	24.6802	23.7262	24.3079	25.0898	23.8561	23.7871	24.334	27.3008	35.7457	35.9812	34.2024	37.6062	37.1468	37.1819	37.802	39.3235	38.3175	28.6726	29.9021	28.6559	29.9067	28.7294	28.9524	31.5397	30.6244	31.611	24.8325	27.5874	28.3365	21.9825	29.2075	26.0411	25.3593	27.4578	25.9891	42.3806	40.2799	39.4772	42.7307	41.0974	41.9856	35.4847	34.0122	35.4133	35.5371	34.2342	33.3974
ENSMUSG00000001158	Snrnp27	116.926	124.386	119.193	110.552	118.759	115.633	120.516	117.084	126.766	105.253	102.226	105.837	102.435	98.9712	117.032	98.9575	110.477	108.309	99.96	110.235	96.5632	105.899	102.917	112.92	108.61	103.322	113.377	127.912	199.25	141.508	174.258	136.521	155.567	139.204	133.991	144.41	106.238	120.948	105.216	121.372	117.266	133.491	110.989	108.603	115.541	108.012	111.539	102.858
ENSMUSG00000001166	Oas1c	1.60523	1.90876	1.8438	1.19787	2.14392	1.66498	1.37559	1.46204	1.49561	1.43031	1.16507	1.42262	2.0076	1.57101	2.02076	1.47755	1.13882	1.47896	1.28733	1.23745	1.02813	1.1644	1.3374	1.55083	1.59098	1.40898	1.42362	0.443849	0.170609	0.477338	1.25677	0.318523	0.300436	0.300451	0.346254	0.391597	0.285023	0.248781	0.392045	0.226428	0.39166	0.212521	0.697013	0.332694	0.527327	2.32367	2.01019	1.91849
ENSMUSG00000001168	Oas1h	0	0	0	0	0	0	0	0	0	0	0	0	0	0	0	0	0	0	0	0	0	0	0	0	0	0	0	0	0	0	0	0	0	0	0	0	0	0	0	0	0	0	0	0	0	0	0	0
ENSMUSG00000001173	Ocrl	18.9624	21.2594	21.1703	21.5593	21.3806	21.4088	20.7372	21.3969	21.4587	22.9326	23.484	22.1019	21.5426	20.7161	19.7043	22.3085	22.0495	19.0599	23.5327	24.6244	26.3181	21.7212	21.8379	24.0427	21.4333	23.3223	24.7212	19.2491	15.8013	18.4703	17.7593	18.0508	19.526	20.0887	18.753	18.4297	21.1727	19.6862	17.0703	22.0546	22.0834	19.663	22.1971	18.8951	19.4468	22.35	21.6171	21.796
ENSMUSG00000001175	Calm1	330.022	288.558	313.542	263.081	233.206	235.529	261.742	255.739	264.928	281.514	281.054	308.243	305.218	291.822	256.257	297.633	312.817	233.163	278.795	298.196	229.907	317.921	286.089	302.977	293.232	305.773	296.934	313.123	379.276	334.292	295.498	277.746	284.324	277.835	231.569	268.356	323.763	341.145	323.225	325.759	295.635	313.849	302.912	263.199	299.76	399.777	369.082	333.289
ENSMUSG00000001211	Agpat3	43.4544	38.4409	39.3158	31.3395	31.7315	33.6531	37.6092	32.4539	27.3481	36.1932	33.1293	35.369	34.6671	35.1577	34.1304	35.0732	35.4016	35.1509	33.1204	31.8959	31.9392	29.6156	30.5423	30.0836	32.509	31.4373	31.3223	20.7107	19.2249	17.2179	16.3348	14.0641	13.3786	14.6869	15.6885	14.8319	22.2874	25.2068	21.0335	23.1865	20.3371	22.3012	24.0703	22.3533	22.4737	51.7046	51.9908	50.3231
ENSMUSG00000001225	Slc26a3	0	0	0.0160599	0.0425414	0	0	0	0	0	0	0	0	0	0	0.0351238	0	0	0	0	0	0	0	0	0	0	0	0	0	0	0	0	0	0	0	0	0	0	0	0	0	0	0.0333016	0.00880287	0.0329784	0	0.00868257	0	0.0468388
ENSMUSG00000001227	Sema6b	0.492672	0.362582	0.505252	0.159707	0.114441	0.224363	0.19947	0.114127	0.135579	0.145521	0.066079	0.107673	0.164285	0.195269	0.0642703	0.102993	0.205795	0.142708	0.19039	0.183238	0.129352	0.250435	0.162546	0.180531	0.190782	0.196934	0.27019	1.59874	1.09103	1.32257	1.47531	1.43693	1.29217	0.755325	0.91846	0.850759	1.4301	1.45947	1.17462	3.13876	2.58528	2.64173	2.93679	2.34082	2.01692	0.748001	0.68261	0.683543
ENSMUSG00000001228	Uhrf1	207.008	223.837	210.579	221.426	235.421	216.314	274.374	261.416	227.061	168.863	173.826	174.138	201.481	197.593	207.571	214.854	189.807	187.508	186.047	177.137	192.553	205.254	220.161	203.365	212.231	199.553	186.129	251.301	179.018	237.208	275.489	253.466	240.949	250.935	276.978	247.082	179.482	183.783	165.829	180.863	183.642	188.636	182.52	154.164	184.924	169.833	152.665	143.143
ENSMUSG00000001229	Dpp9	41.6647	39.805	38.4366	32.099	33.1502	34.0314	36.7769	32.1774	27.668	32.4762	33.5438	34.5587	33.4107	36.1111	33.2995	33.6704	34.2801	31.8603	27.7516	29.5566	28.9797	28.3898	29.5698	30.386	28.9222	26.8927	30.3913	35.3947	24.765	32.078	33.4138	33.5474	31.7438	34.9294	31.5659	31.5703	33.3667	35.2793	33.4039	35.5583	34.5008	33.1156	33.3432	32.7437	31.8147	41.5764	40.8168	39.8075
ENSMUSG00000001240	Ramp2	0.641763	0.513416	0.63347	0.625394	0.323464	0.693719	1.26142	0.575875	0.483269	0.277033	0.449193	0.473181	0.445654	0.56343	0.450305	0.55567	0.560951	1.12635	1.62534	3.07369	1.6305	1.83683	1.69594	2.12356	2.86693	3.83399	3.46398	52.8268	58.9585	49.9582	44.358	48.7047	56.1092	54.0485	44.1009	48.5822	42.2538	47.5799	33.315	44.7943	40.8231	37.4763	50.8201	47.7535	44.2055	3.5001	4.74387	1.49764
ENSMUSG00000001247	Lsr	121.245	104.389	105.968	90.5572	90.0058	94.3595	110.946	93.9214	85.0521	98.1233	92.1808	107.872	102.071	100.125	104.418	103.428	103.285	97.5953	85.9017	92.5544	87.4121	85.7855	85.6898	89.0103	85.9177	88.777	93.7539	4.49361	4.28143	4.77692	4.5619	3.79104	3.34907	5.2722	6.08473	5.29591	3.11752	3.86956	3.54641	4.46775	3.83262	3.85032	6.18743	5.22294	5.92445	122.766	123.587	124.206
ENSMUSG00000001248	Gramd1a	30.235	27.6464	28.9585	32.3262	35.2075	38.238	37.4688	31.4373	28.0233	33.8309	31.9571	34.4752	32.8553	34.5166	34.103	34.9885	35.7891	34.1932	30.6598	32.946	35.3045	27.9861	29.7346	31.788	32.793	30.2342	35.8079	36.7577	31.8418	36.3414	46.1624	36.452	35.5653	38.893	33.9614	32.2834	46.6968	44.4942	38.7269	46.0586	43.3918	37.8373	42.195	43.8853	39.5188	28.3593	28.1678	27.8543
ENSMUSG00000001249	Hpn	11.0714	9.23431	10.6601	17.6847	19.2143	17.714	17.8991	15.4858	12.9819	6.88456	5.5554	8.2984	10.412	10.5003	9.88997	12.0556	10.7446	12.098	7.29255	8.31656	8.05172	9.26882	9.62358	9.51089	13.9635	12.9696	12.4073	2.93322	2.02985	1.87319	2.84995	1.67883	1.41967	0.86945	1.17088	1.32656	0.828459	0.77806	0.696288	0.506387	0.545125	0.689047	0.710562	0.820363	1.15876	11.167	11.1464	10.6897
ENSMUSG00000001260	Gabrg1	0.0121131	0.00501402	0.0186429	0	0	0	0	0	0	0.0204747	0.0227327	0.0222241	0.00908473	0	0.0110527	0	0	0.00581301	0.0442885	0.0195892	0.027342	0.00994723	0.00969328	0.00518174	0.0158494	0.00492473	0.0169817	0	0	0.0057089	0.0148295	0	0.00545558	0.0114857	0	0	0.00522772	0.0108714	0.010911	0.00546681	0.0205631	0.0109191	0.00504677	0.00565298	0	0.0150305	0.00927344	0.00937227
ENSMUSG00000001270	Ckb	91.1518	81.0453	84.3285	16.9765	15.9309	16.307	30.7335	25.1342	19.527	24.6057	23.2161	30.2575	25.9638	23.6878	20.0992	20.9214	22.4787	22.7589	32.4701	37.5463	36.7281	44.5347	49.2199	53.0916	21.0359	24.1914	27.4853	16.1807	17.7022	13.7821	13.7289	16.9467	13.6794	13.1679	12.5073	13.0565	20.6109	21.6902	17.9188	24.3078	18.4543	20.4195	22.7245	21.7806	19.4055	252.458	247.787	221.846
ENSMUSG00000001280	Sp1	48.2614	52.1854	51.229	59.3406	60.6215	60.1722	56.492	57.3522	59.3545	60.1655	64.1516	58.8335	60.2812	59.3158	58.113	62.3736	60.208	57.9224	60.1991	55.7746	58.0585	59.8006	57.2333	56.2997	55.4582	55.9698	56.323	45.7831	27.1401	49.7782	43.9061	53.083	47.9785	44.2721	44.6922	45.5428	46.3844	42.1287	36.9401	42.2266	48.6568	39.717	44.6912	38.8702	40.3428	43.8235	44.4129	40.1068
ENSMUSG00000001281	Itgb7	1.2143	1.38528	1.28548	2.94784	3.29212	2.78177	4.04819	3.55612	3.10225	1.64397	1.66673	2.0908	1.47378	1.51851	1.40762	1.56171	1.6116	1.41585	0.99336	0.989778	1.44026	1.00442	1.17472	1.2572	1.01808	0.904357	1.09168	0.258984	0.495367	0.178788	0.0681376	0.260657	0.302259	0.296499	0.313129	0.395748	0.944959	0.701494	0.522703	0.61486	0.60603	0.502571	0.622938	0.541997	0.512986	0.406146	0.401461	0.482841
ENSMUSG00000001285	Myg1	84.9071	82.6978	74.1401	73.8595	73.2621	76.9654	87.8721	75.5397	74.255	67.9966	62.6565	81.2244	81.5613	79.877	82.869	85.2784	75.0657	66.8637	68.3563	74.5771	79.3673	73.5484	76.1857	72.1658	76.4822	70.2087	80.1903	81.1354	106.57	74.6079	91.4689	84.4288	79.0387	90.2663	86.0334	79.7978	88.4949	95.3091	85.3279	109.046	87.6304	105.029	105.239	87.5512	108.166	89.0625	88.7468	87.2299
ENSMUSG00000001288	Rarg	31.3009	27.0232	31.7757	73.8852	66.7316	78.6632	81.9367	67.15	61.0225	98.3273	84.3066	89.9748	110.835	102.441	96.2682	107.406	96.5446	94.615	115.741	114.346	119.911	120.586	131.725	136.574	111.682	137.95	142.221	145.484	121.227	135.444	134.4	122.066	122.826	157.631	148.199	148.427	145.489	150.204	135.969	166.007	149.401	152.12	169.534	159.794	161.36	31.492	30.2267	28.1485
ENSMUSG00000001289	Pfdn5	267.053	245.012	245.047	241.784	288.945	263.546	270.286	265.624	270.99	194.853	175.837	225.811	232.098	223.278	232.221	226.891	227.524	229.414	223.87	244.983	253.244	180.922	241.762	251.006	210.896	233.385	251.83	273.922	404.539	285.307	364.482	308.954	306.696	302.556	267.481	272.254	236.929	267.165	226.814	282.376	234.769	268.6	263.571	237.534	261.566	244.843	230.022	227.482
ENSMUSG00000001300	Efnb2	90.2359	92.568	93.8107	120.628	119.229	118.111	87.2923	88.293	87.2482	142.062	149.698	138.732	123.853	125.21	118.731	117.808	120.229	109.953	82.5462	94.1305	87.6187	92.7156	107.381	110.816	72.3056	92.9207	88.587	83.005	63.2083	77.3902	43.2408	44.0292	43.7027	74.2895	79.9876	72.5425	135.773	124.251	114.072	44.6333	47.3999	45.1343	62.7841	58.4356	59.7498	110.286	110.226	109.572
ENSMUSG00000001305	Rrp15	70.1155	76.0849	73.4328	62.8912	67.6266	63.1946	68.0585	71.0759	77.9753	50.8531	48.4181	50.7714	52.1268	54.9033	57.6911	54.8653	53.2568	56.7686	49.3325	47.6727	43.0525	48.3107	49.5585	50.389	51.4284	49.3795	48.169	85.1714	119.396	90.9398	108.664	96.1352	104.189	96.0288	93.5732	94.7736	48.3952	50.4973	48.9834	54.6072	49.6838	52.5089	60.3659	58.6725	62.0631	59.7676	57.2584	58.6807
ENSMUSG00000001313	Rnd2	20.5337	19.7286	20.8711	11.6464	10.5209	12.8063	12.9563	11.3978	10.3771	7.85619	8.49848	8.74468	9.54496	9.7598	10.0726	9.93163	8.65533	8.44413	8.09008	9.81699	8.56818	11.1526	10.0749	10.3587	13.0969	12.131	11.9086	12.2886	15.2926	10.718	7.49392	8.48315	9.49126	16.835	17.315	15.8453	13.5524	14.1878	11.986	11.3228	9.93965	11.2972	13.6271	13.2758	13.6886	21.1621	23.687	20.8489
ENSMUSG00000001323	Srr	9.63667	11.5623	10.2893	11.2503	10.9294	12.6785	10.2435	10.1725	11.962	11.7118	11.4536	8.82949	14.0382	12.6796	12.6105	13.7823	11.6886	12.118	13.47	12.6902	12.0646	12.8167	13.1924	13.9456	12.4076	14.3974	13.3261	19.6288	9.80296	23.8358	19.2567	15.3311	18.0739	23.3743	17.8333	18.8294	26.5533	27.6139	23.7268	27.8253	26.1959	26.3939	27.1349	24.6198	24.6724	11.3104	11.9925	11.9809
ENSMUSG00000001333	Sync	0.365802	0.468969	0.359831	0.061081	0	0.0252814	0	0	0	0.0259968	0.0287461	0.0576454	0.0117017	0.0285776	0.0568001	0	0	0.0254226	0.0990834	0.0762295	0.0587724	0.0769329	0.0376925	0.0806699	0.0410528	0.0360256	0.0442682	0.210503	0	0.185656	0.018573	0.0858452	0.0967221	0	0	0	0.362436	0.388012	0.411619	0.178646	0.128933	0.0816758	0.443508	0.161215	0.252673	0.511702	0.490906	0.3998
ENSMUSG00000001334	Fndc5	2.17304	2.63005	2.17928	1.56988	1.5089	1.55893	1.31535	1.10453	1.07737	2.2632	1.7174	2.28131	2.30005	1.86033	1.90976	1.62139	1.23387	1.45861	2.88235	2.62305	2.93581	2.26001	2.55906	2.3287	1.84896	2.32635	1.90726	5.70284	6.15225	5.76175	5.6308	5.57994	4.53014	2.01101	1.80465	2.03864	5.83943	6.00041	4.90527	4.50095	3.70616	4.6797	7.05714	5.09927	3.84651	1.50403	1.70926	1.61582
ENSMUSG00000001348	Acp5	1.40585	1.17013	1.48227	0.941133	0.95968	1.74025	1.05028	0.804822	0.788615	2.62197	2.51742	2.35195	3.65974	2.84473	3.13239	3.17393	2.63978	3.06683	6.72345	6.62185	6.13738	7.14888	6.70103	7.16775	7.20365	8.37029	8.80497	15.1853	20.3863	20.6278	9.96483	8.19834	10.9564	11.6081	8.65854	12.0701	12.7891	11.1875	8.90895	11.8788	9.79545	10.079	12.7057	10.8484	10.0771	2.52646	2.40505	1.96777
ENSMUSG00000001349	Cnn1	0.0388587	0.0431335	0.0300196	0.0104044	0.102768	0.0215203	0.0310664	0.0115489	0	0.0110503	0.0122219	0.0122521	0	0.0607291	0	0.022141	0.0121515	0	0	0.0324603	0.0200209	0.0218477	0.128439	0.0801403	0.0349795	0.0546601	0.0377064	0.119395	0.264571	0.0728976	0.237263	0.240074	0.211362	0.237558	0.147313	0.108444	0.111278	0.184404	0.13995	0.1636	0.0987178	0.138996	0.131762	0.171413	0.107562	0.108303	0.139205	0.175128
ENSMUSG00000001366	Fbxo9	24.3827	22.7802	21.1397	16.1866	17.8478	19.1723	23.3823	21.752	19.6967	26.4056	22.6521	24.4828	23.1064	22.5137	22.3	28.0504	25.5827	21.5608	23.017	26.9757	23.2808	24.1663	25.2033	21.0723	24.9695	27.0791	25.3493	24.0266	29.9342	21.8235	15.5774	20.6347	21.6271	24.2084	18.8867	19.6703	27.3039	29.3097	24.8309	27.5699	26.1962	26.1396	25.8143	25.7244	25.4014	28.4946	32.3058	26.1185
ENSMUSG00000001376	Ccdc132	26.046	27.22	25.4375	25.239	26.5056	26.3511	26.7549	27.2268	32.2587	27.4014	25.5251	26.9853	28.6184	27.1221	29.5982	30.5521	27.3603	29.27	22.9968	23.1976	22.3971	25.271	23.4767	20.9323	26.6425	25.23	23.7107	29.4399	33.6983	32.9001	27.4103	30.8642	33.6404	29.1966	33.2643	31.4756	29.1015	27.8802	27.1053	31.3511	28.1773	26.9435	29.4726	23.7326	27.2737	31.363	30.5171	26.3096
ENSMUSG00000001380	Hars	75.4623	76.8461	75.7224	69.1152	74.2708	68.3005	76.4986	72.1191	68.509	67.2039	63.0116	65.2116	67.426	67.9879	67.7117	66.5651	63.8918	64.0062	58.3675	60.7568	60.1581	59.1769	62.218	65.355	61.4847	64.1022	61.9629	103.693	111.524	99.9861	110.861	97.8487	101.759	100.151	97.6836	91.005	80.7827	82.9549	78.7805	85.506	79.4638	83.1634	81.1546	78.9692	78.0117	74.2754	71.1919	68.2442
ENSMUSG00000001383	Zmat2	132.618	142.689	140.77	138.868	141.497	145.228	129.22	142.325	156.55	129.778	121.197	125.609	139.622	129.492	146.272	133.313	124.036	125.594	131.683	127.165	128.32	139.851	138.495	132.701	133.257	138.683	122.256	155.811	206.299	158.517	159.73	157.86	170.592	155.1	158.267	163.335	144.932	146.054	127.5	139.889	131.496	151.482	126.639	115.464	131.988	126.486	122.44	120.006
ENSMUSG00000001403	Ube2c	386.407	396.806	391.44	317.707	317.146	332.134	373.445	347.747	320.987	269.252	265.432	271.535	283.486	288.717	294.354	277.101	328.972	249.175	232.262	287.878	226.572	270.488	263.191	320.019	265.721	289.715	326.066	432.589	432.29	414.194	362.484	373.913	419.322	417.581	396.182	377.235	342.342	389.101	329.754	384.054	361.465	376.336	345.228	333.43	340.593	359.275	346.646	313.477
ENSMUSG00000001415	Smg5	82.8386	82.9057	83.3207	75.3318	75.2937	77.7283	86.7397	79.1244	75.8817	66.224	67.5787	73.9284	71.4529	71.1211	75.4816	71.8131	69.8771	71.8616	74.4988	67.1237	70.1197	73.2712	69.2475	71.5264	76.8052	68.9067	71.6821	92.9458	66.092	94.1094	100.697	91.0016	95.4008	93.0159	88.6888	88.325	71.4856	73.3054	66.7836	78.9753	74.6439	76.1173	68.9799	62.8229	71.6671	79.7228	73.5654	69.4807
ENSMUSG00000001416	Cct3	424.084	432.768	399.217	341.186	368.611	336.607	439.597	403.123	401.952	406.262	397.084	433.249	415.829	421.923	412.732	436.533	386.954	370.607	284.198	295.7	315.621	315.08	313.415	305.409	329.755	315.871	304.483	520.365	779.796	544.398	598.876	565.051	602.867	571.163	602.093	540.842	415.345	482.885	436.187	504.885	532.936	539.422	520.252	467.641	538.302	470.415	463.726	442.496
ENSMUSG00000001418	Glmp	96.3955	80.7347	78.5722	86.4429	87.5908	85.6798	87.5489	80.852	74.3599	94.6175	92.5411	103.151	93.1728	96.6963	100.234	98.3545	78.1583	102.708	98.3084	109.874	110.63	85.2556	92.2853	95.7349	86.4996	93.4543	96.1766	70.905	78.3027	68.465	79.0341	68.8838	63.3931	64.0663	64.4727	59.8555	114.022	107.871	87.7597	101.472	91.4187	95.0845	94.318	81.2393	83.1605	109.327	99.8622	100.076
ENSMUSG00000001419	Mef2d	20.4971	21.7003	20.2458	16.8819	15.3532	20.2617	19.2614	16.8244	14.2657	17.9249	16.7981	17.9123	19.4442	16.3905	16.7751	21.8108	20.2772	18.2927	26.4213	25.3306	25.0185	29.1845	26.5353	25.6411	25.7874	24.0955	24.9668	20.6166	9.01788	14.2584	16.1631	17.5637	17.1864	20.4	17.7178	16.1877	19.8149	20.0705	16.014	22.2924	20.3534	18.5494	24.4376	19.9476	21.956	25.3797	24.8462	24.1361
ENSMUSG00000001420	Tmem79	5.53761	5.27802	5.06459	7.64782	5.84243	6.36656	7.36021	6.56715	6.33543	20.6655	19.285	19.3102	17.4619	15.0654	14.4814	18.0838	15.7392	16.4011	20.0209	19.1459	20.485	14.9086	19.3994	16.8662	19.0499	21.883	22.1592	1.30508	4.51898	2.50769	2.09903	2.04404	1.74696	1.66446	1.71357	1.91394	1.80457	1.90536	1.98097	1.9468	1.97512	1.61918	1.81315	1.51123	1.88362	7.98995	8.18522	7.46309
ENSMUSG00000001424	Snd1	113.765	100.715	84.5644	90.3519	103.117	89.201	146.36	123.958	98.8645	127.933	118.434	136.585	124.594	137.338	120.317	132.035	115.861	120.178	87.0661	105.518	118.585	98.8035	110.042	119.04	87.9985	109.115	109.535	98.325	59.9951	102.114	146.382	102.797	103.171	114.817	163.413	102.964	127.125	109.014	100.276	111.412	96.8102	101.995	108.719	84.8593	90.5355	111.11	98.6741	97.8057
ENSMUSG00000001435	Col18a1	220.938	194.411	193.527	364.585	389.356	381.283	515.736	449.291	375.949	369.347	363.289	434.174	340.866	353.324	351.287	325.07	362.57	345.65	226.895	263.277	314.062	224.023	262.529	294.87	196.661	221.92	263.081	31.5838	22.4064	30.2519	35.6743	34.7444	28.9638	37.6486	44.999	36.618	35.0108	34.5702	28.664	33.5627	34.2364	30.4001	37.5148	36.3825	34.8306	149.28	153.181	154.474
ENSMUSG00000001436	Slc19a1	20.8359	22.4695	20.9449	13.7477	14.2546	16.7215	17.2369	17.0693	13.4928	12.7468	12.248	13.3917	16.0085	15.9847	16.4261	17.3063	17.2901	14.8985	13.2918	14.198	15.0109	14.7149	17.1304	15.9424	16.6295	17.587	14.8303	27.7667	17.6804	27.2467	30.0233	26.2821	26.0042	24.6288	24.2545	21.8544	18.0231	20.3362	15.7742	19.011	19.8889	18.5506	20.6608	19.0274	22.1657	18.4873	19.1481	19.5335
ENSMUSG00000001440	Kpnb1	431.655	469.185	434.102	350.717	393.906	337.199	341.934	376.337	396.896	288.839	290.908	287.595	277.139	275.793	290.811	267.775	260.863	274.953	273.927	273.451	283.788	275.919	294.198	289.948	286.413	292.192	285.304	481.288	446.702	474.471	538.569	537.112	526.283	471.504	526.343	491.194	313.398	315.022	304.672	294.329	316.587	306.728	310.857	292.558	313.925	330.198	332.793	319.719
ENSMUSG00000001441	Npepps	66.6856	72.9437	68.6666	64.463	68.1991	62.6433	64.4993	67.1801	67.1037	66.7189	72.456	70.4286	67.3498	68.4329	69.527	66.5055	72.1684	70.4334	65.9167	68.8699	75.1469	66.3928	67.1598	70.1128	73.3968	67.6015	75.223	46.0302	37.7221	44.9017	45.7488	48.0464	46.1941	49.4948	53.2765	50.0525	49.6222	46.4736	44.5631	53.6352	59.7475	55.22	53.5797	52.474	52.5227	74.8483	78.7684	71.8749
ENSMUSG00000001444	Tbx21	0.120366	0.139727	0.0648104	0.0283471	0.0207427	0.0389074	0.0698877	0.0103615	0.0208856	0.0102144	0	0	0	0.0111678	0	0	0.0109579	0	0	0.00971987	0	0	0	0	0	0.00976821	0	0.033586	0	0.0909279	0	0.165103	0.261444	0.045784	0.13551	0.149201	0.0521159	0.0649912	0.0543193	0.217902	0.255837	0.217234	0.0803862	0.18026	0.138555	0.19952	0.120007	0.121111
ENSMUSG00000001445	Mrpl10	81.1051	85.0614	82.1822	83.3257	76.2139	85.2791	88.8961	83.6957	81.6504	71.3864	67.142	75.2716	79.9239	77.3015	77.5092	78.6438	75.8681	70.5371	71.5788	71.634	73.7467	74.7528	73.731	73.925	72.623	77.0324	79.0328	74.7085	85.2636	76.7127	80.8585	75.1823	73.8683	81.3588	76.8085	78.1181	72.4295	75.2885	63.5408	81.3245	74.509	76.0536	82.1357	74.0001	81.14	78.5035	78.4212	75.8912
ENSMUSG00000001467	Cyp51	82.8263	90.8736	91.8697	79.1	82.7103	80.1486	79.3458	85.7728	90.4534	59.7953	59.7748	63.6003	62.1	60.5875	65.1515	63.2127	63.1627	64.9418	41.7242	42.4393	41.7081	48.1947	47.6014	47.7922	55.5432	52.7958	50.0743	80.4018	82.0012	85.8492	78.4207	91.8693	94.0987	79.2219	94.2059	85.3883	95.8067	88.0286	90.5793	96.2781	83.9471	97.503	84.0626	70.338	76.1774	87.7388	82.9752	86.1054
ENSMUSG00000001473	Tubb6	10.9374	10.3596	10.8597	42.1922	40.6222	38.9745	53.8798	49.0723	40.0788	2.48941	2.63296	3.61166	5.75275	7.3999	8.86618	8.56782	10.4813	11.1331	2.11143	2.20314	2.24639	2.75167	3.31884	2.60159	2.4361	2.67878	2.43655	54.1501	60.9457	49.2226	55.8335	48.2524	44.7131	56.245	48.7477	47.8406	23.8877	27.2109	22.9817	34.0721	31.7383	34.3525	36.1362	33.4574	35.9297	2.85757	3.31358	2.40096
ENSMUSG00000001493	Meox1	0.732321	0.674968	0.698843	0.553407	0.479196	0.515098	0.488414	0.420631	0.470714	0.138246	0.102221	0.124935	0.346949	0.365274	0.385558	0.10075	0.222461	0.104615	0.142752	0.142319	0.183393	0.277638	0.248964	0.173851	0.141487	0.275008	0.0885347	4.35345	4.039	3.92042	0.713055	0.777	0.774171	1.74226	1.68333	1.83885	2.63278	3.22413	2.82895	1.74436	1.30343	1.13843	14.7473	10.5051	7.35863	0.843399	1.3111	0.997257
ENSMUSG00000001494	Sost	0.89815	0.87965	0.803968	1.91755	1.54835	2.16564	2.53248	2.83073	2.74729	0.0625892	0.0555261	0.135731	0.0554229	0.27372	0.418932	0.158077	0.161145	0.184702	0.0714945	0	0.088473	0.0120521	0.0117476	0	0.0511782	0.0238772	0	0.534469	0.421859	0.389612	0.162005	0.344598	0.253724	0.322449	0.166437	0.25574	0.510755	0.397987	0.266026	0.427019	0.43846	0.319033	0.356752	0.26218	0.351017	1.02594	1.14143	1.19678
ENSMUSG00000001496	Nkx2-1	0	0	0	0	0.0348248	0.0108849	0.062592	0.0464173	0.151943	0.297484	0.241179	0.136489	0.324315	0.237574	0.247046	0.100063	0.122744	0.0259746	0.381691	0.347951	0.404695	0.308858	0.472973	0.402736	0.22241	0.240374	0.364269	0	0	0	0	0	0	0	0	0	0	0	0	0	0	0	0.0112492	0	0	0	0	0
ENSMUSG00000001497	Pax9	0.305966	0.488619	0.710164	0.777208	0.895778	0.721889	1.70826	1.71913	1.84926	0.344833	0.251279	0.181125	0.543899	0.756158	0.648711	6.42738	7.19832	3.9014	0.372535	1.96757	1.04608	0.234526	0.256293	0.394774	1.36334	2.45027	1.84237	22.807	19.561	21.9462	7.61411	8.39045	9.04703	2.50181	2.50486	3.07954	78.3574	76.9158	62.8696	18.7889	19.5835	18.0483	23.618	19.6818	20.5804	3.22768	4.87397	1.15157
ENSMUSG00000001504	Irx2	5.49601	6.95079	7.61014	32.6608	25.2094	29.4201	42.3799	47.8508	54.6082	12.5843	11.5683	13.7142	30.6478	21.6196	22.0356	51.8409	52.7596	59.8149	32.2515	32.7759	32.8623	119.141	177.639	126.476	63.7973	104.76	87.8976	0.650111	1.74788	1.10107	1.24614	3.50173	2.4778	1.93388	2.47945	1.91996	0.72727	0.645598	0.378486	1.49092	0.710151	0.738311	7.19958	8.29152	6.06364	3.25045	2.38118	2.9517
ENSMUSG00000001506	Col1a1	0.162824	0.505209	0.459533	0.262128	0.130444	0.184414	0.283342	0.254024	0.154026	0.636823	0.384935	0.254851	0.464672	0.936806	0.622547	1.71817	4.6808	3.29071	0.681097	1.30041	1.72176	2.34321	1.19423	1.06522	1.58467	0.697149	0.806055	10.1676	6.87537	8.06687	10.8375	7.28449	7.08191	9.37	8.61564	9.03927	58.8504	53.1804	42.8621	93.5596	105.87	86.9217	101.084	68.3819	70.7076	1.33337	1.54931	0.619028
ENSMUSG00000001507	Itga3	61.7862	55.8069	55.4953	109.994	112.289	112.491	147.685	135.074	110.23	83.4655	87.0281	93.4391	81.8949	83.6546	82.3068	85.1679	97.6428	83.7307	68.9275	79.1104	90.0557	77.7499	79.3187	90.2546	65.7181	67.903	80.8539	2.42153	2.25743	3.89714	1.17554	1.47082	1.16173	1.47833	1.65665	1.38885	2.01531	1.69526	1.60582	0.793012	0.880291	0.579683	1.27206	1.33335	1.33002	32.9879	33.4783	34.0609
ENSMUSG00000001508	Sgca	0.0444432	0	0	0	0	0.256855	0.57616	0	0	0	0.0210337	0.0578044	0.0167817	0.0616442	0.159752	0	0	0	0	0.122185	0	0	0.0353696	0.0524139	0.0192437	0.0510441	0	0	0.198647	0	0	0.259651	0	0.0620274	0.130499	0.106831	0.0193465	0.0200861	0	0.0202081	0.11057	0.0195129	0.638907	0.365371	0.398611	0	0	0.0497555
ENSMUSG00000001510	Dlx3	58.8403	57.6879	56.1169	64.9474	62.115	72.3175	67.539	66.0366	55.5364	209.243	208.232	295.505	109.147	108.628	138.384	75.5531	79.5651	85.8916	227.331	165.342	210.288	118.232	88.0233	95.2554	95.7962	77.3793	88.3023	0.721069	0.325576	0.646123	2.02568	2.51272	2.39055	57.5639	53.1323	54.3948	2.31618	2.40959	2.63955	1.61117	1.40391	1.3783	30.393	29.3329	30.5436	54.626	49.8299	58.8575
ENSMUSG00000001517	Foxm1	100.669	98.4926	96.4249	81.6083	85.7497	88.7686	99.6515	94.2378	92.4331	58.1411	65.3018	68.3618	61.3158	63.9649	61.9362	63.3127	65.785	61.3485	65.803	59.1948	59.9769	70.9392	70.8268	65.6847	74.8021	69.8578	66.8373	123.264	66.8053	103.873	121.756	110.857	111.267	116.274	93.249	104.191	85.057	84.4352	74.9961	92.494	103.504	86.8148	80.1667	73.3328	83.3	69.3073	70.1659	67.6969
ENSMUSG00000001518	Itfg2	17.0511	16.5142	16.9254	17.9975	18.4358	19.0485	19.2489	19.5965	15.7654	15.6115	15.1728	15.5586	16.6352	16.538	17.8195	18.7657	18.628	17.944	13.6806	14.5881	15.9926	14.8595	15.1477	15.4555	16.2207	14.8285	16.5837	18.4032	17.0156	15.0531	16.0756	17.3559	15.3266	17.6272	16.0669	15.3781	18.4041	19.2137	18.5009	20.1391	19.8151	20.5798	19.3823	19.0428	19.3958	17.6867	17.4573	18.7262
ENSMUSG00000001520	Nrip2	0.175643	0.0740195	0.0638613	0.226396	0.222766	0.212019	0.326594	0.15843	0.0886438	0.127241	0.224099	0.312796	0.480023	0.570712	0.42199	0.471074	0.549007	0.423313	0.346733	0.593576	0.620356	1.09721	1.29204	1.16448	0.65401	0.965574	1.06235	0.0152565	0.156239	0.0413298	0.0403631	0.114408	0.140401	0.144745	0.406816	0.159873	0.64231	0.533821	0.386007	0.683989	0.371792	0.478146	0.75784	0.771642	0.473887	0.280882	0.357113	0.360061
ENSMUSG00000001521	Tulp3	38.4228	38.3095	39.0451	51.8075	55.6437	54.6523	61.9894	57.8114	58.3917	55.6622	53.0388	54.1365	62.2504	59.7784	60.847	64.4334	62.3795	60.2778	50.2509	52.8479	50.5859	54.936	54.2995	53.1756	54.0518	54.4328	55.3295	37.2529	32.7598	39.7845	40.477	36.1062	37.4413	38.0248	36.827	37.6976	43.1766	42.3083	37.8866	41.7788	41.1302	38.7251	42.3099	38.559	39.7916	38.6461	40.3997	38.2571
ENSMUSG00000001524	Gtf2h4	40.2482	36.8918	36.0324	32.9206	30.9554	32.2811	39.2592	34.1434	30.1085	27.4287	24.087	27.4005	28.9659	29.4059	32.2608	27.2772	28.4448	29.4765	22.8007	22.798	23.2562	21.9384	22.4682	21.7012	26.3599	22.0227	25.7882	38.5967	50.7348	42.552	43.0185	41.3893	35.2124	38.1315	38.786	36.6921	36.4718	42.6531	36.9772	41.6437	35.914	41.8805	39.1611	39.8394	41.112	35.1453	37.4038	36.1942
ENSMUSG00000001525	Tubb5	2359.47	2230.86	2223.7	2112.49	2067.9	2008.71	2279.92	2051.87	1868.2	1936.95	1939.07	2063.9	1938.92	1921.04	2040.12	1820.42	1767.44	1774.22	1743.36	1807.2	1974.2	1954.72	1965.79	2047.51	1774.99	1766.59	1866.93	2506.46	2520.57	2331.63	2371.59	2342.31	2207.52	2487.23	2391.82	2379.37	2438.83	2674.51	2486.82	2659.59	2634.18	2767.91	2443.7	2335.96	2594.9	2067.91	2050.74	2049.01
ENSMUSG00000001542	Ell2	19.811	23.281	22.2822	9.60947	8.79861	9.34861	4.53519	4.45879	5.37113	19.9018	17.4183	18.1255	14.4247	12.5021	12.064	13.3328	11.2516	12.7483	16.6455	15.5527	16.1597	13.8687	14.4935	12.6093	12.3134	13.5645	12.2068	6.24309	5.57638	8.89612	6.53788	4.63902	5.99963	5.95604	5.68154	6.45551	4.20533	3.60955	2.99494	3.77727	3.42413	3.25942	4.74289	3.91936	4.0904	26.4426	24.6738	22.8517
ENSMUSG00000001552	Jup	57.2052	53.1557	49.8517	75.7969	70.5082	77.1043	68.0759	66.1806	53.7062	163.018	162.115	170.615	144.386	139.085	128.067	152.708	157.49	139.042	178.491	202.81	203.462	178.979	199.618	215.481	185.202	210.174	231.816	18.8611	14.173	19.6763	15.2714	14.3436	16.038	12.5096	12.306	11.0435	28.4594	27.5764	25.0402	23.4595	21.7822	22.1646	21.7715	21.0158	17.6717	89.8464	84.9045	85.1687
ENSMUSG00000001555	Fkbp10	32.0303	28.1548	28.1987	38.5546	41.8497	40.0407	43.2241	36.4793	33.004	27.3247	26.3342	31.5234	29.753	31.3087	32.6854	26.5501	26.9114	29.9713	20.5556	21.106	23.9383	14.0498	13.1309	15.8279	18.7446	16.1027	17.7262	36.8152	42.421	38.3536	57.719	46.6832	49.8067	53.1801	54.1432	48.6135	79.4001	77.0758	61.4353	67.657	62.248	67.0885	77.2889	66.218	74.546	27.6325	29.8379	27.003
ENSMUSG00000001558	Klhl10	0.8791	0.956642	0.679832	0.969582	0.963026	0.70298	0.888416	0.509493	0.766081	0.686765	0.50994	0.628178	0.937696	0.6663	0.71536	0.863766	0.637679	0.670165	0.690487	0.733987	1.08145	0.779721	0.972248	0.678192	1.07601	0.737042	0.957164	0.72767	1.21517	0.854086	0.376514	0.942021	0.686366	1.12268	0.836184	0.762383	0.86522	0.93419	0.833625	0.961167	1.16879	1.20964	1.23542	0.817082	0.975757	0.580742	0.817491	0.758716
ENSMUSG00000001566	Mnx1	0	0.012536	0.0348537	0.0118506	0	0	0	0.0390813	0.0262222	0	0.0284913	0.0139287	0	0	0.0277383	0	0	0	0	0	0	0.0247277	0	0.0129076	0.0131246	0.0367433	0.0281657	0	0.195432	0	0	0	0	0	0	0	0	0	0.0272982	0	0	0	0.0631181	0.0377932	0.0331738	0.0125324	0.0115962	0.0312334
ENSMUSG00000001569	Nom1	28.2541	32.3183	29.5638	24.9678	28.3384	25.7266	38.1568	33.1309	32.3458	30.1333	27.862	29.7325	31.1022	31.1594	34.8828	36.4886	31.6096	34.7835	22.0908	18.8477	22.6954	21.706	21.5717	19.77	28.2425	23.5573	20.4201	26.5586	32.7119	35.7214	40.5374	34.4778	39.3922	27.7395	32.7564	34.9268	25.7536	28.1144	23.1173	28.1416	25.0142	24.3034	30.2617	24.7102	28.4505	30.6525	28.5458	29.0711
ENSMUSG00000001576	Ergic1	153.058	160.181	154.625	148.512	149.379	158.174	163.332	155.432	134.126	149.312	150.172	158.258	157.619	155.457	155.784	154.017	148.295	134.316	141.054	146.093	148.747	137.515	138.174	135.338	134.45	143.133	144.1	144.558	109.564	136.377	127.076	138.729	136.378	134.875	144.707	128.694	144.877	153.678	126.848	143.338	145.369	141.732	147.794	132.987	137.82	150.008	149.497	146.388
ENSMUSG00000001583	Tnk1	10.5661	11.1474	9.48873	11.6058	10.737	13.0594	10.2413	10.4375	8.37546	9.30343	9.61874	10.9985	8.9005	10.1243	9.67182	11.5756	11.1764	10.575	9.44533	10.46	10.7333	11.1815	12.895	12.5975	10.7691	10.4807	11.6653	0.19065	0.321858	0.0346691	0.243135	0.129431	0.0221538	0.0203277	0.157068	0.128272	0.18846	0.0660824	0.0771909	0.0386998	0.0454498	0.0949421	0.0677188	0.0400174	0.0527889	12.3216	12.2543	12.5519
ENSMUSG00000001588	Acap1	0.170897	0.0500476	0.231396	0.0805978	0.153998	0.106998	0.170917	0.122724	0.23846	0.215499	0.14184	0.132547	0.0987099	0.317686	0.201577	0.0977977	0.246416	0.181179	0.136397	0.0707705	0.072742	0.152969	0.246595	0.237137	0.148951	0.127316	0.0788182	0.528515	0.423201	0.515071	0.147635	0.400412	0.506721	0.460241	0.748889	0.725531	0.724601	0.739291	0.562279	0.504223	0.551801	0.448712	0.791807	0.693618	0.626167	0.0880765	0.169837	0.166056
ENSMUSG00000001604	Tcea3	3.19101	3.1229	3.36978	1.86944	1.50828	1.91285	1.14099	0.972928	0.959188	1.74528	1.65572	1.45599	1.22531	0.721873	1.2175	1.16059	0.976083	1.51587	2.85295	2.85559	3.71178	2.74278	3.2557	3.0878	1.9626	2.29049	1.91556	0.109788	0	0.0248675	0	0	0.329064	0.306981	0.15555	0.135086	0.36578	0.287346	0.154125	0.178237	0.0687453	0.0473622	0.854367	0.585291	0.328724	1.44177	1.6082	1.75126
ENSMUSG00000001622	Csn3	0.557515	0.875124	0.698793	0.362086	0.0924307	0.318598	0	0.0906084	0.124663	0	0	0	0.0202808	0	0	0	0	0	0	0	0.0411002	0	0	0	0.0310823	0.0292116	0	2.61567	2.10511	2.87391	5.00842	5.47971	5.23492	10.1895	9.48576	7.81465	0.212076	0.250474	0.116389	0.0597457	0.089061	0.0938583	0.267606	0.123887	0.198364	0.13244	0.296112	0.206228
ENSMUSG00000001627	Ifrd1	69.9776	79.2764	74.0626	62.6834	64.9342	63.2263	66.5558	73.2531	84.8197	53.5292	48.6121	65.2694	50.8907	53.3478	57.1843	51.3137	52.9157	59.6804	50.0434	46.8219	48.3662	43.071	42.2453	42.8055	53.763	44.3218	47.3993	103.176	157.907	117.978	134.705	132.595	155.485	96.0878	90.5824	102.571	83.2868	80.815	83.517	82.7306	83.033	84.721	85.0326	76.9975	80.7832	76.2281	73.9127	69.9582
ENSMUSG00000001630	Stk38l	8.99943	10.8571	9.32423	9.72352	11.8262	10.603	10.3182	11.338	12.2028	11.1237	11.2501	12.655	11.6398	13.2353	11.98	13.5142	12.7309	12.4669	9.79228	9.58206	9.23062	9.75575	8.99282	8.36336	12.8135	11.259	10.0023	13.6829	10.96	14.2813	12.3092	11.2641	14.1634	12.7282	13.5083	13.1351	11.1302	10.5888	9.64117	10.3266	9.41182	10.2632	11.1047	10.1141	10.8124	10.2953	9.58606	9.17016
ENSMUSG00000001632	Brpf1	29.8548	31.0288	29.5034	29.5586	28.7787	30.3314	32.1913	30.8541	27.9894	29.9654	28.3749	33.0002	30.4701	28.8054	30.3822	32.3594	29.6454	29.5133	34.6832	31.7635	34.8336	34.2974	31.6686	32.9009	33.2846	30.683	33.0319	29.756	20.3898	26.8798	31.7523	29.4047	30.1979	28.3061	29.2141	28.4679	29.6129	27.958	25.5237	32.0565	28.9304	28.3417	30.9231	25.7349	29.2799	34.1646	31.1945	30.7996
ENSMUSG00000001642	Akr1b3	39.9339	49.736	44.8781	27.9535	33.775	34.176	38.1792	39.6144	28.0719	38.7552	33.2142	38.135	46.875	40.912	40.6978	34.2015	40.0489	30.8708	25.717	27.4439	28.2946	30.6937	25.979	30.7851	26.4254	28.2321	27.4163	58.119	61.7571	57.4699	49.2471	61.524	64.215	78.6553	71.4866	54.5626	46.9383	55.0294	51.2722	55.9085	53.4804	52.3156	54.2231	57.3232	54.5074	44.0428	43.8938	39.4401
ENSMUSG00000001655	Hoxc13	0.0372769	0.0206861	0.067197	0.119785	0.0657187	0.165152	0.789625	1.37337	1.10904	7.79957	7.07976	10.7981	2.08075	1.72383	2.97451	2.59067	2.59856	3.2338	11.0612	9.11432	8.24016	5.76466	5.31951	4.85465	4.02756	3.31444	4.20854	0	0	0	0	0	0	0	0	0	0	0	0	0	0	0	0	0	0.0103187	0.103878	0.162129	0.214668
ENSMUSG00000001656	Hoxc11	0	0	0	0	0	0	0	0	0	0	0	0	0	0	0	0	0	0	0.0256927	0.0128491	0.0356638	0.0129673	0	0	0	0	0.0447701	0	0	0	0	0	0	0	0	0	0	0	0	0	0	0	0	0	0	0	0	0
ENSMUSG00000001657	Hoxc8	0	0	0	0	0	0.0139412	0	0	0	0	0	0	0	0	0	0	0	0	0.0139988	0	0.012959	0	0.0276988	0	0.150819	0.0258496	0.201313	0	0	0	0	0	0.0125829	0	0	0	0	0	0	0	0	0	0	0	0	0	0	0
ENSMUSG00000001661	Hoxc6	0	0	0	0	0	0.0167919	0	0	0	0	0	0	0	0	0	0	0	0	0	0	0	0.0339992	0	0	0.181375	0.187207	0.514595	0	0	0	0	0	0	0	0	0	0	0.0180405	0	0	0	0	0	0.0357478	0	0	0	0
ENSMUSG00000001663	Gstt1	1.25677	1.50006	1.09219	1.4615	1.13755	1.25103	18.1814	16.3155	14.0063	1.57801	1.10748	2.10256	1.76524	2.3365	2.03779	8.02353	8.41327	10.7634	0.674559	0.805429	0.687637	0.967105	0.768898	0.964014	3.08599	2.1762	2.45829	1.42023	1.32906	1.16669	0.393965	0.966334	0.535029	1.26563	0.90696	1.94302	7.66064	7.64922	5.80334	5.04239	4.00286	5.26824	3.95997	3.47758	3.23384	1.8062	1.77042	1.9282
ENSMUSG00000001665	Gstt3	6.60175	6.6526	6.6435	4.84351	4.40914	4.96539	7.73205	8.32343	6.96633	8.13009	8.02679	8.81116	9.49605	9.67517	8.59423	9.86291	10.0562	9.89437	6.26799	5.68593	6.64225	7.02304	7.39531	7.20963	7.54332	10.3207	8.17139	0.623566	0.392028	0.935639	0.997998	0.461344	0.370759	0.968395	1.06555	0.851303	2.46992	2.38935	2.1698	2.04622	1.88711	1.66251	2.56474	1.83188	1.93485	9.32252	8.52226	7.51367
ENSMUSG00000001666	Ddt	117.935	108.336	110.941	112.084	102.22	104.067	113.945	115.534	114.147	83.3573	71.8212	87.7114	94.8562	90.2915	102.437	78.74	77.2364	89.6429	73.0461	71.1564	78.2916	76.9763	76.4926	76.9635	68.938	76.4151	68.8158	105.362	136.021	108.696	100.379	96.8664	101.532	99.4702	96.7325	100.38	115.045	123.691	113.718	101.453	83.916	108.766	90.7139	86.7482	103.398	98.8375	102.583	101.425
ENSMUSG00000001670	Tat	0	0	0	0	0	0	0	0	0	0	0	0	0	0.0468368	0	0	0	0	0.01079	0	0.00997864	0	0	0.0114122	0	0.0217947	0	0	0	0	0	0	0	0	0	0	0	0	0	0	0	0	0	0	0	0.0107957	0	0
ENSMUSG00000001672	Marveld3	9.01758	6.98332	7.49831	6.63589	6.31651	6.08759	5.04543	5.34108	5.95209	10.9428	11.5772	10.2517	7.7383	7.96735	8.09439	7.66037	8.02845	7.00066	10.4111	12.4539	12.4114	9.66925	8.85092	9.14791	8.14101	9.0359	9.42668	0.0341942	0	0.0115719	0	0.0494385	0.0440662	0	0.0230002	0	0.0212252	0.0110285	0.0660953	0.0221858	0.0104188	0.0671359	0.0204607	0.0114708	0.0503763	7.80612	8.81859	8.11662
ENSMUSG00000001674	Ddx18	73.2377	83.334	79.5123	63.367	71.6102	64.4382	71.6583	78.604	75.1847	65.5384	72.0927	68.223	70.1553	72.1427	68.5136	64.2506	69.8901	63.2222	54.7758	54.7779	55.2715	56.0817	54.1721	56.8111	57.4448	57.0502	52.0997	101.376	111.657	102.614	106.876	107.982	101.322	92.0432	86.6463	88.4269	61.4616	57.7111	63.9055	64.7976	64.9116	65.0042	66.9109	59.9511	61.3802	73.7351	63.9526	67.3624
ENSMUSG00000001687	Ubl3	29.5727	26.9205	27.7787	34.2647	33.9056	33.9924	33.4915	31.218	31.2718	37.0454	31.5305	34.6157	37.2564	38.5385	37.2932	35.8739	37.7875	36.5233	40.1457	43.7027	42.8205	34.7428	34.1413	33.9161	31.5352	33.3462	35.9696	25.9975	26.4188	26.1021	27.657	27.9362	27.572	26.8174	26.0624	24.9728	28.0128	29.3071	25.4025	31.101	27.7254	29.4401	30.793	29.9057	27.5213	38.6697	37.2643	36.0072
ENSMUSG00000001700	Gramd3	18.1763	19.7381	18.134	18.0511	15.5982	16.9339	16.9407	17.8715	18.3188	30.8206	29.7279	30.8478	27.1253	26.3827	27.6736	26.4999	25.9228	26.1954	32.5262	30.9899	31.1553	29.0842	27.2683	28.3129	26.519	26.8538	27.6278	15.1873	16.303	14.7745	13.7488	12.9036	12.4497	13.3288	12.8823	13.5879	15.8454	16.2678	14.2576	12.7946	10.7854	11.8506	13.233	12.3696	12.4061	21.9329	21.4015	21.7835
ENSMUSG00000001707	Eef1e1	94.5882	99.4816	110.727	114.04	108.69	115.942	106.734	116.224	130.476	135.659	120.752	125.1	139.836	131.908	137.345	129.394	122.974	124.866	135.61	125.556	119.767	126.106	116.387	124.277	126.623	135.164	126.068	100.153	134.438	116.276	89.5137	119.922	135.456	101.115	102.58	103.764	64.3021	64.6884	67.4729	76.3503	63.1723	77.427	66.9317	71.9795	74.6763	94.8281	91.7015	88.2082
ENSMUSG00000001729	Akt1	193.775	172.727	177.091	182.611	186.059	191.156	213.105	184.75	170.24	200.574	188.906	209.146	188.865	189.073	197.926	197.012	189.186	190.689	191.381	193.974	189.573	187.725	188.722	185.311	184.414	184.156	185.676	217.938	192.426	214.331	243.741	217.192	216.668	216.862	221.409	208.834	206.959	224.182	197.286	209.493	200.392	205.012	209.808	201.738	209.706	183.133	175.815	174.464
ENSMUSG00000001739	Cldn15	0.365124	0.260448	0.215996	0.281358	0.18862	0.300691	0.366558	0.212193	0.21203	0.279033	0.336736	0.374227	0.391636	0.355613	0.445533	0.217814	0.351012	0.393439	0.340412	0.357089	0.520912	0.324099	0.380297	0.501481	0.518256	0.35744	0.430596	0.349063	0.31413	0.159265	1.01423	0.191402	0.339298	0.0984114	0.250742	0.381609	0.321276	0.293216	0.234103	0.490581	0.230064	0.264966	0.273515	0.329658	0.387262	0.23409	0.318158	0.30574
ENSMUSG00000001741	Il16	0.0370229	0.0462018	0.00712018	0.0355295	0.079736	0.0224357	0.0322156	0.020984	0.010145	0.0470325	0.0609186	0.0170087	0.0417501	0.0342283	0.0507771	0.129926	0.185177	0.124807	0.0185711	0.0299124	0.0417794	0.0303636	0.0147956	0.0395719	0.0323848	0.0181136	0.00864173	1.21305	1.23606	1.05268	0.724622	0.918022	0.960919	0.864593	0.877448	1.01422	2.22487	2.07175	2.35278	2.04794	1.83019	1.62729	2.41763	2.3238	2.00691	0.0843	0.151095	0.064458
ENSMUSG00000001750	Tcirg1	14.6566	14.5696	11.4167	10.5948	12.6329	11.0609	6.94518	5.9837	6.92225	8.29305	6.87017	9.52164	9.78776	11.5037	8.63824	7.9912	11.2026	10.1405	14.6821	14.7656	17.8283	16.7403	15.0692	20.0393	16.2115	12.8385	19.57	11.3676	5.8688	8.54609	12.6749	13.2389	10.9548	15.998	9.9362	12.2215	19.0794	19.8892	16.2655	17.8879	19.0842	14.8019	18.0055	22.0874	18.2098	11.9016	12.3969	13.6944
ENSMUSG00000001751	Naglu	4.50247	4.17305	4.15585	2.21422	2.81438	2.48322	3.10636	2.57512	2.05146	2.29486	2.72954	2.17482	2.01993	2.18701	1.97519	2.30965	2.86124	2.28757	1.97149	2.59177	3.31645	1.46707	1.31917	1.66081	2.8049	2.58411	3.05174	2.34866	1.81464	2.0884	1.68734	1.67942	1.53191	1.79256	1.95916	1.88473	2.69827	3.21738	1.88026	2.57909	2.52248	1.95924	2.58372	2.26378	2.5221	6.12452	6.33915	5.14496
ENSMUSG00000001755	Coasy	48.2884	42.7047	41.479	38.969	37.7735	36.4659	45.8748	37.7911	35.3387	40.2216	37.6973	38.9465	43.2831	41.139	43.0262	42.2419	38.8418	40.6735	39.6798	39.1278	39.8845	38.3471	40.2133	38.9825	40.6417	42.1656	40.5014	35.1195	28.0372	32.422	36.5507	35.1376	32.3864	34.1125	37.421	32.7437	31.5527	34.9794	27.2439	33.0119	31.8151	33.1387	30.9376	30.3471	29.9438	45.731	47.1012	43.2448
ENSMUSG00000001761	Smo	134.881	130.922	134.205	122.357	126.437	131.026	140.636	141.298	122.022	135.572	141.164	150.549	142.526	147.602	150.264	141.047	143.175	141.311	105.697	107.983	98.7631	113.78	107.986	103.566	110.371	112.25	102.674	129.121	90.8659	124.645	129.036	124.376	131.397	141.726	142.372	127.478	149.102	153.918	127.013	149.024	151.513	145.411	150.5	140.057	141.267	125.239	128.823	125.304
ENSMUSG00000001763	Tspan33	10.3609	10.1832	10.6007	3.24366	3.67306	3.87425	4.48131	4.82656	4.74672	2.55413	2.97135	2.75383	1.99252	2.35696	1.70996	2.58998	2.8636	2.27804	1.68381	1.70375	1.61005	1.39845	1.25089	1.42436	2.30429	1.59462	1.56282	6.58222	7.98476	7.58097	3.1117	3.07724	5.05625	4.2265	3.45896	4.13327	5.949	5.04225	3.74382	5.67806	4.21972	3.68385	6.25166	5.30936	4.76615	10.8129	10.1424	10.5292
ENSMUSG00000001767	Crnkl1	37.0672	43.0813	40.9867	36.734	38.3856	36.4695	36.5535	41.1357	44.7159	37.0394	34.2384	34.3938	38.0271	38.0198	40.2306	37.0521	37.6181	39.1362	31.6279	30.3339	30.2311	33.2348	33.8864	32.1963	34.2309	34.7353	32.2472	43.2285	45.5954	46.9331	43.3245	44.0131	46.8749	40.3443	47.6712	41.9054	38.859	36.484	34.6746	36.7518	36.8473	36.3805	36.6908	32.9824	33.0975	40.6379	39.8687	37.1696
ENSMUSG00000001768	Rin2	5.33406	5.24946	5.87993	10.7363	11.2447	10.4555	11.2083	12.3339	12.1243	7.63444	7.04369	6.95871	10.9473	10.2937	11.0261	11.7813	13.182	11.8603	7.66181	8.48606	8.43492	10.3868	11.8131	10.9938	9.52415	10.5488	9.85808	21.1013	18.8274	23.3048	15.0242	13.5098	14.3614	8.92271	10.3556	9.74301	23.2496	20.2602	16.9887	23.651	24.7337	20.3886	19.3685	16.8995	19.2755	9.25883	8.80915	7.6348
ENSMUSG00000001773	Folh1	0.055769	0.00985936	0.00914659	0.0280075	0.0614808	0.0768822	0.193334	0.348557	0.290279	0.0706367	0.104957	0.0875635	0.0804772	0.105977	0.0817002	0.265114	0.284226	0.252375	0.0481832	0.0384141	0.0714997	0.0487229	0.0664833	0.0203308	0.0894689	0.0386058	0.122062	0	0.0880911	0	0	0.0575722	0.043046	0.0113066	0.0223083	0.0393075	0.0102961	0	0	0.0107625	0	0	0	0	0	0.0295671	0.0091191	0.0184081
ENSMUSG00000001774	Chordc1	82.0724	87.0934	89.7205	85.9577	91.572	84.9208	78.9128	88.8742	107.416	76.654	75.0884	73.2012	79.6084	79.8199	77.9512	78.7671	77.4953	78.9268	67.2556	68.7781	62.7563	72.1749	74.4996	66.5826	71.8202	74.3107	65.5803	108.674	115.89	121.789	117.359	125.472	134.117	111.829	130.874	127.342	79.2573	78.4919	68.0876	75.3927	77.0942	74.9213	77.2484	71.5193	77.0029	81.7193	83.835	72.4193
ENSMUSG00000001783	Rtcb	176.73	174.252	179.961	190.255	197.772	188.647	207.657	198.942	189.616	199.598	189.368	200.811	209.018	210.209	213.979	209.781	198.707	211.906	176.973	165.213	168.912	183.916	176.383	171.812	180.611	186.026	167.074	196.624	226.145	207.757	229.427	212.618	220.614	208.369	211.118	204.896	193.624	200.007	192.673	202.817	191.183	202.524	197.256	188.274	195.605	178.802	173.101	167.362
ENSMUSG00000001785	Pwp1	67.3811	69.4833	66.4071	61.5543	65.8616	63.0651	73.2056	70.9847	73.898	59.8564	56.9833	62.8891	64.9363	63.1095	68.1298	68.4111	67.8039	62.5844	51.5156	50.0496	48.9445	54.2812	53.3729	52.8623	56.3987	57.2756	52.6498	89.5002	95.7003	93.7778	87.5499	91.0356	95.0968	86.7479	87.3847	82.9315	66.0253	69.0694	61.7731	70.6976	66.6441	68.6005	70.6614	62.2575	69.0247	58.4393	58.9636	54.9283
ENSMUSG00000001786	Fbxo7	13.6937	13.4554	12.7157	12.4919	12.9108	13.208	17.112	15.7667	15.0635	16.6186	16.6984	18.9072	19.147	17.7674	18.9607	20.6514	18.87	17.9334	17.9385	18.6452	18.2022	19.6058	18.9785	19.3455	20.8107	23.2374	22.3291	12.5569	14.699	12.4051	9.03679	9.31366	8.44971	10.3188	10.0024	9.82347	15.2609	15.3179	12.8118	16.8597	12.7943	12.8547	15.1652	12.7739	14.4578	19.2463	18.3959	17.0554
ENSMUSG00000001794	Capns1	171.701	180.039	166.238	182.322	164.945	196.878	192.815	177.57	146.227	166.854	161.691	170.708	156.329	154.547	150.886	139.785	132.55	136.621	173.867	165.223	191.986	157.177	165.474	157.536	140.908	164.363	162.267	225.016	237.2	198.369	166.3	184.831	190.265	213.433	206.274	193.042	201.342	212.846	192.48	197.507	180.48	185.535	206.442	197.615	188.609	146.666	147.702	148.494
ENSMUSG00000001802	Lrp3	42.2421	38.1433	40.0952	43.6326	42.2793	47.7816	51.4586	44.6323	32.7579	36.6803	35.2367	46.2996	35.0185	35.209	36.0518	29.3026	30.2388	31.177	31.4279	30.7712	30.3044	28.3057	25.311	27.2689	26.1948	23.3748	24.4929	52.7092	48.7829	44.1638	51.1128	41.3259	43.0618	45.0379	39.9479	39.8213	53.0524	57.0973	48.7364	43.2139	40.3603	40.7422	42.6191	43.5485	40.6204	27.4451	29.115	29.1835
ENSMUSG00000001804	Dsg4	0	0	0	0.02074	0	0	0	0	0.0153431	0.00731666	0.00809614	0.00811314	0	0.0080401	0.0239643	0.0586821	0.0160855	0.0248072	0	0.00718881	0.0133011	0.0145255	0.0213451	0.0152082	0.03877	0.0508657	0.0250589	0	0	0	0	0	0	0	0	0	0	0	0	0	0	0	0	0	0	0	0.0197763	0.0129181
ENSMUSG00000001815	Evx2	0	0	0	0	0	0	0	0	0	0	0	0	0	0	0	0	0	0	0	0	0	0	0	0	0	0	0	0	0	0.00653526	0	0	0	0	0	0	0	0.0199513	0	0	0	0	0.0115547	0.00647222	0	0	0	0
ENSMUSG00000001819	Hoxd13	0	0.0307323	0	0.00988716	0	0	0	0	0.0329534	0	0	0	0	0	0	0	0	0	0.0102876	0	0	0	0	0	0	0	0	0.0567125	0.0342937	0	0	0.0396689	0	0.0118762	0.0349593	0	0.0211387	0	0.0306818	0.0110998	0	0.0110043	0.0625845	0.0217109	0	0	0.0188914	0
ENSMUSG00000001823	Hoxd12	0	0.0200436	0	0	0	0	0	0	0	0	0	0	0	0	0	0	0	0	0	0	0	0	0	0	0	0	0	0	0	0	0	0	0	0	0	0	0	0	0.0100055	0	0.0101938	0.0107657	0	0	0	0	0	0
ENSMUSG00000001827	Folr1	0.90449	0.473772	0.62622	0.472812	0.306758	0.264555	0.248949	0.123825	0.189035	0.111138	0.0408842	0.487808	0.193491	0.335642	0.0991155	0.147837	0.0794055	0.13877	0.028448	0.11404	0.223627	0.0963189	0.0843459	0.0604644	0.030557	0.115825	0.0790553	0	0	0.11462	0	0	0	0	0.0345126	0	0.0622557	0	0	0	0	0	0.0298397	0.0373153	0.0874008	0.50628	0.193844	0.826739
ENSMUSG00000001829	Clpb	32.8732	38.392	35.5645	34.0311	29.9572	33.0554	47.4339	37.701	31.3045	27.1747	26.8593	26.5094	30.8265	29.5275	27.9995	29.6877	26.3189	28.9493	22.7119	22.5701	24.7009	26.3557	24.8326	26.0726	24.6029	26.9633	27.4472	31.544	35.0603	35.493	28.5108	31.8268	30.616	36.1632	32.1146	29.3158	26.6855	29.2424	24.9922	33.5087	30.8793	30.2626	31.2811	28.2012	27.3672	33.3614	32.5432	25.3049
ENSMUSG00000001833	2019-09-07	122.93	135.653	136.322	142.305	152.144	143.354	127.651	145.373	174.567	159.173	148.765	151.148	149.811	147.93	148.396	141.951	140.168	144.631	162.054	146.226	147.964	154.356	148.227	149.513	147.582	150.905	144.544	207.88	213.651	237.254	NA	215.983	248.441	200.588	224.268	228.65	223.299	205.324	193.007	215.88	189.563	198.916	226.081	198.535	215.561	138.614	137.911	120.677
ENSMUSG00000001844	Zdhhc4	36.7704	38.376	33.9404	36.1787	32.3547	36.1457	36.448	35.0374	31.3765	34.4883	32.5609	35.5382	35.2371	36.8083	35.1407	32.7783	34.5467	34.012	35.4749	34.9315	38.8546	31.4947	35.2151	36.6713	32.7572	31.0565	37.405	38.3942	33.2443	32.7559	32.9824	37.2026	34.0159	38.5872	34.4166	31.6889	38.2173	44.5038	38.5237	44.9551	38.6501	38.4394	38.3363	40.2579	38.4953	34.4309	34.7106	35.2368
ENSMUSG00000001847	Rac1	280.393	293.864	289.548	276.473	277.534	290.225	277.43	286.969	295.127	288.239	280.219	278.261	297.257	288.989	295.503	275.02	270.885	276.587	293.085	299.567	294.614	293.236	293.506	296.126	279.328	313.515	303.034	389.818	383.569	401.368	336.267	370.717	405.875	355.02	360.643	353.627	348.104	343.456	330.976	315.909	331.164	321.81	326.135	304.284	318.563	264.089	264.748	257.582
ENSMUSG00000001855	Nup214	29.9228	34.767	29.3221	32.9026	32.1014	32.4955	34.0779	32.6506	27.7245	31.6555	35.4098	35.5137	30.4557	33.0951	30.3712	32.6726	33.8251	31.986	25.8769	29.329	32.7289	25.2251	26.6558	28.2963	25.7201	26.145	30.1659	30.7866	44.7942	26.1721	39.8662	31.6528	27.915	28.3778	28.4418	28.6117	28.0351	28.1332	26.1718	30.1892	31.4809	30.3344	30.5979	24.0812	30.062	27.9562	27.426	30.3784
ENSMUSG00000001864	Aif1l	71.7909	68.0798	73.4203	80.1269	76.9658	79.4482	81.8108	79.1717	74.512	64.6676	61.2641	67.3925	58.2201	62.7888	64.4721	57.9196	62.2969	58.884	43.2274	47.4116	40.2245	38.268	35.547	41.0472	33.9312	33.5729	35.9486	82.0021	84.0279	82.0167	102.163	89.1423	90.1254	108.946	105.318	106.63	74.9838	80.4528	72.4434	86.8985	80.0925	88.0186	88.2112	78.3885	97.2715	48.9105	48.5959	50.4305
ENSMUSG00000001865	Cpa3	0	0	0	0	0.0565792	0.017668	0	0.0189211	0	0.0933776	0.0206892	0.0202322	0.0660307	0.0204174	0.121656	0	0	0.0423736	0.123429	0.228984	0.278715	0.321416	0.243573	0.242564	0.0378706	0.442076	0.203382	0.0407669	0.341886	0	0.0266929	0	0	0	0.0832633	0.0362442	0.780257	0.652042	0.574049	1.35169	0.745397	0.750885	0.823663	0.760542	0.449042	0.109042	0.0168138	0.0507845
ENSMUSG00000001870	Ltbp1	20.0927	21.3211	18.4306	23.433	26.1816	21.8183	19.8863	17.866	15.8928	9.44128	10.6411	10.4164	13.9861	14.5654	15.1471	15.6109	17.223	16.1017	5.70285	8.2433	9.13866	7.8205	9.60352	10.4653	12.8449	11.5526	15.2906	9.84522	8.3862	10.2363	4.78143	4.18036	5.29638	7.65534	8.4562	7.17952	20.7788	19.8354	16.6318	22.506	24.8599	21.0105	32.4387	24.4524	24.062	22.7761	24.2699	23.0289
ENSMUSG00000001891	Ugp2	46.5379	48.6348	49.1088	52.4379	50.7611	48.0338	48.1903	49.1154	53.7173	62.5296	60.187	57.8719	61.4108	60.739	62.3807	64.8274	63.3842	67.3023	63.356	64.1941	61.6375	65.0328	64.844	68.1048	67.2232	71.4177	69.7414	47.4011	63.0217	51.0056	47.5244	52.9635	61.4681	52.5705	59.9717	58.6584	58.6979	57.2659	52.0483	65.2116	60.2431	62.2411	66.1243	65.6578	61.0925	73.039	73.1507	67.1894
ENSMUSG00000001901	Kcnh6	0.568655	0.520897	0.416093	0.0604121	0.0862051	0.088657	0.106537	0.114989	0.0793623	0.124156	0.0753918	0.216837	0.193575	0.0499127	0.0826507	0.112297	0.166432	0.119778	0.156374	0.163599	0.111231	0.261746	0.248901	0.227346	0.184466	0.214886	0.129603	0.0245721	0	0.0669344	0	0.00866387	0.00803887	0	0	0	0	0.0191181	0	0.0183837	0.0182016	0.015896	0.0225924	0.0156728	0.00738827	1.09184	0.899896	0.90027
ENSMUSG00000001909	Trmt1	62.6184	56.2685	57.3907	55.1299	56.9377	59.9789	63.4533	53.8568	52.0884	52.4947	49.836	57.069	62.5845	60.03	59.1471	62.0566	68.8277	67.7779	57.9379	66.5606	61.6835	57.3414	59.3813	65.1071	64.6022	55.0401	64.4978	59.2838	51.5909	57.3403	69.8062	52.7295	57.9112	57.2874	53.6312	56.277	59.429	67.6396	52.4278	64.915	59.2313	56.5157	60.3302	56.0425	62.1988	56.8496	57.769	62.3804
ENSMUSG00000001910	Nacc1	145.168	143.513	143.554	116.718	112.363	123.951	137.171	124.718	99.7746	99.58	92.4406	99.6508	103.096	102.602	99.859	101.668	97.9871	91.0325	101.961	97.0908	96.5745	103.241	101.59	95.5247	95.6732	98.7082	97.2477	114.678	86.1683	109.442	126.247	120.527	114.565	123.51	110.646	109.295	81.2856	85.2348	80.1639	89.5078	90.0136	89.4014	87.6889	87.2447	89.2139	128.545	125.53	128.23
ENSMUSG00000001911	Nfix	0.123113	0.0695389	0.0833538	0.0247711	0.142418	0.0212137	0.0121716	0.0196354	0.0182087	0.265184	0.311794	0.130018	0.621863	0.543062	0.333008	0.498434	0.529556	0.817949	1.6098	2.76473	2.13931	2.32211	2.45805	2.3838	3.3428	4.83119	4.5834	0.112132	0.176591	0.0868338	0.173592	0.160912	0.691736	0.205644	0.213711	0.305355	8.29651	6.2842	4.62989	14.1081	12.6281	10.0922	19.108	12.8683	12.1067	2.16705	1.95133	1.56054
ENSMUSG00000001918	Slc1a5	44.3373	44.017	43.0334	41.3573	39.781	41.1411	46.2392	36.9209	35.0294	24.0162	24.0094	28.7919	29.1746	29.4222	31.3441	29.9281	30.5886	29.0964	33.076	32.8603	34.5819	30.4039	32.6234	33.9686	42.907	35.9871	41.3371	42.4027	47.2735	39.2796	31.032	36.641	33.3481	44.377	36.2189	38.2985	25.8406	28.9654	21.4333	21.8862	19.319	18.57	29.3625	29.1387	28.0259	30.4887	29.5554	30.6643
ENSMUSG00000001924	Uba1	255.645	277.352	236.743	223.929	236.707	227.47	268.915	237.559	215.266	217.117	207.569	222.365	211.92	216.994	205.663	208.471	203.911	195.036	195.729	217.169	237.053	199.517	219.414	231.162	185.311	215.674	241.075	267.37	345.573	251.505	253.662	268.595	244.369	266.022	260.419	249.671	231.518	233.865	207.481	252.673	229.174	239.913	240.479	192.264	228.57	237.42	232.729	222.313
ENSMUSG00000001930	Vwf	0.447282	0.00981642	0.135055	0.0767175	0.104946	0.0278121	0.115841	0.113041	0.137721	0.104142	0.138041	0.0546629	0.0790554	0.0214132	0.267938	0.180259	0.148146	0.500565	0.0839575	0.128692	0.103293	0.0918867	0.0990167	0.105728	0.0606553	0.0482197	0.021962	2.43214	2.90895	2.44953	1.88801	1.33735	1.68625	1.10409	0.741042	1.09564	3.62083	2.53475	2.20056	2.58352	2.76202	1.86679	2.36036	1.87652	1.71941	0.426557	0.444278	0.352278
ENSMUSG00000001942	Siae	4.64622	5.58192	4.47963	5.5719	5.31466	5.03221	5.70053	5.79223	6.00435	5.10377	5.34372	5.26451	4.9939	4.94815	4.81897	6.23219	5.79786	5.58368	3.80244	4.19058	4.20718	3.77712	4.37111	4.27082	4.55138	5.57657	5.24176	4.54316	2.75935	2.75233	3.1958	2.55628	2.76496	3.07371	2.61105	2.47096	5.55142	4.68376	4.13309	4.93695	4.14367	3.73877	4.28783	3.40971	3.51908	6.09264	5.94155	5.10765
ENSMUSG00000001943	Vsig2	0.0285682	0.0477561	0.0440906	0	0.0252388	0.0237423	0.103255	0	0.0510739	0.0245973	0	0.0272633	0.0220992	0.0270592	0.0538132	0	0.0541712	0.0834117	0.14225	0.142739	0.110067	0.0718761	0.0234874	0.0755958	0.0255503	0.0239962	0	0.237911	0.761434	0.403653	0	0.530018	0.52411	0.472169	0.33249	0.26432	0.321798	0.486352	0.238237	0.311538	0.291566	0.153726	0.218986	0.278724	0.379163	0.120014	0.13218	0.128709
ENSMUSG00000001946	Esam	0.117677	0.190274	0.0779007	0.175396	0.0889663	0.140359	0.242195	0.150211	0.0773607	0.142656	0.143026	0.223107	0.131495	0.234845	0.278462	0.143917	0.126497	0.143824	0.829671	0.701605	0.54527	0.382265	0.374595	0.157851	0.226633	0.127543	0.0814795	18.4812	19.0986	16.5169	13.3144	15.0525	16.2921	14.443	12.2156	12.9544	23.4881	24.7623	17.9018	23.5971	22.871	19.5065	23.1239	20.6023	18.49	1.51989	1.74646	0.580807
ENSMUSG00000001948	Spa17	9.92366	11.141	10.6881	12.8183	13.6749	10.9654	11.5384	11.6184	12.7638	7.91409	6.79309	7.66969	8.10085	7.87341	9.35972	6.96823	6.20035	10.9971	7.37166	6.98523	7.43591	8.48663	6.57449	8.93823	7.82764	8.50903	6.94963	10.7101	21.9969	13.4844	13.3074	9.35135	9.39292	9.31693	9.83398	9.13399	8.31491	8.50718	7.89445	7.81246	6.53073	8.13579	5.41242	5.4896	6.00222	10.6604	10.5302	10.6027
ENSMUSG00000001962	Fam50a	43.394	41.3063	38.9131	40.589	41.3986	38.5196	37.9667	37.8481	39.7234	37.6447	39.0969	37.9434	38.8323	40.4013	41.7151	37.3989	40.6872	40.2861	34.4696	42.6985	37.6862	35.9219	36.871	41.4994	38.1788	38.1159	41.9652	38.8112	60.6882	42.9244	43.3936	45.7844	46.0349	45.6503	48.0637	43.6399	48.9439	45.2838	43.6343	48.9301	44.5895	45.1736	45.8484	39.7732	45.6504	46.9904	47.0389	41.892
ENSMUSG00000001964	Emd	200.297	205.952	190.864	204.976	197.474	218.876	222.043	214.56	216.283	163.789	151.866	163.697	172.853	163.595	175.348	165.246	177.7	153.211	179.087	189.812	190.342	188.922	202.535	201.494	170.246	197.333	195.205	211.597	178.51	209.394	178.771	206.615	222.116	204.611	213.989	197.939	148.049	169.132	138.405	164.834	151.505	160.985	163.898	143.876	163.768	154.3	148.935	143.89
ENSMUSG00000001983	Taco1	24.6314	26.4132	26.9504	23.2074	25.5049	24.2601	27.3102	26.3961	24.2355	23.4873	22.1998	22.6106	25.9848	25.4976	24.8847	25.7107	27.2521	25.3153	21.7392	24.0817	20.1955	22.9871	22.4536	23.7755	23.4459	24.6202	23.1058	30.6339	23.8401	29.2559	29.3937	32.7434	30.4407	29.0944	33.222	30.3484	26.4062	28.6663	24.7121	26.1491	24.9156	26.1378	25.2282	21.6009	25.1829	25.7346	23.7486	22.1367
ENSMUSG00000001985	Grik3	0.0903632	0.0643221	0.094806	0.0181857	0.0170472	0.00804064	0.0347313	0.0171718	0.0345356	0.00821281	0.0121239	0	0	0.00300741	0.00896189	0.00549394	0.00601576	0.0123753	0.0216691	0.0351147	0.0324836	0.0955942	0.125735	0.122813	0.0437534	0.027319	0.0753514	0.406573	0.274405	0.504202	0.0394755	0.187133	0.142318	0.220198	0.289516	0.250556	0.416446	0.340244	0.24625	0.278252	0.190786	0.1498	0.171849	0.085135	0.163587	0.0807099	0.0518785	0.0654638
ENSMUSG00000001986	Gria3	6.04785	6.98736	6.2964	6.30949	6.81027	6.89244	2.64551	2.72378	2.93262	7.08242	7.26521	6.77603	6.94225	7.36363	6.98338	5.01106	4.5858	4.27958	5.76883	5.95408	5.81335	5.1804	4.40946	4.29212	4.51891	4.1693	4.95232	4.69705	4.22679	4.79035	1.90951	2.75738	3.14333	3.5573	3.83944	3.80024	5.00531	4.25578	3.58645	5.10147	4.73023	4.22768	4.49825	3.6254	3.75638	4.37888	4.27163	4.00875
ENSMUSG00000001988	Npas1	0.581263	0.590806	0.648198	0	0	0	0.0337741	0.0125268	0.050444	0.0617641	0	0.026789	0	0.0135056	0.0133358	0	0.0132517	0	0	0	0	0	0.011595	0	0.0126286	0	0	0.0135248	0	0	0.0177661	0.0469096	0.0131776	0.0138352	0.0136847	0	0.100807	0.0654597	0.118141	0.158028	0.0247265	0.0655953	0.0121405	0.0272352	0.0119462	1.18124	1.13762	1.15864
ENSMUSG00000001995	Sipa1l2	10.374	10.0732	10.2543	9.37424	8.39938	9.22122	17.7106	16.0507	14.06	19.4335	18.335	18.1387	19.9314	18.8906	16.6122	15.5895	15.8436	14.5737	27.4653	24.5153	24.8112	25.1951	24.3275	22.4151	17.4318	19.418	18.6179	17.0892	9.51745	17.3702	12.7586	12.0712	11.5824	13.7149	13.511	12.6995	37.7917	36.5422	34.2691	26.1483	29.7506	26.9643	22.5948	21.5069	21.2112	15.582	15.4361	13.46
ENSMUSG00000001998	Ap4e1	8.81429	8.95362	8.41639	8.6362	10.152	9.56359	9.1465	9.94818	10.9714	10.0132	9.23448	9.39158	9.84758	9.88726	9.10184	11.0849	9.81883	10.2283	9.51334	9.0541	8.78371	9.6793	8.65642	9.14696	10.0246	10.4758	9.12674	7.94075	5.047	7.76225	7.57869	7.66512	9.15951	7.08338	8.12173	7.76645	7.89681	6.80508	5.5375	7.16934	8.09893	5.97615	6.35933	5.83096	6.20774	9.33937	8.93651	6.83788
ENSMUSG00000001999	Blvra	6.32705	5.27476	6.21406	12.4557	12.5338	12.1765	18.1127	18.9491	21.6248	29.9926	27.4863	26.0057	31.4604	30.8716	30.9243	32.4818	29.5845	27.2912	36.5102	34.5405	34.7224	37.0698	36.8795	36.309	39.9724	40.3341	36.0732	17.2221	22.4862	17.8946	14.1469	15.5883	17.7334	16.0665	14.8574	15.83	19.6983	22.4504	18.2024	21.7282	17.456	20.0408	23.4453	20.9174	21.5961	11.6676	10.6117	9.67023
ENSMUSG00000002006	Pdzd4	14.7559	13.0867	13.8937	18.5455	17.4747	17.2675	18.8891	17.3414	15.7793	18.679	18.4388	18.6475	22.6456	22.7577	22.3156	20.8205	20.7504	20.9377	18.8973	18.6657	17.5265	22.0694	21.4417	20.5083	20.5001	19.4537	19.2601	14.0354	15.8545	14.3073	14.92	11.7675	12.0374	13.9255	13.3055	13.3087	29.253	30.9301	28.7319	28.403	26.0078	27.2434	26.8874	24.9159	24.12	18.2843	18.2113	17.1469
ENSMUSG00000002007	Srpk3	0.0314606	0	0	0	0	0.0261367	0	0	0	0	0	0	0.0121004	0	0	0.0134599	0	0.015192	0.0707007	0	0.125707	0	0	0	0	0	0	0	0	0	0.100425	0.0380356	0.111541	0	0	0.149679	0.0270688	0	0.0130814	0.0568391	0.0723749	0.0140741	0.377156	0.256855	0.111224	0	0	0.0118147
ENSMUSG00000002010	Idh3g	112.815	124.166	123.915	107.767	109.373	126.601	124.475	112.546	101.066	91.1792	81.6253	97.2462	98.131	93.5156	94.6377	92.8869	94.4761	98.0281	87.4044	89.013	89.6572	90.2305	90.4597	94.3083	90.0686	103.074	96.8627	146.001	129.359	133.204	134.66	121.63	140.243	133.846	134.655	122.135	102.386	108.724	107.015	115.302	96.7348	106.736	107.408	102.891	111.179	113.215	106.324	114.08
ENSMUSG00000002012	Pnck	11.0532	10.3758	10.0485	8.93359	9.66347	9.45432	10.9094	8.73521	7.65136	11.2048	9.28447	11.112	8.85881	10.5519	9.47017	9.19005	8.35282	9.13832	8.80361	8.65943	9.5596	9.24723	8.60343	8.11315	10.279	9.02245	8.84063	2.11927	2.53082	2.45435	2.11787	1.69027	1.52276	2.96673	2.31195	3.16063	7.45159	6.55432	5.73654	2.36492	2.57633	2.50365	5.61075	5.6192	5.66168	18.5772	17.296	16.7862
ENSMUSG00000002014	Ssr4	103.126	90.1646	93.4014	95.2333	83.7193	82.5196	93.4251	84.6407	78.8986	107.014	90.6186	107.331	111.304	101.206	105.783	107.363	100.684	99.7624	130.707	131.509	124.96	117.849	118.016	115.141	127.399	120.693	119.441	77.0502	101.561	73.8716	71.4571	75.4505	75.5653	79.2862	62.7659	73.3389	82.8562	100.168	90.9803	96.3897	76.2731	105.01	83.3537	78.8142	96.7558	110.003	111.754	103.627
ENSMUSG00000002015	Bcap31	73.4713	87.563	84.7868	88.6913	94.6644	88.7422	82.0097	88.8478	95.1241	94.7693	92.5102	95.4763	87.2604	94.3295	91.0692	88.0227	86.2997	89.2194	88.0612	90.083	96.1939	81.9404	86.3226	90.4575	80.4374	86.3642	85.5447	74.4277	87.7477	76.1365	58.6276	67.4329	69.6916	67.4251	68.6171	67.9645	77.199	75.8875	65.3354	70.6614	65.3835	67.2711	70.8086	66.6831	63.0676	85.9041	85.1813	85.6814
ENSMUSG00000002017	Fam98a	35.0085	39.3803	38.1364	32.9565	32.524	33.2661	31.1796	35.6074	39.0632	34.9379	34.8677	36.424	38.6901	36.2305	35.3319	38.9131	36.1423	38.5107	34.0667	34.6222	36.7306	35.6439	35.9754	34.4218	34.9499	36.1436	33.5273	42.2458	40.5155	41.6906	38.2487	41.8045	43.5727	39.6787	44.4853	42.3305	34.1676	30.6155	30.5569	37.467	32.8614	33.8859	37.2241	35.2795	36.5009	39.0051	37.2428	36.2497
ENSMUSG00000002020	Ltbp2	0.0740655	0.156796	0.162019	0.068254	0.0945988	0.0350202	0.211821	0.284143	0.120278	0.355141	0.297745	0.219316	0.154424	0.625435	0.309824	0.253864	0.264985	0.251528	0.550203	1.14837	1.0436	0.648905	0.463432	0.713185	0.598973	0.613808	1.09651	0.0576646	0.0246814	0.182328	0	0.0213917	0.180384	0.108195	0.0356764	0.0109328	0.146201	0.0479077	0.0676415	0.0842296	0.0770339	0.120793	0.170047	0.0378544	0.0366213	0.333507	0.159524	0.163684
ENSMUSG00000002028	Kmt2a	16.8387	19.1429	15.9029	17.1802	17.2971	19.54	15.3958	18.5845	15.1555	12.0382	13.7808	12.0887	13.0269	12.2199	11.114	10.8304	12.3721	9.7793	11.7447	11.624	10.6342	11.7966	11.3403	11.3716	10.0328	8.90339	10.4726	22.4399	5.53721	17.9281	14.7717	18.8699	18.5113	19.2511	18.4695	14.8695	17.4638	13.2989	14.5507	11.5807	19.6755	12.8831	14.1583	13.7548	12.9699	11.8439	13.017	12.3043
ENSMUSG00000002031	Ift46	90.0869	85.5435	84.7812	91.5314	98.4408	91.9181	87.6393	83.4454	96.2092	87.3994	83.8686	87.0572	88.1737	80.5872	95.5141	87.314	77.0407	90.8579	80.9496	79.4524	86.5276	78.8697	81.3086	81.6706	83.6229	86.2298	85.8151	84.7854	90.2651	93.2821	70.8453	98.5235	90.2543	86.3441	92.498	95.6486	97.0904	95.3696	88.6337	101.248	93.5853	95.7451	95.7415	74.7929	90.5441	83.9473	79.701	83.0596
ENSMUSG00000002032	Tmem25	1.26795	1.27172	1.32846	1.67855	0.918497	1.1556	1.28036	0.833085	0.809673	1.31004	1.0102	1.283	1.05361	1.03169	0.954175	1.01063	1.11584	1.27885	0.721619	0.959695	1.05461	0.746303	0.694889	0.858731	0.639756	0.773362	0.937526	0.592436	0.385823	0.913802	0.374289	0.691649	0.49864	0.547487	0.402434	0.603064	0.873292	1.27224	0.920748	1.05412	0.870928	0.804517	1.09854	1.28491	1.05378	1.55513	1.72046	1.41713
ENSMUSG00000002033	Cd3g	0	0.0547794	0	0	0	0	0	0	0	0.0282806	0	0.030596	0	0	0	0	0	0.121113	0.0909987	0	0.0491698	0.175647	0.0260487	0	0	0.0264801	0.0304698	0	0	0	0	0	0	0	0	0	0.410122	0.229561	0.0298588	0.10787	0.0280904	0	0.233905	0.0621051	0.0809162	0	0.0887467	0
ENSMUSG00000002043	Trappc6a	46.8046	33.7488	34.6164	48.8474	59.0024	57.1758	69.5366	47.9199	41.5388	55.4742	52.6222	67.6342	67.0349	68.0127	77.6455	68.5893	72.6765	77.7774	46.2975	46.3143	46.462	45.9779	46.794	49.0048	46.3872	49.1358	51.745	24.7966	32.2168	24.6823	29.2391	23.6317	21.389	34.298	32.2364	26.4133	30.4381	40.1733	34.6019	32.5007	30.9904	39.5181	40.2189	38.8376	45.3627	51.7568	58.1055	57.3603
ENSMUSG00000002052	Supt6	44.0405	46.1878	39.5941	42.387	46.1438	43.5523	47.4423	46.8102	41.7535	41.4636	42.7052	43.1194	40.958	42.178	40.2789	44.3855	44.8102	41.3878	33.7707	38.0084	45.788	35.0917	39.9868	40.3159	35.0543	36.3686	43.5867	42.754	32.3138	37.6685	41.9711	44.3981	39.6734	43.8704	48.4767	39.417	41.4838	40.5168	40.3536	39.9644	44.3732	41.7734	43.344	37.8558	41.3779	42.4348	42.8872	41.6098
ENSMUSG00000002055	Spag5	64.4846	69.6959	66.1762	61.8694	65.5579	64.4364	66.6306	67.296	64.8478	49.7632	52.071	51.444	48.4023	50.8412	51.3841	52.1189	47.7376	49.7694	45.6723	45.3254	48.4927	46.3886	49.5529	50.3661	54.3834	49.0613	51.3039	78.3234	80.0954	79.7199	78.8451	76.4989	79.6463	82.4821	81.3849	85.4048	74.6021	71.7724	68.4664	74.2262	83.0227	75.7995	66.2604	61.1708	72.0362	57.1057	57.8666	51.0512
ENSMUSG00000002057	Foxn1	0.265651	0.242873	0.366479	0.654821	0.915239	0.843842	2.42335	1.81076	1.63664	1.24908	1.53261	1.27954	0.770504	0.695571	0.787342	1.74346	1.69793	1.82344	0.646603	0.740196	0.619925	1.06695	1.31075	1.12805	2.2343	2.49273	2.10425	0	0	0	0	0	0	0.00869885	0	0	0	0	0	0.00828045	0	0	0	0	0	0.455113	0.379048	0.467867
ENSMUSG00000002058	Unc119	132.042	120.662	120.214	152.144	147.171	150.771	172.807	143.221	130.511	119.943	114.993	134.184	142.277	137.958	148.828	136.632	129.965	136.702	125.673	123.071	133.095	132.417	125.807	128.659	130.902	129.298	123.795	135.714	140.707	128.794	149.792	121.105	133.215	133.384	130.409	119.978	130.633	152.006	121.193	150.916	146.631	163.292	123.686	114.641	129.9	118	118.16	113.41
ENSMUSG00000002059	Rab34	47.756	48.625	46.5128	63.4761	68.3763	63.0531	82.0062	78.1909	69.5833	59.1179	62.5034	66.9873	75.1608	75.4465	81.2328	73.0472	77.1923	73.2127	69.2955	77.6757	67.4109	84.4492	77.9458	89.4455	81.5564	78.122	87.7274	74.9843	93.5313	71.5385	89.2277	75.2186	79.9671	98.7593	88.3789	88.0807	94.7477	102.984	84.7031	107.731	102.505	104.142	116.63	103.538	119.357	51.154	49.1755	50.5422
ENSMUSG00000002064	Sdf2	56.981	54.7952	59.5708	60.6277	57.4353	63.6617	63.4908	57.5356	58.4636	67.4956	63.935	72.7747	71.1964	65.3209	67.3097	75.6599	68.3401	63.4133	70.6851	70.3576	66.67	72.7137	66.0999	70.7149	74.3663	74.9054	69.7241	34.7631	48.7296	39.1045	42.8694	36.7898	39.4942	46.0863	39.7357	40.1503	48.9929	53.7635	44.7541	56.7918	54.165	50.5901	52.7005	50.4215	47.6592	72.9093	66.2569	67.1129
ENSMUSG00000002068	Ccne1	64.8081	85.7082	75.1961	60.3	70.6288	61.0776	67.5833	73.5454	76.6057	39.069	40.8056	42.8846	39.9986	43.6578	43.0216	41.3975	33.7656	39.7357	38.4161	33.6929	34.7661	38.0391	38.3265	32.9371	38.932	38.06	33.5346	163.018	137.477	165.444	178.939	163.021	191.706	151.655	154.487	143.634	60.0535	63.8625	59.1344	74.0362	70.2368	73.3883	88.0128	83.7093	85.0458	46.0031	43.475	44.3442
ENSMUSG00000002076	Hsf2bp	0.415425	0.33725	0.519818	0.437397	0.260481	0.378367	0.43703	0.35302	0.351351	0.663228	0.423508	0.217174	0.204501	0.840774	0.263442	0.515846	0.244686	0.795121	0.559021	0.345386	0.223356	0.295787	0.576961	0.263789	0.293574	0.253662	0.461307	0.737563	0.199535	0.48456	0.0379556	0.311938	0.121895	0.522756	0.366274	0.435038	0.75617	0.32771	0.431053	0.646114	0.294935	0.714849	0.38582	0.325095	0.306796	0.32444	0.166135	0.65215
ENSMUSG00000002083	Bbc3	16.3712	10.7431	11.2022	11.167	11.3334	10.4342	6.68763	6.02327	5.02034	10.117	10.5683	13.2633	8.96542	10.1672	8.88739	5.79575	6.83281	6.24141	13.9592	11.434	13.0497	9.91757	7.70962	9.07633	7.41577	6.37972	7.84075	9.3512	10.5937	8.79922	11.0819	7.49573	8.28302	7.38409	9.07115	7.31514	6.47343	7.26568	6.22368	4.37738	4.2965	5.39496	4.86354	5.61986	6.75877	13.4123	13.9393	12.6952
ENSMUSG00000002100	Mybpc3	0	0	0	0	0	0	0	0	0	0	0	0	0	0.00667392	0	0	0	0	0	0	0	0	0	0	0	0	0.00694275	0.0131916	0	0.0268583	0	0	0	0	0.01347	0.0119778	0.0122739	0.0127191	0	0.012895	0.00605304	0.00638153	0.00604532	0.00629022	0	0	0	0.0107661
ENSMUSG00000002102	Psmc3	332.01	406.368	430.624	377.26	372.575	411.297	359.236	416.684	444.141	272.103	245.159	273.646	276.911	264.82	277.882	273.04	267.329	244.049	240.099	232.501	233.766	256.793	262.179	258.23	267.6	288.728	247.805	486.831	500.835	504.692	430.746	463.382	508.092	499.951	445.864	469.75	301.713	325.406	289.608	333.491	310.978	331.243	324.833	291.76	317.243	308.649	284.7	265.244
ENSMUSG00000002103	Acp2	29.598	27.9572	26.6831	21.8003	25.9557	22.5012	24.2273	22.0214	20.5354	16.9559	16.3043	18.1687	18.1098	18.058	18.9905	17.5743	18.4265	16.3163	14.8558	14.9494	14.9768	13.4744	13.7185	12.9035	15.1615	15.3794	13.7629	28.7114	21.3401	25.1318	28.3058	26.0525	26.1795	24.6329	27.6352	26.1163	31.475	30.1836	25.1364	27.0483	26.8468	25.4087	27.3221	22.7607	23.8211	27.0589	27.3944	24.6793
ENSMUSG00000002104	Rapsn	0.0891159	0	0.086006	0.283888	0.370939	0.461113	0.643254	0.321031	0.23936	0.280793	0.105624	0.169702	0.154167	0.168691	0.0627022	0.0570122	0.251998	0.413145	0.185481	0.115959	0.155113	0.217164	0.11726	0.097764	0.0599246	0.0836165	0.150079	0.041144	0	0.052851	0.217349	0.482044	0.361581	0.538387	0.573669	0.520655	0.0979755	0.152272	0.0476218	0.341462	0.0752148	0.234546	4.08189	3.38755	2.37393	0.0471183	0.0947273	0.0835777
ENSMUSG00000002105	Slc39a13	12.1892	11.6171	11.3493	12.8835	9.60872	9.82072	12.7009	10.3017	8.37234	9.5025	9.03473	9.92907	11.1763	10.8802	10.4961	11.4732	12.5804	9.73044	12.9415	14.2946	15.9553	13.2262	15.2279	13.0955	15.1235	13.1946	15.491	14.6633	10.0135	12.9124	13.3192	13.2067	10.717	11.9696	11.8465	10.3566	20.0793	22.2043	17.2155	20.2457	16.3036	15.2069	15.9907	17.4914	19.0889	12.0444	11.2221	14.6958
ENSMUSG00000002107	Celf2	32.5767	38.4134	34.6117	40.2367	42.0014	44.58	32.3408	40.1324	38.6781	32.217	32.5621	28.3376	41.6971	41.2595	38.0994	40.1709	40.4372	35.2963	28.6973	29.1486	29.8209	35.4827	34.5878	35.3033	47.6052	48.7279	48.4308	4.30477	1.49636	5.62695	2.57494	6.31333	7.73819	4.77141	5.15024	5.5425	8.72107	7.54654	6.55274	8.75777	9.29373	7.27656	16.5493	13.091	9.21587	34.3342	37.3906	34.292
ENSMUSG00000002108	Nr1h3	1.10225	1.02807	1.219	1.41355	0.731989	1.10457	1.54078	0.842885	0.929325	0.629403	0.619605	0.370517	0.591324	0.425902	0.58598	0.889541	0.458256	0.616317	0.394988	0.368445	0.462173	0.311606	0.53362	0.345384	0.297604	0.501059	0.332468	1.04652	0.279356	0.407766	0.497445	1.28863	0.861373	1.13111	0.903934	0.758778	1.08249	0.935055	0.809149	1.64782	0.689304	0.994131	0.616446	0.749712	1.36862	1.39359	0.950285	0.9048
ENSMUSG00000002109	Ddb2	12.6226	14.5232	14.6077	11.778	13.0957	12.9817	11.8794	10.9696	12.3773	10.1876	10.353	10.7619	11.5503	10.8386	11.8684	13.9202	12.2095	12.1984	13.5451	13.2761	13.1896	14.5508	14.515	14.8649	17.1269	16.3239	16.2688	4.74882	4.01752	4.90738	8.58588	7.62802	7.62118	7.6315	7.51053	8.99269	10.1688	9.70294	8.25411	13.1004	10.2563	10.9686	11.0033	11.2307	11.2643	13.6642	13.3347	13.2123
ENSMUSG00000002111	Spi1	0.379264	0.446929	0.27581	0.245942	0.026952	0.191374	0.585524	0.2061	0.542715	0.579194	0.192823	0.209599	0.254996	0.34496	0.423147	0.146605	0.129228	0.369149	0.716684	0.191393	0.27301	0.128897	0.412558	0.100014	0.131668	0.170326	0.500557	4.41446	3.84688	5.27542	2.89606	4.49231	2.65669	1.505	2.8992	2.32439	2.76778	1.93125	1.95562	2.28499	1.26023	1.45123	3.43955	1.72215	1.78183	1.54653	0.611208	0.556668
ENSMUSG00000002129	Sf3a1	99.8779	109.176	97.969	94.3444	97.9364	97.4162	103.838	102.511	91.0065	89.4718	89.6507	90.7792	97.2035	93.2208	95.1907	98.129	92.0551	88.1044	76.2339	88.0813	97.9679	89.3385	96.502	95.706	88.1486	94.6775	98.5593	111.234	89.4242	101.222	111.452	115.899	111.842	117.652	123.638	115.342	101.675	100.826	92.5043	104.814	105.125	105.685	106.983	87.0189	105.159	93.0334	94.7697	88.5291
ENSMUSG00000002147	Stat6	3.12995	3.05661	2.87887	5.72261	6.55009	6.99411	7.21394	5.59438	5.57179	15.0891	14.4044	15.2748	13.4688	13.2102	11.8778	13.2853	12.463	12.1761	19.8973	18.4299	20.3846	19.2464	19.6264	19.3003	16.8931	19.7753	20.0767	5.97248	5.61237	5.98622	7.22814	7.47487	7.57529	7.32414	7.12983	6.25915	8.48069	8.46609	7.064	8.09118	8.21132	7.24392	8.06618	7.61749	7.62266	4.43269	4.07909	3.93324
ENSMUSG00000002190	Clgn	0.739026	0.515376	0.79108	0.323927	0.3205	0.278786	0.319317	0.210872	0.252494	0.234105	0.286867	0.344225	0.415264	0.256345	0.261755	0.287811	0.341893	0.445956	0.157966	0.229494	0.241115	0.426349	0.400214	0.273599	0.403854	0.626515	0.430592	1.92079	1.97753	2.80218	1.37839	1.36441	1.48449	1.31031	1.78797	1.58911	5.41548	4.96499	4.52799	3.68255	3.75834	3.4005	2.62772	2.02591	2.30548	3.65618	3.37106	2.93649
ENSMUSG00000002204	Napsa	0.0213175	0	0.0164586	0.0854568	0.0564428	0.141703	0	0.0193931	0.095213	0.018276	0.0205123	0	0.0657533	0.0401941	0.0405934	0.0182841	0	0.0209807	0.0709922	0.0177776	0.0328977	0.0181972	0.0351347	0.0564632	0.0388412	0.0364506	0	0.118141	0	0.180368	0.545892	0.20955	0.213921	0.0619688	0.306804	0.161026	0.257569	0.304622	0.213757	0.289604	0.289502	0.190926	0.253631	0.207468	0.35384	0.071482	0.0166583	0.0480283
ENSMUSG00000002205	Vrk3	63.4719	56.5257	54.5058	50.4954	53.3354	52.2242	56.4347	50.7609	45.406	38.329	33.4228	42.4547	36.7369	41.1729	45.7714	38.1602	39.5686	40.5303	33.167	31.4732	32.0435	33.3581	34.3328	32.3899	30.8851	36.5185	36.3142	49.8699	32.7799	45.1206	31.8628	40.6957	45.0053	43.0946	48.8668	42.6489	40.6327	41.4231	34.9625	37.809	34.5381	38.0939	38.8008	33.4244	36.556	55.3274	54.2912	49.2981
ENSMUSG00000002210	Smg9	21.1737	19.8674	19.5276	18.6448	18.876	20.3474	23.0922	20.418	16.0822	15.7403	15.8679	17.6854	18.3981	19.1576	18.8446	17.5071	18.5509	16.8373	17.3886	19.6267	20.6382	20.5847	20.0659	21.7679	20.4736	19.442	22.7639	16.0161	17.1687	15.8866	13.8962	14.3625	14.688	17.1001	15.1773	14.3406	15.0509	15.1183	15.1902	17.0209	14.8934	15.8221	15.4941	14.4119	15.9068	18.6204	18.0227	17.9181
ENSMUSG00000002221	Paxip1	34.7418	35.9356	35.0019	32.8496	34.3863	36.7783	38.5968	35.314	31.6194	31.4237	29.2792	31.2414	30.8285	30.8569	29.355	29.7945	30.0548	27.1213	32.4992	30.0374	30.2948	32.4102	32.6147	31.9568	29.6725	30.2159	29.8487	34.571	23.4995	34.7452	36.0503	35.2674	34.2412	34.5654	33.5962	32.7733	28.9128	29.982	28.1288	29.9011	29.1323	28.2851	28.3043	28.5971	27.2679	28.0564	27.5251	27.4454
ENSMUSG00000002222	Rmnd5a	51.2639	54.0413	55.2808	64.7748	67.1335	62.6668	52.8282	59.988	63.4463	78.8796	78.8626	76.9049	73.6888	75.18	74.0464	69.8449	69.7679	68.4953	63.6744	58.3623	60.182	62.3587	60.2252	55.9539	56.5747	57.7434	52.6703	51.1814	41.2028	51.6355	51.3679	53.4955	54.4192	50.6046	48.8359	48.6209	62.8547	57.4712	52.777	55.3119	63.2925	51.5029	52.9393	53.8588	51.5702	64.411	65.2895	60.5538
ENSMUSG00000002227	Mov10	24.9042	24.3295	20.5543	22.7795	21.7783	22.4641	24.2312	22.5886	19.3705	18.0268	15.4318	15.6687	22.7342	21.4022	21.4243	26.3145	25.7765	22.2824	17.0666	19.0724	22.6811	20.0121	22.2097	22.4233	21.9435	23.7772	26.5408	17.4184	13.9596	15.1145	17.9372	17.9697	16.8161	29.877	28.1729	27.9499	26.2298	23.9063	23.9408	29.9503	28.2431	27.6593	37.7601	36.0294	36.9328	44.7335	40.9695	38.609
ENSMUSG00000002228	Ppm1j	0.679989	0.536235	0.610263	0.324376	0.486403	0.442808	0.397343	0.525944	0.459545	0.927993	1.11272	0.854426	1.01906	0.916537	0.807848	1.08629	0.640258	0.959988	1.44016	1.9936	1.91547	1.71707	1.42499	1.60698	1.83219	1.33171	1.78075	0.831181	0.74812	1.22572	0.605387	1.17038	1.10409	1.03147	1.03586	1.51031	1.2035	1.40972	1.13162	1.39625	1.23131	1.21737	1.29518	1.16956	1.31198	1.83169	1.25757	1.06281
ENSMUSG00000002233	Rhoc	81.6422	78.4615	79.5775	61.6982	58.7905	63.394	53.3713	46.7011	44.6525	39.1959	33.9047	40.6027	40.8459	39.9591	48.5523	40.4012	44.5123	38.4096	43.2737	47.2218	48.1476	39.316	40.1166	43.3245	37.6051	43.5345	43.1477	145.102	135.309	127.45	171.404	151.896	158.68	200.983	198.623	201.028	121.362	133.395	107.385	149.672	138.254	146.069	147.785	134.646	158.272	107.729	102.237	99.4506
ENSMUSG00000002240	Prr27	0	0	0	0	0	0	0	0	0	0	0	0	0	0	0	0	0	0	0	0	0	0	0	0	0	0	0	0	0	0	0	0	0	0	0	0	0	0	0	0	0	0	0	0	0	0	0	0
ENSMUSG00000002249	Tead3	60.841	60.8056	59.9715	82.6384	83.2254	100.334	92.3557	80.3801	64.3276	73.0553	75.9146	82.6003	73.305	78.921	72.9893	72.2866	78.866	71.134	66.4448	70.3088	65.7741	68.5038	65.0705	72.8218	72.9101	66.3166	79.3753	20.9179	16.2025	21.9458	23.0014	18.6371	17.5369	28.0006	22.9417	23.9117	42.3136	42.1999	40.7077	49.2228	45.2834	41.7507	48.2252	43.3312	44.6111	58.2386	56.8052	61.5361
ENSMUSG00000002250	Ppard	14.5063	13.166	14.5961	14.6162	13.7176	15.7291	17.8778	16.1219	12.5389	14.6829	14.1876	15.0823	18.0761	16.8128	15.1188	16.0685	16.5842	14.2713	22.1247	21.9094	22.2858	22.0704	23.2291	20.5541	20.9346	21.8596	22.5085	18.5611	10.9371	16.5705	21.9225	15.8897	15.5503	15.7389	15.3604	14.6581	18.6387	20.4445	16.4826	18.722	18.0031	17.7591	18.5442	16.0556	18.117	13.0378	12.8254	12.0179
ENSMUSG00000002257	Def6	1.95953	1.75533	1.87912	3.9914	3.95553	4.00784	4.31153	3.92927	3.57064	5.61647	5.51007	5.3705	8.9524	9.90773	8.6969	7.32447	8.04081	8.05534	9.63476	11.0138	10.255	11.372	11.7181	13.2455	12.4053	11.7313	14.3569	2.32973	2.521	1.62276	1.99663	1.90585	1.61781	2.08768	1.73048	1.77662	4.2389	4.69074	3.21266	4.06096	2.65537	2.97317	3.67794	3.33896	3.63572	3.27742	3.17493	2.91399
ENSMUSG00000002265	Peg3	66.0051	73.0347	62.0305	81.3801	94.2271	80.9589	83.0145	90.2101	88.4781	49.3187	54.4547	45.773	65.7274	66.7555	59.9079	66.5838	71.6448	64.3691	49.75	52.872	57.4685	57.4049	64.7993	65.4917	57.7025	59.7908	66.9875	92.121	51.8841	86.2	185.093	198.533	187.207	329.405	353.101	327.743	89.5912	81.983	78.9886	53.9759	74.2423	58.0871	308.173	268.176	279.419	58.3512	62.8235	57.8346
ENSMUSG00000002266	Zim1	3.51866	3.77743	3.48996	8.04438	8.89951	9.49507	7.28065	8.81935	9.02429	3.08297	3.54409	2.69328	4.65121	4.86124	4.96896	6.10312	6.01051	5.38695	3.10979	3.07347	2.85218	4.31363	3.75544	3.88365	4.96326	4.03137	4.16101	1.20547	0.404822	1.04401	3.01804	3.97859	3.30765	11.9702	14.1494	14.5058	1.31993	1.08912	0.82644	1.33297	1.53562	0.920086	24.6775	19.8157	17.8334	1.73334	1.90031	1.81597
ENSMUSG00000002274	Metrn	102.776	92.5255	93.0481	37.7409	33.2973	38.9545	27.1601	21.4735	18.98	20.5094	19.2133	23.1776	26.5928	28.9619	26.7593	20.0988	22.7116	20.7348	16.6324	19.443	12.8689	20.096	15.6759	20.3301	18.581	16.1993	17.2547	228.062	250.978	210.467	208.394	154.156	145.181	111.731	93.5046	95.7948	68.5041	97.1726	92.1579	81.5467	70.1692	93.1696	63.8334	66.7811	67.5255	41.803	45.1604	41.3127
ENSMUSG00000002279	Lmf1	15.4433	13.4842	12.836	15.013	15.4625	15.4419	19.449	15.8133	12.6478	13.3227	11.5678	12.9183	14.7742	15.4308	14.8973	15.221	15.3975	13.5397	14.3704	15.4488	16.9905	12.4636	13.1511	13.9248	15.7026	15.1273	16.584	21.3496	22.2718	18.3309	17.5698	14.8503	14.1588	14.7714	13.3881	13.0573	21.7866	22.0645	16.8045	16.7691	16.9961	16.6108	16.2647	15.1774	15.9686	14.273	14.8183	14.8258
ENSMUSG00000002280	Narfl	19.4359	17.216	17.8838	18.208	15.6701	16.6036	18.8328	18.689	17.3115	19.9717	17.9747	23.261	19.9298	22.2596	22.8689	26.4287	19.547	20.6267	21.2431	22.3052	19.6474	17.7204	18.045	18.6439	21.5765	21.9247	18.2546	14.6338	11.73	14.1095	10.9025	15.9752	15.5511	16.6653	14.7263	16.6256	19.3596	17.1219	14.3526	17.4965	15.998	19.3232	17.8001	15.8099	17.8202	22.2463	21.8973	21.3455
ENSMUSG00000002289	Angptl4	4.48714	4.07336	4.35034	5.12343	6.65842	5.22076	6.96905	7.44143	5.78586	5.93508	5.44483	5.1958	5.54447	4.79816	5.26024	7.52357	6.49572	7.52664	4.40838	5.09997	4.37226	4.47901	3.88213	4.11856	5.38975	5.30718	5.68462	35.2818	36.2207	34.9745	32.1084	30.9008	31.7452	29.1439	28.4738	28.874	40.1505	38.5404	33.9278	36.3503	32.5662	34.1462	34.8944	32.698	33.6888	4.68199	5.11873	4.16914
ENSMUSG00000002297	Dbf4	94.6029	109.257	102.838	90.4163	96.1141	86.8577	92.994	101.713	113.697	82.0822	81.3572	86.4301	79.0437	81.1395	86.7377	84.3346	85.9877	90.9649	78.7232	75.195	75.992	76.6951	77.9853	78.8403	82.3181	86.5126	79.9504	116.56	131.948	125.516	114.629	121.343	130.056	116.761	124.808	119.959	85.5419	89.445	82.9849	90.1288	89.9772	92.542	84.4865	87.2062	92.1296	90.2622	89.2431	88.1455
ENSMUSG00000002307	Daxx	54.783	54.2311	53.0696	48.9783	49.2735	52.213	59.1761	53.9995	45.2943	45.8686	44.1641	47.3725	47.9293	48.4681	48.6705	49.6183	51.0611	46.0675	40.6033	40.5978	41.2037	41.1831	38.8919	41.6652	44.0755	41.2779	42.6716	51.0472	49.0545	48.7568	59.5256	47.6068	47.5846	51.6084	51.8335	49.651	49.4455	51.2057	42.4838	51.5578	47.582	50.2259	50.7079	45.8116	51.5775	54.0641	51.5709	52.5986
ENSMUSG00000002308	Cd320	57.6222	58.5602	57.5761	52.5738	50.6412	48.1791	60.4699	48.8687	43.7916	62.574	53.7498	62.9566	68.3848	67.0125	62.6937	58.8537	62.3135	58.7863	42.8139	42.294	40.5859	38.013	38.3345	43.5365	40.7277	40.8946	41.4088	42.7343	54.7339	47.2696	48.8549	45.7245	48.7893	54.8031	44.7518	45.9971	46.6379	56.5364	48.2467	52.3703	41.9302	53.6219	46.3961	43.0774	47.9553	65.1126	66.0659	61.9068
ENSMUSG00000002319	Ipo4	59.1565	63.7988	59.6293	55.276	53.8543	49.8902	52.3613	46.7512	49.4241	49.0692	54.7764	55.5834	57.6833	51.052	54.0204	52.7312	58.6509	53.2054	56.0958	72.2151	74.943	55.8619	55.6307	61.7307	60.4173	56.4999	66.825	90.1131	91.8219	75.3121	65.3181	80.2201	54.9002	62.4434	58.4607	56.7032	54.351	69.2759	59.9947	58.7322	59.6267	58.5362	63.3894	58.9005	63.3934	56.8938	65.9294	64.3424
ENSMUSG00000002320	Tm9sf1	47.1479	48.8577	49.0425	53.512	47.8801	51.989	51.2483	53.1643	49.5701	64.4827	60.6266	65.323	63.7501	62.4242	59.9838	65.3484	56.9505	57.3171	61.7642	64.1393	60.7783	66.1877	61.6513	63.618	65.336	66.7806	62.3329	43.5357	27.9442	42.4596	34.2291	44.879	40.0924	41.9232	43.6237	41.2901	59.7303	63.5264	55.045	59.7306	57.1956	56.7672	57.7012	55.6051	56.2416	56.1917	59.8077	54.227
ENSMUSG00000002324	Rec8	12.5116	12.6265	12.6632	7.44057	7.77665	7.80551	2.78307	3.3047	3.42991	5.6108	5.04215	6.73834	5.82814	5.84427	6.4594	2.29538	2.68954	2.74856	2.42009	2.47025	2.52389	2.70188	2.25113	2.41954	1.46402	1.53161	1.23447	3.94724	2.07263	1.44614	5.33317	3.87698	3.44874	3.62445	4.36729	2.99272	5.15701	4.21442	3.80391	3.97814	3.28456	3.06988	8.08871	6.92753	6.5009	15.5178	13.0859	14.6412
ENSMUSG00000002325	Irf9	9.60812	10.4932	9.69456	10.2544	9.71777	10.8557	10.4596	10.1577	9.72555	10.8619	11.2987	9.8793	12.1049	12.3966	10.4515	12.7646	11.5926	12.0682	10.043	11.017	11.9841	9.40211	10.8276	11.601	10.9139	10.5382	12.0888	9.22677	7.82231	7.04145	7.17191	8.65002	7.87258	8.58091	8.12339	8.75598	10.8555	9.68201	8.45384	11.567	9.49464	8.5181	10.5741	8.60011	9.03338	10.8123	10.8468	10.5225
ENSMUSG00000002326	Gmpr2	35.4779	34.8445	33.1661	32.3287	34.2791	30.8246	39.9476	35.5282	32.822	32.4713	29.5886	31.9116	34.0608	33.4741	34.189	34.7508	32.7931	33.8244	31.9143	33.9209	35.5689	34.4134	34.8231	35.9839	37.0884	36.6569	36.3058	40.4194	45.9535	42.9154	45.4701	43.5588	44.7967	47.066	50.3419	42.4963	43.4949	45.5324	36.2802	44.7248	42.0777	41.947	40.859	39.8724	39.4959	35.1332	35.3669	32.884
ENSMUSG00000002329	Mdp1	31.777	29.0613	31.5238	30.6295	33.1047	30.7092	31.7869	29.3432	29.5271	33.2419	31.2094	32.3167	35.9608	36.6263	38.7138	34.9982	34.9739	36.9097	33.118	33.0221	33.7268	30.4665	33.7735	33.6586	34.9264	33.7164	35.8428	31.1329	44.3449	30.6679	37.9558	33.5869	32.8739	33.4562	35.4905	30.7939	40.7559	43.8469	39.3565	43.4425	38.262	42.154	38.07	36.183	41.2475	33.2126	33.5172	32.5878
ENSMUSG00000002332	Dhrs1	77.1043	76.0196	76.0337	68.6772	65.8893	74.0501	57.297	63.1404	50.1749	70.4906	70.8275	79.0973	70.9122	74.0105	81.1155	66.2478	66.4191	68.2716	78.3279	76.7217	80.8087	76.2373	81.6167	74.3257	72.8626	79.6596	85.5726	69.0739	77.5013	63.9482	53.2968	63.6134	67.89	64.2236	77.3017	69.4945	77.1511	82.3096	70.9733	85.2482	80.5587	83.3428	80.7073	70.4916	76.5669	82.4907	77.4338	85.1076
ENSMUSG00000002341	Ncan	1.13399	1.03013	1.16879	0.39915	0.255956	0.323564	0.29859	0.135913	0.18559	0.190735	0.241561	0.170753	0.270362	0.212207	0.249281	0.224921	0.190271	0.197634	0.0419204	0.0769817	0.0955055	0.0423616	0.0412774	0.0441132	0.0276949	0.0258099	0.0333717	0.239208	0.107012	0.179283	0.257357	0.345294	0.174719	0.262909	0.316065	0.287576	0.796513	0.735923	0.621004	0.786589	0.669344	0.621671	0.43914	0.488025	0.482761	1.80934	1.80802	1.64723
ENSMUSG00000002342	Tmem161a	45.5454	36.0728	44.5471	47.7666	46.5424	50.7698	52.8875	46.9686	38.2656	41.981	40.9265	45.5115	46.2273	47.9055	48.8152	44.7467	47.7165	41.8353	53.2874	48.0867	53.4934	53.0666	51.4121	56.8468	53.991	49.5975	52.863	43.5267	30.687	40.162	36.9159	37.8296	33.1537	36.3523	32.1729	33.9329	44.1473	47.0337	40.7484	47.3679	46.795	44.4181	43.2091	38.5754	40.0793	37.9349	38.8677	37.9271
ENSMUSG00000002343	Armc6	15.4667	12.7101	13.5556	9.08367	8.31333	10.0316	13.0328	11.1885	8.27866	10.2682	10.5314	10.0739	10.4444	10.4005	10.6494	11.1055	10.217	9.6634	7.79546	8.63797	9.24434	9.17303	9.30482	9.01312	9.46161	10.0154	8.76056	13.433	19.2646	14.317	11.685	12.6238	11.597	13.9076	10.6092	12.2715	13.7731	16.5936	15.4537	14.6404	14.9449	15.9134	15.4144	16.1935	16.9741	17.1026	17.5588	16.6942
ENSMUSG00000002345	2310045N01Rik	68.977	62.2459	61.2075	64.5304	62.7076	71.421	70.7033	59.1093	56.2712	71.9461	67.1687	73.6826	72.3916	73.0195	68.595	72.0181	64.6297	59.6875	69.6539	69.9902	76.1049	70.5971	71.3987	73.0258	68.128	73.262	71.7043	43.712	38.2671	37.1073	44.3914	43.9248	48.3953	46.9425	46.466	45.606	51.6758	53.1976	46.7476	64.4999	52.0253	53.447	58.734	46.3557	53.6945	73.1423	72.9171	68.6566
ENSMUSG00000002346	Slc25a42	1.80783	1.27222	1.61943	3.68075	4.3773	4.77646	3.30257	3.82253	3.64353	1.44113	1.58461	1.23147	1.8941	2.27739	1.50866	1.93029	2.19085	1.95574	2.12043	2.59898	2.3311	2.92173	3.29598	3.12621	3.58369	2.84149	3.37838	0.9171	0.529921	1.09732	0.515736	1.02614	1.16121	1.075	1.01875	1.0456	2.08799	1.79427	1.40578	2.51744	2.35216	1.8342	2.293	2.17214	2.15409	1.91042	1.71686	1.65061
ENSMUSG00000002365	Snx9	22.8158	23.3818	23.3577	21.675	23.3603	22.383	25.2262	24.7341	23.426	25.5732	23.4792	24.2456	22.8469	23.7489	23.3389	25.2519	28.3951	24.2002	20.9582	20.7473	19.3224	18.6435	19.495	19.4369	20.0828	21.1233	19.8107	26.6733	17.6003	26.0939	31.0121	27.2919	28.6014	26.4717	26.8392	24.9496	29.0811	29.3859	24.1876	27.7321	27.2901	26.3543	28.9123	24.7556	26.8377	25.9687	25.5578	24.4279
ENSMUSG00000002372	Ranbp3	92.1693	87.2114	86.5391	78.8253	81.533	83.4738	100.445	90.964	77.7371	77.0392	70.8438	81.7977	81.0178	81.2884	85.8476	87.579	81.7005	78.1051	64.0793	69.9244	69.8136	63.7927	67.2162	70.9832	73.0318	73.1686	76.7448	98.7702	95.919	91.3951	111.529	95.7775	98.9399	100.704	97.5776	92.8114	93.767	99.7302	87.6951	99.8119	94.4835	101.392	100.249	90.6455	99.5456	91.8668	90.642	86.5587
ENSMUSG00000002379	Ndufa11	26.0615	23.1427	22.8368	23.3281	22.557	25.578	34.7861	26.2196	22.5858	27.7548	23.8187	29.6081	31.757	31.1888	31.4161	32.4382	29.4458	27.4061	25.6725	27.343	30.3663	28.4796	29.6031	27.302	26.9945	26.4051	26.8739	22.8977	29.4131	22.7105	21.2968	19.6554	19.9054	22.0751	18.6376	20.0214	25.1562	28.6493	24.2636	29.5313	24.1101	27.9054	26.5452	24.1795	26.9388	27.7581	27.7995	26.1417
ENSMUSG00000002384	Bmp8b	1.89195	1.71887	1.67281	1.57137	1.83946	1.89339	2.23172	1.91497	1.93802	3.5071	3.5214	3.42052	2.11821	1.9741	1.80046	3.63947	3.5038	2.91242	2.48828	2.92108	2.9055	2.22592	2.25425	2.53236	2.38297	2.7686	3.02972	0.0946222	0	0.0192561	0.0627478	0.0744867	0.0371735	0.120023	0.0238101	0	0.103707	0.0182581	0.0767915	0.037023	0.00869204	0.0550871	0.095707	0.0724336	0.0938479	3.18866	3.26167	3.04665
ENSMUSG00000002393	Nr2f6	147.025	110.038	119.57	88.8242	83.4181	90.7929	91.0455	79.4191	78.9335	75.1623	104.83	117.889	92.8777	92.2855	95.7452	85.3611	117.101	92.9936	77.8857	94.761	63.5147	74.4671	62.1533	75.3615	84.8368	69.0531	86.7556	69.4606	74.351	70.0731	86.7672	76.5063	59.296	68.0482	61.499	62.3748	57.02	72.9833	68.5832	58.5044	60.0201	66.0525	52.0428	49.0489	56.9087	115.475	128.644	143.332
ENSMUSG00000002395	Use1	84.1172	79.9525	82.6001	83.5962	80.5426	77.3195	83.3327	72.6706	66.2983	90.27	77.2411	93.4782	93.2668	95.338	99.1895	100.65	98.6316	99.153	78.3063	79.2017	81.3977	74.1562	79.4365	74.7443	86.3951	82.161	85.2267	65.2805	88.4298	64.18	72.1694	65.164	70.6909	76.353	73.6251	68.642	84.8577	102.917	81.9487	92.3566	77.0869	90.7226	97.1969	86.3694	96.3521	112.596	110.014	110.733
ENSMUSG00000002396	Ocel1	0.599739	0.258147	0.694019	0.431372	0.452969	0.742883	0.614541	0.755011	0.702524	1.04724	0.914743	1.02396	1.11901	1.02653	1.41518	0.813509	0.970432	1.72848	1.19252	1.58325	1.68917	1.31415	1.56121	1.82613	1.48024	1.52935	1.68149	0.51443	0.383222	0.32992	1.93402	0.201307	0.548869	0.847061	0.397698	0.350326	0.911214	0.812669	0.790022	0.882446	0.684106	0.940911	0.67554	0.644593	0.725399	0.92807	0.98563	0.979009
ENSMUSG00000002409	Dyrk1b	30.5054	29.0948	27.4808	28.7589	27.6595	35.0925	26.421	24.5301	18.5457	23.5272	24.8508	24.4246	21.9091	22.5037	21.1766	22.3547	25.4739	21.1763	18.6465	21.6947	17.4341	18.1532	18.4212	17.9702	16.7009	18.4734	19.3687	15.7423	12.1428	13.5381	17.5979	18.3405	16.6493	21.6157	20.1682	19.1107	23.1643	23.2871	20.7388	21.3305	23.6482	21.4447	20.8388	21.0328	21.1763	27.2064	28.9806	27.2084
ENSMUSG00000002413	Braf	16.5829	17.2914	15.0243	14.4298	14.3791	13.4907	11.7271	12.5273	12.8953	13.8585	15.3611	13.1303	11.4869	11.3794	10.9264	10.9342	10.9359	10.8458	10.8016	11.0366	10.3376	11.479	10.6171	10.2645	9.94135	8.73088	10.0164	16.2397	7.99598	14.6391	13.8391	15.2851	15.6222	13.875	17.4957	13.8016	12.5379	10.806	10.887	11.205	13.379	10.0629	10.5619	9.52785	9.66631	13.9503	13.6869	11.9508
ENSMUSG00000002416	Ndufb2	92.0032	86.9523	87.5023	88.0476	88.4867	78.95	101.005	89.2766	85.4196	119.6	116.561	138.665	147.12	129.74	131.164	128.743	150.506	120.746	78.4135	102.42	58.4961	96.2535	72.5386	103.861	99.4424	89.1792	103.92	88.3155	106.235	96.23	93.1178	85.1797	102.365	101.494	88.9215	83.5724	122.029	152.896	132.412	152.905	124.159	155.038	137.158	127.506	145.29	139.448	128.718	120.813
ENSMUSG00000002428	Hltf	20.2422	21.0643	20.3393	22.1309	22.0208	21.4148	21.407	24.3696	26.079	25.7772	26.5745	24.278	25.4229	25.8696	25.8414	26.595	27.1657	28.7184	23.5688	23.008	23.6109	25.0155	23.8916	24.6352	26.1648	25.7924	27.9181	10.7184	9.81492	12.8735	11.316	13.726	14.579	13.3889	14.5539	14.2819	11.4788	9.72368	9.67091	11.0325	10.3446	10.6101	9.45368	9.44656	10.5487	22.0784	22.2279	18.3932
ENSMUSG00000002455	Prpf6	62.1225	64.2885	60.2958	58.838	62.806	57.7839	62.9997	61.5231	57.4879	57.5434	56.6302	61.2885	57.2677	58.7327	58.1453	59.7661	57.2309	56.2764	42.9729	44.7528	49.8037	44.6175	47.0343	45.6987	47.2389	50.818	49.1714	57.7321	54.7545	55.3612	64.8215	61.4253	59.4451	60.2795	66.3075	57.9199	56.9512	57.3679	50.1734	58.1	58.8866	56.7488	59.0372	49.3973	56.2518	66.3678	63.704	60.0287
ENSMUSG00000002458	Rgs19	49.69	51.0927	50.5821	55.3754	48.5007	49.3227	61.0359	51.1564	46.3824	45.8741	47.5675	45.6	54.8846	55.2174	51.1561	52.8527	48.2851	53.9594	49.701	51.7656	52.9205	49.9063	50.2551	51.0303	55.3898	52.0865	49.2097	58.6313	107.425	58.7977	56.8217	63.5738	59.1439	62.6353	54.3247	63.0123	57.0564	62.6238	54.1872	64.5146	60.5995	63.4144	59.8865	56.6664	57.1605	41.2109	46.2495	42.7849
ENSMUSG00000002459	Rgs20	5.87347	6.55167	5.26198	0.801732	0.226479	0.154426	0.161741	0.468422	0.299135	0.136129	0.0980395	0.193674	0	0.0161745	0.0367343	0.0170018	0.0628164	0	0.0547688	0.01401	0.0130396	0.0319195	0.107679	0.0148364	0	0.0140718	0.0323651	0.516263	0.705199	0.748173	1.68182	0.470583	0.259525	0.486411	0.24643	0.363918	0.440519	0.196935	0.126773	0.455853	0.162691	0.127287	0.101487	0.129634	0.191352	8.74818	8.00575	8.25592
ENSMUSG00000002475	Abhd3	1.86282	1.37836	1.62111	2.05615	2.66708	2.48716	1.81985	1.26988	1.27203	1.26748	1.18382	1.02132	0.944878	0.969684	0.778144	0.60887	0.717821	0.514396	0.790664	0.655467	1.01965	0.950992	1.10382	0.862218	0.777683	0.656792	0.810517	0.470012	0.205638	0.377213	0	0.338893	0.399177	0.401687	0.249865	0.32244	0.395723	0.407287	0.545182	0.254082	0.318778	0.20204	0.28583	0.24434	0.206007	3.05391	3.08174	2.52095
ENSMUSG00000002477	Snrpd1	367.059	388.741	359.635	351.738	405.939	369.509	395.675	423.146	471.201	328.271	315.622	337.194	343.902	333.32	408.692	342.477	335.945	354.029	321.005	338.895	313.671	362.218	342.046	368.998	363.968	347.031	336.325	473.079	663.721	559.088	677.982	546.12	717.392	526.444	693.122	571.901	322.912	351.755	318.951	345.614	327.089	386.521	341.341	325.984	366.236	303.584	305.141	286.341
ENSMUSG00000002486	Tchp	15.3748	15.9981	16.0732	15.9543	16.0622	18.384	15.9186	17.2785	14.4225	13.6889	14.7764	15.5138	14.5044	14.429	15.6667	14.867	14.8326	14.5788	14.7162	16.0359	15.0344	14.2162	16.8581	14.5144	17.0512	13.5289	17.5836	15.1619	15.9551	14.3646	23.9047	13.964	13.5423	13.8809	13.6048	14.6396	16.9695	15.567	14.4136	16.5777	15.9945	14.3951	14.9845	13.0016	15.0014	14.1348	12.9934	12.9906
ENSMUSG00000002489	Tiam1	29.1179	31.4617	28.4197	40.9029	45.7611	44.3792	40.7211	38.3286	38.8837	53.8877	51.6648	51.6496	52.3395	48.5698	49.4444	50.6875	50.7678	51.4128	52.449	54.2602	52.7364	50.5867	56.5826	52.8339	47.9402	51.1357	54.2637	22.4081	13.5136	20.7336	25.2008	21.5941	22.2425	26.484	27.9591	24.5544	25.8952	24.2025	21.1966	22.7314	24.4593	22.1069	31.8121	26.4232	27.2137	31.5213	31.7099	29.9855
ENSMUSG00000002496	Tsc2	27.8731	27.8021	25.9057	24.959	26.3759	27.3631	29.0099	25.8121	21.0157	29.1072	29.4642	29.6602	28.7735	30.3257	27.9035	27.5419	28.2672	26.5572	23.1482	24.34	26.8894	23.0568	24.4581	25.2579	21.7455	22.5769	24.2252	24.8188	14.6983	21.882	23.7707	23.368	21.5752	23.2755	22.259	19.5658	29.9916	30.0902	28.3385	28.9984	30.7318	27.8244	27.502	25.5244	25.6684	27.5503	27.9947	27.4173
ENSMUSG00000002500	Rpl3l	0	0	0	0	0.0292924	0	0	0	0	0	0.031572	0	0	0.0314786	0	0	0.0315143	0	0	0.0275682	0	0	0	0	0.0295796	0	0	0	0	0	0	0	0	0.0322832	0.0323585	0.0558187	0	0	0.0537946	0.0621467	0.0577339	0	0	0	0	0.02788	0	0.0177848
ENSMUSG00000002504	Slc9a3r2	10.2604	10.6776	11.2443	11.0806	12.0016	14.0381	14.6895	13.381	12.5589	12.5929	12.2103	15.0498	12.5875	12.5118	12.074	13.8666	13.1702	14.847	14.2206	14.1177	14.3458	13.7468	14.02	12.672	11.2662	11.0069	11.3753	28.097	31.2274	26.3668	18.6343	19.2171	19.6057	21.5975	18.6537	19.8348	35.2323	37.8536	33.382	31.0511	27.0255	27.2004	30.1962	29.8124	29.7757	8.71205	9.66666	8.97114
ENSMUSG00000002524	Puf60	188.386	190.532	189.007	196.944	197.206	201.627	233.061	216.231	180.224	205.346	187.907	212.934	213.352	214.787	210.821	216.143	207.095	201.784	175.209	186.214	196.411	175.302	180.353	192.974	177.653	189.379	200.322	183.927	212.076	174.947	183.711	173.817	167.528	192.157	174.461	175.89	182.968	201.505	182.549	198.916	180.36	184.905	189.733	188.594	184.944	206.472	204.042	202.633
ENSMUSG00000002546	Golga2	28.8947	30.3597	26.3587	28.5216	31.5508	30.4405	32.1325	31.9671	28.9776	32.8264	31.8351	31.6042	28.5343	29.731	30.1666	31.1172	32.607	34.6303	34.441	34.5239	37.0091	31.5116	33.8225	34.8536	34.9117	35.2913	37.4383	25.3713	17.3886	24.5368	25.9814	25.0632	22.9477	26.6029	28.7582	25.9474	29.9033	26.8453	24.6813	28.7045	29.0452	26.2433	29.0261	24.5189	26.5769	30.3675	28.7792	25.6982
ENSMUSG00000002550	Uck1	42.3815	44.8702	44.3189	38.5259	37.6773	39.3421	39.3585	37.7628	35.2063	38.1905	36.432	38.9953	36.2537	40.5795	40.4496	37.1742	36.5612	35.9	27.6463	32.3644	32.8271	27.9621	29.7985	33.2768	30.8648	30.0267	33.7356	35.7663	36.4787	30.9558	37.5237	30.2607	33.5238	33.2132	30.3696	30.8846	36.527	39.1157	33.654	40.5662	39.4991	38.2479	38.879	38.4685	37.8752	51.1268	49.6774	48.0643
ENSMUSG00000002565	Scin	0.0336902	0.0186192	0.0518331	0.105936	0.00850371	0.0717954	0.126024	0.161269	0.0781843	0.0836504	0.167087	0.0726047	0.155742	0.0365842	0.0722479	0.129896	0.0820284	0.0973189	0.176183	0.231296	0.170708	0.161915	0.107803	0.0759729	0.0390948	0.0721552	0.0645342	0.0104425	0	0	0	0.0398199	0.0304712	0	0	0	0.048603	0.0202046	0.0101327	0.321364	0.159375	0.155722	0.140007	0.115583	0.046171	0.0558316	0.0430539	0.0347666
ENSMUSG00000002578	Ikzf4	4.93282	3.88926	4.25619	6.4944	6.93703	7.89628	6.28466	5.92537	6.06416	5.81206	5.62845	5.5067	5.09253	4.74128	5.40981	5.59892	5.10331	5.22803	5.5437	5.92086	5.05447	5.12839	4.52518	4.52334	4.90129	4.79294	5.95209	4.71155	2.5072	3.94245	3.81562	4.50676	3.97379	3.70551	3.62473	4.57732	7.43394	6.80031	6.55112	6.54572	7.34784	5.01555	6.11362	5.41505	5.14471	3.86463	3.72878	3.73983
ENSMUSG00000002580	Mien1	80.05	80.4505	77.6759	61.1076	61.0913	68.7985	80.6288	66.589	70.2072	62.6871	57.898	64.7072	62.9248	57.9977	63.4012	61.3983	54.9945	62.6784	60.3773	60.5329	63.4652	64.3917	64.0979	63.7995	60.8607	57.5566	60.1971	56.7828	75.2725	60.2893	59.1825	57.2101	61.2167	66.1735	58.7408	58.9711	45.462	47.2604	47.5534	50.3963	45.1952	54.4809	46.735	46.2681	45.7558	81.9633	78.1691	79.1325
ENSMUSG00000002588	Pon1	0.0832507	0.0172977	0	0.163061	0.143641	0.316386	0.347011	0.216059	0.21692	0	0	0	0.0314208	0.0388525	0	0	0.019061	0	0	0	0	0	0	0	0	0	0.0193706	0	0	0	0	0	0	0	0.0593637	0	0.0559164	0.0188042	0	0.0189171	0.108285	0.0188108	0.0348439	0.0195617	0	0.236123	0.316497	0.247444
ENSMUSG00000002602	Axl	29.2122	23.3056	23.1022	54.636	53.4731	52.7028	59.0043	49.4971	42.2721	54.9896	55.4524	62.1331	48.7797	49.4722	50.143	53.339	50.2969	47.9061	39.7063	39.8514	39.6686	38.3378	42.7134	37.742	39.8857	46.0278	41.7972	13.3615	7.19405	9.78079	25.0002	11.8896	16.5453	21.5331	23.8836	22.7736	36.9137	35.6166	31.4439	41.5851	37.9222	33.746	54.6462	47.5687	44.9506	32.8801	30.7933	31.0872
ENSMUSG00000002603	Tgfb1	3.30044	2.59443	2.56273	4.21328	3.98176	5.06444	7.24397	6.57571	6.39991	7.82656	8.28462	8.18824	7.88832	6.56079	6.92432	8.40671	8.40397	6.46752	13.0298	15.4964	11.6051	11.5278	9.55912	13.0631	16.7564	10.3783	15.9608	9.87472	11.6118	10.9142	9.32955	9.90875	10.273	10.1452	8.09336	8.58979	11.3288	11.9292	9.99552	12.903	11.1842	10.5343	12.6564	9.91185	10.76	5.61958	5.94561	5.52741
ENSMUSG00000002608	Ccdc97	43.4607	41.7975	41.1319	41.1468	37.9981	44.5022	45.9522	40.4572	31.3658	40.0802	38.3113	40.4989	40.176	41.1417	37.1746	38.5405	38.6331	35.392	38.2538	41.5997	41.5911	38.6837	39.3414	37.8339	36.3386	39.9525	41.6029	33.7329	23.8333	32.8855	36.2215	32.9208	30.975	35.1769	31.6466	31.5296	39.3109	40.8171	36.6908	39.9649	41.7085	38.4239	39.4014	36.388	37.1508	41.8969	43.7086	42.0407
ENSMUSG00000002617	Zfp40	6.50733	7.05319	6.14705	6.04851	6.48884	6.54968	5.77578	7.63508	8.88538	7.11731	7.05474	6.17894	6.69653	6.81102	6.58258	6.58449	6.22508	7.84337	6.18969	5.41221	5.28711	5.37519	5.48672	5.30117	6.5227	6.26937	5.93167	8.49901	12.3272	9.82208	9.8938	9.12754	11.7446	9.25999	10.6342	10.2481	12.6759	10.254	9.88463	13.2345	12.3687	12.5233	11.0552	10.4644	9.86219	7.02508	7.13344	6.12466
ENSMUSG00000002625	Akap8l	20.838	19.856	19.5871	20.9589	23.6328	23.2946	20.3167	20.1374	19.3686	18.5623	18.0841	19.6275	19.14	19.5045	21.2498	21.4686	19.7794	22.3269	20.2563	21.3472	23.8079	19.9602	21.6656	23.1026	21.9667	22.6833	24.3465	17.3217	17.4046	17.9338	19.5099	19.1113	18.9514	16.9245	17.6811	17.2348	23.5604	21.3492	20.307	22.2053	21.133	18.3366	17.765	16.5621	17.4557	20.5914	20.6054	20.0559
ENSMUSG00000002633	Shh	3.27397	2.38393	2.62064	15.0248	14.0747	15.8472	41.1031	52.2918	59.3553	19.3603	17.4424	17.7253	17.0262	15.8858	16.4052	43.9607	49.2273	38.1869	32.162	52.0035	46.7571	44.0611	44.7896	50.3828	34.6764	23.624	31.9285	0	0.0307405	0.0104414	0	0.0446192	0.0100026	0.0630785	0.0103617	0	0	0	0.0299394	0	0	0.0199587	0	0.0206961	0.12733	3.29	3.18015	2.63662
ENSMUSG00000002635	Pdcd2l	39.5506	38.984	38.6523	26.8342	35.0513	28.7319	41.8654	34.3551	31.6532	29.5455	30.049	34.7936	30.6223	31.227	34.8269	31.5736	32.805	32.0544	26.2194	25.937	24.3265	26.3025	21.7572	20.8997	28.7746	24.0491	22.9825	41.7573	42.0065	32.6962	38.2623	35.0489	37.1415	46.2375	36.1055	38.032	30.5194	43.2656	39.2961	39.9627	37.4658	42.1379	43.6341	41.0213	42.9318	43.9743	37.5627	41.4282
ENSMUSG00000002658	Gtf2f1	87.4723	87.2836	85.0554	71.4762	78.5153	73.2795	85.8737	81.4346	72.869	65.1669	59.4061	62.893	65.1044	65.6276	67.8258	67.3386	62.9082	65.5845	63.6348	67.965	67.8939	65.7688	75.1518	73.9211	69.0211	69.5181	68.8602	88.0141	92.3146	81.4845	95.9819	83.6739	84.7497	85.6788	88.9716	79.6203	58.8801	61.9043	55.4134	64.0429	58.3301	63.0331	61.0012	58.4448	56.2051	73.6268	72.8259	69.2505
ENSMUSG00000002660	Clpp	80.59	80.0227	81.6211	69.4191	70.7741	72.0556	83.7943	76.9743	60.56	61.383	54.1232	65.6995	70.4697	66.4537	66.5947	67.1498	66.3077	57.2488	60.1191	65.6788	60.3704	60.7717	65.7354	63.5375	60.919	63.0158	66.1319	84.8712	110.036	77.5257	101.825	86.7298	85.6568	97.5047	81.483	78.9275	60.1062	69.611	60.4856	71.15	63.3231	73.4969	76.4505	70.5749	73.8924	70.5116	72.0007	69.6772
ENSMUSG00000002661	Alkbh7	27.2478	22.7286	23.5348	24.1067	20.0755	21.3339	29.6878	22.4132	19.5853	19.8945	21.2352	21.3008	28.1904	25.5717	26.8656	23.2667	26.941	23.0195	19.1285	22.0331	18.9601	23.7218	19.4983	24.897	22.8678	24.3058	26.7628	18.2832	24.6569	19.8576	27.4038	18.4124	14.7327	20.8897	15.2822	18.4926	20.6567	29.6249	23.8396	26.2351	23.2951	26.5735	23.7698	20.5668	25.4716	24.3557	25.5696	25.8354
ENSMUSG00000002664	Pspn	0	0.158133	0.071355	0	0	0	0	0	0	0	0	0.179921	0	0	0	0	0	0	0.145788	0.074007	0	0	0	0.0788027	0.156711	0	0	0	0	0	0	0	0	0	0	0	0	0.087135	0	0	0	0.0854264	0	0	0	0	0	0
ENSMUSG00000002668	Dennd1c	8.80922	9.3024	9.42458	10.1219	10.0659	11.4937	10.1879	9.15633	7.91044	4.79513	4.0009	4.33795	5.08823	5.88152	6.23174	6.22836	7.13268	6.6786	3.60771	3.94048	3.71172	4.13454	3.67889	4.48579	5.1958	4.66353	6.53584	0.209798	0.0439718	0.313888	0	0.229901	0.0966905	0.191911	0.0890847	0.156966	0.246719	0.138882	0.278589	0.247147	0.21196	0.267828	0.198212	0.288901	0.214759	9.82945	10.2976	10.8706
ENSMUSG00000002679	Med6	80.1004	85.4943	88.9005	89.0524	88.2006	86.7674	90.3701	96.0431	111.885	78.6178	80.7609	82.9443	77.8487	81.3307	84.9765	81.8832	77.5568	81.0058	78.7871	68.1635	71.9562	81.3288	70.3822	69.2442	83.0107	75.015	67.7087	97.9522	125.669	111.673	107.239	103.003	114.434	108.506	106.001	104.089	79.6543	80.461	75.0556	84.8651	81.5534	84.226	85.6773	84.9256	88.9212	76.6754	73.867	71.4518
ENSMUSG00000002688	Prkd1	8.89278	9.06742	8.73294	4.14054	4.29808	4.03921	2.89436	2.71367	2.86083	2.0592	1.95923	2.29855	2.04696	2.28006	2.57606	1.53322	1.76032	1.71474	0.91581	1.0679	0.935613	0.970128	0.790931	0.740158	0.969772	1.0423	0.931063	8.96539	9.4038	8.72895	10.4018	9.54713	9.35888	9.06945	8.7717	8.12257	12.0147	12.1716	11.4476	10.6225	11.3307	10.3942	8.59269	8.6315	8.92801	10.9797	10.7941	10.6597
ENSMUSG00000002699	Lcp2	0.057276	0.0990937	0.159441	0.0359906	0.180331	0.132332	0.0502733	0.0124407	0.0370982	0.0990357	0.0980754	0.109841	0.0892466	0.0669731	0.147799	0.0878738	0.217524	0.12808	0.286119	0.390771	0.311519	0.272217	0.207373	0.520459	0.161412	0.098342	0.146703	1.3439	0.835287	1.55365	1.99925	1.05282	1.59352	0.95248	1.22203	0.896719	1.57167	1.54203	1.23225	1.1467	1.26978	1.06155	1.2608	1.19955	1.15798	0.474508	0.351332	0.385654
ENSMUSG00000002718	Cse1l	190.21	204.417	190.834	172.679	193.731	162.929	198.665	194.774	247.277	164.198	155.149	161.104	158.152	159.657	169.112	167.861	156.826	159.542	144.085	138.884	136.605	142.581	148.329	141.518	148.63	161.468	141.547	232.93	284.714	271.837	242.179	294.953	302.777	237.821	265.218	271.172	187.955	172.488	162.704	174.537	182.335	173.022	168.714	159.339	179.314	165.785	168.635	153.913
ENSMUSG00000002728	Naa20	62.5607	63.9019	66.0664	67.8592	63.9977	64.7419	74.8712	77.1167	86.2319	69.5713	69.1741	70.805	82.949	76.3732	87.1084	76.0886	76.235	82.6784	83.9863	81.4746	80.2819	86.1878	81.1716	94.4401	91.6382	83.0932	88.1871	78.2659	101.659	89.0046	71.9841	87.4465	106.365	86.4041	87.436	85.9739	65.648	68.7168	60.8914	77.0542	66.8372	75.0359	77.5484	69.2466	77.2346	70.3317	65.4067	60.3019
ENSMUSG00000002731	Prkra	60.5466	53.9713	55.0439	69.944	71.1396	69.3523	72.6998	64.0914	73.7038	64.0389	62.6253	65.1597	64.1262	63.4546	68.55	68.1343	67.6366	67.2739	53.8453	52.3227	51.622	49.8569	54.2485	52.982	52.6254	55.8708	51.5377	68.0389	84.3902	70.9211	72.0362	80.8233	82.2619	68.2017	72.2102	71.4036	79.0767	80.9911	72.6778	69.9202	65.687	71.1431	62.6457	62.6685	63.9557	52.5748	51.062	51.082
ENSMUSG00000002732	Fkbp7	2.6387	2.90503	3.85733	6.99277	7.13639	6.19748	8.961	9.38246	9.78089	11.6424	9.22762	10.1972	11.4371	11.6749	12.8378	13.1157	11.6887	13.7774	18.2924	15.0792	15.4786	18.2849	14.6117	13.2239	18.2862	17.1764	14.9745	24.4216	31.7967	34.9363	22.7367	24.1256	30.933	26.233	25.505	28.097	41.3902	42.331	36.73	39.6445	30.2371	38.8526	38.4201	37.2247	38.6624	4.78378	4.99271	3.85909
ENSMUSG00000002733	Plekha3	22.0162	23.4727	23.598	24.3302	22.5528	24.0149	23.9055	23.9612	25.4251	21.9806	20.3126	22.6011	21.0006	20.5982	21.7324	21.2356	21.1091	20.0277	20.5743	18.5045	18.7531	16.9828	16.6714	17.4773	18.0792	18.6246	18.2033	23.6243	19.8477	23.6011	27.5446	26.7743	28.8327	27.6015	26.8334	26.2589	17.0336	16.4547	15.2128	18.9674	17.5366	17.5225	21.2202	18.4206	21.0507	20.0869	19.7481	17.584
ENSMUSG00000002741	Ykt6	111.314	113.554	119.321	106.258	107.072	107.853	119.506	112.53	108.644	115.102	106.219	121.793	115.749	111.671	117.391	112.418	105.033	104.636	106.674	99.5568	93.3361	102.57	100.772	95.2617	101.437	101.653	92.0861	117.458	121.672	123.912	113.514	118.821	122.838	121.928	117.469	117.479	131.628	139.982	119.695	133.943	122.726	131.72	129.391	110.931	124.251	120.424	109.04	104.666
ENSMUSG00000002748	Baz1b	110.76	113.589	103.84	100.916	107.012	99.3875	106.952	110.675	110.237	93.8228	99.9525	95.5303	93.7667	93.3789	95.6026	100.902	104.981	97.4746	75.4189	77.2827	81.2289	76.5288	81.7058	79.5374	83.5701	81.9104	85.5222	124.771	83.2238	119.752	156.675	137.937	136.317	135.178	148.996	132.234	129.411	124.395	110.121	124.387	149.552	127.608	137.345	118.8	132.078	104.081	106.138	96.2338
ENSMUSG00000002763	Pex6	31.2027	24.3168	25.1298	28.6244	29.4975	28.4349	37.2708	30.5535	24.6618	35.0114	34.137	39.6934	38.7296	39.1375	38.0167	39.8651	41.3596	39.3485	29.4818	34.6858	35.4556	31.5766	31.5053	34.1031	35.3779	33.5056	36.3408	21.2199	20.588	19.1688	27.5151	21.3469	19.8359	23.0837	24.6497	22.0056	33.061	34.7899	29.5472	34.3698	32.2086	35.4875	36.0499	32.2288	35.0383	39.2846	39.7731	37.9309
ENSMUSG00000002767	Mrpl2	79.8224	69.6046	69.339	72.1535	64.3432	69.267	79.2746	69.3245	64.6004	59.1394	54.0307	62.7958	62.4299	65.5101	63.6442	64.294	67.309	63.9895	54.9713	57.4592	50.7838	55.7851	53.1188	56.219	59.477	56.5499	64.4696	73.6891	88.8223	77.2371	87.479	77.7826	76.4354	75.7124	78.7492	74.0892	65.5284	77.1503	68.8678	74.3145	66.4846	72.4528	76.1545	66.8048	76.1278	73.8584	68.5224	71.9835
ENSMUSG00000002768	Mea1	169.676	157.261	169.544	164.775	165.378	160.911	163.424	153.956	150.497	134.481	120.95	142.919	135.835	134.238	140.641	134.354	134.515	120.037	142.789	142.672	137.101	126.626	132.036	134.359	132.611	136.361	136.177	138.332	180.47	128.132	132.307	119.759	123.469	140.642	122.445	120.996	135.365	159.215	136.208	154.794	137.176	161.573	139.431	132.472	143.942	149.761	148.643	140.116
ENSMUSG00000002769	Gnmt	1.70359	2.36284	1.52153	1.43905	1.53578	1.15482	2.14806	1.74657	1.49285	0.836302	0.798431	1.05634	0.552716	0.781806	0.692096	0.691255	0.683084	0.767377	0.915193	0.467705	0.790165	0.699243	0.65554	0.806159	0.602407	0.857782	0.684502	0.268812	0	0.117092	0	0.264838	0.148974	0.234566	0.0627018	0.136742	0.164108	0.235431	0.206062	0.177621	0.160688	0.0586733	0.1753	0.281922	0.106404	1.62082	1.09493	1.43191
ENSMUSG00000002771	Grin2d	0.190653	0.175337	0.187478	0.145734	0.109418	0.149767	0.190278	0.299755	0.183647	0.147625	0.178825	0.242809	0.119117	0.141846	0.154553	0.230886	0.215972	0.137175	0.361572	0.312658	0.394544	0.282764	0.182279	0.335522	0.295756	0.202174	0.301994	0.147514	0.167432	0.12976	0.304763	0.140936	0.138259	0.125494	0.162312	0.082969	0.566591	0.500816	0.414913	0.434041	0.319089	0.343673	0.43376	0.286593	0.213464	0.294861	0.35796	0.233553
ENSMUSG00000002778	Kdelr1	121.656	131.501	130.416	119.729	110.927	121.961	113.121	109.081	105.705	157.323	145.348	165.291	163.447	157.17	156.003	154.626	157.079	138.924	141.931	157.876	162.642	131.952	139.059	153.638	135.166	150.49	155.533	111.402	118.212	109.696	94.3595	105.331	103.913	110.375	109.333	108.068	170.98	177.59	150.292	163.935	149.961	159.313	165.752	143.804	146.868	173.418	168.63	162.493
ENSMUSG00000002781	Tmem143	17.7435	14.7233	14.1699	15.8061	14.3525	13.6833	14.7329	14.6628	11.4271	8.91784	7.91044	9.93464	9.14993	11.3137	10.8169	10.6246	10.3526	9.32473	9.09054	11.62	9.43492	10.1592	11.5397	11.2098	9.41738	12.276	13.7701	14.8519	10.9375	11.2614	13.5704	13.1966	10.8292	15.9758	12.8192	13.307	13.4854	14.5441	11.667	13.3049	11.6915	13.4438	11.2472	12.2784	12.2048	10.7759	10.5386	9.84424
ENSMUSG00000002791	Pdxk-ps	0.0256956	0.0639326	0.0988208	0.0305688	0.0343757	0.0207652	0.0447693	0.104264	0.0222953	0.0654575	0.0363014	0.0354936	0.0299727	0.011927	0.0706631	0.0212042	0.0364766	0.0389591	0.0624388	0.0414925	0.0386148	0.0420956	0.0102574	0.0109812	0	0.0521191	0.0363625	0	0	0.02427	0.0628472	0.0207343	0	0.146671	0.0362051	0.0106199	0.0347787	0.046267	0.0361215	0.0232677	0.0546282	0.0501965	0.033467	0.0376953	0.0422528	0.106511	0.0394235	0.0301876
ENSMUSG00000002797	Ggct	4.0753	4.31531	3.81869	3.33261	4.32609	3.74275	4.30456	3.50034	5.11519	3.85983	3.65641	3.6037	4.93633	4.53806	5.03534	4.98376	4.45897	5.58547	4.36675	4.90038	4.4777	5.42994	5.57439	5.70085	6.68619	4.85702	4.38964	6.63082	14.8015	8.87934	7.59302	6.62628	6.46172	7.01216	5.82713	4.42807	5.17146	4.52285	5.09407	5.40303	3.89098	4.27162	4.80597	4.48525	3.84831	5.49332	5.00739	4.71622
ENSMUSG00000002799	Jag2	42.419	35.3357	38.2838	72.7931	72.3054	78.1597	81.7621	73.2335	57.9951	89.3452	92.984	106.182	91.0135	97.2826	90.3657	85.2669	97.2326	89.871	70.6438	78.7466	76.1536	68.5143	68.2601	77.833	73.0353	68.2063	81.398	1.24659	0.959742	1.43452	0.922319	1.28495	1.01577	0.878262	0.862197	0.888126	2.04533	1.75918	1.66836	1.87298	1.56592	1.30698	1.69287	1.61509	1.34576	43.2386	44.4664	43.7065
ENSMUSG00000002803	Btbd6	23.0361	19.2601	20.5536	19.2702	18.1777	18.8824	22.8448	20.239	19.2513	17.0882	18.7711	19.7084	18.1655	20.6714	19.854	17.6125	18.625	18.2697	14.766	15.8048	13.5928	14.4941	14.9452	13.7489	16.0778	15.4779	15.9528	14.4414	16.484	15.082	18.8595	15.1784	12.8902	15.0712	15.8915	15.578	17.0021	17.8114	15.5716	17.571	17.7148	18.4045	14.8366	14.384	16.354	21.0963	21.2702	20.29
ENSMUSG00000002804	Nudt14	80.2165	61.2561	67.3724	80.7364	78.1703	78.3977	101.608	86.8492	77.1602	83.3948	68.5187	87.0386	99.5628	97.2361	102.604	99.0963	92.8852	95.392	78.3204	81.4061	84.9011	84.8552	85.4584	88.1531	88.7385	85.9858	87.1527	24.7062	29.2286	22.7498	23.3697	20.6836	18.6894	25.5773	26.179	26.6336	29.9809	36.58	33.0485	35.8628	28.1659	33.9737	39.8943	37.4719	40.8395	83.6599	83.3708	84.374
ENSMUSG00000002808	Epdr1	8.43667	7.52912	8.93005	5.54483	5.17582	5.2711	3.58311	3.48062	3.94407	6.26424	6.09497	6.3767	6.66752	6.40478	6.85514	5.69366	5.63074	6.03095	6.2937	6.48667	6.42469	6.3749	5.37892	6.13492	5.52001	6.34486	5.75598	7.35619	6.56122	8.80045	5.95966	7.45785	7.31958	6.25222	5.48612	6.1301	8.90052	8.48961	7.18416	9.41712	8.37317	9.09128	7.10733	5.84746	6.46033	17.0038	15.9372	14.6295
ENSMUSG00000002812	Flii	32.741	32.8268	29.0326	30.3128	28.372	29.8671	32.8285	31.1714	25.6446	27.7741	27.5613	27.5762	25.7561	25.3442	25.7144	27.7777	29.4468	26.4001	21.1334	30.2883	27.1662	22.6427	23.1713	27.3053	25.0095	25.5572	35.8351	33.562	28.9351	28.4499	30.0811	29.538	27.4812	32.6324	31.2491	26.6442	33.6488	33.5559	31.7593	35.2658	35.8706	33.8518	33.0856	30.5719	32.5299	32.9578	31.5634	30.9064
ENSMUSG00000002814	Top3a	16.0841	16.7557	15.9104	15.0503	17.6813	16.8433	17.3094	15.9722	14.5994	12.6132	13.2807	14.1103	14.1346	14.8391	14.7183	14.7474	14.5398	13.2588	10.2165	8.84492	10.7592	9.53201	10.7908	10.8433	11.7612	10.9014	11.3847	16.9563	13.1142	18.0638	17.6768	16.0993	18.0034	17.1081	20.5514	17.0945	17.2745	17.4699	17.6039	18.8333	18.2193	18.3801	16.9276	15.5777	16.8109	15.6515	14.8206	15.1913
ENSMUSG00000002820	Atg4d	20.0968	16.4669	18.5502	17.5834	19.0052	18.2899	22.2081	17.9412	16.8757	19.8071	18.4899	22.3929	20.3488	20.0707	21.3411	22.3079	21.4864	20.2341	13.9509	17.1621	14.8012	16.2759	17.2963	16.5659	17.8167	19.2974	18.2124	12.0039	14.6105	12.1247	14.1788	12.3438	11.7782	10.981	11.3396	11.5756	12.9989	15.2049	12.8388	14.4528	12.5824	15.4888	12.9413	12.4834	13.1205	23.2613	23.4753	21.4712
ENSMUSG00000002825	Qtrt1	35.178	34.1876	33.788	34.8094	37.0729	36.6026	48.0153	43.3699	33.9874	25.1635	23.623	27.4199	30.9095	30.1645	28.2627	32.5436	31.271	28.6118	21.8695	24.9268	23.5243	26.4745	24.1713	24.5107	28.662	28.3075	26.8906	35.8281	36.4375	31.3964	37.4211	35.4216	34.541	37.5902	35.8222	34.5237	21.5465	25.9339	22.75	25.2642	23.4079	26.1167	27.5816	28.6967	28.075	30.2101	30.2935	29.6629
ENSMUSG00000002831	Plin4	0.0498793	0.0701788	0.0844508	0.0666731	0.0944632	0.0765804	0.0751467	0.0812607	0.0432402	0.0210622	0.0280662	0.0411566	0.0373916	0.0322408	0.0227398	0.053332	0.0406738	0.0191367	0.0202733	0.0121025	0.0337838	0.0163908	0.00798589	0.00853624	0.0261181	0.0202861	0.0279793	0	0	0	0	0	0	0	0	0	0	0	0	0	0	0	0.00415494	0	0	0.082495	0.0916173	0.0926092
ENSMUSG00000002833	Hdgfrp2	93.8266	89.4168	82.5749	88.0689	96.3178	94.4954	94.8654	87.5478	78.978	72.7102	72.6894	81.7043	74.0995	79.0616	84.3454	70.3074	73	74.9979	68.7913	75.6688	77.7045	68.9904	78.8464	81.4831	77.1572	71.908	83.0086	94.1338	104.454	84.5207	111.054	91.5143	84.0495	91.0478	100.573	84.6664	85.8719	91.7823	75.8094	82.4905	83.2593	84.4047	83.94	73.911	84.7279	72.1867	73.8056	73.3733
ENSMUSG00000002835	Chaf1a	89.2181	86.0455	83.4994	73.8843	77.9059	72.8344	88.6911	82.6585	73.8143	64.6595	66.3537	68.0357	71.2351	70.4526	70.352	72.6777	71.783	66.2397	53.8326	54.1396	54.8956	59.7683	61.4634	57.0927	60.2946	60.0229	57.3137	91.7431	83.0863	86.825	96.0393	87.719	85.9461	95.0335	98.9693	90.1344	82.0729	85.5525	74.2393	85.7901	92.324	90.7421	86.6636	76.9466	87.1792	75.932	73.9711	69.914
ENSMUSG00000002844	Adprh	117.656	114.799	117.76	98.7408	94.456	100.273	100.865	93.4305	85.2503	124.539	113.121	126.562	127.539	125.771	129.818	119.095	117.451	117.336	108.987	112.753	123.068	110.152	108.188	116.352	107.654	112.262	115.354	187.771	193.789	182.379	174.043	170.023	165.345	160.062	148.952	150.171	198.751	222.166	206.856	212.913	193.918	222.468	175.844	171.062	180.749	129.765	133.256	133.373
ENSMUSG00000002845	Tmem39a	75.46	71.636	76.3526	87.9612	89.7432	90.5646	92.684	90.7562	90.5243	67.7907	60.8033	71.5954	77.666	78.1087	74.4946	72.2982	76.8875	72.9915	78.4356	75.0287	79.1217	70.1425	68.2969	71.4142	72.9008	69.9093	75.018	79.7272	90.7798	71.0724	77.2657	75.0553	76.6893	86.4652	76.7354	81.5696	82.982	78.7328	63.5866	80.8252	70.4434	70.9026	88.3171	71.3597	82.3821	64.8024	64.1591	59.7107
ENSMUSG00000002846	Timmdc1	29.3486	28.7522	29.0922	28.4429	27.51	27.3684	28.1542	28.7386	27.6921	25.0948	24.2569	25.4665	26.2834	25.7226	26.1143	25.5066	27.4935	24.9136	23.1747	24.0749	21.8731	21.3273	21.5906	24.0405	21.2064	22.4334	23.6752	27.0849	34.9729	30.1914	26.6917	25.6198	25.9226	24.0688	22.9469	24.3399	22.7944	26.7727	23.7185	24.3795	22.8151	24.3664	22.879	21.1954	21.9277	26.4645	26.6785	27.5108
ENSMUSG00000002847	Pla1a	0.0464829	0.0257187	0	0.0121539	0.0801416	0.037566	0.0720432	0.0267279	0	0.0658996	0.0146141	0.0142896	0.058343	0.0288195	0.0426858	0.0256005	0.0424167	0.0448755	0	0.0250051	0.0465443	0.0507168	0.0370773	0.0661908	0.0134596	0	0.0288849	0	0	0.0146463	0	0	0.0562452	0.0885521	0.0584506	0.0128187	0.0403282	0.0279307	0.0280021	0.0561911	0.0791149	0	0.077692	0.0726318	0.0764208	0.0128559	0.0356864	0.0479795
ENSMUSG00000002870	Mcm2	188.732	180.11	171.272	144.418	146.955	139.48	166.383	142.401	125.173	115.349	107.177	118.128	125.696	126.303	128.165	123.316	124.832	116.683	98.728	108.539	111.821	110.265	119.559	125.641	99.6678	112.069	117.37	180.676	152.684	170.067	198.255	174.655	166.279	177.539	181.152	163.985	145.131	156.497	146.313	154.803	147.39	155.02	156.392	149.604	154.298	142.248	141.518	140.851
ENSMUSG00000002871	Tpra1	24.4446	24.7531	24.4277	30.5939	26.2106	28.9372	30.5163	25.4406	22.1337	27.7251	23.0868	27.0231	28.5545	28.5273	26.656	27.9271	26.5098	27.4337	31.5947	33.0731	36.1574	28.5251	30.9545	32.5551	32.8489	28.802	33.3157	16.9316	16.2069	19.1358	17.3153	16.513	15.7571	20.71	16.9998	19.7487	28.4991	31.7727	24.218	29.6798	27.446	26.5539	30.6199	28.0906	26.7285	28.8687	29.6618	30.6986
ENSMUSG00000002881	Nab1	15.1146	14.498	15.0523	9.20095	10.6703	11.3433	10.2656	9.55751	10.6672	16.1149	15.9391	15.6152	12.4152	12.7474	11.5456	13.4451	13.0248	11.9776	21.4348	18.9048	19.5088	20.027	20.2759	18.1346	16.8141	19.3956	15.6929	7.7613	11.2801	7.14524	7.03713	9.02379	12.0403	8.08943	8.96962	8.30519	7.61338	7.64854	7.14564	10.0481	8.17517	8.28686	6.92897	7.1861	6.56463	15.8891	15.6797	14.9695
ENSMUSG00000002885	Cd97	0.502598	0.347081	0.753928	0.162079	0.138005	0.217675	0.299863	0.510811	0.302524	0.434911	0.429393	0.230626	0.143924	0.176483	0.205686	0.205009	1.02643	1.15216	0.705634	1.1446	1.1265	0.551693	0.529402	0.499901	1.38409	1.03038	0.514099	20.5018	10.7715	17.0942	9.48967	6.45619	7.07577	6.50776	6.24205	6.59091	35.4879	37.0543	32.1066	18.3628	19.5364	16.4059	18.6245	17.1002	16.6968	1.59834	1.65793	0.872202
ENSMUSG00000002897	Il17ra	3.49466	3.26612	2.99574	2.07028	2.57744	2.47998	2.8043	2.35476	2.15634	3.76727	3.3381	3.91637	3.13181	3.57312	3.03578	3.56058	3.5322	3.25793	3.24093	3.57952	3.79776	3.09848	3.44416	3.47493	3.53106	3.56172	3.52684	1.47414	0.808819	1.19149	1.10675	1.60954	1.23637	1.10241	1.28759	1.23222	1.73063	1.5875	1.34182	1.89227	1.65141	1.54425	2.01392	1.542	1.69088	3.84154	4.01473	3.80014
ENSMUSG00000002900	Lamb1	59.2002	58.981	51.4223	101.747	108.589	94.2704	113.037	106.284	97.6765	131.078	137.909	139.213	122.476	118.763	115.517	119.668	126.348	122.834	113.133	133.267	152.939	99.1202	110.678	121.678	105.399	99.7873	120.198	25.9665	22.4161	24.4203	27.1265	26.8256	24.5901	26.0137	29.9572	25.7276	41.5107	36.1687	31.8873	35.2312	38.0681	30.5342	50.8663	38.4072	41.2014	56.2124	60.6015	57.9765
ENSMUSG00000002908	Kcnn1	4.47031	3.96423	3.94937	3.06625	2.93194	3.18169	1.30212	1.09998	0.948688	2.91034	2.91987	3.23786	2.69537	3.32188	2.90545	2.04453	1.77671	1.93583	2.11032	2.0483	2.1551	2.24538	2.45877	2.44463	2.28451	2.51014	2.37417	0.889369	0.815523	1.2082	1.48016	0.772187	1.09673	1.19505	0.965471	0.843346	2.07035	2.22359	1.8422	2.57443	2.16977	2.32353	2.19018	2.47388	2.14331	4.52138	4.21184	4.80699
ENSMUSG00000002910	Arrdc2	3.33475	3.29104	2.89303	3.41877	3.82051	3.24849	3.06276	3.35078	2.74769	3.52308	3.34786	3.59475	3.75309	4.00789	3.88642	4.03191	4.03853	4.24835	4.05147	4.08031	4.22464	3.73725	4.08634	4.23116	5.51918	4.87622	5.0156	3.55934	2.98999	2.91784	3.24032	3.01421	2.91482	2.98804	2.98709	2.98093	3.82981	4.32874	3.88597	3.69863	3.66028	3.69801	3.37828	3.42521	3.45375	4.07195	3.93649	4.02188
ENSMUSG00000002930	Ppp1r17	3.29022	3.65199	3.77619	0.16043	0.256584	0.135926	0.0873321	0.211315	0.0487001	0.544448	0.567446	0.84503	0.0699915	0.119719	0.0509965	0	0.0171136	0.0175819	0.075777	0.106183	0.0561389	0.0306036	0	0	0.0163279	0	0	0.5201	0.740073	0.665919	1.08674	5.02615	0.363969	0.193477	0.0347215	0	0.187937	0.14591	0.196626	0.72334	0.0154157	0.0325426	0.169772	0.128527	0.150897	4.6585	5.12898	5.02415
ENSMUSG00000002944	Cd36	4.21105	4.17753	4.77761	1.47198	1.83438	1.30477	0.641108	0.734573	0.73392	2.40676	2.52486	2.35004	1.20985	1.01507	1.0283	1.10958	0.930729	1.10641	1.74751	1.34431	1.4758	2.2976	2.15393	2.02855	1.4069	1.87126	1.80534	0.0947817	0.192277	0.187335	0.126792	0.353929	0.311743	0.0655799	0.114865	0.0926528	0.371632	0.294816	0.350298	0.292421	0.205354	0.163523	0.193226	0.233997	0.231867	6.6517	6.11148	6.07811
ENSMUSG00000002948	Map2k7	55.5513	58.0801	55.9653	57.8236	55.2826	70.6991	61.1623	55.7699	49.3361	47.8224	47.3764	50.2294	48.1864	48.4253	47.2358	49.3163	51.5477	44.3856	52.6784	55.1787	53.1971	49.6914	50.4631	59.931	50.0093	49.6363	58.8425	47.5343	37.156	38.4452	39.3952	41.3556	43.2196	45.6981	41.9083	38.2113	40.313	39.76	33.6333	44.7877	41.9042	38.7452	39.2088	33.9694	39.0402	47.2773	45.4006	42.8021
ENSMUSG00000002949	Timm44	80.5343	70.9291	75.5725	72.4924	75.5901	69.9196	77.3766	78.396	77.8503	59.4568	59.0605	63.5138	62.8349	63.7667	69.0997	65.9673	65.7907	67.6189	64.7197	65.4219	68.7808	66.9835	68.7721	68.2324	72.2402	67.7133	73.2087	77.6072	89.944	72.5646	86.6576	76.9141	77.8752	80.3928	80.7007	79.063	62.3797	68.2569	60.1225	65.0019	64.4094	67.316	64.6333	65.8026	70.9346	66.6617	63.5333	67.0979
ENSMUSG00000002957	Ap2a2	46.521	48.1757	45.8631	47.9241	49.0363	47.848	54.6747	49.7586	45.5839	54.0558	54.725	57.4852	54.9752	57.5283	54.5898	55.5956	56.3963	53.2583	40.8246	42.3392	42.8303	42.1071	42.1428	41.6887	41.8371	43.0761	43.0006	54.2339	41.0473	51.0633	44.0958	43.863	40.8696	43.5705	41.753	39.7494	60.9791	60.5855	53.7991	58.6005	62.7075	56.8968	57.5379	50.6217	54.2558	53.5224	53.1799	50.7616
ENSMUSG00000002963	Pnkp	24.0456	20.567	22.0374	17.7445	23.23	20.3909	27.264	20.06	19.4887	17.3817	17.3871	20.5463	20.2896	21.9141	19.2414	19.1641	19.3808	18.1688	16.8417	18.0448	18.0092	16.8006	17.1032	17.3503	18.5216	17.7441	18.6299	21.4851	23.6908	22.3046	23.8064	23.2908	21.9775	22.0393	27.1194	20.9501	22.8364	23.7118	21.8319	22.9109	18.6537	22.4499	21.3179	21.3114	22.6605	21.2257	21.1984	19.7221
ENSMUSG00000002968	Med25	72.2145	69.875	67.5022	58.9211	55.8559	66.1305	73.4762	61.6149	43.8758	47.7563	44.5418	53.8586	50.7939	56.4528	46.4446	48.164	49.2597	47.1896	44.8732	51.2785	44.7945	49.0235	46.9026	50.204	45.8881	48.2919	51.2892	63.976	37.3635	56.7124	54.551	52.7354	49.8319	60.1313	53.3495	51.8015	55.3073	60.8841	57.6327	61.2645	54.7982	55.7286	58.8485	58.1172	56.6106	64.1476	65.3772	65.9411
ENSMUSG00000002980	Bcam	232.512	195.015	213.071	371.138	366.971	381.478	498.884	428.766	354.051	439.376	434.86	491.867	387.489	397.257	385.912	412.946	417.058	405.822	432.461	479.614	541.539	439.677	472.757	507.835	409.071	415.932	486.699	5.12274	6.6489	5.06957	1.14811	3.65125	1.58778	5.42419	5.21134	5.44741	3.47166	3.59922	3.2236	2.8844	2.15639	3.34074	4.20694	3.00774	3.8803	186.43	185.869	195.695
ENSMUSG00000002981	Clptm1	40.1327	40.3321	38.534	35.0592	33.2845	36.5286	39.1021	35.0372	30.9786	40.7622	36.9253	41.2035	38.0652	37.0773	37.8774	35.3717	38.7499	34.6826	34.931	37.4968	37.4704	31.402	31.992	35.6375	29.5675	32.8799	34.6375	37.0437	31.4643	36.9774	29.163	34.2649	32.4222	34.8603	35.3254	32.5877	40.4517	43.0683	37.2462	40.2267	36.7628	37.8139	38.6436	37.6335	35.1627	40.8972	40.7533	39.7673
ENSMUSG00000002983	Relb	1.23801	0.968159	0.945421	1.97171	2.08162	2.0212	1.26214	0.788544	1.09708	3.53774	3.28298	3.16495	6.61558	5.62684	5.13788	2.74607	2.9467	2.52276	7.12967	7.68331	7.56198	5.20157	5.34543	5.70976	5.25718	5.08573	6.06517	1.78108	1.64297	1.70185	3.00915	1.65897	1.30879	2.32876	1.81499	2.10925	3.12176	2.89724	2.5806	3.7473	2.88234	3.58797	3.45607	3.31695	3.19429	1.20627	1.35068	1.07482
ENSMUSG00000002984	Tomm40	120.426	103.94	103.542	89.2025	87.2	92.1124	117.424	100.231	82.5884	86.5461	89.086	96.5777	91.7538	94.5038	97.068	87.46	99.5019	89.6872	86.4819	98.9935	91.705	92.1704	89.392	103.718	93.0897	85.9181	100.308	115.317	110.737	105.952	125.857	105.553	95.7801	111.658	103.552	99.4117	74.7414	86.0365	85.9107	88.8178	85.036	92.3531	91.6211	86.677	95.4407	103.447	102.388	105.924
ENSMUSG00000002985	Apoe	108.87	96.6136	97.9673	99.6645	104.828	100.867	77.2891	65.1093	53.4643	84.4361	75.9818	88.168	89.4577	101.497	90.8503	49.0833	52.8064	52.2139	108.235	111.848	123.805	71.0288	68.5826	77.3362	53.7908	62.132	67.2141	72.7082	78.8969	65.9675	83.4346	66.6523	67.1186	58.0378	61.9358	55.7402	82.4834	84.8838	72.5126	64.4649	57.9284	61.5185	64.5345	67.4602	59.849	93.4066	91.4031	95.8706
ENSMUSG00000002992	Apoc2	0	0.119213	0	0	0	0	0	0	0.0617968	0	0	0.0673645	0.0939568	0.117358	0	0.0598563	0	0	0	0.056414	0.210272	0.0684365	0.0554009	0	0	0	0	0.267397	0	0	0	0.286858	0	0.169245	0.0905789	0	0.253217	0	0.0651491	0.131753	0.0611518	0.166974	0.120335	0.340641	0.405715	0.11954	0.220979	0.164878
ENSMUSG00000002996	Hbp1	89.0918	104.607	99.729	125.366	115.475	127.996	115.974	104.628	104.717	100.693	98.6157	100.908	98.0303	101.389	98.2466	99.4631	98.8876	101.674	86.9443	68.8735	66.3463	77.9474	74.5894	67.1953	70.4831	80.4212	63.0751	81.9718	47.3809	81.167	58.1542	71.341	80.5052	86.326	70.5533	79.1983	86.2682	83.6664	75.8997	87.5128	75.4536	74.7163	78.7568	75.2844	71.166	92.0635	87.1417	82.5098
ENSMUSG00000002997	Prkar2b	22.9708	25.0232	23.9154	22.9973	23.9128	23.1766	23.5513	23.6304	26.6299	30.8448	29.9133	29.8951	31.9321	31.0745	31.5901	31.9258	33.209	31.8653	28.3519	26.5405	27.1224	33.7051	31.9416	33.4896	24.4533	25.19	25.3789	70.6517	73.8742	77.6624	54.1244	56.468	61.1926	51.159	54.0441	50.8231	60.7222	62.2408	58.6626	47.7431	46.0341	47.4434	47.0427	46.452	48.2363	21.5822	21.0291	21.3426
ENSMUSG00000003031	Cdkn1b	37.6125	36.5116	37.5874	34.792	34.7576	35.6708	33.3033	32.5641	36.2128	41.0244	38.5753	41.1381	36.4489	34.2684	35.671	34.7973	37.5881	32.5046	34.8995	39.4747	39.1335	34.2611	33.8735	39.5534	33.092	37.0977	41.901	34.7635	32.1877	34.8973	29.5258	27.7061	26.7343	28.9994	28.4419	28.072	46.9883	49.6081	41.0653	40.6646	36.8536	39.2243	39.1926	33.146	37.766	43.4236	44.0755	39.0438
ENSMUSG00000003032	Klf4	5.58273	4.17916	4.17124	10.6403	7.8271	7.13742	5.19665	4.97714	5.4054	46.5937	52.0737	48.1087	23.3023	30.0142	20.6905	19.5474	22.8802	18.5388	50.3675	45.421	37.8379	24.3268	23.8794	17.05	20.0031	21.5475	16.6921	3.92584	1.50133	2.47541	2.25407	1.70757	1.33062	2.21604	2.0724	2.28757	37.577	34.7936	28.6324	28.1651	21.75	19.5111	33.9855	36.2595	32.4195	4.78804	5.14339	5.87813
ENSMUSG00000003033	Ap1m1	56.5378	57.159	54.4807	46.9328	43.518	51.771	49.4815	47.5613	40.5391	43.4463	44.4876	46.3606	43.7959	44.1707	45.7729	43.862	40.934	41.3429	48.0912	48.0542	51.4162	47.9235	47.7746	48.5652	46.3379	47.6929	48.2423	88.3539	74.6072	86.6496	86.7504	80.7872	85.7901	87.8068	92.5656	83.0236	89.0886	89.9811	83.9326	100.366	95.3742	95.9368	90.3083	81.6872	89.6853	54.2535	56.9178	53.5199
ENSMUSG00000003037	Rab8a	139.048	124.711	119.025	111.502	129.474	129.896	125.629	113.361	139.837	89.2044	89.4065	88.1315	93.1225	87.2214	96.1717	91.328	90.8289	91.9705	119.917	124.798	122.83	123.65	133.624	132.335	115.665	130.189	116.747	124.681	110.814	133.488	143.308	142.419	165.022	130.92	168.168	147.67	92.9102	92.3473	78.2453	87.5495	86.6597	86.6172	83.7911	79.8438	83.2716	91.4638	87.1322	81.3403
ENSMUSG00000003038	Hmgn2	593.561	593.951	586.879	467.885	507.18	458.522	432.062	504.216	603.023	480.481	444.671	447.514	517.588	490.244	594.093	468.172	519.231	513.336	536.331	634.995	552.265	586.975	607.894	696.952	580.383	633.774	665.446	669.96	850.421	724.953	624.285	709.393	823.828	699.953	906.825	784.563	689.697	708.703	622.957	709.596	633.173	724.359	704.104	651.942	682.467	705.079	701.352	668.757
ENSMUSG00000003039	Fam32a	109.088	122.154	126.785	120.967	125.197	124.598	119.295	126.603	117.11	132.487	118.082	132.794	132.473	125.967	128.618	131.547	123.33	115.048	119.058	109.503	101.717	118.369	113.991	108.007	108.494	119.721	102.249	88.6889	89.2391	95.1151	85.8526	91.5036	99.7428	94.7472	92.0536	94.3599	86.5779	90.5733	82.1788	90.39	80.3756	90.9608	87.2336	79.9814	89.261	138.032	129.661	127.02
ENSMUSG00000003051	Elf3	14.1097	12.7017	12.411	12.9463	12.0472	11.0266	10.6713	9.41461	8.46267	10.8627	9.05402	11.1739	9.75164	10.6536	10.687	9.73148	10.7104	9.70213	7.69982	8.65757	9.25175	6.5926	6.96968	6.71072	7.59697	8.13527	8.72356	3.45742	3.56604	3.66434	3.54016	3.57022	4.34594	3.38616	2.64637	3.1847	3.16171	3.71707	3.74467	2.33096	2.2985	2.78327	1.77192	1.88883	2.60885	20.2612	20.416	19.6845
ENSMUSG00000003053	Cyp2c29	0	0	0	0	0	0	0	0	0	0	0	0	0	0	0	0	0	0	0	0	0	0	0	0	0	0	0	0	0	0	0	0	0	0	0	0	0	0	0	0	0	0	0	0	0	0	0	0.0134617
ENSMUSG00000003062	Stard3nl	25.4879	26.9803	25.0733	30.2583	26.7739	27.4704	29.3	31.8688	36.3638	38.9803	35.87	41.0002	42.145	44.521	41.7768	47.3305	50.8872	49.4855	21.1167	23.1338	22.5523	23.1601	21.0433	21.7034	24.0694	23.3391	23.4358	32.2569	37.7783	32.5746	31.9979	26.3124	28.4811	31.3432	27.8583	28.5178	47.5951	52.3366	45.826	48.992	44.741	48.2685	45.6147	45.5482	44.9739	41.8824	41.5134	39.1148
ENSMUSG00000003068	Stk11	111.477	102.166	108.556	110.89	106.833	117.045	122.527	112.663	97.5335	97.9428	88.639	99.3203	99.3995	96.7652	99.9615	106.144	96.1557	93.0559	117.247	115.216	133.036	117.171	128.756	117.007	123.304	114.529	124.458	101.18	101.917	97.2766	96.6996	84.968	87.31	96.817	93.6624	94.2393	77.8465	83.945	70.0773	82.1719	75.1555	73.516	85.2083	74.2191	80.1633	102.369	99.0233	96.2907
ENSMUSG00000003070	Efna2	49.6844	48.1405	50.5393	40.863	39.3782	47.9354	43.788	41.6162	35.5117	32.4424	32.1321	34.072	37.351	36.984	39.9103	37.9957	43.7682	34.0461	35.1837	41.6724	36.5461	35.9653	38.6713	43.302	37.392	39.6093	44.2185	90.572	70.2203	85.0552	80.1597	81.5585	78.8654	81.3686	81.011	71.6512	77.6361	86.2932	67.3164	73.939	68.668	74.9201	67.7697	61.792	69.8699	43.6648	46.0318	44.1361
ENSMUSG00000003072	Atp5d	477.111	365.807	367.611	333.481	319.989	350.133	430.617	347.561	302.795	335.172	319.944	379.156	373.846	359.101	377.271	349.87	370.921	323.781	370.112	463.986	351.276	445.037	397.619	467.295	445.267	440.574	487.564	334.179	385.76	292.654	356.476	317.718	293.449	362.014	336.119	317.952	292.154	336.094	292.724	349.219	306.161	344.508	352.532	306.982	356.372	378.909	386.825	361.584
ENSMUSG00000003099	Ppp5c	131.033	122.905	126.821	116.155	111.02	127.581	139.681	114.348	104.939	85.5068	76.2715	79.1488	86.8105	83.8245	90.6774	83.43	78.4015	73.6369	109.472	110.656	114.198	109.894	114.957	115.981	98.0924	110.209	114.638	164.358	133.957	168.122	168.245	145.765	160.508	168.805	145.999	140.159	96.6253	103.277	92.9152	107.653	92.0327	96.373	99.0587	92.7072	94.7244	87.8956	86.8805	87.5111
ENSMUSG00000003119	Cdk12	41.7131	45.9822	42.4518	45.7444	49.2312	47.3199	45.3548	51.1071	49.0299	38.7424	41.2079	37.1622	40.6708	39.5544	41.299	46.3234	43.8084	40.9517	38.4234	37.8131	34.3264	36.3971	37.828	37.2968	40.824	42.9169	42.4868	43.8119	23.0305	42.6606	38.4763	44.2647	42.3286	41.5152	43.8769	39.3904	41.4778	35.4525	32.208	34.4281	37.4855	32.16	35.4857	29.9401	33.8435	39.1086	37.3594	34.5131
ENSMUSG00000003123	Lipe	9.2485	9.85363	8.4819	10.0014	10.2862	11.3433	14.917	14.1406	9.8848	5.42903	4.99065	5.93723	6.05093	6.43232	6.79295	5.48162	6.46266	5.54654	3.94985	3.98189	4.16116	4.0762	4.20659	3.50405	5.43327	5.45166	5.38639	6.70931	5.25927	5.9639	7.67339	7.16968	7.41797	6.54136	6.65598	5.6348	8.83129	8.87457	8.31356	9.35165	8.55748	9.71129	9.43291	8.70141	8.46217	7.74591	8.46052	8.10539
ENSMUSG00000003131	Pafah1b2	111.867	125.827	126.782	120.589	119.832	119.969	112.009	127.687	133.582	129.763	128.608	126.794	130.761	130.955	130.947	134.727	133.06	132.862	116.77	109.396	109.691	118.309	110.198	110.374	114.961	116.216	113.587	121.573	122.112	127.126	117.451	133.194	136.335	131.387	129.845	134.538	116.067	107.233	108.138	120.57	121.883	117.747	124.365	116.386	118.652	134.323	130.642	128.412
ENSMUSG00000003134	Tbc1d8	4.71456	4.4622	4.45988	8.90275	7.72051	8.11553	9.45162	8.74869	8.09682	10.0811	9.10254	9.25289	9.32398	8.95775	8.85813	12.894	12.9091	11.4909	10.7878	10.6218	10.85	10.6808	10.8298	11.4376	13.429	11.6228	14.8306	1.574	3.63736	2.61807	1.89487	1.83831	1.95134	1.65823	1.70436	1.76088	1.81615	2.00739	2.16265	1.64556	2.21296	1.45064	3.23711	2.95417	2.79544	6.64221	6.47379	6.05859
ENSMUSG00000003135	Cnot11	50.7102	54.1931	54.392	51.3525	52.8675	51.9842	51.9115	52.1777	55.8827	53.249	51.6238	56.3624	53.7366	55.8541	55.9329	54.3425	51.2791	52.6538	45.6026	43.2949	44.2488	44.5594	45.0383	42.4816	44.4849	47.1544	42.094	54.0437	61.6082	58.3934	51.3489	54.8711	58.2454	54.0377	56.983	54.4705	53.04	52.3168	47.2589	50.991	50.8829	52.318	51.3256	46.9207	52.6117	54.9781	52.553	51.2235
ENSMUSG00000003153	Slc2a3	175.538	177.01	197.713	208.316	215.62	202.813	320.884	311.319	315.971	447.515	469.07	525.582	300.973	279.644	264.034	279.121	282.943	313.696	256.438	257.848	291.927	202.522	222.558	236.032	187.859	230.641	226.131	4.99386	4.93956	6.32374	4.91393	9.26373	6.9631	6.76956	7.23437	7.19204	9.91539	8.95294	8.02419	8.64573	8.32171	8.03262	9.88505	7.73726	8.6371	18.3065	19.779	23.4597
ENSMUSG00000003154	Foxj2	4.78631	4.66295	4.82505	5.83297	5.53666	5.78993	6.27933	5.24959	4.85531	7.72241	7.53713	7.89663	7.4507	6.56348	6.78721	7.22677	7.31089	6.64052	8.75052	8.98407	8.96094	8.05879	8.44351	9.17256	8.24009	8.63477	9.35995	5.38039	3.87187	5.62375	4.71905	5.0182	5.27277	5.24005	4.9064	5.11985	11.7268	9.81526	8.24163	9.70824	9.14377	7.69341	9.57911	7.14914	8.26559	5.88099	5.47353	4.82924
ENSMUSG00000003161	Sri	94.1793	83.4402	82.5459	90.9866	95.6262	101.035	105.845	97.6647	93.0253	109.442	100.639	106.543	106.134	94.6109	105.772	116.852	101.154	99.8029	111.35	115.401	116.168	122.863	131.91	121.512	130.827	160.33	132.496	112.982	129.212	125.242	113.822	106.995	117.549	108.589	106.361	111.992	137.275	142.528	111.787	128.778	109.155	128.304	119.783	103.034	117.438	96.4816	85.786	88.4016
ENSMUSG00000003166	Dgcr2	84.3271	81.1618	81.2603	76.5297	75.3205	78.9203	91.188	82.7211	71.9754	99.016	97.3514	100.742	101.104	101.816	93.8853	99.8772	96.1296	94.2171	85.1342	81.5202	82.4404	84.7875	82.2804	80.8926	80.9315	82.2922	79.2134	79.3546	60.3402	76.2284	86.4633	75.8424	71.2115	82.5461	77.3673	73.7924	104.162	109.04	98.0932	107.604	104.305	99.3988	104.334	97.2535	96.3403	97.8327	96.0657	95.1029
ENSMUSG00000003178	Mical3	8.24523	8.99818	8.73852	9.4838	10.5616	9.95695	9.85519	10.3145	9.17769	9.38443	9.56558	8.19385	10.0816	10.3839	9.78473	10.6803	10.1515	9.95471	7.86589	7.14909	7.80022	8.42319	8.91309	7.62801	7.76763	8.45019	7.36232	8.94135	2.32599	9.97603	7.46847	7.8087	7.6923	6.71478	6.96716	6.10752	7.53182	7.39556	7.00318	5.12264	7.07624	5.36833	5.95646	5.83354	5.56738	10.0368	9.28794	7.53842
ENSMUSG00000003184	Irf3	58.3279	47.8449	49.3602	48.1956	49.1334	51.4902	53.3656	47.5287	44.264	53.056	53.0248	57.7883	52.4475	55.7734	55.9703	55.5307	54.2636	51.2004	63.9503	67.2823	68.386	60.7477	67.2044	70.3623	71.6878	70.9501	74.0095	45.6497	57.0624	44.6176	53.7043	40.742	46.9999	49.5176	44.4756	44.4971	53.3208	60.1784	47.8585	61.9215	55.8618	53.5488	54.1514	49.6475	48.6272	55.0928	57.1329	50.784
ENSMUSG00000003190	Bcl2l12	57.9121	54.3218	53.393	52.9452	48.7381	62.1136	67.4618	56.8624	44.1021	42.3868	44.2649	46.0282	45.9756	49.4777	56.2169	50.7364	46.7269	47.1877	39.9714	42.481	45.4571	41.47	41.0153	39.9709	43.8978	42.0685	46.9204	68.6142	61.0884	60.6852	77.0047	62.9869	61.7341	68.6037	63.0876	60.4996	72.3738	77.5732	71.2225	81.4739	72.626	76.4443	71.0079	70.2775	65.9155	46.0678	45.8684	48.4764
ENSMUSG00000003198	Zfp959	6.71506	7.57322	7.30641	6.89263	7.90904	7.29812	6.99132	7.6103	9.33482	7.75375	8.704	8.42233	7.59369	8.88349	8.52801	7.79111	7.62063	8.14181	7.10296	6.23394	5.31756	6.35594	5.58248	5.1612	6.76945	7.35708	5.96175	7.50835	11.2275	10.4901	8.79566	8.90897	10.4424	7.97041	9.41919	9.2995	9.04706	7.97505	7.62363	8.10027	7.74275	8.29808	8.8568	8.0002	8.17206	8.55651	8.16146	7.63454
ENSMUSG00000003199	Mpnd	125.828	120.065	119.322	132.515	143.402	137.308	149.601	122.825	109.155	96.7673	101.54	113.98	117.059	111.074	116.002	114.885	122.315	117.784	86.4824	83.2808	89.0117	112.608	108.144	104.98	93.2534	108.153	93.7575	114.304	101.179	100.19	129.888	119.005	108.427	136.306	138.025	122.987	130.738	149.648	125.878	170.715	159.204	166.56	146.547	141.895	165.407	132.443	132.172	136.08
ENSMUSG00000003200	Sh3gl1	76.4094	69.9171	68.0084	66.511	64.1413	70.3383	86.0183	71.7067	59.7647	74.9045	66.4742	78.6217	71.4005	75.8782	73.5773	70.7869	74.6795	68.4329	65.9364	68.857	69.8606	65.4413	64.1155	70.2199	64.3328	65.8243	71.7862	74.2875	69.687	69.8656	81.913	72.468	70.3361	75.6039	70.0785	70.0686	81.7911	92.0654	82.8423	92.195	81.6566	84.3152	89.8366	84.5244	83.8692	69.1041	69.5525	69.4432
ENSMUSG00000003206	Ebi3	0.942751	0.764097	1.01408	0.48022	0.858119	0.688525	0.585112	0.488208	0.638424	0.614934	0.325916	0.681583	0.574579	0.730597	0.538132	0.466994	0.352113	0.417058	0.616416	0.523377	0.550335	0.335422	0.328823	0.781157	0.255503	0.311951	0.579745	0.555126	0	0.726576	1.0438	0.391753	0.576521	0.638816	0.498735	0.744903	0.618842	0.588741	0.571768	0.441345	0.656024	0.614903	0.948939	0.532109	0.568744	0.936106	0.660901	0.815156
ENSMUSG00000003208	Ccdc94	15.9868	15.7944	14.3287	13.5284	14.2713	13.5759	14.2721	14.6872	13.1008	12.1451	12.6793	13.9867	13.6615	14.5638	13.8683	14.3782	13.9374	12.1729	11.8532	13.4056	11.3431	12.4789	12.4997	13.2025	13.4002	13.2114	13.9145	17.5091	15.5565	19.0233	18.3846	17.8964	15.06	19.8155	19.1644	16.3754	18.2388	20.3445	15.2811	17.0234	17.367	17.6017	17.3051	15.2039	17.1047	16.3777	15.3796	14.5226
ENSMUSG00000003226	Ranbp2	46.3076	50.89	44.7286	48.3566	54.5175	46.5952	47.9538	53.1091	57.6323	51.3449	55.9425	50.3142	50.9818	50.8615	49.8853	50.7141	51.1053	50.0322	40.8726	37.9344	37.3253	39.6426	38.6743	37.1769	40.257	36.6205	35.9565	49.1518	28.9116	51.6748	52.474	54.0043	53.5742	47.3752	56.8505	48.5272	42.9705	37.0697	34.7852	36.3013	42.5063	36.5229	42.0844	36.1574	38.5441	44.1862	46.5228	40.8856
ENSMUSG00000003227	Edar	2.34793	1.89151	2.33244	3.37383	3.36541	3.12522	2.44361	2.23767	2.0152	5.72294	4.83411	4.71875	11.6551	10.2304	9.33775	7.38346	6.22001	6.15069	15.8156	14.9216	14.9799	19.7023	19.7342	17.5856	8.4305	10.6504	9.47124	0.0298843	0	0.0151676	0.0098409	0.0713442	0.0362716	0.0534215	0.104981	0.0663605	0.0625316	0.0505612	0.115963	0.0363233	0.0819455	0.043505	0.0335217	0.127705	0.105811	4.22646	4.05295	3.97596
ENSMUSG00000003228	Grk5	16.4994	17.1132	15.4725	5.3527	5.86718	4.99438	5.86037	6.63557	6.81446	4.5369	4.21445	4.63612	4.37232	4.74578	4.75057	3.48581	3.82287	3.95759	3.06075	3.43812	2.75467	2.75113	2.89955	2.56184	2.65448	2.22301	2.40787	15.6943	12.7016	15.2926	10.9448	11.2803	13.5273	13.1183	15.1288	13.5055	14.596	13.8398	12.054	8.05956	8.9601	8.27657	8.38964	7.49985	7.57417	19.8582	18.5096	17.7884
ENSMUSG00000003233	Dvl3	60.0962	55.4348	54.7957	63.725	65.119	76.559	72.3684	67.6612	54.4044	57.2792	59.6822	61.4091	56.2889	56.5044	55.64	55.6026	59.8165	53.7758	51.4864	58.117	52.8387	50.2296	52.8074	52.7997	43.5534	46.529	51.3216	45.8518	14.5672	42.5108	46.9078	46.6087	42.8928	47.0208	47.0051	43.787	52.3871	49.9799	44.3581	46.6716	52.3972	44.9427	50.8057	42.0863	45.5922	50.6239	49.3529	45.6364
ENSMUSG00000003234	Abcf3	38.5994	41.3446	43.1234	40.4366	36.7774	39.1234	40.8139	41.2205	37.5815	34.5814	32.3205	32.6129	35.8053	36.085	36.3873	36.3987	37.3898	37.7659	43.4816	40.5129	40.4737	41.9282	45.3413	39.1521	45.9907	44.4967	46.2259	40.5322	48.7182	36.1161	48.2839	39.2609	36.3977	39.202	36.6771	38.4742	39.7301	39.5164	35.4027	43.6742	36.6981	41.7286	39.0498	31.8907	41.7193	40.7488	39.6143	36.0766
ENSMUSG00000003235	Eif2b5	84.9773	80.0957	75.0519	67.8268	74.6683	68.4119	82.3088	75.445	75.1342	72.7878	69.6511	79.6221	77.1009	76.9949	79.2457	78.4757	76.865	77.2197	56.7671	58.1232	59.0573	57.6887	57.5947	57.1688	59.3986	60.7265	60.015	79.021	136.823	84.502	94.1978	83.0163	88.129	83.6419	92.5323	81.5428	72.9855	78.9261	69.3976	76.9202	76.7876	79.1297	73.4191	68.1618	75.2338	83.0976	79.9191	78.2495
ENSMUSG00000003269	Cyth2	107.181	86.295	80.2805	70.3793	74.3326	77.2226	77.762	71.2718	70.474	73.6481	78.8781	88.2382	72.5367	74.5189	81.2505	69.9335	76.038	77.9718	66.3428	72.8453	70.3627	61.3832	62.5577	66.6993	59.302	62.0748	70.0678	78.6465	92.173	76.5463	114.893	86.3388	83.1708	84.1244	85.9629	81.4413	84.059	90.4882	82.8976	98.5281	93.1009	96.7562	87.4053	84.7605	89.3632	89.7592	93.5737	89.9174
ENSMUSG00000003271	Sult2b1	7.60258	7.77579	8.48582	8.28751	10.8977	9.24361	7.41906	9.16699	6.81903	11.2582	10.117	13.3002	7.5257	8.41464	9.77849	5.45934	5.1707	6.88087	7.99834	8.51334	8.44951	5.67445	6.71339	5.70925	4.54089	3.94044	4.61911	0.308416	1.76186	0.795599	0	0.441652	0.554746	0.309796	0.0788268	0.22724	0.214758	0.173554	0.432519	0.149671	0.273923	0.185327	0.188387	0.318378	0.137172	5.92198	5.49925	5.09187
ENSMUSG00000003273	Car11	6.63767	6.37264	6.10452	1.99816	2.99785	1.96622	1.11835	1.44379	0.659652	1.69239	1.39694	1.80748	1.86386	1.6227	1.38909	1.50854	2.04766	1.54209	2.59579	3.15828	2.75906	2.21092	2.57042	2.79713	1.98282	2.37387	2.68389	2.27356	2.24791	1.63976	2.12826	1.98058	1.46997	2.34504	1.74421	1.80984	3.41827	3.1155	2.31459	3.68112	2.56178	2.17417	5.78697	4.55958	4.55755	4.93124	4.94575	5.12029
ENSMUSG00000003279	Dlgap1	0.319394	0.266107	0.256221	0.220182	0.205441	0.270094	0.141213	0.0817478	0.113772	0.167384	0.207491	0.183018	0.186573	0.144815	0.117579	0.0875572	0.104695	0.142682	0.216725	0.166177	0.122489	0.187177	0.203285	0.169374	0.101793	0.0551047	0.105014	0.283407	0.275321	0.300694	0.183648	0.23117	0.170677	0.373464	0.178557	0.200744	1.10006	0.833101	0.767791	0.398521	0.265914	0.305392	0.606523	0.451439	0.52144	0.58276	0.449261	0.396116
ENSMUSG00000003282	Plag1	7.65218	7.31551	6.94269	9.02711	8.64984	8.88542	9.07923	8.06721	10.4973	10.2107	11.0111	10.3734	9.98908	10.8204	9.77201	10.2357	10.9418	10.8215	9.50913	8.67213	8.2112	7.79694	7.8904	7.56556	7.94875	7.19947	7.48149	7.87524	2.44882	8.21545	9.47256	8.1252	8.08136	7.79212	8.08981	8.151	10.1017	9.36174	8.3113	9.55979	10.6791	9.51191	9.99297	9.9115	10.3291	9.13123	8.09174	7.85591
ENSMUSG00000003283	Hck	0.237228	0.123493	0.2176	0.261902	0.235332	0.431111	0.498127	0.397005	0.291202	0.139292	0.168032	0.112316	0.182416	0.111357	0.207498	0.139503	0.167124	0.214679	0.235217	0.210473	0.274909	0.499907	0.661382	0.707699	0.0800175	0.112557	0.1438	1.21739	1.18287	0.681982	1.82885	1.11175	1.2523	0.673406	0.620139	0.60875	1.08424	1.01707	0.937266	1.40633	0.955075	0.809333	1.15744	0.877285	1.10841	0.533501	0.455584	0.49011
ENSMUSG00000003299	Mrpl4	64.0639	63.5996	61.1267	52.5859	53.0245	57.0887	74.5566	62.9744	50.6146	47.4261	44.2645	53.4235	48.8008	46.5967	50.7564	47.5454	48.7697	45.4729	42.1075	46.8516	44.6743	42.262	41.9742	46.0009	42.1193	44.9263	46.7275	73.82	76.7703	71.7447	80.4658	73.3289	72.7179	86.91	72.7879	69.0937	61.4444	70.2712	59.8558	76.3553	68.2364	74.4527	72.0328	63.5247	66.6639	50.8317	51.9833	51.7032
ENSMUSG00000003308	Keap1	37.6504	31.1918	33.001	28.3425	28.9944	27.4672	31.1287	30.2423	25.9595	27.7899	26.4569	26.4193	28.3121	28.9391	28.5121	30.5901	32.842	30.234	25.6739	30.9394	27.901	28.2049	30.0884	31.6105	34.1772	34.4738	37.0061	20.0112	20.7174	19.8197	29.9684	25.1663	22.1918	27.1985	27.0689	25.2986	28.2849	29.4412	27.578	30.7197	29.3339	31.2618	34.8605	32.0398	34.7619	38.1511	38.2149	37.8781
ENSMUSG00000003309	Ap1m2	100.497	97.666	98.4068	84.8629	85.5151	85.5792	90.2973	78.9271	71.875	97.6155	94.3376	101.991	97.8384	98.1586	99.317	82.4488	87.2077	84.1113	74.9664	77.3761	77.0536	79.1015	79.0303	81.3619	72.8352	77.1065	77.7553	0.39978	0.445381	0.506908	0	0.418624	0.113825	0.0340432	0.0846375	0	0.139825	0.0806828	0.161318	0.146049	0.0760992	0.0482788	0.0446967	0.0838744	0.176384	114.131	110.214	108.089
ENSMUSG00000003316	Glg1	51.9368	53.7001	47.4569	55.4375	56.2888	52.0261	56.3147	54.7422	50.1083	55.488	60.402	54.3151	53.847	54.7212	50.5212	53.0074	60.032	51.7261	42.5606	50.1528	52.1489	39.0956	44.8073	47.9249	40.4402	42.7505	48.3982	46.0704	23.7721	43.9109	47.8945	45.6187	43.8607	45.0526	46.3953	42.4434	52.0867	49.6706	45.4616	42.6685	59.1854	47.0744	48.5708	45.5432	42.7403	45.0222	50.0238	44.3639
ENSMUSG00000003341	Atp8b3	0.328569	0.315576	0.262949	0.418375	0.333826	0.376994	0.213333	0.287619	0.199421	0.19445	0.160367	0.144721	0.133099	0.151862	0.22793	0.0865346	0.125168	0.0946369	0.0640557	0.0743818	0.0741577	0.0377674	0.0788653	0.0674613	0.0630399	0.0801367	0.0982531	0.329582	0.390749	0.384097	0.55506	0.355094	0.408598	0.267999	0.342427	0.216827	0.209926	0.188771	0.26049	0.10086	0.211985	0.183649	0.180729	0.257669	0.227016	0.271846	0.181138	0.157623
ENSMUSG00000003344	Btbd2	81.8096	76.6633	79.2884	69.7929	67.718	77.2605	82.7091	67.3691	51.5032	61.099	53.4092	60.3838	68.6285	71.9689	70.7238	71.5444	71.8042	65.8907	55.0032	62.9028	65.1297	57.6875	61.4451	63.123	56.5915	65.3912	70.3283	68.2736	57.9738	59.4031	68.4305	51.9196	50.037	63.0241	60.4668	56.8952	80.8223	91.0756	78.8829	88.2038	79.3224	84.5455	84.9774	83.9385	80.6787	90.1113	89.7726	89.0804
ENSMUSG00000003345	Csnk1g2	212.186	191.172	206.007	203.592	204.912	218.999	235.012	203.538	176.259	167.99	148.51	171.389	181.598	179.406	186.34	180.298	185.576	169.254	182.088	197.969	177.685	180.597	192.568	203.477	176.39	183.445	196.843	207.638	196.488	205.979	240.307	205.518	204.566	230.929	215.116	200.879	168.382	194.836	160.561	180.11	159.421	178.147	188.893	172.318	185.806	176.36	171.653	161.74
ENSMUSG00000003346	Abhd17a	78.39	55.7894	57.9206	54.516	46.7673	52.2067	65.0969	49.7641	43.6082	55.4251	58.5319	65.8438	68.3532	71.4646	68.5648	61.9605	77.1038	64.5011	48.8019	60.6896	40.5792	49.0699	44.0976	54.7329	50.5958	50.2374	60.5443	57.2096	75.152	57.381	60.833	54.6248	50.4574	64.0119	48.1188	53.4604	77.5526	94.0267	86.227	91.8212	78.7341	99.8367	88.9093	90.2319	91.5816	82.391	85.5281	87.2029
ENSMUSG00000003348	Mob3a	25.8329	24.3136	26.1519	21.7881	22.791	23.7548	22.7657	20.2879	18.2824	25.0572	23.3756	25.0438	26.174	25.5034	25.5443	25.5435	25.2191	24.3532	23.6079	22.9407	22.6287	22.7252	22.1306	21.4679	22.2957	24.7866	24.3922	31.5094	33.0261	31.9143	29.6133	28.2569	27.3737	28.8439	26.48	27.6118	42.2038	43.1516	40.1185	43.6477	40.3994	42.5368	38.8203	37.2006	38.7094	28.8518	27.7965	27.9352
ENSMUSG00000003352	Cacnb3	82.2784	71.7626	74.1005	122.038	113.942	120.382	122.968	104.102	87.944	97.4676	97.0479	105.101	103.358	108.25	105.904	94.7232	99.2844	93.5472	90.7459	90.8863	89.4756	95.1251	95.4466	95.0394	91.5205	89.1877	96.7466	20.2505	19.9339	18.3266	15.0028	13.4385	12.2337	20.2127	16.8581	19.3282	43.0934	43.3719	35.4059	60.2798	51.9935	51.9763	60.3508	54.5099	54.7494	80.2344	78.2046	73.5636
ENSMUSG00000003354	Ccdc65	0.612932	0.524543	0.537359	0.46535	0.555214	0.564274	0.795481	0.355199	0.488113	0.50985	0.438425	0.345434	0.599146	0.622785	0.649909	0.397038	0.295996	0.272121	0.856908	0.663747	0.678072	0.725539	0.683628	0.746381	0.550917	0.75415	0.674484	0.366799	0.276194	0.357733	0.242603	0.333811	0.286109	0.496525	0.394587	0.374869	0.655947	0.546256	0.468479	0.479047	0.322969	0.340945	0.309278	0.204861	0.398834	1.04	1.09477	1.08246
ENSMUSG00000003355	Fkbp11	9.77454	7.17992	8.03678	6.39799	6.90285	7.09453	8.94604	7.23108	6.98833	5.54721	5.59023	5.75254	8.0494	8.4029	8.53275	6.34578	5.90237	8.1605	8.94243	8.71052	9.23434	9.71937	10.7485	9.58802	10.4223	9.72412	9.25373	13.0915	17.2142	14.412	23.8257	16.5521	18.2423	16.6555	16.2649	16.3178	8.28902	9.17994	9.16615	9.33255	7.88185	9.56431	11.1365	10.0331	10.6473	6.77094	7.69949	5.59905
ENSMUSG00000003360	Ddx23	71.6509	72.1682	69.696	62.8216	64.9564	70.0487	66.4022	67.606	60.7668	72.5978	70.297	71.3716	75.6155	74.4545	74.66	72.6383	71.1315	71.4084	57.7583	55.7379	59.368	57.3231	59.8788	58.8371	59.5442	60.2048	59.8737	85.855	61.344	80.9676	91.077	81.672	76.3394	79.5479	86.7428	74.8996	86.1078	92.8092	85.8863	88.7141	85.3994	85.6699	79.1653	77.1456	80.5436	79.2518	79.3878	77.3308
ENSMUSG00000003363	Pld3	27.2456	26.1816	24.4248	27.4689	25.7918	30.3404	30.5267	23.539	19.0621	36.7814	40.7575	38.1499	34.5788	34.2514	35.1112	32.0785	32.0319	32.1624	45.4751	44.8998	49.6953	35.528	36.352	38.8722	37.5618	36.6441	41.6447	19.1221	14.8663	15.635	14.3505	13.8229	14.147	14.9922	14.4398	13.1269	31.8361	35.1018	28.8071	31.5098	28.9976	30.5716	28.7808	26.6167	24.5024	39.198	37.4024	39.2327
ENSMUSG00000003378	Grik5	31.1372	26.6129	26.9306	21.1579	22.1382	24.4779	22.408	19.6401	17.618	16.5779	18.1023	18.8916	17.5362	20.1444	18.2522	17.6616	19.8419	18.5107	14.7611	16.8468	14.7158	13.8103	12.9718	14.1331	18.022	12.761	17.24	11.6416	10.5475	11.7597	14.9742	12.8916	12.707	14.8705	14.5624	13.6844	23.634	22.4537	21.0376	23.778	23.9933	22.2	26.6681	24.6801	24.4712	32.529	33.3765	34.7022
ENSMUSG00000003379	Cd79a	0.0443328	0.055491	0.102678	0.0533058	0.0586972	0.0552559	0.0533096	0.0198657	0.15842	0.11408	0.0630252	0.168615	0.0683969	0.125453	0.0207853	0.019019	0.0627745	0.0429814	0.0368957	0.0184824	0.136809	0.0931621	0.0913094	0.0391367	0.0993869	0.0559661	0.0643702	0.184307	0.613714	0.125062	0	0.107238	0.182113	0.171898	0.0638843	0.297743	0.0765571	0.277263	0.184595	0.200837	0.207007	0.0794239	0.0565283	0.15694	0.128768	0.055761	0.0170615	0.0832332
ENSMUSG00000003380	Rabac1	33.8324	27.397	29.4566	29.2183	26.5074	27.9681	28.2828	24.7468	19.9881	37.7388	35.4987	40.6441	39.5989	38.7694	36.423	36.2134	42.9144	36.09	30.0005	39.2938	34.2691	33.2157	30.9528	35.8873	37.289	36.655	41.3053	20.1003	20.8906	19.2917	21.9551	19.5055	17.0901	22.5195	18.5905	19.3196	38.9165	48.1365	37.8238	42.7114	35.2956	42.0176	39.3137	38.2411	36.4549	49.8922	50.2976	49.216
ENSMUSG00000003382	Etv3	15.5887	16.0647	15.6688	18.1639	19.5171	19.8281	19.4655	21.0141	19.8983	31.7252	31.0364	33.0984	27.2744	25.7605	26.5714	28.8267	28.328	27.3221	32.7448	30.7893	32.052	25.1969	27.8691	26.201	28.3476	30.7445	28.9203	10.4689	7.56256	10.5816	10.5941	10.6054	9.94598	10.9608	10.3719	9.69656	14.3324	14.0473	11.5271	13.8057	13.8027	12.2401	13.8622	12.2926	12.2711	16.8937	16.7893	15.945
ENSMUSG00000003402	Prkcsh	104.08	101.398	98.2815	97.4522	100.946	99.7659	116.12	98.3249	88.4292	111.217	101.617	112.89	111.044	112.087	111.468	104.853	107.718	100.054	87.5721	103.849	126.026	85.8074	94.1728	110.118	86.8769	95.6211	112.259	80.749	81.1418	75.8314	85.27	69.2187	66.9196	81.1337	78.0137	74.5007	98.3893	96.1678	80.3517	94.2388	82.3805	85.7858	90.5615	75.1923	79.6771	104.223	101.487	94.8525
ENSMUSG00000003410	Elavl3	20.8825	23.3985	24.1406	0.139814	0.138294	0.171512	0.0664999	0.0344483	0.044764	0.281155	0.360616	0.352546	0.0516248	0.100703	0.0837371	0.01416	0.0468054	0.033031	0.102563	0.125259	0.0949697	0.0282703	0.0505052	0.0490852	0.0350353	0.0419881	0.0375364	1.89116	2.03723	1.62214	0.653216	2.12362	0.201489	0.0707064	0.0586484	0.0756972	0.470344	0.277997	0.459866	0.377961	0.228847	0.149963	0.0669197	0.117785	0.146291	56.3361	54.8162	50.1003
ENSMUSG00000003411	Rab3b	12.4718	11.0122	11.7139	13.0411	12.9102	14.008	20.2133	17.0283	16.2575	9.87258	11.1395	12.3874	9.35785	9.03787	8.35232	9.62873	10.8245	11.1219	8.60571	7.15249	6.63728	17.0256	21.7798	19.4882	5.14775	7.30949	8.68905	11.3369	12.1127	10.3813	5.87211	4.91131	4.52583	8.73268	6.99185	6.9524	12.4838	13.2925	11.4521	11.6601	9.38738	9.93657	10.8288	11.1303	11.3661	25.0611	24.7082	22.217
ENSMUSG00000003418	St8sia6	10.6447	13.2911	11.988	0.138089	0.147565	0.0686913	0.0303262	0.0544732	0.0388972	0.268527	0.255039	0.207772	0.348332	0.202815	0.167596	0.261751	0.135418	0.166227	0.958136	0.664495	0.812903	0.571698	0.836419	0.608107	0.749716	0.678609	0.629553	1.19451	0.663683	0.917541	2.20007	0.603153	0.869765	0.304612	0.283686	0.30563	0.264354	0.214582	0.24571	0.291861	0.227542	0.175269	0.225779	0.34755	0.156906	9.66725	9.46468	8.69084
ENSMUSG00000003420	Fcgrt	0.195966	0.0739731	0.123281	0.125703	0.168987	0.201577	0.145057	0.153857	0.17013	0.106248	0.100947	0.115161	0.16116	0.182538	0.131086	0.206248	0.390778	0.378926	0.230356	0.416669	0.254084	0.174789	0.0851946	0.0912956	0.278277	0.173168	0.232327	2.48926	3.27016	2.59518	3.35243	2.67489	2.28382	2.00463	2.15817	2.40425	8.17126	9.32297	7.53986	6.16063	4.90011	5.60034	8.43278	7.47409	7.42365	0.621287	0.574843	0.413802
ENSMUSG00000003421	Nosip	77.6998	69.4369	74.6626	64.1513	70.6969	71.1954	80.3053	70.0106	65.181	64.7799	64.5376	73.3075	70.9964	67.0831	79.2814	68.0046	60.6865	68.0214	70.1942	71.6769	76.2994	79.4677	77.0386	72.3741	80.025	70.4607	73.1214	66.2674	77.8996	62.9719	71.5654	76.1766	62.8357	75.9896	73.9354	71.6541	68.9358	80.6583	61.0257	76.4075	66.7721	75.8922	73.9408	62.3009	72.4093	78.9915	78.4212	74.2948
ENSMUSG00000003423	Pih1d1	110.424	100.041	108.576	99.5105	93.1971	118.85	118.496	94.3064	100.444	77.6648	71.0908	76.8165	77.3804	80.6031	82.197	73.1364	77.9223	75.4947	69.4817	77.2769	72.4872	70.2541	80.563	77.872	75.2481	88.9611	81.7264	113.209	104.802	102.417	153.182	110.346	110.746	99.952	98.2074	93.1726	77.071	87.0864	74.3732	91.0666	76.9973	90.0338	83.6702	76.1376	82.0304	87.818	80.9956	79.0663
ENSMUSG00000003429	Rps11	1407.09	1614.33	1420.27	1336.66	1398.17	1371.29	1602.96	1542.07	1466.75	1999.08	1807.93	2022.03	2080.7	2065.5	2136.79	2143.8	1980.26	2096.31	1238.54	1290.68	1443.93	1345.98	1242.85	1298.55	1358.8	1423.11	1352.12	1649.47	2128.78	1789.94	1447.82	1690.68	1953.43	1889.57	2142.68	1731.54	1775	1930.17	1816.07	2057.56	1825.34	1934.77	2089.02	2037.71	1996.79	2032.88	1906.62	1846.69
ENSMUSG00000003435	Supt5	75.389	79.6514	75.1065	73.1003	77.928	78.4664	82.8619	77.7464	64.7711	75.6177	74.3675	80.8135	74.7071	77.0441	77.6326	78.3717	73.4432	74.651	59.2781	65.2066	75.0772	63.8702	69.0006	66.9705	63.0176	68.3173	70.8038	72.1317	60.8355	67.1173	81.8281	73.4459	72.2505	74.5667	81.6958	71.7207	77.5573	78.9678	77.9852	79.7251	74.8309	78.0377	77.3251	72.5245	74.8021	82.261	82.3308	78.5683
ENSMUSG00000003436	Dll3	3.95667	3.73957	3.58795	0.230908	0.0883663	0.23572	0.226471	0.158105	0.148314	0.0483348	0.115729	0.219914	0.169457	0.0634187	0.0208717	0.0469927	0.124441	0.104002	0.0512411	0.359741	0.11466	0.0186792	0.0886466	0.0487114	0.0892549	0.212768	0.0893103	0.0635857	0.968093	0.587498	0.292732	0.415688	0.0721588	0.0903452	0.0640931	0.0341857	0.274365	0.164177	0.0925502	0.198851	0.140447	0.229377	0.212308	0.157197	0.189355	5.03381	6.20367	6.03401
ENSMUSG00000003437	Paf1	151.071	138.847	141.125	131.305	142.25	160.301	126.878	134.433	138.312	86.8478	86.8739	85.1159	78.643	79.3209	96.8423	80.2446	75.0718	88.1691	105.367	111.402	121.556	118.237	119.884	127.013	121.632	113.302	127.826	126.588	179.683	104.392	137.021	126.415	126.97	132.67	153.333	130.827	89.4074	80.5831	65.4374	77.4838	85.0617	80.2696	76.6258	60.4009	77.2694	95.4269	98.176	88.6403
ENSMUSG00000003438	Timm50	88.4263	82.0232	85.0794	66.5724	66.1244	67.3178	84.3229	70.2855	63.4496	73.3697	70.0542	82.6153	77.4115	85.2437	81.4209	77.9954	75.5149	77.6183	65.2925	69.6902	72.1258	63.9567	64.7562	66.7956	71.0432	61.9946	72.8021	86.792	115.969	87.1043	83.8729	83.9746	70.0616	87.149	77.1949	76.7407	81.5946	98.2643	87.8559	95.8191	90.3137	99.1285	94.2499	94.5063	93.5192	95.5468	96.7803	98.0207
ENSMUSG00000003444	Med29	22.059	21.6864	21.2483	18.3887	19.78	22.5738	22.8663	22.4932	15.9941	18.1567	15.7592	17.537	19.159	18.2938	17.4352	17.3166	16.6775	16.3135	21.1341	17.0115	17.9875	19.013	19.2993	16.0491	16.9027	17.8054	16.1045	22.8208	23.9049	21.199	21.9748	21.8243	21.049	27.1111	23.6927	21.6521	16.1211	19.3544	17.5329	17.8437	16.7386	17.9713	17.4982	15.6532	18.7626	19.3656	17.5663	17.301
ENSMUSG00000003452	Bicd1	6.93825	7.87534	6.4255	5.02253	5.09616	4.63114	3.90707	5.54684	3.77966	1.97289	1.68542	1.5547	1.81398	1.85628	2.31277	2.29438	2.38702	1.91253	1.03459	0.986292	1.05507	0.901087	1.15175	1.22328	1.48641	1.17883	1.01903	2.08027	0.391437	2.03235	2.33173	1.59498	1.23789	1.76812	2.15685	1.81275	0.791201	0.801009	0.67989	0.565896	0.808546	0.598914	1.31052	1.52174	1.56356	6.74984	7.06434	6.05037
ENSMUSG00000003458	Ncstn	67.0396	68.511	64.2022	64.2358	67.526	69.0841	75.7177	73.5144	66.1493	80.4742	79.8232	85.3006	75.0747	76.1567	73.2462	74.2987	74.675	75.0563	75.6428	80.295	90.5885	68.3401	71.2092	73.825	68.0692	69.9585	76.1082	48.4731	40.1248	45.489	44.9676	45.5389	44.6811	45.6211	48.3527	45.0558	54.4497	52.2426	45.3458	52.0832	49.4721	46.6834	50.746	43.6897	43.5899	72.9898	74.2956	73.2494
ENSMUSG00000003464	Pex19	156.446	149.609	151.812	157.408	156.456	164.439	176.075	161.087	155.098	142.911	134.086	154.383	149.144	145.521	151.861	149.356	138.291	137.728	132.634	124.195	129.22	128.762	126.186	123.647	122.746	129.527	120.417	155.431	143.185	165.957	173.845	168.752	176.256	172.155	168.283	172.495	154.251	172.811	153.096	174.35	155.713	179.712	177.642	160.34	178.912	149.107	141.529	138.78
ENSMUSG00000003469	Phyhip	8.44725	7.98671	7.70529	2.52006	2.80104	2.64017	3.14431	2.45988	2.60303	1.42664	1.60925	1.95506	1.2198	1.22834	1.40903	0.992654	1.16888	1.36903	1.64165	1.64011	1.65753	1.8815	2.89291	2.42349	1.41269	1.66648	1.78118	0.88432	0.862801	0.609885	0.234533	0.197654	0.634053	0.092561	0.211585	0.276629	1.27206	1.67806	1.46192	0.499939	0.541568	0.486219	0.478861	0.667472	0.62894	9.33942	9.89207	9.84641
ENSMUSG00000003476	Crhr2	0.0110475	0	0.0506707	0.00867457	0.0806877	0.0357818	0.0384761	0.0222661	0.0667448	0	0	0.023809	0	0	0	0.00910957	0	0	0	0	0.00830398	0.00905532	0.0861844	0	0	0	0.0103106	0.0719097	0	0	0	0	0.0299717	0	0.0103492	0	0.00956158	0.0999349	0.00996787	0.0201013	0.0217273	0.0091354	0	0	0	0	0.00847028	0
ENSMUSG00000003477	Inmt	0.154408	0.0625201	0.284672	0.120697	0.106708	0.0302758	0	0	0	0	0	0	0	0	0	0	0	0	0.029993	0	0	0	0.0490087	0.0263262	0	0	0	17.4897	17.8537	18.6346	4.25519	3.21471	3.6011	0.0889069	0.178918	0.0770364	2.79319	3.15138	3.83371	0.338438	0.142264	0.419426	0.424991	0.233316	0.304312	0.205997	0.214366	0.0478561
ENSMUSG00000003484	Cyp4f18	0.130283	0.0628685	0.111081	0.0505273	0	0	0	0	0	0.0578596	0	0	0.0567747	0.0169907	0	0.0150822	0	0.0648897	0.014734	0	0	0	0	0	0.0603272	0.0519691	0	0.0575038	0.0875589	0.121078	0	0.117768	0.0829246	0.0173926	0.0172695	0.0302	0.0559799	0.0659281	0.0663471	0.132455	0.0645029	0	0.110901	0.218477	0.212652	0.0151435	0.0531226	0.0705954
ENSMUSG00000003500	Impdh1	29.1927	24.9652	25.6248	23.8851	23.945	25.268	31.4051	24.3547	22.6737	22.2436	20.0853	20.8253	19.9719	22.3468	20.9767	21.906	22.072	20.1184	16.914	18.8442	17.6908	15.7202	17.5728	16.7418	19.5872	18.0409	20.7238	36.0243	41.445	33.9898	30.794	30.3192	32.2673	36.7799	35.4046	34.7133	23.3084	26.1594	23.495	23.8094	21.3294	22.5807	24.7228	26.2271	27.0984	26.167	25.8081	25.3657
ENSMUSG00000003505	Psg18	0	0	0	0	0	0	0	0	0	0	0	0	0	0	0	0	0	0	0	0	0	0	0	0	0	0	0	0	0	0	0	0	0	0	0	0	0	0	0	0	0	0	0	0	0	0	0	0
ENSMUSG00000003518	Dusp3	4.93806	5.59489	5.48119	3.88881	3.84227	4.3974	3.49181	3.1131	2.64928	1.77586	1.97998	2.10887	1.29399	1.18163	1.74565	1.59193	1.22755	1.55312	1.82557	2.18685	2.2772	1.41021	1.24775	1.20827	1.38769	1.90046	1.23758	9.12759	6.88516	8.92248	9.81699	5.87526	7.23567	6.55685	5.64535	6.07066	9.47131	8.75368	7.86496	7.49994	6.64972	5.92793	8.78621	7.95364	8.09985	4.96027	4.75452	4.17596
ENSMUSG00000003526	Prodh	9.3173	10.4129	9.14969	7.39298	7.51885	7.85073	9.46629	8.74817	8.08929	8.7275	7.74388	8.085	8.00269	7.90911	8.46884	8.55603	8.17478	7.54422	5.9547	6.72022	7.70844	5.65295	6.00458	5.2474	8.85616	7.23011	7.62949	12.3775	12.2398	11.0275	10.0855	10.9685	10.4146	10.8156	9.09604	10.3961	7.65587	8.85108	8.09416	6.27574	6.41059	7.3155	7.80287	7.72953	9.48081	8.48832	8.3988	8.63353
ENSMUSG00000003527	Dgcr14	25.7546	24.5932	25.9688	25.5004	25.4797	26.8444	29.2103	27.5222	25.9575	23.3327	22.0171	26.0388	24.4094	24.3689	26.1923	25.1035	23.0108	24.9699	21.3609	20.4473	20.825	20.9503	20.6875	19.9137	23.0448	22.9802	21.6027	30.3377	29.537	28.6617	29.7299	28.4403	28.2208	29.656	29.2821	27.9603	28.1604	30.2155	29.5786	30.9339	27.2832	29.7983	27.5789	26.3543	27.9836	24.1527	25.7486	24.7319
ENSMUSG00000003528	Slc25a1	66.3383	72.0503	70.9297	66.6055	73.5807	65.7048	68.9216	70.5657	67.112	49.5193	48.162	51.2376	44.8121	46.2622	50.2125	44.9973	46.3027	46.9655	42.7583	47.4914	47.4951	43.0229	43.5694	42.6897	45.225	45.9823	47.0562	55.763	50.7514	50.1101	62.2315	69.0723	71.4855	69.5246	73.2793	61.8616	50.0306	50.621	47.6782	52.7764	48.76	53.386	51.6723	45.0801	50.1773	51.4332	53.9568	55.5057
ENSMUSG00000003531	Dgcr6	80.6116	71.4947	78.8637	73.5693	76.3884	71.4289	81.7583	70.4912	60.2018	65.4954	61.3292	73.171	71.8534	74.8082	74.1319	71.1405	65.4808	70.3498	56.7776	57.7722	51.7735	55.8123	56.8103	56.2344	64.5594	60.7005	56.3978	85.304	127.036	88.5358	97.3141	87.9813	85.1355	93.072	74.1993	81.374	87.4774	113.071	92.1641	99.4769	94.7056	110.808	86.8934	86.612	95.2925	77.0473	82.2613	77.902
ENSMUSG00000003534	Ddr1	83.5151	70.4512	80.3063	101.555	94.1446	111.717	128.49	105.287	86.3452	182.645	161.978	178.196	170.489	164.636	157.904	163.021	149.256	146.539	157.217	164.492	170.962	152.635	161.505	159.462	136.214	154.078	163.013	2.41222	1.265	1.81778	1.93724	2.57331	1.47076	3.94179	4.5535	4.44316	10.5905	9.37315	7.05682	9.78775	6.68303	6.3733	19.91	16.0408	12.9703	116.754	114.076	108.843
ENSMUSG00000003541	Ier3	0.951526	1.36735	1.44547	1.0946	1.47134	1.55691	1.3618	1.25783	1.4089	5.76446	3.90334	4.94088	4.18848	3.35411	2.35438	3.22501	2.76502	2.20096	13.7625	11.0411	16.5164	10.245	9.89722	11.1452	9.09077	8.13941	8.30175	3.90817	2.73083	2.54967	1.77417	1.53519	1.25581	1.01237	1.18448	1.25097	4.71799	5.3314	3.79487	2.97404	2.68158	2.37393	2.12811	1.45112	1.87444	1.72447	1.44508	1.29498
ENSMUSG00000003545	Fosb	4.02457	1.90845	1.87477	6.79592	3.33843	2.00026	1.85991	0.969356	0.661547	40.7063	67.0385	53.2961	16.5991	27.5396	13.3194	16.1022	25.7855	20.4263	36.2318	28.5535	17.6999	23.5223	21.3541	16.1866	31.9584	24.1471	20.5359	0.600287	0.130084	0.0954385	1.06708	0.276272	0.203626	0.0369369	0.0653107	0.0128478	3.25513	3.56587	2.48366	4.8522	2.23438	2.64628	1.87563	1.61431	2.31127	0.966463	1.09116	1.72879
ENSMUSG00000003546	Klc4	22.1096	20.7143	20.4369	16.4777	17.4664	17.2176	15.6802	12.442	11.3304	12.4429	11.8232	12.7902	13.2569	15.0971	15.264	14.2329	15.0142	15.7243	8.90643	9.35974	9.13933	8.22103	8.94459	9.4652	10.905	10.2891	10.4267	12.2089	13.0185	11.979	15.2236	13.038	13.8587	14.8905	14.5831	13.9887	17.5379	19.0412	17.6554	20.6088	19.6957	20.5518	17.6289	18.3966	18.4658	25.5438	25.8252	23.1059
ENSMUSG00000003549	Ercc1	40.8041	43.8231	44.6287	44.4424	49.6539	52.6703	57.3219	48.8201	41.7117	38.045	36.3414	44.0389	41.7668	36.9218	42.6037	41.6293	43.413	36.7918	33.9448	36.7861	39.89	35.7105	36.3871	39.2986	39.8385	38.897	43.7155	36.3211	49.6985	35.4206	31.6251	34.776	38.5744	44.3201	33.8233	34.4315	45.6921	45.0305	34.8755	50.3405	43.052	43.3082	49.8577	40.7957	49.3986	40.6967	38.9379	43.457
ENSMUSG00000003555	Cyp17a1	0	0	0	0.0532538	0.0878349	0.0686088	0.0789771	0.0705779	0.0442153	0.173486	0.192322	0.188059	0.179124	0.0790363	0.109251	0.294736	0.186105	0.442009	0.43924	0.272736	0.28043	0.333262	0.271091	0.29263	0.320077	0.477327	0.316381	0	0	0	0	0	0.0154262	0.0647353	0.0641932	0.0843196	0.0147422	0	0	0	0	0	0	0	0	0.0140939	0.0130406	0.0131448
ENSMUSG00000003559	As3mt	16.0449	15.2983	15.5789	14.1898	14.5997	13.9147	16.9967	15.8616	15.423	10.5976	10.4359	11.9541	8.39851	8.44602	9.8275	9.4191	10.2502	10.496	7.42545	7.10089	8.65777	7.20873	6.9454	7.61151	5.73271	6.9274	7.52953	20.6149	29.1779	20.269	20.6102	20.3744	21.9343	20.7042	21.1728	22.1905	25.0667	27.3154	22.7696	22.4325	19.4155	21.6875	16.6067	13.5267	16.6265	13.0291	13.9703	14.2305
ENSMUSG00000003573	Homer3	95.4682	89.237	89.8713	100.149	106.933	104.121	103.614	94.4588	83.7301	75.1119	69.4829	86.5164	77.6033	84.1368	89.3976	75.1182	77.2181	77.3086	53.5069	52.7836	51.5333	50.3486	51.571	50.795	52.8492	50.6776	51.7309	127.796	108.953	128.422	150.044	131.458	126.351	117.935	130.758	119.24	103.746	121.318	100.029	96.8031	91.9258	99.5093	85.8705	84.9502	96.9039	69.6314	69.7516	70.0225
ENSMUSG00000003575	Crtc1	18.388	18.3104	18.0776	16.9514	17.649	18.6871	17.1156	16.739	13.4269	15.9438	15.9394	16.2274	16.4605	16.5971	16.0082	16.481	15.9519	14.3844	16.5101	17.1562	18.0511	15.9141	16.5807	15.7083	17.4969	15.8719	18.1349	17.3151	12.0625	15.0591	13.6232	15.9504	15.6233	16.0203	14.1664	13.2123	20.8978	19.6545	19.8514	20.2447	19.6639	18.6759	20.1171	18.105	19.483	17.0488	16.9483	17.456
ENSMUSG00000003581	Rnf215	16.0752	14.2421	14.2847	16.1452	17.5464	16.4731	16.6529	15.1869	12.8304	19.9503	21.6164	23.4348	23.0054	24.56	24.001	22.4784	25.0826	23.4298	24.1388	27.2451	27.9558	24.4477	25.3508	24.8073	33.276	25.8991	31.5176	12.8626	15.0687	12.5471	13.3373	13.2932	14.7556	14.41	16.1103	13.888	24.9254	26.0623	20.9179	23.0501	24.2566	23.3627	23.0396	20.0698	21.4517	20.9728	19.0968	21.9762
ENSMUSG00000003585	Sec14l2	5.32733	6.1285	6.01334	2.42165	2.76177	2.66081	1.78985	1.90385	2.32106	1.43212	1.29087	1.53399	1.21853	1.46122	1.7867	1.75744	1.84427	1.52046	1.51176	1.78039	1.40203	1.07015	0.902075	1.03308	1.60498	1.64234	1.45991	3.55566	3.80691	3.29921	3.05047	3.3332	3.599	2.69751	3.28146	2.92754	3.05702	3.19646	2.45583	2.87993	3.09175	2.98897	2.32758	2.26708	2.18889	8.23998	6.89878	7.15126
ENSMUSG00000003604	Aven	26.4987	23.9341	26.2245	27.3794	26.0606	22.9	27.2828	26.9546	27.9636	22.3832	21.4263	23.9262	23.0401	23.8842	25.2568	23.4901	22.7009	24.0178	21.1307	20.4935	20.8878	19.1049	19.9311	18.2637	21.6956	22.7159	19.8283	37.1447	44.0888	36.9132	41.815	35.5331	41.9458	39.2062	38.7472	32.9693	25.6756	27.079	22.4281	22.5004	25.943	24.5933	25.0141	26.8168	24.2941	22.9773	25.0867	21.8374
ENSMUSG00000003617	Cp	0.00944164	0.0960411	0.00729577	0.176802	0.033278	0.170925	0.14661	0.0788281	0.098752	0	0.00693419	0.042621	0.0934417	0.0854857	0.0551867	0	0.00688681	0.14065	0	0.00616222	0.0706554	0	0.018006	0.0116015	0	0.00612966	0	0.240744	0.417796	0.238323	0.040091	0.172605	0.194282	0.0748862	0.362135	0.148764	0.108169	0.0523218	0.0161975	0.305756	0.121607	0.15018	0.15587	0.148996	0.0919968	0.0483454	0.0359911	0.109288
ENSMUSG00000003623	Crot	21.2362	22.3152	23.3233	24.6314	25.5123	25.2553	26.6894	28.0062	31.006	45.3698	44.502	44.6564	42.6621	40.4245	39.5274	50.174	48.209	48.7574	33.5355	30.6572	31.6415	32.1645	30.2442	31.2454	34.7177	39.2705	33.1186	26.5934	28.0601	29.1163	26.8919	29.2525	32.2582	27.9749	28.8429	27.8379	37.8802	36.4733	34.5203	37.1951	33.9308	35.4946	31.6687	31.7646	33.0121	28.6562	27.2263	25.5111
ENSMUSG00000003644	Rps6ka1	42.6387	41.5799	36.8903	37.5602	39.8606	39.6124	43.4859	36.916	33.199	31.4094	30.8105	32.3458	34.0841	33.1764	35.6875	31.9147	33.2542	30.2868	28.2816	29.1664	30.9391	26.9638	27.814	27.0679	29.6338	29.3039	33.1752	32.8383	23.9168	33.1329	41.7036	30.1054	29.3913	29.6374	31.9882	29.6793	30.8149	31.7031	27.1425	28.5346	27.3681	25.4568	29.4939	29.0935	28.7133	38.0226	38.6929	38.5475
ENSMUSG00000003657	Calb2	0.19971	0.0184492	0.187621	0	0.0574388	0.0179358	0.0258439	0	0	0.0568883	0.0420129	0	0.0167602	0	0.0409412	0.0551512	0	0	0	0	0	0	0.0529789	0	0.0192193	0	0	2.64884	2.32688	3.02656	0.650301	0.447974	0.38466	0.106025	0.147993	0.257581	6.10589	7.84392	9.18425	0.302731	0.605407	0.842545	0.0371656	0.125219	0.0546979	3.9854	3.65301	3.78069
ENSMUSG00000003660	Snrnp200	86.4381	90.1472	72.9628	87.3966	94.713	79.7648	89.0501	84.2522	73.67	83.4716	95.2829	91.6799	81.1408	84.8885	81.1479	81.3463	87.7282	81.3981	66.292	78.4205	99.9201	64.9761	76.0686	84.2373	68.7942	69.9668	88.6751	81.0099	85.4057	70.3944	80.2589	81.5506	68.5347	77.7854	79.448	70.2365	80.1574	80.863	77.331	67.2278	94.6005	77.6153	77.8026	66.2554	74.2854	77.8602	86.1987	80.3142
ENSMUSG00000003662	Ciao1	80.6139	66.5078	68.67	65.55	71.1562	67.0567	74.6316	59.1854	56.772	55.3881	53.9229	60.6899	57.5965	55.6033	62.4675	60.5695	51.4692	55.0993	50.1541	53.5392	54.5244	57.6107	58.9558	50.4602	54.5168	61.1013	54.2123	59.2606	64.8387	58.4612	76.254	59.8582	64.4188	60.8376	63.1599	58.635	58.8549	62.2341	53.6601	57.9022	57.9672	59.9922	55.0196	56.0133	57.1041	69.5332	70.0633	64.1501
ENSMUSG00000003665	Has1	0	0	0	0	0	0	0	0	0	0	0	0	0	0.0135127	0.0133428	0	0	0	0	0	0	0	0	0	0.0126352	0	0	0	0	0	0	0.0469341	0	0.0553701	0.0136921	0	0.0126075	0	0	0.0131759	0.0123697	0.0262519	0.0485875	0.0272495	0.0478097	0	0	0.0112549
ENSMUSG00000003680	Taf6l	50.8784	50.387	47.9511	46.1563	46.0141	47.5572	51.0012	47.0115	42.002	45.1531	41.3077	47.4093	45.7273	47.5751	46.0745	47.5412	47.8772	46.5699	43.9817	46.0506	48.0505	43.1275	43.2701	48.3636	44.2425	47.9406	48.9461	42.2415	54.8367	40.3	37.377	37.1794	30.8061	40.593	36.6664	36.4715	40.5657	42.7603	40.4038	46.7311	43.3685	44.5576	43.7096	41.5148	45.5518	50.4311	51.5357	51.5905
ENSMUSG00000003721	Insig2	16.4951	16.2594	18.1761	16.2149	17.4837	13.5691	13.0057	13.4964	17.7604	20.8135	21.3548	17.9124	20.1694	20.5986	21.2433	18.8209	18.2929	19.3772	19.4916	18.825	17.7104	19.9567	19.4124	15.6038	18.3263	22.49	15.5455	11.0269	10.3171	20.2198	19.9655	13.6563	12.317	9.64921	15.9198	16.6231	14.4571	16.9393	13.9646	14.3905	14.2587	15.4919	13.1338	13.0738	13.8649	21.409	20.2075	19.962
ENSMUSG00000003731	Kpna6	28.4937	29.7261	29.2796	25.9697	24.9172	25.8385	26.7063	28.4629	29.3791	31.164	30.463	28.1422	32.2207	29.9824	28.0119	32.715	29.7225	31.0655	31.9528	30.6453	30.0244	31.7562	31.7648	29.8156	31.0832	32.2804	31.6658	27.9292	20.0761	29.7832	26.4663	28.9361	29.7023	28.0039	26.7288	28.4873	32.9281	30.1295	26.7197	30.8152	30.1806	27.8268	27.9543	26.0127	27.2302	33.5809	31.5238	30.1459
ENSMUSG00000003746	Man1a	2.26819	2.02118	2.06479	3.93192	3.83234	3.90046	2.14192	2.93694	3.14854	8.42266	8.76242	10.4018	8.18822	8.46516	8.43392	5.80472	6.27376	6.40392	8.06491	7.05848	7.86885	6.12241	6.47368	6.20561	5.43111	6.5186	6.45882	1.87115	1.68614	1.93623	1.81254	1.9465	2.19952	2.34667	2.25211	2.30437	4.01069	3.44873	2.75124	2.90621	2.59263	2.22296	2.53943	2.13309	1.93465	4.34487	4.34508	3.92168
ENSMUSG00000003752	Itpkc	14.3262	12.7197	12.1191	19.3117	20.2253	19.8975	19.7246	17.821	15.5167	25.5589	25.4997	28.6178	22.0399	22.5295	22.3896	23.9539	24.2147	24.0747	22.2997	20.5482	21.1952	18.375	17.5791	16.892	19.9592	19.7726	18.5466	8.13569	7.40227	8.40646	11.3822	8.81411	8.04735	8.96423	8.59491	7.96752	12.0654	12.3463	10.4859	12.2977	11.551	10.6686	12.9309	10.7763	11.2937	15.6233	15.4533	15.5351
ENSMUSG00000003762	Adck4	21.3949	20.382	19.018	20.1688	21.0552	23.3236	23.9832	18.1191	15.539	15.6377	16.5005	16.4144	17.9481	17.5277	17.9045	16.1904	17.5607	16.7301	19.2528	19.5098	23.7992	18.6713	19.9439	19.0051	19.5917	19.3371	20.8	10.9907	13.8367	10.5638	15.0447	14.1026	15.6636	15.8436	15.6187	12.5331	12.7315	13.6722	12.3426	12.7249	11.474	11.73	14.4668	13.2678	15.5951	21.2879	18.4176	19.0142
ENSMUSG00000003778	Brd8	65.4309	64.303	57.8875	61.5973	66.6018	62.0745	69.3625	62.2646	69.7576	54.2083	53.2782	54.5358	55.0276	55.8201	58.8504	56.5912	54.2536	59.2185	49.4089	45.5014	49.1473	48.8144	48.8818	50.3293	54.2705	49.1188	50.5224	78.9948	64.9299	77.7013	101.306	79.8672	92.1972	77.805	101.045	85.8506	73.2895	70.2188	70.1838	75.0934	67.0671	68.2797	70.6224	64.2583	71.2633	61.8757	57.5425	56.1994
ENSMUSG00000003779	Kif20a	105.997	120.168	111.088	109.699	113.745	104.762	124.868	126.836	122.257	89.6792	91.8598	93.9036	92.0966	93.3522	94.5384	90.2345	91.0989	84.5472	70.1694	73.4174	74.5881	79.157	87.7891	87.5847	76.5005	89.0787	84.8687	148.377	126.756	142.755	138.622	150.123	149.551	150.088	152.942	143.343	114.085	120.364	106.832	128.811	133.199	125.89	116.176	106.851	116.853	93.9636	91.109	81.5854
ENSMUSG00000003808	Farsa	66.64	70.6888	67.5711	56.6762	61.8818	60.5553	73.9932	69.091	56.5442	68.2779	61.1317	68.5637	71.2189	71.374	73.2906	69.9878	68.8034	63.9939	56.1672	63.4225	68.2512	57.8998	64.2833	63.5401	61.5662	62.4586	69.1076	76.4901	77.3337	69.7727	80.5397	76.4032	74.3553	80.233	80.6105	72.9798	74.3741	81.1837	68.8217	81.1029	75.689	77.8674	77.9975	71.0453	75.5111	75.1887	73.0228	69.9353
ENSMUSG00000003809	Gcdh	50.623	45.9606	45.6367	45.7713	48.3914	46.3261	47.3209	45.832	43.141	42.4798	41.2326	46.616	45.5369	45.629	46.6706	41.4498	40.6808	40.9249	43.8432	36.8258	41.6403	42.9609	41.64	41.5937	40.6628	39.4243	38.0729	37.2206	44.0745	34.4944	33.67	37.2022	32.9221	38.3729	40.087	38.3411	38.8021	41.5102	36.5581	40.3706	34.7228	36.9213	38.8841	37.8341	40.6394	39.6086	43.8249	42.5438
ENSMUSG00000003810	Mast2	43.5334	46.0438	45.2289	39.9556	38.7369	46.2868	47.315	45.6943	40.3125	37.8658	41.3824	38.8312	37.0535	40.7304	36.5724	40.276	40.9589	35.3176	36.3629	37.191	41.0965	37.4832	38.2003	34.5736	36.4316	31.7803	39.4501	44.8382	30.293	38.7453	39.8567	39.8026	36.7105	44.4598	41.5934	39.4141	40.2533	39.5846	36.9009	41.2926	48.2208	40.8984	43.3831	40.6782	39.799	36.2017	37.5496	35.5392
ENSMUSG00000003812	Dnase2a	12.1756	12.7429	13.8756	15.1107	15.0333	14.1571	16.0835	13.0593	14.2742	23.1975	23.6542	23.818	22.0698	21.8043	21.2204	22.94	21.7958	21.1965	27.1494	26.135	26.778	23.4963	24.4111	24.784	22.3431	24.3502	25.3858	5.45275	5.40223	5.672	6.32612	5.15016	4.46382	3.64511	4.3049	4.05122	12.0856	9.95527	8.50489	12.1778	10.3495	10.7341	10.3224	8.05916	8.59002	22.306	19.8846	19.4767
ENSMUSG00000003813	Rad23a	82.2924	79.6219	86.9267	70.6084	69.6088	74.6407	70.0394	68.1777	63.9333	58.3558	53.6079	57.9366	55.3503	55.8306	58.681	60.8858	54.6553	55.1693	75.106	65.3282	70.5378	68.6367	71.5463	65.5664	63.6862	67.1086	70.8028	62.673	59.9503	58.9607	66.1558	56.2634	52.4133	64.987	59.5646	55.0752	49.0255	55.7265	49.3586	55.3068	47.6766	56.027	57.7722	50.8398	56.1062	65.6638	66.669	70.2124
ENSMUSG00000003814	Calr	958.714	876.199	793.324	763.097	796.194	719.138	864.724	806.989	808.761	683.832	745.361	664.145	623.409	685.151	621.802	545.024	556.801	496.317	679.029	686.445	734.024	687.439	739.009	670.639	651.031	692.866	632.276	896.958	1014.09	861.969	1001.32	869.077	966.987	867.163	1006.95	874.32	836.09	856.249	696.808	778.796	823.212	750.875	739.056	738.236	639.026	688.312	736.071	596.539
ENSMUSG00000003824	Syce2	64.5301	68.9999	74.1549	60.5422	55.6821	58.6815	54.4048	55.7431	55.0676	43.8237	40.577	46.7155	55.0786	49.6345	56.0957	51.5599	45.7622	43.9109	56.7762	57.9253	50.6648	62.363	63.1138	67.2971	56.6613	60.299	64.3576	66.3993	99.5151	70.2283	72.9218	63.9756	71.9657	76.3345	64.2038	65.6982	64.2573	71.1901	60.3676	69.6126	63.5937	75.2456	77.31	67.5439	80.4852	55.8702	57.9817	55.4303
ENSMUSG00000003847	Nfat5	17.3983	16.4336	14.134	20.5712	27.7578	23.632	18.3074	18.1894	21.6278	26.9439	28.0944	23.2355	21.5637	20.1183	19.6377	20.5921	21.5737	19.7451	31.1456	23.0333	23.0096	20.8303	23.0598	21.8248	19.6652	17.0097	20.7146	9.25877	4.99131	13.821	8.74217	13.9387	16.565	9.88346	13.6619	10.61	17.184	13.834	11.8758	12.5358	16.2481	11.298	13.2022	10.4375	10.8317	17.7824	16.8421	14.9763
ENSMUSG00000003848	Nob1	61.8831	59.7462	59.1191	52.3311	51.3711	52.9799	58.7955	56.3673	57.5905	54.5549	49.7372	53.749	58.7464	59.5704	58.9448	62.1868	58.3611	64.0156	50.4001	53.8091	58.8109	53.7705	56.151	56.7074	58.0433	58.159	61.8739	69.9899	80.2917	74.6078	83.9706	75.823	77.8506	73.0527	75.0185	72.3078	62.3401	71.5196	63.5353	73.1459	63.7838	69.0919	64.8542	66.3289	70.8161	60.2891	61.1095	60.6052
ENSMUSG00000003849	Nqo1	2.16228	1.8304	2.08173	1.90014	1.86519	1.225	2.30519	1.17089	1.77241	2.32816	1.87274	2.20505	2.10451	1.88543	2.19683	1.70624	1.47998	1.99581	1.99024	2.03616	2.10751	2.74028	2.91289	2.55358	2.48757	3.09137	1.78706	6.91284	9.15704	7.72822	5.97347	7.17905	7.52891	8.33445	6.94876	8.53971	13.0251	13.5073	12.5833	11.8621	10.6074	12.1811	12.0757	10.3675	12.8036	2.92188	3.18496	2.83236
ENSMUSG00000003863	Ppfia3	16.9179	16.2199	16.1747	10.2149	8.81983	9.718	10.1104	7.97841	6.71011	16.5151	16.1877	17.4057	14.9448	13.4393	12.9572	13.9887	14.3397	13.4941	16.9438	16.7641	17.9536	14.6207	14.6639	13.134	17.325	16.392	18.9637	2.9444	3.51857	2.20739	3.30298	3.17025	1.40933	2.94013	2.04373	3.17227	6.06424	7.17022	6.06487	7.61873	6.28069	6.43348	4.92263	4.34727	5.00334	23.8884	23.5216	26.5993
ENSMUSG00000003865	Gys1	35.2402	33.135	31.0351	36.2948	36.8069	35.717	37.5483	34.7001	30.5312	38.6757	36.9477	40.3266	35.7597	37.4093	36.6184	34.2447	36.3327	34.0964	35.6842	38.8412	46.8033	33.3042	35.509	36.7454	34.7523	38.3708	42.0337	33.2542	24.9476	28.2447	32.2206	33.8683	34.5947	33.8777	34.7099	31.1568	35.9536	36.8866	32.9873	37.2113	39.2469	37.6408	35.134	29.8334	33.8563	33.384	36.5916	32.559
ENSMUSG00000003868	Ruvbl2	131.967	131.084	124.38	107.675	114.233	110.284	143.864	125.671	108.348	107.024	97.7438	111.543	109.096	110.727	111.23	104.415	104.79	103.494	78.8787	86.6203	92.3172	84.5914	87.7145	90.4358	84.5997	83.6943	93.2162	140.364	143.054	134.061	169.418	140.113	139.155	142.156	150.46	133.791	99.363	105.548	102.049	111.064	103.024	110.35	109.509	108.739	108.349	132.344	125.127	123.105
ENSMUSG00000003872	Lin7b	0.616556	0.579435	0.732884	0.479922	0.530374	0.477613	0.634797	0.231741	0.256555	0.433556	1.31649	0.777344	0.443082	0.805868	0.74855	0.520909	1.22393	0.645921	0.756214	1.11151	0.886045	1.58374	0.926403	1.29998	1.36156	1.28575	0.84145	0.240737	0	0.0950656	0.726034	0.67729	0.092854	0.365363	0	0.166572	0.808876	0.482932	0.597335	0.555145	0.46743	0.571948	0.634218	0.774975	0.524256	1.31564	1.02089	1.20219
ENSMUSG00000003873	Bax	167.936	140.833	143.469	147.595	150.636	151.862	197.363	148.532	143.999	137.986	121.602	135.741	137.021	135.001	149.088	130.309	123.144	128.676	121.857	128.494	129.673	124.327	116.326	123.012	119.029	106.384	115.946	156.152	170.908	147.771	225.007	155.029	155.482	148.965	152.374	143.221	119.583	151.977	131.185	141.233	120.367	150.055	123.742	127.693	131	137.861	136.099	134.238
ENSMUSG00000003882	Il7r	0	0	0	0.0216301	0.0158113	0	0	0	0	0	0.0172546	0.00843476	0.0137863	0	0.00839266	0.00756243	0	0	0.0148937	0	0.0138033	0	0.00733707	0.0156984	0	0	0.00857076	0	0	0	0.0224623	0	0	0	0.0257225	0.00757775	0.0396793	0.0247476	0.0827627	0.0663752	0.0467843	0.00827837	0.0689001	0.0686359	0.0679341	0.00760026	0.0422	0.00710293
ENSMUSG00000003923	Tfam	101.217	111.358	108.655	103.228	101.519	100.997	95.6297	114.802	137.613	94.0537	90.1253	90.7814	100.851	99.8381	115.417	107.884	92.386	113.196	72.3608	68.371	69.3789	76.6302	78.1404	71.2129	78.2731	81.47	66.1443	112.715	119.962	124.201	103.332	122.9	119.641	119.644	139.049	117.774	91.7463	94.1419	89.493	97.4092	95.3477	95.6174	100.874	97.5076	99.4565	106.05	105.272	106.285
ENSMUSG00000003929	Zfp81	10.6791	10.8108	10.9664	11.5881	11.6458	11.6971	10.0336	10.4414	13.2435	13.3438	13.2487	12.3244	14.922	13.8746	14.2929	15.0513	14.2302	15.2382	13.971	12.5118	13.1685	13.9521	12.6436	12.9898	14.1343	14.1256	13.348	10.5083	8.73446	11.6754	11.2478	12.5558	14.2311	11.0353	12.6031	12.7424	13.8505	12.0598	11.9317	13.6664	12.6183	12.6385	13.9109	12.8668	12.735	13.9949	13.1631	12.143
ENSMUSG00000003934	Efnb3	33.0766	33.7632	35.3237	22.8783	20.5344	24.7611	17.8046	19.7907	17.1293	19.9105	18.9733	20.0724	23.0138	22.2063	23.696	20.4136	20.309	19.6962	17.8027	19.1514	18.476	16.609	15.432	16.3748	16.0022	16.4557	17.1108	46.8363	40.3437	45.3186	32.5915	34.1333	35.8035	45.1575	44.8317	43.3929	82.7343	83.064	68.857	70.1838	64.1805	65.5848	76.0283	71.5708	69.1454	38.5787	38.9774	38.6534
ENSMUSG00000003948	Mmd	30.1829	32.8368	33.658	33.2391	32.9572	35.7879	35.7086	38.6663	43.7792	26.508	26.7306	28.789	31.3008	31.6064	31.9768	28.3609	31.0422	31.5114	24.7772	25.3857	23.9348	25.4501	24.9262	27.5005	23.1973	25.3896	26.2248	82.6773	90.352	84.5713	64.5695	71.071	73.0397	72.4197	68.8752	71.6207	82.2509	82.391	72.7714	72.0377	70.6843	71.8606	66.6772	61.1353	64.3402	36.2994	36.6997	34.3619
ENSMUSG00000003949	Hlf	0.507202	0.651804	0.797903	0.663962	1.02204	1.01968	0.424373	0.3202	0.412726	2.1786	2.25249	1.90134	1.78424	1.45967	1.61133	1.38224	1.50732	1.57166	3.01167	2.43287	3.40507	3.18348	3.29701	3.18311	1.86347	1.94411	2.12477	0.382865	0.307776	0.171959	0.28678	0.180663	0.185781	0.276017	0.180839	0.466133	0.4656	0.420526	0.433009	0.551239	0.548705	0.578194	0.506719	0.356255	0.25968	1.18016	0.871345	0.666487
ENSMUSG00000003955	Fam162a	162.477	163.564	176.721	226.525	214.458	197.326	222.05	212.107	232.837	205.671	192.287	195.748	247.369	243.23	265.083	242.124	234.082	243.188	262.254	271.202	247.097	280.554	291.081	273.574	366.973	349.874	336.05	180.014	251.767	184.15	202.477	170.097	174.084	190.372	168.525	176.295	126.029	146.488	126.121	138.552	129.362	142.169	137.962	138.753	148.753	179.484	174.223	181.238
ENSMUSG00000003970	Rpl8	2521.16	2213.53	2341.42	2402.84	2573.79	2280.42	2760.13	2392.88	2083.08	2477.6	2243.27	2656.21	2735.59	2705.35	2963.65	2745.03	2772.98	2662.07	2365.16	2647.79	2472.41	2365.13	2484.35	2580.47	2584.46	2631.45	2666.58	2492.06	3471.02	2447.6	2992.45	2505.63	2347.95	2630.74	2639.69	2397.11	2320.23	2687.37	2206.96	2557.95	2242.32	2558.42	2558.13	2365.4	2623.18	2493.2	2488.62	2366.66
ENSMUSG00000003974	Grm3	0	0	0	0	0	0	0	0	0	0	0	0	0	0.0229955	0	0.00682167	0.00752114	0	0	0.00669395	0.0124582	0.00679595	0	0	0.00721777	0.0269195	0.00773612	0	0	0.00781232	0	0	0	0.00786194	0.0231805	0	0.0644196	0.0446457	0.0671954	0.0972903	0.0211036	0.0672219	0.0207191	0.00773876	0.0204355	0.0205693	0	0.00640927
ENSMUSG00000003992	Ssbp2	58.4822	66.0843	62.7768	68.9803	71.9638	71.5556	50.4593	54.6905	46.877	90.9974	79.9868	77.1239	94.6947	98.2031	88.6133	86.3405	86.8629	69.8237	107.751	112.167	110.986	107.52	114.203	122.871	100.06	113.508	119.084	47.1377	42.5159	42.6232	52.2098	62.9034	66.27	61.8106	60.7957	54.7162	85.8116	91.9117	73.3834	90.5071	80.8059	78.4893	90.2217	80.3441	78.1214	101.314	91.3684	82.6331
ENSMUSG00000004018	Fancl	20.5927	22.8302	22.1526	22.7628	24.9672	21.0808	24.5724	23.4195	26.8394	25.3385	24.8844	26.3974	28.6843	24.9484	28.5828	26.8735	26.1999	23.6678	16.4288	13.1252	14.1335	15.945	15.8072	15.7107	17.3029	18.1425	15.5347	18.8732	23.1965	21.5768	18.3806	19.3073	27.6469	24.51	23.1366	22.3767	24.1999	23.9373	21.4111	26.3379	23.2998	22.4209	25.9974	25.9691	28.1038	28.7063	27.7051	25.681
ENSMUSG00000004031	Brinp2	4.30115	4.11457	4.14079	0.153451	0.082208	0.169033	0.194058	0.323228	0.217668	0.204799	0.237825	0.134403	0.136028	0.174085	0.104674	0.373101	0.379588	0.415183	0.198214	0.118383	0.146878	0.0572431	0.0366027	0.0656161	0.261448	0.187054	0.117279	0.0906804	0.077724	0.0394475	0.0256063	0.146226	0.207429	0.390692	0.458293	0.350922	0.638099	0.620134	0.511137	0.0251872	0.0473617	0.0440074	0.104619	0.119875	0.0802958	6.17853	5.75243	5.57116
ENSMUSG00000004032	Gstm5	143.407	143.284	148.936	141.658	138.886	134.131	153.452	146.273	147.821	152.632	149.356	159.242	134.659	132.272	136.588	124.948	124.981	133.69	111.977	95.7971	101.206	95.2082	84.3343	85.6938	93.3338	87.4639	87.3098	187.853	270.188	196.658	181.325	187.924	214.861	200.996	171.788	188.9	170.771	191.334	166.333	171.694	158.771	177.298	168.308	158.095	163.146	215.251	214.983	187.167
ENSMUSG00000004035	Gstm7	18.822	19.6072	21.1728	10.3949	11.7086	13.327	9.37195	9.11938	8.01469	21.7554	18.1093	20.0621	20.7924	20.2528	19.8423	16.7409	15.8483	19.2486	20.8602	19.3953	19.9808	18.7488	18.2931	17.6979	18.6221	19.6499	19.8807	17.2133	18.7396	15.8519	12.814	16.3278	17.0184	18.2795	16.5374	15.6813	40.5378	40.184	36.5659	32.9042	31.6436	30.9658	34.4495	31.6902	32.9122	40.0267	35.785	36.4948
ENSMUSG00000004038	Gstm3	0.294192	0.265145	0.113048	0.211104	0.275079	0.376522	0.142861	0.127518	0.213	0.251811	0.232381	0.318162	0.259504	0.22941	0.521007	0.406617	0.607758	0.523639	0.138266	0.236916	0.11027	0.259932	0.233945	0.0627568	0.169699	0.396311	0.159554	0.183018	0.112587	0.325321	0.389025	0.217811	0.268909	0.32836	0.257857	0.162743	0.363377	0.510313	0.355536	0.290189	0.460143	0.532145	0.472547	0.415494	0.483377	0.918011	0.792654	0.645622
ENSMUSG00000004040	Stat3	8.9268	9.50633	6.77967	4.88994	4.1965	5.89329	4.94643	5.544	3.80093	6.77927	7.58414	7.60247	8.11744	6.94882	6.51227	7.64855	7.85436	7.34481	11.8823	12.1892	11.175	11.1227	11.8645	12.3508	13.1981	11.9725	13.9074	13.0937	13.6637	14.5652	16.2615	10.6419	12.9151	18.4612	15.3388	13.2498	14.2501	15.5833	13.9762	10.426	12.1684	10.5621	13.8811	14.2498	11.9219	12.6108	11.9815	10.8384
ENSMUSG00000004043	Stat5a	0.239117	0.231951	0.252549	0.243563	0.255172	0.219144	0.316684	0.226789	0.227555	0.298324	0.302813	0.255139	0.44757	0.305456	0.363357	0.352907	0.393483	0.270681	0.672677	0.726162	0.706882	0.732499	0.821039	0.797642	0.729208	0.74574	0.755731	1.84389	1.46427	1.42606	1.44177	1.07171	1.38823	0.756978	0.998281	0.775637	3.56437	3.16342	2.57746	1.36807	1.41753	1.19486	1.67655	1.37942	1.21636	0.296852	0.417463	0.204935
ENSMUSG00000004044	Ptrf	1.47752	1.21004	1.27245	2.29532	1.91595	1.99436	5.24907	4.69499	4.8269	12.8115	12.0205	12.0046	10.6892	9.88318	7.71052	18.3794	17.7635	16.2914	27.093	33.7463	28.8459	23.796	24.8365	28.5829	34.9888	38.7575	38.4674	13.2146	10.9146	12.7886	9.06141	8.79639	8.81078	9.5151	8.66332	8.97319	19.3645	18.6606	15.0599	14.4814	13.6473	11.7799	17.4939	14.6687	15.5496	2.55056	2.72693	1.63707
ENSMUSG00000004054	Map3k11	36.6073	32.3897	33.5626	28.5568	28.3366	32.3445	35.6931	29.26	23.7434	27.9657	26.2738	29.5258	28.1539	28.6434	28.7845	29.3963	28.2347	25.2289	26.7581	27.2841	24.9198	25.3248	23.6745	24.7925	23.5769	25.5091	25.692	28.2932	22.0193	25.9776	30.8046	24.4364	23.949	27.3866	25.3746	25.0629	18.5796	19.7466	17.3285	19.6742	18.2262	17.7169	19.7215	18.1619	19.4795	33.9471	32.8863	30.7122
ENSMUSG00000004056	Akt2	69.0589	67.4337	65.8429	62.3329	67.3015	68.6025	73.1664	69.3934	57.691	58.4875	54.5587	58.5921	59.6902	58.0613	59.8844	56.8886	56.7578	53.3387	56.5372	63.0491	53.9143	55.0508	56.426	65.749	50.8087	56.6877	54.5545	74.7999	38.0452	72.1886	73.5297	78.6652	78.8952	72.3702	68.8724	67.8822	58.3902	61.9089	53.1304	60.553	56.1734	57.7352	59.7668	53.9212	57.1962	53.0166	52.3214	49.3347
ENSMUSG00000004069	Dnaja3	41.8885	41.356	41.5228	37.4127	36.9625	36.0759	40.5875	40.7733	39.7625	35.7183	33.5696	34.8511	37.4399	38.0345	37.3057	38.6648	36.2772	34.8155	31.3771	34.3432	34.0088	30.0553	34.499	33.7964	31.4316	37.3042	36.327	36.729	36.7177	38.8312	41.0579	39.8486	41.5993	42.5019	43.2539	38.3481	31.7792	33.6744	27.8442	32.2303	32.469	31.9827	36.3309	31.4457	33.0718	41.0775	40.1622	37.6328
ENSMUSG00000004070	Hmox2	66.1988	71.3701	69.9348	63.2188	59.3283	60.8165	67.5956	63.8676	59.7927	55.5928	54.0162	60.884	59.8065	59.8134	57.0751	56.6509	55.9669	51.1706	57.9291	59.4656	62.0909	59.4382	58.9346	58.2303	56.963	64.7068	60.223	91.2673	110.146	93.6054	89.0039	86.5489	91.6922	91.9357	80.1108	87.268	92.2524	91.8017	79.9259	90.6481	83.919	89.0937	89.7859	78.5417	86.9152	70.4688	69.8409	63.671
ENSMUSG00000004071	Cdip1	69.1796	72.5942	72.706	68.8951	69.8418	74.663	75.9791	70.0559	65.5043	65.2732	64.9575	67.7023	69.0062	66.8016	64.6045	70.0096	66.3592	63.7082	45.479	48.8474	51.2005	48.3527	50.9479	50.4558	47.4302	51.1245	51.0603	64.1577	57.9203	63.7731	59.6616	64.2647	62.9798	69.5679	60.8478	64.5948	64.9641	68.8016	62.8249	69.285	71.0622	66.7202	73.9999	69.9607	70.8233	77.7421	77.3115	76.863
ENSMUSG00000004085	Zak	4.01475	4.14519	4.18737	4.88499	4.48672	4.29824	4.71499	4.81338	5.5495	7.1	6.84559	5.79137	8.22141	7.37117	7.28572	14.421	11.8753	9.77774	9.03539	11.7086	10.0836	10.7762	11.9007	10.9347	16.9681	18.6457	16.5142	5.04209	4.08182	5.16997	7.60584	5.09022	4.63271	6.03025	5.54393	5.27062	6.81587	6.63822	5.25129	5.06235	5.84405	4.72159	6.35658	5.5828	5.20906	8.07109	7.81165	7.06631
ENSMUSG00000004096	Cwc15	156.717	189.918	178.823	175.334	189.185	175.407	158.413	189.39	214.702	153.9	138.311	154.238	160.097	153.335	168.922	155.488	146.027	162.928	144.963	144.185	148.511	142.265	156.395	157.429	150.154	151.629	157.825	190.314	258.793	217.934	215.25	216.717	232.082	198.148	218.744	206.163	160.819	158.046	142.167	169.967	150.101	166.481	165.617	145.824	161.016	166.75	163.093	150.602
ENSMUSG00000004098	Col5a3	0.0234143	0.0123423	0.0228596	0.022094	0.0403199	0.0151347	0.0379854	0.0281024	0.016238	0.027678	0.0209009	0.0137005	0.00701999	0.0432323	0.0170757	0.0269574	0.00848443	0.021391	0.00761478	0.0151508	0.0105731	0.0307801	0.0224947	0.032058	0.0286113	0.0114283	0.024445	0.0956386	0.0261368	0.0441227	0.636502	0.283216	0.261245	0.248492	0.247676	0.25093	0.314322	0.252086	0.261402	0.299914	0.227339	0.255681	0.207665	0.200928	0.142534	0.0193605	0.0179289	0.0217378
ENSMUSG00000004099	Dnmt1	115.016	128.643	109.433	107.997	113.383	103.753	113.099	113.883	96.3518	106.973	108.568	108.427	105.642	106.191	105.37	103.13	104.983	97.1147	76.866	89.0367	104.098	85.2368	98.937	101.756	79.4141	85.9031	101.461	134.761	80.3484	121.211	136.472	132.389	121.186	125.054	136.365	114.294	111.372	116.432	115.881	107.214	125.154	115.411	114.61	105.094	112.666	99.0069	104.415	98.5814
ENSMUSG00000004100	Ppan	66.1787	64.9426	61.9788	61.9849	64.9321	67.3252	78.6444	73.7317	62.3337	49.9928	44.4004	55.8791	58.5589	57.3176	59.1593	62.5486	61.0222	61.1772	67.2911	71.8199	72.6917	60.6944	63.9365	71.7304	73.1709	60.9315	80.3767	70.8879	99.8314	64.7123	82.7595	69.1111	61.651	69.158	67.2209	65.2519	41.4372	43.4757	37.4943	49.4168	43.5105	43.1057	49.9505	46.3407	50.617	52.1125	50.189	50.1784
ENSMUSG00000004105	Angptl2	21.566	21.3565	19.8608	29.1084	26.7413	30.6064	29.699	27.2507	23.4871	28.5978	28.3931	32.5035	28.2223	25.7309	26.7868	29.8201	29.7209	29.0334	23.8221	23.8498	24.2072	20.7633	21.4787	23.5534	23.2482	25.7831	24.9104	28.9599	23.0853	28.7155	32.3855	29.9835	30.8238	33.7026	32.3247	29.4157	40.7528	39.5547	32.6944	40.6364	41.04	38.2084	41.1448	36.6404	39.2664	21.7741	20.9606	19.5094
ENSMUSG00000004110	Cacna1e	0.188682	0.20135	0.155462	0.00699512	0.0259861	0.00762554	0.0635163	0.0387747	0.0588847	0.0262756	0.0229724	0.0172752	0.00989124	0.0123449	0.0274783	0.0620158	0.0307187	0.0361393	0.0556933	0.0351355	0.029848	0.0915917	0.129599	0.0765285	0.0758762	0.0630151	0.0941913	0.0703365	0.0641989	0.0568628	0.11436	0.111068	0.0818417	0.0160755	0.0728144	0.0686804	0.057496	0.0442775	0.0562043	0.0677348	0.0547178	0.0521366	0.277804	0.247559	0.235378	0.211269	0.219367	0.188755
ENSMUSG00000004113	Cacna1b	13.6198	13.0557	15.057	13.183	11.7144	12.6774	14.307	13.24	11.3118	15.7301	18.4251	18.1901	14.5529	14.5801	13.557	15.5342	13.412	13.2144	15.3866	15.2352	13.0773	17.4531	16.9114	16.9804	13.5384	15.5311	16.9881	1.86983	0.904539	0.980023	0.543506	0.302322	0.209913	0.304174	0.222669	0.0653108	0.758485	0.886674	0.714322	0.879706	0.905998	0.721426	0.39878	0.133841	0.175324	12.6723	12.409	13.2228
ENSMUSG00000004127	Trmt10a	16.8499	22.1647	19.6873	20.608	23.7446	22.1312	18.2824	23.5756	21.5199	18.7966	17.1801	17.1909	17.3385	17.7806	18.7594	16.0645	15.718	14.9206	17.0833	13.0738	14.5024	14.8504	13.4531	15.0082	15.4004	14.1728	12.9177	22.7041	18.435	26.1161	25.3775	22.2249	26.3483	20.997	24.0494	25.6259	12.9548	12.9922	13.5484	12.0831	12.3739	12.2479	13.241	13.4837	12.7858	16.3093	16.9893	14.4694
ENSMUSG00000004151	Etv1	8.98013	9.75343	9.23177	11.5269	9.90998	14.2494	3.63914	3.91441	4.01263	2.26416	1.58271	1.9461	5.95039	6.66562	7.00663	3.33331	3.70466	3.2571	1.9576	2.11047	2.01091	2.25015	2.04149	2.32609	1.66903	1.16942	1.54832	14.9663	9.39299	13.2709	14.4275	14.1124	16.6647	9.56328	9.80532	9.50515	13.6641	12.92	12.6407	8.60296	9.39998	8.84651	7.16632	6.94493	7.53883	6.25557	6.45953	5.67513
ENSMUSG00000004187	Kifc2	2.29661	2.17297	2.29963	2.2	2.55486	3.21121	1.86863	1.83093	1.51133	2.24055	2.29871	2.71026	2.80444	2.71292	2.88229	2.25406	2.43624	2.51381	4.53293	4.57543	4.69169	4.25819	4.46459	4.55238	4.78748	4.15551	5.18593	1.13691	0.96164	0.609794	0.502767	0.817223	0.597051	0.820813	0.740019	0.920402	2.37147	1.75986	1.53384	2.86168	2.2587	2.27479	2.43107	2.02383	1.97911	3.54879	3.69862	3.42879
ENSMUSG00000004207	Psap	159.397	150.724	156.268	178.49	179.21	186.938	199.916	184.075	161.87	253.83	242.642	269.052	225.004	223.409	214.262	232.985	230.904	221.872	222.681	233.156	252.239	211.12	227.805	238.184	212.863	236.31	241.989	108.421	103.727	103.519	108.096	99.1302	96.9816	107.961	106.983	101.867	149.2	148.768	117.147	138.99	134.426	124.47	151.244	124.29	125.563	208.882	205.412	197.193
ENSMUSG00000004221	Ikbkg	28.0233	23.8014	24.0333	24.3255	25.6926	26.7469	32.5782	25.4903	26.5881	23.853	22.9964	22.5587	25.2168	23.2848	24.1907	24.6957	21.5458	26.0638	20.8467	20.254	19.5837	19.7071	23.8289	21.3457	20.4694	22.9628	18.6772	19.6439	8.74631	16.3709	22.6378	19.124	15.8284	17.7575	19.3676	15.8571	17.0673	18.673	13.8815	18.608	19.8523	16.0814	18.4731	15.9003	17.3652	24.5182	25.2552	22.8101
ENSMUSG00000004231	Pax2	0.272301	0.250815	0.202845	0.324889	0.205697	0.342193	0.0699814	0.0953216	0.104077	0.0248465	0.0063869	0	0.0447834	0.0546102	0.0251975	0.024947	0.0273149	0.028081	0	0	0.0150471	0.00821233	0.0321827	0.0304134	0.0350693	0.00821703	0.0566888	0.0268754	0.0633468	0.0364615	0	0	0	0.0187497	0.0275252	0.056859	0.0166827	0.0172842	0.0161565	0.00876174	0	0.0347708	0.0114887	0.0428587	0.048473	0.146243	0.096974	0.131492
ENSMUSG00000004233	Wars2	5.48827	6.09959	6.36893	8.81972	9.62947	9.63336	10.2486	12.9547	11.5047	7.25131	7.43835	7.79343	7.35142	7.38573	7.15496	8.18731	8.40448	8.05249	6.44587	6.3429	6.40586	6.63191	7.08029	7.23986	7.54346	7.75875	7.09474	8.96972	6.74733	8.59834	8.07513	7.38293	6.63379	6.68519	6.43854	7.72169	8.02244	7.84768	7.45018	9.53011	9.08184	8.24968	8.2902	7.56896	7.88418	5.84735	5.33586	5.16584
ENSMUSG00000004263	Atn1	85.2295	86.9423	79.8923	68.6227	64.2852	83.6775	76.1308	64.1872	48.3307	61.7464	66.077	68.4493	64.4743	65.866	61.1167	58.0948	59.9441	52.9209	70.4536	75.0842	71.4297	75.3604	71.7226	70.2213	64.3587	59.3924	73.2702	69.4989	33.2108	51.9494	71.7477	60.0991	58.4106	74.6682	61.6539	61.2156	76.2455	72.3821	72.8944	73.8279	79.6929	71.9593	76.6109	69.5284	74.5962	92.1856	94.1289	92.1707
ENSMUSG00000004264	Phb2	385.619	328.341	335.508	302.26	301.95	274.01	346.046	291.484	277.782	249.18	264.338	312.813	282.445	288.919	278.35	271.953	239.094	268.898	320.451	292.312	324.086	321.622	306.49	292.539	289.107	303.312	301.69	328.531	421.696	370.793	427.107	365.868	336.969	342.85	299.361	333.143	256.396	304.367	258.812	300.681	300.021	305.768	294.75	279.934	310.369	305.067	310.129	305.065
ENSMUSG00000004266	Ptpn6	10.1638	8.96733	8.81599	7.41936	7.65234	6.81529	6.47584	4.82102	6.79219	6.66428	6.97683	5.82801	6.65596	6.80018	8.52131	7.26408	6.76111	6.54216	9.30114	9.70565	11.6339	8.84669	9.37573	9.66743	6.93555	11.0105	9.56238	4.0443	5.07515	3.96324	8.92551	7.1112	9.18076	5.85258	5.41785	5.91406	2.88367	2.80895	2.11598	3.85069	3.02837	3.37004	3.15779	3.60351	3.36815	13.455	14.1721	11.5042
ENSMUSG00000004267	Eno2	1.93435	1.57914	1.50679	0.380151	0.591857	0.292667	0.344781	0.0724351	0.041955	0.308549	0.386438	0.378227	0.291411	0.30745	0.245444	0.382479	0.193293	0.592666	0.546302	0.814729	0.681978	0.904737	0.651713	0.416266	0.591411	0.371346	0.823221	0.787114	0.271374	0.200575	1.17965	1.01863	0.922308	0.555085	0.381048	0.531671	2.58591	2.76748	1.84613	4.24845	2.52126	2.3443	1.89428	1.93675	2.22753	4.31453	4.46394	4.47044
ENSMUSG00000004268	Emg1	183.693	185.843	188.098	152.938	159.751	158.211	166.94	165.777	165.37	169.364	153.06	163.411	179.164	180.384	194.55	181.292	171.918	179.377	160.162	155.83	158.886	178.535	176.06	171.528	183	171.812	162.698	214.778	241.83	218.01	236.683	218.76	232.409	224.445	218.419	212.741	176.023	198.902	178.79	206.83	192.006	208.106	191.635	192.296	195.212	216.521	206.586	204.575
ENSMUSG00000004270	Lpcat3	50.3849	50.6745	48.4519	49.971	42.8429	47.2367	50.3099	44.7959	41.4981	27.583	28.1453	30.3532	31.2026	29.9708	29.5557	28.212	27.3354	26.8602	36.2454	32.0759	35.2603	33.5224	33.2808	33.4727	35.1202	36.1794	33.931	24.8833	17.9748	22.379	21.158	23.6706	22.9895	24.9817	24.3716	26.1136	29.4445	26.6721	21.8264	21.5081	20.8116	20.7954	22.633	20.7893	22.0577	41.2832	39.2768	42.6116
ENSMUSG00000004285	Atp6v1f	233.897	220.61	234.434	231.398	212.198	218.4	221.291	219.202	209.026	199.438	189.185	215.276	203.29	197.727	195.857	196.098	182.494	189.756	222.912	224.689	218.833	227.454	215.864	208.871	215.047	225.959	213.229	134.573	156.935	130.795	123.594	128.175	137.385	147.465	128.58	141.82	127.054	149.124	115.619	141.464	121.178	141.592	141.158	136.25	143.291	230.294	213.842	210.69
ENSMUSG00000004296	Il12b	0	0	0.0390402	0	0	0	0	0	0	0	0	0	0	0	0	0	0	0	0	0	0	0	0.013904	0	0	0	0	0	0	0	0	0	0	0	0	0	0	0	0	0	0	0	0.0142986	0	0	0.0282106	0	0
ENSMUSG00000004317	Clcn5	40.0521	39.6417	37.2482	23.3828	26.7763	26.1967	27.0832	28.0174	29.238	23.7271	26.1452	22.4916	17.8482	19.7466	20.6553	14.9166	16.8187	16.1778	14.4345	13.0656	13.6809	11.2635	11.0372	11.0313	9.47729	9.54774	9.5928	19.5919	12.4242	20.3458	28.1715	25.1694	24.1801	31.9385	36.7589	31.6761	24.1705	19.8204	19.0705	20.8541	27.8312	21.2817	37.7002	32.6309	27.8379	27.1819	30.8046	28.2563
ENSMUSG00000004319	Clcn3	19.9242	21.122	20.2504	18.6936	20.4887	19.6675	18.2812	19.1637	19.8167	20.4478	20.8868	19.1855	17.9369	17.9741	17.6588	18.6053	18.6813	17.7143	17.6725	18.7841	17.9118	15.9912	16.6905	16.5427	17.9566	17.5244	18.4144	8.64726	6.38845	9.30425	8.73821	8.37451	7.66331	7.5658	8.95177	8.0742	6.98127	6.31955	5.74862	7.17735	7.23255	6.07405	5.96295	5.7769	5.82098	23.4684	23.0356	22.7211
ENSMUSG00000004328	Hif3a	7.33842	6.87353	6.57311	6.11632	6.37541	6.78565	5.36177	5.00611	4.45216	6.70088	7.17626	5.96651	7.28888	6.8708	6.27311	7.17151	6.52011	6.22484	8.73961	11.3278	10.3331	8.44779	8.03688	8.55986	11.4545	12.6799	13.177	4.6919	3.49407	5.11286	3.95119	4.40946	4.58072	4.32427	4.43436	3.87892	11.4484	9.52433	8.74234	9.51792	10.8787	8.57393	8.27295	6.72661	6.9292	26.4613	25.5892	23.088
ENSMUSG00000004341	Gpx6	0.930591	0.577511	1.13183	3.92918	3.78079	3.20386	4.00177	2.94127	3.5644	1.16616	0.858608	1.26726	2.82644	3.71055	3.42605	1.75991	1.96361	2.4037	1.39059	1.35114	1.86508	2.76622	2.38422	2.74462	1.16615	1.09499	1.38462	0.049181	0	0	0	0.042889	0.146116	0	0.0257111	0.0223506	0	0.0714069	0.0664892	0.0241399	0.0226008	0.0238365	0.0226319	0.0235665	0.0661749	0.759066	0.717199	1.05818
ENSMUSG00000004344	Gpx5	0	0	0	0	0	0	0	0	0	0	0	0	0	0	0	0	0	0	0	0	0	0	0	0	0	0	0	0	0	0	0	0	0	0	0	0	0	0	0	0	0	0	0	0	0	0	0	0
ENSMUSG00000004347	Pde1c	2.0832	2.30603	2.06182	1.54267	1.54997	1.80525	1.21006	1.00923	1.37873	1.35925	1.21625	1.16603	1.19259	1.35786	1.20471	0.967491	0.843721	0.770637	1.00913	1.07138	1.03838	1.20315	1.10214	1.11443	0.681187	0.759499	0.710739	2.21752	1.37174	2.29233	0.457725	0.778943	0.50646	0.637403	0.481196	0.473716	3.47009	2.83752	2.51201	0.804263	0.80239	0.841365	0.718085	0.699573	0.691994	3.35879	3.09221	3.16025
ENSMUSG00000004356	Utp20	14.2931	15.7474	12.9787	13.4006	15.5998	12.2367	16.3212	16.6891	16.2175	14.9287	17.0124	15.288	14.6879	15.1872	15.0696	15.801	16.5519	15.5243	10.0691	12.3815	14.1155	9.65894	12.0052	13.1473	10.7226	11.3502	13.7935	17.6917	11.2486	16.5199	19.1053	18.4988	17.4556	16.3446	18.6461	15.2111	12.5315	12.48	13.0417	11.2204	15.6951	12.3446	14.5419	13.5357	13.2776	12.783	13.5674	13.0273
ENSMUSG00000004359	Spic	0	0	0	0	0	0	0	0	0	0	0	0	0	0	0	0	0.0556615	0	0	0	0	0	0	0	0	0	0	0	0	0	0	0	0	0	0	0	0.0616483	0.0316381	0.0529669	0	0.115432	0.0118813	0.0592688	0.0221925	0.0581215	0	0	0
ENSMUSG00000004360	9330159F19Rik	1.74976	1.8205	1.73777	0.380185	0.173747	0.228551	0.291973	0.276568	0.259339	0.39244	0.483215	0.361844	0.290239	0.251915	0.327251	0.269809	0.377956	0.318929	0.235113	0.286703	0.361672	0.193207	0.270977	0.307789	0.215693	0.197665	0.24738	0.343933	0.266482	0.354777	0.253954	0.405656	0.304177	0.479434	0.471974	0.520439	0.679595	0.584708	0.400653	0.793458	0.80288	0.843823	0.57963	0.543672	0.616893	3.45176	3.4399	3.01518
ENSMUSG00000004364	Cul3	117.335	134.581	134.573	123.862	129.452	123.364	108.436	131.953	139.984	138.947	124.638	120.225	121.198	125.369	129.83	128.791	125.156	136.124	132.286	131.022	127.212	124.108	129.13	131.102	122.818	137.27	137.111	153.022	176.82	157.509	130.998	147.444	154.289	141.761	154.451	156.649	145.74	128.557	129.923	131.087	129.76	124.21	126.815	121.609	125.357	142.294	133.156	131.164
ENSMUSG00000004366	Sst	5.39208	5.36532	5.08929	1.22395	1.42683	2.0216	0	0.0583639	0.229596	0.115868	0.0637724	0.0624167	0.962061	1.07643	0.437653	0	0.248506	0	0.988123	1.41693	0.92897	1.74317	0.567253	1.72905	0.167659	0	0.423023	0	0.0588513	0	4.78417	17.7444	2.17537	0.0641934	0.268511	0.276584	1.64239	0.970373	0.906664	1.83194	0.170243	0.0599159	1.39553	1.51558	1.50841	0.0554497	0.102509	0.102107
ENSMUSG00000004371	Il11	0.273449	0.233464	0.157507	0.347082	0.443774	0.359257	0.479378	0.239823	0.208108	0.131072	0.120941	0.318481	0.207966	0.193497	0.221751	0.143028	0.380959	0.0667735	0.191933	0.219075	0.23017	0.222841	0.0608337	0.174751	0.353404	0.302956	0.158729	0.0959315	0	0	0	0.221029	0.0314859	0	0	0.0284528	0.119623	0.155356	0.0621654	0.0312648	0	0.0619351	0.042761	0.0969054	0.11225	0.459217	0.316873	0.318041
ENSMUSG00000004383	Large	13.9789	15.4553	13.0365	13.074	13.64	12.6292	13.5093	12.8783	12.0436	13.1216	12.982	12.9369	13.5504	13.907	12.6684	13.7366	14.0787	13.2872	9.38834	10.2238	9.48615	8.86908	9.42985	9.85913	9.61105	10.0709	9.92483	16.5349	13.4085	16.0324	13.23	14.3727	13.2618	14.5626	14.0083	12.5223	23.619	23.6332	20.3093	22.9474	23.5512	21.1497	21.2097	20.2001	18.2261	17.3988	18.2259	16.029
ENSMUSG00000004393	Ddx56	49.9188	55.8437	51.6029	46.5172	48.0031	46.3772	58.684	54.4217	49.7351	49.3716	49.1672	50.5599	51.4389	52.391	52.2603	52.1544	51.0732	54.6141	37.3578	40.3606	43.3944	35.8396	40.2493	41.1082	39.6257	43.2951	42.7649	61.6676	62.5279	60.7762	64.533	67.5511	61.2485	59.0004	60.65	55.0784	51.01	53.9669	50.4286	52.0027	51.9095	54.3105	53.4437	50.6035	52.847	55.083	51.7245	51.1027
ENSMUSG00000004394	Tmed4	62.7715	63.1473	66.2192	61.8854	62.8893	63.9864	58.7684	60.5006	59.2582	64.0984	58.4706	63.3384	58.4008	58.3923	56.3208	59.3851	58.7364	56.9734	55.0757	54.2582	56.5769	49.6078	49.6595	52.5274	47.8402	51.8792	52.8713	50.6638	50.0989	50.5882	51.4552	48.1967	50.3091	49.4443	48.3815	46.3172	54.9069	56.1696	49.0968	53.2062	45.363	51.3128	51.8947	49.721	50.1926	72.6349	71.2229	69.6397
ENSMUSG00000004415	Col26a1	6.06887	6.73566	7.4608	5.8366	5.56106	7.00032	5.14297	4.32861	4.87694	3.37811	3.3795	2.46037	6.16736	6.18557	5.95842	8.54694	21.6967	20.259	5.28432	7.3242	7.18595	13.3149	10.631	9.45099	4.5701	3.21905	2.88215	182.075	162.734	168.495	203.107	177.852	173.807	144.332	146.854	129.425	298.972	321.123	285.563	447.394	401.822	447.891	277.068	264.779	265.882	19.9695	23.4939	13.9142
ENSMUSG00000004446	Bid	17.9884	18.3517	18.929	19.2007	18.8278	20.653	22.7125	22.2758	21.45	17.9943	16.8222	18.3479	20.5538	20.2995	21.0765	21.3687	20.6386	19.9159	18.7437	17.7117	17.165	17.0201	16.5524	16.9102	18.8482	19.4015	17.8997	11.7438	13.5203	12.2881	7.60644	7.68811	8.64823	9.45125	7.75262	8.39713	9.57901	10.2792	9.355	7.58166	5.98009	6.63779	10.3987	9.86024	10.4178	20.9643	20.012	19.7069
ENSMUSG00000004451	Ralb	33.647	30.1601	31.6694	33.5676	33.7479	33.1813	39.8575	37.252	36.1374	34.4028	31.852	34.9695	33.8883	33.0409	36.8971	37.0895	37.668	36.1909	33.6709	33.4619	29.9212	30.4003	28.5085	30.0239	33.3404	33.9878	32.6715	67.8058	75.4408	69.9837	80.5429	62.0805	65.2231	63.8791	58.4409	60.4698	72.4872	78.6352	69.4309	70.5201	61.598	69.7806	64.1545	62.4368	63.1031	34.9954	37.5051	32.3406
ENSMUSG00000004455	Ppp1cc	29.4625	23.0691	24.618	22.5834	22.4226	20.1179	23.0219	22.2332	22.6896	27.0823	33.2493	33.854	31.338	34.7734	32.7062	29.714	45.3847	34.6382	23.7356	31.7747	22.0341	24.2985	21.6267	29.081	28.1471	19.9799	32.6097	23.6	19.8737	22.1835	23.1043	21.1308	20.7139	25.9436	30.4236	23.7999	37.354	37.7426	30.8609	40.2045	40.2106	41.8571	37.2895	32.8244	35.3867	33.5847	33.7098	32.8761
ENSMUSG00000004460	Dnajb11	80.3939	77.4191	71.9026	66.8739	69.1295	63.8278	76.6507	76.7278	75.8646	66.7579	63.5362	67.483	63.4447	67.1406	65.367	59.5582	62.4613	59.5872	69.5133	72.8606	64.7851	68.444	68.9512	68.7225	64.1711	63.8447	61.1761	82.2669	97.756	80.3449	92.5056	79.3859	83.1815	81.7659	84.9278	75.8783	70.5012	75.0613	57.5143	64.0331	63.2003	59.2789	68.1616	62.4835	58.1217	74.6391	72.5595	62.8921
ENSMUSG00000004462	Tbccd1	17.3186	17.571	16.6109	14.1783	14.8352	16.1228	17.6242	14.7104	15.1288	14.7332	14.7608	14.6852	16.2215	14.7704	15.8253	15.7611	15.2746	14.5096	14.8165	14.5312	15.146	14.0602	15.2788	14.0529	14.6521	15.249	14.1379	19.8123	17.7901	18.0336	16.9942	18.4791	17.5143	17.1938	16.6049	18.0019	18.0115	18.115	16.1826	17.0043	17.2109	17.0169	16.7334	15.9757	15.5453	16.9049	16.6401	15.902
ENSMUSG00000004473	Clec11a	1.39452	1.13141	1.19289	0.970929	1.13464	1.17766	0.947155	0.702819	0.788779	0.893104	0.812905	1.09835	1.01488	0.874425	0.935385	0.906174	0.872288	0.8472	1.57171	1.47921	1.38847	1.30775	1.09978	1.1245	1.41545	1.29549	1.40202	0.379275	0.405243	0.414735	0.497976	0.455267	0.142216	0.388079	0.339965	0.453731	0.734152	0.734434	0.807092	0.639321	0.413383	0.792321	0.864282	0.617028	0.798564	1.49516	1.43157	1.7346
ENSMUSG00000004500	Zfp324	8.91536	8.5284	8.57811	7.51116	7.09963	7.53158	8.51838	7.95675	6.81907	6.7645	7.23314	6.82945	8.12545	8.01126	7.12359	8.41408	8.36419	6.70628	5.24779	6.23692	5.08661	6.07215	6.45083	5.98775	6.67281	7.81988	6.68867	8.71779	6.29977	9.99218	9.33758	9.43147	9.29932	10.0883	9.47678	9.73962	12.6964	13.3703	11.0473	12.4019	12.6272	11.5201	12.5717	11.5969	10.572	9.57123	9.37153	8.1925
ENSMUSG00000004508	Gab2	6.04294	6.71424	6.6164	4.01112	4.24328	4.22086	3.88605	3.88326	3.44961	3.92177	3.72242	3.96327	2.3339	2.3841	2.6621	2.63799	2.48017	2.32605	2.55655	2.42808	2.32546	2.26063	1.80624	1.6485	1.92947	1.85695	1.66472	6.6674	4.53857	6.78791	7.17487	7.09062	7.53271	9.34829	9.36553	9.23076	7.64674	6.44303	6.10625	6.36514	6.63876	6.35389	7.87768	6.74998	7.73199	6.65915	6.54789	6.01643
ENSMUSG00000004530	Coro1c	99.908	108.13	98.5133	90.8343	94.649	90.4943	92.9178	97.6107	88.7084	76.7878	68.1258	69.6207	85.6363	75.2749	84.2768	81.9885	84.341	74.3897	72.8258	71.9027	85.2952	72.1382	78.7321	79.4588	79.9448	80.046	82.6056	115.36	107.028	103.918	138.49	115.352	108.737	110.436	131.384	116.502	91.3873	93.6079	79.4359	90.1815	92.2589	83.9202	92.4243	88.9368	95.1472	83.27	88.6119	89.8052
ENSMUSG00000004535	Tax1bp1	83.0275	88.3613	87.1328	91.4074	95.5329	92.0747	85.4054	93.0678	102.712	102.131	97.954	99.7142	95.8789	97.5222	97.9537	97.0476	96.5786	99.1722	101.11	98.1155	96.6439	96.2232	96.4199	101.842	105.108	107.63	102.561	86.5796	86.0566	86.7375	88.4899	86.1418	90.1732	84.9519	91.7676	87.1753	89.1161	84.3375	72.869	88.4975	89.0368	86.0781	84.3722	73.4191	77.4247	89.7641	87.0995	79.6599
ENSMUSG00000004540	Psg17	0.0144636	0	0	0	0.0124667	0.0818215	0	0.0124678	0	0.0245889	0	0.0133313	0.021775	0.0537671	0.0265456	0	0.0131891	0.0418635	0	0.0233471	0.0108643	0.0236806	0	0	0.0125699	0	0	0	0	0	0	0	0	0.0688504	0.0272387	0	0.025083	0.0390909	0.0130651	0.0393209	0.0246104	0.0130575	0.0966678	0.0406604	0.0713423	0.0119968	0.0111008	0.0223926
ENSMUSG00000004542	Psg19	0	0	0	0	0	0	0	0	0	0.0177014	0	0	0	0.0193526	0.0132381	0	0.0189876	0	0	0	0	0	0	0	0	0	0	0	0	0	0	0	0.0392426	0	0	0	0	0	0	0	0	0.0187401	0.0173564	0	0	0	0	0
ENSMUSG00000004552	Ctse	0	0	0	0.0350752	0	0	0.034939	0	0	0	0	0	0.013157	0.0160712	0.0319465	0.0171647	0	0	0.012159	0	0.0396016	0	0	0	0	0	0.0165685	0.0402803	0	0	0	0.016143	0	0.0140653	0.016299	0	0.0876401	0.0914298	0.0284395	0.108471	0.0740627	0.0651295	0.0870535	0.0642648	0.0567643	0	0.0308057	0.0256774
ENSMUSG00000004558	Ndrg2	37.3826	35.5009	37.2634	29.5056	31.2528	33.4099	51.6488	54.4555	50.3457	64.968	70.0086	80.9087	30.2963	28.6666	28.4459	32.6815	32.2261	32.6184	40.216	37.7573	42.6016	37.6288	37.7481	40.2204	31.7742	37.5054	35.6054	1.9644	2.50758	2.20144	3.10577	2.5782	2.70663	2.88581	2.80067	3.16449	5.03078	4.58974	4.33401	7.00422	5.93862	6.49405	7.30675	6.12683	5.5932	43.0842	40.7544	38.4585
ENSMUSG00000004561	Mettl17	26.8194	26.5079	27.51	27.7242	27.8108	28.8943	32.6243	30.3696	27.2842	23.0354	22.7648	23.2558	25.3748	24.8417	25.9016	26.4918	25.1016	22.4841	24.9577	24.1647	29.3953	25.0738	26.2126	25.8832	31.2428	24.5917	27.6503	18.6599	17.6695	19.2106	18.3147	19.4729	18.7449	22.1636	19.9757	20.5809	17.4093	18.4297	15.5586	20.6714	19.2089	17.9544	19.6853	18.293	18.3459	21.3901	22.8728	24.0344
ENSMUSG00000004562	Arhgef40	43.0546	42.06	41.7162	33.5389	31.4099	40.3666	45.8168	43.3549	36.865	63.377	65.4536	71.73	45.1804	45.3838	41.9972	48.3072	52.7562	47.1689	50.6326	60.6704	63.7078	48.7869	53.1233	60.4446	61.2493	50.5823	70.3638	103.614	128.562	90.7287	117.774	96.851	89.419	106.388	90.9841	90.8574	119.19	123.816	109.189	121.2	119.731	108.125	128.477	108.195	127.465	40.9196	41.5625	40.7448
ENSMUSG00000004565	Pnpla6	12.1232	11.0811	10.0592	12.3363	13.3351	13.0858	15.6996	13.0191	11.104	14.26	13.9596	14.6126	14.1097	14.3377	14.2312	14.3125	14.6727	13.6304	11.1747	12.4063	12.9213	10.6517	11.7713	11.758	10.5835	11.0971	11.7913	5.5971	3.4599	5.74628	5.75129	4.77174	4.61887	6.52982	6.24339	5.75753	7.98507	7.902	6.36564	7.41356	7.78712	7.02421	8.1557	6.96631	7.18149	12.3161	12.1891	11.4832
ENSMUSG00000004567	Mcoln1	28.1766	27.9562	25.1385	27.5353	26.2236	28.8722	24.8134	24.9796	23.8733	22.7728	23.06	27.9087	21.8482	24.2263	24.6812	24.1149	24.4745	24.4227	30.2256	30.7198	33.209	27.6873	25.7969	32.2002	32.3665	23.6492	34.1335	26.3599	30.38	23.5746	28.4487	23.3793	23.666	23.6416	24.9438	23.2783	29.6622	31.289	26.7338	33.3376	29.376	29.9458	25.4849	21.5574	25.8467	23.8799	24.6842	24.2968
ENSMUSG00000004568	Arhgef18	16.9731	15.0132	15.7997	15.4149	15.1083	15.9923	16.9652	16.9565	14.6494	23.0806	23.4338	24.5566	18.949	18.8864	18.3686	20.8632	19.7598	18.8088	19.1508	20.6288	21.127	17.0222	19.0398	19.7936	16.781	18.3433	19.2356	9.24872	6.57421	9.31485	12.0239	9.41804	8.26212	9.73866	10.0773	9.40378	13.1289	11.9467	10.7417	12.1325	12.541	11.8539	13.0607	11.3933	12.4868	17.0911	16.2722	15.8837
ENSMUSG00000004591	Pkn2	57.6067	65.8033	60.7302	50.6214	52.2196	49.834	54.7013	56.7433	61.2741	46.4505	42.6294	44.2439	45.1328	46.8477	48.0167	48.0724	47.0081	47.6748	37.9331	35.8481	34.5621	38.0752	37.1516	36.1289	39.6969	38.7713	38.7421	61.0926	41.958	63.619	51.2779	59.1768	65.6627	63.0425	64.9532	62.5669	43.8644	39.9271	38.9447	45.5269	45.2245	44.8268	45.3315	44.1629	46.826	53.6517	52.2654	50.0591
ENSMUSG00000004609	Cd33	0.0601795	0.0499023	0.111103	0.0850387	0.0933392	0.097266	0.0279513	0.02072	0.062654	0.153213	0.124645	0.0332342	0.135764	0.044668	0.121301	0.0794338	0.109579	0.0347829	0.165798	0.126356	0.189957	0.0690337	0.0672839	0.0926014	0.0628281	0.107448	0.0898407	0.738888	0.936085	0.659227	1.17773	0.786665	0.795224	0.492178	0.417821	0.885257	0.740496	0.53076	0.445418	0.57744	0.552607	0.597393	0.532558	0.563632	0.442835	0.189543	0.175395	0.149059
ENSMUSG00000004610	Etfb	102.392	95.0994	103.945	91.0109	94.1599	92.2505	114.311	98.6564	87.7367	131.57	120.922	140.124	146.512	142.061	145.352	144.006	133.828	146.609	113.33	120.324	120.001	125.745	123.92	126.317	125.213	133.34	119.207	113.765	171.236	123.657	125.642	107.003	114.073	122.749	122.843	117.148	153.779	174.845	136.334	163.913	141.439	162.805	168.76	148.181	164.068	137.333	136.509	126.59
ENSMUSG00000004612	Nkg7	0	0	0	0	0	0.0336326	0	0	0	0	0	0	0.0314581	0	0	0	0	0	0	0	0	0.0675693	0	0	0	0.0338584	0	0	0	0	0	0	0	0.0790973	0.159787	0.0341488	0.0352845	0.182215	0.169119	0.147879	0.0690436	0.109087	0.0691617	0.108085	0.167654	0	0	0
ENSMUSG00000004613	Lim2	0.0807963	0	0.0934435	0.32252	0.173139	0.537355	0.293056	0.512098	0.0723037	0.140113	0.193137	0.194074	0.240037	0.308477	0.6422	0.628779	0.617801	0.712778	0.400213	0.939729	0.731397	0.594762	0.125481	0.284623	0.406	0.320296	0.233504	0	0	0	0	0	0	0	0	0	0	0	0	0	0	0	0	0	0	0	0	0
ENSMUSG00000004626	Stxbp2	95.3742	87.644	87.0034	89.2269	101.091	105.868	109.765	96.0318	91.0398	79.9074	77.0922	92.0321	77.1292	73.9976	84.184	79.5365	79.9897	79.6185	91.4847	91.3298	91.9128	83.1865	89.5325	90.7422	90.6681	84.0071	96.7502	10.7292	14.944	11.3029	10.0419	11.328	9.72452	8.55094	10.7098	11.303	13.517	10.5382	9.06317	15.0512	13.8266	14.7583	10.771	7.96168	9.77568	79.0808	75.9966	74.0066
ENSMUSG00000004630	Pcp2	1.08718	1.30831	1.34398	0.0728619	0.147544	0.0765437	0	0	0.0679019	0	0	0	0	0.0408983	0	0.166777	0	0.191898	0	0	0	0	0	0	0	0	0	0.852801	1.44014	0.357632	1.48384	1.72185	2.31081	1.67705	1.31695	1.10729	0.75646	1.68221	1.41991	4.83023	3.37867	3.57913	4.63763	4.15626	4.80428	0.338562	0.775476	0.33093
ENSMUSG00000004631	Sgce	24.0047	26.5152	27.1085	32.7275	31.2305	34.389	36.9469	38.1056	38.5092	25.698	24.4104	25.5886	24.2386	23.7323	26.2042	27.739	29.6126	29.4035	23.2991	22.0822	21.2119	20.9435	20.1859	20.8524	22.0075	24.2836	22.0254	22.2303	23.5205	23.4711	18.4893	18.4199	21.5739	25.0828	21.1867	20.1497	31.7747	31.8479	27.5997	34.7698	27.4503	32.9711	31.6578	27.6329	26.4366	24.1878	23.8902	22.0141
ENSMUSG00000004633	Chn2	18.1738	20.6241	22.1364	18.2171	20.82	20.1554	18.9086	18.4795	20.4654	13.1014	11.9974	14.1297	11.5144	10.4729	12.0205	13.7948	12.5477	11.3446	10.3472	8.56336	9.51991	6.81034	7.00806	5.71568	6.58633	8.10631	6.76337	5.30498	7.17585	5.10478	4.7991	9.42517	7.73943	6.94906	7.92241	7.01465	8.34301	7.88228	7.5278	8.41757	7.54072	7.77299	7.24718	6.6369	6.56801	27.2687	26.2406	24.6687
ENSMUSG00000004637	Wwox	6.66775	6.96483	7.25222	7.47405	7.32464	7.01138	6.60282	7.29664	5.61284	7.82586	7.47146	7.78158	8.07832	8.55881	7.94857	8.24344	8.56435	7.72903	9.93594	10.4185	11.292	9.39678	9.74243	10.1776	8.97383	10.9882	10.5378	4.79256	4.73327	4.7378	5.12373	4.54594	4.5812	4.54948	5.13516	4.38904	6.97633	6.53099	5.23	6.17113	5.35196	5.33133	5.8839	5.04264	6.22412	9.06038	8.39563	8.21678
ENSMUSG00000004642	Slbp	126.197	132.26	144.567	125.765	120.887	120.76	114.51	118.482	135.619	109.01	112.636	115.567	122.096	112.886	125.826	118.569	120.462	109.007	113.024	115.989	114.631	126.847	119.27	131.13	117.64	118.711	121.396	162.489	185.729	169.867	153.421	169.756	183.367	150.194	164.352	182.786	142.893	148.587	142.751	156.844	149.539	166.324	153.308	143.172	165.559	131.086	125.13	128.892
ENSMUSG00000004651	Tyr	0	0	0	0	0	0	0	0	0	0.767699	0.242243	0.122501	0.0200231	0.0329165	0.00812571	0	0	0	6.95273	6.03334	6.8643	0.823919	1.01613	0.836147	0.0154871	0.216619	0.166009	0	0	0	0	0	0	0.00843938	0.00829945	0	0.176726	0.135785	0.128221	0	0	0	0	0	0	0	0	0
ENSMUSG00000004654	Ghrhr	0.019968	0	0	0	0	0	0	0	0	0	0	0	0	0	0	0	0	0	0	0	0	0	0	0	0	0	0	0	0	0	0	0	0	0	0	0	0.0172204	0	0	0	0	0.0178795	0	0	0	0.066929	0.0614384	0.0899785
ENSMUSG00000004655	Aqp1	0.208512	0.163887	0.214797	0.167539	0.15315	0.173207	0.27772	0.258014	0.155075	0.187617	0.120154	0.229925	0.418063	0.488371	0.485271	0.623374	0.466863	0.524529	0.697408	0.696907	0.76116	0.430065	0.430936	0.56323	0.646879	0.616191	0.685918	1.5264	1.29176	1.59665	1.7828	0.728059	0.650417	0.469338	0.4821	0.552581	20.8534	20.1899	18.0466	3.03923	2.63774	2.34052	2.49319	1.83872	1.58736	1.17148	1.3511	0.896238
ENSMUSG00000004661	Arid3b	110.544	114.14	107.618	118.94	119.237	128.215	128.412	120.171	103.416	57.203	57.5451	62.6297	55.3866	59.1294	63.2813	50.3581	52.8486	52.5716	27.2374	25.4657	28.5449	27.7293	25.6647	27.7858	24.4829	21.05	23.3584	26.5038	17.3114	23.9403	25.995	27.9939	25.235	31.3085	30.2686	28.2415	11.338	12.9721	12.1364	11.8908	11.8816	12.0899	11.6166	12.4521	13.9215	39.4378	40.379	43.0452
ENSMUSG00000004665	Cnn2	52.4381	46.4756	49.0245	92.0424	98.1364	88.0614	165.305	140.412	128.77	83.3192	75.1114	103.785	87.7792	81.0525	90.495	106.089	99.5864	108.052	77.0884	85.3575	87.2025	88.2841	96.4709	94.3267	104.477	100.25	105.719	278.678	289.271	268.959	143.883	136.531	138.587	157.941	149.046	139.599	219.329	214.606	192.66	226.18	172.302	189.335	201.212	154.761	181.259	37.4746	40.696	37.3683
ENSMUSG00000004667	Polr2e	215.152	189.694	196.405	181.212	186.514	191.005	230.353	200.145	171.399	166.583	144.188	167.622	169.049	174.965	165.019	171.065	160.642	167.561	160.633	166.442	168.383	163.429	165.451	174.105	168.626	163.913	170.042	216.356	246.121	200.29	256.54	208.104	203.164	212.677	212.11	190.828	149.607	174.904	156.817	170.307	147.167	167.705	163.829	165.098	161.376	157.808	155.846	158.381
ENSMUSG00000004668	Abca13	0.290781	0.364911	0.27765	0.163292	0.20639	0.187883	0.169291	0.159408	0.21591	0.28458	0.392736	0.341099	0.438464	0.42484	0.499869	0.311124	0.37728	0.34517	0.232385	0.195962	0.215476	0.275551	0.279176	0.308318	0.199724	0.159425	0.232563	0.0263692	0.0318584	0.0486216	0.032903	0.0534185	0.0348499	0.017218	0.0200631	0.0474063	0.0952274	0.0691146	0.0716411	0.0273551	0.0544867	0.0335988	0.0469561	0.0747764	0.0402288	0.529455	0.596574	0.475212
ENSMUSG00000004677	Myo9b	24.7322	24.2786	22.8671	23.6219	25.0773	24.8184	27.9722	26.2378	21.6925	27.4996	28.5987	28.4233	28.6954	29.798	27.8456	28.7064	29.1727	26.9848	23.2716	25.2228	24.3758	22.7584	24.1089	23.3159	23.3274	23.1086	23.7246	18.4183	11.3881	17.4922	22.023	18.587	17.3658	20.9337	20.7679	19.1502	22.9508	22.7983	19.9935	22.4082	24.279	21.3664	25.7493	22.1539	23.485	25.555	25.8585	23.6158
ENSMUSG00000004698	Hdac9	3.30339	3.46775	3.47506	1.02005	0.835224	1.01683	0.767526	0.804364	0.835395	1.75658	1.77791	1.68402	1.35703	1.06633	1.12472	1.0573	0.921453	0.868395	1.10743	1.11814	1.17359	1.0117	1.05931	1.02051	0.691648	0.799296	0.618619	2.1489	1.74166	2.2986	0.714094	1.02023	0.909568	1.10651	0.792841	0.87587	5.12132	4.08333	4.44045	2.17764	2.13104	1.99126	2.16858	2.09271	2.12411	4.566	4.326	4.615
ENSMUSG00000004707	Ly9	0	0	0	0	0	0.0116975	0	0	0	0.0123032	0.0272928	0	0.0211655	0	0.026573	0.0119555	0	0	0.0234334	0.0116816	0.0148397	0	0.0315047	0.012368	0	0	0.0368245	0.02695	0	0.0273596	0	0.0233688	0.0393865	0.0275683	0.040897	0.0163849	0.0863642	0.091307	0.0653933	0.102091	0.0618918	0.039209	0.0731967	0.101715	0.0714159	0.0164318	0.0333366	0.015314
ENSMUSG00000004709	Cd244	0	0	0	0	0	0.0204294	0	0	0	0.0211177	0	0	0	0	0	0.0211156	0	0.0106523	0	0	0.0189581	0	0	0	0	0.00934007	0	0.0902115	0	0	0	0.0196968	0	0	0.0237029	0	0.0637675	0.0439781	0	0.0356514	0.0187222	0	0.0628529	0.0442037	0.0202646	0.00924245	0.0189362	0
ENSMUSG00000004730	Emr1	0.0481521	0.0461665	0.0571899	0.116125	0.0424295	0.00799794	0.0221638	0.0257114	0	0.488929	0.243983	0.145482	0.255483	0.171218	0.240756	0.353631	0.277031	0.174518	0.332976	0.251852	0.236102	0.0975815	0.0776516	0.068127	0.0917453	0.11725	0.112242	0.762696	0.751312	0.866447	1.16434	1.32668	1.42945	0.722098	0.497076	0.634446	1.84015	1.44637	1.14472	1.38308	1.40868	1.02368	2.08371	1.42651	1.33929	0.74173	0.624269	0.528166
ENSMUSG00000004748	Mtfp1	9.32795	8.54301	8.90165	4.19964	4.63369	4.60759	4.61895	3.74603	3.6011	2.677	2.19735	2.58695	2.80839	2.63189	3.05618	2.09095	2.52042	2.27217	1.70794	2.79837	2.40787	1.82057	2.026	2.15386	2.16584	2.16854	2.34751	11.7259	13.8829	10.4795	8.50094	9.15212	9.97271	9.79833	9.77631	9.22554	5.74082	6.43784	6.04086	5.99533	5.34088	5.56844	5.79328	6.40067	5.48408	5.4418	5.94574	4.90852
ENSMUSG00000004768	Rab23	24.8158	26.1324	26.1909	26.5112	25.3824	25.2491	25.495	27.5807	28.3271	23.3439	24.6536	23.9929	25.5987	26.0108	24.6484	26.788	27.1236	25.1202	23.2221	24.5389	23.7102	23.3652	23.745	22.2813	24.4637	26.7851	24.6976	29.4692	27.0836	27.6178	34.8386	32.9567	32.0214	29.8925	30.5271	30.789	36.0787	34.487	28.2707	30.5246	33.7803	29.6834	32.1202	26.3319	28.4804	24.987	23.8643	21.5307
ENSMUSG00000004771	Rab11a	197.546	205.01	215.196	200.947	202.059	219.311	190.065	162.696	228.724	168.061	175.287	168.971	160.975	169.198	166.123	185.977	178.601	165.594	219.767	218.946	224.136	227.753	213.252	187.092	208.452	221.266	214.59	210.111	258.648	233.346	189.657	205.155	193.798	168.124	177.586	195.085	175.973	168.186	173.565	171.158	168.799	170.583	162.881	152.94	165.342	201.198	183.627	193.493
ENSMUSG00000004788	Eif2b2	148.291	109.196	117.486	114.935	121.498	114.415	141.858	114.757	101.784	83.9077	79.6002	100.78	88.5733	81.0343	90.1338	77.7301	88.9011	92.2828	101.856	121.261	108.85	105.724	119.247	123.721	121.771	111.747	119.379	124.625	132.526	100.469	146.38	105.301	110.459	117.695	159.574	129.236	73.4773	88.1434	76.6978	75.8184	78.2377	76.1577	83.025	71.0231	82.3736	92.7585	95.8281	91.7764
ENSMUSG00000004789	Dlst	86.4368	92.7209	87.0708	85.5677	90.4227	84.9808	95.9115	91.2313	89.029	91.6105	87.8956	96.0285	95.2408	90.9633	92.576	97.0295	94.4392	90.9263	89.9212	94.3025	96.8256	95.126	94.2494	97.9549	100.382	97.7227	95.2482	107.449	103.348	108.954	107.637	111.462	108.247	114.217	118.672	112.795	109.498	105.024	98.5544	118.68	108.731	112.08	115.385	99.8372	114.098	88.0876	84.7422	82.3289
ENSMUSG00000004791	Pgf	2.61247	1.98979	2.08451	2.77619	3.31182	2.87934	1.91186	1.86516	2.88724	1.1313	0.842003	0.969749	1.41862	1.18145	1.56761	1.4742	1.2498	1.26444	1.86966	2.15391	1.73751	2.70035	3.35766	2.95734	1.51008	1.26568	1.73199	1.97368	1.65919	1.62972	4.47262	1.72573	1.91038	4.06157	3.75753	5.18144	2.89149	2.91334	2.48949	3.50614	3.20393	2.37864	7.4197	7.51151	6.66844	9.94859	8.27647	8.13773
ENSMUSG00000004798	Ulk2	17.8191	18.8178	17.3461	15.0456	15.4756	16.4223	13.0432	14.9609	14.2089	17.6907	17.4193	16.9337	16.2602	17.0436	15.2214	16.9348	16.4386	15.3204	14.8124	13.6082	12.922	13.2781	14.4295	12.4062	13.686	14.7793	12.3605	20.8415	13.6969	21.0606	20.3856	22.4145	21.8607	20.9854	20.2767	19.9452	32.6581	31.4911	28.0842	30.4262	30.6921	26.7864	24.9285	24.9242	24.7193	23.974	21.5182	20.9106
ENSMUSG00000004814	Ccl24	0.0250005	0	0	0	0	0	0	0	0	0	0	0	0	0	0.0231078	0	0.045924	0.0242795	0.0201382	0.0603931	0.056219	0.0407725	0	0	0	0.020204	0	0.256656	0.0229554	0.379198	0.396683	0.100965	0.274329	0.454545	0.287071	0.145238	0.109017	0.203679	0.203974	0.182149	0.23465	0.0452257	0.335275	0.282535	0.205381	0	0.0192485	0
ENSMUSG00000004815	Dgkq	10.0698	10.2751	9.57353	8.90722	10.2621	10.215	11.669	12.2867	10.4082	11.4618	10.8049	12.4865	13.1667	12.6181	11.6662	13.5296	11.7027	13.8493	14.9543	14.6043	14.807	13.6405	14.4806	13.2411	19.7872	15.9707	15.2002	11.4344	5.88988	10.3571	11.9876	10.6077	10.1444	10.3595	8.88368	11.2115	14.9882	14.718	13.8078	15.9855	14.2863	11.9134	12.7225	12.9228	11.6348	11.2838	11.0986	10.6462
ENSMUSG00000004821	Tmed11	0	0	0	0	0	0	0	0	0	0	0	0	0	0	0	0	0	0	0	0	0	0	0	0	0	0	0	0	0	0	0	0	0	0	0	0	0	0	0	0	0	0	0	0	0	0	0	0
ENSMUSG00000004837	Grap	0.0573237	0.0159324	0.014755	0.153274	0.016859	0.0635036	0	0.0341908	0.0341305	0.114522	0.0723321	0.0181372	0.0147203	0.0899416	0.0178798	0.0163736	0.0180003	0	0.50957	0.223188	0.354001	0.160792	0.110304	0.0843756	0.0171565	0.0643855	0	4.11004	3.41022	4.34458	5.96716	4.2361	4.40284	4.18019	3.59994	3.04508	4.92479	5.38736	4.0232	5.77417	5.13808	4.37929	5.38766	5.03414	5.69396	0.272123	0.323274	0.20091
ENSMUSG00000004842	Pou1f1	0	0	0	0.0142661	0	0	0	0	0	0	0	0	0	0	0	0	0	0	0	0	0	0	0	0	0	0	0	0	0	0	0	0	0	0	0.0339405	0	0	0.0302156	0	0	0	0.0159135	0	0	0	0	0	0
ENSMUSG00000004843	Chmp2b	72.5825	77.0094	81.0085	90.3076	90.3846	83.6944	70.8505	76.9827	90.562	129.732	124.639	128.101	114.63	115.093	117.524	107.076	104.534	124.158	104.037	99.585	90.2975	102.644	95.9713	101.864	97.8023	97.7927	87.7568	43.222	60.2279	48.1479	41.7649	45.261	50.6339	45.6082	47.0505	45.3841	71.9548	65.4724	63.7533	81.3229	71.069	76.9098	67.2881	59.4341	63.431	107.806	101.626	104.7
ENSMUSG00000004846	Plod3	32.6348	30.234	28.428	30.4342	33.0314	33.2197	39.5482	32.4108	34.1294	25.4102	25.9325	31.7135	29.2402	29.6493	29.5817	31.5776	32.3939	28.3082	31.2886	32.044	36.4085	28.6482	32.4648	34.5489	35.3515	31.7251	36.5845	33.6355	24.4398	28.3296	29.5097	30.8886	27.2811	30.5815	31.1745	30.9848	37.2301	36.057	29.8064	41.4297	34.555	34.3445	36.5897	30.6653	32.1501	30.8665	31.6626	28.6038
ENSMUSG00000004849	Ap1s1	165.711	149.659	147.758	132.515	128.067	130.228	160.904	141.755	136.529	145.101	130.969	141.37	152.282	152.126	147.115	149.746	132.403	139.164	136.174	134.073	135.155	139.962	142.873	141.571	134.415	135.486	135.367	175.902	172.368	184.795	180.549	184.194	186.433	168.328	166.539	161.271	150.897	171.757	163.638	163.526	140.743	168.397	153.598	153.099	155.322	156.085	147.054	147.794
ENSMUSG00000004864	Mapk13	73.0623	73.8922	70.2482	49.6397	55.1412	49.2515	40.9934	36.8119	34.9952	42.067	39.1866	44.5328	51.0614	50.4259	47.6635	45.2484	42.5541	43.3191	48.8925	53.445	57.9315	53.8622	58.2563	60.2808	59.1053	58.4917	63.7562	1.30611	2.19651	1.42774	0.398783	1.22457	0.884892	0.475624	0.337096	0.156887	1.96666	2.19046	2.12533	0.945324	0.713936	0.753199	1.49626	1.1057	1.28682	63.9455	63.7247	61.3585
ENSMUSG00000004865	Srpk1	93.4121	104.715	91.3767	92.7449	97.0175	97.3916	102.018	103.768	109.747	73.4385	69.3323	69.7092	71.6663	77.9469	74.7765	74.3246	72.5364	74.0182	68.875	63.2517	64.4771	66.7133	61.9589	61.7413	71.6247	62.4391	62.6143	97.9764	79.6146	99.7816	119.391	105.844	116.388	108.667	120.661	111.548	70.376	69.5716	66.4577	72.7306	70.9466	69.0945	74.4083	72.0183	75.785	78.2434	70.9266	65.5546
ENSMUSG00000004872	Pax3	36.5374	40.3103	37.0073	0.165609	0.264253	0.264964	0.113802	0.255557	0.199827	12.4043	13.9038	10.6116	0.26683	0.27382	0.172369	0.593026	2.4605	2.4717	17.207	17.1089	21.0345	1.15201	1.2172	0.933222	0.20986	0.194796	0.116397	44.992	45.8797	46.9884	16.0685	13.9876	15.3769	2.08006	1.91525	1.96455	74.3947	67.539	66.3178	58.623	56.8559	60.9475	19.4221	16.9103	18.5247	25.0919	27.6397	29.5742
ENSMUSG00000004880	Lbr	56.5892	63.2397	59.0204	53.9687	54.5161	55.1676	58.3386	58.1676	61.6861	61.9381	61.3513	61.5617	61.5754	63.5846	59.7571	59.2633	61.5539	60.1071	42.6723	42.4496	48.0948	46.491	50.1465	49.6315	40.8078	41.463	42.7663	53.4166	51.0208	59.5458	43.2071	54.3779	45.0795	46.8727	50.2222	49.7242	57.4337	55.2543	52.3497	56.2719	52.369	52.6106	56.9708	56.271	52.4108	64.5245	63.5012	64.2208
ENSMUSG00000004885	Crabp2	1374.13	1435.47	1405.03	332.736	345.01	337.326	184.059	165.415	187.204	142.082	129.45	152.079	108.145	111.579	137.451	76.0873	76.8435	80.7916	96.4369	99.0061	95.7683	80.8401	72.1083	76.7617	101.431	97.592	97.1776	1541.52	1935.15	1655.36	1506.02	1364.31	1516.51	1063.09	1134.06	1092.61	678.597	797.941	719.989	671.106	620.25	727.953	606.303	546.614	646.585	1237.76	1197.75	1129.09
ENSMUSG00000004891	Nes	46.6131	45.7917	40.589	25.927	27.9535	22.4662	20.656	18.4797	17.4182	16.1173	17.7268	18.604	21.3848	20.8999	21.6425	14.4089	15.2932	14.7947	18.8466	19.8687	21.6485	20.3329	22.2733	22.4191	19.4411	17.7331	19.493	64.3109	58.6192	61.8483	40.8268	32.8827	29.129	26.055	31.2128	25.5478	35.1459	34.4488	33.21	26.8592	32.6722	27.8497	34.3037	27.0635	29.0431	42.9997	44.7959	38.7435
ENSMUSG00000004892	Bcan	0.388128	0.0801387	0.139335	0.0221178	0	0	0.0108911	0	0	0.00795051	0	0	0	0.00869274	0.142261	0	0	0	0.0249239	0.123648	0	0	0.00750232	0.0160526	0.00817527	0	0	0.17522	0.114233	0.0203163	0.0262005	0.179311	0.214506	0.0204947	0.147205	0.0355687	0.056562	0.0688583	0.0654335	0.0448601	0.0104927	0.0472517	0.0206103	0	0.0154374	0.236788	0.141319	0.166064
ENSMUSG00000004894	Hapln2	0	0	0	0.0142112	0.0480178	0.0146513	0.0210883	0.0657516	0	0.0154482	0.0342463	0.0771677	0.0273359	0.0506692	0.0535575	0.0318735	0	0	0.0104256	0.031188	0.00967151	0.0296401	0	0	0.112163	0	0.03377	0.0359238	0	0.0364726	0	0	0	0.012245	0	0	0.0603561	0.0231757	0.0327915	0.0496806	0.0980742	0.0828717	0.0641353	0	0.0105827	0.094525	0.0448753	0.0140359
ENSMUSG00000004895	Prcc	110.125	107.75	106.353	92.8979	93.0126	100.365	101.387	92.185	84.5687	79.0088	73.7321	81.6171	85.0648	85.1715	84.3001	86.1703	85.1938	78.996	77.3854	79.8883	85.2202	80.0818	83.4848	85.2252	77.936	86.3791	86.488	103.841	100.261	92.0185	107.304	94.2577	94.9386	104.542	102.99	97.6362	87.7109	99.1734	87.4383	97.5012	86.2182	92.4434	89.0533	88.0351	90.973	100.574	98.3263	96.2152
ENSMUSG00000004896	Rrnad1	16.4491	13.3243	14.0665	14.2714	13.7772	15.2344	17.1423	15.8044	15.4943	15.0647	12.7596	13.1153	16.6898	16.2596	15.8146	17.8623	17.0588	14.4046	16.1115	15.8997	16.9992	14.9657	15.6376	16.0127	20.2481	17.1365	19.2162	13.3371	13.3965	12.7127	17.6017	14.8419	13.5361	12.5896	11.8698	14.5505	16.4903	19.9665	16.038	17.724	17.6004	15.5413	15.8542	16.1928	15.7365	16.2847	15.4977	15.4733
ENSMUSG00000004897	Hdgf	677.601	708.058	724.536	607.662	616.754	613.272	583.69	594.878	583.062	518.784	496.279	543.353	537.572	523.547	557.869	509.711	484.523	493.949	580.246	553.262	553.823	587.081	604.259	605.211	549.169	579.396	561.583	506.688	550.436	525.899	548.693	502.086	550.847	538.055	515.434	531.793	337.163	371.705	310.326	343.536	340.838	355.162	327.791	312.66	357.605	648.961	638.584	627.762
ENSMUSG00000004902	Slc25a18	0.0715254	0.0796142	0.110425	0.152836	0.168396	0.11887	0	0.0641619	0.0426051	0.0204706	0.0226146	0	0.0184051	0.0450269	0.0447641	0.0818844	0.0675959	0.0231382	0.118965	0.0794909	0.110327	0.0400574	0	0.0210427	0	0.0200551	0.0461366	0.110177	0.197815	0.134576	0	0.269164	0.261501	0.138775	0.0459225	0.0400509	0.0412096	0.0213174	0.0794477	0.0648557	0.141755	0.0854536	0.121663	0.126674	0.138485	0.0600067	0.07344	0.143234
ENSMUSG00000004929	Thop1	98.0262	88.3411	92.5592	80.8158	80.3588	73.0431	93.0553	85.2073	74.8915	56.1438	53.7735	61.7477	63.5184	67.2309	63.7892	61.6356	62.4502	58.7001	58.7238	56.1741	56.0855	63.7469	61.322	65.3285	63.8288	62.2718	60.8443	100.922	79.6699	94.9576	119.591	103.16	92.2479	101.889	96.9336	91.6887	61.5753	69.8125	61.0234	71.8406	68.5434	74.9491	70.9377	63.7104	72.055	81.6281	75.6524	72.4804
ENSMUSG00000004931	Apba3	26.6425	22.7291	24.0569	22.668	22.4548	25.2988	27.236	24.1063	18.9384	23.6698	22.0482	25.7137	26.2434	26.5298	27.5864	26.0969	26.2259	22.9041	22.6152	25.8227	20.9016	24.6495	23.0719	23.0749	25.0902	23.603	25.6407	18.2604	12.4425	16.6911	21.7132	19.3735	19.604	20.9486	20.5348	17.77	23.0244	25.9517	21.2708	26.9116	22.996	23.9116	25.604	24.0516	23.6972	28.8733	29.445	27.3926
ENSMUSG00000004933	Matk	4.67608	3.55289	3.57008	3.06779	2.85577	3.28057	2.45949	1.34875	1.42634	2.70907	2.22493	3.37026	2.37784	2.48909	2.52509	1.73153	1.67488	1.78534	1.9859	2.15684	2.3461	2.02449	2.16462	2.2508	2.31091	1.95182	2.92748	0.57694	0.600662	0.454321	1.052	0.494944	0.287063	0.343948	0.417692	0.261605	1.43539	0.868015	0.707966	1.06409	1.0209	0.686004	1.29325	1.07953	1.10799	4.6263	4.80959	4.88052
ENSMUSG00000004934	Pias4	41.5662	44.0358	39.9982	40.1397	37.7328	42.7154	50.7149	41.5073	33.7414	34.7685	32.7423	37.9725	34.27	37.7682	35.1309	34.5094	37.381	33.6487	28.8319	30.9026	32.1499	29.8563	29.1258	31.9653	29.9217	28.444	34.9524	44.018	21.9041	42.7473	34.3415	40.006	39.3378	43.9223	37.7986	35.5964	34.4845	38.2472	37.2564	42.0161	37.2887	37.8168	40.6955	38.1008	36.6286	39.4006	37.6619	35.3945
ENSMUSG00000004936	Map2k1	49.8033	48.9582	50.3881	39.3433	39.7776	40.6023	45.3915	40.0375	36.8088	38.3816	38.3653	38.9857	42.2813	41.0955	39.3536	39.0761	42.9584	36.9585	32.4248	33.1093	31.857	34.2716	30.2088	30.7462	35.3229	33.8415	33.2595	51.1434	49.9986	55.1663	53.9008	54.3224	51.3078	57.5648	52.8984	54.9527	46.3423	50.1197	46.7382	53.6492	50.0244	53.9112	50.7775	51.1298	52.5308	62.1389	64.504	61.0904
ENSMUSG00000004937	Sgta	162.388	154.881	156.234	135.535	132.402	147.33	156.633	133.196	106.067	116.985	112.558	121.767	123.872	126.905	126.963	115.858	115.993	106.744	119.154	123.092	118.047	120.297	128.192	129.619	113.531	124.49	120.434	149.861	150.798	132.581	154.753	140.57	136.513	158.243	142.995	133.885	128.918	149.024	132.658	146.498	136.201	147.442	137.072	134.93	134.764	140.353	142.652	139.145
ENSMUSG00000004939	Nmrk2	0	0	0	0	0	0	0	0	0	0	0	0	0	0	0	0	0	0	0	0	0	0	0	0	0	0	0	0	0	0	0	0	0	0	0	0	0	0	0	0	0	0	0.027962	0	0	0	0	0
ENSMUSG00000004945	Tmem242	109.306	94.3404	110.642	98.0385	100.043	89.3862	102.171	93.9678	96.6776	112.927	102.301	113.702	118.758	113.622	115.296	113.495	119.581	119.153	109.532	118.274	108.086	103.169	110.589	122.538	114.619	116.229	118.103	108.506	173.677	118.625	136.016	112.14	109.724	112.98	110.502	107.774	127.513	146.96	128.883	134.973	126.432	133.565	126.849	127.828	134.988	133.982	128.895	123.455
ENSMUSG00000004947	Dtx2	28.7421	26.4315	29.5582	26.7003	27.0948	29.5849	37.1511	34.0287	26.7036	27.3952	25.8331	30.1271	26.7765	27.0543	26.6996	30.1392	33.0094	25.5333	23.2305	25.9617	23.8562	21.2481	24.6967	24.0266	24.1313	26.2936	27.1885	20.3435	15.5477	20.1504	21.3341	18.1902	18.647	21.2158	20.7041	18.5176	22.6256	24.2166	20.4741	23.2342	22.1081	21.5958	22.1118	21.0054	22.7376	25.1849	25.982	23.7337
ENSMUSG00000004948	Zp3	0.123791	0.0422658	0.0955458	0.0595015	0.0449493	0.0411447	0.208548	0.0444386	0.0442437	0	0.0469853	0	0	0.0484475	0.046511	0.0425297	0.0702332	0.0721176	0	0.0206315	0	0.04246	0.0407575	0.043695	0.0221763	0	0	0	0.136857	0	0	0.0598966	0.0905743	0	0	0	0	0.0460684	0	0	0.0420661	0	0.0421222	0	0.041446	0.0831025	0.0381391	0.0764055
ENSMUSG00000004951	Hspb1	21.7552	15.7144	14.3027	55.7152	46.7499	54.7759	94.6851	76.6579	65.0836	106.772	103.696	121.242	88.0922	90.8563	89.9288	135.974	133.129	138.914	118.588	129.341	143.262	101.709	105.996	103.341	112.97	126.962	132.435	0.289922	1.60475	1.25467	0.284937	0.472973	0.722426	1.2594	0.692838	1.4173	3.20018	3.79806	2.80793	2.17372	1.69939	1.72001	7.34297	3.85974	3.88215	13.0726	13.6879	15.8336
ENSMUSG00000004952	Rasa4	1.56002	1.52512	1.63579	0.678787	0.981965	1.02541	0.57552	0.400023	0.392035	1.12661	1.29466	1.04728	1.43419	1.04458	1.5305	1.31988	1.27833	0.834425	1.77952	2.19855	2.47409	1.65977	1.64848	1.75588	2.61282	1.56892	1.92936	0.446672	0.578643	0.707461	0.771381	0.859801	0.267657	0.699687	0.325159	0.511374	2.77312	2.13569	1.52479	1.84796	1.61902	1.50108	2.9353	2.54152	1.92166	4.04409	4.04502	4.06334
ENSMUSG00000004961	Syt5	14.2236	12.3707	14.4912	9.65168	10.249	11.4527	4.71812	4.40546	3.89052	12.1477	12.9468	13.4941	10.8556	9.79992	11.3058	8.81749	7.38174	7.53464	10.2069	11.4002	11.794	8.96492	9.16275	10.5449	7.14796	7.07381	8.11812	0.461989	0.669935	0.519399	0.303026	0.285972	0.209342	0.320914	0.402277	0.41062	1.38477	1.08673	0.961079	0.739508	0.542998	0.576016	1.12579	0.681583	0.757044	26.3555	25.3108	25.9886
ENSMUSG00000004980	Hnrnpa2b1	1119.97	1038.48	983.899	898.108	1030.71	877.027	964.04	982.607	1144.56	1030.45	1013.22	999.19	1026.11	1018.7	1158.41	979.213	915.076	1116.77	785.718	766.512	864.667	856.893	863.607	831.71	863.068	839.447	755.936	1182.73	1141.01	1233.42	1643.48	1369.16	1448.85	1233.99	1767.9	1413.29	1252.45	1174.83	1060.33	1221.2	1176.69	1175.96	1158.17	1061.78	1157.69	1112.18	1096.03	1019.71
ENSMUSG00000004988	Fxyd4	0	0	0	0	0	0	0.0317243	0	0	0	0	0	0	0	0	0	0	0	0	0	0	0	0	0	0.0235066	0	0.0252692	0	0	0	0	0	0	0	0	0	0	0	0	0	0	0	0	0	0	0	0	0
ENSMUSG00000004994	Ccdc130	19.0662	18.9739	18.3326	14.9193	13.3217	19.6184	20.7396	19.9995	18.048	13.2512	11.8411	12.4098	12.2625	12.9125	12.0651	12.6124	13.8963	11.82	14.3296	15.1663	12.2544	14.1309	15.2761	15.4225	15.3378	20.0609	20.6561	13.348	13.3827	15.473	27.8229	18.2913	19.2098	18.2426	15.4556	20.9118	14.8672	14.3462	10.7306	15.3893	13.6257	12.6553	10.9602	14.9747	10.2363	13.6746	11.1049	14.6922
ENSMUSG00000004996	Mri1	14.8904	10.7257	11.0489	12.0083	10.8819	13.5504	13.7559	9.56403	10.6964	11.8262	11.1668	13.3345	12.4355	12.2172	14.0119	14.4749	15.4598	14.2685	13.8414	16.3851	16.1988	12.9493	14.68	14.4391	15.9089	15.5771	16.8316	15.7086	16.828	14.4515	17.2874	16.6654	12.4672	13.1899	12.7448	14.4663	15.4944	20.04	16.7422	16.8876	17.7646	21.3784	19.3821	18.5252	20.2131	13.5395	13.6671	15.4734
ENSMUSG00000005034	Prkacb	44.0456	48.9355	46.6599	51.6841	52.4295	52.4014	49.2657	50.4783	53.4194	53.4413	53.2465	53.3423	52.4544	53.3255	55.0806	51.2957	54.6316	52.3483	45.5242	46.2605	47.694	42.6154	42.7071	43.6361	42.737	46.1509	47.102	61.3339	50.4621	61.4747	47.4618	57.2639	59.1057	58.0091	60.0286	56.205	72.3113	68.965	65.7948	69.7514	69.3777	66.1843	67.0304	64.8053	66.7809	50.7313	48.5334	47.7956
ENSMUSG00000005043	Sgsh	7.99265	7.11077	7.70874	6.06993	6.08424	8.04586	8.06734	7.29456	6.26803	5.46702	5.61063	6.12655	5.53376	5.21838	5.74788	5.33233	6.34784	5.20229	6.15728	7.32441	6.50384	4.88851	7.17836	4.59116	6.34826	7.15574	6.31583	5.48129	2.92292	3.91001	5.61427	4.46285	4.16003	5.70343	6.10104	4.79966	4.5403	4.01215	3.93994	3.6752	3.65018	4.66845	4.3788	3.96483	3.73849	4.76378	4.70266	5.00844
ENSMUSG00000005045	Chd5	0.228452	0.174928	0.161302	0.265644	0.257613	0.26165	0.172731	0.173654	0.187721	0.41612	0.480577	0.687237	0.274446	0.389135	0.296081	0.203527	0.181107	0.233397	0.367522	0.35018	0.358716	0.240519	0.205185	0.255713	0.551215	0.24786	0.427457	0.052527	0.0786331	0.0920331	0.0457648	0.10172	0.0884706	0.0629786	0.0720843	0.0609315	0.244055	0.234245	0.159161	0.169878	0.270155	0.168976	0.138514	0.155631	0.139922	0.282373	0.292879	0.260142
ENSMUSG00000005054	Cstb	124.035	121.823	127.751	220.807	218.305	203.199	203.715	208.988	210.386	245.374	250.33	266.762	211.401	208.229	226.509	217.743	233.228	244.075	232.166	214.375	203.895	219.491	200.947	193.774	219.206	216.591	207.049	86.2623	117.61	101.326	94.4179	90.9026	101.601	90.402	94.1389	94.8559	96.4822	103.599	86.9104	94.2145	94.3377	101.121	96.9352	84.3201	97.6693	145.336	139.682	132.764
ENSMUSG00000005057	Sh2b2	12.0293	10.609	11.3133	10.9518	9.70788	11.5975	12.7537	10.9729	9.15174	11.6889	12.0395	14.1463	13.4216	12.9828	12.8958	11.0069	12.1611	10.384	10.1513	10.4242	9.99046	9.26467	8.34696	9.26122	7.69835	7.77171	9.372	17.7489	14.2087	15.9344	18.7685	18.2921	16.3048	17.9518	15.6445	16.6709	13.7238	15.5565	14.2149	13.6874	13.4622	14.3472	13.8957	13.8614	13.6345	13.3727	14.1952	13.3239
ENSMUSG00000005069	Pex5	31.9284	29.1621	29.118	27.8574	27.6477	27.1621	26.3351	23.1296	23.1599	41.5054	38.5337	42.4659	41.3164	41.3815	42.6128	40.1542	38.3913	41.6941	32.7537	32.8647	34.6686	34.4206	33.8399	32.812	34.4749	34.0916	34.4226	27.9185	21.4304	28.0577	38.4395	29.1669	27.2608	27.8429	27.7858	26.8729	44.798	45.7055	42.3798	48.171	46.8416	47.8111	44.002	41.385	42.8239	36.9848	35.5253	38.0667
ENSMUSG00000005078	Jkamp	42.7338	47.6241	45.3922	47.3594	41.5463	52.1599	53.0509	47.6099	42.9982	41.0273	37.5328	43.411	40.0155	41.5875	40.1375	39.9802	42.6596	37.3931	34.3563	33.9807	32.3015	32.0164	27.787	31.3625	31.4615	31.6673	30.2067	38.5753	48.5274	34.8773	30.1366	34.4123	33.9364	40.273	33.7017	33.9552	36.843	37.2019	29.1777	39.5626	37.7277	36.4171	37.6486	33.9249	32.5256	36.5843	34.3159	35.2227
ENSMUSG00000005087	Cd44	6.21697	7.54814	5.54986	5.74451	7.69991	6.44051	6.43932	6.79731	6.25032	3.00193	3.23752	2.34506	3.46525	3.67346	4.12632	3.8927	4.16376	4.13957	4.60324	6.02897	5.54335	4.0594	4.89507	3.91512	12.7924	12.3107	10.2412	1.95139	1.30179	2.21885	1.31542	1.73541	1.44938	1.2399	1.21717	1.04839	3.63278	3.19004	2.65114	2.91909	2.35654	2.30099	1.81576	1.53183	1.41787	1.05933	1.29709	0.977545
ENSMUSG00000005089	Slc1a2	0.25457	0.133672	0.318334	0.0720642	0.153356	0.123441	0.0445841	0.0568351	0.129636	0.0147565	0.014005	0.0116893	0.00190158	0	0.0683509	0.0135749	0.0301087	0.0713573	0.0590333	0.072215	0.0134767	0.0681625	0.0562426	0	0.014311	0.0135725	0	0.0586313	0.00232416	0.28493	0.0638937	0.154179	0.260798	0.193805	0.0777191	0.0186755	0.190632	0.059812	0.0546623	0.365591	0.391135	0.193276	0.163873	0.219725	0.129197	0.0730981	0.148059	0.232161
ENSMUSG00000005102	Eif2ak4	19.7788	20.2563	19.4646	21.4001	22.1439	21.593	20.8455	21.0193	18.9789	17.006	16.6283	17.7157	16.6626	17.6915	17.2452	16.9699	17.6337	16.4353	13.9838	12.2598	12.0548	11.7831	11.9421	11.0763	14.059	13.8838	12.1891	18.7491	12.4596	18.5247	21.0117	21.157	20.2052	20.1905	19.8553	17.9956	16.6757	15.8389	14.5873	15.2307	15.9446	14.8898	15.4745	14.2694	15.0186	15.6361	16.3955	15.4254
ENSMUSG00000005103	Wdr1	81.4791	83.2498	82.0536	82.7895	88.3315	81.1658	99.667	94.1377	88.3605	104.97	99.5349	110.081	97.0719	95.2436	100.201	100.67	96.2743	97.357	83.5133	82.2011	85.5904	81.5791	87.2323	86.4178	79.3066	86.6382	86.1971	130.006	112.732	129.571	98.9133	100.251	99.3701	109.253	108.873	105.409	120.997	116.458	118.196	122.472	108.86	111.789	115.619	102.545	107.893	95.5517	93.0857	91.136
ENSMUSG00000005107	Slc2a9	0.232575	0.140518	0.182393	0.625704	0.477998	0.455821	0.866865	0.492403	0.495833	0.851444	0.804498	0.527889	1.15584	1.10595	1.08341	1.54316	0.881324	1.04845	0.902849	1.0806	1.10393	1.16609	1.07275	0.998851	2.1771	2.62737	2.23587	0.377706	0.189391	0.268156	0.465504	0.272011	0.498681	0.575919	0.447329	0.455805	0.499938	0.541178	0.521364	0.372103	0.443812	0.31102	0.333848	0.380814	0.362241	0.764788	0.628838	0.488522
ENSMUSG00000005124	Wisp1	1.11925	1.13754	1.15823	6.41469	7.06845	6.25623	5.88242	5.62315	5.24391	6.22157	5.82106	5.99233	6.25092	6.54682	6.37957	6.77933	6.39292	6.06721	4.68147	5.31789	4.81424	4.79753	4.27257	4.56792	6.35564	5.08005	5.71548	2.61109	1.9105	2.76534	1.24854	0.71131	0.925973	0.875363	0.919888	0.982792	4.63102	3.90482	3.60986	4.89346	3.96091	3.60367	7.15759	5.22368	4.69164	1.61758	1.36135	1.29405
ENSMUSG00000005125	Ndrg1	8.20748	8.00887	8.86906	6.39819	6.44542	6.84965	5.98452	5.20974	4.8228	6.89257	7.37524	7.1123	6.37903	6.91572	6.92041	5.37693	6.22892	6.52154	7.36631	7.21605	7.80572	10.7333	11.079	10.1803	10.5896	11.0815	11.1841	1.18381	0.713866	1.60351	2.3857	1.85114	1.82832	1.11852	1.31267	1.94782	3.10863	2.58512	2.78717	4.13537	2.88301	3.15665	4.02316	3.27097	3.42774	20.4377	21.4329	17.8547
ENSMUSG00000005131	4930550C14Rik	0.669094	0.424831	0.454421	1.35021	0.827355	1.11208	1.5469	1.39477	1.60263	1.38115	0.966035	1.0206	1.2826	1.29134	1.48537	1.10441	0.887028	1.11884	1.88943	1.56067	1.56788	2.15615	2.28973	2.17236	1.38935	1.16963	2.07004	0.123769	0.394026	0.302378	0.521693	0.151104	0.2942	0.207989	0.207101	0.31499	0.393842	0.479225	0.245412	0.267313	0.182008	0.191957	0.273389	0.260957	0.510683	0.67422	0.474436	0.44214
ENSMUSG00000005142	Man2b1	9.92902	9.97091	9.59363	8.96615	9.66179	8.65034	9.62468	9.15116	6.93453	11.5989	10.8477	12.2622	10.9592	10.5331	10.7881	11.1243	11.5909	11.0115	10.3039	12.6883	13.6281	10.3528	11.7959	12.1001	9.88077	10.8085	11.9979	7.78444	5.84282	7.80486	8.17257	8.15802	7.47798	7.82515	8.49136	7.95462	8.97046	8.68929	7.43482	7.4426	7.58969	7.16972	8.47087	6.59689	7.49826	10.4507	10.8962	10.3634
ENSMUSG00000005148	Klf5	13.3241	13.7889	12.6594	28.6483	25.7632	32.2486	20.4411	22.0239	20.0723	29.7744	31.6256	24.3773	26.3115	25.1788	25.2324	48.3321	52.3281	37.5107	33.5679	41.1754	28.6468	34.3878	37.9139	35.4186	56.4017	71.2002	65.8344	0.457998	0.221036	0.448856	0.358748	0.607413	0.585503	0.640225	0.368696	0.47775	0.490899	0.606508	0.749319	1.16354	0.841656	0.789648	1.15474	0.503559	0.823802	19.8253	18.1147	17.5847
ENSMUSG00000005150	Wdr83	47.7046	41.6327	42.8318	37.5526	42.8162	42.9886	46.1714	42.6255	35.0515	41.8556	37.5588	39.5195	38.838	39.5488	40.3895	38.3713	40.2094	40.6556	35.012	36.2954	34.4216	32.9748	36.0438	35.3862	37.0011	38.8289	36.9574	40.9915	66.8518	43.9339	50.6844	42.5609	42.5182	44.2858	46.7204	41.315	39.5382	44.6552	38.1071	43.0001	39.7058	42.6786	38.8124	37.5895	41.4014	43.0137	41.5105	41.9648
ENSMUSG00000005161	Prdx2	941.115	880.213	937.211	840.273	877.746	867.175	954.819	802.399	801.333	1070.84	963.317	1163.28	1176.21	1108.76	1157.83	1118.18	1055.3	978.904	782.096	797.197	770.017	755.677	764.25	795.654	767.101	790.713	787.297	868.58	1456.51	952.678	1079.13	917.144	916.059	900.859	686.393	814.622	1127.45	1300.34	1121.8	1349.4	1165.29	1334.95	1172.66	1049.41	1232.06	1298.19	1239.2	1199.84
ENSMUSG00000005198	Polr2a	111.477	126.446	104.415	116.979	127.141	127.053	110.631	117.265	94.6529	103.312	121.076	106.527	103.097	107.224	105.635	102.373	108.865	91.65	71.0252	83.498	95.1145	77.4758	82.1308	81.9486	72.3668	69.6247	85.4498	108.155	64.1173	90.8204	85.3106	106.604	93.3813	105.323	117.149	93.9433	114.304	113.302	115.381	90.8726	136.206	112.155	110.196	98.3681	108.733	96.7363	108.278	108.873
ENSMUSG00000005202	Shbg	0	0	0	0	0	0	0	0	0	0	0	0	0	0	0	0	0	0	0	0	0	0	0	0	0	0	0	0	0	0.021205	0	0.0723111	0	0	0	0.0185626	0.0584865	0.040481	0.040552	0.101813	0.0572622	0.0809553	0.056245	0.0421129	0.0551812	0	0	0
ENSMUSG00000005204	Senp3	137.541	133.102	135.688	126.979	127.383	121.792	136.519	123.391	135.571	127.317	119.747	128.673	131.999	129.386	132.151	136.639	128.775	123.275	141.335	130.165	135.856	135.801	126.701	131.597	131.313	127.15	133.512	151.437	170.272	156.711	153.531	166.382	162.268	165.863	160.77	155.956	135.349	145.69	134.712	151.833	128.908	149.653	143.495	138.749	144.51	127.504	127.897	126.365
ENSMUSG00000005220	Corin	0.00623446	0.0206492	0.00779531	0.0441139	0.172188	0.134592	0.0939773	0.0522531	0.0378442	0.0421646	0.0702207	0.062929	0.0233844	0.0909094	0.051213	0.0821015	0.101782	0.0718266	0.0151972	0.0425956	0.0391803	0.0332	0.0323113	0.0106687	0.0884881	0.0253681	0.0641034	0.496284	0.237586	0.288024	0.148935	0.110638	0.0617938	0.27938	0.104587	0.175925	0.441393	0.285412	0.366606	1.01321	0.682807	0.612709	3.13597	2.66605	2.42459	0.0670612	0.143282	0.0530716
ENSMUSG00000005225	Plekha8	22.3689	24.198	24.3704	22.163	23.684	23.2662	20.0041	22.1521	22.2223	23.2612	23.9056	23.0879	23.7218	24.7727	23.8147	22.7915	24.3215	21.3625	13.0526	12.1192	10.9801	12.6877	11.4635	10.4882	11.431	11.0514	9.93313	26.5716	17.295	27.5758	27.4568	26.667	26.308	22.8298	22.9567	22.8739	34.3668	33.4125	28.0414	31.602	32.4805	29.426	31.3778	28.8782	28.0289	20.8686	22.4415	18.9304
ENSMUSG00000005232	G6pc2	0	0	0	0	0	0	0	0	0	0	0	0	0	0.033962	0	0	0	0	0	0	0	0	0	0	0	0	0	0	0	0	0	0	0	0	0	0	0	0	0	0.0163236	0	0.0323143	0	0.0159511	0.0149826	0	0	0.0135556
ENSMUSG00000005233	Spc25	85.0999	92.1601	98.0288	83.5561	80.3497	78.5072	80.3	84.3925	99.1678	88.641	80.5065	85.1658	87.0699	88.0104	89.6206	81.3573	80.5805	84.8532	74.2881	78.7709	72.6531	86.2724	81.7551	90.7488	83.9636	82.2838	82.0283	129.681	184.99	149.918	180.053	130.741	148.86	132.555	132.609	141.57	125.995	128.205	129.476	136.899	129.254	142.935	120.472	117.005	122.249	103.897	96.7233	92.4127
ENSMUSG00000005237	Dnah2	0.967976	0.935011	0.452355	0.545322	0.576271	1.01239	0.803652	0.409346	0.638932	0.468729	0.808307	0.617838	0.573409	1.08936	0.4939	0.83312	0.651969	0.591124	0.95996	1.1255	1.10402	0.873263	0.849417	0.660179	0.896237	0.832685	0.762241	0.551297	0.0531155	0.423743	0.584299	0.826478	0.524714	0.392843	0.402684	0.622993	0.785254	0.856321	0.765679	0.848946	0.790802	0.780121	0.932201	0.866817	0.611324	0.882254	0.889572	0.869809
ENSMUSG00000005251	Ripk4	27.2189	24.6045	25.2015	39.3354	39.3863	38.6285	42.7813	35.971	32.8147	44.8765	44.6038	44.2913	46.9128	46.7414	43.9703	52.6331	49.432	47.7539	34.5057	34.2352	32.1249	36.7196	39.8707	38.038	36.9475	42.9819	37.4221	0.0922148	0.0767535	0.273024	0.151817	0.140091	0	0.0549503	0.0540052	0	0.0786174	0.0371481	0.126734	0.0672542	0.0632153	0.00745676	0.0482725	0.0309077	0.0884213	30.6063	29.5972	29.5371
ENSMUSG00000005262	Ufd1l	54.2645	57.6613	55.7612	59.7114	54.0232	63.9346	59.1097	59.3382	61.6306	66.5141	59.5444	66.9234	62.1256	67.463	62.2443	62.9491	63.6008	60.8226	63.4993	60.7193	62.1642	60.0687	61.905	58.8666	60.6901	60.1147	58.4344	60.1077	66.474	69.6102	73.9452	72.4036	84.6504	61.8121	65.9834	67.3935	66.8843	66.2341	58.8694	69.2142	67.2472	68.3246	64.3938	57.6911	63.2073	62.8992	58.6273	53.1012
ENSMUSG00000005267	Zfp287	6.72417	6.71368	6.74458	5.88645	6.81446	6.84269	5.19931	4.9858	5.43973	4.80293	5.57954	4.88578	5.24196	5.67764	5.35432	5.07219	5.52587	5.03367	4.16192	4.28214	4.32776	3.913	4.61399	4.26584	4.12243	4.5288	4.2785	8.75806	5.10555	9.02614	8.2818	8.79424	9.37434	8.00171	8.70739	8.28643	11.7213	10.818	9.42548	10.069	10.6932	9.47134	10.3354	9.00684	8.83904	6.5412	6.57089	6.15446
ENSMUSG00000005268	Prlr	0.241719	0.223887	0.276488	0.771831	0.537628	0.544719	0.788046	0.858209	0.905831	2.05285	2.04175	2.09948	1.19319	1.01273	0.938268	1.39472	1.63266	1.25978	1.71317	1.12032	1.0934	1.29293	1.41783	1.28568	1.42182	1.40891	1.45005	0.0107392	0	0	0	0.0141075	0	0	0	0.0170596	0.00249458	0.00837843	0.00242129	0.0702575	0	0.00260599	0.00493497	0.0102681	0.00778464	0.520574	0.504204	0.321586
ENSMUSG00000005299	Letm1	24.7872	24.5472	24.4312	21.547	22.6044	22.3485	25.8038	23.2375	21.9925	22.9895	23.7142	23.7702	24.424	25.1674	25.7391	22.1921	23.8766	21.7879	22.4181	23.7059	22.7645	21.7836	23.7812	23.3953	22.9961	23.2049	22.4473	23.8296	23.9376	22.4249	27.0659	21.6496	22.3857	22.8584	22.9959	21.7829	24.4784	25.2468	24.4261	24.7834	24.8983	25.3325	24.3106	22.4899	23.7723	23.5949	23.944	23.094
ENSMUSG00000005312	Ubqln1	112.414	128.899	120.806	104.865	106.557	106.149	111.418	112.637	111.54	91.7788	87.8318	87.8557	88.2904	87.5499	88.7827	87.4774	91.0326	84.6246	85.1061	87.8879	94.5829	83.4791	90.6902	90.8049	81.3017	90.6658	92.7172	126.258	108.959	117.524	106.27	117.685	114.019	119.47	116.105	107.546	87.5578	89.5172	83.9858	83.7567	89.1842	87.7587	91.5293	87.0343	86.4522	105.28	105.784	103.933
ENSMUSG00000005320	Fgfr4	0.243518	0.341707	0.139394	0.247528	0.41433	0.242621	0.194455	0.377178	0.234659	0.181949	0.118915	0.195778	0.131436	0.151843	0.117338	0.119092	0.114252	0.0607304	0.0755005	0.120641	0.118581	0.0609356	0.124595	0.143875	0.0731897	0.0838316	0.0993597	0.638587	0.285433	0.354927	0.716363	0.685633	0.407602	0.356295	0.496928	0.414813	0.71131	0.723389	0.569203	0.836549	0.526403	0.419084	2.53407	2.03783	1.3185	0.112978	0.0968276	0.126004
ENSMUSG00000005338	Cadm3	10.3651	10.9557	11.9611	3.54196	3.41918	4.08066	4.91015	3.87409	4.06861	2.58397	3.15382	3.87188	3.16214	3.19698	2.81775	2.32584	2.71499	2.24658	1.50515	1.03518	1.45923	2.29654	1.60934	1.69768	1.20925	0.829579	1.16142	3.39231	2.59765	4.3916	1.10366	2.75702	0.971715	0.891454	0.936674	1.13803	7.43864	6.78003	6.37595	4.11868	3.50409	3.06139	2.36316	1.85313	1.4915	17.5116	17.1129	15.0638
ENSMUSG00000005339	Fcer1a	0	0	0	0	0	0	0	0	0	0	0	0	0	0	0	0	0	0	0	0	0	0	0	0	0	0	0	0	0	0	0	0	0	0	0	0	0	0	0.0390362	0	0	0	0.028449	0	0	0	0	0
ENSMUSG00000005354	Txn2	232.388	215.204	225.851	223.98	218.752	232.843	277.241	230.604	212.283	242.532	227.684	243.953	256.808	250.85	253.573	258.472	227.007	230.361	269.052	260.821	246.893	275.174	272.309	271.418	265.548	268.515	257.995	276.675	301.911	268.957	284.301	249.672	254.152	256.874	231.27	231.452	181.869	213.584	195.101	200.167	184.789	205.113	198.128	199.743	208.865	213.902	205.181	204.627
ENSMUSG00000005355	Casp14	0.0258508	0	0.00994168	0.405789	0.423264	0.605828	1.03593	1.18001	1.28973	0.307309	0.219133	0.285676	0.369475	0.239993	0.30807	1.29064	1.20096	1.22093	0.282661	0.354809	0.174813	1.154	1.2486	1.34778	1.03414	1.30033	1.54326	0	0	0	0	0.0208596	0	0	0	0	0	0	0	0	0	0	0	0	0	0.032147	0.0594936	0.0500234
ENSMUSG00000005357	Slc1a6	1.36549	1.29803	1.54772	1.35854	1.54435	1.29468	1.62061	1.94738	1.85504	1.03945	1.02327	1.19461	1.11847	0.863929	1.2463	1.05372	1.15716	1.17481	0.384173	0.57011	0.550391	0.763035	0.674131	0.826263	0.534004	0.488255	0.561402	1.60143	2.25716	1.03074	0.181189	0.622023	0.606341	0.415837	0.634755	0.211364	2.28478	2.85498	2.17196	2.49277	2.27611	2.2173	1.62398	1.44131	1.55276	1.68876	1.77837	2.28535
ENSMUSG00000005360	Slc1a3	10.1985	10.1208	9.73535	23.3416	22.9468	22.8187	22.2272	20.9382	23.3859	16.1183	17.5016	14.9521	12.091	11.6376	12.3902	11.199	11.7974	12.2212	17.3049	16.7441	18.7921	9.97469	10.2687	12.2278	8.93079	10.7874	11.1889	12.4237	9.27128	12.6892	9.32904	10.2704	10.4894	4.40681	4.52283	4.05869	9.07729	8.56358	8.13147	12.2514	13.4488	12.0261	8.53535	6.30303	6.96971	5.14906	5.03935	5.11773
ENSMUSG00000005362	Crbn	28.9701	33.1679	30.6691	25.5066	27.7014	26.2762	24.603	24.9452	29.2819	30.9063	27.6052	30.7961	29.8483	30.1822	29.232	29.6759	28.4944	30.1639	23.7677	21.7592	22.0036	23.9509	23.1542	20.856	24.0683	24.5367	21.3175	25.2169	24.2575	29.1744	25.9284	26.8096	29.7337	27.1422	27.6126	29.5569	29.6584	29.2409	29.0542	32.5415	28.4317	32.6912	32.1576	30.0497	30.3802	37.5622	35.6874	32.9126
ENSMUSG00000005364	Il5ra	0	0	0	0	0	0	0	0	0.0158111	0	0.0172025	0	0	0	0	0	0	0	0	0	0	0	0	0	0	0	0	0.101796	0	0	0	0	0	0	0	0	0	0	0	0	0	0	0.0152322	0	0	0	0	0
ENSMUSG00000005370	Msh6	98.5058	99.226	93.2905	90.5315	95.6955	86.3618	96.1176	93.3772	91.1606	77.2971	78.8787	78.1998	80.0871	81.902	81.9158	85.1234	84.3573	80.4947	65.2301	62.85	60.9332	68.8207	67.5148	65.6235	71.2017	67.4081	64.1379	88.2309	76.7475	89.1244	96.3297	92.4623	91.3063	89.2892	95.1785	91.5759	75.4801	73.0453	68.4963	74.085	76.6029	72.3191	79.7654	69.4495	79.7173	81.7992	81.0931	77.206
ENSMUSG00000005371	Fbxo11	65.0652	68.0099	64.0128	68.8322	74.9258	67.9092	62.0315	67.0734	75.7184	69.4656	68.6324	68.0592	65.4132	63.8137	69.7756	63.6917	64.8936	66.6954	66.6844	66.4347	64.4542	64.065	62.1028	63.0047	64.238	63.5541	66.3548	74.6397	62.4416	77.0683	81.1363	84.6226	89.1501	71.7369	81.6921	81.3517	71.9646	64.3936	68.4484	69.4617	65.4408	67.88	63.7438	58.7776	62.2585	59.3873	59.6241	58.1618
ENSMUSG00000005373	Mlxipl	6.84875	6.47366	6.54346	3.5585	3.9736	4.14695	3.00665	2.88902	2.69405	2.08362	2.26338	2.62031	1.83772	1.5759	1.47008	1.43693	1.4506	1.83164	1.72245	1.61968	1.3661	1.79182	1.25509	1.75206	1.22447	0.880604	1.57891	2.62294	2.01287	2.76888	2.87318	2.67512	3.41623	2.08525	1.71183	1.81156	2.63463	2.9531	2.96921	2.21319	2.12192	2.41272	2.15085	1.99303	2.0569	5.08666	5.36528	5.35466
ENSMUSG00000005374	Tbl2	17.0945	16.0188	15.3839	13.4713	13.1232	14.1045	14.0689	13.6215	12.2992	13.35	13.3523	13.4516	14.0946	13.8749	13.4248	14.6497	13.2662	12.4653	13.5423	12.1506	12.9887	12.827	12.8106	12.2846	14.2078	13.7777	13.5615	12.2775	9.50309	12.4446	11.6046	11.0977	11.8231	13.1394	12.3147	12.1249	18.3113	16.9035	13.6773	16.8217	15.2969	14.5127	17.077	13.9279	13.9499	16.9754	17.098	14.915
ENSMUSG00000005378	Wbscr22	98.0289	93.9725	90.3065	80.4532	86.97	81.2941	91.9867	78.0985	76.491	71.7912	65.926	79.6125	75.5971	74.2544	81.4884	78.4963	78.2463	76.9145	85.3272	88.6268	89.6564	77.9225	89.0148	85.571	83.4842	75.4239	93.0267	113.778	123.143	120.079	129.102	100.613	111.626	99.7748	113.902	105.176	91.5523	88.5949	82.4132	91.7955	78.602	90.2326	88.6211	83.7998	84.8182	80.1696	76.6349	78.106
ENSMUSG00000005397	Nid1	0.904436	1.61129	1.55524	0.910738	0.873083	1.06046	1.13987	1.11616	1.18628	1.21966	1.05465	0.87892	1.54045	1.47533	1.42971	1.50776	2.68954	2.07452	2.21886	2.62231	3.3655	3.12951	3.21371	3.14539	1.39355	1.55912	1.91422	95.4999	63.7336	92.5298	47.9007	52.6752	52.0649	53.2995	56.8261	50.0499	69.1837	66.2154	56.2425	46.8219	55.6983	44.965	65.0754	52.0972	51.9081	3.23115	3.6855	0.991947
ENSMUSG00000005410	Mcm5	169.431	166.637	157.676	132.582	131.291	130.191	166.851	144.816	127.604	113.112	110.747	119.771	121.113	122.44	117.578	118.367	112.327	106.931	87.0409	92.1098	96.6529	101.691	102.96	100.89	95.0735	98.8844	97.7041	188.513	169.001	177.69	182.414	175.058	176.913	192.912	190.692	186.91	152.588	167.177	152.601	172.176	164.845	171.442	167.149	147.316	168.26	126.065	124.278	120.745
ENSMUSG00000005413	Hmox1	11.3777	11.3137	11.291	11.3373	10.2176	11.2287	11.629	9.43718	10.6754	14.1191	14.002	16.5402	9.01111	9.58645	10.5711	9.42433	9.11954	8.96281	9.68535	7.63389	9.23493	7.21256	7.1181	6.6775	5.91721	5.51142	5.24973	20.9628	21.8885	20.5817	19.6175	20.2425	22.5999	21.3233	20.7761	21.3225	23.464	23.206	20.1904	28.314	26.8594	26.9651	24.685	22.9605	24.7754	8.21919	9.07071	7.7403
ENSMUSG00000005417	Mprip	141.031	140.862	138.805	149.538	148.518	149.282	169.824	158.343	147.758	171.401	160.335	178.234	161.107	163.586	159.931	171.05	165.017	158.404	135.502	130.422	133.579	119.653	126.223	122.752	125.172	127.701	123.509	131.223	129.975	130.976	141.246	134.118	134.139	150.422	147.538	135.351	155.659	163.223	138.544	157.78	151.537	147.43	160.13	149.033	153.55	155.014	148.589	142.337
ENSMUSG00000005442	Cic	102.744	95.871	97.4789	93.58	89.3354	108.445	110.307	94.5972	77.7043	79.2464	85.62	80.0751	79.6502	82.7164	78.4653	85.3208	83.9062	74.2838	81.7015	85.5553	86.7676	84.2187	89.2458	86.2997	93.2928	91.249	94.5864	59.5586	57.231	55.5373	75.0406	65.6049	59.8479	69.8908	60.1493	63.7882	88.1876	84.4275	71.8996	90.8167	92.142	77.0688	87.9284	76.0488	79.8632	105.542	101.191	93.7427
ENSMUSG00000005447	Pafah1b3	275.674	261.774	272.286	305.342	296.609	314.884	312.779	297.499	256.684	282.867	247.94	290.113	307.209	308.866	308.092	307.082	300.68	303.444	247.159	260.969	261.023	261.05	247.772	262.369	266.004	270.125	262.011	207.382	235.238	207.224	216.453	217.675	211.83	244.508	218.06	215.467	258.005	328.295	278.166	340.354	275.85	335.319	294.544	287.91	303.217	297.829	297.637	293.295
ENSMUSG00000005465	Il27ra	0.0224335	0	0.017257	0	0	0	0	0	0	0	0	0	0.00843142	0.0208026	0	0.00924975	0	0	0.0181842	0.00905948	0	0.0183869	0	0	0.0195242	0	0.020936	0.0521528	0.155855	0.116482	0.0411622	0.0904983	0.213044	0.0213244	0.136635	0.0556004	0.378647	0.211897	0.18218	0.253727	0.286029	0.222649	0.365099	0.209896	0.221356	0.0929407	0.0602031	0.0781315
ENSMUSG00000005469	Prkaca	116.522	113.588	111.305	90.2692	90.1819	87.684	95.1151	86.1206	82.1378	94.7068	94.0091	97.4808	95.2129	92.6004	94.8449	90.7682	89.335	84.4411	80.9819	82.0468	80.3123	81.6853	81.71	79.561	78.6524	83.4573	79.6628	126.57	114.512	123.892	125.494	112.092	112.905	121.304	112.111	113.357	141.838	154.656	126.54	142.977	143.222	145.997	143.193	123.384	135.559	120.03	116.396	107.751
ENSMUSG00000005470	Asf1b	57.2371	56.1449	57.087	44.2818	41.6048	40.9543	46.2401	44.6445	45.5609	36.9187	36.4025	38.2555	38.7656	40.3921	40.573	35.9682	35.8742	30.2998	38.4799	39.8691	40.3237	44.0421	46.1487	42.4535	42.5321	43.0837	40.2813	65.6369	69.8729	72.4496	68.0332	67.6473	70.2955	70.0033	69.9435	68.3526	45.6244	50.691	43.3555	48.8182	50.6051	50.9042	50.0498	47.4139	50.5676	53.5887	52.8869	47.094
ENSMUSG00000005474	Myl10	0	0	0	0	0	0	0	0	0	0	0	0	0	0	0	0	0.0421241	0	0.0362381	0	0	0.0366687	0	0	0.0390712	0.0367554	0.084626	0	0	0	0	0	0	0	0	0	0	0	0	0	0	0	0	0	0	0	0	0
ENSMUSG00000005481	Ddx39	125.669	124.949	124.407	86.9783	90.4574	85.6629	125.017	106.869	101.33	90.6432	82.1638	94.166	91.9806	92.9314	95.089	96.9922	87.5818	82.9643	67.0135	70.4122	72.0729	72.3012	71.5951	74.8668	78.4694	74.9874	75.8425	139.295	172.481	151.608	169.368	149.18	142.735	136.592	142.019	135.465	94.885	106.192	96.3903	105.026	103.924	112.848	105.505	100.942	111.056	123.327	118.31	116.224
ENSMUSG00000005483	Dnajb1	55.1532	58.5536	59.6206	53.9107	53.8786	53.8417	55.6768	57.2747	56.4576	81.3103	77.893	87.5645	83.1333	80.3387	79.7848	81.0547	77.3518	72.3454	76.7745	81.6096	77.6478	75.1684	75.9223	67.2362	65.6971	73.8841	66.5359	61.7332	58.3813	61.9143	56.1969	53.1629	64.3491	68.1764	62.5429	66.5651	68.9122	73.8753	58.036	72.2281	69.1359	68.6846	78.057	67.3373	71.1706	68.6979	66.7675	61.5883
ENSMUSG00000005493	Msh4	0.0326141	0.0233197	0.0864747	0.00694272	0.0326803	0.0171266	0	0.0484491	0	0.086598	0.0346385	0.0259274	0.0199089	0.0081818	0.0313371	0.0232072	0.0252683	0.0548941	0.0568879	0.0142839	0.0632691	0.138146	0.0785131	0.0891946	0.088258	0.026671	0.0395663	0.0492645	0.00981984	0.0333486	0.110508	0.00910243	0	0	0	0	0.0215229	0.0505716	0.00955952	0.0321919	0.0622502	0.0159406	0.057862	0	0	0.0116556	0	0.0261677
ENSMUSG00000005501	Usp40	17.8946	18.0914	16.647	18.8144	19.8158	18.1724	21.2096	20.6493	21.3981	23.83	23.5948	22.6724	23.6399	22.4997	23.786	25.9893	23.874	26.3766	21.5712	20.4063	20.0361	20.9067	20.3497	20.5906	22.0479	22.1637	20.2347	19.2021	17.2429	19.4878	21.3603	20.9641	22.376	20.526	22.5896	20.4569	27.0293	24.9022	23.784	27.317	26.0306	24.77	26.3427	23.5407	24.279	19.97	19.0673	18.6087
ENSMUSG00000005503	Evx1	0.157684	0.0549726	0.0649784	0.177412	0.222325	0.235758	1.57458	1.24483	1.4419	1.69301	1.55539	1.41473	0.823607	0.610163	0.664934	1.48085	1.73276	1.56872	1.06405	1.04544	0.934669	0.46139	0.486805	0.529754	1.10822	0.665879	0.775711	0	0	0	0	0	0	0	0	0	0	0	0.0828843	0.0301416	0.0280818	0.00939577	0	0.00926615	0	0.0526957	0.0781136	0.125354
ENSMUSG00000005505	Kbtbd4	39.5846	35.3318	37.2979	30.9573	30.9418	33.7775	32.86	31.1094	28.7919	28.7299	26.0581	26.4295	31.5999	32.2636	29.4336	32.6314	32.0974	27.9987	21.2599	22.2118	21.8269	21.1584	22.96	20.3809	23.4964	25.1413	21.9902	40.6523	38.2086	40.7855	37.2284	41.4573	43.6606	44.3558	41.5838	43.2931	43.9927	49.5053	42.5087	49.8231	46.603	48.7308	47.8572	42.4284	47.9287	36.4865	34.6702	31.7769
ENSMUSG00000005506	Celf1	121.474	140.295	135.293	116.865	117.849	116.216	115.916	125.64	125.888	118.488	115.293	115.029	113.235	111.579	109.93	108.971	113.162	103.922	101.384	94.3173	95.4468	101.572	99.3794	91.9244	87.5932	83.7828	81.4029	152.9	118.681	151.36	144.548	148.833	153.766	142.571	144.156	142.003	132.732	136.233	118.659	128.874	136.499	123.002	121.505	110.105	120.349	125.795	124.66	115.094
ENSMUSG00000005510	Ndufs3	74.5739	67.8238	72.2587	65.6561	65.4056	63.3601	72.5815	69.0197	67.6291	70.1342	74.7056	77.6399	81.3434	82.7759	89.1268	79.8135	81.555	81.601	67.8223	70.8116	67.5539	77.92	68.232	74.83	80.1492	73.0553	72.5258	74.8531	93.7976	74.8606	78.6116	73.1553	87.4135	76.6314	84.7312	75.9025	79.2801	86.5945	79.0246	87.6996	78.6404	84.8379	83.7033	86.8774	87.6001	82.5395	79.8508	80.472
ENSMUSG00000005514	Por	85.5739	91.5235	86.5952	57.93	65.2181	62.2713	73.4737	66.5199	56.6269	46.2329	47.9208	49.6012	50.8005	49.0801	49.1971	50.005	45.9516	43.6357	52.1343	57.5802	69.3649	56.6739	63.583	60.6772	58.7118	64.9403	60.0548	77.7614	50.2435	67.5961	72.5723	61.3374	63.8537	80.1865	109.707	77.9884	73.705	79.8198	66.7166	78.1011	71.1853	76.6859	79.3457	70.6575	80.1414	99.37	95.1003	90.3144
ENSMUSG00000005533	Igf1r	31.5047	32.5704	29.2539	33.878	36.9327	35.3356	37.8671	36.2194	32.3023	24.0412	26.2056	22.8252	26.8324	27.4543	25.7049	29.6258	31.7289	27.1827	16.6048	19.2153	18.8611	16.2421	17.0933	15.4021	20.1707	19.4551	18.7341	22.173	6.67717	21.8816	24.1417	22.9438	22.7169	19.1589	22.2895	17.3659	29.2657	26.6974	22.4057	19.8715	28.5122	20.5021	24.0879	20.885	19.5999	37.2437	37.7429	32.5042
ENSMUSG00000005534	Insr	12.1812	12.42	11.2555	11.7656	12.731	11.6777	12.0071	11.52	11.46	17.0128	18.5562	16.4241	14.566	14.2274	13.868	14.8231	15.2841	14.7991	12.596	13.4023	14.4538	11.4413	12.2023	12.6515	11.8645	11.1545	12.8366	10.452	6.72263	10.1479	9.40684	10.424	10.4517	9.34144	10.5158	9.08081	12.3479	11.109	10.4194	10.3658	12.8878	10.5714	10.6568	10.1281	9.29944	14.9191	15.9809	14.8589
ENSMUSG00000005540	Fcer2a	0	0	0	0	0	0	0	0	0	0	0	0	0	0	0	0	0	0	0	0	0	0	0	0	0	0	0	0	0	0	0	0	0	0	0	0	0	0	0	0	0	0	0	0	0	0	0	0
ENSMUSG00000005547	Cyp2a5	0.185672	0.335013	0.229306	0	0.177954	0.0889536	0.131741	0.100464	0	0.0397808	0.0329397	0	0	0	0	0	0	0	0	0.0645275	0	0	0	0	0	0	0	0	0	0	0	0	0	0	0	0	0	0	0	0	0	0	0	0	0	0.302345	0.140786	0.224828
ENSMUSG00000005553	Atp4a	0.222332	0.523442	0.550453	0.214146	0.0887919	0.11155	0.640741	0.126436	0.0805468	0.0517	0.0971254	0.329703	0.195809	0.140034	0.064509	0.214128	0.270653	0.318489	0.25491	0.149099	0.114838	0.137537	0.181299	0.178205	0.424087	0.252503	0.179065	0.23563	0.193943	0.619438	0.24311	0.467612	0.28298	0.366568	0.139222	0.191768	0.0520717	0.111375	0.0657794	0.137354	0.130657	0.13653	0.174821	0.072361	0.21624	0.258434	0.415822	0.474426
ENSMUSG00000005566	Trim28	814.609	849.779	818.937	818.297	765.839	834.189	974.511	864.478	708.158	604.362	613.749	651.012	631.383	642.395	618.23	637.729	637.813	588.787	642.97	663.625	719.097	655.185	669.047	693.501	665.439	665.563	740.508	899.577	1235.97	804.032	792.836	847.191	777.276	1006.52	787.819	904.891	672.383	752.9	681.629	777.23	765.325	773.666	762.114	694.066	830.65	636.854	637.832	659.024
ENSMUSG00000005575	Ube2m	232.195	257.871	251.312	215.408	218.007	234.678	250.264	238.034	216.59	206.523	190.439	207.774	196.793	199.044	189.228	183.641	193.185	170.373	202.99	209.83	218.773	192.735	204.732	205.642	178.653	183.343	208.74	313.744	334.707	300.33	285.951	286.022	291.786	313.269	293.315	269.688	212.85	237.964	223.33	230.232	216.038	237.488	238.726	240.863	232.876	212.079	210.661	206.781
ENSMUSG00000005580	Adcy9	0.746763	0.53864	0.727306	0.281532	0.365193	0.363513	0.21103	0.228725	0.208544	0.425762	0.390151	0.344445	0.375257	0.4057	0.290172	0.288903	0.309003	0.263575	0.691929	0.483125	0.564814	0.506061	0.355745	0.334771	0.246692	0.338384	0.360728	0.518964	0.0966368	0.466434	0.572969	0.647262	0.527193	0.382247	0.427238	0.442165	0.891882	0.922049	0.848602	0.907205	0.949726	0.611379	1.02565	0.773545	0.760281	0.641051	0.726485	0.484078
ENSMUSG00000005583	Mef2c	0.211862	0.193642	0.219539	0.19458	0.121494	0.165984	0.0823131	0.0703468	0.133899	0.485664	0.31279	0.150339	0.316086	0.242085	0.171111	0.174889	0.268265	0.312948	1.26167	1.1227	1.21342	0.474159	0.599235	0.445406	0.177333	0.373974	0.171449	6.93297	4.14153	6.49212	9.47867	8.69165	9.0036	7.05588	6.08099	6.36637	9.85334	8.14622	6.534	13.0777	12.3973	8.81226	10.6883	8.61353	7.46694	2.03594	1.84992	1.19487
ENSMUSG00000005609	Ctr9	60.4506	63.5412	57.5408	70.6185	78.2861	72.5935	74.9231	77.0457	73.2578	73.5307	72.8927	72.1482	67.0921	66.0286	68.2089	74.543	73.4306	69.9153	58.3083	60.9701	64.8652	53.8776	64.2591	64.1828	56.3531	65.5198	67.1367	57.6734	50.0726	57.0756	61.6758	60.2263	58.9953	55.4106	61.4614	53.5449	60.7242	56.6778	50.4678	57.2369	61.4391	55.6455	56.4544	47.1975	50.2863	52.9743	53.4071	49.1794
ENSMUSG00000005610	Eif4g2	1266.05	1164.12	1201.5	1040.49	1063.69	1034.77	1070.75	1050.34	1088.35	1112.97	1141.66	1119.03	1108.04	1092.19	1104.49	1076.49	1122.06	1126.18	877.232	822.589	800.153	902.599	848.33	845.508	849.232	867.393	837.966	1219.91	1152.29	1276.72	1308.46	1228.33	1229.01	1129.96	1198.02	1209.61	1171.42	1100.9	1168.17	1195.42	1186.96	1248.4	1183.37	1112.17	1250.12	1380.98	1362.7	1341.45
ENSMUSG00000005611	Mrvi1	0.0109888	0.00454781	0	0.0345582	0.00946018	0.0177581	0.0127367	0	0.0190537	0.00464162	0	0	0.0041196	0.0152259	0.0726704	0.00451983	0	0.0210868	0.0223271	0	0	0.0135389	0.00439747	0.214841	0	0	0	1.36353	0.968007	1.12932	0.423822	0.675857	0.72391	0.751723	0.484581	0.967911	2.63511	1.59001	1.79755	1.40612	1.94111	1.66968	2.104	2.40934	2.37596	0.136345	0.385018	0.0637673
ENSMUSG00000005615	Pcyt1a	27.3506	27.2513	27.4023	22.2585	24.1745	24.1132	23.6816	21.6099	23.6381	21.3665	21.1741	21.8528	22.3171	20.3829	20.6166	20.0417	19.0851	18.3824	29.0584	25.1061	25.4623	22.7295	21.8909	20.3988	18.2257	21.1962	18.758	44.6406	31.8326	45.9167	49.5627	48.6425	51.6276	35.4497	36.5737	32.5415	40.2655	42.1032	37.5786	39.6217	41.4746	40.8563	29.4256	26.1868	29.4782	25.7199	25.126	23.4386
ENSMUSG00000005621	Zfp592	16.7128	15.5919	17.5508	20.4605	19.5444	19.6765	22.8498	19.2811	16.8246	15.1214	12.8023	16.1196	13.9723	15.273	15.012	19.6633	16.3229	14.8619	13.6514	13.9304	13.4198	13.8786	13.5668	12.9739	14.2545	14.213	16.4943	22.8935	10.5222	21.7761	25.0123	20.4837	20.4485	19.3987	19.567	19.949	20.5568	20.9129	18.4621	20.6287	20.2757	16.7087	20.6477	16.093	18.3195	13.8513	15.0088	14.0646
ENSMUSG00000005625	Psmd4	191.98	203.758	195.11	178.222	182.266	179.071	198.48	185.973	165.134	172.196	177.263	187.147	180.63	183.747	198.935	177.668	178.179	186.313	139.385	153.332	157.949	152.728	152.079	165.023	150.398	143.68	156.062	216.451	309.64	206.404	221.998	207.234	212.319	217.381	226.829	199.271	197.813	213.927	202.599	217.064	198.379	212.859	209.398	203.117	211.699	199.68	194.591	192.835
ENSMUSG00000005628	Tmod4	0.223213	0.480634	0.566753	0.313264	0.421	0.188817	0.13335	0.366566	0.464252	0.380328	0.227695	0.245275	0.457329	0.22078	0.300651	0.284921	0.110015	0.646502	0.380117	0.366064	0.410662	0.301173	0.416358	0.396266	0.751392	0.293214	0.274296	0.973348	1.73438	0.612742	0.676318	0.66723	0.505453	0.659028	0.540689	0.366809	0.534971	0.190766	0.207786	0.458825	0.510171	0.642003	0.408216	0.694604	0.59669	0.31544	0.250113	0.388808
ENSMUSG00000005640	Insrr	0.190195	0.231344	0.153472	0.0151649	0.0221398	0.033508	0	0.0111645	0	0.0213606	0.0169096	0.023686	0.00481367	0.0117341	0	0	0.0109336	0.00603439	0.00526637	0	0.00486215	0.0146197	0.0334179	0.0104302	0	0	0	0.0477289	0.117195	0.023534	0.0384115	0.187285	0.0883454	0.0720867	0.0702731	0.101116	0.443887	0.362944	0.291747	0.210323	0.220241	0.169855	0.204757	0.223248	0.172818	0.938928	0.909276	0.636477
ENSMUSG00000005649	Cabp5	0.0532054	0.073913	0.0273926	0.238098	0	0.0589392	0.149088	0.0158551	0.265466	0.0303454	0.0167728	0.0504633	0	0.193874	0.0952714	0	0.0166917	0.0997854	0.0778342	0.132534	0.0821635	0.0298627	0.0801216	0	0.031866	0.0448388	0.111314	0.0818344	0.164148	0.124087	0	0.0571844	0.0720938	0.23038	0.0338535	0.333476	0.0921569	0.0316282	0.0442656	0.0160357	0.0864069	0.0317472	0.0451674	0.0156721	0.0217733	0	0.0272664	0.0133201
ENSMUSG00000005656	Snx6	110.898	127.288	120.665	113.093	120.088	110.831	116.22	121.13	139.586	130.374	130.004	134.268	134.447	135.388	141.783	133.089	134.046	145.985	99.5159	94.6802	98.4007	102.536	97.2505	97.0513	109.741	109.043	97.8659	121.958	139.636	143.776	114.391	125.095	138.262	119.983	125.123	125.469	138.852	139.377	136.296	138.731	126.437	136.186	128.758	120.343	124.544	145.103	140.505	131.878
ENSMUSG00000005667	Mthfd2	38.5724	41.3901	46.1015	28.1932	26.8285	27.3662	30.601	32.0862	30.4551	21.1534	21.1757	22.9182	23.8448	22.6271	24.0831	25.528	22.383	23.495	21.4383	20.0793	20.7622	23.3547	24.677	19.8524	25.3359	20.3473	22.5242	69.7643	74.9049	69.9051	77.9305	73.5053	69.2558	69.353	68.7168	71.6255	50.267	51.8291	50.1572	51.9141	54.0562	57.1514	51.7529	48.7932	54.0424	36.7315	35.5835	34.0716
ENSMUSG00000005672	Kit	37.5137	39.5405	36.0558	18.8549	21.4448	18.7966	18.6563	19.8391	18.789	16.6959	17.3231	15.2057	14.9901	15.5793	15.7903	19.5147	20.7275	17.1416	20.2572	19.5879	23.3451	8.3596	8.80943	9.00935	10.6589	9.62754	10.5811	10.8249	6.15157	7.11213	8.77254	10.7312	8.72325	10.9635	11.3505	10.2726	5.73506	5.20045	4.48268	5.10463	4.87266	4.17032	7.95301	7.68738	7.36889	35.798	38.4463	37.5039
ENSMUSG00000005674	Tomm40l	22.5507	22.814	21.1544	18.3595	20.779	19.3676	23.2729	18.6149	19.6157	30.6532	26.9122	30.3273	31.0165	28.3339	28.3333	29.6645	26.1158	26.3253	23.7172	24.2886	24.7529	25.8483	24.3592	22.3398	24.5708	23.1448	22.9365	22.6701	23.6609	26.2212	28.4345	22.3234	23.2328	24.0961	27.7487	24.3581	29.1564	34.6747	30.1623	32.106	26.4579	33.1707	29.4374	27.8924	29.2991	31.612	28.6487	27.6049
ENSMUSG00000005677	Nr1i3	0	0.0441799	0.0199898	0.0425869	0.0234168	0	0.0121325	0.00943695	0	0.0262768	0.00954116	0.00956243	0.0238659	0	0	0.0176926	0.00948101	0	0.0262107	0	0.019968	0.0178909	0.0259028	0.0187403	0.00954941	0.0505718	0.0201228	0	0	0	0.0129471	0	0	0	0	0.00886668	0.0181862	0	0.0260179	0.018246	0	0.0284212	0.0171523	0.00892457	0.00840999	0	0	0.0155669
ENSMUSG00000005681	Apoa2	1.91419	1.72615	1.5605	2.66747	2.53751	2.85583	2.02005	1.71692	1.65234	0.452551	0.396521	0.601159	0.462066	0.799964	0.286267	0.446797	0.702505	0.409602	0.389221	0.165347	0.306236	0.316413	0.233175	0.760009	0.252111	0.331106	0.190997	1.04404	1.44631	1.45202	1.45453	3.05327	2.6432	2.13693	1.04315	1.29906	0.956218	1.42834	0.911611	0.568207	0.262142	0.877558	1.09228	0.457888	1.12162	1.24398	1.06405	1.0895
ENSMUSG00000005682	Pan2	30.4702	31.0351	27.693	28.8113	30.0618	29.6663	32.3613	28.4831	28.0996	25.4753	26.9829	27.5172	26.8235	27.6625	28.4612	30.0215	28.9853	28.1018	23.4917	24.8186	28.0997	24.1104	26.209	26.0138	27.4767	26.4516	27.6599	31.9251	25.4898	29.7013	31.6703	32.7956	32.3411	32.3644	34.628	31.591	27.7594	27.26	24.7883	27.0984	27.8744	27.6907	28.4391	23.6491	28.752	26.7913	26.7476	25.1557
ENSMUSG00000005683	Cs	245.369	256.978	234.445	198.888	201.116	196.821	238.704	224.688	199.495	212.793	207.075	220.037	200.14	196.86	202.695	205.746	199.986	192.498	201.508	214.616	226.57	210.742	218.899	228.533	199.541	221.3	229.41	249.108	225.039	228.889	238.724	237.735	223.206	250.201	240.91	231.814	191.404	198.77	174.457	202.821	211.457	199.165	204.585	180.775	200.774	229.753	226.826	218.057
ENSMUSG00000005686	Ampd3	4.46527	4.34263	4.13934	0.455935	0.59584	0.561174	1.05913	0.821038	0.8369	1.11603	1.21317	0.575042	1.47879	0.839822	1.07178	0.870606	0.686403	0.927101	1.65574	2.02354	1.75102	1.96735	2.43107	2.31819	2.03646	2.08435	2.19474	2.36387	1.97511	1.70169	4.01143	0.663648	0.84533	0.341849	0.556817	0.416671	1.26016	1.02397	1.01138	0.663761	0.70063	0.663845	1.42972	1.08115	1.05475	5.21746	4.78008	4.41695
ENSMUSG00000005687	Bcas2	174.63	163.181	135.819	176.228	170.427	146.063	176.573	170.51	160.844	170.587	175.3	206.694	205.869	225.804	241.209	202.331	217.697	211.426	156.789	145.713	143.674	171.451	145.971	142.845	173.312	146.233	141.305	194.695	243.899	173.43	222.088	204.708	178.936	195.41	221.804	173.815	195.434	225.543	193.666	213.67	219.444	228.044	205.724	214.884	224.022	187.789	194.724	196.102
ENSMUSG00000005696	Sh2d1a	0	0	0.0104794	0.0654289	0.0710893	0.13358	0.145689	0.121791	0.110959	0.200151	0.0611689	0.0771872	0.346748	0.115287	0.629197	0.80773	0.521605	0.379989	0.354777	0.4539	0.378408	0.23137	0.23449	0.148803	0.41444	0.639896	0.433659	0	0	0	0	0	0	0	0	0	0	0	0	0	0	0	0	0	0	0	0.0310807	0
ENSMUSG00000005698	Ctcf	130.8	138.576	133.564	121.797	129.698	126.415	127.693	137.223	134.534	113.132	116.194	110.922	114.708	111.146	120.472	117.742	118.867	116.785	111.036	108.238	108.961	112.503	115.776	116.51	114.041	117.159	119.696	139.241	110.203	137.278	148.234	143.177	147.668	138.35	153.725	143.103	128.184	120.356	113.75	118.378	126.135	118.32	120.044	103.166	116.887	124.459	120.815	115.343
ENSMUSG00000005699	Pard6a	9.44764	7.07974	9.14036	5.21879	5.29051	5.9424	7.24116	6.12712	4.60948	5.92521	5.83311	6.7498	6.78579	6.0606	6.73972	6.66661	5.65861	6.17122	6.72097	6.67537	6.51329	6.89415	7.39672	6.72269	7.84101	7.42421	7.04032	5.31382	8.79393	5.5309	5.83495	6.45207	5.68707	6.28797	6.57634	5.81097	7.75168	7.94072	7.73034	8.65102	8.70844	9.37773	8.07217	8.12452	8.07866	11.872	11.29	11.1901
ENSMUSG00000005705	Agrp	0.229423	0.14441	0.131931	0.311952	0.198898	0.371162	0.292686	0.101321	0.100018	0.218478	0.276827	0.421762	0.266995	0.109811	0.160455	0.47729	0.476241	0.788843	0.369243	0.335284	0.211771	0.68518	0.6177	1.04989	0.391387	0.317137	0.260848	0	0	0.329442	0	0.0464303	0	0.22304	0.259608	0.144322	0.604678	0.474261	0.273519	0.159143	0.214178	0.206902	0.242792	0.384748	0.141046	0.434697	0.310776	0.267055
ENSMUSG00000005716	Pvalb	0	0	0	0	0	0	0	0	0	0	0	0.0668041	0	0	0	0	0.0331238	0	0	0	0	0	0	0	0	0	0	0	0	0.0340447	0	0.0289382	0	0	0	0	0.0628203	0	0	0	0	0	0.0602205	0	0	0.0897056	0.0276497	0.0269204
ENSMUSG00000005718	Tfap4	41.5768	41.0519	38.4065	39.4976	39.7985	39.1036	42.0033	39.305	39.2105	30.7843	30.9031	31.5139	36.7458	37.8492	41.0515	40.4527	40.2163	42.7582	33.5251	35.2154	39.7778	40.6352	41.0983	44.9816	38.3948	39.11	43.0801	37.3174	28.7937	31.8213	38.5899	36.4286	33.3341	38.9795	42.2145	38.1864	31.2288	34.3747	30.9243	37.3758	34.4913	36.0947	38.2985	37.1279	39.2705	32.185	32.0855	33.2855
ENSMUSG00000005732	Ranbp1	772.267	874.443	834.25	737.993	759.092	773.77	725.512	816.057	879.752	453.281	423.913	446.392	444.997	435.799	484.681	428.172	479.993	451.816	448.547	517.549	412.394	455.541	476.415	544.074	436.49	459.214	499.992	1148.27	1636.21	1213.27	1313.29	1116.41	1266.2	1116.91	1056	1099.39	503.818	544.394	512.986	530.007	521.01	565.545	558.028	539.107	566.736	478.792	477.672	485.582
ENSMUSG00000005763	Cd247	1.59125	1.86671	1.87602	0.720334	0.7176	0.756474	0.304617	0.25615	0.330934	0.495654	0.527896	0.662345	0.393903	0.800168	0.508068	0.157445	0.120173	0.151017	1.14813	0.87177	1.11106	0.334563	0.232956	0.329184	0.0525215	0.184191	0.03739	0.436829	0.594959	0.476472	0.023788	0.166938	0.277386	0.386978	0.660114	0.522582	0.536029	0.370324	0.315328	0.157289	0.0761496	0.109158	0.17905	0.102303	0.234033	4.82993	4.15871	3.99548
ENSMUSG00000005774	Rfx5	12.3038	14.4876	13.7344	13.9327	14.0316	16.1044	11.8449	12.9555	10.9802	15.309	15.9621	15.3796	15.5529	16.4207	14.0883	14.9546	16.742	13.6226	18.4439	17.4178	19.7608	17.6665	18.8687	18.1482	20.1496	18.0316	20.3279	9.71787	9.60024	10.4916	12.1001	11.0711	14.1949	11.4774	11.2132	13.3624	17.0919	15.2211	13.4985	16.428	16.6732	13.2202	15.8736	13.2458	15.0261	13.808	14.2215	13.3344
ENSMUSG00000005779	Psmb4	308.27	276.404	271.623	254.799	248.489	223.573	299.048	263.251	272.896	348.002	315.286	368.911	381.024	358.361	400.761	353.241	335.121	362.814	274.69	294.411	321.069	285.278	292.821	283.514	296.186	295.142	282.922	283.141	446.869	285.202	355.207	305.109	289.008	296.936	307.02	309.463	389.891	459.84	397.482	462.498	418.904	476.89	433.351	426.425	458.385	393.231	395.172	408.297
ENSMUSG00000005800	Mmp8	0.0249386	0.020759	0	0	0	0	0.0448534	0.0333443	0	0.0106347	0	0	0.0287353	0	0.02323	0	0.023388	0	0	0.0208343	0.00963758	0	0	0.0110219	0	0.0105255	0	0.0804469	0.196871	0	0	0.030144	0	0.0481345	0.0236189	0.0521902	0.0535478	0.0887409	0.0310871	0.0674815	0.0105577	0.0222992	0.0422748	0.0549955	0.0517749	0.0416978	0.00957062	0.0374647
ENSMUSG00000005802	Slc30a4	11.6337	11.9845	11.5495	9.49831	9.19822	8.9313	9.09242	9.56842	11.3059	19.3343	20.1946	18.8074	14.5689	13.8117	13.7162	13.9297	13.1324	14.621	20.9349	18.5608	17.2071	17.1696	15.3561	14.5156	18.0806	19.1013	15.0331	13.5547	11.313	15.15	9.9125	13.7489	13.7215	11.9679	12.8481	12.5762	21.7535	19.2873	19.0034	20.0111	19.1237	18.4289	17.8065	17.2045	16.0508	13.8088	13.6267	13.105
ENSMUSG00000005803	Sqrdl	1.43672	1.09123	1.50758	2.17296	1.69233	1.6217	1.65942	2.35535	1.91661	2.04383	2.40046	2.9769	1.52823	1.3305	1.1737	1.70975	1.47704	1.46476	1.88976	1.60805	2.0272	1.8353	1.18128	1.55477	0.934924	1.23883	1.22574	1.48742	2.57475	1.1907	1.36204	1.32969	3.08081	0.961629	3.12836	1.85475	2.33224	2.65448	2.06334	1.80904	1.59711	1.59241	2.95391	2.1813	2.52504	1.57927	1.82838	1.21286
ENSMUSG00000005804	Bloc1s6	57.0363	53.3638	57.0934	54.4233	55.6935	55.2635	57.9465	55.1806	56.1769	57.399	49.8639	53.6652	60.3022	56.0632	63.5067	61.315	59.8886	55.1744	42.4794	48.4896	42.5984	42.6955	42.2215	46.6012	45.9434	49.702	42.0884	49.7637	44.0254	50.1298	40.4759	52.6865	52.246	51.7659	52.4078	48.4012	53.6717	59.1147	47.5231	51.6677	50.5156	52.161	55.3741	46.4643	55.2023	68.3105	64.6198	61.8372
ENSMUSG00000005813	Metap1	41.2211	45.6696	44.0488	39.6905	41.5693	42.4844	41.8044	44.7139	45.1828	40.565	38.5567	41.1839	42.2603	42.5672	40.8184	41.767	40.2302	41.6906	37.2543	36.1117	37.881	36.7677	37.4651	35.6491	38.857	38.3294	36.3738	47.6077	47.0005	47.5467	48.5112	49.0229	52.5239	48.6146	52.9071	51.4252	40.2589	38.6941	37.2222	43.993	39.9082	41.0579	43.023	40.4211	41.5498	42.9174	41.7824	40.0823
ENSMUSG00000005823	Gpr108	14.1968	13.3074	13.45	12.6632	12.5867	12.7388	14.3408	12.363	10.9361	14.6566	14.545	15.3579	15.3261	15.9165	14.6119	13.9627	13.5544	12.8999	14.0608	14.0329	15.707	13.1412	13.1793	14.052	13.6989	14.3813	14.5483	12.5382	11.3671	11.5521	14.9811	10.9188	11.4929	12.2875	11.8804	10.614	14.9887	16.5135	14.5534	15.2571	16.0879	15.4612	14.6714	13.5347	13.1015	15.793	15.4704	15.1993
ENSMUSG00000005824	Tnfsf14	0	0	0	0.0129667	0	0	0.0192257	0	0	0	0	0	0	0.015388	0	0.0819935	0.0452963	0	0.0133701	0	0	0	0.0131841	0	0	0	0	0.184764	0.137377	0.218882	0.0202083	0.120113	0.0901061	0.0315148	0.156183	0.136839	0.373187	0.611307	0.403548	0.524937	0.689679	0.418114	0.387027	0.496294	0.407727	0.0823414	0.012698	0
ENSMUSG00000005836	Gata6	0.169335	0.125196	0.0945026	0.499131	0.746027	0.625134	0.73253	0.761788	0.595986	0.344388	0.327876	0.630531	0.238157	0.193629	0.26234	0.208736	0.352177	0.362064	0.204722	0.133689	0.145506	0.309814	0.287955	0.366029	0.0339235	0.0476905	0.21929	0.294575	0.385199	0.387887	0	0.197061	0.229653	0.444238	0.27497	0.267507	0.282324	0.208936	0.14063	0.279616	0.310383	0.176548	0.175257	0.0828967	0.109396	0.0157146	0.0360708	0.0424007
ENSMUSG00000005846	Rsl1d1	229.479	261.633	250.351	217.751	228.448	214.235	207.265	233.598	268.538	188.03	177.263	187.977	196.174	197.291	213.254	207.347	193.888	206.977	201.636	191.145	186.203	203.609	194.68	195.951	213.1	207.682	188.263	345.293	459.785	372.167	373.421	371.321	405.823	324.67	348.469	344.628	195.818	194.702	187.559	200.786	188.467	198.003	202.219	196.413	210.37	211.564	200.31	197.727
ENSMUSG00000005864	Cnga2	0.029493	0.24806	0.447219	0.0790229	0.0779657	0.0244982	0.0353355	0.0875021	0.0350896	0.0167433	0.027787	0.0278482	0.0678885	0.0460001	0.0365639	0.0503474	0.0644238	0.0473073	0.0493611	0.133811	0.0304089	0.0332013	0.0487908	0.0347714	0.0354444	0.0581361	0.13429	0.0633845	0.0731688	0.0184271	0.144139	0.0237621	0.115588	0.0852844	0.0278251	0.0246693	0.0843147	0.0873533	0.0571566	0.044282	0.124767	0.0263587	0.0832592	0.146684	0.0489931	0.543085	1.376	0.467669
ENSMUSG00000005871	Apc	52.2572	58.8625	54.3656	36.1194	38.5171	37.1199	34.6052	37.7772	39.3968	42.1465	46.8248	38.4572	39.1711	38.719	34.8279	39.1852	39.6237	37.0097	39.7825	36.8258	34.0896	38.7068	40.4857	35.2139	37.4314	38.1956	37.0834	32.5083	13.1008	31.9431	27.4936	31.2384	31.8182	26.7288	29.1646	25.0384	28.3373	24.2516	22.4217	19.983	27.3367	21.0642	24.6663	19.819	20.3133	55.6536	55.1298	47.4387
ENSMUSG00000005873	Reep5	18.9827	20.4506	22.2518	29.4461	25.8782	29.7688	28.3069	28.449	28.4999	45.1778	42.2059	44.5411	46.3196	43.5125	43.6121	44.4017	44.2869	42.6219	50.1838	49.7854	46.6302	52.2667	49.8672	53.2627	50.4131	54.1744	52.4445	49.7827	48.6003	49.9197	32.8442	34.833	34.894	23.7654	23.8634	23.4571	70.7729	71.5346	65.1388	60.2174	53.3002	54.4025	39.7065	36.6736	35.1517	28.7254	28.1047	26.0776
ENSMUSG00000005881	Ergic3	183.943	168.482	172.758	165.287	163.898	173.592	177.262	158.296	143.404	120.74	110.064	140.462	125.841	128.585	141.403	123.461	117.999	119.476	146.35	153.289	168.448	144.893	143.315	145.405	146.19	149.01	157.449	151.3	187.502	140.575	117.034	141.757	139.04	136.505	149.683	131.311	129.833	145.475	115.101	127.737	111.618	133.235	116.64	104.151	116.291	141.521	138.682	138.265
ENSMUSG00000005882	Uqcc1	49.2562	57.8569	53.2585	53.8319	51.3651	47.8612	51.9732	49.6533	57.0647	49.863	45.1557	42.2758	49.312	46.8025	45.2834	49.7699	45.3603	43.2092	40.8274	38.2958	34.9523	41.3337	38.4601	42.956	38.6711	41.5422	35.4593	58.0554	51.202	55.8766	65.0103	59.5874	64.1619	52.2102	47.697	50.2824	48.213	47.0888	47.6941	44.8809	42.1171	46.6867	40.8547	42.4245	42.6449	53.4349	49.2363	47.0693
ENSMUSG00000005883	Spo11	0.885875	0.944801	0.404913	0.84728	1.00229	1.27533	1.89642	0.944148	1.178	2.82974	2.98924	3.21815	3.88422	4.22405	3.89198	3.86585	4.20643	4.68981	6.72044	8.26204	9.86789	9.56768	10.825	11.4096	7.27218	5.37868	9.07168	0.0381178	0.0185366	0.0265754	0	0.0199294	0.0548602	0.0158853	0	0.00689421	0.133915	0.091817	0.0832573	0.0181576	0.0278955	0.0828649	0.079268	0.0145269	0.0479495	1.05843	0.699624	0.901003
ENSMUSG00000005886	Ncoa2	36.857	38.6724	36.3203	38.1884	40.5566	39.1862	40.9449	42.7078	34.5174	36.4524	39.1256	34.8518	33.1368	32.7277	30.9353	36.9978	38.4388	33.6086	32.3568	33.3853	30.9881	28.0368	29.5907	28.1595	27.6308	30.5611	29.7657	23.3888	11.3655	22.6594	28.8305	23.6588	23.6523	29.2384	28.6087	24.5522	21.8552	21.1505	20.1925	22.5815	27.8575	22.7725	24.712	22.9526	23.1917	33.6069	33.7147	33.6586
ENSMUSG00000005891	Prl4a1	0	0	0	0	0	0	0	0	0	0	0	0	0	0	0	0	0	0	0	0	0	0	0	0	0	0	0	0	0	0	0	0	0	0	0	0	0	0	0	0	0	0	0	0	0.034162	0	0	0
ENSMUSG00000005892	Trh	1.31298	1.07273	1.61113	1.24461	1.07338	1.19162	0.0268344	0.0199522	0.0400193	0.15757	0.0218163	0.0426697	0.382904	0.301463	0.318934	0.0190905	0.0211281	0.067029	0.464284	0.14845	0.431824	0.263158	0.0549802	0.117955	0.0199437	0	0.0428505	0.0859467	0	0.0218235	0	0.186024	0.231333	0.132128	0.0439504	0.0955223	0.0802695	0.104165	0.0417359	0.125753	0.0392877	0.0624826	0.0771813	0.195058	0.0757029	0.0957929	0.19497	0.303281
ENSMUSG00000005893	Nr2c2	25.2083	26.657	26.0245	24.231	24.1823	23.8569	25.9716	27.2595	25.3351	29.6827	29.6095	27.8633	30.5537	29.6381	28.1442	30.882	30.0245	28.0087	25.2557	22.5661	21.9586	26.4534	24.9498	21.4539	25.0251	25.3274	23.3703	20.9507	11.7163	22.7832	18.5742	21.8856	21.8285	21.9918	23.5236	23.2396	30.4045	27.7854	25.5466	27.2079	29.2069	26.0454	30.0299	26.3698	28.0473	29.8932	29.7013	25.8947
ENSMUSG00000005897	Nr2c1	21.0873	21.7236	20.058	22.8644	23.131	22.8344	23.9279	23.5532	23.2008	21.3515	21.5373	21.598	20.7051	21.1942	21.6847	24.6308	24.8125	23.2869	17.9879	17.8386	19.0825	18.0509	17.2716	17.5881	18.8132	19.8616	19.6798	13.8536	11.3264	14.6428	16.2287	17.782	17.5308	15.9751	16.185	15.9258	14.5453	13.2471	12.3664	13.8175	13.195	13.1782	12.3889	11.2478	12.2788	22.364	21.3882	20.8261
ENSMUSG00000005899	Smpd4	77.5894	77.7174	68.7671	71.7725	77.1261	78.3856	90.4947	76.9502	67.2322	64.5849	66.7067	67.679	68.5678	69.573	67.4311	69.1592	60.7816	57.2382	64.4543	62.1559	68.4668	68.3513	68.9633	67.5152	66.0491	64.1363	65.594	81.3815	52.7757	75.363	78.4996	79.1935	83.5375	80.4642	80.5468	76.8825	66.3306	70.8009	63.2789	72.2736	73.3042	72.3953	67.2355	59.9339	71.2879	58.8634	56.7816	56.7688
ENSMUSG00000005907	Pex1	8.26868	9.42954	9.03263	7.84611	9.3154	8.55255	8.40164	10.0327	9.74191	6.43541	7.40629	7.62529	7.0026	7.63619	7.50614	7.08043	6.87055	7.61212	8.4497	7.18832	6.69122	7.54318	7.20917	7.11448	8.61603	7.8841	8.21305	9.91236	5.17853	9.7324	8.69164	8.71453	6.97422	7.58334	9.87391	7.41182	9.16177	9.00832	7.20458	8.63225	10.0822	7.92064	8.62193	6.58843	7.72064	7.87597	8.21293	7.38227
ENSMUSG00000005917	Otx1	85.9899	96.8837	95.0883	29.3135	30.0466	35.0755	2.66464	2.98694	2.41453	79.8937	85.2118	62.1538	48.7794	45.5844	39.2359	24.946	22.8176	16.1959	73.2114	84.5563	80.8237	55.9477	56.9061	61.9469	49.013	47.1763	63.1404	0.108928	0	0.211116	0	0.502097	0.10591	0.135745	0.0498547	0.140752	0.101325	0.0574719	0.0669552	0.0688111	0.0361575	0.0288246	0.115532	0.119546	0.166846	74.03	75.6567	85.229
ENSMUSG00000005936	Kctd20	97.7668	102.656	101.344	93.1312	94.9415	99.6704	107.184	104.118	106.057	92.1785	88.0911	94.0123	98.7378	92.5104	99.3155	101.406	96.5511	99.9435	90.0273	79.8659	73.6531	91.5138	87.9798	80.3031	92.5234	92.9363	79.5137	121.322	83.1829	139.82	132.681	122.737	139.134	130.283	124.012	118.389	109.096	110.28	95.1069	117.926	111.392	114.277	113.574	99.5477	112.405	92.6297	87.596	81.3121
ENSMUSG00000005947	Itgae	0.108334	0.0708124	0.113713	0.155574	0.109371	0.115833	0.101919	0.15852	0.179757	0.0461123	0.102028	0.131364	0.11864	0.101347	0.115048	0.14518	0.094042	0.0819708	0.0259263	0.0582372	0.077821	0.117796	0.070649	0.109658	0.0767893	0.0654136	0.0751909	0.021371	0.0360447	0.101473	0.0380203	0.0748046	0.0489519	0.0596133	0.0800626	0.174651	0.106065	0.157995	0.10921	0.139286	0.111236	0.103697	0.0982406	0.0817782	0.122135	0.103427	0.10083	0.0639782
ENSMUSG00000005949	Ctns	11.5312	11.8909	11.5712	11.0417	10.9736	12.0251	10.1764	11.0545	10.7608	13.4153	12.7257	13.7236	11.0832	12.6812	12.7497	11.7859	12.5216	11.7384	11.7332	13.6343	14.2069	10.7183	11.8372	12.4136	12.0647	12.2574	12.9867	10.3302	7.54832	10.1028	13.1766	11.0941	10.4939	11.2214	12.9938	11.4542	15.8092	16.1484	13.7552	14.8142	14.9933	13.0287	15.0498	13.2313	13.4871	13.4914	14.295	13.5673
ENSMUSG00000005950	P2rx5	0.0511819	0.0426075	0.0296546	0.0308346	0.0303213	0.0570127	0.114144	0	0.0306711	0.0291779	0.0322283	0.0121019	0.0244398	0.0119968	0	0	0.0319161	0	0.0285269	0.0279311	0	0.0107915	0.0211471	0.030226	0.0578932	0.0324229	0	0.0235876	0.217172	0.0960101	0.187505	0	0.104383	0.131193	0.0727437	0.117831	0.109915	0.140968	0.170145	0.154183	0.117856	0.153459	0.13045	0.101606	0.0850035	0.149826	0.127941	0.0717695
ENSMUSG00000005951	Shpk	0.474641	0.547508	0.45008	0.49414	0.370764	0.295701	0.465405	0.307408	0.308051	0.523895	0.416886	0.468795	0.521662	0.414146	0.461687	0.525038	0.565888	0.415509	0.369953	0.631051	0.40033	0.55538	0.481681	0.572234	0.534555	0.592172	0.596985	0.437275	0.391145	0.687642	0.421684	0.704027	0.361241	0.426497	0.580911	0.938655	1.13854	1.22741	0.80652	0.874999	1.03161	1.00283	1.23369	0.789328	0.931759	0.682968	0.678598	0.607727
ENSMUSG00000005952	Trpv1	0	0	0	0.018317	0	0	0	0.0116993	0	0	0	0	0.0100813	0	0.0177224	0.00973487	0	0.0126518	0	0.0285725	0	0.0159403	0.128722	0	0.0170085	0.0658137	0	0	0	0.0782258	0	0.0183679	0	0	0.0124372	0.0149084	0.00978338	0	0	0	0	0	0.0662842	0.0584482	0.0108951	0	0	0
ENSMUSG00000005958	Ephb3	30.4821	28.0854	27.3079	33.3592	32.2095	34.8532	47.4841	40.7116	31.2684	39.0441	38.7633	39.9384	42.1316	39.401	39.0902	40.3995	41.7373	37.0849	30.632	37.4347	38.9764	29.9441	35.535	38.0835	30.6526	32.7666	38.8523	39.5536	39.6199	34.1787	34.5839	32.2662	31.2828	36.4914	33.19	30.7323	72.7079	66.8442	57.5451	73.7737	68.7019	65.9583	70.7737	56.2054	59.3049	30.8086	32.3303	28.4723
ENSMUSG00000005968	Tuft1	6.80566	5.81646	6.25704	13.0192	12.1393	11.8092	15.0738	14.5329	14.8011	15.4628	14.4674	14.9495	14.8594	14.3335	14.6443	19.5791	17.1187	17.105	13.1464	12.9877	13.2252	11.8132	11.858	10.9983	20.3718	20.5818	18.1818	2.23262	1.56483	2.35465	1.16883	1.35397	1.64481	1.70627	1.51883	1.63692	3.48084	3.28191	3.27072	1.83509	1.65443	1.84019	2.2762	2.14843	1.7631	8.60469	7.84626	7.5133
ENSMUSG00000005973	Rcn1	102.89	104.511	110.193	137.971	145.48	132.968	112.212	127.055	135.537	164.877	156.236	162.977	156.099	153.93	163.466	149.264	145.768	150.841	148.774	142.018	146.891	140.419	144.152	137.752	152.667	164.743	138.142	111.91	133.227	123.174	107.385	108.415	112.853	100.347	116.286	102.661	165.39	159.618	138.262	137.989	128.602	130.398	118.06	109.956	109.372	129.886	128.398	122.382
ENSMUSG00000005980	Dnase1	0	0	0	0	0.0376306	0	0	0	0	0.0424733	0	0	0	0	0	0	0	0	0.0987491	0.00910476	0	0.0412604	0.0566274	0	0	0.0355601	0	0	0	0	0	0	0	0	0	0	0.0667743	0.00968527	0	0	0	0	0	0	0	0	0.049633	0.0384125
ENSMUSG00000005981	Trap1	72.2184	70.7098	63.9761	64.6652	68.0373	66.2878	76.3554	68.0196	66.8313	62.6013	59.8225	61.1094	62.7018	62.6193	64.737	65.1196	61.02	63.2913	62.9553	63.6759	69.5683	62.8321	65.2686	66.7059	66.0421	67.9281	67.6613	85.2631	81.4624	85.4432	94.3947	86.9112	89.5413	91.8953	95.9289	85.8558	67.6248	72.5216	65.8985	71.235	67.6724	70.624	74.5826	68.6122	71.986	59.7555	58.7676	57.5418
ENSMUSG00000005982	Naa60	58.4658	62.8649	60.4105	49.6441	47.5087	53.2886	54.7049	55.5046	50.5819	49.1036	48.7357	48.604	47.766	46.3512	47.4068	48.8252	47.2663	43.4222	51.0944	49.6504	50.6059	50.9483	49.1262	47.5831	47.1809	49.3492	52.649	63.7686	59.943	66.9414	66.2138	64.575	69.5822	71.5791	62.7798	68.2839	63.8903	62.1747	54.9692	62.5745	58.7961	57.5146	58.6214	53.6302	57.7443	61.2925	59.7266	57.492
ENSMUSG00000005983	1700037C18Rik	4.28483	5.61979	3.52488	4.46104	4.0566	4.19543	4.70006	2.57806	4.426	4.91098	4.96638	4.61013	4.43592	5.0961	3.6291	4.43326	6.14336	4.51707	5.68563	5.40946	4.81154	5.29661	5.04249	4.72079	5.48666	5.02508	6.01447	3.75288	4.40486	4.99073	4.07908	3.89745	1.53953	4.7493	2.72515	4.5458	5.01543	5.12812	6.08659	6.11907	6.10553	6.73173	4.66022	4.52906	5.21062	6.85837	5.66388	6.25578
ENSMUSG00000005986	Ankrd13d	4.89336	4.46712	4.98648	5.34268	5.72409	5.74154	5.52695	3.94679	4.43853	5.66993	5.85714	6.83946	6.29419	5.53774	4.97547	6.29299	5.95061	6.29858	7.59569	7.31509	7.63478	6.33727	5.73125	7.0155	6.68325	8.18166	8.11927	3.22125	2.37143	3.836	2.11534	2.47545	1.97164	1.94323	2.44613	2.23913	4.87349	5.47672	4.77392	5.98616	4.96385	3.90924	5.31707	5.66618	4.67397	6.09925	5.83211	5.29631
ENSMUSG00000005994	Tyrp1	0	0	0	0	0	0	0	0	0	0	0.0109383	0	0	0	0	0	0	0	0.45048	0.939521	0.967026	0	0	0	0	0	0	0.0299903	0	0	0	0	0	0	0	0	0	0	0.00963811	0	0	0	0	0	0	0.132124	0.0766695	0.0542635
ENSMUSG00000006005	Tpr	127.639	138.483	131.455	151.271	158.501	137.939	129.993	141.946	148.984	107.074	132.925	136.524	108.285	115.524	125.636	104.552	109.902	120.029	117.495	127.694	145.571	113.181	132.765	132.898	125.195	107.052	143.635	142.042	197.648	135.177	131.923	150.344	145.537	154.793	161.912	143.439	111.071	118.111	104.073	103.555	137.346	124.703	117.631	98.0682	122.484	93.5342	118.673	121.329
ENSMUSG00000006007	Pdc	0	0	0	0	0	0	0	0	0	0	0	0	0	0	0	0	0	0	0	0	0	0	0	0	0	0	0	0.168997	0	0.0757136	0	0.0432314	0	0	0	0	0.20951	0.160819	0.151725	0.146061	0.0911574	0.0961347	0.114106	0.107444	0.0222201	0	0	0
ENSMUSG00000006010	BC003331	16.9331	20.1306	17.9345	22.1714	28.0102	19.0729	17.3263	18.4626	21.863	19.979	23.1114	21.9297	21.8005	23.1758	20.3579	21.2939	19.6633	20.8592	27.1914	21.0236	24.3799	22.4647	25.5668	23.5425	27.0464	25.5016	23.4458	27.2504	27.9825	23.2206	27.9629	28.0437	22.8571	18.6565	22.0352	23.0463	23.7237	21.0842	22.4575	22.66	22.7811	21.8761	21.5985	20.3264	20.0211	18.6473	15.6577	17.3603
ENSMUSG00000006014	Prg4	0	0.00694431	0.00644993	0	0	0	0	0	0.00726989	0	0.00787606	0	0	0.0458883	0	0.0135842	0.0150084	0.0161223	0.0174109	0.0123425	0	0.0400792	0	0.0182161	0.00730483	0	0	0.201196	0.311554	0.255511	0.0307817	0.362546	0.055087	0.0397954	0.00711522	0	0.128893	0.160945	0.181512	0.374827	0.175051	0.123917	0.0127297	0.0235023	0.0392093	0.0272843	0.0126225	0
ENSMUSG00000006019	Dhx34	15.171	13.6879	13.4765	12.0031	12.2494	13.3249	15.409	13.9701	9.65234	11.2297	11.3911	12.0166	12.0794	12.9657	12.2214	11.6361	12.3513	11.8724	9.46986	9.53322	9.85924	8.61953	9.17895	9.30253	10.0851	9.63574	11.0352	9.34749	9.70878	7.56677	10.3368	9.19714	8.18835	9.23478	8.43372	8.18169	10.4417	11.7757	11.3248	11.0584	10.0049	10.6113	10.0613	10.0199	9.65574	15.2618	15.5942	16.227
ENSMUSG00000006021	Kptn	13.8312	13.9123	12.943	10.9203	10.7847	11.1094	13.5836	13.5394	9.82399	13.6387	13.3792	13.5536	14.3635	15.1947	16.1761	16.4645	14.9996	15.147	13.8345	16.7674	15.7605	14.4223	17.0297	17.7388	17.1915	15.5071	17.3233	11.7279	16.5593	12.4247	16.1665	11.5398	12.4553	13.0642	12.0642	13.7674	18.1787	19.9945	15.5324	20.1232	18.2239	18.5839	21.2775	18.8112	19.5276	17.1428	16.502	16.7605
ENSMUSG00000006024	Napa	102.437	90.3864	91.3051	101.57	96.727	100.483	110.924	96.6782	79.6289	76.8701	74.8089	86.6841	79.4488	82.5959	75.8392	77.3476	75.5285	76.8849	107.311	100.864	111.563	96.4438	103.134	98.3524	89.0172	96.1793	108.575	94.1081	89.467	79.6664	77.1127	82.241	78.5743	95.3987	77.6386	84.1999	80.15	83.3053	74.1125	98.9228	81.5701	79.5796	87.2578	73.744	91.3017	76.0533	76.5986	80.2021
ENSMUSG00000006050	Sra1	76.1143	69.5252	76.5627	77.6568	78.9636	74.6359	89.6521	82.3967	84.6909	81.5149	73.3449	83.2369	91.4625	88.4599	96.3186	86.7754	86.0007	86.698	77.7744	82.592	84.9193	72.7445	79.77	84.9291	76.1179	80.2234	87.1039	58.2554	73.5059	58.447	63.7122	60.2493	60.5587	61.5001	68.443	61.715	78.3463	79.1222	72.4951	92.2336	78.112	86.2297	87.5049	81.5581	82.7596	86.7037	86.7976	89.1558
ENSMUSG00000006056	Calcoco2	0	0.0479954	0	0	0	0	0.0896378	0.0665793	0.0167212	0	0.0334944	0	0.0266854	0	0	0	0	0	0.0155526	0	0	0	0	0	0.0167008	0	0	0	0	0	0	0	0	0	0	0	0	0	0	0	0.0300594	0.0318329	0	0	0	0.0879969	0.0592047	0.0149113
ENSMUSG00000006057	Atp5g1	86.2236	104.722	104.219	78.3541	80.8944	84.1353	106.607	98.4533	79.8158	120.544	114.068	121.695	137.847	129.471	111.111	125.6	122.129	93.3896	98.6374	106.382	98.5825	112.894	107.283	109.868	110.154	109.522	107.623	133.805	180.242	133.57	108.949	112.548	126.066	139.809	104.324	109.268	110.996	125.874	130.803	139.657	122.645	139.001	136.298	145.641	129.901	119.152	111.485	105.947
ENSMUSG00000006058	Snf8	50.2531	49.4953	46.5139	45.9296	46.0521	46.4552	60.3145	50.9828	49.5009	55.0525	52.2001	61.4654	57.4755	57.5943	60.0216	54.9601	52.7598	51.5812	43.2125	48.3442	47.1207	41.3372	45.9651	46.3146	48.2396	44.1312	45.8741	47.8229	66.5686	51.3573	58.4763	51.2175	55.6666	51.127	53.2625	51.2438	49.3885	53.1775	45.4757	56.6574	50.7681	54.2782	53.6472	46.5353	50.9523	54.8352	53.5246	51.6111
ENSMUSG00000006095	Tbcb	131.231	108.636	118.989	106.68	101.795	98.6203	143.673	109.334	91.5448	104.959	98.3796	116.565	112.504	111.17	106.746	103.375	102.301	87.1112	84.4365	86.8581	81.193	82.6339	90.5067	93.1462	85.4789	83.9953	86.0812	119.381	200.46	122.671	140.69	107.885	110.936	124.854	108.352	112.139	137.042	157.086	140.199	170.815	144.587	161.589	143.749	140.067	147.362	135.531	133.371	130.807
ENSMUSG00000006127	Inpp5k	13.2259	12.9762	14.0809	13.3488	14.0837	15.2948	11.9567	11.9777	12.0579	16.3756	15.6071	16.814	15.3917	16.0519	15.0564	14.879	15.7222	15.137	17.2886	16.9774	17.1794	15.9659	17.4834	19.1074	16.4857	16.7802	17.5296	10.3515	7.63526	8.80999	8.77297	10.4536	9.4997	8.98749	10.0395	9.8755	11.4512	11.5959	10.1749	11.4541	10.6066	10.437	9.58189	9.08572	10.2402	18.3425	16.8404	16.02
ENSMUSG00000006134	Crkl	48.9206	49.232	47.1798	48.1601	48.3116	48.6217	52.1208	51.5484	49.0027	52.0788	51.4504	48.9038	55.47	53.9439	51.3336	59.1534	57.3721	49.783	40.4353	41.6877	40.5437	40.893	44.3367	41.8253	40.2154	48.0271	43.8322	51.2025	25.9911	49.9328	47.4356	47.3433	48.5342	49.3849	49.6617	44.7235	63.2212	60.25	51.57	56.7443	63.9213	53.2943	58.9036	52.5091	54.4049	52.2478	51.0241	47.3993
ENSMUSG00000006143	Upk3bl	22.1377	19.1198	19.0196	26.9093	25.3137	27.9105	30.8574	26.9594	23.4215	31.5967	26.3403	31.6255	26.1133	32.3826	30.5144	52.4352	54.5605	49.4994	13.4693	18.1813	17.2284	10.983	9.9992	13.1851	22.236	24.5902	22.9522	0.0534187	0	0.107631	0	0.184727	0.0538012	0	0.116316	0	0.0504643	0	0.0290931	0	0	0	0.0594646	0	0.0577791	28.4134	27.8292	25.2632
ENSMUSG00000006154	Eps8l1	10.3968	11.0147	10.8033	7.76763	8.64999	8.96986	7.88286	6.59706	6.95667	13.7954	12.3796	13.0774	10.3868	10.4716	9.16747	10.2311	10.4208	10.8956	11.6241	12.8188	12.8633	8.96075	10.2121	11.7353	10.6238	10.3927	11.7843	2.76723	1.29644	2.66758	1.02598	1.94775	5.44252	2.09896	1.86721	2.96825	3.9251	2.95126	3.21289	3.19177	3.62325	4.52281	3.1056	2.89899	4.22604	19.0015	16.355	18.0916
ENSMUSG00000006169	Clint1	73.3113	82.5205	78.4963	80.8296	84.2349	84.9096	84.0735	85.5359	85.8695	80.2656	78.1898	83.483	83.0687	82.5803	81.3212	82.19	82.6945	76.2425	75.1171	72.7681	76.4527	71.9579	77.1518	72.8345	73.1097	79.1688	75.188	96.2855	74.7551	98.6424	93.3682	97.5874	102.286	85.1378	92.6258	85.1034	84.999	82.8743	72.9777	84.5745	81.7431	83.047	90.1063	75.3875	83.2942	77.7855	77.1326	73.5758
ENSMUSG00000006179	Prss16	0.760677	1.1887	1.54301	1.19431	0.676126	1.15927	2.4045	1.23145	1.54131	1.17231	1.25618	1.61356	1.15244	1.20499	1.55872	1.71856	1.54632	1.65318	1.47445	0.80213	0.976999	1.40073	1.05575	1.29433	2.14653	1.9606	1.68399	0.131058	0	0.0874404	0	0.113754	0.0638314	0.093837	0.090613	0.114903	0.184336	0.4178	0.322644	0.227277	0.0386473	0.35609	0.238894	0.179897	0.301703	0.788993	0.730528	1.01609
ENSMUSG00000006191	Cdkal1	13.5925	17.5131	17.3423	15.9202	14.9516	17.8512	14.0434	16.2429	20.4172	16.3803	12.877	13.6042	14.8799	13.12	15.4177	15.5677	14.6968	14.9969	14.1734	12.0422	12.6429	13.6023	12.4566	11.9437	15.946	14.8487	12.5571	20.8664	18.2522	25.2724	22.9104	22.2799	19.1175	16.5893	20.2655	20.2886	16.4987	17.006	16.0224	15.8411	14.3939	17.114	16.6875	15.2926	16.3526	15.473	14.9956	13.5465
ENSMUSG00000006200	Rhox6	0	0	0	0	0	0	0	0	0	0	0	0	0	0	0	0	0	0	0.0563794	0.0283243	0.131054	0.0285007	0.111781	0	0.121539	0.0285534	0.0328574	0	0	0	0	0	0	0	0	0	0	0	0	0	0	0	0	0	0	0	0	0
ENSMUSG00000006204	5430419D17Rik	0	0	0	0	0	0	0	0	0	0	0	0	0	0	0	0	0	0	0	0	0	0	0	0	0	0	0	0	0	0	0	0	0	0	0	0	0	0	0	0	0	0	0	0	0	0	0	0
ENSMUSG00000006205	Htra1	18.4239	15.575	13.9123	7.32005	6.87066	6.19244	12.8696	12.8169	10.2935	93.2572	100.273	109.081	38.9589	35.9926	33.0273	44.7866	41.4244	41.5077	122.398	121.707	151.992	94.7785	109.954	104.602	85.4883	97.3261	88.532	0.677943	0.973703	0.824147	0.992779	1.48379	1.38056	1.40039	1.1827	0.595829	1.7135	1.50168	1.33951	2.21732	2.21584	2.37048	2.3724	1.83735	2.24811	5.81328	5.18502	5.87333
ENSMUSG00000006215	Zbtb17	47.2591	42.7115	47.3351	45.3779	46.5503	52.5314	52.3204	46.622	38.6471	42.2105	40.1417	48.2716	48.0573	46.7027	46.0982	48.4596	44.7677	42.0754	42.8452	41.6263	43.6265	45.0547	43.8803	43.349	43.0264	43.4262	42.6264	46.2559	50.2877	43.7897	42.2628	45.362	41.3159	50.5432	46.4624	44.5802	43.217	46.9818	43.5219	49.7806	45.6905	48.1894	44.3256	41.3785	44.1228	44.9937	44.26	41.1972
ENSMUSG00000006216	Clcnkb	0	0	0.0195104	0	0	0	0	0	0	0	0	0	0	0	0	0	0	0	0	0	0	0	0	0	0	0	0	0	0	0	0	0	0	0.299037	0	0	0	0	0	0.0947366	0	0	0	0	0	0.031542	0.15805	0.0098158
ENSMUSG00000006218	Fam131c	3.84025	2.71473	3.08675	1.4666	1.71489	2.08353	1.22253	1.05299	0.686169	1.72493	1.41332	1.63283	1.48146	1.74774	2.09765	1.43454	1.79177	1.3144	2.04883	2.20355	2.50938	0.968254	0.855972	0.737814	1.82281	1.50172	1.81472	0.208718	0.166737	0.169953	0.0275402	0.0546446	0.0412555	0.109509	0.152005	0.0379335	0.487733	0.545037	0.432716	0.348012	0.115083	0.161894	0.211256	0.19995	0.412416	6.83894	6.5906	6.25986
ENSMUSG00000006219	Fblim1	50.6291	47.0757	47.008	79.3507	72.9435	97.5069	111.61	105.44	94.6117	66.8345	61.0188	68.2579	70.4877	67.5331	70.0956	67.8753	75.6419	68.5241	61.1454	63.0331	63.4548	64.4243	63.6461	65.6447	62.3386	64.0145	67.6385	56.6016	40.6272	54.1981	56.5858	44.8304	46.9809	53.4997	48.4915	52.3802	68.7934	70.211	66.4872	73.9521	67.0194	70.4873	85.7058	75.0039	84.078	48.2068	47.2537	47.3042
ENSMUSG00000006221	Hspb7	0.0109496	0.00911094	0	0	0	0	0	0	0	0	0.0103217	0	0	0	0	0	0	0	0	0	0	0	0	0	0	0	0	0	0	0	0	0	0	0	0	0	0	0	0	0	0	0	0	0	0.00909388	0.00914963	0.0252014	0.00822489
ENSMUSG00000006235	Epor	0.808056	0.684855	0.919084	0.382833	0.290298	0.653065	0.195763	0.232493	0.365335	0.515993	0.572035	0.621497	0.443987	0.595478	0.665359	0.361799	0.615036	0.422914	0.544433	0.611099	0.695156	0.688452	0.73821	0.675881	0.526145	0.545628	0.360772	5.26768	5.59374	6.16087	2.7775	3.04381	3.77758	3.3375	3.08633	4.26368	4.95489	5.01024	3.7743	4.52067	4.51448	4.53092	4.29273	4.29566	3.87443	1.17381	1.49983	1.27727
ENSMUSG00000006241	Ccdc159	1.36078	0.924823	1.08287	0.989196	1.09114	1.20142	1.2343	1.46389	1.19584	0.772361	0.734423	0.876123	1.01787	0.869055	1.07716	1.16664	0.770859	1.1939	0.871695	0.679917	0.741859	0.775381	0.603313	0.851111	1.03236	0.741001	0.830587	0.696749	0.541919	1.10104	0.834724	0.758013	1.26139	1.48206	0.703344	0.911904	0.922174	1.42216	1.25139	1.53705	1.47615	1.18105	1.654	1.38955	1.25223	1.31661	1.43313	1.50839
ENSMUSG00000006262	Mob1b	22.4802	22.6237	22.6679	20.3108	20.8929	18.9155	17.3651	18.5979	22.3511	28.2997	28.7659	28.6743	27.0067	26.7941	25.7984	26.1907	26.8952	27.2743	27.0771	24.0696	23.547	25.3163	22.5952	20.8913	21.7039	19.944	20.4728	16.1083	11.9917	20.6537	14.52	18.9466	21.2281	18.5604	19.8526	20.1826	21.2474	18.231	17.801	18.6924	20.934	18.6888	21.2802	18.5444	20.2242	29.8887	30.4701	27.4718
ENSMUSG00000006269	Atp6v1b1	0	0.0135186	0	0	0.0143096	0	0	0	0.0144865	0	0.0306667	0	0	0	0.0151521	0.0138862	0	0	0.0135388	0.0812669	0	0.0273345	0.120535	0.0716723	0.0291707	0.0410395	0.0629206	0	0	0	0	0	0	0	0	0	0	0	0.0269886	0	0	0	0	0	0	0.258019	0.124668	0.134048
ENSMUSG00000006270	Vax1	13.1523	10.1542	10.169	0	0	0	0	0.0558152	0	1.54455	1.9527	2.44708	0	0	0	0	0.0295844	0.0312688	0.849371	1.13395	0.8398	0.0782123	0	0.0273222	0	0	0	0.0899155	0	0	0	0.0259059	0	0	0	0	0.056129	0	0	0.0585829	0.0274049	0	0	0.03029	0.0263211	6.73806	8.65636	10.7237
ENSMUSG00000006273	Atp6v1b2	63.3818	71.7768	68.5553	62.9527	66.3034	65.0726	76.5314	74.4471	73.6018	69.7522	70.483	74.9636	67.5949	66.7695	67.4731	71.2964	70.1561	65.1003	54.8398	58.2853	59.9663	54.1227	56.7233	56.6254	53.9796	58.7393	56.6544	62.7136	53.1747	63.2012	53.0241	63.7531	59.9	63.2127	56.4296	56.8505	67.916	69.0084	57.6792	67.4411	69.926	65.3701	70.3747	60.8151	65.5673	84.2041	83.5846	78.006
ENSMUSG00000006276	Eps15l1	46.5258	48.5758	43.9835	49.7946	52.824	52.0062	54.5426	52.7951	47.0285	43.4734	42.1927	42.3381	41.5149	42.7074	42.4883	44.4472	42.8006	43.4019	40.3487	39.3675	44.5034	39.6759	42.5757	42.3628	40.3777	43.6376	45.2393	47.3618	38.0131	44.2266	40.9653	47.3222	47.7411	48.2513	49.1681	44.4356	44.0703	42.4855	41.583	45.7352	43.9129	44.0303	42.1672	40.1069	41.2563	38.2019	37.7472	37.2328
ENSMUSG00000006281	Tep1	2.16947	1.94461	1.71535	2.76641	3.28179	3.06959	3.25131	3.23099	2.6259	4.41562	4.64003	4.60619	3.76183	4.02496	3.83166	3.84693	3.96512	3.94761	2.80154	2.92443	3.4708	2.31567	2.7863	2.83437	2.45717	2.37482	2.85313	1.97456	1.03415	1.72193	1.81261	1.7212	1.37112	1.60275	1.61594	1.32863	2.38323	2.25698	2.32541	1.6011	2.10596	1.80725	1.40911	1.20763	1.46968	1.91406	1.90468	1.94773
ENSMUSG00000006288	Ttc5	48.6187	42.334	45.6491	42.6612	40.9102	41.765	45.7683	38.1545	39.1858	50.711	50.4778	52.8132	51.2797	51.4135	52.6872	50.0217	47.3179	49.9603	43.5675	42.4159	42.3007	41.9819	37.8054	38.0198	40.2524	36.3086	37.7028	35.7975	36.8869	35.6702	44.2227	38.6365	38.6082	37.7838	37.1255	38.4824	43.4572	48.156	42.9389	46.1065	40.3362	47.0799	43.2591	42.6446	44.8122	61.2618	57.1071	56.3511
ENSMUSG00000006289	Osgep	110.551	82.6477	81.3184	80.5978	101.284	88.6266	110.231	103.546	93.1515	93.5877	91.5334	104.267	100.786	105.509	117.704	98.2221	100.032	112.651	78.8315	88.3957	69.9166	85.0781	83.8904	96.89	88.3949	82.5859	85.6953	90.9977	110.947	90.1722	107.205	97.4315	115.55	103.276	116.373	98.9326	101.445	105.501	104.609	109.462	98.0434	105.793	101.318	95.2094	100.191	93.7586	91.8219	91.2791
ENSMUSG00000006299	Aamp	154.039	142.23	144.682	155.587	162.298	162.42	178.301	158.484	135.351	181.681	171.375	190.719	183.49	181.714	191.661	176.665	169.421	174.122	154.588	166.703	177.703	158.87	168.913	168.295	163.346	160.044	169.474	127.739	130.306	122.703	152.906	124.871	128.427	133.875	149.709	139.809	146.106	152.337	142.826	149.419	133.429	144.781	148.005	144.296	147.585	157.457	157.58	158.846
ENSMUSG00000006301	Tmbim1	4.27304	4.63107	5.01482	4.86848	6.84914	8.6502	10.392	12.2829	6.12167	16.1904	14.3048	13.6541	11.6726	12.9402	9.65815	12.0599	13.1008	10.5132	21.0124	19.943	22.3883	18.1138	16.8664	15.292	22.5797	21.7622	19.4573	8.91732	6.05872	9.44443	4.17213	9.84297	8.49227	8.46635	10.0899	7.51038	7.72398	8.99313	8.38574	6.82538	6.93655	6.46293	7.73933	7.50382	5.75725	5.90466	6.17093	5.55139
ENSMUSG00000006304	Arpc2	219.085	265.443	256.581	279.141	284.635	299.152	281.25	305.276	315.295	305.783	290.572	305.677	314.039	303.695	322.837	313.376	304.234	308.915	350.16	361.974	353.046	353.109	352.802	357.69	319.545	348.805	331.31	313.751	322.214	324.474	269.422	289.833	324.568	294.584	305.084	290.459	241.367	241.358	212.467	235.343	215.979	226.636	236.693	212.524	227.959	227.972	217.275	209.655
ENSMUSG00000006307	Kmt2b	54.8963	54.5812	47.1463	47.4864	57.5269	64.6297	63.3904	53.5421	43.9219	39.1179	41.6969	35.2341	33.2235	36.242	33.1921	37.0206	34.1338	39.3853	41.0281	43.2421	43.0552	40.4392	45.0717	40.9842	42.301	33.2576	46.968	48.2325	18.5061	43.5088	37.5623	41.1876	43.3515	42.5048	42.8459	38.3481	32.627	30.6113	30.2488	30.644	38.7845	29.0085	31.4455	30.322	29.1969	34.5426	35.783	31.789
ENSMUSG00000006310	Zbtb32	0.662113	0.601093	0.862638	0.675505	0.30016	0.430737	0.586999	0.401189	1.04643	0.428164	0.584259	0.778459	0.538858	0.473919	0.522252	0.41176	0.462619	0.7002	0.631224	0.810244	0.897801	0.783312	0.93208	1.23874	0.93261	0.743882	1.02029	0.0372808	0	0	0.0499566	0.0663742	0	0.0497784	0	0	0.0151144	0.0748379	0.0374028	0	0.0706246	0	0.0676159	0	0.0286079	0.745807	0.837948	0.605664
ENSMUSG00000006311	Etv2	0.0638165	0.026598	0.0245096	0.0498723	0	0.077389	0	0	0	0	0.0303685	0.0297031	0	0	0.0296328	0	0	0	0	0.0513087	0	0	0	0	0	0	0	0.208833	0.670904	0.545604	0.116707	0.361016	0.264054	0.275727	0.154302	0.345041	0.0279335	0	0	0.0583101	0.0818344	0.202277	0.080406	0.0602979	0.0262006	0	0.0246179	0.0741752
ENSMUSG00000006313	Upk1a	1.08156	0.961157	1.30349	1.0583	0.700134	0.973603	0.830806	1.0655	0.512557	0.757469	1.23493	2.00525	0.762011	0.782096	1.06753	0.591173	0.541684	0.620511	0.554513	0.692827	0.626509	0.721701	0.625492	0.50338	0.574235	0.317882	0.754163	0.711086	0.225762	0.326189	0.60008	0.337511	0.763967	0.446827	0.282072	0.530328	0.492949	0.400446	0.289644	0.402877	0.356514	0.377939	0.494409	0.532332	0.323104	0.879553	0.605539	0.818689
ENSMUSG00000006315	Tmem147	72.4099	70.133	73.8901	57.799	54.7362	63.4594	69.8065	59.7466	55.1146	64.6072	64.0047	70.3212	72.5443	71.8414	67.6323	69.0769	64.8541	56.4506	60.0499	63.3389	61.1133	59.9209	58.4206	58.3941	56.0747	57.2935	60.1398	47.5056	68.5911	59.8075	48.7082	51.2093	51.1728	52.4025	47.4291	49.4645	62.4432	74.2494	66.055	71.5136	62.7003	63.96	69.4103	66.8584	65.7263	80.1273	77.2448	78.7957
ENSMUSG00000006333	Rps9	2194.44	1807.1	1950.28	1906.29	2071.15	1809.34	2344.92	1956.02	1795.4	2105.94	1839.13	2221.66	2302.21	2325.91	2520.8	2448.75	2388.34	2575.21	2057.89	2210.84	2258.75	1930.15	2198.01	2157.4	2289.13	2238.66	2303.2	1869.62	2708.39	1832.88	2649.29	2000.34	1852.36	2063.09	2328.1	1959.94	1961.58	2267.91	1710.75	2145.32	1908.3	2125.43	2124.31	1989.92	2132.89	2243.13	2260.93	2175.27
ENSMUSG00000006335	Tfpt	34.6646	28.255	29.3462	27.5438	27.6972	30.0028	28.53	25.6622	25.4758	22.7205	23.016	22.8087	26.9575	23.6846	28.9766	24.1053	21.9391	22.6252	31.3102	30.4269	33.4101	26.9582	33.1571	32.8529	28.9865	30.3571	31.4761	24.6894	35.4183	30.8645	30.7846	29.4254	23.2237	27.6197	30.888	30.0261	27.7107	30.5803	24.6844	32.0634	25.8045	27.6249	28.6621	27.3414	27.145	27.7596	25.9272	26.1574
ENSMUSG00000006342	Susd2	0.843019	0.874073	0.771475	1.18656	1.4461	1.43092	1.22424	0.733545	0.74973	2.02189	2.17601	2.45866	1.92479	1.80333	1.63487	1.73119	1.70809	1.82376	1.26361	1.27429	1.4801	0.999816	1.04485	1.23461	1.61749	1.89778	2.0651	0.570823	0.796901	0.504012	0.400696	0.744108	0.712166	0.684336	0.461035	0.439526	0.9377	1.03114	0.507613	0.452888	0.461291	0.462041	0.573966	0.510239	0.581093	0.98985	0.964906	0.819067
ENSMUSG00000006344	Ggt5	0.681388	0.805044	0.520197	4.00345	2.61878	2.36383	3.40851	4.5547	1.96516	1.05643	1.45195	1.08778	1.96566	2.67726	2.93745	4.62189	3.08714	2.10853	0.729352	1.58946	1.24548	1.57634	1.10421	1.09981	3.93492	2.17809	1.91969	0.0561228	0.0375067	0	0.694138	0.148023	0.0565612	0.0421031	0.0773389	0.29226	0.0367728	0.00594991	0.181618	0.012064	0.0535107	0.0539528	0.307612	0.104838	0.107014	1.70424	1.38828	1.37238
ENSMUSG00000006345	Ggt1	6.0591	5.04811	7.07364	13.482	14.7522	14.6209	12.8601	10.1387	11.4657	4.3838	5.17223	9.28685	2.00734	2.41279	3.27284	1.63209	2.06737	3.31824	3.20526	2.99849	2.73843	2.16786	1.55324	1.87407	3.29952	2.40001	2.3815	0.334989	0.549642	0.833722	0	0.434337	0.765554	0.562748	0.240282	0.431545	0.350991	0.329091	0.355084	0.255315	0.146442	0.245887	0.185383	0.367754	0.253448	0.936635	0.629286	0.766916
ENSMUSG00000006356	Crip2	32.6962	30.556	30.5785	36.062	34.6259	37.5155	44.2766	35.4647	32.0871	9.0992	9.86153	12.4424	11.1536	13.1721	12.2708	12.2319	12.6295	11.9444	8.11336	9.36838	7.71282	8.08124	8.14322	7.67285	8.03552	8.65981	9.48086	33.5588	31.2277	28.5669	25.3118	24.1125	22.6379	24.3641	21.0811	20.74	24.5417	28.7541	23.4234	26.9151	22.1401	24.2067	31.2043	26.3489	27.1145	51.4587	49.731	43.5786
ENSMUSG00000006360	Crip1	35.6981	29.1757	28.8546	17.9527	14.9939	15.2169	21.4871	16.0827	17.3089	8.94336	7.18572	12.3217	4.39337	5.7829	7.23965	8.07211	12.0323	11.1963	1.27125	2.33785	2.88659	2.75771	2.03289	1.6589	5.85656	4.59247	3.4996	22.6145	40.9662	28.047	24.378	15.1541	16.5684	13.6276	18.3978	17.5488	33.4082	32.2237	23.2753	43.1829	33.4779	40.4415	33.4231	24.2322	27.9679	40.897	36.8892	33.5641
ENSMUSG00000006362	Cbfa2t3	1.53347	1.42251	1.36476	0.163212	0.152613	0.0529617	0.285847	0.235784	0.200488	0.103374	0.120624	0.146117	0.111306	0.220081	0.136453	0.118116	0.179018	0.0982822	0.17354	0.122717	0.193084	0.191706	0.177281	0.0707876	0.0568483	0.083359	0.220556	4.127	3.03593	4.59995	0.730282	1.46557	1.53223	1.43055	1.3537	1.71841	3.90392	4.18713	4.24463	2.29765	2.76916	1.70922	3.98376	3.43854	3.55309	3.15279	3.60726	2.86534
ENSMUSG00000006369	Fbln1	75.5401	69.5564	66.7862	80.7764	76.432	81.9282	115.782	99.3273	79.4999	107.57	100.37	110.004	124.942	125.711	114.639	116.524	127.847	110.444	116.125	129.049	135.618	125.356	127.739	136.081	105.282	109.216	125.783	115.467	105.112	104.936	120.638	112.121	107.951	134.75	121.156	118.725	150.004	159.492	135.487	178.989	175.775	180.201	191.196	164.537	168.228	65.2847	71.004	65.1925
ENSMUSG00000006373	Pgrmc1	301.268	282.223	299.321	232.224	229.525	217.738	215.854	209.54	226.836	284.707	281.739	312.538	280.889	280.75	287.789	269.107	262.789	281.615	229.463	235.462	233.53	234.484	222.391	240.044	241.452	259.042	239.341	301.063	353.229	313.512	275.241	259.241	278.882	234.554	250.259	231.03	323.813	331.994	288.214	319.13	297.909	337.926	237.697	219.307	246.097	416.97	414.486	393.44
ENSMUSG00000006378	Gcat	60.1389	53.2225	53.0215	52.691	49.5917	56.2074	75.6007	62.1049	52.0789	67.9974	62.8976	70.1158	76.1188	73.2292	73.6714	76.5281	68.2613	64.1817	57.5442	56.3593	57.6123	63.8083	58.3729	61.9764	63.8058	63.3908	59.3616	30.7311	30.4068	30.0129	42.2194	37.3746	35.0537	43.1111	42.0727	37.577	37.2661	42.698	36.07	47.2112	41.9337	50.7211	50.2186	46.9105	48.8061	66.8803	64.5722	60.4885
ENSMUSG00000006386	Tek	0.234271	0.182938	0.340165	2.06863	1.46829	1.68582	1.12834	0.932768	1.24863	0.372033	0.303707	0.40254	0.38835	0.622742	0.73507	0.297203	0.679113	0.43767	0.12789	0.220826	0.137724	0.181105	0.119206	0.0565046	0.0703174	0.054172	0.06691	8.22636	6.72034	9.78596	10.3207	9.56086	9.89205	6.70373	7.4858	7.47027	6.88824	7.42879	5.36772	8.71512	8.34007	6.4476	8.18414	7.10456	6.25948	0.537363	0.465523	0.221126
ENSMUSG00000006389	Mpl	0.0403394	0.0151546	0.0233596	0	0	0.00814782	0	0.0173406	0.0258435	0.0427566	0	0.0168541	0.0137579	0.0373711	0.0167875	0.012297	0	0.0388075	0.0245323	0.00814581	0	0.0149162	0	0.00862155	0.00877976	0.016376	0.0188259	1.12353	0.607917	0.847015	0.308509	0.521729	0.646676	0.46965	0.348723	0.45765	1.02912	1.0081	0.927636	0.97586	1.11359	0.74831	1.10204	0.971092	0.956049	0.083517	0.102977	0.0624783
ENSMUSG00000006390	Elovl1	30.5547	26.8896	29.6734	32.9014	31.0941	35.2924	41.7587	37.9392	36.2292	44.7174	42.1174	47.8105	34.9543	33.7045	31.5048	34.9246	36.2791	32.3115	49.4677	49.6425	52.1526	39.6436	40.8943	41.0881	38.274	41.5035	45.1928	32.1185	27.7675	31.5053	28.592	27.8855	30.822	30.0337	30.5476	28.97	25.965	29.4221	23.7388	28.4408	25.4114	25.9728	29.2055	24.7387	27.3358	25.7724	26.0699	25.9771
ENSMUSG00000006392	Med8	131.779	123.124	120.726	111.18	115.82	112.955	119.662	115.954	122.5	100.971	100.754	102.451	108.522	106.922	109.783	105.407	98.7796	105.838	97.2175	92.7636	95.658	93.7368	102.642	101.285	101.358	99.6262	99.4062	124.324	157.613	127.537	146.579	129.149	131.425	123.913	126.547	124.787	96.0188	95.8698	83.1831	105.662	97.0851	97.2382	100.443	83.9556	99.3485	111.255	107.935	105.013
ENSMUSG00000006395	Hyi	3.53581	3.09592	3.22006	4.05844	4.83137	4.61156	3.82255	4.58485	3.15776	3.62729	4.0115	4.39231	2.97698	3.78873	4.028	5.11626	5.5005	5.28514	4.69481	6.85137	5.32766	4.75826	5.11417	5.43677	5.77825	5.59711	7.45998	4.49915	4.19324	4.15843	3.22109	4.2172	4.40046	4.39314	4.03524	3.88975	5.94264	7.34946	6.3359	8.65319	5.57424	6.65529	8.083	6.54786	7.60025	3.49422	3.18597	3.19436
ENSMUSG00000006398	Cdc20	171.705	171.622	162.52	124.52	126.939	116.291	146.943	129.823	106.753	126.449	132.224	136.26	137.379	141.35	139.67	129.641	134.925	125.976	90.9951	106.713	102.335	109.002	109.963	122.539	111.582	122.239	130.629	184.123	195.943	174.021	189.544	167.674	150.991	170.778	162.761	149.704	183.939	209.699	196.54	215.42	207.412	212.667	169.189	182.588	180.282	175.02	178.249	170.261
ENSMUSG00000006403	Adamts4	2.10255	2.09259	2.4271	1.68503	1.59281	1.58832	0.751649	0.598798	0.643238	1.82474	1.58116	1.74663	1.76088	1.54831	1.61321	0.892084	1.0425	0.906995	1.01559	1.21039	1.18	0.944985	1.01611	0.885851	0.765927	0.755295	0.725969	6.26942	2.80327	5.86417	7.62842	5.96244	5.955	4.44323	5.15319	4.77761	8.88076	7.37409	6.51476	9.96959	9.30263	8.95698	7.71747	5.86479	6.12845	1.89716	1.80141	1.72735
ENSMUSG00000006411	Pvrl4	11.7036	9.47132	10.5549	22.7526	22.6309	23.1074	19.8755	19.4125	16.3507	96.6029	100.279	105.073	69.1621	68.3207	66.5373	73.0651	68.2608	66.1436	86.7037	80.7118	82.9545	73.1608	79.815	77.867	82.1577	83.3658	80.1303	0.0345696	0.094709	0.0615601	0.13762	0.149065	0.0593949	0.0452191	0.0779418	0.0928409	0.0241378	0.0724958	0.0720696	0.0422619	0.06352	0.0754825	0.0708504	0.0826737	0.107579	19.4011	18.7254	18.1549
ENSMUSG00000006412	Pfdn2	201.37	238.294	220.804	216.952	215.58	223.149	216.641	223.817	208.826	131.555	126.865	135.113	133.462	135.324	133.957	131.551	119.169	127.01	147.123	144.921	149.188	156.356	151.979	155.047	144.129	143.542	143.427	237.897	216.606	226.597	254.237	225.902	246.89	224.616	229.915	227.406	113.912	118.416	105.358	120.97	116.542	117.884	122.495	114.136	117.888	146.255	131.304	124.182
ENSMUSG00000006418	Rnf114	145.493	141.952	149.586	144.014	139.909	150.832	145.588	138.357	126.233	121.437	111.136	127.128	133.918	121.692	131.769	135.323	122.519	117.671	99.7464	94.4993	94.8466	107.035	102.926	100.172	100.272	104.635	96.8212	104.239	98.1351	110.109	108.828	102.475	108.039	104.596	98.3593	100.757	99.997	111.968	93.522	107.561	100.533	109.018	95.104	88.3586	100.024	146.274	143.324	140.404
ENSMUSG00000006423	C330007P06Rik	29.635	32.2309	32.1591	32.5281	35.7575	34.1552	29.8838	33.4861	40.0285	36.1376	32.8319	32.9699	38.9429	36.7971	39.1305	36.1779	32.2547	37.0274	33.851	29.5384	28.5458	33.7092	32.6955	29.9378	32.9262	32.4924	27.362	33.4417	25.3204	38.501	29.5883	33.2858	43.7241	35.335	40.1335	37.3218	36.2315	34.0974	34.4011	38.0913	33.5617	41.7049	35.6668	32.5318	36.2132	33.671	32.5868	31.6087
ENSMUSG00000006435	Neurl1a	2.9989	2.23036	2.73061	2.09847	2.23615	2.14739	2.24188	2.24127	1.66351	3.04895	2.98278	2.67575	2.93459	3.28799	3.16879	2.57133	2.69842	2.91424	4.32346	4.36835	4.19541	4.9481	4.55613	4.96409	3.15792	3.07559	3.73219	2.18247	1.66073	1.79168	1.77309	1.82161	1.70565	2.06914	2.25056	2.10089	3.95989	4.58855	3.62399	3.39569	3.13996	3.02821	4.16717	3.85081	4.14115	6.17101	6.11747	5.86319
ENSMUSG00000006442	Srm	117.985	111.113	109.883	83.0921	86.6362	91.4999	127.396	114.188	96.5602	82.7764	70.0426	83.9634	97.2684	92.8094	89.9037	100.854	93.6311	82.4586	84.019	96.4307	83.9474	90.2572	94.8701	89.704	97.1852	94.2792	91.8973	171.355	212.362	171.715	186.594	190.639	186.737	182.814	172.369	171.593	97.2312	111.903	101.426	117.148	93.9727	109.811	139.216	113.638	132.24	98.016	96.4156	94.9233
ENSMUSG00000006445	Epha2	11.0913	10.4005	10.0921	18.7208	19.8178	20.5005	16.5069	14.976	11.762	14.2299	11.1381	21.0812	14.5689	14.2652	17.0941	9.74795	9.09051	9.17035	21.1956	16.9846	21.9468	11.76	10.2406	11.1679	11.4472	10.3629	10.6436	3.68573	2.54115	3.81622	2.59081	2.83366	2.11966	2.50481	2.23623	2.20366	3.99418	3.72823	3.43218	3.07965	2.95503	2.52541	4.28178	3.25337	3.31175	7.07182	7.7927	8.09354
ENSMUSG00000006456	Rbm14	93.3342	92.5735	86.7984	80.2804	74.4893	82.138	90.9349	83.9781	69.7694	63.3016	62.5079	66.5105	66.1767	67.7849	63.4903	65.9875	66.2105	59.2993	57.5557	63.3489	68.435	60.4333	64.9692	66.5638	59.6291	64.3146	71.2758	81.9755	67.1266	70.9528	81.0596	78.5272	69.6364	80.3244	75.2542	75.0783	72.8129	78.0277	74.8365	72.3408	75.9276	77.7061	71.8601	65.3786	70.3204	76.3932	79.3681	78.1215
ENSMUSG00000006457	Actn3	1.93092	1.61215	1.66268	0.5658	0.558584	0.582216	0.453924	0.230123	0.209413	0.687997	0.597646	0.709789	0.889747	0.734411	0.798699	0.463562	0.519835	0.415961	0.759485	0.922425	1.12505	0.726817	0.802241	0.686393	0.385795	0.608898	0.384315	1.11947	0.915768	0.981045	3.95967	1.74385	1.57197	1.60273	0.885995	1.0343	1.80747	1.98474	2.02825	1.09838	0.865841	0.908623	4.1601	2.86636	1.85698	0.84506	0.937391	0.857368
ENSMUSG00000006462	A530013C23Rik	0	0	0	0	0	0.00711816	0	0	0	0	0	0	0.00916559	0	0	0	0.0111886	0.0230008	0.0199557	0	0.00922526	0.0100688	0	0.00757889	0	0	0	0	0	0	0	0	0	0	0	0	0	0	0	0	0	0	0	0	0	0	0	0
ENSMUSG00000006463	Zdhhc24	8.25331	9.19021	9.30714	6.48043	7.54131	8.26034	5.87232	7.11647	6.94141	9.11185	9.01792	9.17914	9.63431	9.2066	8.73573	9.10911	8.35046	8.14624	10.3053	9.84272	12.4036	9.81564	10.6245	11.4007	10.6681	9.11438	10.7335	4.62117	3.95292	3.55035	2.69985	4.91325	5.26544	4.3941	4.83218	4.84617	5.15647	5.64483	4.03239	4.99905	4.89428	5.05871	7.15568	6.01739	5.73389	12.8089	12.5325	11.9365
ENSMUSG00000006464	Bbs1	6.55462	6.03445	6.34405	5.70421	5.36775	5.69962	5.20954	4.89662	4.5128	4.56201	4.58285	4.5369	5.3849	5.68703	5.14135	4.97635	5.34691	5.24041	4.47823	4.74726	4.87064	4.95724	4.93359	4.76268	4.69093	4.9125	5.10717	7.07511	5.11388	7.05491	7.08629	6.2325	5.9278	6.09526	5.59379	5.83312	7.54718	7.88964	7.46482	6.9684	8.03955	7.19301	6.29238	6.32661	5.93826	7.47302	7.72006	7.569
ENSMUSG00000006469	Slc34a3	0.0138655	0	0	0	0	0	0.0161099	0	0	0	0	0	0	0	0	0	0	0	0	0	0	0	0	0	0	0.0112458	0	0	0	0	0	0	0	0	0	0	0	0	0	0	0	0	0	0	0	0	0	0
ENSMUSG00000006471	Ndor1	24.3375	23.0118	23.684	25.8489	24.243	27.4916	29.7015	26.9054	24.391	24.138	24.4155	25.892	25.5929	26.6847	24.2744	25.5492	24.9042	26.1905	24.7453	26.5268	28.8317	24.0799	23.9985	24.283	26.7691	24.9448	27.5992	20.9255	11.7105	17.8396	31.6249	17.9791	19.0305	17.5973	18.2802	19.573	19.0887	17.7145	16.8867	19.1307	18.5643	16.9883	19.5087	17.8891	17.5904	24.0039	23.296	23.2425
ENSMUSG00000006476	Nsmf	39.4836	35.7899	38.4902	32.8192	36.4541	35.6005	37.5266	32.9339	31.9738	26.2722	26.8614	27.1203	26.6164	29.2838	28.7227	28.6877	27.1113	30.2042	25.9122	27.225	26.0678	25.4229	24.2352	24.5996	31.9534	24.8702	28.1143	34.3149	34.6008	33.1195	39.979	32.4076	41.2518	35.457	35.3504	36.3701	51.4835	48.3827	44.0037	44.492	41.5047	42.635	39.2929	36.5441	40.7679	46.8422	41.9816	41.7223
ENSMUSG00000006488	Prl7a1	0.0753515	0.0314317	0	0	0.0651552	0	0	0	0.032759	0.0325246	0	0.035186	0	0.0355556	0	0	0	0.110676	0	0	0.0281572	0	0	0	0	0	0	0	0	0	0	0	0	0	0	0	0	0	0	0.034506	0	0	0	0	0	0	0	0
ENSMUSG00000006490	Prl8a9	0	0	0	0	0	0	0	0	0	0	0.0354083	0	0	0	0	0	0	0	0	0	0	0	0	0.0315966	0	0	0	0	0	0	0	0	0	0	0	0	0	0	0	0	0	0	0	0	0	0	0	0
ENSMUSG00000006494	Pdk1	75.9276	81.1135	78.6185	101.58	106.344	94.7307	95.6587	102.76	110.818	81.7507	84.3245	89.9017	99.9196	102.683	105.35	98.485	101.307	96.5274	86.2311	79.1154	69.5095	91.6877	84.5587	77.8634	94.208	96.4619	77.1724	37.1088	24.34	46.5004	55.176	55.8585	62.8963	45.7802	57.5534	52.0094	28.152	29.1784	28.987	23.0066	25.9509	28.376	28.2328	25.784	29.7389	72.1179	77.3908	69.1979
ENSMUSG00000006498	Ptbp1	583.753	633.128	591.669	579.031	578.739	624.621	680.309	641.358	545.479	507.299	480.62	527.977	523.216	512.931	502.275	533.563	554.807	462.026	504.786	553.57	542.907	512.137	566.989	600.707	456.326	540.983	592.074	599.617	390.498	549.407	473.619	567.225	563.539	632.285	546.376	555.13	473.317	451.831	420.963	494.22	465.625	459.48	478.805	430.921	463.242	499.661	471.471	448.61
ENSMUSG00000006517	Mvd	41.7321	37.0014	37.11	31.2056	33.7903	33.6288	48.4165	40.6903	33.1655	24.4222	21.8499	25.3371	24.1647	24.4116	26.9624	25.6364	25.8619	26.3055	18.447	18.8756	19.3079	21.663	22.041	21.4439	25.5072	23.4245	24.2385	30.5641	36.136	31.2692	39.3468	38.3073	34.8545	39.7737	40.9426	34.738	35.0121	36.303	37.4825	45.0747	38.2705	41.7559	43.34	34.583	39.5818	39.9694	38.8969	37.9246
ENSMUSG00000006519	Cyba	28.2506	23.9695	21.749	27.0236	24.2947	27.1381	31.2972	22.5913	19.5711	26.573	24.7846	29.9967	32.9002	33.6374	30.7451	29.6269	27.072	27.6916	29.3447	30.5623	31.9948	28.5641	32.4715	30.6101	27.7998	27.8403	29.4493	25.492	22.9293	20.3044	13.2539	13.2287	12.0653	14.8012	13.3201	12.4712	29.9735	31.6565	25.9841	25.3493	21.1388	22.966	25.623	22.8462	23.9174	34.4246	30.9426	32.8477
[truncated: 42,595 more rows]
[truncated: 12 more columns]
