# Supplementary material for: An Alternative Splicing Program for Mouse Craniofacial Development
Source: Front Physiol. 2020 Sep 4;11:1099. doi: 10.3389/fphys.2020.01099 (PMC7498679; doi:10.3389/fphys.2020.01099)
Supplement: Supplementary file 2 [file Table_2.xlsx]

## Sheet: Facial_DE_genes_log2FPKM_062620
Common_name	Gene	E10.5_FNP_ecto_1	E10.5_FNP_ecto_2	E10.5_FNP_ecto_3	E10.5_FNP_mesen_1	E10.5_FNP_mesen_2	E10.5_FNP_mesen_3	E10.5_MdP_ecto_1	E10.5_MdP_ecto_2	E10.5_MdP_ecto_3	E10.5_MdP_mesen_1	E10.5_MdP_mesen_2	E10.5_MdP_mesen_3	E10.5_MxP_ecto_1	E10.5_MxP_ecto_2	E10.5_MxP_ecto_3	E10.5_MxP_mesen_1	E10.5_MxP_mesen_2	E10.5_MxP_mesen_3	E11.5_FNP_ecto_1	E11.5_FNP_ecto_2	E11.5_FNP_ecto_3	E11.5_FNP_mesen_1	E11.5_FNP_mesen_2	E11.5_FNP_mesen_3	E11.5_MdP_ecto_1	E11.5_MdP_ecto_2	E11.5_MdP_ecto_3	E11.5_MdP_mesen_1	E11.5_MdP_mesen_2	E11.5_MdP_mesen_3	E11.5_MxP_ecto_1	E11.5_MxP_ecto_2	E11.5_MxP_ecto_3	E11.5_MxP_mesen_1	E11.5_MxP_mesen_2	E11.5_MxP_mesen_3	E11.5_Nasal_epi_1	E11.5_Nasal_epi_2	E11.5_Nasal_epi_3	E12.5_FNP_ecto_1	E12.5_FNP_ecto_2	E12.5_FNP_ecto_3	E12.5_FNP_mesen_1	E12.5_FNP_mesen_2	E12.5_FNP_mesen_3	E12.5_MdP_ecto_1	E12.5_MdP_ecto_2	E12.5_MdP_ecto_3
Cdc45	ENSMUSG00000000028	5.58733	5.62168	5.48814	6.01633	5.86016	6.1066	5.60076	5.55027	5.54888	5.96644	6.17095	6.00032	5.42521	5.48591	5.3774	6.13669	6.07608	6.10821	5.2092	5.1487	5.1617	5.58803	5.6528	5.51291	5.213	5.17152	5.10107	5.51507	5.56151	5.53173	5.22934	5.20861	5.25947	5.57021	5.65332	5.69237	5.35915	5.29302	5.23767	5.11147	5.12146	5.15971	5.2042	5.14738	5.2244	5.16361	5.18754	5.04945
H19	ENSMUSG00000000031	10.7135	10.6035	10.6412	10.7148	10.9393	10.6611	12.988	13.0508	NA	12.6479	12.5144	12.5436	12.5937	12.5461	12.7408	10.6351	10.5323	10.6303	12.5022	12.4651	12.535	10.5698	10.5118	10.28	12.5827	12.485	12.4264	12.7034	12.6391	12.5673	12.0593	12.0084	12.0892	10.706	10.5261	10.3958	10.8899	10.7858	10.7595	12.4207	12.45	12.4237	11.6295	11.5018	11.7459	12.4071	12.5636	12.4285
Scml2	ENSMUSG00000000037	1.90857	2.34019	2.3051	1.92356	1.48201	2.48359	1.77013	2.17051	2.49842	2.32735	2.74365	2.63788	2.09447	2.02414	2.0399	2.19313	2.80875	2.44465	2.49463	2.35777	2.44713	2.8476	2.86986	2.31732	2.33986	2.01302	2.55742	2.61227	2.47623	2.96494	2.0676	2.61757	2.22081	3.01702	2.80529	2.63142	2.2092	2.11242	1.8724	2.18068	2.4621	2.34422	3.09755	2.97588	3.0166	2.63029	2.33573	2.79545
Cav2	ENSMUSG00000000058	1.211	1.28624	1.16561	2.12274	1.86076	2.28361	2.57105	2.59945	2.73477	1.54447	1.8806	2.16879	2.88005	2.7504	3.02263	1.79801	2.40464	2.02532	3.33752	3.02637	3.14915	2.79227	2.44902	2.15604	3.54599	3.62421	3.43976	2.25517	2.15585	2.19064	3.3721	3.3788	3.19102	2.52663	2.35242	2.34826	1.25275	1.31777	0.976768	3.67064	3.73271	3.55128	3.15334	3.26208	2.82941	3.61663	3.67668	3.49125
Klf6	ENSMUSG00000000078	4.00695	4.03156	3.95956	3.84336	3.55327	3.86789	4.32129	4.42571	4.5376	3.75982	3.91656	3.81942	4.47631	4.32631	4.14862	4.0632	3.93135	4.06399	5.06914	5.23427	5.03092	4.34858	4.21055	3.9659	4.62092	4.61639	4.57552	4.18534	3.98438	3.97239	4.31187	4.34495	4.30298	4.62704	4.55165	4.48385	4.03237	3.99367	3.81544	4.6285	4.48695	4.31197	4.57055	4.63944	4.54523	4.55035	4.90981	4.46279
Cox5a	ENSMUSG00000000088	8.0892	7.88882	7.87236	7.90214	8.61171	8.15259	7.819	7.66633	7.95138	8.04349	7.90002	8.04764	7.66601	7.69211	7.48566	7.98057	8.12847	8.17818	8.07749	8.26224	8.34827	8.16627	8.2824	8.23418	8.13626	8.3505	8.32408	8.27606	8.17038	8.35254	8.27726	8.35087	8.35214	8.36883	8.3095	8.5252	8.3446	8.36529	8.31797	7.51336	7.99381	7.18251	7.35526	7.23631	6.8031	7.78774	7.50039	7.87528
Tbx2	ENSMUSG00000000093	3.04153	2.94982	3.04662	7.22281	7.08824	7.14442	1.77997	1.51172	1.69244	6.61699	6.6243	6.47648	1.22447	1.43496	2.06533	7.52756	7.43324	7.37106	0.944233	0.833895	0.841468	7.39013	7.58534	7.46099	1.35123	2.99222	2.53875	6.75796	6.68401	7.01258	1.12012	1.32204	1.20125	8.21722	8.30457	8.34871	2.67353	3.34395	2.52765	0.853045	1.55264	1.03586	7.23963	7.18927	6.95858	0.645341	0.408073	0.468614
Tbx4	ENSMUSG00000000094	0.0434849	0.0599592	0.055765	1.18426	0.990479	0.98567	0	0.0259642	0.0130673	2.00233	1.77047	1.76912	0	0.0257028	0	1.23792	1.18005	0.936425	0	0.0274686	0.0275292	2.07938	2.05489	1.77623	0.0614943	0.118994	0.014091	3.34963	2.98362	3.19973	0.0224087	0.0272866	0	1.63032	1.41004	1.57025	0.0835961	0.139762	0.0753875	0.0720579	0.140546	0.0667176	2.46219	2.32741	2.49458	0.0511667	0.0123724	0.0142143
Ngfr	ENSMUSG00000000120	1.47882	1.39815	1.46541	4.23098	3.85211	4.0696	2.03912	1.66852	1.47059	2.75712	2.81314	2.56665	2.69065	2.78973	2.74437	5.52691	5.27459	5.08243	0.920965	0.866821	1.06661	3.31496	3.3449	3.27917	1.94339	1.82495	1.74323	3.66709	3.39605	3.0951	1.55702	1.7087	1.78015	5.07569	4.94468	4.78547	1.40143	1.58891	1.09271	0.775196	0.801411	0.827354	5.07939	5.1469	5.14793	0.19017	0.781666	0.345111
Wnt3	ENSMUSG00000000125	3.57604	3.49852	3.50353	0.0257867	0.0891719	0.0520001	5.25042	5.185	5.01703	0.0269747	0.0778126	0.0234369	5.16092	5.14726	5.3473	0.163009	0.23086	0.0127178	6.9753	6.91205	6.95798	0.0709092	0.0614238	0.0347708	6.33992	6.35045	6.28727	0.0237276	0	0.0798693	6.88104	6.89518	6.80385	0.0376757	0.103732	0.0496297	2.03544	2.06993	2.2279	7.00276	6.99879	7.06736	0.0646224	0.211149	0.0383439	6.61782	6.80377	6.78496
Wnt9a	ENSMUSG00000000126	2.1862	1.96101	2.2135	0.65442	0.409176	0.884936	3.07839	2.99021	2.81204	0.530117	0.459091	0.470155	2.48128	2.62271	2.63957	0.448252	0.384888	0.248287	3.30388	3.31756	3.48103	1.69537	1.55697	1.39826	2.96496	3.06563	2.97422	2.53911	2.18865	2.15952	3.08498	2.97662	2.97921	1.83314	1.61524	1.4086	1.76542	1.99499	1.98029	3.21929	3.15776	3.05366	2.96517	3.18736	3.0796	2.19685	2.32218	2.48525
Axin2	ENSMUSG00000000142	5.60561	5.49501	5.57826	5.26417	4.59613	5.13945	5.544	5.46656	5.30518	5.86863	6.0043	5.7666	5.76458	5.80075	5.88271	6.16557	5.9433	5.78797	5.74332	5.61451	5.6445	6.11782	6.05828	5.97042	5.51404	5.61652	5.57785	6.24468	6.08431	6.29926	5.88337	5.86911	5.80116	6.66444	6.80316	6.84445	4.88215	4.84529	4.81107	5.63406	5.86661	5.72624	6.21548	6.04577	6.02387	5.16726	5.60329	5.45431
Slc22a18	ENSMUSG00000000154	1.51812	1.65181	1.31121	0.106828	0	1.25494	0.975168	0.877511	0.985173	0.0643813	0.230697	0.483481	1.20453	0.986045	1.20447	0.0708159	0.471439	0.155735	1.5162	1.47252	1.47153	0.575705	0.574064	0.386825	1.54241	1.49729	1.41813	0.732023	0.4159	0.360136	1.40805	1.54159	1.35443	0.464905	0.550004	0.460755	2.74027	2.50435	2.37555	1.83431	1.79736	2.07709	0.861921	0.676716	0.825648	1.82956	1.78097	1.8897
Pih1d2	ENSMUSG00000000167	3.00149	2.84978	2.78526	2.72046	2.58213	2.76788	2.97643	2.88792	2.82912	2.05241	2.27294	2.29425	3.12299	3.00702	2.77832	1.63768	2.60377	2.59567	2.50158	2.33547	2.49747	1.82713	2.17166	1.92143	2.67875	2.52503	2.64088	1.94351	2.13172	2.24914	2.35943	2.7234	2.48243	1.85632	1.94269	2.04442	2.70368	2.75655	2.57358	2.46222	2.40481	2.45021	1.84938	1.64021	2.10288	2.84284	2.39102	2.51447
Fgf23	ENSMUSG00000000182	0.0731394	0.0206938	0.0381194	0.214069	0	0.0232962	0	0.065545	0.0654848	0.619663	0.394138	0.431633	0.0970062	0.0218926	0.0409675	0.420548	0.490786	0.51166	0.0421581	0.0916158	0	0.143386	0.207319	0.157516	0.0212563	0.0233407	0.0475596	0.338966	0.33385	0.348704	0	0.0233266	0.0460039	0.267496	0.234333	0.265053	0.061487	0.0749089	0.108512	0.0207084	0.0612959	0	0.0383859	0.121619	0.25122	0.0871946	0	0.0240374
Ccnd2	ENSMUSG00000000184	7.06739	7.21874	7.23197	7.63295	6.83494	7.60733	8.92266	9.07339	8.97074	7.29629	7.23349	7.24334	8.8837	8.8662	8.88696	7.64551	7.68831	7.59973	9.01677	9.00061	8.88122	7.65324	7.59636	7.44553	9.06004	9.05325	8.86977	7.47824	7.44697	7.38661	9.15264	9.19639	9.15396	7.51524	7.63952	7.38904	7.05167	7.03654	6.89408	8.92505	8.8386	8.83228	7.42012	7.42701	7.18464	8.31847	8.47185	8.38672
Gpr107	ENSMUSG00000000194	4.795	4.65903	4.59399	4.26276	3.79238	4.30283	5.22702	5.22666	5.1478	4.48658	4.39157	4.23377	4.98868	5.0077	5.09921	4.04808	4.17867	4.53888	5.18812	5.17542	5.05713	4.71707	4.69496	4.51557	5.38862	5.35004	5.23679	4.7256	4.45135	4.36342	5.23652	5.339	5.32052	4.63843	4.58813	4.40961	5.08058	5.00348	4.88792	4.7263	4.71974	4.76039	4.56497	4.70641	4.37331	4.86518	4.85227	4.67554
Nalcn	ENSMUSG00000000197	1.15788	1.17699	1.32204	0.047543	0	0.0691746	0.182381	0.228794	0.243979	0.0747646	0.0833629	0.101279	0.223023	0.182224	0.244535	0.0959437	0.041392	0.0611307	1.23923	1.2756	1.24537	0.0729566	0.0509716	0.0561841	1.05536	0.799774	0.781515	0.106775	0.143676	0.101097	0.883226	0.73975	0.52827	0.129658	0.0718113	0.0662375	1.31924	1.35204	1.19584	1.2994	1.15262	1.22117	0.209754	0.277513	0.172764	1.20985	1.45041	1.41835
Btbd17	ENSMUSG00000000202	4.14372	3.67853	3.83387	0.439028	0.763881	0.853355	0.144856	0.208952	0.208205	0	0.0913123	0.0214115	0.388497	0.338832	0.702157	0.621207	0.766818	0.14451	0	0.160037	0.0473372	0.0817368	0.0824004	0.156191	0.0213861	0.470575	0.0908758	0.542267	0.446428	0.608825	0.0765521	0.168085	0.0672794	0.171031	0.180961	0.0463173	4.6076	4.78023	4.6158	0.0208991	0.0414191	0.0212932	0.176587	0.43923	0.371372	0.0932878	0.0415965	0.0846467
Th	ENSMUSG00000000214	2.44475	2.29674	2.19715	0.466267	0.390406	0.369528	4.65065	4.47818	4.27676	0.180782	0.0926829	0.134266	3.91636	3.93793	4.08169	1.16788	0.243894	0.0880902	2.05426	2.08998	2.51295	0.0313715	0.147034	0.0852539	2.33025	2.67043	2.46519	0.043973	0.0459062	0.0965146	1.54431	1.94624	1.87379	0.0327441	0.0306987	0.0325207	1.07309	0.951238	0.844014	0.321989	0.283851	0.265709	0.346005	0.228568	0.0795581	0.100134	0.166335	0.294718
Scnn1g	ENSMUSG00000000216	0.861529	0.696793	0.766722	0	0.0134719	0	3.18537	3.23874	3.02292	0.0277852	0.0539126	0.0241409	2.08499	2.14464	2.37544	0	0.0232589	0	2.66712	2.69892	2.78772	0.0124276	0	0	2.0802	2.18313	1.85649	0.0244403	0.0127683	0.0120353	1.86056	2.14009	2.23131	0	0	0	0.214235	0.282863	0.268507	2.56562	2.3639	2.54868	0.0446875	0.0603596	0.019876	1.94304	1.90106	1.97038
Drp2	ENSMUSG00000000223	0.821384	0.820151	0.727083	1.5061	0.861122	1.44387	0.951036	1.00011	0.860423	1.13117	1.18101	1.17437	1.00118	1.0021	1.03037	1.15974	1.15358	1.29209	1.20096	1.09912	1.04114	2.85517	2.66832	2.4754	1.54253	1.52186	1.31752	2.54467	2.32496	2.34174	1.61298	1.62856	1.4304	3.01508	2.86953	2.73782	0.980527	0.934739	0.775834	1.77542	1.615	1.63915	3.2993	3.28554	3.35895	1.43803	1.59641	1.64342
Tspan32	ENSMUSG00000000244	0.0667066	0.0515696	0.105107	1.76743	2.24145	2.21049	0.0404919	0.0274716	0.11712	1.65851	1.21509	1.37959	0	0.0590502	0.0280893	1.76259	1.25396	1.94528	0.0290122	0.195317	0.0870496	2.25439	2.26233	2.01574	0.0290128	0.0289227	0.0619629	2.34665	2.11315	2.13613	0.0261109	0.114053	0.404208	2.26392	2.17071	2.06139	0.361734	0.257403	0.227841	0	0.0997526	0.194831	1.41571	1.09611	1.00426	0.0561319	0.107199	0
Lhx2	ENSMUSG00000000247	6.48275	6.27417	6.47172	2.83739	2.9187	2.72379	0.189849	0.484306	0.328502	3.42602	3.19995	3.27941	0.473351	0.431384	0.589423	3.57027	3.32394	3.09625	0.27164	0.223164	0.734392	0.71543	0.834503	1.09364	0.290751	0.324352	0.140944	1.46494	1.55998	1.78844	0.516294	0.359661	0.351913	1.01873	0.537126	0.655238	7.82019	7.69488	7.56512	3.60027	3.69901	2.74074	2.40282	3.43265	2.15604	0.799192	0.59899	3.4453
Clec2g	ENSMUSG00000000248	1.68336	0.467311	0.841479	0.769892	0	0	0.63601	0.775495	0.618287	0.20432	0	0.471969	1.3865	1.21875	1.23643	0	0	0	1.23895	0.819344	1.23602	0	0.354828	0.167522	0.848409	1.56626	0.377745	0	0	0.16546	0.972243	0.810362	1.03618	0	0	0.183138	0.820453	0.955551	0.635156	2.12991	1.55303	2.1156	0.35825	0.361499	0.659536	1.46341	1.94833	1.7973
Gmpr	ENSMUSG00000000253	3.75257	3.63652	3.49708	4.16348	4.37267	4.02838	2.1224	1.87955	1.88422	3.39268	3.49214	3.64048	2.11805	2.06855	2.23277	3.67373	3.46518	3.57221	2.38406	2.17747	2.21306	3.98805	4.05936	3.85982	2.51614	2.36548	2.20277	3.9447	3.8006	4.01115	2.31867	2.27662	2.33714	3.95585	3.75599	3.99002	4.59504	4.58654	4.39047	2.78925	3.09355	2.80604	3.64047	3.74129	3.7367	3.635	3.5401	3.63106
Mid2	ENSMUSG00000000266	3.10496	3.02725	2.97938	1.70737	1.31675	1.69846	3.84816	4.00192	4.01156	1.81106	1.8296	1.96039	3.40816	3.45804	3.36731	2.09356	1.82511	1.97256	4.37612	4.35562	4.26505	1.84268	1.6319	1.48003	4.05142	4.00431	3.77872	2.22379	2.10449	2.29892	3.72255	3.72016	3.73198	2.2552	2.36155	2.13864	2.76683	2.71271	2.57705	4.28257	4.13971	4.04687	2.25193	2.19166	2.14567	4.49602	4.35009	4.33864
Trim25	ENSMUSG00000000275	2.83379	2.73675	2.69455	1.78198	1.56488	2.01976	2.11939	2.00844	1.92748	1.26741	1.33503	1.5981	2.21718	2.2769	2.17851	1.52347	1.47853	1.43883	1.84478	1.81319	1.90836	2.10346	2.16293	1.93503	2.2487	2.28891	2.18994	2.06805	1.91755	1.78054	2.00711	1.99625	2.02987	1.89348	2.0347	1.78031	3.49165	3.40576	3.37311	1.78632	1.98227	1.87631	1.88353	2.01175	1.83347	2.10389	2.21214	2.18992
Scpep1	ENSMUSG00000000278	5.00849	5.03525	4.99823	5.4066	5.45276	5.49789	4.82126	4.72992	4.80106	5.34962	5.43451	5.37652	4.84631	4.99789	4.90738	5.42362	5.42407	5.42744	4.69275	4.5872	4.79066	5.80458	5.81095	5.67021	4.73462	4.65387	4.83318	5.48109	5.27769	5.42716	4.71212	4.69149	4.7908	5.62264	5.53922	5.61729	5.09792	5.0593	5.13391	4.41565	4.4291	4.56538	5.52111	5.60042	5.73608	4.39867	4.41189	4.49548
Mnt	ENSMUSG00000000282	4.86812	4.90778	4.85768	4.47513	3.48184	4.09365	5.14127	4.9935	4.43809	4.39832	4.37464	4.1721	5.05007	5.06568	5.45319	4.72478	4.32199	4.12869	4.78774	4.72759	5.07135	4.31879	4.18965	4.20851	4.88108	4.85811	4.70157	4.30203	4.05014	4.36576	4.76566	4.91781	4.89859	4.28272	4.25546	4.29	4.6445	4.64083	4.71172	5.09287	4.83988	4.80145	4.75371	4.51443	4.38816	4.70836	4.82208	4.71007
Itgb2	ENSMUSG00000000290	0.172534	0.081383	0.136741	1.39655	0.691933	1.00373	0.38339	0.401644	0.305404	0.514833	0.56073	0.791437	0.460186	0.479242	0.577616	2.25234	0.611171	1.23003	0.131204	0.1922	0.220774	1.25888	1.05757	0.722407	0.212694	0.222614	0.197787	0.879772	0.879268	0.692831	0.172409	0.222242	0.257095	0.928946	0.789149	0.881526	0.194492	0.237897	0.126449	0.159172	0.120896	0.159264	0.989174	0.797838	0.74169	0.0746234	0.0825352	0.10295
Tpd52l1	ENSMUSG00000000296	3.1424	2.87276	3.15676	4.50985	4.84154	4.49941	4.42931	4.28988	4.44981	4.48444	4.41748	4.36629	4.13482	4.26523	4.08031	3.94303	3.83254	3.89096	3.85585	3.62577	3.80356	4.67221	4.61383	4.58272	3.74411	3.59221	3.87303	4.44647	4.336	4.45624	3.87747	3.7513	4.11818	4.43038	4.18369	4.65675	2.31937	2.438	2.27869	3.67922	3.54063	3.70729	4.65075	4.61874	4.48837	3.32824	3.51445	3.3401
Pemt	ENSMUSG00000000301	2.71518	2.60038	2.91458	2.58731	3.50227	3.05574	2.95483	2.98776	2.71396	3.17947	3.05462	2.6772	2.39908	2.52535	2.76418	3.40954	2.96399	3.06605	2.21508	2.14914	2.07755	2.46005	2.97617	2.84893	2.13202	2.31085	2.47667	2.51067	2.83598	2.77179	2.23494	2.60388	2.23338	2.17761	2.40403	2.6474	2.81799	2.71401	2.80565	1.87948	2.05778	2.5118	2.57634	2.34666	2.44246	2.35469	2.51049	2.41074
Cdh1	ENSMUSG00000000303	6.71717	6.72969	6.61239	0.228444	0.0855833	0.42746	7.34094	7.37126	7.22949	0.0621155	0.0987226	0.0629749	7.20257	7.23701	7.20811	0.134753	0.924402	0.179987	7.99533	8.11948	8.11082	0.31024	0.32045	0.304858	7.77626	7.79	7.74623	0.158219	0.0903529	0.512915	7.58822	7.54906	7.56504	0.175035	0.161537	0.0938475	6.81259	6.78769	6.74861	7.50318	7.66886	7.8276	1.6053	1.51126	1.69309	7.47756	7.64215	7.69905
Cdh4	ENSMUSG00000000305	2.65504	2.52618	2.46209	1.35899	0.883447	1.06692	1.88761	1.89501	1.44231	0.976079	1.32078	0.960965	1.24605	1.38167	1.26341	1.84811	0.864623	0.931095	1.08494	1.10223	1.24756	2.39775	2.01675	1.85901	1.79144	1.91493	1.56698	2.4655	2.12931	1.98472	1.20697	1.13957	1.09123	2.50246	2.31702	2.25804	2.83832	2.74619	2.76747	0.937572	0.956032	1.12628	2.33612	2.52075	2.56205	1.095	1.31308	1.22676
Ckmt1	ENSMUSG00000000308	4.82078	4.70362	4.82204	1.39724	2.27808	1.05283	1.48074	1.88788	1.68076	2.06039	1.92764	2.04615	1.83764	1.87657	1.93583	0.978923	0.66264	0.360818	1.51403	1.61603	1.54763	2.06201	1.94285	1.85868	1.51731	1.77515	1.49591	3.61367	3.1552	3.36996	2.20103	1.97192	1.93822	2.81974	2.56533	2.46921	6.77539	6.65679	6.41027	2.00424	2.27984	2.15912	2.47911	3.09867	2.48035	2.41689	2.62425	2.52327
Bcl6b	ENSMUSG00000000317	0.48406	0.421894	0.542428	2.93929	2.71207	2.82175	0.325416	0.394875	0.330262	2.40969	2.3626	2.54182	0.372627	0.581014	0.358368	3.00806	2.80591	2.9333	0.297463	0.460657	0.310862	3.0252	2.88538	2.74504	0.404243	0.344176	0.323783	2.90855	2.6944	2.7172	0.491729	0.386137	0.442392	3.07075	2.92899	2.82161	0.699005	0.914902	0.455549	0.553113	0.558119	0.602433	3.08002	3.09303	3.09817	0.586558	0.368026	0.526026
Alox12	ENSMUSG00000000320	1.91685	1.83039	1.56565	1.59739	1.29943	1.61853	2.44923	2.51429	2.33882	0.811601	0.702982	0.833833	3.75069	3.72195	3.68308	1.05987	1.10893	0.85278	3.27039	3.09084	2.88981	1.88806	1.90385	1.8258	3.07581	2.89663	2.74575	1.96562	1.74017	1.6602	3.2861	3.40602	3.51531	1.87461	1.85552	1.76133	2.63587	2.42138	2.3738	2.80144	3.05955	3.07621	1.69365	1.70733	1.76361	3.35647	3.50875	3.388
Arvcf	ENSMUSG00000000325	5.84846	5.67221	5.72658	5.26236	5.10678	5.17427	5.93642	5.92485	5.57207	4.72967	4.75972	4.64858	5.75573	5.79351	5.83347	4.70869	4.58051	4.36666	5.75452	5.81492	5.88355	5.12159	5.30416	5.05964	5.86093	5.98137	5.83176	4.74064	4.68493	4.75788	5.70228	5.79798	5.75789	4.96727	4.94677	4.94754	5.72698	5.76974	5.77544	5.48061	5.52054	5.54458	4.73479	4.80829	4.86522	5.5128	5.32209	5.52356
Comt	ENSMUSG00000000326	5.77067	5.47435	5.59583	5.56479	5.36387	5.44915	5.97411	5.79776	5.44345	5.0072	4.85773	4.88352	5.60746	5.47657	5.6505	4.89603	4.7858	4.69977	5.29402	5.15461	5.37928	5.15777	5.17107	5.06815	5.53154	5.41981	5.33739	4.78883	4.77417	4.75209	5.05271	5.05026	5.09717	4.8798	4.64836	4.7527	5.38212	5.38522	5.3709	5.18738	5.30035	5.32144	5.37326	5.34238	5.50825	5.16691	5.29934	5.40356
Rtca	ENSMUSG00000000339	5.92041	5.97762	6.00329	6.18845	6.4177	6.10224	5.8885	5.79944	5.81932	6.25917	6.25	6.19619	5.56247	5.70198	5.67534	6.2992	6.20248	6.34279	5.42052	5.46188	5.53668	5.93205	5.95616	5.88312	5.57208	5.61437	5.52521	5.98779	6.01179	5.99767	5.55282	5.58131	5.60139	6.00028	5.97345	5.96047	5.93613	5.92376	5.91124	5.28909	5.30933	5.05516	5.6148	5.73768	5.5082	5.3763	5.35877	5.28705
Dazap2	ENSMUSG00000000346	7.5675	7.69061	7.66208	7.15718	7.2521	7.1943	7.63519	7.68658	7.71336	7.38944	7.39303	7.39383	7.52975	7.47944	7.56261	7.14832	7.30269	7.36699	7.83412	7.76301	7.88449	6.88341	6.99505	6.80034	7.77599	7.79101	7.78219	7.04858	6.897	7.08914	7.76623	7.73566	7.83038	7.04194	6.9743	7.09156	7.7224	7.69936	7.64637	7.87202	7.83635	7.92417	6.7254	6.90076	6.879	7.72314	7.87574	7.81999
Ccm2	ENSMUSG00000000378	5.55649	5.40734	5.56463	6.06565	6.02946	6.14658	5.88769	5.65978	5.43209	6.15204	5.93107	5.81341	5.3953	5.47093	5.5603	6.21212	5.87011	6.01599	5.24146	5.1078	5.36863	5.72879	5.96142	5.7648	5.25593	5.19729	5.13821	5.96645	5.81095	5.94088	5.26819	5.27843	5.17063	5.91914	5.86656	5.88039	5.32581	5.21346	5.12116	4.85183	4.87313	4.60954	5.25922	5.41017	5.28806	4.63512	4.57556	4.65618
Tmprss2	ENSMUSG00000000385	1.34974	1.22006	0.982687	0	0	0.062138	1.54937	1.22598	1.48352	0	0	0	0.904626	0.932082	0.77284	0	0.0322102	0	2.32378	2.12393	2.19659	0.0230902	0.0120469	0.0120861	1.99927	1.83541	2.00205	0.0111831	0.0372601	0.021969	2.06147	1.9453	1.76077	0.0121164	0	0	1.42447	1.30193	1.2977	2.21193	2.06907	2.08674	0.0615565	0.067189	0.0545221	1.64197	2.05393	1.89448
Fap	ENSMUSG00000000392	0.379003	0.366626	0.74816	3.88148	3.83477	3.87554	0.0831874	0.236512	0.458907	1.27644	1.13245	1.28266	0.129203	0.319557	0.0875457	2.48385	1.96835	2.71247	0.399702	0.453901	0.491581	4.02141	3.82074	3.70201	0.249534	0.204424	0.230428	2.19582	1.87548	2.00425	0.343305	0.324793	0.236621	2.76805	2.55279	2.64663	1.69748	1.66737	1.48353	0.25607	0.392831	0.334009	3.13243	3.26428	3.14217	0.417044	0.263216	0.587674
Egfl6	ENSMUSG00000000402	2.11985	2.0525	2.07654	0.653721	0.373796	0.563665	3.50481	3.67601	3.77116	0.655773	0.529475	0.585117	3.57809	3.67571	3.69156	0.475621	0.33063	0.514049	3.32044	3.23106	3.27177	3.11436	2.89072	2.68771	4.39021	4.43498	4.16048	3.34212	2.91844	2.65842	3.46093	3.46908	3.54009	3.41557	3.06895	2.64248	2.11101	2.00168	2.02401	2.99127	3.2614	3.23625	5.35422	5.34814	5.59103	3.73883	3.78351	3.75196
Lck	ENSMUSG00000000409	4.7461	4.52842	4.76258	4.41728	4.15368	4.42833	5.08574	4.88406	4.9492	3.16132	3.60208	3.38452	4.97018	4.94901	4.99325	3.47192	3.53314	3.79058	4.78354	4.76633	4.67802	4.21973	4.45229	4.07593	4.49791	4.36859	4.50535	3.5274	3.25837	3.27846	4.84048	4.81886	4.90608	3.38897	3.40276	3.54406	4.1171	4.04667	3.93442	4.90097	4.76781	4.75911	4.06179	4.16594	4.22367	4.6866	4.88138	4.83124
Cttnbp2	ENSMUSG00000000416	1.6694	1.48821	1.47334	3.06567	2.98099	2.73052	2.21804	2.30002	2.50629	2.4485	2.63622	2.45646	2.20572	2.34912	2.30225	2.39273	2.30769	2.09522	1.92159	2.05118	1.69344	2.73854	3.03663	2.70494	2.10821	1.95337	1.93687	2.75518	2.58165	2.56745	2.15158	2.12166	2.02077	2.22921	2.56359	2.0735	2.01453	2.35878	1.93845	2.48361	2.28099	2.30725	3.06185	2.90695	2.95436	1.81199	2.3133	2.16826
Galnt1	ENSMUSG00000000420	6.1396	6.18973	6.10696	6.58562	6.43826	6.73098	6.18783	6.15833	6.21348	6.47992	6.64328	6.52086	6.02452	6.14556	6.01621	6.91868	6.60963	6.76956	5.86865	5.85841	5.88892	6.4612	6.38997	6.21085	5.98796	5.88578	5.9257	6.3079	6.15197	6.22113	5.91149	5.94523	5.95279	6.16406	6.12468	6.12393	6.17726	6.19831	6.0449	5.7925	5.72559	5.5522	6.31364	6.32256	6.01515	5.65325	5.72608	5.46982
Myf5	ENSMUSG00000000435	0.0415025	0.0345201	0.0161008	0.804875	0.731983	0.779963	0	0.0358485	0	1.70694	1.40556	1.77647	0	0	0	0.651586	0.730742	0.744081	0	0	0	0.578709	0.773954	0.507748	0.0343586	0.0190726	0	2.52169	2.49813	2.05486	0	0.0194355	0	0.245062	0.103655	0.0740902	0.101146	0.251449	0.23969	0	0	0.0157271	0.360106	0.305427	0.486229	0.0181801	0.0169708	0
2019-09-01	ENSMUSG00000000486	3.23565	3.47983	3.4111	3.27624	3.59862	3.47137	3.30319	3.14855	3.20228	3.09153	2.93089	2.86748	3.3545	3.28034	3.63544	3.26092	2.9168	3.12236	2.89523	2.75161	2.75912	3.12094	3.51764	3.5342	2.85273	2.60753	3.20843	3.01334	3.0029	3.28484	2.83802	2.90707	2.9778	3.05425	3.18448	3.1813	3.12596	3.17954	3.15224	2.59432	2.53626	2.69276	2.92778	3.23357	3.24277	2.33495	2.43281	2.50809
Pdgfb	ENSMUSG00000000489	0.704205	0.785231	0.832514	2.97787	2.82324	2.88533	1.13848	0.931805	0.769156	2.79488	2.54184	2.58993	1.15025	1.13029	1.10861	2.88164	2.52534	2.46029	1.57035	1.57788	1.82304	3.08859	3.15277	2.91211	1.04435	1.1553	1.24912	3.03668	3.00593	2.8959	1.22778	1.14612	1.03517	2.93456	2.88738	2.74696	1.18765	1.25383	0.848928	1.42616	1.35493	1.32373	2.933	3.03539	2.98262	1.0976	1.09024	1.37918
Acvrl1	ENSMUSG00000000530	0.292597	0.433401	0.337478	3.7758	3.34747	3.89813	0.779266	0.297811	0.331844	3.64503	3.66225	3.51971	0.251368	0.177524	0.364141	4.19682	3.32553	3.42227	0.548781	0.434848	0.334056	4.11468	4.13188	3.8112	0.673262	0.857667	0.797364	3.9454	3.69825	3.55105	0.403965	0.429819	0.482614	3.6441	3.58394	3.46991	1.13406	0.956886	0.47084	0.990735	0.933742	0.859525	3.65275	3.83945	3.78059	1.17838	1.43147	1.31655
Grasp	ENSMUSG00000000531	4.92224	4.73946	4.61862	3.31095	3.18275	3.40061	2.7589	2.73512	2.68947	3.47794	3.42991	3.42297	3.35325	3.30752	3.37843	3.67287	3.44344	3.39285	4.04929	4.12082	4.2034	3.64252	3.59988	3.37611	4.33922	4.51747	4.30459	4.15991	3.8441	3.92901	4.72147	4.63606	4.60541	3.58842	3.51091	3.62517	5.60083	5.67108	5.6035	4.8776	5.09011	4.86737	4.00223	3.92245	3.96411	4.84301	4.71059	5.01124
Acvr1b	ENSMUSG00000000532	4.90919	4.81543	4.86169	4.11677	3.67807	4.02879	5.42938	5.36456	5.19031	4.06664	4.15199	4.10055	5.24923	5.18915	5.27386	4.07471	4.07953	4.07855	5.8542	5.7497	5.69097	4.06198	4.02506	3.76994	6.16152	6.11311	6.01669	4.0563	3.86415	3.93504	6.10563	6.02366	5.96349	3.90306	3.92553	3.82389	5.28426	5.30952	5.18378	6.06188	6.14335	6.15046	3.78018	3.93881	3.82085	6.15197	6.22424	6.27891
Gpa33	ENSMUSG00000000544	0.523105	0.633983	0.69736	0.108822	0	0.0186159	0.690789	0.627529	0.442239	0.146584	0.0738862	0.101666	0.528839	0.389948	0.501903	0	0	0	0.831919	0.754427	0.851079	0.0556767	0.0593371	0.032827	0.668428	0.406257	0.634277	0.194545	0.051929	0.0910651	0.427679	0.702744	0.625512	0.11604	0.0498764	0.0583376	0.538455	0.467818	0.419399	1.07009	1.02351	0.945139	0.0609065	0.0999835	0.027172	0.997911	0.845086	0.83944
Zfp385a	ENSMUSG00000000552	6.297	6.09524	6.14276	5.43978	5.35543	5.25124	6.64226	6.49099	6.15223	5.39357	5.24215	5.29879	6.76001	6.65835	6.88882	5.50844	5.38991	5.21201	6.05366	5.91721	6.08805	5.11121	5.15398	5.09914	6.15807	6.16925	6.08822	5.07185	5.01831	5.11584	6.30742	6.30635	6.3634	4.97369	4.90872	4.98689	5.46667	5.4311	5.59508	6.09364	6.07652	6.20128	4.94504	4.92896	5.01845	5.84659	5.91752	6.03757
Itga5	ENSMUSG00000000555	3.67725	3.67478	3.52946	4.82333	4.62047	4.7303	3.59249	3.42951	3.23079	4.77652	4.75668	4.698	3.38559	3.49486	3.54122	4.80608	4.64996	4.71896	3.19833	3.09195	3.12679	5.28099	5.27129	5.1066	3.13726	3.25769	3.25175	5.31329	5.14676	5.08742	3.50546	3.43454	3.40818	5.22756	5.14251	5.05538	3.436	3.37637	3.31551	3.35163	3.36441	3.44864	5.23138	5.27888	5.45736	3.39296	3.32277	3.39286
Wdr77	ENSMUSG00000000561	6.66306	6.81573	6.64734	6.7628	6.55702	6.74831	6.70202	6.69672	6.64485	6.59412	6.37179	6.52933	6.51027	6.55014	6.66495	6.72533	6.72162	6.80598	6.17544	6.20006	6.30653	5.87566	5.83998	5.69473	6.35839	6.24669	6.24933	5.86305	5.68871	5.90499	6.30027	6.33429	6.31276	5.94109	5.89181	5.86018	6.3703	6.30432	6.2731	6.10109	6.0141	6.02036	5.59443	5.45506	5.45117	6.19224	6.13294	6.06086
Sox9	ENSMUSG00000000567	3.01273	3.01687	2.97784	5.59834	5.59409	5.52032	3.8771	3.82971	3.79408	5.09744	4.98023	5.10747	4.63852	4.6276	4.80982	5.32697	5.50171	5.30099	2.6024	2.55881	3.1368	6.05753	5.9418	5.67757	3.35938	3.6699	3.37648	4.79253	4.42984	4.71773	3.98345	3.96581	3.9754	3.68549	3.69084	3.79587	2.8093	2.97732	2.74873	2.17276	2.33751	2.07657	6.22763	6.47385	6.29451	2.6962	3.01035	3.13957
Dynlt1c	ENSMUSG00000000579	4.01005	4.36906	4.07039	4.27548	4.30505	4.64936	4.17087	4.14436	4.32757	4.29759	4.35864	4.40307	4.10742	4.55982	4.38529	4.53389	4.49964	4.77492	3.86951	3.68217	3.63996	3.77046	3.72905	3.59856	3.45153	3.50524	3.92413	3.69579	3.50844	3.43021	3.53717	3.7534	3.61025	3.68866	3.68502	3.52968	3.82648	3.58402	3.48059	3.95782	3.72288	3.94303	4.06083	3.89826	4.03274	3.82596	3.85218	3.72216
Gm2a	ENSMUSG00000000594	1.99873	1.85931	2.0719	1.72035	2.01687	1.90524	2.15369	2.11773	2.03431	1.57796	1.55496	1.66636	2.2252	2.21988	2.23279	1.17942	1.59465	1.55232	2.87734	2.87625	2.8893	2.34835	2.31786	2.16462	2.54749	2.5824	2.59303	2.31877	2.03351	2.13446	2.78047	2.70152	2.62811	2.14624	2.01569	2.05372	2.33239	2.23286	2.17791	3.2082	3.18506	3.02967	2.9663	3.06871	3.10414	2.90257	3.01832	3.04784
Sema4f	ENSMUSG00000000627	0.883575	0.953937	0.781179	0.803315	0.817181	0.681675	0.556222	0.495064	0.41497	0.703071	0.558024	0.589779	0.577487	0.727515	0.528814	0.969632	0.860496	0.847772	0.660329	0.560193	0.549778	2.48904	2.36393	2.2423	0.584293	0.838261	0.739771	2.45164	2.32151	2.21706	1.05204	0.966697	0.972227	3.25901	3.17001	3.1923	1.37637	1.47066	1.28106	0.27961	0.36479	0.430843	2.88618	2.90614	3.08218	0.545202	0.411182	0.383977
Hk2	ENSMUSG00000000628	4.61072	4.59013	4.46762	4.30829	5.06416	4.14028	4.97542	4.91781	4.88944	4.33179	4.54188	4.26142	4.78916	4.8765	4.69797	4.82801	4.56527	4.40845	4.88537	4.91969	5.04286	3.73676	3.83125	3.79824	4.91633	4.97616	5.02179	4.12184	3.82619	3.97951	5.03166	5.05796	5.07883	3.74949	3.98893	4.02699	4.37292	4.47381	4.61071	4.77119	4.9745	5.3646	3.65351	3.73898	4.09508	4.99001	4.6546	5.16903
Myo18a	ENSMUSG00000000631	4.5394	4.35382	4.2475	4.80473	5.23972	4.61356	4.83804	4.45612	4.38953	5.06153	4.92515	4.93421	4.56916	4.68253	4.44825	5.03113	4.86905	4.96805	5.09977	5.01013	5.12295	4.75455	4.92283	4.52574	4.84406	4.72256	4.9387	4.8954	4.52306	4.53644	4.85571	4.73567	4.88539	4.70172	4.80683	4.7131	4.60089	4.42883	4.38272	5.35883	5.34133	5.54937	5.10585	5.10362	5.41822	4.97676	5.11662	5.14393
Haao	ENSMUSG00000000673	0.0378763	0	0.166903	0.10368	0	0.295215	0.246261	0.187171	0.0652065	0.0716949	0.036352	0.0315203	0	0.0961259	0.14733	0	0.228864	0	0.348943	0.105318	0.167926	0.245812	0.0679081	0.254625	0.234672	0.424847	0.525693	0	0.137879	0.149591	0.402831	0.377555	0.167452	0.255756	0.095079	0.132605	0.0316075	0.0579451	0	1.12279	0.941666	1.08152	0.0581867	0	0.149344	1.35824	1.32427	1.47492
Cd52	ENSMUSG00000000682	0.578839	0.502931	1.21563	3.1368	3.56808	3.19761	0.572969	0	0.100241	2.88702	2.45646	2.94135	0.652737	0.363197	0.792814	1.84277	3.06068	3.37603	1.11985	0.402792	0.900897	2.77629	2.55909	2.35239	0.274757	0.704023	0.870646	2.66346	2.55042	2.33332	0.767245	0.849099	0.707557	2.45063	2.29945	2.55758	1.75337	1.19468	1.34257	1.27565	0.986482	1.30062	2.58124	2.19211	2.37291	0.187584	0.936515	0.537604
Abhd15	ENSMUSG00000000686	1.39054	1.38721	1.22727	0.384248	0.747869	0.425096	0.364557	0.533733	0.584423	1.52246	1.17172	1.23119	1.09196	1.01198	0.969526	0.775234	1.06067	0.987288	0.358737	0.50586	0.439559	0.404376	0.383669	0.45425	0.197012	0.214806	0.136215	0.556354	0.539215	0.503187	0.189421	0.279739	0.252602	0.399646	0.388852	0.327979	1.07533	1.13788	0.926592	0.156535	0.131501	0.168136	0.341471	0.195464	0.277336	0.194116	0.207014	0.0778358
Loxl3	ENSMUSG00000000693	2.44737	2.25283	2.15815	2.32551	1.89379	2.47322	2.59427	2.51716	2.43137	2.50948	2.2906	2.27765	2.38603	2.54092	2.56966	3.02618	2.49258	2.54218	1.26014	1.56485	1.41434	3.61751	3.36363	3.10764	1.34297	1.57079	1.42285	3.24791	3.1211	3.192	1.06938	1.44104	1.73658	3.05886	2.97942	2.88078	2.42559	2.35911	2.25317	0.905888	1.01046	1.27834	3.9011	4.0506	4.16674	0.416076	0.243194	0.230643
Kat2b	ENSMUSG00000000708	2.43107	2.92211	2.25353	1.97257	1.90723	1.6567	2.34843	2.23619	2.61845	1.91807	1.69901	2.11236	1.66343	2.01891	1.94487	0.948848	1.22874	1.31792	2.68515	2.4748	2.63093	2.13554	1.98988	1.68964	2.57599	2.30872	2.59779	2.18756	2.17754	1.98745	2.25678	2.4706	2.44884	2.36782	1.98256	2.11676	2.87029	2.67852	2.59888	2.77739	2.66465	2.38002	2.5709	2.50127	2.68014	2.58965	2.77588	2.66206
Icosl	ENSMUSG00000000732	2.31403	2.04992	2.22964	1.62696	1.63572	1.6676	2.17261	2.11192	2.07767	1.69571	1.46342	1.6575	1.84798	2.08385	1.98282	1.17864	1.37139	1.2538	1.61055	1.56087	1.73063	1.98405	1.96557	1.93201	1.58579	1.4058	1.48085	2.12621	1.87887	2.18466	1.48948	1.54446	1.56861	1.79076	1.60836	1.63011	2.30598	2.22164	2.19774	1.20602	1.2837	1.20804	2.16719	2.09484	2.26237	1.21325	1.28166	1.12117
Sult5a1	ENSMUSG00000000739	2.22838	2.05498	1.76571	2.11274	1.45507	1.89834	3.90784	4.10658	3.56636	2.60753	2.23799	2.40822	3.23874	3.34602	3.454	2.70918	2.57193	2.72853	4.34555	4.24518	4.10561	2.66348	2.55706	2.60966	5.87257	5.703	5.65415	3.14362	2.88536	2.95883	5.16869	5.11853	4.87563	2.96587	2.64223	2.71181	2.95808	2.73742	2.68245	5.31435	5.51327	5.54046	3.03994	3.1178	2.9743	6.1725	6.18031	6.21461
Serpinf1	ENSMUSG00000000753	5.93801	5.95947	5.80778	8.4647	8.45028	8.34521	4.52168	4.10898	4.12231	8.27336	8.25457	8.03892	5.13787	5.17132	5.28861	8.7699	8.59414	8.6375	3.37687	3.3794	3.55474	7.98216	8.14617	7.95758	3.04817	3.69773	3.76863	7.61798	7.57425	7.66524	3.40325	3.73215	3.55494	8.17754	8.19241	8.11823	5.03503	5.14305	5.15505	2.39691	2.53627	2.65868	8.38045	8.28388	8.51375	1.34552	1.32799	1.34113
Tcf7	ENSMUSG00000000782	5.07582	5.24882	5.16546	4.6842	4.66105	4.60085	4.78097	4.67227	4.65535	4.82795	4.7512	4.63292	5.45321	5.52083	5.52257	4.8261	4.83744	4.86445	3.89891	3.81149	3.9611	4.45962	4.57666	4.65668	3.70112	3.79426	3.83599	3.93862	3.81622	3.9882	4.5526	4.64848	4.69555	4.37729	4.38507	4.49607	3.89208	3.81507	3.99711	4.1406	4.20223	4.19468	4.20659	3.97483	4.23597	3.4999	3.40018	3.39641
Kcnn3	ENSMUSG00000000794	0.196418	0.243808	0.241873	0.405916	0.223036	0.560936	0.257105	0.262604	0.154906	0.65374	0.653298	0.567313	0.223229	0.249197	0.313493	0.57205	0.606931	0.728717	0.147399	0.166005	0.202192	1.06125	0.816768	0.6587	0.126585	0.209941	0.181898	1.27513	0.925394	0.801576	0.26841	0.201407	0.240202	0.685975	0.815285	0.688282	0.752766	0.70605	0.646502	0.418481	0.466627	0.353698	1.367	1.0647	0.979864	0.163228	0.270846	0.407118
Car4	ENSMUSG00000000805	2.06556	1.97011	2.29167	0	0.0652646	0	3.29282	3.37864	3.50758	0	0	0.236112	2.65682	2.87579	2.72338	0	0	0.306617	0.307805	0.0708792	0.433847	0	0	0.0982638	1.61191	1.13403	1.2124	0.130307	0	0.031132	0.0574679	0.13998	0.230299	0.066146	0	0	0.0610463	0.0561018	0.0282067	0.0593208	0.232958	0.353302	0.0596888	0	0	0	0	0.0691156
Znf512b	ENSMUSG00000000823	5.1878	5.15673	5.13922	4.94519	4.06162	4.71869	5.3063	5.32026	5.22625	4.90177	5.04221	5.05407	5.24159	5.25568	5.30542	4.8133	4.80555	4.72954	5.71351	5.81995	5.83834	5.81766	5.66698	5.55593	5.80608	5.92358	5.81489	5.85387	5.82578	5.82813	5.85568	5.86232	5.79095	6.07741	5.91046	5.75764	5.71344	5.59606	5.6149	5.89975	5.94533	5.82008	5.98625	6.01131	5.80839	6.00795	5.80784	5.95835
Fmr1	ENSMUSG00000000838	5.75536	5.8586	5.85042	6.1843	6.02424	6.24883	6.18942	6.25981	6.55782	6.31573	6.53901	6.51826	6.38469	6.51239	6.31978	6.61076	6.60329	6.73116	6.04716	6.005	6.06746	6.28802	6.09118	6.01776	5.81127	5.7177	5.91159	6.21851	5.96238	6.16134	5.8141	5.76011	5.87468	6.26365	6.23455	6.19044	5.78857	5.74096	5.59902	5.77728	5.64527	5.69851	6.18337	6.19268	6.12539	5.67273	5.55737	5.65578
Bcl11a	ENSMUSG00000000861	6.21533	6.217	6.20893	5.15761	5.10099	5.03798	5.43913	5.51239	5.46049	6.059	6.0133	5.96129	5.53392	5.39481	5.57469	5.57959	5.56914	5.61102	6.22268	6.19277	6.09736	5.77958	5.70001	5.5787	6.46543	6.57735	6.3202	6.63652	6.42561	6.61015	6.49405	6.41834	6.41068	7.09618	7.08837	7.02061	6.59461	6.53626	6.50662	6.77442	6.97901	6.88039	6.12996	6.2144	6.0976	6.95924	7.03346	7.27852
Pxmp4	ENSMUSG00000000876	3.40658	3.32903	3.24978	3.2071	3.15327	3.16222	3.12872	2.93541	2.73275	3.3948	3.3706	3.24515	3.25728	3.19172	3.08646	3.11187	3.21732	3.10541	3.64414	3.56926	3.50482	3.81872	3.97858	3.7443	3.81601	3.61443	3.74688	3.76469	3.73357	3.82721	3.65747	3.5816	3.67622	3.95205	3.82626	3.94743	3.62873	3.74039	3.76972	4.09966	4.15338	4.12614	4.07513	4.06784	4.04132	3.93302	4.24302	4.02547
Dlg3	ENSMUSG00000000881	6.66091	6.56019	6.62526	6.06164	5.88724	6.2951	6.68647	6.70623	6.65457	6.31621	6.45972	6.35015	6.64062	6.69279	6.77512	6.18775	6.33308	6.4645	6.01678	5.97093	6.07489	5.65338	5.59843	5.43329	6.09506	5.98038	6.11056	5.46407	5.36637	5.5562	6.00235	6.04492	6.10364	5.58871	5.48411	5.60148	5.99975	5.9693	5.8741	5.90645	5.63207	5.77594	5.68437	5.58632	5.48654	5.83349	5.83156	5.66862
Mmp11	ENSMUSG00000000901	5.12677	5.03196	5.01567	3.60294	3.9274	3.83603	5.61921	5.59729	5.3005	4.20297	4.26987	4.11453	5.42706	5.31651	5.43656	3.48401	3.84277	3.8416	6.07626	6.03059	6.18594	5.34931	5.38883	5.17763	6.27333	6.21738	6.16325	5.91169	5.68371	5.67481	5.78214	5.84242	5.76656	5.91664	5.66111	5.76669	5.71155	5.66985	5.69419	5.93715	6.13395	6.08723	6.4334	6.4493	6.62042	6.27025	6.234	6.36547
Hip1r	ENSMUSG00000000915	4.61131	4.47269	4.44715	2.57754	2.43413	2.61737	4.7273	4.62073	4.34812	2.58612	2.5442	2.34439	4.72997	4.72701	4.85351	3.17099	2.9264	2.88933	4.93432	4.89414	5.10931	2.29195	2.28908	2.16247	4.86237	4.93294	4.88401	2.66771	2.53329	2.5252	4.81398	4.83787	4.84047	2.32554	2.2254	2.1687	4.53547	4.47453	4.4011	4.93555	4.89714	4.9709	2.52342	2.61026	2.49885	4.94265	4.77109	4.88949
Snrpn	ENSMUSG00000000948	2.56111	2.40555	2.51475	2.31688	0.917431	2.25848	2.95554	2.91317	3.07168	2.21225	2.05401	2.37188	2.92589	3.02835	2.9373	1.82578	2.15688	2.20371	2.4636	2.6321	2.47375	2.04396	1.92608	1.99957	2.5464	2.54993	2.84505	2.03468	1.9964	2.11581	2.7371	2.53725	2.42172	2.27405	2.14241	2.17319	2.88629	2.66231	2.43104	2.69641	2.52732	2.90743	2.11926	1.96092	1.44939	2.70843	2.04305	2.50604
Mmp14	ENSMUSG00000000957	7.0909	7.00571	6.97147	5.79326	5.56813	5.66842	6.32994	6.16936	5.96896	5.42047	5.42421	5.37048	6.3117	6.33036	6.40914	5.67015	5.60089	5.61314	6.96027	6.93164	7.1177	6.93184	6.79547	6.49085	6.41518	6.44472	6.4094	6.82928	6.41621	6.45436	6.65525	6.60193	6.62129	6.97617	6.83986	6.79465	6.64161	6.6277	6.5609	6.85322	6.93867	7.04099	7.54493	7.57604	7.72553	6.59267	6.64965	6.71846
Slc7a7	ENSMUSG00000000958	1.20303	1.08906	1.15714	1.27659	1.06992	1.30521	1.04898	0.937306	0.866303	1.22276	1.05596	1.16398	1.11515	1.11036	1.2255	1.09911	1.33951	1.24672	1.2457	1.09354	1.07639	1.7468	1.66915	1.68336	1.06941	1.0323	1.12953	1.54376	1.52768	1.42616	1.09036	1.07366	1.25674	1.58531	1.53131	1.53163	1.23268	1.12699	1.14096	1.06248	1.0603	1.08165	1.7366	1.78907	1.79048	0.827895	0.785083	0.893689
Ccl3	ENSMUSG00000000982	0.305407	0.351929	0.100791	1.04429	1.88351	1.61825	0	0	0.219454	0.712439	1.05267	0.705531	0.197732	0.0577252	0.341344	2.34249	1.73439	1.65574	0.495725	0.240053	0.389523	0.699938	0.681373	0.862604	0.306724	0.434885	0	0.710823	0.292073	0.794855	0.194137	0.291719	0.339743	0.867569	0.610014	0.67761	0.307012	0.410263	0.286197	0.713058	0.462418	0.543463	0.723704	0.674463	0.768157	0.216106	0.381488	0.431345
Icam4	ENSMUSG00000001014	0.208394	0.0910089	0.274654	1.70952	1.47173	1.79026	0.460057	0.0980047	0.2733	0.905251	1.02377	1.34515	0	0.048754	0.215967	0.35997	1.06871	1.05487	0.381722	0.152324	0.641006	1.82337	1.61509	1.37353	0.223864	0.531193	0.542555	1.81664	1.71469	1.38415	0.202815	0.454647	0.198378	1.39609	1.23794	1.52861	0.335676	0.41201	0.232655	0.50308	0.438445	0.20087	0.5943	0.443006	0.481754	0.428669	0.441309	0.377991
Ilf2	ENSMUSG00000001016	8.11359	8.25546	8.25537	8.58021	8.82538	8.64577	8.13006	8.17022	8.23504	8.56596	8.52311	8.55819	8.10817	8.14099	8.14004	8.68783	8.65146	8.76865	7.97298	7.88948	7.98632	8.27204	8.34558	8.17436	7.97058	7.89975	7.90238	8.19839	8.10403	8.22271	8.01558	8.02235	8.05814	8.35123	8.24991	8.36686	8.02726	8.00025	7.87916	7.78135	7.7269	7.69553	7.90921	7.81426	8.01256	7.7665	7.82991	7.73992
Snapin	ENSMUSG00000001018	5.34977	5.53322	5.53207	4.62834	4.80791	4.86406	5.3941	5.46108	5.42861	5.10362	4.96438	4.97896	5.41696	5.3701	5.49582	4.37004	4.86866	4.75281	5.40728	5.39731	5.45781	5.0267	4.90545	4.82098	5.48394	5.56476	5.45575	5.18661	5.09866	5.10768	5.35247	5.36371	5.41519	5.08842	4.99936	4.92647	5.64937	5.57929	5.6317	5.62454	5.61569	5.58032	5.47816	5.6037	5.63771	5.50322	5.63749	5.69062
S100a4	ENSMUSG00000001020	0.234451	0.292375	0.183442	2.73002	3.0941	2.51875	0	0	0.110115	0.803113	0.555612	0.462343	0	0	0	1.82903	1.77778	2.10752	0.210982	0	0	3.81379	3.84793	3.37716	0	0.244106	0	2.68498	2.6282	2.77142	0.189188	0	0	2.02011	1.61341	2.09768	0.612256	0.570085	0.338745	0.362149	0.446786	0.489369	4.79526	4.57686	4.8581	1.2546	1.25269	1.17565
S100a3	ENSMUSG00000001021	0.710078	0.341888	0.267959	0	0	0	1.19295	1.32081	0.891102	0	0	0	1.23266	1.18161	1.07158	0	0	0	0.910428	1.01408	1.2845	0	0	0	0.45265	0.441094	0.450368	0	0	0	0.73373	0.977445	0.85777	0.0686183	0	0	0.0633135	0.0581868	0.21298	0.90313	0.875273	0.825589	0.0575457	0.062689	0.237926	0.883269	0.808243	0.818199
S100a5	ENSMUSG00000001023	0	0	0	0	0.851264	1.08015	0	0	0	0	0.174496	0.137113	0	0	0.132491	0	0	0	0	0	0	0	0	0	0	0	0	0.381701	0.276118	0.251387	0	0	0	0	0	0	0.763519	0.349197	0.23023	0	0	0	0.333625	0	0.297548	0	0	0
S100a6	ENSMUSG00000001025	4.23949	3.83187	4.18318	4.14958	4.7342	4.75679	5.67993	5.42335	5.78588	2.04839	2.05516	2.03622	4.1458	4.26111	4.07702	3.11725	2.67053	3.11627	4.89617	4.864	5.12743	5.16041	5.12787	4.92279	4.59606	4.47389	5.10493	3.73283	3.38519	3.42582	4.32576	4.22977	4.42526	3.58588	3.16535	3.17908	3.56108	3.79449	3.57929	4.65204	4.62979	4.86037	4.92651	5.01371	5.2425	5.27292	4.99275	5.09609
Icam2	ENSMUSG00000001029	0.0358473	0.175388	0.149164	4.33282	3.86704	4.20849	0.041701	0.269371	0	4.30039	4.07851	3.82327	0	0.486865	0.0867813	4.53033	3.95477	4.37419	0.176019	0	0.0980964	4.25669	4.41138	4.01874	0.0297985	0.032961	0.102062	4.20221	4.28171	3.94841	0.274373	0.102891	0.208059	4.30784	4.04311	4.24394	1.11243	1.07325	0.514757	0.112445	0.297605	0.139197	4.39338	4.47945	4.60578	0.359476	0.406324	0.18944
Mapk7	ENSMUSG00000001034	6.19878	6.10418	6.04586	6.37116	5.4188	6.14666	6.06826	5.99126	5.7233	6.49918	6.52121	6.3862	5.99095	6.01748	5.99948	6.56395	6.40692	6.42738	5.49049	5.56202	5.65783	6.32764	6.38985	6.32678	5.71535	5.68561	5.81199	6.37479	6.17501	6.36342	5.6548	5.64581	5.67308	6.46143	6.44591	6.39088	5.98821	6.04229	6.01195	5.50474	5.47947	5.59233	6.44786	6.45652	6.53378	5.64053	5.49337	5.56815
N4bp3	ENSMUSG00000001053	3.64023	3.36187	3.43286	4.32647	4.09422	4.07791	3.93862	3.78519	3.44598	3.38947	3.2384	3.03286	3.71464	3.79506	3.87999	3.63034	3.46513	3.32064	2.75169	2.54267	2.91415	3.93804	3.9858	3.8139	3.44412	3.27856	3.22628	3.7501	3.77294	3.67278	3.12042	3.14448	3.22754	3.61442	3.24867	3.37975	3.19015	3.10618	3.09766	3.13044	3.18301	3.15146	3.62828	3.73373	3.60902	2.96436	3.04201	3.08341
Nhp2	ENSMUSG00000001056	7.42837	7.32686	7.28744	7.50328	7.91764	7.38209	7.42212	7.25289	7.10861	7.54842	7.60944	7.42717	6.97211	7.02564	6.99111	7.79604	7.63967	7.71048	6.89996	6.74361	7.06245	6.39893	6.65533	6.46351	6.98411	6.88625	6.9523	6.7872	6.68101	6.90334	6.9687	6.90962	7.02759	6.64449	6.48165	6.82434	7.03857	6.94987	7.05625	7.05874	6.98949	6.95351	6.16718	6.30617	6.30675	6.95546	6.8092	6.89684
Vps9d1	ENSMUSG00000001062	4.65731	4.64399	4.68792	4.6069	4.21003	4.42951	4.90161	4.63451	4.16643	4.58345	4.25865	4.27209	4.63095	4.57942	4.86304	4.91082	4.29048	4.38469	4.32258	4.5015	4.44638	4.83513	4.83457	4.84775	4.42266	4.624	4.45146	4.72335	4.59131	4.75896	4.48388	4.48276	4.31581	5.01217	4.78017	4.75722	4.76085	4.57175	4.47542	4.66456	4.74084	4.68203	5.59808	5.40703	5.41108	4.90968	4.88149	4.83139
C1ql4	ENSMUSG00000001076	1.35306	1.30162	1.09235	0.0528969	0	0	0.985428	1.03259	0.636971	0.0543897	0	0	1.38786	1.02449	1.38489	0	0.0901314	0	0.499584	0.616782	1.31671	0.395537	0.408112	0.52186	0.0472197	0.244801	0.209508	0.0937335	0.154993	0.0914288	0.0849942	0.249115	0.456501	0.0518018	0.0953205	0	1.415	1.51075	1.34769	0.213456	0.365047	0.308382	0	0.0939835	0.0385678	0.141138	0.132478	0.151465
Luzp1	ENSMUSG00000001089	5.77073	5.85367	5.79969	5.73734	4.9976	5.83209	6.42062	6.53908	6.56412	5.62513	5.74871	5.68743	6.34196	6.4497	6.36694	5.61622	5.64742	5.70236	6.28855	6.26323	6.28659	5.45142	5.34395	5.14534	6.35843	6.2458	6.25959	5.27772	5.1022	5.20161	6.27766	6.19434	6.20152	5.12565	5.34217	5.07783	5.40923	5.32104	5.23891	6.14131	5.9693	5.91392	5.4448	5.24673	5.01114	5.92588	6.08585	5.87343
Col6a1	ENSMUSG00000001119	0.532872	0.623224	0.643485	1.07955	1.08393	0.828394	2.0616	1.91696	1.62227	2.31118	2.32831	2.23743	1.11803	1.22114	1.27572	2.65233	2.52873	2.51886	0.324146	0.222145	0.193098	4.00652	3.70299	3.52992	0.824286	1.75193	1.78747	5.21985	4.82674	4.84642	0.569738	0.551524	0.44641	5.72799	5.58242	5.50161	1.86896	1.96558	1.69065	0.332489	0.664305	0.666176	5.6985	5.88802	6.28206	0.543586	0.339347	0.441304
Pcbp3	ENSMUSG00000001120	4.55518	4.63658	4.32478	5.09577	4.89544	4.96166	4.29813	4.15331	4.15555	5.0375	4.79339	4.71961	4.16295	4.20324	4.14573	4.88439	4.79781	4.41907	3.24588	3.27873	3.32345	4.76379	4.66317	4.64532	3.43591	3.6465	3.38726	4.44364	4.57163	4.49626	3.6011	3.6368	3.62357	4.5087	4.43082	4.34691	4.2798	4.16528	4.08711	3.34451	3.47753	3.64794	4.6721	4.29121	4.58681	3.48837	3.62304	3.56156
Lgals9	ENSMUSG00000001123	0.612943	0.408099	0.574877	1.49063	0.87873	1.75353	0.132791	0.268734	0.249695	1.11536	0.869182	1.06486	0.194871	0.0752982	0.202399	1.36055	1.22489	1.47173	0.710436	0.496987	0.181493	1.90665	1.81004	1.63184	0.514555	0.382246	0.356984	1.70685	1.57414	1.65756	0.247969	0.388662	0.319671	1.81897	1.64034	1.40419	1.10996	1.16048	1.14959	1.3048	1.28956	1.32577	2.66828	2.79743	2.8559	0.825055	1.2675	1.24378
Timp1	ENSMUSG00000001131	2.80587	2.74903	2.63419	3.18747	3.83485	2.97132	2.84268	2.50265	2.69324	4.44271	4.15972	4.28074	2.68112	2.74771	2.88083	4.12688	3.97153	4.26576	1.34749	1.09973	1.10356	3.50749	3.56015	3.27217	2.46234	2.20335	2.31601	4.27084	4.23344	4.323	2.23233	2.05868	2.33404	4.15615	3.93366	4.09413	3.25079	3.1754	3.02583	1.08326	1.60702	1.17352	3.28825	3.32928	3.37822	1.73775	1.52707	1.59076
Uxt	ENSMUSG00000001134	4.46274	4.52339	4.58805	4.43785	4.61514	4.28642	4.50005	4.44492	4.52018	4.67552	4.58722	4.43803	4.33281	4.41926	4.49992	4.83715	4.35476	4.54251	4.39583	4.04586	4.28684	4.04494	3.9395	4.10549	4.10662	4.2592	4.14556	4.13263	4.06072	3.93174	4.08756	4.26067	4.28548	4.14939	4.0554	4.18605	4.36522	4.26357	4.18691	4.06711	4.10227	3.82097	3.48407	3.41224	3.56267	4.04762	3.99959	3.97271
Mxd1	ENSMUSG00000001156	3.17037	3.15201	3.26271	2.87642	2.79456	2.8454	2.87926	2.88614	2.90123	2.89676	2.8588	2.98698	3.19126	3.12313	3.25952	2.94031	3.00801	2.97816	3.47646	3.39964	3.49991	3.53911	3.44848	3.32394	3.41189	3.34139	3.39039	3.59991	3.40456	3.41616	3.51677	3.35641	3.47756	3.60881	3.4996	3.47463	3.66165	3.67033	3.47115	3.48429	3.4689	3.32516	3.71812	3.75336	3.74311	3.26441	3.29085	3.35803
Oas1c	ENSMUSG00000001166	1.38141	1.5404	1.50782	0.52992	0.227259	0.563	1.24829	1.29985	1.31939	0.379012	0.428951	0.476741	1.13611	1.65256	1.41412	1.17426	0.398923	0.378995	1.28114	1.11441	1.27657	0.361794	0.32052	0.477206	1.30891	1.09682	1.30973	0.762998	0.414346	0.611009	1.58861	1.36234	1.59491	0.294463	0.476807	0.27801	1.73278	1.58985	1.54522	1.19366	1.16186	1.02015	0.505374	0.27111	0.501631	1.3735	1.26842	1.27716
Agpat3	ENSMUSG00000001211	5.47425	5.30162	5.33327	4.44033	4.33806	4.18728	5.27087	5.0641	4.82518	3.97149	4.06078	3.98476	5.01523	5.03261	5.11491	4.1156	3.91304	3.84585	5.21697	5.09294	5.18464	4.54148	4.71187	4.46163	5.17286	5.18593	5.17596	4.64791	4.54555	4.55297	5.15652	5.17623	5.13465	4.59613	4.41529	4.54233	5.71986	5.72767	5.68154	5.09256	5.03984	5.04173	4.74681	4.88879	4.59831	5.06648	5.01958	5.01446
Sema6b	ENSMUSG00000001227	0.577897	0.446343	0.590005	1.37781	1.06421	1.21572	0.262397	0.155914	0.183428	0.811738	0.939949	0.888117	0.21376	0.15632	0.292031	1.30761	1.28506	1.19671	0.196004	0.0923144	0.147532	1.28102	1.29835	1.12076	0.141424	0.269985	0.192457	1.97702	1.7402	1.59308	0.219444	0.257335	0.0898646	2.0492	1.84209	1.86462	0.805706	0.750701	0.751501	0.251434	0.24274	0.175495	1.89751	1.91697	1.63921	0.251909	0.259344	0.345044
Uhrf1	ENSMUSG00000001228	7.7005	7.81274	7.72505	7.979	7.492	7.89608	8.10525	8.03571	7.83328	7.97691	8.11883	7.95467	7.79718	7.88521	7.76364	8.11108	7.99133	7.91856	7.40823	7.44978	7.45235	7.49571	7.52969	7.38223	7.75391	7.57597	7.55848	7.51979	7.27765	7.53857	7.66164	7.63367	7.70439	7.50671	7.52859	7.56709	7.41644	7.26364	7.17136	7.54726	7.47684	7.59658	7.01869	6.98037	6.88415	7.73627	7.64784	7.54789
Ramp2	ENSMUSG00000001240	0.715246	0.597809	0.70794	5.75025	5.90589	5.67124	1.17723	0.656153	0.56878	5.78263	5.49508	5.63175	0.700789	0.404319	0.760195	5.50329	5.63531	5.83565	0.352796	0.53525	0.558935	5.43475	5.60229	5.10077	0.637536	0.642425	1.08838	5.69544	5.60743	5.49843	0.531722	0.644715	0.536356	5.5171	5.38623	5.2659	2.16996	2.52202	1.32057	1.3925	2.02634	1.39534	5.7652	5.53882	5.93347	1.95119	2.27321	2.15833
Lsr	ENSMUSG00000001247	6.93363	6.71958	6.74104	2.45775	2.40093	2.5303	6.80666	6.56866	6.42714	2.64897	2.82471	2.65441	6.5166	6.50789	6.5753	2.47558	2.26034	2.12071	6.63115	6.54196	6.76649	2.04178	2.28379	2.18473	6.70636	6.70439	6.62345	2.84548	2.6376	2.7917	6.68749	6.66	6.71998	2.45095	2.27281	2.27808	6.95147	6.96101	6.96816	6.44131	6.54773	6.46617	2.26008	2.63738	1.98511	6.44158	6.48827	6.56611
Hpn	ENSMUSG00000001249	3.59352	3.35534	3.54351	1.97571	1.59925	1.52265	4.24025	4.04315	3.80549	0.902614	1.11828	1.2182	4.22379	4.3373	4.22605	1.94484	1.4216	1.27481	2.97903	2.71268	3.21698	0.870628	0.830304	0.762381	3.7066	3.55393	3.71127	0.77447	0.864226	1.1102	3.51248	3.5236	3.44493	0.591092	0.627724	0.756209	3.6049	3.60246	3.54717	3.05182	3.2198	3.17819	0.86644	0.755347	0.687682	3.90338	3.80422	3.74495
Ckb	ENSMUSG00000001270	6.52594	6.35835	6.41496	4.10272	4.22514	3.88578	4.98793	4.70787	4.35945	3.82455	3.75567	3.81317	4.16804	4.08159	4.11328	3.88058	4.16565	3.87572	4.67839	4.59789	4.96613	4.43369	4.504	4.24175	4.45427	4.55328	4.5704	4.56831	4.50973	4.35089	4.75295	4.62573	4.39912	4.66151	4.28202	4.42085	7.9856	7.95877	7.7999	5.0648	5.26852	5.23757	4.18683	4.57852	4.29067	4.46178	4.65486	4.83215
Itgb7	ENSMUSG00000001281	1.14685	1.25416	1.1925	0.33226	0.5805	0.237304	2.33577	2.18781	2.03642	0.374621	0.393009	0.481038	1.98106	2.10169	1.91906	0.0950975	0.334176	0.381016	1.40271	1.41507	1.62798	0.95974	0.766802	0.606635	1.35711	1.38493	1.27253	0.698608	0.6248	0.597399	1.30672	1.33257	1.26761	0.691409	0.683499	0.587433	0.491746	0.486932	0.568364	0.995202	0.992607	1.28703	0.612438	0.578338	0.647844	1.01298	0.929304	1.06466
Rarg	ENSMUSG00000001288	5.0135	4.80855	5.03455	7.1946	6.93342	7.09217	6.37394	6.09064	5.95472	7.30953	7.22109	7.2233	6.22661	6.08176	6.31584	7.08108	6.94329	6.95217	6.63412	6.41459	6.5074	7.19465	7.24035	7.09771	6.7603	6.60799	6.57917	7.41392	7.32907	7.34305	6.80523	6.69266	6.6039	7.38376	7.23267	7.25852	5.02201	4.96471	4.86535	6.86717	6.84982	6.9178	7.55301	7.58959	7.72501	6.81611	7.11842	7.1621
Efnb2	ENSMUSG00000001300	6.51153	6.54794	6.56698	6.3924	6.00469	6.2926	6.46422	6.48048	6.46349	6.23438	6.33963	6.20051	6.92633	6.90964	6.89616	5.46731	5.49279	5.48229	7.1605	7.23552	7.12652	7.09564	6.96868	6.84639	6.89249	6.92159	6.7938	5.99512	5.89326	5.92481	6.96409	6.97968	6.90365	5.51202	5.59693	5.52777	6.79813	6.79735	6.78884	6.3845	6.57184	6.46954	6.95779	6.89883	6.82949	6.19585	6.55337	6.48522
Rrp15	ENSMUSG00000001305	6.15209	6.26838	6.21787	6.42914	6.91164	6.52262	6.10975	6.17145	6.30333	6.60034	6.56336	6.58156	5.99755	6.1007	6.00438	6.77695	6.60192	6.71684	5.69636	5.62697	5.69408	5.6263	5.68642	5.64338	5.80388	5.76173	5.85221	5.93937	5.89899	5.97872	5.73137	5.80486	5.87507	5.7972	5.66345	5.74171	5.92523	5.86439	5.89919	5.65342	5.60504	5.46115	5.43684	5.47769	5.41152	5.71228	5.65476	5.61968
Rnd2	ENSMUSG00000001313	4.42852	4.37355	4.45095	3.73212	4.02614	3.55065	3.80284	3.63201	3.50806	4.15664	4.19495	4.07427	3.66065	3.52618	3.78725	3.08643	3.24537	3.39112	3.14669	3.2477	3.28461	3.86319	3.92484	3.69889	3.45044	3.27133	3.23942	3.87057	3.8355	3.87662	3.39848	3.42758	3.46892	3.62326	3.45149	3.62026	4.47002	4.62568	4.44949	3.18429	3.43523	3.25824	3.94726	3.87195	4.22871	3.81731	3.7149	3.69026
Srr	ENSMUSG00000001323	3.41097	3.65103	3.49688	4.36659	3.43335	4.63435	3.49102	3.48188	3.69622	4.60729	4.23521	4.30957	3.61475	3.57645	3.77384	4.34033	4.02955	4.25353	3.6681	3.63849	3.29712	4.78415	4.83864	4.628	3.8858	3.66546	3.71348	4.81429	4.67919	4.68215	3.91056	3.77395	3.76665	4.84926	4.76532	4.77578	3.62181	3.69961	3.69832	3.85499	3.77507	3.70759	5.1743	5.21066	4.9852	3.74498	3.94461	3.84057
Fndc5	ENSMUSG00000001334	1.66587	1.85999	1.6687	2.74477	2.8384	2.7574	1.21123	1.0735	1.05476	1.59025	1.48782	1.60343	1.3617	1.32705	1.35554	2.72918	2.71807	2.46732	1.70629	1.44223	1.71427	2.77388	2.80744	2.562	1.39033	1.15955	1.29784	3.01027	2.60864	2.27695	1.72249	1.51618	1.5409	2.45968	2.23455	2.50581	1.32425	1.4379	1.38726	1.95693	1.8572	1.97666	2.66999	2.64225	2.75473	1.51044	1.73394	1.53966
Acp5	ENSMUSG00000001348	1.26655	1.11778	1.31166	4.01661	4.41862	4.43482	1.03582	0.851857	0.838843	3.65628	3.27181	3.7082	0.956899	0.970618	1.45431	3.45481	3.20137	3.57971	1.85677	1.81452	1.745	3.78546	3.60733	3.30873	2.06141	1.86385	2.0239	3.7767	3.56662	3.46951	2.22025	1.94288	2.04698	3.68693	3.43235	3.46976	1.81822	1.76768	1.56938	2.94925	2.93014	2.83539	2.4424	2.18568	2.08977	3.03627	3.22809	3.29351
Cct3	ENSMUSG00000001416	8.7316	8.76078	8.64464	9.02615	9.6088	9.09117	8.78332	8.65865	8.65446	9.16028	9.23624	9.08173	8.41864	8.52986	8.3992	9.22852	9.14479	9.23809	8.66981	8.63693	8.76238	8.70164	8.91852	8.77211	8.77325	8.59974	8.53763	9.02584	8.87234	9.07495	8.70331	8.72425	8.69255	8.98267	9.06052	9.07794	8.88085	8.86024	8.79278	8.15582	8.21286	8.30661	7.98057	8.06537	8.10549	8.36962	8.30775	8.25495
Mef2d	ENSMUSG00000001419	4.42607	4.50464	4.40911	4.43407	3.32451	3.93153	4.34066	4.15578	3.93222	4.41954	4.22634	4.1033	4.16043	4.0315	4.41019	4.10124	4.21441	4.18479	4.24221	4.15365	4.24125	4.37954	4.39715	4.08865	4.51165	4.41124	4.26998	4.66889	4.38871	4.5208	4.35362	4.12023	4.15179	4.54179	4.41639	4.28905	4.72136	4.69188	4.65169	4.77723	4.71867	4.70147	5.18706	4.98016	4.79513	4.74348	4.64936	4.6986
Tmem79	ENSMUSG00000001420	2.70876	2.65031	2.60041	1.20482	2.4644	1.81052	3.06354	2.91975	2.87488	1.41384	1.44019	1.54297	3.11234	2.77451	2.88099	1.63182	1.60599	1.45784	4.43733	4.34234	4.34413	1.48778	1.53872	1.57578	4.25428	4.06516	4.12111	1.49219	1.32839	1.52788	4.20648	4.00588	3.95246	1.55915	1.57295	1.38912	3.16831	3.19931	3.08118	4.39375	4.33241	4.42526	1.18006	1.52667	1.27961	4.32552	4.5162	4.53351
Col18a1	ENSMUSG00000001435	7.79401	7.61037	7.60383	5.02608	4.54883	4.96587	9.01328	8.81471	8.55823	5.27234	5.52353	5.23335	8.51406	8.60865	8.5785	5.1967	5.15965	4.90515	8.53273	8.50894	8.76545	5.17036	5.1526	4.89064	8.34904	8.50609	8.43734	5.26734	5.22429	5.16312	8.41729	8.46893	8.46061	5.11114	5.13899	4.9727	7.23151	7.26848	7.28053	7.83223	8.04591	8.29949	4.8066	5.0776	5.0479	7.62688	7.80038	8.04484
Slc19a1	ENSMUSG00000001436	4.44863	4.55272	4.45581	4.84633	4.22345	4.82001	4.18879	4.17547	3.85726	4.67969	4.65847	4.5144	3.88242	3.93117	4.14743	4.95528	4.76988	4.75511	3.78102	3.7277	3.84717	4.24968	4.41523	4.06817	4.19427	4.19299	3.99082	4.43701	4.3239	4.53392	4.08818	4.08616	4.12318	4.32272	4.38466	4.28914	4.28446	4.33257	4.35991	3.83712	3.92581	4.00098	4.28411	4.34569	4.20401	4.13992	4.21622	3.98462
Kpnb1	ENSMUSG00000001440	8.75707	8.87708	8.76521	8.91375	8.80639	8.89321	8.42179	8.55971	8.63625	8.88418	9.0426	8.94308	8.45827	8.62537	8.40173	9.07566	9.07176	9.04243	8.17911	8.18937	8.1729	8.29645	8.30388	8.25584	8.07026	8.03267	8.10828	8.28474	8.1975	8.29886	8.11966	8.11266	8.18889	8.20618	8.31101	8.26551	8.37155	8.38281	8.32517	8.1029	8.1004	8.15374	8.12861	8.16482	8.20255	8.16698	8.1957	8.1614
Cyp51	ENSMUSG00000001467	6.38933	6.52158	6.53714	6.34699	6.37506	6.44044	6.32815	6.43917	6.51496	6.32592	6.57298	6.43276	6.32373	6.38733	6.34249	6.31144	6.53713	6.57135	5.92589	5.9254	6.01347	6.59703	6.4762	6.51695	6.00479	6.00366	6.04312	6.41045	6.1566	6.27011	5.97957	5.94457	6.0477	6.60404	6.40849	6.6221	6.47149	6.39189	6.44469	5.41698	5.44093	5.41644	5.91988	6.09635	5.84272	5.82128	5.74942	5.67453
Tubb6	ENSMUSG00000001473	3.57742	3.50584	3.568	5.78529	5.95293	5.65026	5.7782	5.64594	5.36032	5.83908	5.63656	5.61001	5.4327	5.37928	5.32101	5.82867	5.62212	5.51454	1.80298	1.86115	2.20529	4.63736	4.81818	4.58386	3.25819	3.52121	3.60088	5.21475	5.10674	5.20671	2.75548	3.07037	3.30249	5.13225	5.03291	5.14374	1.94769	2.10889	1.76594	1.63758	1.67949	1.69884	4.74757	4.82135	4.9953	1.78077	1.87923	1.78096
Meox1	ENSMUSG00000001493	0.792706	0.744134	0.764553	2.42047	2.33314	2.29878	0.573776	0.506532	0.556517	1.45537	1.42402	1.50531	0.635436	0.564813	0.599411	0.776571	0.829444	0.827145	0.186812	0.140414	0.169842	1.86107	2.07865	1.93695	0.138487	0.289788	0.143544	3.97703	3.5242	3.06327	0.429695	0.449191	0.470467	1.45647	1.20378	1.09655	0.882368	1.20858	0.99802	0.192512	0.191966	0.242929	1.81555	1.82762	1.92749	0.190914	0.350506	0.122387
Sost	ENSMUSG00000001494	0.924594	0.910464	0.851174	0.61774	0.507778	0.474682	1.82068	1.93762	1.90585	0.403212	0.222108	0.328538	1.54476	1.34956	1.6625	0.216616	0.427175	0.32622	0.087584	0.0779623	0.183621	0.59527	0.483351	0.340307	0.211731	0.215548	0.244524	0.440157	0.335918	0.434046	0.0778212	0.349048	0.504805	0.513005	0.524525	0.399481	1.01859	1.09857	1.13539	0.0996244	0	0.122306	0.462151	0.473159	0.359581	0.0720073	0.0340427	0
Pax9	ENSMUSG00000001497	0.385117	0.573975	0.774135	4.57331	4.36184	4.52018	1.43737	1.44315	1.51059	1.8081	1.80936	2.02841	0.829613	0.92279	0.783992	3.1067	3.23119	3.3287	0.427427	0.323404	0.240162	6.31029	6.28384	5.99706	2.89285	3.03533	2.29319	4.62164	4.37029	4.43165	0.626578	0.812423	0.721339	4.30662	4.36342	4.25159	2.07987	2.55434	1.10539	0.456843	1.56928	1.03286	6.0874	6.16231	5.90032	1.24083	1.78671	1.50709
Irx2	ENSMUSG00000001504	2.69955	2.9911	3.10604	0.722563	1.45832	1.07112	5.43895	5.61031	5.79723	1.55281	1.79886	1.54595	5.073	4.71201	4.92695	1.16745	2.17048	1.79817	3.76387	3.65172	3.87914	0.788494	0.718612	0.463085	5.72358	5.74845	5.92635	3.03555	3.21591	2.82041	4.98403	4.4995	4.52579	1.31668	0.774124	0.797686	2.08762	1.75753	1.98247	5.05535	5.07792	5.08161	0.380068	0.559628	0.594534	6.01786	6.72465	6.47407
Col1a1	ENSMUSG00000001506	0.217633	0.589964	0.545507	3.48125	2.97735	3.1806	0.359906	0.326565	0.206676	3.37434	3.26538	3.32758	0.335858	0.17689	0.244173	3.56529	3.05041	3.0147	0.710898	0.469818	0.327516	5.90329	5.7597	5.4549	1.44264	2.50609	2.10122	6.67361	6.11649	6.16405	0.550578	0.953679	0.69826	6.56315	6.73971	6.45815	1.22242	1.35011	0.695128	0.749403	1.20189	1.44454	7.10747	7.44764	7.85038	1.36998	0.763113	0.852842
Itga3	ENSMUSG00000001507	5.97238	5.82799	5.82006	1.77464	1.70373	2.29194	7.21612	7.08825	6.7974	1.30937	1.40961	1.25632	6.79434	6.82386	6.82643	1.12137	1.30499	1.11219	6.40029	6.45989	6.56131	1.59231	1.43042	1.38174	6.42908	6.62414	6.40481	1.184	1.2224	1.22034	6.37321	6.40352	6.38036	0.842385	0.910956	0.659635	5.08695	5.10762	5.13179	6.12779	6.32392	6.50868	1.78907	1.89307	1.80904	6.06001	6.10649	6.35498
Dlx3	ENSMUSG00000001510	5.90305	5.87499	5.83585	0.783305	0.406619	0.719072	6.09885	6.06688	5.82111	5.87194	5.75842	5.79168	6.04324	5.97991	6.19609	1.59726	1.81259	1.76152	7.71591	7.70896	8.21191	1.72952	1.7696	1.86376	6.25839	6.33208	6.44114	4.97237	4.92281	4.97928	6.78329	6.77647	7.12292	1.3847	1.26538	1.24993	5.79769	5.66761	5.90346	7.83498	7.37801	7.72307	4.09531	4.07343	4.35682	6.59688	6.2924	6.48063
Nrip2	ENSMUSG00000001520	0.23345	0.10302	0.0893101	0.0218443	0.20944	0.0584271	0.407727	0.212171	0.122532	0.195026	0.492434	0.213967	0.294425	0.290148	0.277412	0.0570871	0.156278	0.189541	0.172796	0.29172	0.392643	0.715726	0.61713	0.470935	0.55687	0.631344	0.509253	0.813804	0.825087	0.559626	0.56562	0.651419	0.507911	0.751883	0.456062	0.563789	0.357138	0.440541	0.443671	0.429464	0.672268	0.696311	1.57275	1.6037	1.69431	0.725968	0.974951	1.04429
Ell2	ENSMUSG00000001542	4.37927	4.60176	4.54116	2.85661	2.71729	3.30686	2.46863	2.44858	2.67155	2.79827	2.74018	2.89831	3.40728	3.29258	3.37137	2.91416	2.49544	2.80728	4.38556	4.20307	4.25743	2.37999	2.20463	1.99817	3.84125	3.6149	3.78118	2.52178	2.29847	2.34778	3.94717	3.75511	3.70752	2.25619	2.14539	2.09066	4.77835	4.68222	4.57602	4.14123	4.04899	4.10095	2.88541	2.86975	2.56832	3.73481	3.86438	3.72321
Jup	ENSMUSG00000001552	5.86308	5.75904	5.66822	4.31187	3.92343	4.36991	6.11011	6.06997	5.77363	3.75591	3.73401	3.59018	6.26298	6.16004	6.28733	4.02427	3.93957	4.09068	7.35771	7.34975	7.42303	4.88066	4.83675	4.70267	7.26405	7.30825	7.12972	4.50916	4.46047	4.22278	7.18374	7.13016	7.01198	4.61232	4.50984	4.53385	6.50536	6.42466	6.42909	7.48777	7.67108	7.67569	4.86631	5.08813	4.95093	7.54072	7.72229	7.86305
Fkbp10	ENSMUSG00000001555	5.04572	4.86566	4.86783	5.24089	5.44032	5.29842	5.46676	5.22802	5.08763	5.75969	5.78511	5.63266	5.30577	5.42121	5.35898	5.87576	5.57541	5.66695	4.82399	4.77264	5.02341	6.32913	6.2868	5.96429	4.78399	4.80278	4.95286	6.29074	6.07078	6.23928	4.94266	5.01385	5.07405	6.10133	5.98295	6.08934	4.83958	4.94663	4.80751	4.42999	4.46637	4.64029	6.51167	6.70786	6.85378	4.30339	4.09615	4.22699
Klhl10	ENSMUSG00000001558	0.910042	0.96838	0.748317	0.788828	1.14742	0.890708	0.917177	0.594064	0.820552	1.08589	0.876711	0.817527	0.977889	0.973079	0.768061	0.461019	0.957559	0.753918	0.754259	0.594491	0.703258	0.899346	0.95173	0.874699	0.898221	0.711653	0.739991	1.16055	0.861624	0.982406	0.954342	0.736648	0.778511	0.971712	1.11689	1.14381	0.660602	0.861948	0.814523	0.757439	0.794093	1.05759	1.21395	1.21912	1.32434	1.05381	0.796633	0.968765
Nom1	ENSMUSG00000001569	4.87057	5.05824	4.93375	4.78443	5.07519	5.19855	5.29119	5.09301	5.05943	4.84496	5.07709	5.16699	4.69865	4.87472	4.7402	5.37634	5.14884	5.336	4.96039	4.8511	4.94169	4.74166	4.86366	4.592	5.22838	5.02722	5.16122	4.96632	4.68427	4.88022	5.0046	5.00717	5.16522	4.86501	4.70123	4.66126	4.98425	4.88488	4.91031	4.52925	4.3109	4.56654	4.15769	4.21979	4.36048	4.86999	4.61808	4.42089
Tnk1	ENSMUSG00000001583	3.53183	3.60258	3.39077	0.251749	0.402567	0.0491694	3.49074	3.5157	3.22889	0.0290326	0.210474	0.174115	3.65602	3.55299	3.81346	0.313983	0.175596	0.0316123	3.36505	3.40854	3.58478	0.249093	0.092319	0.107274	3.65256	3.60602	3.53294	0.0945317	0.0566077	0.0742162	3.3075	3.47564	3.41573	0.0547788	0.0641238	0.130855	3.7357	3.72839	3.76042	3.38479	3.51854	3.55254	0.47112	0.387059	0.431669	3.55693	3.52114	3.66281
Tcea3	ENSMUSG00000001604	2.0673	2.04366	2.12756	0.150284	0	0.0354374	1.09828	0.980338	0.970256	0.386238	0.20858	0.182802	1.52077	1.3267	1.54243	0	0	0.410411	1.45695	1.4091	1.2963	0.449725	0.3644	0.206799	1.11143	0.982644	1.33106	0.890927	0.664748	0.410041	1.15401	0.783979	1.14893	0.23663	0.0959181	0.0667604	1.28793	1.38305	1.46009	1.94596	1.94695	2.23627	0.798382	1.1398	0.907428	1.56686	1.7183	1.54377
Csn3	ENSMUSG00000001622	0.639246	0.906986	0.76451	1.85426	1.63464	1.95379	0	0.125133	0.169493	3.48407	3.39036	3.1399	0.445818	0.127542	0.399005	2.58699	2.69593	2.64037	0	0	0	0.27748	0.322475	0.15884	0	0	0	0.342106	0.168497	0.261066	0.0289663	0	0	0.0837181	0.123085	0.129426	0.179435	0.37419	0.270503	0	0	0.0581089	0.0756866	0	0.0955506	0.0441595	0.0415396	0
Ifrd1	ENSMUSG00000001627	6.14929	6.3269	6.23002	6.70288	7.31204	6.89455	6.07801	6.21438	6.42324	6.60122	6.517	6.69448	5.99285	6.04296	6.00509	7.08433	7.06172	7.28988	5.76896	5.63262	6.05027	6.39723	6.35429	6.40117	5.70912	5.75263	5.92316	6.42681	6.28536	6.35373	5.6974	5.76415	5.86256	6.38768	6.39288	6.42158	6.27105	6.22714	6.1489	5.67365	5.5796	5.62545	6.2728	6.44597	6.36408	5.77513	5.50213	5.59691
Akr1b3	ENSMUSG00000001642	5.35522	5.66494	5.51973	5.88555	5.97171	5.86962	5.29202	5.34392	4.86155	6.3157	6.17964	5.79604	4.85567	5.11998	5.13652	5.65097	5.96634	6.02713	5.31307	5.09652	5.29039	5.58311	5.80811	5.70797	5.13757	5.35927	4.99416	5.7872	5.866	5.79461	5.5812	5.38929	5.3819	5.83057	5.76767	5.73649	5.49322	5.48844	5.33771	4.73969	4.83005	4.87256	4.70363	4.70685	4.90839	4.77744	4.86948	4.82865
Hoxc13	ENSMUSG00000001655	0.0528011	0.0295393	0.0938265	0	0	0	0.839657	1.24694	1.07659	0	0	0	0.163222	0.0918267	0.220518	0	0	0	3.13743	3.01431	3.56048	0	0	0	1.84425	1.84742	2.08195	0	0	0.0148105	1.62328	1.44564	1.99078	0	0	0	0.142581	0.21677	0.280562	3.5923	3.33833	3.20792	0.0276672	0.0150994	0	2.32986	2.10917	2.38088
Gstt1	ENSMUSG00000001663	1.17426	1.32196	1.06501	1.27514	1.21975	1.11549	4.26164	4.11399	3.9075	1.17991	0.931275	1.5573	1.29954	1.09596	1.17059	0.479194	0.975508	0.618266	1.36626	1.07552	1.63346	3.11447	3.11257	2.76624	3.17369	3.2347	3.55623	2.31033	2.16272	2.08197	1.4674	1.73834	1.60302	2.59512	2.32275	2.64806	1.48862	1.4701	1.55001	0.743781	0.852342	0.755005	3.40627	3.70789	3.66088	2.03069	1.6673	1.79006
Gstt3	ENSMUSG00000001665	2.92633	2.93595	2.93423	0.699166	0.477188	0.95281	3.12632	3.22086	2.99392	0.97702	1.04653	0.888541	2.54684	2.4354	2.57662	0.998555	0.547296	0.454975	3.19063	3.17421	3.29442	1.7949	1.76101	1.66439	3.44134	3.46678	3.44551	1.8338	1.50176	1.55329	3.39177	3.41619	3.26217	1.60702	1.52963	1.41279	3.36772	3.2513	3.08978	2.86156	2.74113	2.934	2.00414	2.2418	2.12832	3.0948	3.50089	3.19714
Marveld3	ENSMUSG00000001672	3.32446	2.99699	3.08718	0.0485071	0	0.0165989	2.59584	2.66473	2.79745	0	0.0328064	0	2.9328	2.87116	2.8253	0	0.0696176	0.0622132	3.57807	3.65274	3.49207	0.030301	0.0158237	0.0923364	3.11443	3.17448	3.00012	0.0292206	0.0164547	0.0709063	3.12735	3.16468	3.18498	0.0316575	0.0149534	0.0937439	3.13851	3.29552	3.1885	3.51237	3.74995	3.74539	0.227317	0.312182	0.160342	3.19235	3.3271	3.38221
Ddx18	ENSMUSG00000001674	6.21408	6.39804	6.33114	6.67773	6.81579	6.69508	6.18306	6.31477	6.25143	6.53983	6.45362	6.48264	6.00825	6.1821	6.03206	6.75323	6.76795	6.67697	6.05612	6.19166	6.11318	5.9649	5.87556	6.02027	6.02792	6.14751	6.005	6.08557	5.92958	5.96302	6.1529	6.19264	6.11922	6.03996	6.04246	6.04449	6.22371	6.02132	6.09513	5.80157	5.80162	5.81433	5.58018	5.62045	5.61354	5.869	5.85923	5.73063
Gramd3	ENSMUSG00000001700	4.26125	4.37421	4.25807	4.01679	4.11295	3.97952	4.16516	4.23814	4.27193	3.84085	3.79517	3.8667	4.2518	4.05295	4.16462	3.88253	3.79739	3.7495	4.99189	4.94148	4.99312	4.07428	4.11001	3.93146	4.78135	4.75076	4.76529	3.83117	3.74088	3.74482	4.8138	4.77519	4.84165	3.78603	3.55893	3.68376	4.51935	4.48552	4.50992	5.06722	4.99954	5.00698	4.01096	4.18937	4.02431	4.78236	4.7998	4.83934
Eef1e1	ENSMUSG00000001707	6.57876	6.65079	6.80383	6.6604	7.08149	6.87376	6.75133	6.87312	7.03866	6.67405	6.6946	6.711	6.84599	6.77729	6.86965	6.50006	6.91793	7.09229	7.09444	6.9278	6.97842	6.02906	6.03757	6.09746	7.02673	6.95389	6.97574	6.08601	6.18942	6.24177	7.13787	7.05428	7.11213	6.27333	6.00388	6.29328	6.58238	6.53452	6.4791	7.09392	6.98363	6.91608	5.87532	5.86104	5.85117	6.99574	7.0892	6.98946
Il16	ENSMUSG00000001741	0.0524478	0.0651612	0.0102359	1.14604	1.16096	1.03751	0.0457443	0.0299603	0.0145624	0.898861	0.908773	1.01022	0.0503687	0.110679	0.0320101	0.78628	0.939619	0.97153	0.0663062	0.085314	0.024332	1.68924	1.61906	1.74536	0.176228	0.245103	0.169677	1.773	1.73283	1.58828	0.0590092	0.0485547	0.0714567	1.60783	1.5009	1.39358	0.116764	0.203007	0.090119	0.0265467	0.0425216	0.0590498	1.39912	1.55562	1.47386	0.0459808	0.0258985	0.0124138
Tcirg1	ENSMUSG00000001750	3.9687	3.96066	3.63421	3.62849	2.78006	3.25491	2.99008	2.80399	2.98591	4.08729	3.45104	3.72481	3.53541	3.76902	3.59227	3.77346	3.83177	3.57952	3.21615	2.97639	3.39529	4.32764	4.38469	4.10982	3.16851	3.60912	3.47774	4.24835	4.52903	4.26377	3.43132	3.64428	3.26877	4.23939	4.32799	3.98203	3.68948	3.74383	3.87719	3.97105	3.97871	4.23483	4.65373	4.80171	5.04404	4.1053	3.79062	4.36247
Naglu	ENSMUSG00000001751	2.46008	2.37102	2.36621	1.74358	1.49295	1.62686	2.03786	1.83799	1.6095	1.48159	1.56519	1.52844	1.68447	1.93145	1.80042	1.42618	1.42192	1.34023	1.72022	1.899	1.66667	1.88685	2.07635	1.5262	1.72668	1.94906	1.71702	1.84146	1.70654	1.81644	1.59452	1.6722	1.57298	1.83959	1.81659	1.56523	2.83279	2.87561	2.6194	1.57119	1.84469	2.10985	1.9376	2.02718	2.09217	1.92786	1.84161	2.01854
Smo	ENSMUSG00000001761	7.0862	7.04354	7.079	7.02371	6.52146	6.97321	7.14604	7.15277	6.94277	7.1571	7.16362	7.00538	6.9467	6.99364	7.04468	7.02277	6.97012	7.04873	7.09352	7.15141	7.24364	7.2298	7.27536	7.00015	7.15022	7.17168	7.1529	7.24317	7.14013	7.15246	7.16517	7.21531	7.24092	7.22905	7.25279	7.19388	6.98001	7.0204	6.98076	6.73738	6.76796	6.64043	7.04162	6.92764	6.91851	6.79923	6.82337	6.69591
Tspan33	ENSMUSG00000001763	3.50601	3.48326	3.53614	2.92262	3.16748	3.10114	2.45452	2.54264	2.52274	2.38585	2.15671	2.35988	2.08531	2.22437	2.28518	2.03974	2.02759	2.59842	1.8295	1.98963	1.90836	2.79681	2.59509	2.24605	1.84398	1.94995	1.71283	2.85831	2.65749	2.52761	1.58136	1.74716	1.43827	2.73943	2.38397	2.22769	3.56229	3.47799	3.52722	1.42428	1.43496	1.38408	1.54653	1.40728	1.40166	1.72434	1.37552	1.35773
Rin2	ENSMUSG00000001768	2.66313	2.64373	2.78239	4.46606	4.30942	4.60317	3.60979	3.73703	3.71417	3.31073	3.50533	3.42533	3.55291	3.61409	3.51797	4.00218	3.85896	3.94124	3.1101	3.00786	2.99253	4.59989	4.41008	4.16902	3.67596	3.82599	3.68485	4.34827	4.16185	4.34167	3.57861	3.49745	3.5881	4.62357	4.68559	4.41877	3.35879	3.29413	3.11016	3.11467	3.24581	3.23801	4.94505	4.91427	5.03775	3.39563	3.52967	3.4407
Pwp1	ENSMUSG00000001785	6.09553	6.13921	6.07483	6.49985	6.59545	6.56648	6.21346	6.16962	6.22686	6.45529	6.46572	6.39114	5.96704	6.06311	6.00147	6.46842	6.52412	6.58642	5.92734	5.85757	5.9975	6.06663	6.13071	5.97207	6.11709	6.10442	5.9906	6.16312	5.98316	6.12979	6.043	6.00247	6.11124	6.16385	6.07989	6.12103	5.89335	5.90602	5.80551	5.71467	5.67383	5.64225	5.71409	5.78935	5.68187	5.84295	5.86482	5.7455
Fbxo7	ENSMUSG00000001786	3.87713	3.85354	3.77776	3.76096	3.9726	3.74471	4.17887	4.06753	4.00571	3.50065	3.45975	3.43609	3.75402	3.79813	3.82863	3.32723	3.36648	3.24027	4.13903	4.14555	4.31522	4.02334	4.02838	3.78783	4.43639	4.31252	4.24286	4.01482	3.78387	3.95026	4.33249	4.23016	4.31909	4.15864	3.786	3.7923	4.33959	4.27768	4.17436	4.24325	4.2961	4.2632	3.88786	4.08366	3.97086	4.44696	4.59916	4.54406
Lrp3	ENSMUSG00000001802	5.43436	5.29069	5.3609	5.7471	5.63758	5.49709	5.71311	5.51198	5.07715	5.52475	5.35572	5.35125	5.48003	5.43561	5.60827	5.70357	5.40347	5.46146	5.23574	5.17938	5.56376	5.75629	5.8604	5.63623	4.92137	4.96527	5.00796	5.44689	5.4773	5.37922	5.17067	5.17828	5.21147	5.46643	5.37017	5.38343	4.83011	4.91241	4.91569	5.01916	4.98965	4.96829	5.76593	5.73988	5.75768	4.76526	4.60732	4.67202
Aif1l	ENSMUSG00000001864	6.18569	6.11019	6.21762	6.37508	6.40986	6.37533	6.37175	6.32502	6.23863	6.78065	6.73224	6.74994	6.34211	6.28477	6.32999	6.68878	6.49413	6.50978	6.03711	5.96033	6.09577	6.24762	6.34789	6.19856	5.88068	5.98406	5.9041	6.47915	6.31086	6.6187	5.88802	5.99523	6.03281	6.45777	6.3415	6.47603	5.64127	5.63215	5.68455	5.46687	5.59728	5.36543	5.99467	6.18989	5.88472	5.12644	5.11157	5.20745
Cpa3	ENSMUSG00000001865	0	0	0	0.057647	0.424262	0	0	0.0270423	0	0	0.115384	0.051364	0	0.0794009	0.025267	0.0380047	0	0	0.128792	0.0295436	0.0288975	0.832086	0.72425	0.65448	0	0	0.0598725	0.866839	0.81602	0.535099	0.092249	0.0291594	0.16563	1.2337	0.803555	0.808084	0.149314	0.0240555	0.0714668	0.167909	0.297466	0.354695	1.09424	0.974289	0.991093	0.0536266	0.528147	0.267095
Ltbp1	ENSMUSG00000001870	4.39867	4.48034	4.28026	3.43899	3.23054	3.4901	4.38449	4.23772	4.07834	3.11359	3.24126	3.03202	4.61076	4.76456	4.51212	2.53143	2.37305	2.65452	3.38423	3.54116	3.51304	4.44485	4.38096	4.14011	4.05406	4.18769	4.09607	5.06345	4.66973	4.64743	3.90555	3.96027	4.0132	4.55496	4.69264	4.46012	4.57144	4.65935	4.5867	2.74477	3.20841	3.3418	5.04959	5.28907	5.52832	3.79128	3.64991	4.02597
Kcnh6	ENSMUSG00000001901	0.649528	0.604922	0.501916	0.0350215	0	0.0934715	0.146052	0.157029	0.110179	0	0	0	0.084625	0.119297	0.122549	0	0.0124455	0.0115513	0.168842	0.104862	0.283136	0	0.0273212	0	0.153542	0.222102	0.163213	0.0322312	0.0224357	0.0106198	0.255289	0.0702694	0.114568	0.0262812	0.0260232	0.0227527	1.06477	0.92592	0.926204	0.209608	0.218594	0.152159	0.0198838	0.0516347	0.0211767	0.244237	0.280821	0.175816
Nacc1	ENSMUSG00000001910	7.19148	7.17506	7.17546	6.85397	6.44573	6.78715	7.11031	6.97405	6.65499	6.96012	6.80279	6.78522	6.87919	6.82481	6.96522	6.99149	6.92513	6.85256	6.6522	6.54598	6.65321	6.36257	6.4302	6.34277	6.68184	6.62917	6.52407	6.47068	6.46344	6.49528	6.70177	6.69491	6.6562	6.49997	6.50801	6.49827	7.01731	6.98334	7.0138	6.68595	6.61605	6.60843	6.08047	6.08086	6.03693	6.59504	6.63964	6.61835
Nfix	ENSMUSG00000001911	0.167503	0.096989	0.115504	0.153328	0.234613	0.120131	0.0174539	0.0280534	0.0260333	0.269804	0.279425	0.384442	0.0353017	0.192091	0.0302848	0.230931	0.215259	0.758504	0.339347	0.391541	0.176346	3.21669	2.86477	2.49311	0.583456	0.613113	0.862312	4.3297	3.79372	3.71223	0.697652	0.625796	0.414685	3.91725	3.76851	3.47147	1.66314	1.56137	1.35645	1.38394	1.91255	1.65045	5.33513	5.46119	5.27901	2.11863	2.54379	2.48114
Slc1a5	ENSMUSG00000001918	5.50263	5.4924	5.46053	5.43971	5.59316	5.33198	5.56191	5.24492	5.1711	5.50389	5.21796	5.2964	5.40454	5.34983	5.39716	5.00144	5.23423	5.10216	4.64479	4.6444	4.89685	4.74635	4.90523	4.48757	4.95085	4.98133	4.91152	4.92422	4.91355	4.85927	4.91526	4.92705	5.01543	4.51641	4.34476	4.29057	4.97676	4.93336	4.98479	5.09068	5.08152	5.15307	4.67169	4.66327	4.80262	5.45638	5.20895	5.40385
Vwf	ENSMUSG00000001930	0.533346	0.014093	0.182762	1.77911	1.96678	1.7864	0.158131	0.154507	0.186147	1.0732	0.799951	1.06739	0.10664	0.143976	0.0395765	1.53008	1.22487	1.42559	0.142926	0.186553	0.0767819	2.20815	1.82161	1.67832	0.239103	0.199306	0.585506	1.74862	1.52432	1.44329	0.109769	0.0305666	0.342484	1.84138	1.91151	1.51944	0.512537	0.530348	0.435392	0.116308	0.174652	0.141816	1.53783	1.53085	1.89722	0.0849559	0.0679411	0.0313416
Siae	ENSMUSG00000001942	2.49729	2.71851	2.45408	2.47071	1.91048	1.90779	2.74428	2.76389	2.80825	2.02634	1.85242	1.79533	2.71631	2.65871	2.59269	2.06895	1.83037	1.91263	2.6097	2.66533	2.6472	2.71181	2.50685	2.35983	2.85443	2.76508	2.71889	2.40268	2.14068	2.17603	2.5835	2.57244	2.54076	2.56972	2.3628	2.24451	2.82632	2.79526	2.61062	2.26377	2.3759	2.3805	2.93569	2.94502	3.03623	2.47285	2.71734	2.64195
Esam	ENSMUSG00000001946	0.160503	0.251294	0.108224	4.28401	4.32902	4.13068	0.312892	0.201899	0.107501	3.94888	3.72417	3.80265	0.233147	0.122959	0.189488	3.8394	4.00473	4.11204	0.192391	0.192858	0.290551	4.61401	4.68719	4.24045	0.193982	0.171843	0.193865	4.59239	4.43311	4.28466	0.17823	0.30433	0.354409	4.62042	4.57719	4.35801	1.33336	1.45757	0.660661	0.871584	0.766896	0.627859	4.4107	4.48096	4.60164	0.294704	0.173182	0.113006
Spa17	ENSMUSG00000001948	3.44938	3.60182	3.54697	3.54968	4.52337	3.85643	3.64828	3.65746	3.78281	3.36694	3.43749	3.34113	3.78851	3.87528	3.5808	3.83869	3.37175	3.37753	3.15609	2.9622	3.11598	3.21954	3.24902	3.15291	2.99426	2.84807	3.58461	2.68087	2.69813	2.80781	3.186	3.14949	3.37291	3.13954	2.91279	3.19153	3.54355	3.52735	3.53639	3.06551	2.99733	3.07654	3.08258	2.96255	3.35558	3.14203	3.2493	2.99089
Grik3	ENSMUSG00000001985	0.124809	0.0899348	0.130675	0.492184	0.349824	0.588998	0.0492562	0.0245634	0.0489833	0.287115	0.36683	0.32257	0.0260007	0.0243866	0.0115538	0.0558558	0.247482	0.191964	0.0118002	0.0173859	0	0.502276	0.422496	0.317594	0.00790439	0.00865291	0.0177442	0.228787	0.117875	0.218579	0	0.00433226	0.0128717	0.354172	0.251914	0.201383	0.111979	0.0729681	0.0914816	0.030928	0.0497906	0.0461189	1.21847	1.14625	1.19713	0.0617809	0.0388842	0.104808
Gria3	ENSMUSG00000001986	2.81718	2.99772	2.86718	2.51022	2.38593	2.53365	1.86612	1.89677	1.97549	2.18818	2.27484	2.26311	2.86977	2.96537	2.98047	1.54078	1.90973	2.05079	3.01479	3.04705	2.95903	2.58624	2.3939	2.19738	2.58762	2.48176	2.40042	2.45897	2.20958	2.24986	2.98955	3.06413	2.997	2.60916	2.51859	2.38617	2.42731	2.39825	2.32445	2.75891	2.79786	2.76836	3.60668	3.54751	3.48222	2.46438	2.36997	2.57345
Npas1	ENSMUSG00000001988	0.661077	0.669758	0.72089	0.0193814	0	0	0.047921	0.0179601	0.0709993	0.0198232	0.019609	0	0	0	0	0.025406	0.0661369	0.0188871	0.0864633	0	0.0381397	0.138562	0.091476	0.161102	0	0.0189926	0	0.0174096	0.0387665	0.0171326	0	0.0193541	0.0191123	0.21167	0.0352389	0.0916596	1.12515	1.09601	1.11012	0	0	0	0.124791	0.245339	0.124064	0.0181051	0	0
Sipa1l2	ENSMUSG00000001995	3.50767	3.469	3.4924	4.17706	3.39471	4.1993	4.22578	4.09176	3.91265	3.87921	3.85908	3.77605	3.37493	3.23257	3.3535	3.78226	3.70832	3.65334	4.35286	4.27314	4.25842	5.27768	5.23044	5.14033	4.0522	4.07413	3.96104	4.5604	4.4923	4.47322	4.3876	4.31401	4.1385	4.76279	4.94254	4.80551	4.05155	4.0388	3.854	4.83113	4.67329	4.68993	5.37691	5.33345	5.2594	4.20413	4.35177	4.2941
Blvra	ENSMUSG00000001999	2.87323	2.64956	2.85081	4.18762	4.55374	4.2399	4.25646	4.31825	4.49983	4.0931	3.98708	4.07296	3.75015	3.7585	3.7199	3.92095	4.05209	4.22754	4.95385	4.8322	4.75519	4.37144	4.55154	4.26321	5.06531	4.93473	4.82228	4.61149	4.454	4.498	5.02061	4.9942	4.99658	4.50641	4.20602	4.39512	3.66307	3.53751	3.41552	5.22921	5.15139	5.15876	4.52688	4.68403	4.66505	5.35658	5.36926	5.2123
Pdzd4	ENSMUSG00000002006	3.97782	3.81626	3.89663	3.91029	4.07506	3.93615	4.31391	4.19703	4.06861	3.89971	3.8385	3.83882	4.28876	4.20748	4.19121	3.99277	3.6744	3.70458	4.29859	4.28087	4.29627	4.91901	4.99685	4.89394	4.44761	4.44297	4.45534	4.80154	4.69577	4.65076	4.5635	4.57032	4.54322	4.87789	4.7553	4.81984	4.26935	4.26388	4.18165	4.3145	4.29761	4.21152	5.1246	5.07811	5.12774	4.42627	4.35429	4.34057
Pnck	ENSMUSG00000002012	3.59134	3.5079	3.46578	1.64121	1.82	1.78841	3.57403	3.28321	3.11293	1.98795	1.72768	2.0568	3.31232	3.41461	3.38603	1.64056	1.42775	1.335	3.60938	3.3624	3.59837	3.07922	2.9173	2.75201	3.34909	3.2254	3.34175	2.72481	2.72666	2.73589	3.30141	3.53006	3.38821	1.75057	1.83848	1.80886	4.2911	4.19346	4.15269	3.29331	3.27194	3.40048	3.19187	3.1851	3.32968	3.49557	3.32516	3.29875
Ltbp2	ENSMUSG00000002020	0.103082	0.210134	0.216634	0.0808822	0.0351754	0.24163	0.277177	0.360806	0.163857	0.148212	0.0505733	0.0156871	0.0952547	0.130402	0.0496589	0	0.0305362	0.239256	0.438443	0.376007	0.286072	0.19686	0.0675116	0.0944273	0.326381	0.33912	0.323691	0.226566	0.0536041	0.0518889	0.207173	0.700826	0.389373	0.11667	0.107064	0.16452	0.415225	0.213533	0.218699	0.632457	1.10324	1.03111	0.814838	1.03948	1.25192	0.677146	0.690469	1.06799
Tmem25	ENSMUSG00000002032	1.18139	1.18379	1.21938	0.671235	0.470743	0.936442	1.18926	0.874274	0.855729	0.629927	0.487933	0.680832	1.42145	0.939977	1.10809	0.458685	0.75843	0.583654	1.20792	1.00734	1.19093	0.905576	1.18412	0.941668	1.00765	1.08123	1.18831	1.06939	1.19214	1.03828	1.03816	1.02268	0.96656	1.03852	0.903754	0.851613	1.3534	1.44385	1.2733	0.783766	0.970629	1.03886	1.11535	1.15932	1.29623	0.713481	0.826487	0.954216
Trappc6a	ENSMUSG00000002043	5.57908	5.11889	5.15447	4.68911	5.05384	4.6827	6.1403	5.61235	5.41071	5.14151	5.05469	4.7768	5.63945	5.90695	5.86235	4.91834	4.62244	4.48472	5.81952	5.74476	6.10086	4.97444	5.36364	5.15388	6.12079	6.20313	6.29971	5.36523	5.31606	5.53489	6.0882	6.10879	6.29729	5.06612	4.99957	5.34049	5.72129	5.88522	5.86692	5.56369	5.5642	5.5687	4.19099	4.48101	4.33173	5.56643	5.64777	5.72096
Foxn1	ENSMUSG00000002057	0.33988	0.313679	0.450463	0	0	0	1.77541	1.49096	1.3987	0.0124955	0	0	0.726675	0.937524	0.882715	0	0	0	1.16933	1.34062	1.18874	0	0	0	1.456	1.43185	1.49745	0	0	0	0.82416	0.761771	0.837816	0.011897	0	0	0.541131	0.463673	0.553721	0.719493	0.79925	0.695927	0.0604691	0.0552104	0.00906533	1.69345	1.80436	1.63424
Rab34	ENSMUSG00000002059	5.60751	5.633	5.57024	6.24763	6.56272	6.18068	6.37515	6.30726	6.14125	6.64038	6.48186	6.47704	6.01069	6.11637	6.0012	6.4955	6.25207	6.33926	5.90972	5.98876	6.08719	6.58117	6.70022	6.42128	6.21037	6.28895	6.21359	6.87811	6.70788	6.91118	6.25098	6.25638	6.36164	6.76462	6.69356	6.7162	5.70471	5.64891	5.68768	6.13536	6.29785	6.09615	6.58218	6.74256	6.6871	6.36731	6.30601	6.47131
Ccne1	ENSMUSG00000002068	6.04019	6.4381	6.25165	7.35771	7.1135	7.37889	6.09979	6.22005	6.27809	7.25413	7.28065	7.17626	5.93782	6.16247	5.956	7.49136	7.35774	7.59026	5.32441	5.38562	5.45564	5.932	6.01931	5.91012	5.40591	5.11959	5.34822	6.47594	6.40445	6.42703	5.3575	5.48084	5.46014	6.22951	6.15455	6.217	5.55468	5.47492	5.50285	5.30071	5.11657	5.16052	5.3844	5.23227	5.19334	5.31947	5.28762	5.10997
Bbc3	ENSMUSG00000002083	4.11863	3.55374	3.60907	3.37173	3.53527	3.29267	2.94254	2.81214	2.58984	3.06765	3.33216	3.05574	3.6049	3.6245	3.51528	3.59478	3.08674	3.21459	3.4747	3.5321	3.83424	2.90177	3.04713	2.85273	2.76463	2.96953	2.85627	2.55177	2.7268	2.95583	3.31693	3.4812	3.30559	2.4269	2.40504	2.67694	3.84923	3.90104	3.7756	3.90296	3.63622	3.81247	2.69372	2.95833	2.51538	3.0731	2.88357	3.14417
Psmc3	ENSMUSG00000002102	8.37942	8.67019	8.75363	8.93024	8.97107	8.98212	8.4928	8.70627	8.79812	8.96853	8.80369	8.87882	8.56323	8.54525	8.68754	8.75404	8.85917	8.99178	8.0933	7.94345	8.10143	8.24181	8.35052	8.18293	8.09824	8.06786	7.93693	8.34799	8.19357	8.31398	8.11848	8.05431	8.12351	8.38582	8.2853	8.37609	8.27449	8.15836	8.05661	7.91348	7.86728	7.87508	8.18719	8.0609	8.19332	8.06932	8.17856	7.95887
Acp2	ENSMUSG00000002103	4.93537	4.85585	4.79093	4.89294	4.48156	4.70773	4.65691	4.5249	4.42864	4.67992	4.83972	4.76109	4.51098	4.75252	4.55466	4.87311	4.75769	4.76445	4.16639	4.11306	4.26068	5.02126	4.96272	4.70799	4.21524	4.27995	4.11406	4.82386	4.57051	4.6335	4.25624	4.25232	4.32124	4.80984	4.79944	4.72294	4.81039	4.82753	4.68253	3.98694	3.99543	3.99791	5.20624	5.12918	5.15177	4.01449	4.03381	3.8839
Rapsn	ENSMUSG00000002104	0.123157	0	0.119032	0.0581696	0	0.0743013	0.716555	0.401664	0.309595	0.621418	0.654132	0.604693	0.360519	0.455164	0.547068	0.283743	0.567588	0.445283	0.357037	0.144861	0.226141	0.134846	0.204481	0.067118	0.079992	0.324232	0.49891	2.34537	2.13342	1.75443	0.206852	0.224894	0.0877374	0.423806	0.104625	0.303981	0.0664244	0.130572	0.115803	0.245473	0.158284	0.208034	0.119002	0.079211	0.0217935	0.0839616	0.115854	0.201733
Slc39a13	ENSMUSG00000002105	3.72129	3.65731	3.62636	3.96932	3.4612	3.7983	3.7762	3.49847	3.22841	3.69706	3.6833	3.50546	3.7953	3.40718	3.43572	3.83988	3.8285	3.55053	3.39266	3.32693	3.4501	4.39776	4.53632	4.18709	3.64076	3.76345	3.42364	4.08667	4.20878	4.32833	3.606	3.57049	3.52307	4.4091	4.113	4.01854	3.70536	3.61142	3.97231	3.80131	3.93495	4.08366	5.10208	5.16029	5.21195	4.01109	3.82727	4.04361
Celf2	ENSMUSG00000002107	5.06939	5.30061	5.15428	2.40729	1.31983	2.72835	5.05922	5.3622	5.31027	2.52892	2.62064	2.70984	5.36586	5.42631	5.51033	1.83792	2.87053	3.12733	5.05385	5.06876	4.87468	3.28112	3.09534	2.917	5.36355	5.37285	5.18175	4.13334	3.8167	3.35274	5.41607	5.4012	5.28907	3.28655	3.36369	3.04903	5.14299	5.26268	5.14127	4.89226	4.91402	4.94584	3.80037	4.03173	3.86857	5.60304	5.63598	5.62734
Nr1h3	ENSMUSG00000002108	1.07193	1.02011	1.14991	1.03317	0.355418	0.493408	1.34527	0.881966	0.948096	1.09161	0.928983	0.814573	1.27116	0.79243	1.07353	0.582503	1.19448	0.896367	0.704343	0.695642	0.45472	1.05831	0.952375	0.855311	0.918036	0.544244	0.69271	0.692825	0.807117	1.24405	0.670228	0.511875	0.665375	1.40481	0.756429	0.99576	1.25918	0.963685	0.92964	0.480253	0.452537	0.548114	0.947287	0.922187	1.11907	0.37585	0.585981	0.414101
Ddb2	ENSMUSG00000002109	3.76793	3.95635	3.96419	2.52327	2.32697	2.56252	3.68699	3.5813	3.74172	3.10961	3.08925	3.32087	3.67559	3.81718	3.80547	3.26091	3.10903	3.10789	3.48383	3.505	3.55605	3.4814	3.41994	3.21009	3.89919	3.7235	3.72229	3.58536	3.61244	3.61639	3.64965	3.56543	3.68576	3.81766	3.49266	3.58118	3.87423	3.84144	3.82907	3.86246	3.83553	3.82676	4.04691	3.99182	4.07022	4.18006	4.11469	4.1101
Spi1	ENSMUSG00000002111	0.463899	0.532994	0.351413	2.43682	2.27706	2.64971	0.66496	0.27035	0.625472	1.32481	1.96318	1.73309	0.317237	0.0383688	0.252626	1.96202	2.45741	1.87054	0.659188	0.25438	0.274529	1.91371	1.55152	1.56346	0.197368	0.175337	0.453279	2.15041	1.44475	1.47603	0.327683	0.427563	0.509085	1.71589	1.17647	1.29351	1.34853	0.688143	0.638461	0.779624	0.252649	0.348244	1.6243	1.55039	1.53831	0.178451	0.22691	0.585498
Stat6	ENSMUSG00000002147	2.04612	2.02027	1.95564	2.80167	2.72517	2.80451	3.03807	2.72124	2.71629	3.0573	3.02323	2.8598	2.74902	2.91649	2.99894	3.04057	3.08319	3.10019	4.00801	3.94527	4.02457	3.24499	3.24277	3.0115	3.83646	3.75093	3.71985	3.18049	3.10727	3.10813	3.85487	3.82885	3.68681	3.18447	3.20341	3.04333	2.44167	2.34457	2.30254	4.38524	4.28021	4.4185	3.39465	3.32798	3.56593	4.16133	4.3768	4.39758
Clgn	ENSMUSG00000002190	0.79828	0.599676	0.84083	1.54636	1.57412	1.92683	0.399791	0.276046	0.324804	1.20809	1.47922	1.37246	0.404824	0.401084	0.354775	1.24999	1.24148	1.31295	0.303465	0.363863	0.426775	2.68156	2.57652	2.46676	0.364921	0.42427	0.532024	1.85906	1.59737	1.72486	0.501071	0.329233	0.335432	2.22729	2.25046	2.13767	2.21915	2.12798	1.97691	0.211593	0.298065	0.311637	2.4765	2.55599	2.29364	0.489393	0.701784	0.516612
Mov10	ENSMUSG00000002227	4.69511	4.66275	4.4299	4.20308	3.903	4.01029	4.65714	4.56002	4.34841	4.94846	4.86656	4.85549	4.57165	4.50959	4.55238	4.24315	4.24562	4.15511	4.24996	4.03842	4.05907	4.76711	4.63844	4.64044	4.7716	4.7429	4.54117	5.2765	5.2106	5.24537	4.5689	4.48557	4.48699	4.95188	4.87002	4.84093	5.51518	5.39127	5.30776	4.17525	4.32714	4.56566	4.53134	4.8338	4.81946	4.52001	4.63094	4.7835
Ppm1j	ENSMUSG00000002228	0.748452	0.619399	0.687296	0.872774	0.805804	1.15427	0.482686	0.609702	0.545519	1.02252	1.02564	1.32787	0.405313	0.571825	0.528879	0.682921	1.11795	1.0732	0.9471	1.0791	0.890973	1.1398	1.26887	1.09195	1.06094	0.713923	0.970845	1.19861	1.1174	1.20913	1.01368	0.938502	0.854273	1.26078	1.15789	1.14885	1.50166	1.17477	1.04461	1.28698	1.58188	1.54373	0.958312	1.35262	1.15193	1.50192	1.22139	1.47547
Rhoc	ENSMUSG00000002233	6.36881	6.31218	6.33231	7.19083	7.09074	7.00506	5.76477	5.57595	5.51262	7.65809	7.64113	7.65841	5.97035	5.90184	6.00885	7.42965	7.25641	7.31904	5.32898	5.12535	5.37861	6.93501	7.07034	6.76002	5.3716	5.50818	5.30048	7.21709	7.0837	7.31535	5.38701	5.35611	5.63088	7.23527	7.12157	7.20035	6.76459	6.68982	6.65034	5.46838	5.59161	5.61905	7.41659	7.54904	7.64225	5.27072	5.47685	5.46427
Tead3	ENSMUSG00000002249	5.95049	5.94967	5.93006	4.45404	4.10455	4.52016	6.54467	6.3466	6.02962	4.85801	4.58145	4.63875	6.38609	6.39618	6.66297	4.58505	4.29551	4.21233	6.21053	6.26519	6.38544	5.43675	5.43296	5.38224	6.19548	6.31951	6.17261	5.62133	5.47025	5.51131	6.21539	6.3205	6.20924	5.65027	5.53242	5.41788	5.88847	5.85313	5.96662	6.07564	6.15601	6.06122	5.96858	5.86994	5.89663	6.2077	6.07289	6.32868
Def6	ENSMUSG00000002257	1.56537	1.46223	1.52563	1.73541	1.81599	1.39109	2.40913	2.30137	2.1924	1.62652	1.44915	1.47333	2.31944	2.30904	2.32419	1.58334	1.53896	1.38836	2.72606	2.70267	2.67141	2.38926	2.50862	2.07473	3.05736	3.17645	3.17877	2.22587	2.11735	2.21279	3.31504	3.44728	3.27752	2.33941	1.87002	1.99029	2.09674	2.06175	1.96864	3.41072	3.58662	3.49249	2.7223	2.77998	2.84517	3.74473	3.67031	3.94082
Peg3	ENSMUSG00000002265	6.0662	6.21013	5.97798	6.54103	5.72476	6.44626	6.39257	6.51112	6.48346	8.36809	8.46802	8.36082	6.36422	6.5733	6.35683	7.53988	7.64048	7.55618	5.65302	5.79324	5.5476	6.5013	6.37474	6.32172	6.07861	6.18279	6.03054	8.27227	8.07241	8.13144	6.06021	6.08227	5.92856	5.78073	6.23347	5.88477	5.89121	5.99602	5.87859	5.66534	5.75146	5.86959	6.75389	6.74048	6.82143	5.87535	5.92578	6.0872
Zim1	ENSMUSG00000002266	2.1759	2.25623	2.1667	1.14109	0.490387	1.0314	3.04974	3.29563	3.32543	3.69713	3.92119	3.95474	3.17702	3.30736	3.39164	2.00649	2.31574	2.1069	2.02962	2.18399	1.8849	1.21408	1.0629	0.869034	2.82845	2.80952	2.67513	4.68243	4.3796	4.23522	2.49856	2.55121	2.57748	1.22217	1.34234	0.941171	1.45066	1.53621	1.49363	2.03906	2.02626	1.94568	2.48899	2.27927	1.95426	2.5761	2.33095	2.36765
Metrn	ENSMUSG00000002274	6.69733	6.54729	6.55533	7.83959	7.97715	7.72429	4.81558	4.49015	4.32048	6.81674	6.56231	6.59686	5.27579	5.10002	5.32029	7.71008	7.27758	7.19161	4.4269	4.33723	4.5956	6.11903	6.61725	6.54161	4.39909	4.56752	4.44193	6.01867	6.08281	6.09857	4.78622	4.90506	4.7949	6.36714	6.15318	6.55719	5.41964	5.52858	5.40302	4.14016	4.35354	3.79378	5.26584	5.61097	4.97255	4.29138	4.10428	4.1902
Angptl4	ENSMUSG00000002289	2.45605	2.34294	2.41963	5.18117	5.21803	5.1689	2.99441	3.07749	2.76253	4.91379	4.88136	4.90082	2.61434	2.93705	2.63709	5.04913	4.99552	5.03321	2.79391	2.68814	2.63129	5.36284	5.30526	5.1263	3.09146	2.90607	3.09198	5.16569	5.07459	5.1164	2.71028	2.5356	2.64622	5.22305	5.06894	5.1353	2.5064	2.61323	2.36992	2.4352	2.6088	2.42553	5.10452	5.32743	5.41821	2.67576	2.657	2.74085
Cd320	ENSMUSG00000002308	5.87338	5.89628	5.87224	5.45069	5.80048	5.59304	5.94181	5.64006	5.48516	5.80227	5.51576	5.5545	5.74346	5.69045	5.61997	5.63966	5.54611	5.63776	5.99036	5.77478	5.99902	5.57404	5.8464	5.62196	5.90337	5.98444	5.90174	5.5667	5.46197	5.61339	6.11655	6.08773	5.99308	5.73797	5.42392	5.77141	6.04685	6.06751	5.97514	5.45332	5.4361	5.37802	4.7559	5.07652	4.85978	5.38293	5.38869	5.40629
Rec8	ENSMUSG00000002324	3.75613	3.76834	3.77222	2.30662	1.61947	1.29051	1.91956	2.10591	2.14728	2.20928	2.42419	1.99737	3.07734	3.13367	3.13841	2.66293	2.28599	2.1534	2.72482	2.59506	2.95202	2.62223	2.38251	2.26421	1.72044	1.88344	1.90634	3.18408	2.98687	2.90706	2.77149	2.7749	2.89906	2.31561	2.09915	2.02499	4.04595	3.81618	3.96728	1.77403	1.79504	1.81717	1.66781	2.07089	1.91227	1.30101	1.34006	1.15993
Ncan	ENSMUSG00000002341	1.09355	1.02157	1.11689	0.309418	0.146671	0.23791	0.376946	0.183852	0.245605	0.336751	0.396231	0.364658	0.484551	0.328786	0.404428	0.330394	0.427921	0.232316	0.251852	0.312155	0.227437	0.845199	0.795703	0.696888	0.292689	0.25129	0.260187	0.525207	0.573399	0.568286	0.34524	0.277636	0.321098	0.837208	0.739281	0.697481	1.49023	1.48955	1.40448	0.0592451	0.106994	0.131597	0.686664	0.713003	0.831242	0.039412	0.0367634	0.0473593
Armc6	ENSMUSG00000002343	4.04148	3.77717	3.8635	3.8513	4.34089	3.93706	3.81073	3.60745	3.21392	3.89798	3.5372	3.73026	3.33395	3.2193	3.46357	3.66505	3.76806	3.65501	3.49419	3.5275	3.46909	3.8849	4.13698	4.04034	3.59759	3.48761	3.4146	4.03689	4.10379	4.16785	3.51657	3.51103	3.54218	3.96721	3.99502	4.08009	4.17813	4.21403	4.1452	3.13676	3.26873	3.35676	3.58577	3.85244	3.62394	3.38703	3.46145	3.28696
Slc25a42	ENSMUSG00000002346	1.48946	1.1841	1.38925	0.938926	0.613457	1.06855	2.1052	2.26979	2.21522	1.05311	1.01346	1.03252	2.22674	2.42688	2.53019	0.600018	1.01873	1.11184	1.28755	1.36995	1.15799	1.62667	1.48247	1.2665	1.55104	1.67394	1.56352	1.7194	1.66546	1.65722	1.53311	1.71255	1.32692	1.81453	1.74509	1.50294	1.54123	1.44194	1.40632	1.64174	1.84759	1.736	2.20591	2.22389	2.32136	2.19651	1.94167	2.1304
Bmp8b	ENSMUSG00000002384	1.53204	1.44301	1.41836	0.130433	0	0.0275166	1.6923	1.54348	1.55484	0.163528	0.0339481	0	1.36254	1.50562	1.53276	0.0877993	0.103648	0.0526573	2.1722	2.17677	2.14422	0.142357	0.0261033	0.106739	2.21396	2.17114	1.96806	0.131862	0.100888	0.129412	1.64072	1.57245	1.48566	0.0524479	0.0124858	0.0773621	2.06649	2.09142	2.01673	1.80252	1.97125	1.96551	0.125968	0.120384	0.126745	1.75829	1.91403	2.01068
Nr2f6	ENSMUSG00000002393	7.2097	6.79491	6.91373	6.13874	6.23555	6.15123	6.52428	6.32947	6.32073	6.10953	5.96576	5.98584	6.48903	6.39948	6.52031	6.45561	6.27624	5.91399	6.25101	6.7256	6.89347	5.85848	6.20913	6.12067	6.43231	6.88388	6.55449	5.72909	5.64527	5.85571	6.55271	6.54358	6.59612	5.89492	5.93121	6.06722	6.86388	7.01841	7.17325	6.30169	6.58137	6.01156	5.80732	5.84918	5.38599	6.42352	6.13038	6.45542
Ocel1	ENSMUSG00000002396	0.677837	0.3313	0.76045	0.598775	0.468033	0.411339	0.691124	0.81148	0.767675	0.885232	0.483053	0.433308	0.517399	0.539004	0.801476	1.55288	0.264605	0.631215	1.03368	0.937151	1.01718	0.934489	0.858116	0.839977	0.858784	0.978512	1.4481	0.744626	0.717731	0.78693	1.08339	1.01901	1.27213	0.912608	0.751983	0.956734	0.947157	0.989597	0.984778	1.13259	1.36919	1.42716	1.19237	1.26572	1.22196	1.31048	1.33877	1.42303
Dyrk1b	ENSMUSG00000002409	4.97753	4.91144	4.83192	4.06543	3.7162	3.86177	4.77721	4.67413	4.28878	4.49925	4.40383	4.32989	4.89525	4.84094	5.17363	4.21707	4.27355	4.14154	4.61631	4.69214	4.66815	4.59481	4.60212	4.4422	4.54564	4.7265	4.47095	4.44882	4.46158	4.47095	4.51785	4.55482	4.47097	4.48094	4.62341	4.4883	4.81795	4.90596	4.81805	4.2962	4.50428	4.20431	4.62251	4.61797	4.23122	4.14575	4.28343	4.34828
Hltf	ENSMUSG00000002428	4.40886	4.46364	4.41544	3.5507	3.43495	3.79426	4.48588	4.66503	4.7591	3.84688	3.9592	3.93375	4.53175	4.52487	4.48638	3.62246	3.88029	3.96153	4.74293	4.78526	4.65981	3.64141	3.42273	3.41561	4.78633	4.81587	4.89328	3.38594	3.38496	3.52966	4.72372	4.7479	4.74639	3.58886	3.50393	3.53731	4.52847	4.53779	4.27748	4.61876	4.58544	4.62123	3.44838	3.55537	3.65711	4.76367	4.74375	4.8539
Rgs20	ENSMUSG00000002459	2.78104	2.9168	2.64662	0.60052	0.76994	0.805848	0.216288	0.554267	0.377551	0.571833	0.317802	0.447757	0.849384	0.294523	0.207176	1.42321	0.556388	0.33288	0.184127	0.13493	0.255409	0.526589	0.259345	0.172197	0.0243222	0.0878924	0	0.139452	0.175855	0.2526	0	0.0231482	0.0520462	0.541865	0.217468	0.172855	3.28513	3.17085	3.21038	0.0769268	0.0200719	0.0186906	0.389525	0.601358	0.355629	0	0.0201598	0.0459533
Abhd3	ENSMUSG00000002475	1.51744	1.24997	1.39018	0.555828	0.269797	0.461752	1.49562	1.18262	1.18398	0.487164	0.321772	0.403202	1.61172	1.87463	1.80205	0	0.421041	0.484578	1.18109	1.12685	1.0153	0.481013	0.492917	0.627777	0.686048	0.78058	0.598743	0.3627	0.315381	0.270238	0.95968	0.977964	0.830372	0.326632	0.399202	0.265485	2.01931	2.02918	1.81596	0.840495	0.727238	1.01411	0.682786	0.600863	0.679445	0.829998	0.728392	0.856402
Snrpd1	ENSMUSG00000002477	8.52379	8.60637	8.4944	8.88898	9.37661	9.12951	8.63181	8.72842	8.88326	9.04287	9.43905	9.16214	8.46245	8.66867	8.53336	9.40723	9.09571	9.48863	8.36313	8.30662	8.40171	8.33946	8.46252	8.32171	8.42407	8.39637	8.47179	8.41929	8.35308	8.52056	8.43004	8.38509	8.6784	8.43719	8.35794	8.59813	8.2507	8.25805	8.16662	8.33094	8.40895	8.2977	8.08198	8.06373	8.16141	8.51163	8.44307	8.398
Tiam1	ENSMUSG00000002489	4.91255	5.02067	4.87871	4.54894	3.85933	4.44186	5.38271	5.29751	5.31773	4.78052	4.85594	4.6755	5.38898	5.54724	5.50396	4.71154	4.49787	4.53869	5.77841	5.71877	5.71835	4.74928	4.65549	4.47227	5.69174	5.69398	5.71185	5.03616	4.77733	4.81832	5.73713	5.63139	5.65662	4.56873	4.67012	4.53025	5.02331	5.03166	4.95352	5.74009	5.78817	5.74783	4.82023	4.81312	4.98199	5.61295	5.7042	5.78826
Slc9a3r2	ENSMUSG00000002504	3.49319	3.54567	3.61404	4.8628	5.01022	4.77435	3.97173	3.84609	3.76117	4.49809	4.29673	4.38092	3.59462	3.70062	3.91055	4.2953	4.3375	4.36497	3.76478	3.72359	4.00448	5.1792	5.27998	5.10358	3.894	3.82479	3.98614	4.9633	4.94544	4.94372	3.76421	3.75615	3.70863	5.0023	4.80867	4.81764	3.27978	3.41504	3.31776	3.92795	3.91817	3.93977	5.18062	5.32228	5.38647	3.61662	3.58579	3.62939
Scin	ENSMUSG00000002565	0.0478039	0.0266148	0.0729058	0.0149872	0	0	0.171238	0.215702	0.108604	0	0	0	0.145268	0.0122164	0.10003	0	0.0563337	0.0433042	0.115899	0.222912	0.101118	0.0684686	0.0288585	0.0145448	0.17619	0.113738	0.133983	0.189043	0.157798	0.0651187	0.208819	0.0518373	0.100638	0.402028	0.213347	0.208794	0.0783798	0.0608137	0.0493054	0.234113	0.300178	0.227381	0.81003	1.10548	0.843629	0.0553273	0.100514	0.0902223
Ikzf4	ENSMUSG00000002578	2.56872	2.28962	2.39402	2.51388	1.81032	2.30523	2.86486	2.79189	2.82052	2.23435	2.20937	2.47957	2.90581	2.9886	3.1532	2.26772	2.4612	2.31435	2.76809	2.72867	2.70193	3.07621	2.96353	2.91669	2.72223	2.60959	2.63878	2.83058	2.68146	2.61934	2.60704	2.52137	2.68028	2.91566	3.0614	2.5887	2.28233	2.24147	2.24484	2.71011	2.79095	2.598	3.40838	3.29699	3.36313	2.56103	2.5343	2.79745
Pon1	ENSMUSG00000002588	0.115367	0.0247419	0	0	0	0	0.429762	0.282213	0.283234	0	0.083198	0	0.217927	0.193634	0.396583	0	0	0	0	0	0	0.0784956	0.0268768	0	0	0.0272404	0	0.0494132	0.0279491	0	0.044633	0.0549908	0	0.0270367	0.148329	0.0268862	0.305822	0.396704	0.318975	0	0	0	0.0458233	0.0252674	0.060413	0	0	0.0276786
Axl	ENSMUSG00000002602	4.91706	4.60322	4.59109	3.84413	3.03458	3.43039	5.90699	5.65813	5.43537	4.49397	4.63712	4.57129	5.79795	5.76747	5.74693	4.70045	3.68814	4.13301	5.80709	5.81896	5.98032	5.24465	5.19443	5.01988	5.76392	5.6808	5.61194	5.79821	5.60195	5.52201	5.63749	5.65742	5.67646	5.41228	5.28252	5.11877	5.08237	4.99065	5.00393	5.34718	5.35231	5.34584	6.01663	6.02869	5.95626	5.35352	5.55544	5.41944
Tgfb1	ENSMUSG00000002603	2.10448	1.84576	1.83298	3.44291	3.6567	3.57461	3.04334	2.92138	2.88751	3.47835	3.18481	3.2615	2.38219	2.31666	2.60037	3.36871	3.44741	3.4948	3.14185	3.21484	3.19979	3.62396	3.69256	3.45884	3.23369	3.23327	2.90063	3.77151	3.44782	3.55582	3.15191	2.91854	2.98629	3.79732	3.60694	3.52786	2.72674	2.7961	2.70651	3.81042	4.04408	3.65594	3.98096	4.03057	3.78566	4.15027	3.50821	4.08413
Zfp40	ENSMUSG00000002617	2.9083	3.00956	2.83735	3.24778	3.7363	3.43591	2.76039	3.11021	3.3053	3.35896	3.5403	3.49161	2.81732	2.90474	2.91642	3.44544	3.34021	3.67181	3.021	3.00984	2.84377	3.77356	3.49237	3.44422	2.92305	2.85301	3.1446	3.59158	3.51909	3.44124	2.94421	2.96551	2.92269	3.83132	3.74079	3.75738	3.00452	3.02387	2.83282	2.84593	2.68082	2.6524	3.81086	3.498	3.65791	2.91125	2.86183	2.7932
Akap8l	ENSMUSG00000002625	4.44877	4.38239	4.36367	4.19548	4.20199	4.24289	4.41391	4.40173	4.34827	4.16386	4.22351	4.18862	4.45673	4.62251	4.60256	4.35825	4.32993	4.31842	4.29	4.2543	4.3665	4.61826	4.48215	4.41326	4.48984	4.37708	4.54392	4.22997	4.13439	4.20599	4.33199	4.35787	4.47572	4.53638	4.46813	4.27326	4.43238	4.43332	4.39615	4.40982	4.48202	4.63273	5.10394	5.07892	5.29808	4.52147	4.5658	4.66371
Shh	ENSMUSG00000002633	2.09558	1.7587	1.85624	0	0.0436812	0.0149857	5.39585	5.73584	5.91541	0.0882481	0.0148719	0	4.00223	3.91406	4.07444	0	0.0629771	0.014359	4.34769	4.20495	4.22692	0	0	0.0425595	5.49059	5.6504	5.2923	0	0.0295534	0.17291	4.17202	4.07774	4.12145	0	0	0.0285107	2.10098	2.06355	1.8626	5.05146	5.72802	5.57764	0.107648	0.0401866	0.0217789	5.1569	4.62199	5.04126
Dennd1c	ENSMUSG00000002668	3.29414	3.36491	3.38192	0.274766	0.0620827	0.393842	3.48387	3.34431	3.1555	0.253277	0.123116	0.210346	3.47533	3.46805	3.64313	0	0.298542	0.133156	2.53484	2.32219	2.41629	0.318136	0.187618	0.354553	2.85367	3.02373	2.94084	0.260883	0.366141	0.28067	2.60602	2.78273	2.85434	0.318632	0.277342	0.342359	3.43689	3.49794	3.56932	2.20405	2.30465	2.23625	0.501454	0.426039	0.459838	2.63129	2.5017	2.91377
Prkd1	ENSMUSG00000002688	3.30638	3.33162	3.28288	3.31693	3.37904	3.28228	1.96139	1.89285	1.94891	3.33191	3.28861	3.18944	2.36192	2.40547	2.3332	3.51119	3.39878	3.3728	1.61315	1.56522	1.72183	3.70207	3.71936	3.6378	1.34097	1.46484	1.44081	3.26194	3.26776	3.3115	1.60737	1.71372	1.83837	3.53885	3.62418	3.51023	3.58252	3.55999	3.54346	0.937954	1.04817	0.952791	3.38988	3.50279	3.32891	0.978029	1.03019	0.949395
Lcp2	ENSMUSG00000002699	0.080352	0.136314	0.213429	1.22891	0.876006	1.35256	0.0707648	0.0178374	0.0525525	0.965308	1.15188	0.923506	0.0510109	0.239191	0.179297	1.5846	1.03761	1.37491	0.136238	0.134977	0.150353	1.36271	1.34598	1.1585	0.121511	0.28395	0.173869	1.17683	1.13721	1.10968	0.123331	0.0935238	0.19887	1.10212	1.18255	1.04373	0.560234	0.434382	0.470567	0.363024	0.475885	0.391239	1.02174	0.965451	0.877743	0.21588	0.135327	0.197492
Cse1l	ENSMUSG00000002718	7.57901	7.68241	7.58371	7.86993	8.15843	8.0919	7.64144	7.61305	7.95581	7.89979	8.05646	8.08837	7.44028	7.60534	7.35693	7.92587	8.20922	8.24687	7.36805	7.28678	7.34078	7.5619	7.43869	7.35495	7.39969	7.30219	7.32681	7.40696	7.32498	7.49437	7.31426	7.32784	7.41034	7.45563	7.51834	7.44313	7.38185	7.40629	7.27531	7.18075	7.12809	7.10439	7.10891	7.01555	7.09607	7.22526	7.34401	7.15529
Fkbp7	ENSMUSG00000002732	1.86342	1.96533	2.28016	4.66798	5.03548	5.16737	3.31629	3.37608	3.4304	4.76728	4.72819	4.8628	2.9987	3.02439	2.84749	4.56905	4.65109	4.99698	3.6602	3.3544	3.48507	5.40566	5.43733	5.23764	3.81923	3.66547	3.88532	5.30086	5.25643	5.3097	3.63658	3.6639	3.79054	5.34499	4.96519	5.3166	2.53201	2.58321	2.28069	4.26996	4.00712	4.04252	6.06552	6.10383	6.20661	4.2695	4.18399	3.9977
Gnmt	ENSMUSG00000002769	1.43488	1.74968	1.3343	0.343478	0	0.159748	1.65446	1.45763	1.3178	0.304004	0.0877368	0.184905	1.28632	1.34243	1.10757	0	0.338953	0.200346	0.876803	0.846739	1.04008	0.219225	0.305014	0.270304	0.758094	0.751107	0.82161	0.233029	0.358308	0.145878	0.634794	0.83334	0.758811	0.235875	0.21498	0.0822575	1.39002	1.0669	1.28209	0.93749	0.553562	0.840093	0.201643	0.351118	0.176985	0.680241	0.893581	0.752322
Grin2d	ENSMUSG00000002771	0.251753	0.233074	0.247901	0.198512	0.223339	0.176016	0.251299	0.37824	0.243239	0.170558	0.216997	0.114992	0.196272	0.149803	0.201342	0.383788	0.190218	0.186829	0.198651	0.23735	0.313605	0.647629	0.585747	0.500713	0.299697	0.28211	0.185454	0.519804	0.363556	0.279131	0.162361	0.191368	0.207334	0.520086	0.399542	0.426182	0.372797	0.441441	0.30282	0.445273	0.392491	0.479793	1.10848	1.16432	1.21645	0.373794	0.265646	0.380723
Ggct	ENSMUSG00000002797	2.34349	2.41015	2.26864	2.93184	3.98199	3.30441	2.40723	2.17003	2.6124	3.00219	2.77128	2.44044	2.11524	2.41308	2.24572	3.10317	2.93098	2.89951	2.28091	2.21922	2.20279	2.62561	2.46541	2.60741	2.58105	2.44863	2.71929	2.53754	2.45556	2.27748	2.56957	2.46938	2.59344	2.67875	2.29012	2.39825	2.69896	2.58674	2.51506	2.42405	2.56081	2.45357	2.92326	2.93065	3.16589	2.94227	2.55017	2.43019
Jag2	ENSMUSG00000002799	5.44025	5.18332	5.29586	1.16774	0.970664	1.28364	6.3709	6.214	5.88252	0.909398	0.897006	0.916955	6.20541	6.19585	6.30669	0.942848	1.19216	1.01133	6.49738	6.55434	6.74392	1.6066	1.46424	1.41595	6.43074	6.61813	6.50575	1.42914	1.38686	1.23006	6.52377	6.61886	6.51358	1.52255	1.35948	1.20601	5.46723	5.50673	5.48241	6.16277	6.31735	6.26966	1.9119	2.18105	1.87721	6.21014	6.11283	6.36454
Nudt14	ENSMUSG00000002804	6.3437	5.96014	6.09534	4.68404	4.91784	4.56984	6.681	6.45696	6.28836	4.73212	4.76442	4.78835	6.35291	6.30689	6.31103	4.60702	4.43853	4.29935	6.39908	6.11933	6.46006	4.95331	5.23189	5.08952	6.64524	6.55283	6.59084	5.35383	5.26573	5.38679	6.65195	6.61818	6.69494	5.20409	4.86621	5.1282	6.40361	6.39867	6.41572	6.30962	6.36468	6.4246	4.88283	5.25047	5.17564	6.48766	6.44271	6.46193
Epdr1	ENSMUSG00000002808	3.23828	3.0924	3.3118	3.06285	2.91862	3.29285	2.19633	2.1637	2.3057	2.85842	2.69736	2.83392	2.71036	2.62663	2.64872	2.79902	3.08029	3.05651	2.86081	2.8268	2.88298	3.3075	3.24635	3.03283	2.7428	2.72917	2.81372	3.01923	2.77557	2.89924	2.93876	2.88846	2.97364	3.38088	3.22854	3.33504	4.17023	4.08212	3.9662	2.86665	2.90432	2.89233	4.003	4.08991	3.99254	2.70487	2.87673	2.75617
Atg4d	ENSMUSG00000002820	4.39895	4.12655	4.28911	3.70087	3.96444	3.71421	4.53656	4.24346	4.15993	3.58268	3.62522	3.65256	4.21594	4.3223	4.26977	3.92399	3.7381	3.67561	4.379	4.28465	4.548	3.80724	4.01836	3.79065	4.54275	4.49098	4.40831	3.80129	3.75311	3.81972	4.41608	4.39717	4.48163	3.9498	3.76367	4.04341	4.60058	4.61325	4.49001	3.90216	4.18286	3.98196	3.27663	3.45054	3.27487	4.23394	4.34322	4.26397
Qtrt1	ENSMUSG00000002825	5.17704	5.137	5.12052	5.20274	5.22641	5.01776	5.61516	5.47151	5.12876	5.27016	5.2025	5.15071	5.16227	5.25069	5.23276	5.26383	5.18672	5.15141	4.70948	4.62193	4.82883	4.49483	4.75135	4.56986	5.06797	5.01217	4.8881	4.83701	4.89223	4.86171	4.99591	4.96183	4.87099	4.71503	4.60928	4.76111	4.96394	4.96779	4.93842	4.51535	4.69637	4.61614	4.29247	4.42116	4.29306	4.89054	4.8732	4.80171
Adprh	ENSMUSG00000002844	6.89064	6.85548	6.89191	7.56049	7.60577	7.51868	6.67051	6.56118	6.43046	7.33147	7.22836	7.24004	6.64011	6.57676	6.66211	7.45157	7.41805	7.37803	6.97199	6.83442	6.99505	7.64206	7.80197	7.69944	6.90803	6.88815	6.88675	7.46633	7.42678	7.5058	7.00606	6.98608	7.03142	7.74088	7.60672	7.80392	7.03083	7.06884	7.0701	6.78119	6.82976	6.95499	7.22417	7.37814	7.38548	6.7636	6.82352	6.86238
Tpra1	ENSMUSG00000002871	4.66929	4.68667	4.66833	4.16443	4.10492	4.33169	4.97803	4.72468	4.53192	4.44029	4.16991	4.37495	4.98157	4.7661	4.90387	4.19498	4.13035	4.0667	4.84424	4.59017	4.80854	4.8826	5.03442	4.65638	4.85435	4.78187	4.82953	4.98276	4.86248	4.7933	4.88531	4.88398	4.78952	4.93922	4.83015	4.78418	4.90056	4.93837	4.98635	5.02657	5.09056	5.21558	5.21125	5.26537	5.3492	5.08104	4.89734	5.1008
Nab1	ENSMUSG00000002881	4.0103	3.95401	4.00471	3.13114	3.61825	3.02596	3.49385	3.4002	3.54439	3.18419	3.31754	3.21804	3.35063	3.54477	3.62566	3.00668	3.32536	3.70491	4.09718	4.08229	4.05443	3.10658	3.11246	3.02603	3.85251	3.80991	3.69795	2.98713	3.03318	2.91927	3.7458	3.78109	3.64911	3.46573	3.19773	3.21519	4.07802	4.06002	3.99725	4.48767	4.31504	4.35817	3.64375	3.84594	3.42063	4.15495	4.35019	4.06116
Cd97	ENSMUSG00000002885	0.587459	0.429837	0.81059	4.42639	3.55723	4.17746	0.37836	0.595323	0.38131	2.90838	2.8564	2.92427	0.216708	0.186507	0.284129	3.3909	2.89844	3.0136	0.520961	0.515403	0.299392	5.18935	5.24999	5.04905	0.269044	1.01894	1.10579	4.29458	4.17793	4.14542	0.193991	0.23448	0.269854	4.27522	4.36011	4.1215	1.37759	1.4103	0.904736	0.770308	1.10071	1.08848	5.25833	5.06081	5.22539	1.25344	1.02175	0.59846
Il17ra	ENSMUSG00000002897	2.16821	2.09292	1.99846	1.30693	0.855048	1.13191	1.92763	1.74621	1.65825	1.07204	1.19383	1.15848	1.61837	1.83893	1.79908	1.07502	1.3838	1.16116	2.25316	2.11706	2.29759	1.44923	1.37156	1.22763	2.18922	2.18021	2.09015	1.59164	1.34596	1.42808	2.04677	2.19318	2.01285	1.5322	1.40676	1.34724	2.27547	2.32617	2.26308	2.08438	2.1952	2.26236	1.65508	1.5903	1.7788	2.17985	2.18958	2.1785
Lamb1	ENSMUSG00000002900	5.9117	5.90643	5.71211	4.7531	4.54943	4.66791	6.83336	6.74529	6.62463	4.75562	4.9522	4.74026	6.68295	6.77596	6.57396	4.81386	4.79834	4.67751	7.04525	7.118	7.13148	5.40975	5.21602	5.03946	6.9149	6.99263	6.95226	5.69673	5.30039	5.39922	6.94809	6.90404	6.8644	5.17916	5.28792	4.97885	5.83826	5.94489	5.88207	6.83457	7.06896	7.26621	5.69151	5.89348	6.14881	6.73334	6.65517	6.92122
Kcnn1	ENSMUSG00000002908	2.45162	2.31157	2.30724	0.917904	0.860385	1.14287	1.20296	1.07038	0.962503	1.13425	0.974875	0.882327	2.0237	1.97524	2.06409	1.31043	0.825531	1.06814	1.96729	1.97081	2.08334	1.6184	1.68867	1.50701	1.60622	1.47338	1.55377	1.67364	1.79655	1.65228	1.88572	2.11166	1.96549	1.83771	1.66438	1.73272	2.46503	2.38179	2.53779	1.63706	1.608	1.65769	2.06003	2.11064	2.16828	1.71568	1.81153	1.75453
Ppp1r17	ENSMUSG00000002930	2.10105	2.21785	2.25586	0.604166	0.799148	0.736318	0.120793	0.276574	0.0686022	0.255171	0.0492425	0	0.214659	0.329507	0.183869	1.06125	2.59124	0.447811	0.627091	0.648416	0.883644	0.248458	0.196494	0.258972	0	0.0244808	0.0251449	0.226227	0.174441	0.202759	0.0975993	0.163137	0.0717579	0.785207	0.0220705	0.0462013	2.50042	2.61565	2.59076	0.105379	0.14559	0.0787996	0.343174	0.469086	0.137114	0.0233659	0	0
Cd36	ENSMUSG00000002944	2.38157	2.37226	2.53047	0.130643	0.253719	0.247727	0.71467	0.794581	0.794037	0.0916388	0.156869	0.127835	1.30567	1.50303	1.20462	0.172221	0.437152	0.391485	1.7684	1.81757	1.74418	0.455893	0.372747	0.433278	1.07696	0.949146	1.07479	0.254867	0.303339	0.300847	1.14395	1.01083	1.02027	0.370076	0.269457	0.2185	2.93578	2.83015	2.82336	1.45812	1.22916	1.30789	0.590002	0.488216	0.355369	1.26718	1.52168	1.48818
Bcam	ENSMUSG00000002980	7.86735	7.61482	7.74195	2.61418	2.93525	2.60159	8.96545	8.74741	8.47188	2.68351	2.6349	2.68872	8.53969	8.52345	8.57923	1.10307	2.21762	1.37171	8.78259	8.76772	8.94505	2.16081	2.20139	2.07847	8.6933	8.70756	8.66825	2.38044	2.00279	2.28697	8.60173	8.63756	8.59586	1.95769	1.65828	2.11794	7.55021	7.54588	7.61982	8.75976	8.90873	9.08358	2.80422	3.07064	2.9223	8.67973	8.70367	8.92985
Relb	ENSMUSG00000002983	1.16222	0.976847	0.960082	1.47565	1.40216	1.43395	1.17769	0.838786	1.06838	1.73498	1.49313	1.63657	1.57129	1.62369	1.59512	2.0033	1.41087	1.20714	2.18197	2.09861	2.0583	2.04326	1.96245	1.8402	1.90538	1.98065	1.81671	2.15577	2.11001	2.06843	2.92895	2.72832	2.61774	2.24711	1.95693	2.19786	1.14161	1.23308	1.05299	3.0232	3.11825	3.09794	2.23193	2.34037	2.31408	2.64551	2.60543	2.82072
Apoe	ENSMUSG00000002985	6.77965	6.60901	6.62888	6.20375	6.32007	6.06539	6.29074	6.04678	5.76724	5.88357	5.97581	5.8263	6.65341	6.72558	6.67054	6.39976	6.08007	6.08998	6.41677	6.26645	6.47845	6.38342	6.42431	6.19992	5.64626	5.74971	5.73373	6.03418	6.09719	5.92716	6.49917	6.67944	6.52121	6.03265	5.88089	5.96621	6.56082	6.52987	6.59799	6.77129	6.81824	6.96353	6.28149	6.33522	6.21695	5.77586	5.9803	6.092
Prkar2b	ENSMUSG00000002997	4.58321	4.70173	4.63897	6.16293	6.2264	6.2976	4.61773	4.62237	4.78816	5.70484	5.78252	5.69552	4.5848	4.63882	4.59554	5.78462	5.84469	5.95867	4.99299	4.95016	4.94931	5.94772	5.98278	5.89875	5.04115	5.0963	5.03849	5.58625	5.5684	5.62165	5.04142	5.00335	5.02636	5.60713	5.55564	5.59823	4.49711	4.46134	4.48173	4.87538	4.78348	4.81365	5.51092	5.60826	5.52055	4.66978	4.71094	4.72131
Klf4	ENSMUSG00000003032	2.71869	2.37272	2.37051	2.30037	1.3227	1.79718	2.63149	2.57946	2.67929	1.68529	1.61937	1.71702	3.54106	3.14194	3.02457	1.70225	1.437	1.22071	5.5727	5.72993	5.61791	5.26967	5.16163	4.8891	4.36088	4.57774	4.28827	5.12869	5.21954	5.06262	4.60302	4.95486	4.43899	4.86617	4.50779	4.35833	2.53307	2.61903	2.78202	5.68278	5.53671	5.27939	6.06405	6.29297	5.9707	4.39253	4.4949	4.14503
Ap1m1	ENSMUSG00000003033	5.84644	5.86193	5.79391	6.48146	6.24045	6.45368	5.65768	5.60174	5.3764	6.4726	6.54791	6.39272	5.58294	5.47632	5.72167	6.45533	6.3538	6.43946	5.47399	5.5074	5.56562	6.49327	6.50749	6.40825	5.48742	5.39005	5.40405	6.51267	6.36959	6.5028	5.48529	5.49732	5.5476	6.66343	6.59058	6.59897	5.78799	5.85593	5.76871	5.61739	5.6163	5.71194	6.45261	6.44954	6.63394	5.56492	5.60564	5.62183
Elf3	ENSMUSG00000003051	3.9174	3.77628	3.74534	2.15621	2.19094	2.22167	3.54489	3.38054	3.24225	2.13296	1.86646	2.06512	3.80181	3.70567	3.58816	2.18274	2.19226	2.41844	3.56836	3.3297	3.60572	2.05718	2.23789	2.24631	3.42378	3.54972	3.41983	1.47089	1.53049	1.85154	3.42648	3.5427	3.54683	1.73594	1.72181	1.91963	4.41015	4.42062	4.37048	3.12099	3.27166	3.3578	1.63363	1.59767	1.57984	3.10383	3.19145	3.28148
Efna2	ENSMUSG00000003070	5.66347	5.61884	5.6876	6.51683	6.15422	6.42719	5.48504	5.41333	5.19029	6.36402	6.35775	6.18291	5.3876	5.3355	5.61281	6.34269	6.36734	6.3195	5.06361	5.05016	5.13225	6.29712	6.4478	6.09416	5.28524	5.4844	5.13118	6.1037	5.97251	6.1471	5.26119	5.24732	5.35439	6.22764	6.12242	6.24641	5.48107	5.55556	5.49621	5.17727	5.41523	5.23059	6.41839	6.51312	6.42714	5.26273	5.34374	5.49884
Ppp5c	ENSMUSG00000003099	7.04475	6.95309	6.99798	7.36945	7.07636	7.40192	7.13628	6.84985	6.72709	7.40774	7.19966	7.14118	6.87227	6.80761	7.00653	7.40297	7.19736	7.33546	6.43474	6.27186	6.32461	6.60918	6.70428	6.55329	6.39968	6.31109	6.22182	6.6447	6.55009	6.58081	6.45632	6.40641	6.51849	6.76358	6.53967	6.60545	6.47404	6.45747	6.46779	6.78754	6.80292	6.84797	6.86516	6.79717	6.90352	6.6307	6.79713	6.85347
Lipe	ENSMUSG00000003123	3.35734	3.44011	3.24518	2.9466	2.64599	2.7999	3.9925	3.92035	3.44424	2.91482	2.93659	2.73005	3.45962	3.49649	3.62566	3.1166	3.03028	3.07347	2.6846	2.58271	2.79436	3.29738	3.30372	3.21933	2.69635	2.89969	2.71073	3.38307	3.27819	3.24217	2.81781	2.89381	2.96217	3.37179	3.25663	3.42106	3.12861	3.24192	3.18672	2.30738	2.31669	2.3677	3.16853	3.22649	3.33719	2.68555	2.68967	2.675
Tbc1d8	ENSMUSG00000003134	2.51464	2.44948	2.44887	1.36401	2.2133	1.85522	3.38565	3.28521	3.18536	1.41047	1.43529	1.46513	3.30783	3.12441	3.18833	1.5335	1.50503	1.56137	3.47003	3.33665	3.35796	1.49372	1.58851	1.66113	3.79639	3.79796	3.64281	2.08308	1.98337	1.92427	3.36793	3.31582	3.30131	1.40357	1.6839	1.29316	2.93399	2.90184	2.81938	3.55922	3.53876	3.56682	1.51892	1.68655	1.95037	3.8509	3.65796	3.98464
Slc2a3	ENSMUSG00000003153	7.46383	7.47581	7.63454	2.58349	2.57036	2.87258	8.3304	8.28688	8.30821	2.95783	3.04166	3.03422	7.70954	7.75902	7.6711	2.56412	3.35948	2.99333	8.80901	8.87673	9.04051	3.44829	3.31512	3.1738	8.12991	8.14946	8.29782	3.44428	3.12718	3.2686	8.23828	8.1326	8.05003	3.26989	3.22059	3.17514	4.27101	4.37705	4.61233	8.00808	8.01596	8.1944	3.37052	3.29921	3.33115	7.56117	7.85575	7.82738
Foxj2	ENSMUSG00000003154	2.53264	2.50155	2.54227	2.67364	2.28448	2.72765	2.86381	2.64376	2.54975	2.64156	2.56228	2.6135	2.77251	2.70855	2.7634	2.51578	2.58933	2.6491	3.12473	3.09375	3.15326	3.6698	3.435	3.20815	3.04033	3.055	2.93367	3.40315	3.02665	3.21188	3.07907	2.91905	2.96111	3.42065	3.34252	3.11992	2.78262	2.69455	2.54331	3.28548	3.31963	3.31628	4.15283	4.0993	4.15471	3.20791	3.26825	3.37295
Mical3	ENSMUSG00000003178	3.20871	3.32167	3.2837	3.31344	1.73378	3.45628	3.44031	3.5001	3.34734	2.94763	2.99407	2.82935	3.39009	3.53127	3.45377	3.0821	3.13893	3.11974	3.37635	3.4013	3.20067	3.09285	3.06963	3.00057	3.54601	3.47917	3.45348	2.79835	2.77263	2.71532	3.47009	3.50892	3.43092	2.61415	3.01368	2.67092	3.46425	3.36288	3.09397	3.14827	3.02664	3.13754	2.91424	2.80378	2.42814	3.13219	3.24034	3.0639
Edar	ENSMUSG00000003227	1.74327	1.53182	1.73658	0.0424823	0	0.0217179	1.78392	1.69496	1.59225	0.0750828	0.144022	0.0926952	2.1289	2.12612	2.04447	0.014128	0.0994221	0.0514022	2.74909	2.54451	2.5157	0.0875057	0.0711602	0.158289	3.06755	2.852	2.83808	0.0475687	0.17339	0.145105	3.66165	3.48934	3.36985	0.0514741	0.113628	0.0614375	2.38583	2.33713	2.31497	4.07173	3.99291	3.99819	0.337002	0.3494	0.346238	3.23733	3.54231	3.38836
Grk5	ENSMUSG00000003228	4.12923	4.17897	4.04199	4.06128	3.77627	4.02614	2.77829	2.93274	2.96615	3.81949	4.01157	3.85853	2.66737	2.77972	2.58361	3.57831	3.61827	3.86069	2.46908	2.38252	2.4947	3.9631	3.8914	3.70642	2.16537	2.26989	2.30964	3.23107	3.08744	3.1	2.42555	2.5225	2.5237	3.17944	3.31616	3.21359	4.38254	4.28611	4.23177	2.02175	2.14995	1.90869	3.58518	3.53409	3.48617	1.86967	1.68841	1.76887
Eif2b5	ENSMUSG00000003235	6.42588	6.34155	6.24891	6.32231	7.10667	6.41789	6.3804	6.25635	6.25047	6.4033	6.54739	6.36707	6.1049	6.24162	6.11711	6.57286	6.3926	6.47782	6.20531	6.14264	6.3331	6.20917	6.32059	6.13745	6.31244	6.2829	6.28946	6.2176	6.1119	6.25236	6.28727	6.28531	6.32635	6.28393	6.28147	6.32427	6.39399	6.33841	6.30833	5.85218	5.88565	5.90827	5.6228	5.69567	5.74424	5.91644	5.94782	5.93109
Sult2b1	ENSMUSG00000003271	3.10477	3.13353	3.24577	0.387821	1.46564	0.844465	3.07366	3.34582	2.96699	0.389342	0.109463	0.295417	3.21529	3.57261	3.35665	0	0.527723	0.636679	3.61568	3.4747	3.83796	0.280669	0.230884	0.518554	2.69139	2.62543	2.97835	0.249005	0.398764	0.18545	3.09182	3.23491	3.43008	0.201221	0.349278	0.245285	2.79118	2.70027	2.60689	3.16966	3.24995	3.24024	0.572284	0.802752	0.69165	2.47012	2.30464	2.49034
Car11	ENSMUSG00000003273	2.93313	2.88218	2.82874	1.71086	1.69951	1.40041	1.08294	1.28912	0.730881	1.74202	1.45639	1.49049	1.58408	1.99922	1.56863	1.64536	1.57559	1.30449	1.42889	1.26119	1.48928	2.14348	2.04107	1.72883	1.32685	1.6077	1.34602	2.76277	2.47498	2.47445	1.51796	1.39105	1.25646	2.22685	1.8326	1.66638	2.56833	2.57186	2.6136	1.84631	2.05599	1.91037	3.67358	3.55525	3.95604	1.57668	1.7544	1.88123
Dlgap1	ENSMUSG00000003279	0.399875	0.340399	0.32909	0.359979	0.35086	0.379282	0.190568	0.113364	0.155454	0.457819	0.237022	0.263929	0.287096	0.269561	0.344935	0.24324	0.30003	0.227343	0.223279	0.272012	0.242472	1.07043	0.874286	0.821948	0.121091	0.143648	0.192424	0.683942	0.537484	0.605437	0.246801	0.195114	0.160377	0.483902	0.340179	0.384483	0.662443	0.535317	0.481419	0.283003	0.221787	0.166701	1.46441	1.42655	1.15998	0.139853	0.0773862	0.144065
Hck	ENSMUSG00000003283	0.307111	0.167991	0.28404	1.14886	1.12623	0.750162	0.58316	0.482337	0.368715	0.742788	0.696118	0.68594	0.3356	0.304899	0.517136	1.50022	1.07844	1.1714	0.188138	0.22408	0.153567	1.05952	1.01226	0.954022	0.188405	0.222958	0.280575	1.10932	0.908648	1.07616	0.241738	0.152322	0.272021	1.26683	0.967224	0.855458	0.616829	0.541598	0.575419	0.304765	0.275571	0.350394	2.82726	2.86571	2.9789	0.111055	0.153879	0.193835
Ap1m2	ENSMUSG00000003309	6.66529	6.62448	6.63527	0.4852	0.53145	0.591591	6.5125	6.32061	6.18735	0.0482965	0.117213	0	6.42396	6.43488	6.43595	0	0.504492	0.155523	6.62374	6.57497	6.68637	0.188812	0.111943	0.215763	6.38282	6.46283	6.41128	0.0630842	0.116198	0.234359	6.627	6.63167	6.64842	0.196669	0.105811	0.0680225	6.84713	6.79719	6.76936	6.24729	6.29234	6.28639	1.29632	1.77839	0.966828	6.20624	6.28737	6.29931
Mob3a	ENSMUSG00000003348	4.74593	4.66184	4.76298	5.02279	5.08857	5.04064	4.57081	4.41196	4.26921	4.89936	4.78031	4.83854	4.51021	4.57234	4.62964	4.93609	4.87071	4.82648	4.70361	4.60737	4.70287	5.43309	5.46439	5.36172	4.73029	4.71255	4.6641	5.31543	5.25552	5.31141	4.76416	4.72811	4.73033	5.48051	5.37154	5.44416	4.89975	4.84782	4.85475	4.62105	4.58139	4.56247	5.09899	5.20843	5.21408	4.54199	4.68855	4.66631
Cacnb3	ENSMUSG00000003352	6.37987	6.18513	6.23075	4.40942	4.38777	4.27252	6.95382	6.71565	6.47483	4.40686	4.15851	4.34541	6.94296	6.84476	6.92341	4.00025	3.85185	3.72614	6.62158	6.61541	6.72929	5.46249	5.47157	5.1861	6.5808	6.64795	6.56296	5.93901	5.79467	5.80088	6.7054	6.77149	6.74017	5.93734	5.72774	5.72728	6.34402	6.30751	6.2204	6.51957	6.52178	6.49946	5.86678	5.73544	5.94992	6.5317	6.49486	6.61097
Ccdc65	ENSMUSG00000003354	0.689686	0.608377	0.620454	0.450801	0.351848	0.4412	0.84437	0.438505	0.573484	0.581616	0.479838	0.459294	0.551245	0.637113	0.645493	0.313365	0.415554	0.363013	0.594405	0.52449	0.428072	0.727656	0.628779	0.554323	0.482371	0.374061	0.347236	0.388771	0.268867	0.484225	0.677302	0.698472	0.722386	0.564668	0.403779	0.42325	1.02857	1.06679	1.05829	0.892902	0.734436	0.746805	0.683224	0.766038	0.680156	0.633121	0.810772	0.743717
Fkbp11	ENSMUSG00000003355	3.42955	3.03209	3.17581	3.81675	4.18699	3.94598	3.31412	3.04108	2.99789	4.14205	4.10977	4.11418	2.88713	2.98237	3.01695	4.63376	4.13357	4.26621	2.71088	2.72033	2.75543	3.21553	3.34766	3.3457	2.87692	2.78709	3.19543	3.60128	3.46377	3.54192	3.17782	3.23311	3.25289	3.36912	3.15086	3.40113	2.95809	3.12093	2.72226	3.3136	3.27955	3.35535	3.25841	3.45971	3.47847	3.51378	3.42279	3.35808
Pld3	ENSMUSG00000003363	4.81995	4.76456	4.66816	4.33071	3.98789	4.05615	4.9785	4.617	4.3264	3.9993	3.94858	3.82037	4.83131	4.74372	4.96995	3.94021	3.88976	3.92096	5.2396	5.38396	5.29094	5.03721	5.174	4.89758	5.04782	5.04579	5.05148	4.89631	4.78747	4.67256	5.15295	5.13961	5.17437	5.0228	4.90678	4.98056	5.32905	5.26312	5.3303	5.53839	5.52042	5.66378	5.60035	5.65773	5.87164	5.2691	5.23435	5.41429
Grik5	ENSMUSG00000003378	5.00617	4.78727	4.80377	3.66011	3.52951	3.67352	4.54893	4.36738	4.21863	3.98828	3.95999	3.87621	4.46975	4.5322	4.67117	3.99767	3.79614	3.77684	4.13569	4.25567	4.31409	4.62258	4.55174	4.4619	4.222	4.38141	4.28619	4.79015	4.68258	4.6708	4.21227	4.4022	4.26695	4.63099	4.64347	4.53605	5.06734	5.10335	5.15794	3.9783	4.15759	3.97414	4.97881	4.88304	4.95393	4.2496	3.78251	4.18903
Rabac1	ENSMUSG00000003380	5.12236	4.82767	4.92868	4.39919	4.45224	4.34282	4.87198	4.68632	4.3915	4.55579	4.29208	4.3448	4.91735	4.78175	4.85639	4.52074	4.35794	4.17713	5.27571	5.18977	5.38004	5.31891	5.61872	5.27887	5.21775	5.45662	5.21296	5.3332	5.29429	5.22708	5.34337	5.31359	5.22585	5.44994	5.18172	5.42686	5.66937	5.68082	5.65008	4.95422	5.33249	5.14033	5.12313	5.66795	5.21725	5.25886	5.23477	5.40277
Etv3	ENSMUSG00000003382	4.05213	4.09294	4.05908	3.51966	3.09804	3.53376	4.35512	4.46036	4.38531	3.58024	3.5074	3.41907	4.26032	4.35875	4.38046	3.53532	3.53672	3.45233	5.03233	5.00164	5.09163	3.93851	3.91143	3.64698	4.89853	4.87421	4.82386	3.89358	3.73255	3.73022	4.82142	4.74203	4.7851	3.88808	3.88779	3.72684	4.16138	4.15294	4.08279	5.07659	4.99047	5.04667	3.74613	3.81823	3.62563	4.87517	4.98843	4.90305
Elavl3	ENSMUSG00000003410	4.45171	4.60872	4.65195	1.53165	1.60276	1.39074	0.0928838	0.0488615	0.0631771	0.0985629	0.0822235	0.105272	0.188798	0.186873	0.228372	0.725275	1.64322	0.264823	0.357445	0.44426	0.435678	0.556154	0.353884	0.545836	0.0202853	0.0659933	0.0468835	0.0934516	0.160643	0.196973	0.0726201	0.138425	0.116015	0.462535	0.297305	0.201587	5.84137	5.80261	5.67526	0.140861	0.170257	0.130891	1.30824	1.9214	1.18955	0.04968	0.0593388	0.053162
Rab3b	ENSMUSG00000003411	3.75187	3.58643	3.66833	3.62491	3.71289	3.50859	4.4069	4.17219	4.10915	3.28284	2.99853	2.99139	3.81158	3.79807	3.90766	2.78075	2.56348	2.46619	3.44262	3.60164	3.7428	3.75316	3.83719	3.63832	3.4099	3.56371	3.59954	3.56423	3.60054	3.62832	3.37265	3.32738	3.22532	3.66222	3.37676	3.45109	4.70383	4.68416	4.53711	3.26389	3.02724	2.93306	3.74656	3.69814	3.86658	2.62006	3.05476	3.27636
St8sia6	ENSMUSG00000003418	3.5416	3.83705	3.69911	1.1339	0.734381	0.939257	0.0431012	0.0765224	0.0550529	0.383621	0.360292	0.384746	0.186613	0.198576	0.0958452	1.6781	0.680912	0.902857	0.343154	0.327732	0.272348	0.3384	0.28046	0.316968	0.335427	0.183224	0.221849	0.293699	0.430339	0.210272	0.431176	0.266415	0.223541	0.369451	0.295772	0.232991	3.41512	3.38746	3.27662	0.969481	0.735085	0.858302	0.417718	0.392458	0.342793	0.807121	0.747266	0.704476
Fcgrt	ENSMUSG00000003420	0.258176	0.102958	0.167719	1.80292	2.09429	1.84606	0.195419	0.206464	0.226669	1.58719	1.65909	1.76734	0.170826	0.225259	0.264929	2.12182	1.8777	1.71538	0.145675	0.138745	0.157252	3.19712	3.36779	3.09421	0.270527	0.475892	0.463545	3.23768	3.08306	3.07445	0.215567	0.241887	0.177709	2.84009	2.56074	2.72254	0.697139	0.655208	0.49958	0.299076	0.502503	0.326634	4.02625	4.20691	4.24102	0.3542	0.23041	0.301385
Rps11	ENSMUSG00000003429	10.4595	10.6576	10.473	10.6887	11.0565	10.8065	10.6474	10.5916	10.5194	10.8846	11.0659	10.7587	10.3855	10.4504	10.4224	10.5007	10.7242	10.9325	10.9658	10.8209	10.9823	10.7944	10.9153	10.8274	11.0666	10.9522	11.0343	11.0293	10.9934	10.9642	11.0235	11.013	11.0619	11.0074	10.8347	10.9187	10.99	10.8976	10.8515	10.2756	10.335	10.4968	9.81235	9.86594	10.0141	10.4092	10.4758	10.4021
Dll3	ENSMUSG00000003436	2.30937	2.24476	2.19785	0.0889363	0.976798	0.666755	0.294513	0.211766	0.199517	0.124785	0.0896244	0.0484953	0.299723	0.122164	0.305352	0.370423	0.501503	0.100519	0.0680995	0.157987	0.286779	0.349779	0.21931	0.1277	0.0662514	0.169208	0.142743	0.277756	0.210634	0.250179	0.225839	0.0887097	0.0298016	0.261652	0.189599	0.297927	2.59307	2.84873	2.81435	0.0720936	0.443332	0.156604	0.673507	0.675277	0.569626	0.123342	0.278304	0.123415
Bicd1	ENSMUSG00000003452	2.98882	3.1498	2.89249	1.62306	0.476576	1.60044	2.29486	2.7108	2.25691	1.46891	1.65849	1.49198	2.59037	2.6079	2.49343	1.73627	1.37572	1.16214	1.57187	1.42515	1.35315	0.840927	0.848805	0.748367	1.72001	1.76002	1.54227	1.20822	1.33442	1.35815	1.49261	1.51414	1.72804	0.646988	0.85483	0.677092	2.95417	3.01156	2.8177	1.02474	0.990078	1.03919	0.878103	0.835719	0.557562	1.31406	1.12355	1.01366
Phyhip	ENSMUSG00000003469	3.23989	3.16779	3.12189	0.914044	0.897474	0.686958	2.05113	1.79072	1.84921	0.127714	0.276896	0.352339	1.8156	1.92639	1.86401	0.303965	0.260211	0.708455	1.27896	1.38364	1.56319	1.184	1.42119	1.29978	0.994691	1.11695	1.2443	0.564486	0.737663	0.703933	1.15043	1.15597	1.26845	0.584904	0.624399	0.571647	3.37008	3.44521	3.43915	1.40144	1.4006	1.41009	1.04569	1.25785	1.14882	1.27064	1.41494	1.4757
Inmt	ENSMUSG00000003477	0.207153	0.0874901	0.3614	4.20865	4.23678	4.29533	0	0	0	0.122881	0.237463	0.107067	0.164396	0.146275	0.0430306	2.39374	2.07543	2.20198	0	0	0	1.92341	2.05359	2.27313	0	0	0	0.510953	0.302542	0.383289	0	0	0	0.42055	0.191896	0.505308	0.270226	0.280203	0.0674406	0.0426345	0	0	1.84989	2.66831	1.51183	0	0	0
Impdh1	ENSMUSG00000003500	4.91613	4.69851	4.7347	5.2104	5.40752	5.12886	5.01815	4.66418	4.56521	5.23955	5.18605	5.15839	4.63721	4.64068	4.71523	4.99068	4.96898	5.05603	4.53876	4.39817	4.44793	4.60338	4.76338	4.61442	4.51765	4.52807	4.40043	4.68498	4.76697	4.81242	4.39039	4.54515	4.4579	4.63281	4.48087	4.55953	4.76378	4.7446	4.72059	4.16302	4.31065	4.22426	4.74198	4.70809	4.82337	4.36368	4.25103	4.4412
Dusp3	ENSMUSG00000003518	2.56999	2.72135	2.69626	3.34022	2.97914	3.3107	2.1673	2.04023	1.86761	2.91778	2.73235	2.82184	2.28948	2.27568	2.43226	3.43523	2.78141	3.04189	1.47293	1.5753	1.63639	3.38837	3.28595	3.14811	1.37403	1.15546	1.35226	3.29075	3.16247	3.18584	1.19786	1.12541	1.45715	3.08745	2.93541	2.79242	2.57538	2.5247	2.37183	1.49854	1.67213	1.71246	3.3742	3.40808	3.19091	1.25562	1.53628	1.16194
Prodh	ENSMUSG00000003526	3.36699	3.51259	3.34336	3.74174	3.72681	3.58826	3.38768	3.28513	3.18417	3.56262	3.33572	3.51047	3.06918	3.09066	3.1458	3.4706	3.58117	3.51281	3.28207	3.12827	3.18349	3.11368	3.30028	3.18494	3.25641	3.19767	3.09495	3.13797	3.1259	3.38968	3.17036	3.15528	3.24319	2.86309	2.88959	3.0558	3.24615	3.23248	3.26806	2.79799	2.94864	3.12241	2.76334	2.75033	2.81314	3.30103	3.04091	3.10928
Ddr1	ENSMUSG00000003534	6.40114	6.15889	6.3453	1.77071	1.17951	1.49456	7.0167	6.73182	6.44866	2.30503	2.4734	2.44444	6.68025	6.57205	6.81656	1.55446	1.83726	1.30495	7.52078	7.34853	7.48539	3.53487	3.37478	3.01021	7.35774	7.23128	7.20495	4.38612	4.09092	3.80429	7.42197	7.37187	7.31201	3.43132	2.94168	2.88231	6.87963	6.84644	6.7793	7.30576	7.37062	7.42595	4.50663	4.61244	4.58946	7.10028	7.27685	7.35767
Ier3	ENSMUSG00000003541	0.964603	1.24327	1.29011	2.29519	1.8995	1.82768	1.23989	1.17494	1.26837	1.0089	1.12729	1.17055	1.06667	1.30529	1.3544	1.47206	1.34209	1.17365	2.75797	2.29376	2.57068	2.51551	2.66252	2.26149	2.07895	1.91266	1.6785	1.64529	1.29344	1.52328	2.37531	2.12238	1.74605	1.99061	1.88033	1.75443	1.44598	1.28988	1.19848	3.88387	3.5899	4.13063	2.69595	2.77413	2.89815	3.33496	3.1921	3.2175
Fosb	ENSMUSG00000003545	2.329	1.54025	1.52345	0.678331	0.17643	0.131508	1.51597	0.977724	0.732527	0.0523281	0.0912743	0.0184174	2.96272	2.11717	1.58509	1.04759	0.351936	0.267387	5.38219	6.08828	5.76278	2.0892	2.19089	1.8006	4.09611	4.74338	4.42131	1.52388	1.38643	1.72738	4.13743	4.83489	3.8399	2.54898	1.69349	1.86643	0.975603	1.0643	1.44826	5.21846	4.88526	4.22496	1.82686	2.97666	2.3626	5.04257	4.65232	4.42867
Klc4	ENSMUSG00000003546	4.53042	4.44057	4.42202	3.72344	3.80926	3.69811	4.06006	3.74868	3.62415	3.99009	3.96191	3.9058	4.12744	4.20683	4.18726	4.02002	3.81127	3.89324	3.74877	3.68068	3.78557	4.21241	4.3249	4.22152	3.92912	4.00128	4.06387	4.21947	4.27773	4.28287	3.83359	4.00873	4.02361	4.43355	4.37126	4.42974	4.7303	4.74552	4.59131	3.30837	3.37292	3.34189	4.02034	4.15047	4.06703	3.5735	3.49686	3.51434
As3mt	ENSMUSG00000003559	4.09127	4.02665	4.05128	4.43395	4.91542	4.41068	4.16966	4.07567	4.03765	4.4399	4.47072	4.53546	3.92503	3.96345	3.89866	4.43364	4.41781	4.51943	3.53575	3.5155	3.69534	4.70414	4.82352	4.57105	3.38116	3.49188	3.52306	4.13805	3.86064	4.13967	3.23243	3.23971	3.43663	4.55044	4.35159	4.50383	3.81035	3.90403	3.92889	3.07475	3.01808	3.27169	4.64379	4.59692	4.82045	2.75119	2.98685	3.09247
Homer3	ENSMUSG00000003573	6.59198	6.49565	6.50575	7.00894	6.78074	7.01594	6.70893	6.57681	6.4048	6.89403	7.04175	6.90977	6.66034	6.75399	6.71591	7.23883	7.04939	6.99267	6.25005	6.1392	6.45148	6.71075	6.93449	6.65863	6.25017	6.28943	6.2911	6.44079	6.42543	6.61329	6.29652	6.41171	6.49821	6.61181	6.53801	6.65119	6.14224	6.14469	6.1502	5.76837	5.74909	5.71516	6.11843	6.22887	6.09084	5.75085	5.69147	5.72058
Rnf215	ENSMUSG00000003581	4.09383	3.92999	3.93402	3.79313	4.00618	3.75991	4.14183	4.01675	3.78977	3.94579	4.09679	3.89608	4.09973	4.21307	4.12706	3.8417	3.83726	3.97779	4.3889	4.4993	4.61087	4.69629	4.75821	4.45404	4.55326	4.70502	4.61057	4.58734	4.3971	4.48875	4.58529	4.67582	4.64391	4.58797	4.65859	4.6066	4.45765	4.32889	4.52207	4.65184	4.81993	4.85578	5.18193	5.16952	5.2057	5.09913	4.74949	5.02315
Sec14l2	ENSMUSG00000003585	2.6616	2.8336	2.8101	2.18766	2.26511	2.10407	1.48019	1.53797	1.73164	1.88655	2.0981	1.97363	1.77469	1.91141	1.87216	2.01809	2.11543	2.20132	1.28221	1.1959	1.34141	2.02042	2.06917	1.78903	1.46333	1.50806	1.33369	1.73447	1.708	1.67305	1.1496	1.29937	1.47856	1.95603	2.03272	1.99602	3.20789	2.98163	3.02702	1.3287	1.47529	1.26425	2.2889	2.34767	2.30645	1.38127	1.40182	1.29861
Aven	ENSMUSG00000003604	4.78129	4.64005	4.76683	5.25341	5.4947	5.24463	4.82185	4.80501	4.85617	5.32935	5.31278	5.08616	4.82677	4.75812	4.57894	5.42004	5.19113	5.42445	4.5474	4.48712	4.63959	4.73745	4.81142	4.55017	4.61413	4.56687	4.64488	4.70122	4.79788	4.66073	4.58737	4.63716	4.71462	4.55461	4.75184	4.67769	4.5836	4.70524	4.51333	4.46798	4.42583	4.45206	4.27282	4.39146	4.57862	4.50434	4.56778	4.38047
Cp	ENSMUSG00000003617	0.0135575	0.132302	0.0104874	0.311205	0.50365	0.308388	0.197375	0.109465	0.135866	0.104184	0.44587	0.200082	0.234872	0.0472285	0.227649	0.0567098	0.229717	0.256144	0	0.0099694	0.0602148	0.148178	0.0735759	0.0231808	0	0.00990151	0.189856	0.208979	0.200374	0.126969	0.128876	0.118341	0.0774983	0.384885	0.165567	0.20186	0.0681141	0.0510116	0.149634	0	0.00886292	0.0984942	0.40081	0.274587	0.408221	0	0.00881624	0
Calb2	ENSMUSG00000003657	0.262686	0.026374	0.248075	1.86744	1.73417	2.00955	0.0368112	0	0	0.145384	0.199114	0.330651	0	0.0805742	0.0256466	0.722729	0.534036	0.469532	0.0798229	0.0593731	0	2.82902	3.14469	3.34827	0.0774497	0	0	0.0526463	0.170206	0.0768298	0.0239795	0	0.0578886	0.381539	0.682939	0.8817	2.31771	2.21816	2.25722	0	0	0	0.725435	0.663331	0.790025	0.0274645	0	0
Man1a	ENSMUSG00000003746	1.70849	1.59511	1.61579	1.52163	1.42553	1.55396	1.65165	1.97707	2.0526	1.74273	1.70138	1.72438	2.30215	2.27272	2.29292	1.49187	1.559	1.67786	3.23613	3.28724	3.51119	2.32501	2.15339	1.90737	2.76654	2.8627	2.88829	1.82352	1.64759	1.55319	3.19979	3.24263	3.23786	1.96577	1.84504	1.68839	2.41815	2.41821	2.29915	3.18029	3.01051	3.14875	2.53115	2.61322	2.46005	2.68507	2.91046	2.89895
Itpkc	ENSMUSG00000003752	3.93793	3.77818	3.7136	3.19151	3.07078	3.23365	4.37327	4.23427	4.04585	3.31676	3.26227	3.16471	4.34424	4.40771	4.38526	3.6302	3.29486	3.1775	4.73112	4.7279	4.88839	3.70768	3.73837	3.52179	4.64119	4.65619	4.64816	3.80022	3.55781	3.61985	4.52606	4.5564	4.5478	3.7331	3.64973	3.54456	4.05513	4.04031	4.04746	4.54224	4.4295	4.47218	3.38869	3.59472	3.48061	4.38951	4.37661	4.28885
Kif20a	ENSMUSG00000003779	6.74143	6.92086	6.80849	7.22281	6.99725	7.16747	6.97577	6.99815	6.94553	7.23925	7.26624	7.17336	6.7905	6.84229	6.72468	7.12538	7.23958	7.23411	6.5027	6.53698	6.56839	6.84656	6.9232	6.75264	6.51151	6.52511	6.41865	6.87253	6.7529	6.88084	6.54066	6.55998	6.57801	7.02027	7.06823	6.98743	6.5693	6.52527	6.36781	6.15319	6.21757	6.24009	6.36747	6.38882	6.45699	6.27613	6.49311	6.42406
Dnase2a	ENSMUSG00000003812	3.7198	3.78061	3.89488	2.68991	2.67857	2.73812	4.09453	3.81345	3.93302	2.21571	2.40733	2.33663	4.00995	4.003	3.92192	2.87305	2.62062	2.44991	4.59679	4.62376	4.63331	3.70991	3.45355	3.24867	4.58135	4.5107	4.47226	3.50111	3.17938	3.26153	4.52793	4.51123	4.47381	3.72004	3.50456	3.55264	4.54263	4.38437	4.35591	4.81503	4.76208	4.79587	3.82346	3.95905	3.87108	4.54492	4.66393	4.72169
Calr	ENSMUSG00000003814	9.90646	9.77676	9.63358	9.8105	9.98739	9.75316	9.75776	9.65819	9.66135	9.76182	9.97721	9.77367	9.57761	9.63879	9.49213	9.96913	9.765	9.91884	9.41961	9.54373	9.37753	9.70924	9.74357	9.44669	9.09282	9.12361	8.95802	9.53149	9.52989	9.32199	9.28635	9.42238	9.28263	9.60695	9.68687	9.55435	9.42901	9.52566	9.22289	9.40945	9.4251	9.52165	9.84743	9.80343	9.97301	9.3488	9.43851	9.30669
Syce2	ENSMUSG00000003824	6.03409	6.12928	6.2318	6.07466	6.65127	6.15438	5.79194	5.82637	5.8091	6.27304	6.02688	6.05958	5.9435	5.82482	5.89921	6.20793	6.02183	6.18915	5.48619	5.37771	5.57639	6.02807	6.17373	5.93941	5.71589	5.54727	5.48899	6.29112	6.09896	6.34847	5.80938	5.66205	5.83531	6.14185	6.01332	6.25258	5.8296	5.8822	5.8184	5.8524	5.88082	5.69111	5.98836	6.09484	6.16799	5.84953	5.93779	6.03028
Nfat5	ENSMUSG00000003847	4.2015	4.1238	3.91972	3.35879	2.58287	3.88957	4.27108	4.26224	4.50002	3.44407	3.874	3.5373	4.43103	4.84588	4.62246	3.28424	3.90098	4.13463	4.80446	4.86267	4.59905	4.1846	3.89084	3.68659	4.43243	4.49657	4.3747	3.82804	3.5157	3.56459	4.49593	4.40042	4.36721	3.75871	4.10837	3.62035	4.23131	4.15721	3.99786	5.00655	4.58696	4.58554	4.84733	4.51324	4.42387	4.36913	4.1707	4.44059
Nqo1	ENSMUSG00000003849	1.66097	1.50101	1.62374	2.9842	3.34441	3.12569	1.72473	1.11829	1.47114	3.22257	2.99073	3.25395	1.53612	1.51863	1.15381	2.80188	3.03193	3.09236	1.73472	1.52243	1.68035	3.80994	3.85871	3.76376	1.43629	1.31033	1.58295	3.70882	3.50684	3.78697	1.63437	1.52879	1.67664	3.68505	3.53697	3.7204	1.97155	2.06521	1.93823	1.58026	1.60225	1.63576	3.59073	3.63344	3.74015	1.80222	2.03258	1.47874
Ppfia3	ENSMUSG00000003863	4.16333	4.106	4.10221	1.97981	2.17587	1.6814	3.47384	3.16646	2.94675	1.97824	1.60584	2.06083	3.48734	3.2957	3.42196	2.10534	2.06013	1.26863	4.13053	4.1033	4.20208	2.82053	3.03037	2.82066	3.9058	3.9392	3.85739	2.56624	2.4188	2.58577	3.99501	3.85193	3.80294	3.10748	2.86408	2.89404	4.6374	4.61598	4.78656	4.16541	4.15089	4.2444	3.17043	3.10547	3.21631	4.19574	4.12035	4.31931
Ruvbl2	ENSMUSG00000003868	7.05492	7.04531	6.97016	7.14327	7.17047	7.07747	7.17856	6.98494	6.77278	7.16144	7.24279	7.07458	6.76388	6.84841	6.7981	7.41293	7.14071	7.13088	6.75521	6.62562	6.81433	6.64908	6.73536	6.68719	6.71994	6.72506	6.70728	6.78802	6.77793	6.7728	6.78262	6.80383	6.81031	6.80818	6.70077	6.79896	7.05901	6.97873	6.95542	6.31974	6.45319	6.54407	5.99337	6.19239	6.13933	6.41953	6.40419	6.5579
Lin7b	ENSMUSG00000003872	0.692923	0.659409	0.793175	0.311197	0	0.131017	0.709112	0.300699	0.329474	0.449285	0	0.222275	0.565521	0.613884	0.563268	0.787461	0.746132	0.128101	0.519598	1.21194	0.829723	0.855094	0.568452	0.675667	0.604934	1.15311	0.718895	0.7086	0.827799	0.608105	0.529153	0.852692	0.806159	0.637049	0.553292	0.652553	1.21141	1.01499	1.13894	0.812469	1.07828	0.915364	1.24543	0.845826	0.536719	1.23974	1.19267	0.880842
Tfam	ENSMUSG00000003923	6.67549	6.81196	6.77683	6.82928	6.91841	6.9681	6.59439	6.85552	7.11492	6.91461	7.12979	6.89208	6.7036	6.67975	6.67238	6.70504	6.95303	6.91458	6.57067	6.50978	6.52013	6.53522	6.57201	6.49973	6.76665	6.54513	6.83537	6.67064	6.62216	6.65043	6.67032	6.6559	6.86316	6.62072	6.59018	6.59421	6.74214	6.73162	6.7453	6.19694	6.11626	6.13707	5.92184	5.91736	5.70455	6.30876	6.3658	6.06919
Efnb3	ENSMUSG00000003934	5.09071	5.11949	5.18284	5.58003	5.3696	5.53352	4.23301	4.37787	4.18025	5.52849	5.51827	5.47226	4.57763	4.42857	4.68712	5.07002	5.13477	5.20177	4.38616	4.32	4.39728	6.38775	6.39342	6.12633	4.42046	4.41339	4.37129	6.26732	6.18132	6.13228	4.58579	4.53644	4.62621	6.15348	6.02637	6.05712	5.30665	5.32111	5.30937	4.23287	4.33281	4.28363	6.54989	6.537	6.60161	4.08765	4.12563	4.17878
Mmd	ENSMUSG00000003948	4.96268	5.08052	5.11512	6.38676	6.51336	6.41906	5.19805	5.30984	5.48476	6.1981	6.12671	6.18231	5.09757	5.08565	5.20116	6.03495	6.17135	6.21023	4.78178	4.79341	4.89671	6.37939	6.38182	6.20499	4.87582	5.0019	5.02287	6.0806	5.95734	6.0299	5.0135	5.02708	5.04338	6.19057	6.16359	6.18707	5.22108	5.23648	5.14412	4.68802	4.72168	4.64009	6.11002	6.18908	6.19731	4.59677	4.7219	4.76685
Hlf	ENSMUSG00000003949	0.591873	0.724043	0.846315	0.46766	0.387115	0.228922	0.510327	0.400757	0.498482	0.351648	0.239812	0.552016	0.734622	1.01581	1.01413	0.363765	0.239597	0.245838	1.66839	1.70154	1.53672	0.551491	0.506425	0.519048	1.25232	1.32615	1.3627	0.59141	0.439628	0.333057	1.47728	1.29846	1.38478	0.633421	0.631062	0.658275	1.12443	0.904076	0.73681	2.0042	1.77942	2.13916	1.91471	1.78375	1.74519	1.51776	1.55783	1.64375
Fam162a	ENSMUSG00000003955	7.35294	7.3625	7.47347	7.49996	7.98166	7.53255	7.80122	7.73543	7.86936	7.58024	7.40535	7.47001	7.82988	7.75126	7.63173	7.66872	7.41867	7.4519	7.69119	7.5946	7.62021	6.98901	7.20445	6.99006	7.92555	7.87702	7.93185	7.11855	7.12674	7.22644	7.95634	7.9321	8.05573	7.12466	7.02638	7.16158	7.49573	7.45305	7.50968	8.04031	8.08853	7.95476	6.76886	6.81075	6.91639	8.52346	8.45481	8.39682
Ssbp2	ENSMUSG00000003992	5.89439	6.0679	5.99496	5.5891	5.44347	5.44702	5.68536	5.79936	5.58126	5.97294	5.94943	5.80002	6.12888	6.18911	6.18102	5.73362	5.99782	6.07189	6.52352	6.33961	6.28769	6.43982	6.53779	6.21691	6.44858	6.45718	6.14616	6.51131	6.34597	6.306	6.58037	6.63231	6.48564	6.51581	6.35413	6.31269	6.67686	6.52933	6.386	6.76488	6.82231	6.80717	6.37935	6.57971	6.40599	6.65907	6.8393	6.9079
Fancl	ENSMUSG00000004018	4.43247	4.57472	4.5331	4.31275	4.59673	4.49677	4.67652	4.60996	4.79906	4.67299	4.59315	4.547	4.57063	4.69862	4.46472	4.27654	4.34393	4.84031	4.7191	4.69401	4.77597	4.65535	4.64023	4.48614	4.80082	4.76553	4.62456	4.75475	4.75324	4.86314	4.89163	4.69757	4.88669	4.77283	4.60287	4.54972	4.8927	4.84324	4.73774	4.1234	3.8202	3.91967	3.84308	3.79407	3.64298	4.194	4.25871	4.04742
Brinp2	ENSMUSG00000004031	2.40631	2.35461	2.36199	0.125228	0.107988	0.0558169	0.255873	0.404062	0.284121	0.475803	0.544281	0.433944	0.205957	0.113978	0.225316	0.036477	0.196892	0.271938	0.268792	0.307807	0.181933	0.712023	0.696113	0.595634	0.457438	0.464237	0.500989	0.143549	0.163338	0.111426	0.183998	0.231537	0.143621	0.0358874	0.0667598	0.0621319	2.84369	2.75541	2.71615	0.260886	0.161414	0.197712	1.38169	1.44291	1.32762	0.335081	0.247386	0.159989
Gstm5	ENSMUSG00000004032	7.174	7.17277	7.2282	7.56112	8.08315	7.62686	7.27101	7.20235	7.21743	7.65818	7.43286	7.5691	7.15642	7.12811	7.07821	7.51037	7.56166	7.75396	7.26333	7.23224	7.32411	7.42434	7.58747	7.38658	6.97668	6.97706	7.0735	7.40351	7.31374	7.35884	7.08384	7.05823	7.10421	7.43207	7.31986	7.47815	7.75656	7.75477	7.55587	6.81989	6.59689	6.67534	7.29824	7.26709	7.3621	6.5597	6.46702	6.4645
Gstm7	ENSMUSG00000004035	4.30903	4.36508	4.47072	4.18692	4.30302	4.07484	3.37462	3.33905	3.17228	4.269	4.13236	4.06016	3.51032	3.66773	3.84066	3.78806	4.11502	4.1714	4.50814	4.2562	4.39658	5.37635	5.36401	5.23135	4.14901	4.07453	4.33975	5.14769	5.03079	5.08373	4.44575	4.40958	4.38144	5.08339	5.02873	4.99846	5.35849	5.20105	5.22862	4.45023	4.35016	4.391	5.38439	5.26085	5.4675	4.29441	4.36806	4.3841
Gstm3	ENSMUSG00000004038	0.372052	0.339303	0.154516	0.242472	0.153918	0.406342	0.19265	0.17315	0.27858	0.409646	0.330968	0.217532	0.276323	0.350587	0.461028	0.474073	0.28429	0.343589	0.324017	0.301448	0.398528	0.447185	0.594848	0.438863	0.49223	0.68505	0.607521	0.558314	0.501306	0.568885	0.332856	0.297966	0.605027	0.367582	0.54611	0.615553	0.939611	0.842097	0.718633	0.186838	0.306748	0.150911	0.382591	0.368562	0.380501	0.226137	0.48162	0.21357
Stat3	ENSMUSG00000004040	3.31133	3.39319	2.95971	3.81698	3.87418	3.96025	2.57202	2.71017	2.26331	4.28253	4.03023	3.83287	2.55825	2.37754	2.78519	4.10949	3.54125	3.79858	2.95963	3.10167	3.10475	3.93075	4.05166	3.9046	3.11246	3.14639	3.06088	3.89541	3.93072	3.69175	3.18863	2.99074	2.90925	3.51425	3.71901	3.53133	3.76668	3.69839	3.5654	3.68732	3.72129	3.60585	4.71837	4.57849	4.66751	3.82763	3.69738	3.89796
Stat5a	ENSMUSG00000004043	0.309312	0.300945	0.324867	1.50787	1.30116	1.27862	0.396909	0.294887	0.295788	0.813096	0.998759	0.828337	0.31448	0.327885	0.285869	1.28793	1.05082	1.25594	0.37665	0.38163	0.327847	2.19042	2.05777	1.83894	0.436063	0.478695	0.345602	1.42037	1.25061	1.14819	0.533633	0.384554	0.447163	1.24371	1.27353	1.13413	0.375014	0.503311	0.268955	0.742159	0.787568	0.771363	2.40561	2.69937	2.54913	0.790111	0.803839	0.812072
Ptrf	ENSMUSG00000004044	1.3089	1.14407	1.18425	3.8293	3.57466	3.7854	2.64364	2.50969	2.54273	3.39439	3.27252	3.31806	1.72042	1.54397	1.58225	3.33076	3.29225	3.29437	3.7878	3.70271	3.70095	4.34798	4.29724	4.00539	4.27645	4.22986	4.11198	4.20898	3.96981	4.04872	3.5471	3.44403	3.12276	3.95246	3.87256	3.6758	1.82805	1.89799	1.39894	4.81214	5.11879	4.89946	5.9997	6.25975	6.09166	5.16948	5.31316	5.30259
Map3k11	ENSMUSG00000004054	5.23294	5.06133	5.11114	4.87249	4.52477	4.75369	5.19744	4.91934	4.62897	4.82714	4.72108	4.70393	4.88542	4.87463	5.05938	4.99116	4.66882	4.64091	4.85627	4.76944	4.93196	4.29128	4.3748	4.19602	4.92582	4.86961	4.71309	4.37306	4.26017	4.35611	4.86562	4.88964	4.89649	4.36976	4.265	4.22627	5.1271	5.08263	4.98697	4.79484	4.82192	4.69598	3.99335	4.02537	4.00169	4.61923	4.72842	4.73834
Zak	ENSMUSG00000004085	2.32618	2.36322	2.375	2.59505	2.34535	2.62526	2.51475	2.53938	2.71138	2.81358	2.71016	2.64861	2.55704	2.45594	2.40551	3.10532	2.60649	2.49383	3.01792	2.97188	2.7637	2.96641	2.93324	2.64415	3.94682	3.68653	3.42998	2.87904	2.7187	2.63437	3.20499	3.06543	3.05063	2.59988	2.77485	2.51642	3.18128	3.13941	3.01191	3.32702	3.66773	3.47035	3.23857	3.1094	3.14687	4.16737	4.29614	4.13045
Angptl2	ENSMUSG00000004105	4.49608	4.48262	4.38272	4.90496	4.59008	4.89314	4.94012	4.82021	4.61395	5.11697	5.05852	4.92674	4.91209	4.79396	4.98214	5.06115	4.95343	4.99203	4.88742	4.87741	5.06624	5.3838	5.3418	5.07444	4.9458	4.94115	4.9085	5.39728	5.23421	5.3315	4.869	4.74044	4.79633	5.37977	5.39369	5.29309	4.50932	4.45685	4.35821	4.63355	4.63516	4.65576	5.62554	5.54542	5.65118	4.59981	4.74325	4.69546
Cacna1b	ENSMUSG00000004113	3.86985	3.81308	4.00513	1.52097	0.929442	0.985517	3.93612	3.83188	3.62197	0.383136	0.290034	0.0912744	3.82609	3.66839	3.77372	0.626211	0.381086	0.274903	4.06437	4.27985	4.26229	0.814333	0.915845	0.777638	4.04738	3.8492	3.82928	0.484169	0.181218	0.233059	3.95911	3.96163	3.86364	0.910507	0.930547	0.783604	3.77318	3.74513	3.83013	4.03444	4.02105	3.8153	1.19277	1.27571	1.29108	3.8618	4.04711	4.16897
Trmt10a	ENSMUSG00000004127	4.15784	4.53386	4.37067	4.56706	4.28059	4.76108	4.26921	4.61915	4.49313	4.45923	4.6467	4.73476	4.43349	4.62904	4.53177	4.72124	4.5376	4.77338	4.30718	4.18429	4.18515	3.80269	3.80655	3.86279	4.09293	4.06333	3.99282	3.83198	3.85636	3.78511	4.1968	4.23117	4.30447	3.70963	3.74135	3.72769	4.11348	4.16907	3.95135	4.17659	3.81494	3.95442	3.81389	3.84322	3.41824	4.03566	3.92342	3.79885
Etv1	ENSMUSG00000004151	3.31906	3.42673	3.35498	3.99696	3.37754	3.835	2.21386	2.29702	2.32557	3.40099	3.43367	3.39302	3.64696	3.44758	3.93068	3.94743	3.91766	4.1428	1.70671	1.36889	1.55881	3.87422	3.79909	3.76985	2.11547	2.23409	2.08987	3.02969	2.99003	3.09404	2.79709	2.9384	3.0012	3.26348	3.37851	3.29961	2.85909	2.89908	2.7388	1.56443	1.63713	1.5902	3.27461	3.1999	3.13972	1.41632	1.11731	1.34955
Kifc2	ENSMUSG00000004187	1.72098	1.66583	1.7223	1.09553	0.97206	0.686876	1.52036	1.50128	1.32845	0.864583	0.799103	0.941408	1.67807	1.82979	2.07423	0.587621	0.861735	0.67541	1.69624	1.7219	1.89152	1.75338	1.4646	1.34133	1.70224	1.78083	1.81304	1.77866	1.59638	1.57488	1.92768	1.89255	1.95691	1.94923	1.7043	1.7114	2.18548	2.23224	2.14691	2.46804	2.47908	2.50886	2.792	2.62979	2.97667	2.53294	2.36612	2.62899
Psap	ENSMUSG00000004207	7.3255	7.24531	7.29708	6.77375	6.71049	6.70762	7.65045	7.53197	7.34758	6.76767	6.75466	6.68464	7.48776	7.49354	7.55411	6.76945	6.64573	6.61444	7.99339	7.92862	8.07709	7.23074	7.22659	6.88444	7.87027	7.85738	7.80007	7.25024	6.96913	6.98371	7.8202	7.80999	7.74995	7.12918	7.08136	6.9712	7.71343	7.68938	7.63076	7.8053	7.87133	7.98436	7.51558	7.61546	7.63155	7.74054	7.89063	7.92475
Wars2	ENSMUSG00000004233	2.69783	2.82774	2.88146	3.31755	2.9537	3.26278	3.49167	3.80268	3.6444	2.94208	2.89502	3.12461	3.29568	3.41	3.41053	3.18192	3.06745	2.9324	3.04462	3.07696	3.13643	3.17352	3.1453	3.07898	3.19964	3.23335	3.17831	3.21571	3.09912	3.15124	3.06202	3.06794	3.02768	3.39645	3.33369	3.2094	2.77555	2.66354	2.6243	2.89644	2.87635	2.88867	2.97701	3.03724	2.77448	3.09482	3.13072	3.01698
Ptpn6	ENSMUSG00000004266	3.48076	3.31721	3.29513	2.33465	2.60292	2.31128	2.90224	2.54127	2.96203	2.77665	2.68209	2.78953	3.07371	3.11309	2.9663	3.31114	3.01992	3.34777	2.93815	2.99582	2.77147	1.95742	1.92939	1.63969	3.04685	2.95626	2.91498	2.05582	2.20273	2.12702	2.93658	2.96351	3.25116	2.27819	2.0102	2.12765	3.8535	3.92335	3.64434	3.36473	3.4203	3.65923	1.93357	2.11064	1.75335	2.98833	3.58622	3.40086
Eno2	ENSMUSG00000004267	1.55304	1.36689	1.32584	0.837632	0.346388	0.263726	0.427371	0.10089	0.059293	0.636993	0.465763	0.615106	0.464826	0.670711	0.370351	1.1241	1.01338	0.94284	0.387968	0.471383	0.462814	1.84234	1.9136	1.509	0.467258	0.254948	0.671444	1.5332	1.55422	1.69043	0.368948	0.386756	0.31666	2.39189	1.81609	1.7417	2.40994	2.44994	2.45166	0.628822	0.859754	0.750159	2.78069	2.7452	2.97625	0.670306	0.455593	0.866489
Lpcat3	ENSMUSG00000004270	5.68327	5.69138	5.62795	4.69395	4.24601	4.54714	5.68117	5.51715	5.40933	4.69942	4.66514	4.76094	5.6716	5.45427	5.59206	4.46976	4.62472	4.58433	4.83709	4.86519	4.97054	4.92811	4.79036	4.51263	4.86849	4.82453	4.80013	4.56273	4.44555	4.52718	5.00911	4.95284	4.93337	4.49237	4.44702	4.44595	5.40201	5.33188	5.44664	5.21899	5.04771	5.18032	5.18605	5.08102	5.11751	5.17473	5.21643	5.12644
Clcn5	ENSMUSG00000004317	5.35938	5.34489	5.25732	4.36401	3.74676	4.41588	4.81164	4.85885	4.91829	5.0417	5.23874	5.03016	4.60779	4.79578	4.76536	4.86649	4.70981	4.65421	4.62802	4.76263	4.55407	4.65366	4.37993	4.327	3.99246	4.15532	4.10247	5.27427	5.07172	4.84989	4.23635	4.3748	4.43665	4.44983	4.84956	4.47779	4.8167	4.99116	4.87068	3.94809	3.8141	3.87587	4.35511	4.225	3.96999	3.38919	3.39886	3.40501
Clcn3	ENSMUSG00000004319	4.3871	4.46741	4.40942	3.27012	2.88527	3.36517	4.26912	4.33369	4.37967	3.09859	3.31495	3.18177	4.29965	4.42551	4.36929	3.28366	3.22874	3.11492	4.42276	4.45199	4.33525	2.99662	2.87175	2.75459	4.29317	4.29875	4.22607	2.7997	2.76063	2.76998	4.24313	4.24596	4.22178	3.03163	3.04134	2.82254	4.61285	4.5871	4.5681	4.22284	4.30627	4.24121	2.76029	2.68669	2.74595	4.24463	4.21135	4.27906
Hif3a	ENSMUSG00000004328	3.05977	2.97701	2.92089	2.50891	2.16802	2.61185	2.66943	2.58643	2.44683	2.41258	2.44211	2.28656	2.83113	2.88272	2.96082	2.30778	2.43548	2.48045	2.94502	3.03144	2.80044	3.63789	3.39566	3.28427	3.0306	2.91075	2.85297	3.21303	2.94984	2.98718	3.05118	2.97651	2.86257	3.39478	3.57031	3.25911	4.77933	4.73277	4.59024	3.28386	3.62384	3.50247	4.3641	4.17782	4.4071	3.6386	3.77399	3.82548
Gpx6	ENSMUSG00000004341	0.949043	0.65765	1.09209	0.0692636	0	0	2.32244	1.97866	2.19043	0	0.0366244	0.03189	2.30135	2.25725	2.07171	0	0.0605856	0.196753	1.11514	0.894223	1.18095	0	0.0995065	0.0928694	1.46462	1.56736	1.7671	0.0322869	0.0336048	0.0924441	1.936	2.2359	2.14602	0.0344128	0.0322431	0.0339853	0.81481	0.780057	1.04137	1.25737	1.23336	1.51858	0.141505	0	0	1.11513	1.06694	1.25376
Pde1c	ENSMUSG00000004347	1.62443	1.7251	1.61439	1.68595	1.24595	1.71911	1.14409	1.00664	1.25019	0.711409	0.566763	0.559459	1.34634	1.35048	1.48813	0.543719	0.83102	0.591162	1.23833	1.14812	1.11505	2.1603	1.94017	1.8123	0.976357	0.88262	0.824268	0.780801	0.765172	0.758724	1.13264	1.23748	1.14059	0.85141	0.849911	0.880776	2.12393	2.03288	2.05667	1.00657	1.05059	1.02742	1.73001	1.72189	1.59683	0.74948	0.815165	0.77462
9330159F19Rik	ENSMUSG00000004360	1.45931	1.49595	1.453	0.426461	0.340827	0.438055	0.369576	0.35227	0.332667	0.565045	0.557752	0.604488	0.464862	0.231121	0.296958	0.326484	0.491244	0.38314	0.477615	0.568728	0.445561	0.748113	0.664217	0.4861	0.344612	0.46253	0.399367	0.659587	0.626366	0.693224	0.367638	0.324137	0.408441	0.842744	0.850303	0.8827	2.15438	2.15053	2.00546	0.304643	0.363679	0.445379	0.917048	0.85632	1.02674	0.281779	0.260224	0.318901
Sst	ENSMUSG00000004366	2.67629	2.67023	2.60627	0	0.0825	0	0	0.0818358	0.298184	0.0897604	0.343136	0.352288	1.15312	1.27907	1.59531	2.53211	4.22839	1.66692	0.158166	0.0891895	0.0873497	1.40184	0.978469	0.931051	0	0.320203	0	1.26034	1.33089	1.32677	0.97237	1.05411	0.523716	1.50179	0.226808	0.0839498	0.0778578	0.14079	0.140264	0.991407	1.27318	0.947831	5.55774	5.50026	5.60564	0.223619	0	0.508959
Large	ENSMUSG00000004383	3.90486	4.04048	3.81111	4.13216	3.84885	4.09021	3.85891	3.79476	3.70527	3.96001	3.90769	3.75727	3.81496	3.87184	3.76863	3.83086	3.9423	3.83408	3.81983	3.8055	3.80084	4.6217	4.62253	4.41341	3.88133	3.91444	3.83665	4.47312	4.406	4.26499	3.86299	3.89792	3.77277	4.5818	4.61772	4.46922	4.20154	4.26498	4.08992	3.37689	3.48849	3.39041	4.55662	4.57861	4.60783	3.4075	3.4687	3.44954
Col26a1	ENSMUSG00000004415	2.82148	2.95152	3.08079	7.51629	7.35521	7.4051	2.61894	2.41376	2.55507	7.18321	7.20803	7.02708	2.77328	2.71393	3.00006	7.67318	7.48262	7.44962	2.13031	2.13077	1.79093	8.22868	8.33147	8.16271	3.25504	4.50441	4.41	8.11929	8.05408	8.06006	2.84144	2.8451	2.79876	8.80862	8.654	8.81022	4.39022	4.61435	3.89861	2.65176	3.05731	3.03315	8.38992	8.4202	8.50114	2.4777	2.07692	1.95686
Bid	ENSMUSG00000004446	4.24705	4.27439	4.3168	3.67172	3.86	3.73206	4.56758	4.54076	4.48864	3.3856	3.12971	3.23222	4.33633	4.30945	4.4365	3.10542	3.11904	3.27026	4.24749	4.1556	4.27411	3.40313	3.49559	3.37226	4.48341	4.43554	4.38653	3.5108	3.44098	3.51321	4.42987	4.41275	4.46444	3.10126	2.80325	2.93316	4.45709	4.39314	4.37204	4.30332	4.22587	4.18309	3.46399	3.52253	3.49729	4.31094	4.3506	4.24029
Ralb	ENSMUSG00000004451	5.11466	4.96163	5.02987	6.10446	6.25627	6.14942	5.35253	5.25746	5.2148	6.01968	5.89338	5.94181	5.11135	5.11885	5.09514	6.34949	5.97912	6.04926	5.14579	5.03791	5.1687	6.19942	6.31533	6.13814	5.25132	5.27307	5.21688	6.02579	5.98725	6.00232	5.12467	5.0892	5.24402	6.16028	5.96804	6.14528	5.16974	5.26698	5.05921	5.11565	5.10693	4.95052	5.98614	6.19858	6.00104	5.10183	5.12878	5.07346
Clec11a	ENSMUSG00000004473	1.25974	1.09181	1.13283	0.46391	0.49082	0.500532	0.961368	0.767925	0.838975	0.47309	0.422195	0.53976	0.978876	1.09399	1.12278	0.583015	0.541284	0.191835	0.920754	0.858303	1.06926	0.79423	0.794465	0.85367	0.93068	0.904802	0.88534	0.89862	0.693345	0.846845	1.01069	0.906448	0.952621	0.713098	0.499152	0.841829	1.31913	1.28189	1.45133	1.36273	1.30988	1.25609	1.7333	1.78145	1.66061	1.27229	1.1988	1.26425
Zfp324	ENSMUSG00000004500	3.30967	3.25223	3.25974	3.28063	2.86785	3.45841	3.25072	3.16298	2.967	3.47097	3.38912	3.42487	3.08936	3.01786	3.09281	3.36983	3.38287	3.36448	2.95689	3.04144	2.96891	3.77572	3.84502	3.59064	3.23482	3.22715	2.94603	3.76253	3.655	3.53257	3.1899	3.17173	3.02212	3.74437	3.76842	3.64617	3.40207	3.37456	3.20046	2.64335	2.85538	2.60564	3.85924	4.01754	3.60594	2.93976	3.14076	2.94273
Gab2	ENSMUSG00000004508	2.81618	2.94752	2.92911	2.93874	2.46951	2.96124	2.28867	2.28784	2.15368	3.37132	3.37372	3.35484	2.32513	2.39047	2.38429	3.0312	3.01625	3.093	2.29918	2.23953	2.31129	3.11216	2.89589	2.82909	1.86314	1.79916	1.73381	3.15018	2.95419	3.12631	1.73721	1.75877	1.87267	2.88071	2.93334	2.87851	2.93718	2.91607	2.81074	1.83048	1.7774	1.73355	3.48204	3.25463	3.33497	1.55064	1.51448	1.41398
Ndrg2	ENSMUSG00000004558	5.26238	5.18986	5.25789	1.56774	1.81048	1.67872	5.71833	5.79326	5.68217	1.95822	1.92625	2.05814	4.931	5.01135	5.10475	2.03765	1.83923	1.89011	6.04369	6.14992	6.35594	2.59234	2.48278	2.41522	5.07388	5.05425	5.07118	3.05428	2.83326	2.72098	4.96792	4.89077	4.87999	3.00076	2.79465	2.90575	5.46219	5.38386	5.30226	5.36513	5.2764	5.44631	4.07705	4.12079	4.13558	5.03449	5.26699	5.19398
Mettl17	ENSMUSG00000004561	4.79802	4.78177	4.8334	4.29718	4.22261	4.33704	5.07143	4.9713	4.82192	4.53379	4.39065	4.43168	4.84419	4.84854	4.9018	4.27163	4.35564	4.30341	4.58709	4.57075	4.60026	4.20236	4.28019	4.04951	4.78093	4.70607	4.55361	4.37053	4.27001	4.27396	4.72109	4.69163	4.74962	4.43772	4.33692	4.24446	4.48479	4.5773	4.64584	4.69809	4.65333	4.92578	4.46108	4.34175	4.48503	5.01091	4.6776	4.84048
Arhgef40	ENSMUSG00000004562	5.46122	5.42828	5.41671	6.70893	7.0175	6.5193	5.54895	5.47102	5.24279	6.74669	6.52331	6.52132	5.11015	5.01836	5.37039	6.89208	6.61251	6.49855	6.00847	6.05428	6.18448	6.90917	6.96366	6.78384	5.62373	5.74836	5.59003	7.01655	6.77076	7.00523	5.52921	5.53555	5.42617	6.9331	6.91565	6.76984	5.38955	5.41151	5.38352	5.69021	5.94651	6.01587	7.00542	7.14065	7.38594	5.95999	5.6888	6.15712
Pnpla6	ENSMUSG00000004565	3.71405	3.59468	3.46718	2.72183	2.15701	2.75409	4.06174	3.80932	3.59741	2.91262	2.85667	2.7565	3.73729	3.84148	3.81617	2.75516	2.52901	2.49028	3.93168	3.903	3.96464	3.16753	3.15413	2.88081	3.93664	3.97018	3.8709	3.19467	2.99391	3.03236	3.9174	3.93901	3.92896	3.07272	3.13539	3.00436	3.7351	3.72127	3.64192	3.60581	3.74484	3.79922	3.09306	2.99514	3.19004	3.534	3.59659	3.67709
Arhgef18	ENSMUSG00000004568	4.16777	4.00119	4.07036	3.35737	2.9211	3.36665	4.16713	4.16643	3.96804	3.42474	3.46953	3.37904	4.03693	4.00973	4.08681	3.70309	3.38101	3.21134	4.5898	4.61081	4.67562	3.82058	3.69451	3.55357	4.45043	4.37572	4.30807	3.8136	3.63149	3.75348	4.31824	4.31371	4.27565	3.71507	3.75926	3.68413	4.17721	4.11038	4.07756	4.33277	4.43488	4.46774	3.91411	3.98566	4.00669	4.15226	4.27376	4.33882
Stxbp2	ENSMUSG00000004626	6.59058	6.46995	6.45949	3.55203	3.99494	3.62093	6.79136	6.60039	6.52419	3.25564	3.54964	3.62094	6.49549	6.67371	6.73969	3.46492	3.62387	3.42284	6.3382	6.28711	6.53966	3.85967	3.52835	3.33101	6.33157	6.33967	6.33304	3.55716	3.16377	3.42971	6.28779	6.22877	6.41251	4.00461	3.89012	3.97804	6.32338	6.26672	6.22895	6.53114	6.52872	6.53781	4.03951	3.86217	4.0942	6.51835	6.40951	6.61103
Pcp2	ENSMUSG00000004630	1.06156	1.20684	1.22896	0.889708	1.28696	0.441092	0	0	0.0947791	1.42064	1.21223	1.07539	0.101464	0.198549	0.106407	1.31257	1.44459	1.72718	0	0	0	0.812671	1.42342	1.27495	0.222529	0	0.253261	2.49509	2.36633	2.53712	0	0.0578291	0	2.54355	2.13049	2.19507	0.420684	0.828206	0.412435	0	0	0	0.0993301	0.223607	0.17097	0	0	0
Sgce	ENSMUSG00000004631	4.64413	4.78216	4.81293	4.53794	4.61592	4.61301	5.24591	5.2893	5.30412	4.70503	4.47162	4.40257	5.07585	5.01035	5.14523	4.28461	4.27946	4.49658	4.73866	4.66735	4.73274	5.03451	5.03773	4.83793	4.84494	4.93605	4.92617	5.02936	4.8396	4.77803	4.65756	4.62832	4.76576	5.16067	4.83037	5.08624	4.65465	4.63751	4.52445	4.60283	4.52871	4.47326	5.26862	5.3733	5.41537	4.52403	4.66013	4.52515
Chn2	ENSMUSG00000004633	4.26106	4.43457	4.53209	2.65649	3.03137	2.60994	4.31532	4.28388	4.42394	2.99078	3.15743	3.00264	4.26432	4.44758	4.40295	2.53583	3.382	3.12754	3.81777	3.70015	3.91931	3.22389	3.15093	3.09217	3.88702	3.75998	3.62581	3.0439	2.93299	2.91991	3.64552	3.52016	3.70271	3.23535	3.09436	3.13307	4.82113	4.76769	4.68194	3.50426	3.25752	3.39505	2.80518	3.00513	2.76829	2.9234	3.18687	2.95668
Wwox	ENSMUSG00000004637	2.9388	2.99364	3.04478	2.5342	2.51936	2.5205	2.92653	3.05253	2.72527	2.47235	2.6171	2.43003	3.08305	3.05739	3.00205	2.61441	2.47143	2.48058	3.14174	3.08261	3.13448	2.99573	2.91284	2.63923	3.20843	3.25767	3.12582	2.78323	2.59518	2.85282	3.18243	3.25683	3.16166	2.8422	2.6672	2.66251	3.33061	3.23199	3.20426	3.45101	3.5133	3.61965	3.23393	3.39608	3.44582	3.31815	3.58354	3.5283
Tyr	ENSMUSG00000004651	0	0	0	0	0	0	0	0	0	0.0121244	0.0119242	0	0	0	0	0	0	0	0.821873	0.312947	0.166717	0.234778	0.18369	0.17405	0	0	0	0	0	0	0.0286018	0.0467236	0.0116755	0	0	0	0	0	0	2.99145	2.81421	2.97532	0.0777677	0.203413	0.174348	0.0221719	0.282877	0.221579
Aqp1	ENSMUSG00000004655	0.273232	0.218951	0.280715	1.33708	1.19646	1.37665	0.353572	0.331148	0.207987	0.555166	0.567643	0.634669	0.223471	0.20558	0.230458	1.47654	0.789152	0.722831	0.24807	0.163697	0.29857	4.44979	4.4053	4.25146	0.698995	0.552734	0.608364	1.80455	1.50524	1.37148	0.503922	0.573734	0.570726	2.01408	1.86304	1.74007	1.11868	1.23334	0.92314	0.763333	0.762907	0.816526	5.16277	5.28199	5.26291	0.719735	0.692598	0.753534
Arid3b	ENSMUSG00000004661	6.80147	6.84725	6.76312	4.78156	4.19467	4.64041	7.01583	6.9209	6.7062	5.01384	4.96664	4.86995	6.90617	6.90974	7.01363	4.75462	4.85768	4.71342	5.86302	5.87148	5.99163	3.62504	3.80448	3.7155	5.68252	5.75084	5.7434	3.65725	3.74976	3.89932	5.81728	5.91	6.00633	3.68827	3.68724	3.71038	5.33763	5.37083	5.46091	4.81954	4.72605	4.88484	2.72914	2.66161	2.65865	4.67146	4.46271	4.60635
Cnn2	ENSMUSG00000004665	5.7398	5.56911	5.64456	8.12762	8.18126	8.0766	7.37769	7.14376	7.01981	7.31235	7.22926	7.13544	6.53982	6.63134	6.47673	7.17874	7.10361	7.12502	6.39779	6.25004	6.71129	7.78352	7.75225	7.59738	6.74267	6.65229	6.76887	7.65972	7.28319	7.50985	6.47215	6.35848	6.51562	7.82769	7.43714	7.5724	5.26583	5.38184	5.26184	6.28704	6.43225	6.46275	8.10007	8.09362	8.23176	6.72078	6.66178	6.73767
Hdac9	ENSMUSG00000004698	2.10547	2.15955	2.16191	1.65485	1.45505	1.72185	0.821731	0.85149	0.876091	1.07485	0.842248	0.90756	1.01439	0.875956	1.01209	0.777446	1.01452	0.933246	1.46288	1.474	1.4244	2.61384	2.34577	2.44373	1.04075	0.942198	0.901799	1.66384	1.62887	1.64345	1.23697	1.04707	1.08727	1.66796	1.64664	1.58075	2.47664	2.41305	2.48929	1.07548	1.0828	1.12008	2.67021	2.67733	2.49949	0.758429	0.847433	0.694763
Emr1	ENSMUSG00000004730	0.0678481	0.0651125	0.0802345	0.817784	0.808436	0.900295	0.0316264	0.0366249	0	0.784167	0.582147	0.708802	0.158499	0.0599498	0.0114927	1.11393	1.21827	1.28063	0.574275	0.314967	0.195955	1.50597	1.29064	1.10079	0.436835	0.352794	0.232069	1.62467	1.27888	1.22607	0.328242	0.22801	0.311219	1.25283	1.26824	1.01698	0.800521	0.699791	0.611801	0.414651	0.324064	0.305798	1.23175	1.1777	0.74587	0.126636	0.159952	0.153471
Mtfp1	ENSMUSG00000004748	3.36848	3.25444	3.30767	3.6697	3.89558	3.52099	2.4903	2.24672	2.20198	3.43274	3.42979	3.35411	2.37841	2.49408	2.48738	3.24807	3.34371	3.45585	1.87853	1.67688	1.84276	2.75292	2.89488	2.81575	1.62805	1.81575	1.71025	2.76411	2.88766	2.6969	1.92918	1.86072	2.02012	2.80639	2.66468	2.71555	2.68746	2.79613	2.5628	1.4372	1.92538	1.76887	2.26513	2.55989	2.36442	1.66259	1.66382	1.74309
Pgf	ENSMUSG00000004791	1.85299	1.58004	1.62504	1.57225	1.41099	1.39491	1.54194	1.51862	1.95875	2.33958	2.25021	2.62794	1.91693	2.1083	1.95581	2.45223	1.44664	1.54121	1.09173	0.881275	0.978012	1.96032	1.9684	1.80302	1.30696	1.1698	1.17915	3.07377	3.08942	2.93893	1.27418	1.12529	1.36043	2.17189	2.07174	1.75644	3.45267	3.21358	3.19184	1.52088	1.65714	1.45286	2.34573	2.28256	2.47416	1.32773	1.17994	1.44995
Ulk2	ENSMUSG00000004798	4.23413	4.30872	4.1974	4.449	3.87744	4.4634	3.8118	3.99647	3.92684	4.45847	4.4112	4.38855	4.00411	4.04226	4.12286	4.41857	4.54933	4.5148	4.22425	4.20315	4.1646	5.07288	5.02197	4.86216	4.16469	4.12421	4.0286	4.69647	4.69623	4.68478	4.10938	4.17342	4.01983	4.9739	4.98605	4.79631	4.64236	4.49302	4.45356	3.98298	3.86871	3.79929	5.16347	5.10077	4.85483	3.87637	3.97996	3.7399
Grap	ENSMUSG00000004837	0.0804171	0.0228044	0.0211314	2.35333	2.14085	2.41808	0	0.0485024	0.0484183	2.37301	2.20162	2.01617	0.205735	0.0241196	0.0888249	2.80057	2.38849	2.43372	0.156425	0.100752	0.025932	2.56676	2.67522	2.32861	0.0234308	0.025738	0	2.67529	2.59315	2.74286	0.0210821	0.124251	0.0255672	2.76004	2.61779	2.42742	0.347238	0.404112	0.264128	0.594138	0.290646	0.437229	2.22294	2.38729	2.27803	0.0245417	0.0900208	0
Chmp2b	ENSMUSG00000004843	6.20129	6.28558	6.3577	5.46669	5.93612	5.61906	6.16693	6.28508	6.51668	5.54251	5.58648	5.53556	6.51266	6.51388	6.40419	5.41836	5.53172	5.69025	7.03047	6.97314	7.01236	6.18893	6.05468	6.01688	6.7559	6.72156	6.96761	6.09356	5.91729	6.00968	6.85337	6.85914	6.88904	6.36322	6.17131	6.28373	6.76561	6.68125	6.72383	6.71475	6.65227	6.5125	6.34468	6.44447	6.31326	6.62647	6.62633	6.47179
Mapk13	ENSMUSG00000004864	6.21067	6.22674	6.15478	1.20546	1.6765	1.27961	5.39209	5.24077	5.16973	0.561325	0.419103	0.210248	5.6622	5.81099	5.65109	0.484172	1.15353	0.914482	5.42851	5.32864	5.50883	1.56884	1.67376	1.64401	5.53133	5.44474	5.46986	1.31977	1.0743	1.19334	5.70214	5.68442	5.60477	0.96001	0.777313	0.80999	6.02116	6.01624	5.96251	5.64075	5.76673	5.88097	2.14162	2.38946	2.41597	5.90942	5.89462	6.01695
Pax3	ENSMUSG00000004872	5.23026	5.36843	5.2482	5.52331	5.55089	5.58461	0.155493	0.328328	0.262826	1.62296	1.54362	1.56781	0.221084	0.338285	0.339096	4.09326	3.9057	4.03359	3.74462	3.89761	3.53749	6.23639	6.09885	6.07292	0.67177	1.79098	1.79564	4.35206	4.16272	4.28723	0.341223	0.349161	0.229427	5.8978	5.85439	5.95297	4.70553	4.83994	4.93424	4.18642	4.17863	4.46169	6.70195	6.59317	6.70628	0.27484	0.256764	0.15885
Crabp2	ENSMUSG00000004885	10.4254	10.4883	10.4574	10.5911	10.919	10.6938	7.53184	7.37864	7.55615	10.0554	10.1486	10.0949	8.38256	8.43467	8.40227	10.5575	10.415	10.5675	7.1607	7.02735	7.25813	9.40854	9.64195	9.49383	6.26842	6.2825	6.35388	9.24627	9.09702	9.33893	6.7701	6.81479	7.11323	9.39254	9.27903	9.50968	10.2747	10.2273	10.1422	6.6064	6.64394	6.59646	9.11072	8.85401	9.19369	6.67851	6.6234	6.61732
Nes	ENSMUSG00000004891	5.57329	5.54818	5.37813	6.02925	5.89771	5.9738	4.43669	4.2839	4.20306	4.75782	5.00956	4.73052	4.75098	4.85567	4.55251	5.38636	5.08248	4.91308	4.09738	4.22703	4.29308	5.17576	5.14766	5.09635	3.94569	4.0262	3.98137	5.14175	4.81062	4.90896	4.48445	4.45285	4.50096	4.80008	5.07349	4.85048	5.45942	5.51715	5.31265	4.31082	4.38327	4.50134	4.75957	4.70943	4.76183	4.3534	4.22752	4.35706
Hdgf	ENSMUSG00000004897	9.40642	9.46976	9.5029	8.9878	9.10705	9.04138	9.19153	9.21887	9.18998	9.07429	9.01244	9.05743	9.2495	9.27089	9.26273	9.10248	8.97466	9.10812	9.02177	8.95791	9.0884	8.40158	8.54189	8.28228	8.99636	8.9234	8.95114	8.36103	8.29306	8.48625	9.073	9.03493	9.12637	8.42851	8.41717	8.47639	9.34421	9.32099	9.29637	9.18301	9.11442	9.11588	8.3401	8.29134	8.35277	9.10373	9.18089	9.13592
Matk	ENSMUSG00000004933	2.50489	2.18678	2.19222	0.657128	0.678669	0.540346	1.79056	1.23189	1.27878	0.426477	0.503544	0.33526	2.02425	1.94702	2.0978	1.03703	0.580091	0.364083	1.89106	1.68927	2.12772	1.28415	0.901506	0.772279	1.44971	1.41947	1.47785	1.19739	1.05626	1.07587	1.7561	1.80285	1.81766	1.04551	1.015	0.753608	2.49219	2.53844	2.55594	1.57817	1.65848	1.74248	1.93179	1.88643	2.31911	1.72723	1.5616	1.9736
Hspb1	ENSMUSG00000004951	4.50812	4.06302	3.93571	0.367284	1.38114	1.17292	6.58022	6.27906	6.04622	1.17594	0.759444	1.2734	5.82566	5.57743	5.80157	0.361698	0.558731	0.784442	6.75184	6.71006	6.9336	2.07045	2.26245	1.92901	7.09776	7.06748	7.1284	3.06056	2.28088	2.28752	6.47723	6.52131	6.50667	1.66617	1.43263	1.44361	3.81482	3.87656	4.07327	6.90193	7.02615	7.17255	2.5269	2.80311	2.88831	6.83251	6.99957	7.05999
Rasa4	ENSMUSG00000004952	1.35616	1.33635	1.39824	0.532738	0.658685	0.771853	0.655828	0.485451	0.477195	0.765269	0.406165	0.595861	0.747419	0.986931	1.01821	0.824875	0.895148	0.342164	1.08856	1.19828	1.03371	1.91576	1.64878	1.33616	1.21405	1.18798	0.875328	1.97647	1.82437	1.54679	1.28344	1.0318	1.33942	1.50993	1.38903	1.32255	2.33459	2.33486	2.34009	1.47484	1.67742	1.79664	2.90848	2.777	2.9412	1.85313	1.36116	1.55059
Syt5	ENSMUSG00000004961	3.92824	3.741	3.95338	0.547932	0.739792	0.603501	2.51554	2.43442	2.28999	0.401537	0.487771	0.496329	3.41301	3.49172	3.63839	0.381866	0.362859	0.274222	3.71674	3.80186	3.85739	1.25385	1.06124	0.971648	3.29535	3.06725	3.09333	1.088	0.74982	0.81315	3.5675	3.43295	3.62127	0.798679	0.625736	0.656282	4.77376	4.71758	4.75428	3.48632	3.63229	3.6774	1.65931	1.87929	1.93743	3.02644	3.01325	3.18874
Cstb	ENSMUSG00000005054	6.96619	6.94044	7.00844	6.44729	6.89008	6.67703	7.67747	7.71416	7.72374	6.51415	6.57196	6.5828	7.79316	7.77679	7.67383	6.57619	6.52203	6.6809	7.94471	7.97344	8.06481	6.60707	6.70873	6.45796	7.77309	7.87177	7.93708	6.61376	6.41481	6.62453	7.73065	7.70894	7.82978	6.57311	6.57497	6.67414	7.19314	7.13629	7.06355	7.86521	7.75071	7.67874	6.77852	6.77501	6.90066	7.78271	7.76548	7.70078
Sh2b2	ENSMUSG00000005057	3.70369	3.53717	3.62215	4.22873	3.92682	4.08188	3.78175	3.5817	3.34366	4.24426	4.05697	4.1433	3.57916	3.4206	3.65507	4.30513	4.26994	4.1131	3.6655	3.70482	3.92089	3.88008	4.04933	3.92741	3.58579	3.71821	3.50894	3.89682	3.8935	3.8713	3.85016	3.80558	3.79658	3.87651	3.85422	3.9399	3.84526	3.92554	3.84035	3.47914	3.51402	3.45818	3.48112	3.49991	3.39602	3.12074	3.13286	3.37462
Cd44	ENSMUSG00000005087	2.85139	3.09561	2.71146	1.56139	1.20276	1.68655	2.89517	2.96298	2.85804	1.16343	1.14872	1.03449	2.75371	3.121	2.8954	1.21127	1.45176	1.29242	2.0007	2.08322	1.74203	2.21188	2.06696	1.86835	2.29063	2.36842	2.36165	1.49352	1.34018	1.27374	2.15874	2.22449	2.35792	1.97052	1.74697	1.7229	1.04218	1.19981	0.983711	2.48626	2.81331	2.71003	3.32749	3.1555	3.38058	3.7858	3.73451	3.49072
Slc1a2	ENSMUSG00000005089	0.327193	0.181003	0.398716	0.0822002	0.00334916	0.36169	0.0629286	0.0797503	0.175858	0.255567	0.107981	0.0266946	0.100391	0.205838	0.167924	0.089354	0.206867	0.334337	0.0211336	0.0200648	0.0167663	0.251728	0.0838084	0.0767811	0.0194527	0.0427966	0.0994397	0.218934	0.286556	0.175297	0.00274079	0	0.0953856	0.449525	0.476262	0.254928	0.101782	0.199197	0.301191	0.082748	0.100594	0.0193129	0.45352	0.415172	0.540421	0.0205001	0.0194493	0
Slc2a9	ENSMUSG00000005107	0.301675	0.189689	0.24171	0.462268	0.250223	0.342732	0.900618	0.577637	0.580949	0.656193	0.533393	0.541817	0.701065	0.563644	0.541833	0.551397	0.347111	0.583693	0.888651	0.851598	0.61154	0.584903	0.624033	0.605365	1.34662	0.911748	1.03453	0.415594	0.465519	0.445982	1.10825	1.07447	1.05895	0.456389	0.529883	0.39069	0.819495	0.703843	0.573881	0.928161	1.057	1.07309	0.623066	0.504213	0.564288	1.66771	1.85892	1.69415
Wisp1	ENSMUSG00000005124	1.08355	1.09595	1.10985	1.85243	1.54127	1.91278	2.78292	2.72752	2.64245	0.90717	0.941022	0.987533	2.89039	3.01229	2.85922	1.16899	0.775101	0.945587	2.85231	2.77	2.80577	2.4934	2.2942	2.20472	2.95965	2.88614	2.82114	3.02814	2.63777	2.50884	2.85816	2.91587	2.88354	2.55911	2.3106	2.20278	1.38823	1.23961	1.1979	2.50626	2.65944	2.53959	3.24259	3.17887	3.13766	2.87885	2.60408	2.74749
Ndrg1	ENSMUSG00000005125	3.20281	3.17135	3.30291	1.12685	0.777254	1.38046	2.80416	2.63453	2.54171	1.08306	1.20956	1.55965	2.88717	2.89635	2.97263	1.75945	1.51154	1.49995	2.9805	3.06613	3.02011	2.03866	1.84202	1.92112	2.67286	2.85378	2.91103	2.3286	2.09456	2.14657	2.88343	2.98472	2.98558	2.36047	1.95718	2.05542	4.42208	4.48754	4.23685	3.06459	3.03844	3.13844	2.93545	3.00006	2.97343	3.53476	3.59473	3.60693
4930550C14Rik	ENSMUSG00000005131	0.739065	0.510791	0.540445	0.168346	0.479257	0.381148	1.34874	1.25989	1.37997	0.272607	0.271546	0.395052	1.23279	0.869757	1.07866	0.605677	0.203018	0.372061	1.25166	0.975289	1.01478	0.479067	0.564842	0.316623	1.07342	0.916116	1.08327	0.348673	0.334519	0.595201	1.19068	1.19619	1.31346	0.341773	0.24124	0.253332	0.743489	0.560163	0.528211	1.53078	1.35652	1.36058	0.582936	0.784532	0.822263	1.25662	1.11745	1.61826
Klf5	ENSMUSG00000005148	3.84037	3.88644	3.77182	0.543989	0.288106	0.534914	4.42231	4.52506	4.39728	0.713894	0.452802	0.563402	4.88988	4.74218	5.05522	0.442278	0.684741	0.664941	4.94366	5.02793	4.66547	0.576183	0.683928	0.806793	5.62445	5.73682	5.26719	1.10751	0.588381	0.866949	4.77144	4.71033	4.71328	1.11339	0.881004	0.839676	4.38027	4.25661	4.21604	5.11136	5.39833	4.8898	1.97421	2.01628	1.68591	5.84302	6.17393	6.06252
Corin	ENSMUSG00000005220	0.0089665	0.0294871	0.0112026	0.581384	0.307529	0.365159	0.129583	0.0734818	0.0535899	0.355445	0.143507	0.233796	0.0622791	0.229204	0.182174	0.200297	0.151389	0.0865036	0.0595832	0.0979083	0.0880452	0.527464	0.362231	0.450597	0.113836	0.139839	0.100072	2.04823	1.87423	1.77593	0.0333481	0.125531	0.072055	1.0095	0.75087	0.689486	0.0936429	0.193181	0.0746035	0.02176	0.0601797	0.055446	0.585707	0.673791	0.632155	0.122326	0.0361419	0.0896383
Plekha8	ENSMUSG00000005225	4.54652	4.65524	4.66507	4.78511	4.19338	4.83672	4.3926	4.53307	4.53744	4.57469	4.58236	4.57736	4.53375	4.6255	4.60088	4.8307	4.79009	4.77125	4.60058	4.6384	4.59024	5.14432	5.10486	4.86004	4.57237	4.66229	4.48301	5.01693	4.90102	4.85942	4.62771	4.68777	4.63312	5.02689	5.06525	4.92723	4.45079	4.55099	4.3169	3.81277	3.71361	3.58257	4.75186	4.67945	4.46379	3.63587	3.59113	3.45063
Spc25	ENSMUSG00000005233	6.42794	6.54164	6.62978	7.02991	7.53908	7.23762	6.34518	6.41604	6.64628	7.06129	7.06187	7.15553	6.40184	6.34607	6.31301	7.50027	7.04156	7.22747	6.48609	6.34884	6.42904	6.98863	7.01352	7.02764	6.36382	6.35015	6.4238	6.92448	6.8827	6.94543	6.46058	6.4759	6.50177	7.10747	7.02518	7.16927	6.71283	6.61063	6.54555	6.23435	6.31779	6.20267	6.52209	6.58855	6.56059	6.40877	6.37996	6.37553
Dnah2	ENSMUSG00000005237	0.976713	0.952342	0.538394	0.633475	0.0746637	0.509689	0.850921	0.495026	0.712756	0.478033	0.48819	0.698657	0.627907	0.656516	1.00891	0.663845	0.869064	0.608539	0.554568	0.85464	0.694067	0.836129	0.892446	0.820223	0.874301	0.724187	0.670046	0.950245	0.900581	0.688247	0.653894	1.06306	0.579084	0.886703	0.840606	0.831975	0.912461	0.918059	0.902891	0.970824	1.0878	1.07315	2.05826	1.92455	1.8613	0.923139	0.873959	0.817411
Ripk4	ENSMUSG00000005251	4.81859	4.67833	4.71158	0.127257	0.106688	0.34826	5.45224	5.20832	5.07958	0.077175	0.075882	0	5.33397	5.33579	5.30847	0.203912	0.189149	0	5.51968	5.51108	5.50116	0.109183	0.0526219	0.172147	5.74505	5.65627	5.60745	0.0680138	0.0439152	0.122237	5.58234	5.57717	5.4909	0.0939038	0.0884338	0.0107179	4.98214	4.93533	4.93249	5.14998	5.13895	5.04984	0.494028	0.757436	0.374101	5.24593	5.45884	5.26386
Zfp287	ENSMUSG00000005267	2.94938	2.94742	2.95319	3.28659	2.61012	3.32569	2.63211	2.58154	2.687	3.1702	3.27908	3.21512	2.78376	2.96615	2.97135	3.2144	3.29193	3.37495	2.53678	2.71799	2.55723	3.66917	3.56291	3.38204	2.60222	2.70617	2.59304	3.50276	3.32291	3.29852	2.642	2.73934	2.66774	3.46845	3.5476	3.38837	2.91479	2.92046	2.83884	2.36791	2.40112	2.41353	3.73077	3.82798	3.58027	2.35683	2.46697	2.40013
Prlr	ENSMUSG00000005268	0.312339	0.29147	0.35218	0.0154108	0	0	0.838384	0.893913	0.93042	0	0	0.0244042	0.825241	0.620707	0.627344	0	0.0202106	0	1.61016	1.6049	1.63203	0.00359444	0.0120372	0.00348896	1.25986	1.39652	1.17618	0.00710215	0.0147382	0.0111874	1.13303	1.00915	0.954768	0.0979579	0	0.00375476	0.604616	0.589	0.40227	1.43998	1.08428	1.06585	0.230856	0.143676	0.136303	1.27609	1.26838	1.29281
Fgfr4	ENSMUSG00000005320	0.314427	0.42407	0.188267	0.712452	0.362254	0.438215	0.256353	0.461715	0.304113	0.439671	0.582005	0.500611	0.319072	0.500119	0.313386	0.779355	0.75329	0.493239	0.241168	0.1621	0.25795	0.775101	0.785248	0.650032	0.162329	0.156076	0.085058	1.82133	1.60304	1.21319	0.178155	0.203944	0.160066	0.876997	0.610136	0.50496	0.154425	0.133337	0.171212	0.105008	0.164324	0.16167	1.03938	1.19161	1.18731	0.101905	0.116141	0.136663
Cadm3	ENSMUSG00000005338	3.50654	3.57963	3.69612	2.13498	1.84705	2.43071	2.56319	2.28513	2.34159	0.919496	0.953581	1.09628	2.18332	2.14378	2.34502	1.0729	1.90959	0.979451	1.84156	2.05444	2.28448	3.07701	2.95978	2.88283	1.73372	1.89336	1.69892	1.74982	1.51255	1.31701	2.05733	2.06935	1.93272	2.35577	2.17124	2.02197	4.21036	4.17895	4.00574	1.3249	1.02516	1.29821	4.17702	3.98565	4.1353	1.14356	0.871512	1.11198
Casp14	ENSMUSG00000005355	0.0368209	0	0.014272	0	0	0	1.02569	1.12433	1.19518	0	0	0	0.49138	0.509203	0.683317	0	0.0297845	0	0.3866	0.285856	0.362527	0	0	0	1.19575	1.13813	1.15116	0	0	0	0.453623	0.310332	0.38744	0	0	0	0.0456485	0.0833749	0.0704215	0.35914	0.438089	0.232431	0	0	0	1.02442	1.20184	1.34668
Slc1a6	ENSMUSG00000005357	1.24214	1.2004	1.34921	1.3793	1.70361	1.02201	1.3899	1.55943	1.51351	0.501655	0.709074	0.276632	1.23789	1.3473	1.19829	0.24024	0.697794	0.683778	1.02818	1.01669	1.13396	1.7158	1.94672	1.66537	1.03824	1.10913	1.12089	1.39176	1.28766	1.35206	1.08302	0.898347	1.16755	1.80437	1.71198	1.68585	1.42694	1.47424	1.71605	0.469024	0.650866	0.632632	1.88444	1.91193	1.81836	0.617302	0.573622	0.642842
Slc1a3	ENSMUSG00000005360	3.48523	3.47519	3.4243	3.74671	3.36054	3.77497	4.53774	4.45537	4.60798	2.43478	2.46541	2.33876	4.60535	4.58176	4.57402	3.36863	3.49447	3.52223	4.09747	4.20958	3.99567	3.33304	3.25755	3.19085	3.60869	3.67778	3.72478	3.25329	2.8685	2.99453	3.7105	3.65965	3.74311	3.72807	3.85288	3.70333	2.62037	2.59439	2.613	4.19416	4.14927	4.30685	3.28149	3.41238	3.24848	3.31191	3.55917	3.6075
Mlxipl	ENSMUSG00000005373	2.97246	2.90181	2.91523	1.85716	1.59114	1.91414	2.0024	1.95941	1.8852	1.62539	1.43927	1.49137	2.18856	2.31429	2.36372	1.95352	1.87779	2.14282	1.62462	1.70637	1.85611	1.86181	1.98298	1.98885	1.28506	1.29314	1.50164	1.65574	1.58161	1.61207	1.50473	1.36508	1.30456	1.68401	1.64243	1.77092	2.60565	2.67022	2.66781	1.44491	1.38939	1.24251	2.05866	1.82399	2.31053	1.15346	0.911196	1.36676
Nid1	ENSMUSG00000005397	0.929364	1.38476	1.35346	6.59246	6.01644	6.54735	1.09752	1.08145	1.12848	5.76287	5.85365	5.67384	0.93413	0.905415	1.04297	5.61178	5.74618	5.72969	1.15034	1.03889	0.909904	6.13306	6.07072	5.83901	1.3264	1.88344	1.62036	6.04604	5.73056	5.72542	1.34508	1.30762	1.28078	5.5796	5.82523	5.52246	2.08105	2.2282	0.994179	1.68655	1.85691	2.12615	6.17884	6.29982	6.49197	1.25915	1.35565	1.54311
Mcm5	ENSMUSG00000005410	7.41304	7.3892	7.30994	7.56615	7.4094	7.48132	7.39104	7.18801	7.00679	7.59926	7.58265	7.5539	7.06158	7.04757	7.03552	7.51896	7.45991	7.47503	6.83431	6.80409	6.91613	7.26292	7.39384	7.26304	6.89926	6.82435	6.75397	7.3936	7.21253	7.4031	6.93207	6.94767	6.88969	7.4361	7.37369	7.42997	6.98942	6.96899	6.92772	6.4601	6.54086	6.60959	6.6313	6.7665	6.67849	6.58607	6.64219	6.62504
Hmox1	ENSMUSG00000005413	3.62967	3.62219	3.61953	4.45699	4.51655	4.43174	3.65867	3.38366	3.5454	4.48048	4.44467	4.48043	3.62495	3.48769	3.6122	4.3658	4.40888	4.56071	3.9183	3.90708	4.13259	4.61259	4.59729	4.40534	3.38188	3.33907	3.31655	4.68285	4.58259	4.68792	3.32353	3.40415	3.53245	4.87352	4.80009	4.80556	3.20464	3.33209	3.12768	3.41756	3.11001	3.35543	4.4851	4.5358	4.6833	2.79019	2.70297	2.64379
Cic	ENSMUSG00000005442	6.69688	6.59799	6.62174	5.92026	5.86372	5.82113	6.7984	6.5789	6.29837	6.14753	5.93426	6.01766	6.56346	6.49722	6.77406	6.2487	6.05756	5.92714	6.32636	6.43663	6.34119	6.47877	6.41663	6.18784	6.43164	6.4078	6.23427	6.47457	6.2677	6.33741	6.33361	6.38744	6.31225	6.52068	6.54136	6.28667	6.73528	6.67512	6.56594	6.36984	6.43555	6.45562	7.07919	7.00114	7.01304	6.55908	6.52746	6.57873
Asf1b	ENSMUSG00000005470	5.86387	5.83655	5.86014	6.05825	6.14716	6.19868	5.56194	5.51237	5.54105	6.14981	6.1486	6.11588	5.50086	5.41294	5.39075	6.10922	6.10113	6.15574	5.24484	5.22506	5.29482	5.54301	5.69184	5.47104	5.20821	5.20454	4.96808	5.67383	5.59735	5.68839	5.31345	5.37128	5.37757	5.6386	5.68944	5.69778	5.77053	5.75186	5.58779	5.30305	5.35294	5.3689	5.21449	5.24459	5.29718	5.44401	5.46217	5.36742
Ddx39	ENSMUSG00000005481	6.98492	6.9767	6.97047	7.13232	7.43863	7.25369	6.97747	6.75314	6.67709	7.10425	7.16006	7.09239	6.45908	6.51503	6.43734	7.41251	7.23055	7.16727	6.51796	6.37788	6.57237	6.58323	6.74405	6.60571	6.6146	6.46894	6.3917	6.73478	6.6716	6.80808	6.53886	6.55354	6.5863	6.72827	6.7132	6.83097	6.958	6.89857	6.87312	6.08775	6.1581	6.19126	5.71238	5.90016	5.82827	6.31233	6.24769	6.26383
Evx1	ENSMUSG00000005503	0.211242	0.0772055	0.0908242	0	0	0	1.36434	1.16661	1.288	0	0	0	0.235619	0.289628	0.305396	0	0	0	1.42922	1.35354	1.27186	0	0	0.114879	1.31083	1.45036	1.36105	0	0.0133067	0	0.866795	0.687207	0.735465	0.0428427	0.0399551	0.0134919	0.0740885	0.108509	0.170379	1.04548	1.03241	0.952087	0.0117756	0	0	1.07603	0.736284	0.828397
Kbtbd4	ENSMUSG00000005505	5.34286	5.18316	5.25919	5.38032	5.2931	5.38493	5.08151	5.00492	4.89685	5.50322	5.41223	5.46901	4.99807	4.99737	5.12008	5.25657	5.40794	5.48093	4.89384	4.75799	4.77766	5.49162	5.65836	5.44323	5.07174	5.04865	4.85792	5.6105	5.44057	5.61261	5.0268	5.05587	4.92759	5.66741	5.57298	5.63607	5.2283	5.15665	5.03461	4.47638	4.53679	4.51266	4.96617	5.24642	5.08328	4.6145	4.70826	4.52295
Por	ENSMUSG00000005514	6.43586	6.53175	6.45278	6.29942	5.6793	6.10005	6.21866	6.07724	5.84867	6.34317	6.7906	6.30357	5.88093	6.04915	5.98348	6.20109	5.96203	6.01912	5.56172	5.61238	5.6611	6.22313	6.33664	6.08144	5.67257	5.5531	5.48013	6.32815	6.16305	6.34237	5.69489	5.64617	5.64953	6.30563	6.17363	6.27958	6.64918	6.58647	6.51277	5.73157	5.87234	6.13678	6.35534	6.27566	6.30959	5.89994	6.04309	5.93203
Igf1r	ENSMUSG00000005533	5.02258	5.06912	4.91905	4.53437	2.94057	4.51612	5.28048	5.21798	5.05755	4.33335	4.54161	4.19896	5.12425	5.24537	5.18331	4.65201	4.58158	4.56784	4.64623	4.76583	4.57442	4.91961	4.79168	4.54879	4.93668	5.03249	4.81674	4.64892	4.45187	4.36457	4.79869	4.83057	4.73903	4.38346	4.88324	4.42641	5.25715	5.27586	5.06627	4.1379	4.33738	4.31187	4.69638	4.66638	4.32795	4.404	4.35439	4.30262
Cyp2a5	ENSMUSG00000005547	0.245705	0.416854	0.297844	0	0	0	0.178544	0.138112	0	0	0	0	0	0.236283	0.122942	0	0	0	0.0562794	0.046756	0	0	0	0	0	0	0	0	0	0	0	0	0	0	0	0	0.381112	0.190028	0.292579	0	0.0902132	0	0.0172513	0	0	0	0	0
Adcy9	ENSMUSG00000005580	0.804684	0.621656	0.788524	0.603088	0.133086	0.552312	0.276235	0.297162	0.27327	0.467015	0.513226	0.528236	0.35787	0.449105	0.447328	0.65349	0.72007	0.610882	0.511733	0.475242	0.427011	0.919822	0.942645	0.886435	0.366144	0.388468	0.337511	1.01838	0.826636	0.815806	0.459701	0.491289	0.367563	0.93146	0.963271	0.688296	0.71462	0.787838	0.569567	0.758669	0.56864	0.645991	1.52913	1.52069	1.26093	0.318105	0.420492	0.444379
Mef2c	ENSMUSG00000005583	0.277225	0.25537	0.286336	2.98786	2.3622	2.90537	0.114118	0.0980783	0.181292	3.01004	2.82395	2.88095	0.256503	0.165422	0.221548	3.38938	3.27674	3.32245	0.571108	0.392636	0.202059	3.44007	3.19318	2.91342	0.232524	0.342856	0.39281	3.54699	3.26507	3.08184	0.396254	0.312764	0.227878	3.81534	3.74387	3.29459	1.60214	1.51092	1.13414	1.17739	1.0859	1.14628	4.72809	4.64918	4.65145	0.235522	0.458355	0.228294
Mrvi1	ENSMUSG00000005611	0.015767	0.00654623	0	1.24094	0.976735	1.09039	0.0182591	0	0.0272301	0.808775	0.570056	0.976665	0.0490148	0.013584	0.0253947	0.509769	0.744899	0.785684	0.00668095	0	0	1.862	1.37296	1.48416	0.00650604	0	0.0301055	1.63413	1.76949	1.7553	0.00593112	0.0218008	0.101207	1.26671	1.55636	1.41667	0.184401	0.469905	0.0891826	0.0318569	0	0	1.06479	1.06539	0.76717	0	0	0
Pcyt1a	ENSMUSG00000005615	4.82531	4.82025	4.82794	5.51225	5.03706	5.55203	4.62536	4.49888	4.62282	5.18784	5.23165	5.06788	4.53969	4.65389	4.65037	5.66	5.6335	5.71775	4.48327	4.4708	4.5143	5.36686	5.42972	5.26973	4.39518	4.32805	4.27668	4.92721	4.76483	4.92971	4.54332	4.41839	4.43407	5.34418	5.40853	5.38737	4.73984	4.70741	4.61109	4.9097	4.70632	4.72587	5.10226	5.15182	5.00182	4.26496	4.47224	4.30437
Tmod4	ENSMUSG00000005628	0.290676	0.566215	0.647778	0.980645	1.45121	0.689516	0.180593	0.450555	0.550164	0.730338	0.623576	0.450812	0.393157	0.506907	0.249527	0.745296	0.737453	0.590198	0.465011	0.295952	0.316464	0.618211	0.25189	0.272365	0.36168	0.150579	0.719404	0.493869	0.760948	0.675084	0.543327	0.287803	0.379234	0.544807	0.594712	0.715457	0.395545	0.322059	0.473847	0.464791	0.450025	0.496372	0.66505	0.724909	0.685546	0.808502	0.370961	0.3497
Insrr	ENSMUSG00000005640	0.251198	0.300234	0.205983	0.0672655	0.159881	0.033559	0	0.0160177	0	0.100422	0.097979	0.138966	0.0217141	0.0315925	0.0475496	0.0543783	0.247666	0.122136	0.0304923	0.0241914	0.0337733	0.529958	0.446726	0.369324	0	0.0156882	0.00867962	0.268742	0.290717	0.229979	0.006928	0.0168302	0	0.275392	0.287166	0.22633	0.955259	0.933026	0.710593	0.00757783	0	0.0069976	0.618385	0.67038	0.633834	0	0	0
Mthfd2	ENSMUSG00000005667	5.30642	5.40566	5.5577	6.14495	6.24612	6.14782	4.9819	5.04816	4.97522	6.13654	6.12343	6.1824	4.86756	4.79849	4.8261	6.30251	6.21927	6.13455	4.46946	4.47091	4.58004	5.67996	5.72326	5.67687	4.72944	4.54739	4.61442	5.72118	5.63788	5.78247	4.63487	4.56237	4.64864	5.72558	5.78283	5.86174	5.2377	5.19312	5.13223	4.48789	4.39776	4.44375	5.12843	5.31548	5.17043	4.71896	4.41598	4.55607
Kit	ENSMUSG00000005672	5.2673	5.34129	5.21163	3.56376	2.83826	3.02008	4.29692	4.38122	4.30663	3.58057	3.6265	3.49475	4.31142	4.48831	4.30718	3.28873	3.55228	3.28144	4.14534	4.19559	4.01843	2.75169	2.63237	2.45488	4.35859	4.44145	4.18123	3.16237	3.11892	3.06504	3.99911	4.05131	4.06956	2.6099	2.55401	2.37025	5.20156	5.30182	5.26693	4.40988	4.36372	4.60556	2.20994	2.34521	2.37239	3.54336	3.40974	3.5337
Apoa2	ENSMUSG00000005681	1.54309	1.44686	1.35643	1.03142	1.29061	1.29397	1.59457	1.44197	1.40727	1.64935	1.0308	1.20104	1.87479	1.82273	1.94704	1.29545	2.01909	1.86521	0.538589	0.481837	0.679117	0.968067	1.27997	0.934789	0.532863	0.767659	0.495288	1.06508	0.54388	1.08517	0.548008	0.847968	0.36319	0.649116	0.335874	0.908857	1.16606	1.04548	1.06316	0.474276	0.22076	0.385416	0.449264	0.41536	0.48734	0.324362	0.412625	0.25217
Ampd3	ENSMUSG00000005686	2.45029	2.41755	2.36158	1.75012	1.57294	1.43386	1.04203	0.864761	0.877273	0.424222	0.638599	0.502505	0.541946	0.674316	0.642631	2.32522	0.73435	0.883879	1.08136	1.14611	0.65539	1.17642	1.01719	1.00819	0.903506	0.753949	0.946432	1.28079	1.05738	1.03896	1.30964	0.879566	1.05087	0.734448	0.766069	0.734521	2.63633	2.53109	2.43748	1.40911	1.59624	1.45997	1.28756	1.3174	1.35299	1.60239	1.62497	1.6757
Pard6a	ENSMUSG00000005699	3.38511	3.01431	3.34204	2.65851	3.29189	2.70728	3.04285	2.83332	2.48787	2.86552	2.9215	2.76786	2.63663	2.65318	2.79543	2.77293	2.89764	2.74137	2.79186	2.77254	2.95416	3.12956	3.16039	3.12604	2.93859	2.73522	2.84222	3.18145	3.18975	3.18248	2.96084	2.81979	2.95228	3.27068	3.27924	3.37542	3.68616	3.61941	3.60764	2.94878	2.94024	2.90944	3.04699	3.2193	3.16721	3.14421	3.07454	3.00725
Ranbp1	ENSMUSG00000005732	9.59482	9.77387	9.70606	10.1665	10.677	10.2459	9.50484	9.67429	9.78259	10.1266	10.0458	10.1038	9.52942	9.57003	9.59762	10.3601	10.1259	10.3074	8.82744	8.73102	8.8054	8.97962	9.09116	9.00559	8.74541	8.90987	8.82278	9.12678	9.0771	9.14908	8.80089	8.77083	8.92387	9.05259	9.02793	9.14605	8.90627	8.90289	8.92654	8.81233	9.01834	8.69137	8.83292	8.84926	8.89591	8.77311	8.84616	8.96864
Cd247	ENSMUSG00000005763	1.37365	1.5194	1.52407	0.522888	0.673519	0.562154	0.383626	0.329009	0.412439	0.471945	0.731282	0.60652	0.782689	0.780394	0.812682	0.033917	0.222728	0.353195	0.580776	0.611546	0.73322	0.619205	0.454517	0.395423	0.210944	0.163722	0.202909	0.237625	0.140521	0.303381	0.47913	0.848132	0.592701	0.210749	0.105879	0.149465	2.54348	2.36701	2.32062	1.10308	0.904403	1.07797	0.419361	0.355669	0.524126	0.0738497	0.243902	0.0529584
Slc30a4	ENSMUSG00000005802	3.65921	3.69872	3.64956	3.86341	3.62211	4.01346	3.3352	3.40169	3.62128	3.69687	3.79162	3.76301	3.39209	3.35025	3.31198	3.44791	3.88254	3.87985	4.34584	4.40562	4.30797	4.50802	4.3425	4.32217	3.90011	3.82093	3.96541	4.23316	4.18622	4.09177	3.9606	3.88867	3.87933	4.39308	4.33082	4.28013	3.88838	3.87053	3.81813	4.45516	4.28989	4.18643	4.58031	4.55145	4.36006	4.25403	4.32922	4.00298
Sqrdl	ENSMUSG00000005803	1.28494	1.06435	1.3263	1.31465	1.83784	1.13139	1.41111	1.74646	1.54429	0.972052	2.04557	1.51336	1.66583	1.42886	1.3905	1.24003	1.22014	2.02886	1.60589	1.76573	1.99164	1.73649	1.86967	1.61511	1.43816	1.30862	1.30145	1.98328	1.66962	1.81764	1.33813	1.22064	1.12015	1.49008	1.37691	1.37429	1.36696	1.49998	1.14591	1.53095	1.38297	1.59798	2.09788	1.94764	1.70632	0.952277	1.16274	1.15429
Gata6	ENSMUSG00000005836	0.225688	0.170176	0.130275	0.372479	0.470093	0.47289	0.79288	0.81704	0.674448	0.530309	0.350463	0.341994	0.584126	0.804076	0.700559	0	0.259497	0.298251	0.42695	0.40912	0.705342	0.358761	0.273738	0.189831	0.273499	0.435284	0.445794	0.232976	0.114896	0.149774	0.308194	0.255354	0.336101	0.355711	0.389989	0.23456	0.0224951	0.0511226	0.05991	0.2687	0.181025	0.195985	0.666313	0.624871	0.589528	0.0481294	0.0672126	0.286041
Rsl1d1	ENSMUSG00000005846	7.84849	8.0369	7.97356	8.43585	8.84795	8.54368	7.70228	7.87405	8.07434	8.34727	8.44902	8.43308	7.77315	7.84202	7.74977	8.54852	8.5404	8.66826	7.56247	7.47786	7.56207	7.62072	7.61251	7.55887	7.70284	7.6065	7.70028	7.66689	7.62507	7.72363	7.62333	7.63148	7.74318	7.65668	7.5658	7.63665	7.73175	7.65328	7.63464	7.66275	7.58605	7.54846	7.44405	7.39398	7.44806	7.74214	7.70516	7.56425
Cnga2	ENSMUSG00000005864	0.041934	0.319687	0.533283	0.0886633	0.101877	0.0263427	0.0500983	0.121018	0.0497557	0.118073	0.0395948	0.0351584	0.109725	0.108311	0.0349174	0.194262	0.0338805	0.157804	0.0239555	0.0395413	0.0396272	0.116784	0.120821	0.0801891	0.0708666	0.0900727	0.0666848	0.115378	0.197468	0.0690052	0.094761	0.064883	0.0518091	0.0625114	0.169626	0.037535	0.625818	1.24853	0.553527	0.0695112	0.18118	0.043217	0.243675	0.222301	0.165695	0.0502501	0.0815252	0.18179
Apc	ENSMUSG00000005871	5.7349	5.90358	5.79092	5.06645	3.81771	5.0419	5.15402	5.27714	5.33617	4.79331	4.91478	4.70257	5.2141	5.30441	5.25247	4.83257	5.01071	5.03642	5.43117	5.57969	5.30222	4.87466	4.6583	4.54977	5.32859	5.34425	5.2483	4.6818	4.37983	4.41368	5.32809	5.31176	5.16301	4.39115	4.8246	4.46364	5.8241	5.8107	5.59809	5.34988	5.2413	5.13297	4.78996	4.61529	4.44095	5.26421	5.29262	5.25109
Reep5	ENSMUSG00000005873	4.32068	4.42295	4.53927	5.66627	5.63228	5.67015	4.87317	4.88015	4.88264	4.63025	4.63595	4.61218	4.92819	4.74836	4.9434	5.08084	5.16322	5.16567	5.52913	5.43316	5.5091	6.16537	6.1806	6.04742	5.50467	5.50102	5.44698	5.34719	5.23548	5.17599	5.56437	5.47614	5.47936	5.93587	5.76289	5.79188	4.89362	4.86318	4.75903	5.67762	5.66634	5.5738	5.97919	6.12826	5.98053	5.68406	5.78593	5.73997
Spo11	ENSMUSG00000005883	0.915234	0.959623	0.490481	0.0539702	0.0264978	0.0378396	1.53427	0.959138	1.123	0.0227375	0	0.00991211	0.885403	1.00165	1.18608	0	0.0284693	0.0770518	1.93725	1.99611	2.07661	0.181312	0.126731	0.115376	2.28269	2.38029	2.50838	0.110053	0.0208071	0.0675692	2.28813	2.38517	2.29042	0.0259609	0.0396936	0.114853	1.04154	0.765216	0.926761	2.94868	3.21133	3.442	0.0899674	0.0633788	0.0966934	3.04827	2.67326	3.33223
Ncoa2	ENSMUSG00000005886	5.24249	5.31006	5.22189	4.60815	3.62825	4.56434	5.39042	5.44982	5.15045	4.91831	4.88795	4.67538	5.29235	5.37701	5.32863	4.89872	4.62403	4.62365	5.22699	5.32645	5.16397	4.51445	4.46927	4.40548	5.24784	5.30154	5.11306	4.68437	4.58211	4.59644	5.09326	5.07586	4.99708	4.55958	4.85087	4.57122	5.11299	5.11747	5.11514	5.05991	5.10372	4.99946	4.81752	4.57727	4.53771	4.8395	4.98008	4.94325
Trh	ENSMUSG00000005892	1.20975	1.05153	1.38467	0.118953	0	0.031146	0.0382035	0.0285015	0.0566103	0.179037	0.0620532	0.131619	1.16646	1.05198	1.132	0	0.246133	0.300221	0.211099	0.0311359	0.0602822	0.111391	0.142956	0.0589896	0.0272822	0.0301639	0.0935994	0.107261	0.257081	0.10528	0.467701	0.380134	0.399372	0.17089	0.0555951	0.0874392	0.131975	0.256974	0.382148	0.550195	0.199688	0.517854	0.236872	0.108584	0.230681	0.0284895	0	0.0605324
Nr2c1	ENSMUSG00000005897	4.46515	4.50612	4.3963	3.89274	3.62368	3.96743	4.63969	4.61784	4.59698	4.08535	4.10308	4.08115	4.57679	4.59282	4.57497	4.10674	4.23128	4.21185	4.4823	4.49424	4.49812	3.95841	3.8326	3.74054	4.67981	4.69	4.60211	3.74297	3.61445	3.73105	4.43996	4.47211	4.50365	3.88923	3.82731	3.8256	4.54622	4.48467	4.44798	4.24701	4.23562	4.32787	3.88517	3.86088	3.94972	4.30839	4.38278	4.37015
Otx1	ENSMUSG00000005917	6.44278	6.613	6.58629	0.149166	0	0.276337	1.87367	1.99528	1.77169	0.183639	0.0701897	0.189985	4.92189	4.95636	5.17295	0	0.586978	0.145234	6.33796	6.42981	5.9808	0.13924	0.0806193	0.0934996	4.69744	4.57396	4.10399	0.157732	0.162914	0.222614	5.63748	5.54178	5.33041	0.0960069	0.0512433	0.040997	6.2294	6.26034	6.4301	6.21357	6.4188	6.35445	0.748625	1.03931	0.57707	5.64423	5.59025	6.00316
Shpk	ENSMUSG00000005951	0.560364	0.629947	0.536132	0.523336	0.476273	0.755009	0.551299	0.386709	0.387419	0.512477	0.660756	0.955056	0.579315	0.45498	0.373733	0.507601	0.768948	0.444923	0.607764	0.502724	0.554633	1.09663	1.15537	0.853213	0.608845	0.646981	0.501321	1.15943	0.839418	0.949915	0.605648	0.499931	0.547634	0.90689	1.02262	1.00204	0.751008	0.747257	0.685022	0.454126	0.705802	0.485767	1.03055	1.08674	1.03261	0.61782	0.670996	0.675351
Ephb3	ENSMUSG00000005958	4.97646	4.86222	4.82313	5.34176	5.34411	5.13663	5.59944	5.38238	5.01205	5.22849	5.0955	4.98788	5.10262	5.05352	5.16403	5.15315	5.05599	5.01269	5.32352	5.31337	5.35538	6.20375	6.08415	5.87148	5.37154	5.41742	5.25115	6.16538	5.83808	5.9142	5.43067	5.33632	5.32518	6.22446	6.12313	6.06519	4.99134	5.05876	4.88129	4.98331	5.26434	5.32108	6.35223	6.40051	6.57536	4.98425	5.07753	5.31659
Tuft1	ENSMUSG00000005968	2.96452	2.76902	2.85938	1.6927	1.35886	1.74616	4.00664	3.95726	3.98195	1.43631	1.33275	1.39885	3.80933	3.71582	3.67911	1.11692	1.2351	1.40316	4.04114	3.95116	3.99544	2.16377	2.09825	2.09448	4.36311	4.17941	4.17832	1.71202	1.65463	1.46629	3.98727	3.93862	3.96757	1.50339	1.4084	1.50599	3.26374	3.14507	3.08972	3.82236	3.80609	3.83038	1.84889	1.85935	1.878	4.41764	4.43174	4.26167
1700037C18Rik	ENSMUSG00000005983	2.40186	2.72679	2.17788	2.2488	2.43426	2.58273	2.51098	1.83918	2.43989	2.52339	1.8973	2.4714	2.44918	2.33817	2.37724	2.34457	2.29203	1.34456	2.5634	2.57686	2.48803	2.58867	2.61544	2.82509	2.44182	2.8366	2.4639	2.50086	2.46703	2.63474	2.44252	2.60789	2.21073	2.83169	2.82894	2.95079	2.97423	2.73636	2.85913	2.74106	2.6802	2.53892	2.33257	2.76745	2.74946	2.69748	2.59098	2.81033
Ankrd13d	ENSMUSG00000005986	2.55909	2.45078	2.58171	2.07767	1.75336	2.27381	2.70641	2.30649	2.44322	1.5574	1.78498	1.69561	2.66509	2.74934	2.75308	1.63939	1.7972	1.57126	2.73767	2.77761	2.97075	2.55422	2.69526	2.52955	2.86651	2.79714	2.86762	2.65926	2.73686	2.50436	2.86675	2.70879	2.57905	2.8045	2.57624	2.2955	2.82767	2.77233	2.65451	3.10361	3.05573	3.11016	3.108	3.19142	3.20964	2.94172	3.19876	3.18892
Prg4	ENSMUSG00000006014	0	0.0099839	0.0092754	0.264472	0.391277	0.328275	0	0	0.0104503	0.0562997	0.0102287	0	0	0	0	0.0437388	0.446305	0.077362	0	0.0113182	0	0.174909	0.2153	0.240634	0.0194659	0.0214917	0.0230741	0.0182492	0.0335143	0.0554862	0	0.0647288	0	0.45925	0.232723	0.168535	0.0388355	0.0180964	0	0.0249025	0.0176975	0	1.04277	0.884554	0.760423	0.0105003	0	0
Kptn	ENSMUSG00000006021	3.89056	3.89843	3.80147	3.66992	4.13416	3.74682	3.86627	3.8619	3.43616	3.81396	3.70755	3.88434	3.57535	3.55884	3.59806	4.10152	3.64844	3.7501	3.87172	3.84591	3.8633	4.26143	4.39194	4.04722	4.12635	3.99996	4.01319	4.47752	4.30824	4.35949	3.94144	4.01745	4.10233	4.40076	4.26483	4.2916	4.18133	4.12945	4.1506	3.89088	4.15116	4.06699	4.40577	4.4313	4.61281	4.18519	4.04501	4.19561
Atp5g1	ENSMUSG00000006057	6.44665	6.72413	6.71725	7.07473	7.50177	7.07221	6.74963	6.63595	6.33657	7.1376	6.71869	6.78487	6.31023	6.35569	6.41169	6.78069	6.82716	6.98943	6.92533	6.84634	6.93893	6.8073	6.98725	7.04224	6.98413	6.94403	6.56056	7.10117	7.19614	7.03233	7.11735	7.02759	6.80878	7.13604	6.95006	7.12929	6.90872	6.81359	6.74075	6.63862	6.74661	6.63782	6.04658	6.09219	6.13814	6.79642	6.78819	6.76319
Inpp5k	ENSMUSG00000006127	3.83045	3.8049	3.91465	3.50481	3.11024	3.29425	3.69563	3.69796	3.70685	3.32012	3.4646	3.44301	3.84286	3.91492	4.02634	3.2888	3.51773	3.39228	4.11899	4.05373	4.15494	3.63821	3.65488	3.48219	3.98905	4.06369	4.0123	3.40353	3.33424	3.4906	4.03489	4.09186	4.00508	3.63855	3.53687	3.51564	4.2737	4.15708	4.08916	4.19287	4.16811	4.18423	3.84997	3.70581	3.95897	4.1281	4.1522	4.21176
Upk3bl	ENSMUSG00000006143	4.53217	4.33054	4.32334	0.075079	0	0.147477	4.99356	4.80526	4.61008	0	0.158745	0	4.80267	4.71774	4.85352	0	0.244555	0.0756027	5.02665	4.77296	5.02793	0.0710271	0	0.0413735	5.73972	5.79599	5.65819	0.0833354	0	0.0810384	4.76093	5.06102	4.97794	0	0	0	4.8784	4.84946	4.71497	3.85492	4.26163	4.18812	0.431028	0.199031	0.361635	4.53829	4.67752	4.58209
Eps8l1	ENSMUSG00000006154	3.51056	3.58673	3.56112	1.9135	1.1994	1.87483	3.15102	2.92544	2.99216	1.63178	1.51965	1.9885	3.13219	3.27053	3.31757	1.01862	1.55961	2.68763	3.88708	3.74196	3.81531	2.30015	1.98231	2.07481	3.48943	3.51359	3.57236	2.03759	1.9631	2.38572	3.50929	3.51999	3.34589	2.06756	2.20891	2.4654	4.32204	4.11728	4.25487	3.65811	3.78856	3.7932	2.69572	2.21653	2.44518	3.53901	3.51004	3.6763
Prss16	ENSMUSG00000006179	0.81613	1.13007	1.34654	0.177673	0	0.120936	1.76744	1.15798	1.34557	0.129398	0.125139	0.156918	1.13377	0.745131	1.11054	0	0.155431	0.0892695	1.11923	1.17388	1.38602	0.244078	0.503654	0.403425	1.44284	1.34841	1.40772	0.309053	0.238661	0.3804	1.10597	1.14077	1.35542	0.295461	0.0547058	0.439453	0.839148	0.791212	1.01156	1.30711	0.849703	0.983312	0.190343	0.335064	0.210799	1.65376	1.56589	1.42438
Htra1	ENSMUSG00000006205	4.27976	4.05094	3.89843	0.746694	0.980905	0.867222	3.79385	3.78836	3.49742	1.26327	1.12611	0.674306	3.05659	2.97648	2.84648	0.994782	1.31254	1.2513	6.55853	6.66211	6.78242	1.44015	1.3229	1.22621	5.51685	5.40682	5.40965	1.75378	1.50454	1.6996	5.32044	5.20916	5.08862	1.68586	1.6852	1.75295	2.76835	2.62878	2.78101	6.94718	6.93907	7.25731	2.38626	2.39139	2.85324	6.43443	6.6195	6.48433
Fam131c	ENSMUSG00000006218	2.27508	1.89326	2.03095	0.273478	0.222479	0.226451	1.1522	1.03773	0.753749	0.149921	0.204147	0.053714	1.30252	1.44089	1.62458	0.0391948	0.0767569	0.0583241	1.44622	1.27102	1.39661	0.573116	0.627641	0.518753	1.28365	1.48118	1.21064	0.276504	0.262974	0.498165	1.31119	1.45825	1.63117	0.430833	0.157151	0.216478	2.97066	2.92421	2.85994	1.60826	1.67967	1.81122	0.674673	0.937902	0.748733	1.49713	1.32292	1.49299
Fblim1	ENSMUSG00000006219	5.69011	5.58724	5.5852	5.84804	5.37945	5.78655	6.81519	6.7339	6.57912	5.76818	5.62911	5.73823	6.32824	6.20835	6.62215	5.84764	5.51823	5.58439	6.08395	5.95463	6.11391	6.12502	6.15403	6.07654	6.10591	6.26006	6.11944	6.43806	6.248	6.41071	6.15962	6.09873	6.15169	6.2279	6.08787	6.15962	5.62079	5.59257	5.59408	5.95758	6.00075	6.01022	5.80428	5.85425	5.86009	5.98501	6.02269	6.10095
Epor	ENSMUSG00000006235	0.854439	0.752624	0.940418	2.64793	2.7211	2.84013	0.257931	0.301579	0.449255	2.11686	2.03081	2.39607	0.467627	0.367704	0.725143	1.91743	2.01572	2.25628	0.600263	0.652633	0.697326	2.57407	2.58742	2.25529	0.445514	0.691566	0.508848	2.40401	2.40481	2.28523	0.530058	0.673989	0.735833	2.46484	2.46322	2.46752	1.12023	1.32183	1.18731	0.627077	0.688045	0.761418	2.14135	2.11079	2.24189	0.609892	0.628193	0.444425
Ccdc159	ENSMUSG00000006241	1.23926	0.944726	1.05857	0.762773	0.624727	1.0711	1.15982	1.30094	1.13477	1.31154	0.76837	0.93501	0.992185	1.06429	1.13843	0.875563	0.813946	1.17721	0.825672	0.794456	0.907754	0.942739	1.27629	1.17082	1.11546	0.824449	1.1335	1.40817	1.25674	1.17135	1.01283	0.902309	1.05461	1.34315	1.3081	1.12502	1.21202	1.28281	1.32676	0.904345	0.74839	0.800628	1.53016	1.30324	1.42101	1.02316	0.799917	0.872306
Mob1b	ENSMUSG00000006262	4.55337	4.56216	4.56486	4.09662	3.69952	4.43654	4.19889	4.29263	4.54542	4.28986	4.38216	4.40481	4.41351	4.45239	4.31582	3.95606	4.31807	4.47431	4.87281	4.89559	4.89114	4.47556	4.26536	4.23274	4.76504	4.80194	4.82142	4.47769	4.28868	4.40764	4.8077	4.79671	4.74407	4.29957	4.4551	4.2993	4.94901	4.97591	4.83146	4.81132	4.64787	4.61747	3.78708	3.8118	3.50117	4.50487	4.38847	4.42444
Atp6v1b1	ENSMUSG00000006269	0	0.0193726	0	0	0	0	0	0	0.0207497	0	0	0	0	0.0204981	0	0	0	0	0	0.0435779	0	0	0	0.0384202	0.0198957	0	0	0	0	0	0	0	0.0216959	0	0	0	0.331154	0.169499	0.181482	0.0194013	0.112723	0	0.0883054	0.0196661	0.0473932	0.0414823	0.0580248	0.0880338
Vax1	ENSMUSG00000006270	3.82296	3.47952	3.48143	0.124216	0	0	0	0.0783573	0	0	0	0	0	0	0	0	0.0368984	0	1.34741	1.56203	1.78537	0.0787861	0	0	0	0.0420621	0.0444204	0	0.0430505	0.0374822	0	0	0	0.0821343	0.0390049	0	2.95197	3.27148	3.55136	0.887035	1.09353	0.879549	0.347319	0.25082	0.232803	0	0	0
Tep1	ENSMUSG00000006281	1.66424	1.55808	1.44114	1.57268	1.02443	1.44463	2.08791	2.081	1.85834	1.38004	1.38733	1.21948	1.91319	2.09821	2.02488	1.49191	1.44424	1.24557	2.43713	2.4957	2.48702	1.7584	1.70353	1.73353	2.27707	2.31183	2.30673	1.2685	1.1425	1.30432	2.25152	2.32911	2.27252	1.37912	1.63504	1.48916	1.54303	1.53838	1.5596	1.92658	1.97248	2.16053	1.35315	1.37093	1.45987	1.78959	1.75481	1.94603
Tmbim1	ENSMUSG00000006301	2.39863	2.49341	2.58852	3.30995	2.81941	3.38466	3.50995	3.7315	2.83222	3.24281	3.47117	3.08922	2.55299	2.97253	3.27056	2.37076	3.43869	3.24675	4.10353	3.93591	3.87323	3.12499	3.32094	3.23047	3.70707	3.81771	3.52522	3.12752	3.08811	2.75644	3.66364	3.80118	3.41389	2.96816	2.98851	2.89974	2.78757	2.84216	2.7118	4.46024	4.3884	4.54772	4.09412	4.11815	3.88964	4.55947	4.50857	4.35454
Zbtb32	ENSMUSG00000006310	0.733018	0.679057	0.897347	0.0528065	0	0	0.666301	0.486652	1.03311	0.0700848	0	0	0.744596	0.378689	0.516758	0.0703297	0.0927138	0	0.514162	0.663808	0.830628	0.0216423	0.104119	0.0529762	0.497495	0.548554	0.765704	0.0943927	0	0.0406931	0.62186	0.559657	0.606207	0	0.0984527	0	0.803894	0.878096	0.68317	0.705955	0.856184	0.924329	0.115193	0.0492268	0.0396711	0.950551	0.802302	1.01456
Upk1a	ENSMUSG00000006313	1.05767	0.971705	1.20382	0.774912	0.293679	0.407286	0.872479	1.04649	0.59699	0.532892	0.358477	0.613841	1.04145	0.765648	0.980832	0.678144	0.419551	0.818824	0.813499	1.16023	1.58749	0.578165	0.485886	0.366973	0.670091	0.624507	0.696449	0.579575	0.615729	0.403926	0.817223	0.833575	1.04791	0.488389	0.439904	0.462512	0.91039	0.683058	0.862899	0.636463	0.759435	0.701779	0.816555	0.415241	0.682728	0.654651	0.398221	0.810783
Susd2	ENSMUSG00000006342	0.882071	0.906177	0.824951	0.651521	0.845511	0.588816	1.15331	0.793725	0.807132	0.75218	0.546991	0.525594	1.12866	1.29048	1.2815	0.486144	0.802489	0.775823	1.59545	1.66722	1.79021	0.954345	1.02229	0.592266	1.44953	1.43728	1.49762	0.654404	0.594777	0.660922	1.54833	1.48714	1.39773	0.538923	0.547244	0.547984	0.99266	0.97446	0.863199	1.17863	1.18542	1.3104	1.22425	1.32155	1.48339	1.38818	1.53495	1.61593
Ggt5	ENSMUSG00000006344	0.749653	0.852034	0.604258	0.0787776	0.0531207	0	2.14029	2.47371	1.56811	0.059498	0.107472	0.369896	2.32292	1.8555	1.7501	0.760551	0.199152	0.0793763	1.04014	1.29393	1.06197	0.0520998	0.00855847	0.240764	2.49106	2.03109	1.63623	0.386935	0.143835	0.146673	1.56835	1.87863	1.97726	0.0173005	0.075205	0.0758103	1.43522	1.25597	1.24634	0.790232	1.37265	1.16702	0.24593	0.428644	0.327071	2.30303	1.66816	1.54582
Ggt1	ENSMUSG00000006345	2.81948	2.59648	3.01322	0.416828	0.631935	0.874775	3.79287	3.47751	3.63989	0.644085	0.310668	0.517573	3.85619	3.97748	3.96541	0	0.520384	0.820121	2.42862	2.62579	3.36273	0.434018	0.41044	0.438382	1.39621	1.617	2.11044	0.245353	0.451809	0.325902	1.58849	1.77095	2.0952	0.328049	0.197163	0.317173	0.953552	0.70424	0.821233	2.0722	1.99946	1.90243	0.65229	0.794857	0.661839	2.10418	1.76554	1.75766
Crip2	ENSMUSG00000006356	5.07451	4.97984	4.98087	5.11098	5.01023	4.88591	5.50069	5.18843	5.0482	4.66472	4.46474	4.44228	5.21187	5.15485	5.26737	4.71764	4.65033	4.56303	3.33617	3.44116	3.74872	4.67478	4.89502	4.61019	3.72595	3.76866	3.69426	5.00918	4.77341	4.81324	3.60331	3.82498	3.73018	4.80297	4.53232	4.65574	5.71311	5.6648	5.47828	3.18798	3.37412	3.12314	4.50979	4.76285	4.78029	3.17561	3.27199	3.38969
Crip1	ENSMUSG00000006360	5.19763	4.91532	4.89988	4.5616	5.39116	4.86032	4.49103	4.09446	4.19447	3.87062	4.27782	4.21325	4.24433	3.99945	4.01943	4.66551	4.01383	4.13491	3.31373	3.03311	3.73571	5.10468	5.05414	4.60142	3.18144	3.70402	3.60837	5.10531	4.65719	4.85638	2.43119	2.7619	3.04258	5.46542	5.1076	5.373	5.38878	5.24371	5.1112	1.18349	1.73892	1.9585	5.5525	5.55798	5.83822	2.77748	2.48349	2.1698
Cbfa2t3	ENSMUSG00000006362	1.34111	1.2765	1.24169	2.35811	2.0129	2.48541	0.362719	0.305427	0.263621	1.28128	1.23493	1.44276	0.218114	0.204908	0.074453	0.791007	1.30192	1.34041	0.141922	0.164302	0.196754	2.29394	2.37494	2.39084	0.16107	0.237586	0.135249	2.31723	2.15009	2.18685	0.152256	0.286977	0.184538	1.72144	1.91424	1.43788	2.05408	2.20391	1.9506	0.230867	0.166994	0.254696	2.366	2.40011	2.47806	0.0797683	0.115511	0.287538
Fbln1	ENSMUSG00000006369	6.25814	6.14071	6.08292	6.86378	6.72944	6.72705	6.86767	6.64857	6.33092	7.08481	6.93258	6.90358	6.35361	6.27486	6.37379	6.92645	6.82172	6.76754	6.76248	6.66349	6.79447	7.23844	7.32636	7.09262	6.87681	7.00952	6.80018	7.58643	7.37101	7.40282	6.97662	6.9854	6.85348	7.49176	7.46577	7.50145	6.0506	6.17001	6.0486	6.87191	7.02291	7.094	6.74452	6.80698	6.96442	6.73175	6.78419	6.98622
Gcat	ENSMUSG00000006378	5.93402	5.76082	5.75546	4.98783	4.97301	4.9548	6.25929	5.97968	5.73007	5.46307	5.4287	5.26967	5.74661	5.66083	5.83813	5.43361	5.26208	5.17208	6.10847	5.99769	6.1521	5.25799	5.4495	5.21218	6.27665	6.11398	6.0264	5.6786	5.58227	5.63825	6.26901	6.21391	6.22248	5.5913	5.42404	5.69268	6.08492	6.03501	5.94224	5.87145	5.84196	5.87313	4.66996	4.76557	4.60971	6.01805	6.00878	5.91556
Tek	ENSMUSG00000006386	0.303659	0.242374	0.422411	3.20576	2.94866	3.43108	1.08973	0.950668	1.16905	2.94556	3.08505	3.08241	1.61759	1.30351	1.42536	3.50089	3.40066	3.4452	0.456315	0.38262	0.488042	2.9797	3.07533	2.67078	0.375404	0.747699	0.523733	3.19914	3.01873	2.85987	0.473371	0.698434	0.794994	3.28023	3.22343	2.89678	0.620458	0.551416	0.288212	0.173626	0.287858	0.186151	3.16796	3.14894	3.06481	0.0980387	0.0761103	0.0934385
Mpl	ENSMUSG00000006389	0.0570543	0.0216995	0.0333132	1.08646	0.685193	0.885196	0	0.0248028	0.0368107	0.555473	0.431594	0.543644	0	0	0.0117072	0.387924	0.605711	0.719557	0.0604024	0	0.0241127	1.02085	1.00583	0.946833	0.0176326	0	0.0549283	1.07179	0.978995	0.967943	0.0197132	0.0529321	0.0240182	0.982481	1.0797	0.805961	0.115722	0.141403	0.0874334	0.0349655	0.0117043	0	0.723898	0.566713	0.636906	0.0126112	0.0234342	0.0269075
Hyi	ENSMUSG00000006395	2.18136	2.03419	2.07726	2.45921	2.37663	2.36693	2.2698	2.48152	2.05581	2.43113	2.33206	2.28976	2.33869	2.54383	2.4884	2.07762	2.38328	2.43308	2.21017	2.32524	2.4309	2.79548	3.06168	2.87497	2.61265	2.70055	2.65194	3.18317	2.91607	3.10438	1.99167	2.25964	2.32998	3.27101	2.71682	2.93646	2.16807	2.06556	2.06845	2.50965	2.97294	2.66167	3.35368	3.45343	3.60796	2.76091	2.72183	3.08065
Cdc20	ENSMUSG00000006398	7.43217	7.43147	7.35332	7.53234	7.62163	7.45138	7.2089	7.03147	6.75158	7.4244	7.35545	7.23557	6.97177	6.99931	6.87395	7.57398	7.39809	7.24784	6.99378	7.05771	7.10077	7.53091	7.71904	7.626	7.02946	7.08667	6.98841	7.41099	7.52033	7.50209	7.11248	7.1533	7.13617	7.75769	7.70329	7.73922	7.4596	7.48582	7.42005	6.52349	6.75105	6.69119	6.72063	6.96732	6.82089	6.81483	6.94532	7.04033
Adamts4	ENSMUSG00000006403	1.63345	1.62882	1.77699	2.86184	1.92724	2.77909	0.808714	0.676988	0.716541	2.44446	2.62133	2.53047	1.42494	1.37452	1.37202	3.1091	2.79959	2.79805	1.49812	1.36802	1.45766	3.30462	3.06593	2.90973	0.919976	1.03034	0.931301	3.12391	2.77922	2.83359	1.46513	1.34954	1.38582	3.45544	3.36494	3.31571	1.53464	1.48615	1.4475	1.0112	1.1443	1.12433	3.72681	3.73206	3.78082	0.820426	0.811714	0.787407
Pvrl4	ENSMUSG00000006411	3.66717	3.38837	3.53043	0.0490307	0.130547	0.0861861	4.38374	4.35138	4.11692	0.0638054	0.108279	0.128083	4.57001	4.5626	4.5914	0.186019	0.20046	0.0832405	6.60885	6.66219	6.72891	0.0344098	0.100972	0.100399	6.21072	6.11397	6.06918	0.0987569	0.114599	0.14741	6.13262	6.11521	6.07761	0.0597178	0.0888472	0.104984	4.35058	4.30198	4.25964	6.45457	6.35247	6.39154	0.407886	0.28709	0.286306	6.37778	6.39859	6.34217
Pfdn2	ENSMUSG00000006412	7.66085	7.90264	7.79314	7.90024	7.76557	7.83034	7.76581	7.81261	7.71305	7.81773	7.85122	7.83546	7.76787	7.75876	7.80831	7.99569	7.82593	7.95356	7.05045	6.99848	7.08866	6.84439	6.89985	6.73278	7.0504	6.90892	7.00011	6.94831	6.8472	6.89346	7.07105	7.0909	7.07636	6.93038	6.87703	6.89341	7.20217	7.04771	6.96788	7.21065	7.18904	7.23063	7.04873	6.8623	7.15728	7.18119	7.17534	7.1742
Neurl1a	ENSMUSG00000006435	1.9996	1.69169	1.89941	1.67015	1.41182	1.48113	1.69683	1.69656	1.41333	1.61783	1.70069	1.63268	1.63156	1.69428	1.65416	1.47149	1.49652	1.43598	2.01755	1.99378	1.87804	2.31031	2.48247	2.20914	1.83646	1.88691	1.96873	2.36937	2.27823	2.36209	1.97621	2.1003	2.05963	2.13609	2.04962	2.01014	2.84218	2.83136	2.77888	2.41236	2.42448	2.37724	2.51118	2.40379	2.49821	2.05586	2.02701	2.24251
Srm	ENSMUSG00000006442	6.89464	6.80881	6.79289	7.42924	7.73716	7.43225	7.00446	6.84785	6.60822	7.5221	7.4377	7.43123	6.3939	6.45346	6.53138	7.55147	7.58225	7.55257	6.38847	6.15061	6.40877	6.61811	6.81894	6.67844	6.67036	6.56424	6.38299	7.13151	6.84094	7.05788	6.61866	6.55166	6.50627	6.88445	6.56944	6.79196	6.62959	6.60608	6.58381	6.40971	6.6063	6.4085	6.5219	6.71125	6.65447	6.61743	6.57409	6.53756
Epha2	ENSMUSG00000006445	3.5959	3.51103	3.47146	2.22827	1.82422	2.2679	4.12985	3.99783	3.67378	1.80934	1.69431	1.67972	4.30165	4.37975	4.4263	1.84431	1.93872	1.64139	3.92883	3.60147	4.46475	2.32025	2.2413	2.14802	3.42599	3.33493	3.3463	2.40102	2.08861	2.10827	3.9606	3.93217	4.17745	2.02845	1.98369	1.81779	3.01289	3.13631	3.18484	4.4722	4.16869	4.52022	2.45915	2.38532	2.30688	3.63775	3.50626	3.54147
Actn3	ENSMUSG00000006457	1.55135	1.38524	1.41288	1.0837	0.937923	0.986262	0.539952	0.298803	0.274307	1.38003	0.915326	1.02453	0.6469	0.640236	0.661947	2.31024	1.4562	1.36287	0.755312	0.675948	0.773818	1.48927	1.57761	1.59848	0.549484	0.603915	0.501782	2.3674	1.95098	1.51449	0.918193	0.794446	0.846954	1.06928	0.899826	0.932532	0.883668	0.954115	0.89326	0.815153	0.942927	1.0875	1.32415	1.46537	1.63001	0.470714	0.686073	0.469172
Zdhhc24	ENSMUSG00000006463	3.20997	3.34911	3.36557	2.49087	2.30828	2.18598	2.7808	3.02085	2.9894	2.43138	2.54404	2.54749	2.90312	3.09446	3.21107	1.88747	2.56395	2.64742	3.33798	3.32451	3.34754	2.6221	2.73223	2.33124	3.33758	3.22504	3.19318	3.02781	2.81093	2.75144	3.41065	3.35143	3.28329	2.58473	2.55932	2.59901	3.78753	3.75836	3.69338	3.49893	3.43865	3.74455	2.84486	2.93971	2.93299	3.5445	3.33834	3.55256
Nsmf	ENSMUSG00000006476	5.33927	5.20124	5.30342	5.14221	5.15384	5.09252	5.26778	5.08466	5.04325	5.18812	5.1839	5.22381	5.07977	5.22705	5.19379	5.35681	5.0621	5.40094	4.76936	4.8002	4.81354	5.71379	5.62593	5.49197	4.89179	4.81308	4.96367	5.33245	5.23051	5.38432	4.78745	4.92047	4.89349	5.50754	5.40955	5.44741	5.58021	5.42565	5.41692	4.75019	4.8189	4.75851	5.9683	6.00807	5.98314	5.04236	4.69322	4.86366
Pdk1	ENSMUSG00000006494	6.26543	6.35955	6.31503	5.25205	4.66334	5.56987	6.59483	6.69711	6.80501	5.54783	5.87168	5.72818	6.68061	6.7461	6.58091	5.81188	5.8293	5.99766	6.3707	6.41489	6.50624	4.86552	4.91544	4.90627	6.63641	6.67676	6.60774	4.86952	4.7433	4.94199	6.65706	6.69604	6.73268	4.58536	4.75226	4.87657	6.19215	6.29261	6.13336	6.44677	6.32401	6.13975	5.13143	5.07563	4.66988	6.57301	6.60677	6.28859
Mvd	ENSMUSG00000006517	5.41725	5.24798	5.2521	4.98021	5.21475	5.01209	5.62692	5.38164	5.09447	5.34957	5.39034	5.15939	5.00924	5.12061	5.1139	5.33438	5.29673	5.16408	4.66802	4.51412	4.71902	5.17041	5.22122	5.26613	4.73533	4.74749	4.77112	5.47054	5.15312	5.34276	4.65333	4.66742	4.80542	5.5259	5.29537	5.41805	5.35647	5.3182	5.28261	4.28148	4.31293	4.34397	4.71222	4.85133	4.80459	4.72831	4.61026	4.65755
Cyba	ENSMUSG00000006519	4.87039	4.6421	4.50773	4.72748	4.58071	4.41308	5.01334	4.56018	4.36255	3.98196	3.83997	3.75181	4.80857	4.66076	4.81445	3.83328	3.83073	3.70767	4.78518	4.68844	4.95404	4.95296	5.0293	4.75404	4.93673	4.81106	4.84256	4.7346	4.57569	4.63908	5.08322	5.11426	4.98846	4.71969	4.46851	4.58292	5.14668	4.99741	5.08099	4.92337	4.98013	5.04417	4.85359	5.00948	5.01439	4.84799	4.85001	4.92834
Sfmbt1	ENSMUSG00000006527	4.00975	4.09799	4.05783	4.13865	3.5132	4.04231	3.45917	3.48179	3.52207	3.89816	4.06223	3.95008	3.55786	3.47892	3.36194	4.05644	4.03861	4.05139	3.14511	3.04665	3.10232	4.08433	4.09796	3.87965	3.36296	3.33065	3.22271	4.02024	3.81316	3.90239	3.33795	3.31553	3.38723	3.91015	4.01036	3.9584	4.15513	4.11948	3.99047	3.08589	2.80547	2.9382	3.92345	3.89959	3.80694	3.19047	3.09031	2.88979
Ihh	ENSMUSG00000006538	0.0684181	0.22793	0.141084	0.063742	0.196764	0.0646926	0.154193	0.0734948	0.0740535	0.127464	0.140824	0.151043	0.0917732	0.197196	0.0690955	0	0.160354	0.046796	0.141488	0.126242	0.210375	0.116522	0.149609	0.121244	0.111206	0.0926482	0.0820031	0.0988965	0.198803	0.124126	0.161815	0.168547	0.166547	0.0771794	0.100659	0.121219	0.0429106	0.091104	0.0791364	0.0960772	0.121997	0.125973	0.278304	0.216903	0.224555	0.102912	0.0828643	0.110092
Atp7b	ENSMUSG00000006567	1.51194	1.45788	1.48567	1.19525	0.785882	1.22893	1.66945	1.578	1.57833	0.825852	0.872934	0.752808	1.83425	1.8562	1.85772	0.747192	0.776368	0.778262	0.810288	0.745094	0.807025	1.21443	1.22943	1.14271	1.05876	1.2155	1.09548	0.855486	0.8279	0.856227	1.17772	1.13042	1.2033	0.901921	1.06563	0.970092	2.11448	2.18046	2.0813	0.511451	0.851091	0.805688	0.976408	0.882706	0.843411	0.714608	0.666032	0.869049
Slc4a1	ENSMUSG00000006574	0.480194	0.39663	0.431001	5.08809	4.71198	5.36254	0.407788	0.367037	0.418898	4.11907	4.17084	4.50024	0.536691	0.445695	1.24746	4.09022	4.15282	4.43131	0.828148	0.350492	0.355699	5.22785	4.8186	4.0416	0.661635	0.744923	0.688399	5.12072	4.75072	4.18494	0.734776	0.694369	0.835771	5.02287	4.73307	4.18198	1.84721	1.69317	1.17743	0.586847	0.508249	0.83282	4.29241	3.91759	3.67308	0.95937	0.515866	0.321952
Rundc3a	ENSMUSG00000006575	4.16528	4.16236	4.17358	2.02582	1.47213	1.81172	1.38332	1.29653	1.08319	1.05086	1.06594	0.887186	1.43807	1.0075	1.32268	1.35522	1.80043	1.37437	1.04585	1.18864	1.66919	1.68565	1.69806	1.75105	1.10939	1.36942	1.20247	1.51979	1.27561	1.42108	1.36782	1.309	1.32408	1.56397	1.14827	1.17502	5.34628	5.22502	5.04355	1.12491	1.24399	1.19564	2.25613	2.80087	2.28722	1.01956	1.11829	1.36377
Slc4a3	ENSMUSG00000006576	4.0904	3.89014	4.03779	3.85935	2.93782	3.77488	4.57843	4.46141	4.26783	3.4333	3.4577	3.29817	4.39785	4.50965	4.6603	3.76114	3.58428	3.26106	4.53124	4.44007	4.59825	4.25083	4.16181	4.06893	4.64794	4.51931	4.55499	4.21388	4.12509	4.09144	4.52636	4.78316	4.64809	4.23435	4.15219	3.83523	4.11735	4.11471	4.10373	4.99578	4.97472	5.05666	4.57104	4.40605	4.45094	5.29407	4.90042	5.20113
Runx1t1	ENSMUSG00000006586	2.35346	2.61814	2.29883	4.73294	3.67559	4.4902	1.13642	1.11211	1.18958	4.79377	4.62855	4.46217	0.563765	0.279797	1.05913	3.43686	3.83682	3.61737	1.05952	1.07903	0.639482	4.92774	4.80882	4.60517	0.54915	1.25746	0.606582	5.01422	4.66267	4.67195	0.325006	0.313541	0.219397	4.33407	4.41568	4.28859	2.40728	2.41328	1.88215	0.284691	0.613782	0.304495	5.45979	5.10065	5.06847	0.61713	0.715518	0.650391
Snai3	ENSMUSG00000006587	1.77496	1.88746	1.90318	0	0	0.103741	1.32924	1.13212	1.12429	0	0	0	1.22815	0.926213	1.21481	0	0.022758	0	0.697429	0.787501	0.97445	0	0	0.0993395	1.2542	1.05751	1.18724	0	0	0	1.09033	1.14552	1.1474	0	0	0	2.2219	2.30333	2.20604	1.04643	1.02286	0.86989	0.10618	0.115855	0.0193378	1.20022	1.05942	0.882366
Aprt	ENSMUSG00000006589	7.48236	7.14096	7.22147	7.2985	7.72999	7.32453	8.26369	7.91928	7.75297	7.35136	7.15682	7.25635	7.51776	7.55625	7.57756	7.56209	7.22083	7.16283	7.51359	7.32298	7.59988	7.24627	7.46091	7.33043	7.91586	7.73257	7.83181	7.42666	7.28077	7.35759	7.75748	7.72466	7.71321	7.30839	7.03286	7.22205	7.44769	7.39643	7.36212	7.53076	7.55113	7.63049	7.06726	7.24123	7.23003	7.76728	7.69211	7.73892
Hfe	ENSMUSG00000006611	0.845996	0.821077	0.501669	1.45103	1.17859	1.33931	0.390147	0.380099	0.407793	1.21868	1.38298	1.46017	0.524758	0.784532	0.443292	0.97076	1.38542	1.93011	0.597017	0.584517	0.540914	1.63351	1.74272	1.45245	0.39461	0.578313	0.921087	1.83593	1.85125	1.85912	0.521538	0.435783	0.643656	1.98108	1.67076	1.74077	1.18695	0.930606	0.919133	0.772902	0.78896	1.06204	1.78298	1.78215	1.91749	0.525344	0.674498	0.764223
Abhd1	ENSMUSG00000006638	0.84907	1.10468	0.980101	0.566793	1.13715	0.688555	0.99725	1.03493	1.10813	0.507631	0.616727	0.448997	1.15497	1.0003	1.12865	1.13565	0.620579	0.426121	0.707657	0.66491	0.966569	0.936105	0.923587	0.9547	1.08365	1.08234	0.960669	0.694155	0.716031	0.965976	1.10221	1.12143	1.03922	0.563906	0.600608	1.06196	1.08861	0.979711	1.07344	1.23765	1.26129	1.31933	1.23879	1.00983	0.919896	1.46523	1.1906	1.21984
Aplp1	ENSMUSG00000006651	4.34414	4.17522	4.20877	2.5369	2.26024	2.43669	2.46176	2.43667	1.93892	2.41951	2.17483	2.14962	2.84066	2.74766	2.96768	2.41907	2.14947	2.02146	4.27862	4.18417	4.2293	4.35691	4.40044	4.13411	3.54179	3.55944	3.49401	3.92334	3.86881	3.70879	3.80955	3.88475	3.61194	4.53276	4.20603	4.3513	5.87955	5.82238	5.68129	4.06124	4.10097	3.96828	5.17548	5.27286	5.28492	3.70272	3.69688	3.86284
P4htm	ENSMUSG00000006675	2.85967	2.69151	2.91507	1.9365	1.51955	1.904	2.37803	2.30581	1.67592	1.11009	1.22386	1.19996	2.41051	2.21177	2.03745	1.63408	1.23352	1.22206	1.85063	1.91775	2.2143	2.59521	2.5733	2.28015	1.8104	1.9182	2.06302	2.1048	2.14366	2.18691	1.84962	2.06565	1.89265	2.38438	2.2558	2.44447	3.16929	3.02758	3.06893	1.74442	1.78199	2.18852	2.75093	2.8924	2.9196	1.95273	1.96437	1.81076
Pknox1	ENSMUSG00000006705	4.06178	3.98024	4.05136	3.27104	2.71292	3.22305	4.00152	3.99987	3.83618	3.89455	3.78863	3.83864	3.69598	3.73152	3.79928	3.51705	3.68736	3.6872	4.0607	4.13801	4.07998	3.96149	4.03407	3.68187	4.33198	4.37166	4.14633	4.33752	4.10694	4.22013	4.28621	4.20333	4.20505	4.18001	4.28551	4.20859	4.4578	4.36931	4.28299	4.1735	4.13147	4.11712	3.76957	3.92839	3.75011	4.19342	4.23533	4.21637
D130043K22Rik	ENSMUSG00000006711	0.490677	0.278861	0.232128	0.120535	0	0.0486392	0.136399	0.0835739	0.0690199	0.0417581	0.0326796	0	0.0349938	0.0993336	0.105742	0	0.0350373	0.114321	0.0936709	0.072677	0.0706435	0.0806166	0.0309126	0.0862075	0.0297098	0.0405415	0.00842949	0.029494	0.0732592	0.0692509	0.0134277	0.105316	0.0242949	0.0601537	0.0989742	0.0464339	1.09862	0.985027	0.837521	0.0578761	0.050664	0.0519162	0.112414	0.214907	0.116476	0.186992	0.0867978	0.058713
Gmnn	ENSMUSG00000006715	6.6354	6.72781	6.64051	7.09011	7.41862	7.19992	6.7788	6.69246	6.97884	6.99647	7.15017	7.04486	6.52285	6.62163	6.4303	7.24741	7.1234	7.31028	6.52766	6.4002	6.63192	6.53486	6.72387	6.64045	6.52117	6.55786	6.58402	6.5109	6.47586	6.59714	6.68277	6.59815	6.72928	6.71082	6.47346	6.6708	6.54173	6.51945	6.4913	6.07902	6.07046	6.03807	5.67328	5.69623	5.65391	6.22596	6.11761	6.10966
B4galnt1	ENSMUSG00000006731	2.93259	2.64745	2.68511	2.09743	2.0229	2.19184	2.00261	1.92911	1.89678	1.35049	1.28632	1.29764	2.4454	2.45031	2.46093	2.0226	1.63261	1.67046	3.04428	3.14464	3.26283	2.28796	2.29004	2.02865	2.29769	2.33114	2.32917	1.78238	1.49569	1.60979	2.74088	2.66686	2.62996	2.01115	1.64801	1.83756	2.42468	2.44055	2.41523	3.47656	3.3904	3.42758	2.93585	2.79323	3.02797	2.92542	2.93032	3.00695
Krt23	ENSMUSG00000006777	1.80082	1.57578	1.81796	0	0	0	0	0	0	0.205388	0	0.0471166	0.0878613	0.072918	0.0459801	0	0	0	0.118324	0.203566	0.222448	0	0	0.0259228	0.0237267	0.0262162	0.027714	0	0	0	0.164705	0.078702	0.198661	0.0260242	0.0244194	0.0513142	3.13868	3.10314	3.02432	0.632183	0.554174	0.637995	0.390375	0.561985	0.302562	0.353764	0.707018	0.708486
Cnp	ENSMUSG00000006782	3.53005	3.32366	3.41767	3.16473	3.47519	3.37459	3.59658	3.4567	3.29528	3.28925	3.0048	3.18538	3.69943	3.59809	3.56652	3.4938	3.25764	2.94333	3.42134	3.51005	3.56548	4.0377	4.06349	3.891	3.63302	3.68496	3.57948	4.16828	3.89308	4.0385	3.55054	3.53897	3.60413	4.4528	4.28796	4.33216	4.10662	4.09336	3.98561	2.86013	3.08595	3.03659	3.94862	4.16745	4.12639	2.81214	3.06843	2.98125
Ttc25	ENSMUSG00000006784	1.23288	1.29365	1.33358	0.842036	0.986145	1.20096	1.66696	1.37473	1.51769	1.20733	1.23605	1.31553	1.6332	1.83438	1.58629	2.17337	0.728556	0.857668	0.724382	0.641266	0.523956	0.722352	0.898106	0.864576	0.827788	0.82747	0.98015	0.610427	0.564217	0.995026	0.716702	1.07196	1.00431	0.507159	0.696954	0.841528	1.32678	1.15219	1.19058	0.843569	0.786963	1.02948	0.539299	0.781613	0.774415	0.872807	0.727834	0.78973
Sulf2	ENSMUSG00000006800	6.32085	6.45306	6.3619	7.71239	7.57592	7.52581	6.79891	6.75204	6.49294	7.7919	7.73318	7.66233	6.60669	6.65396	6.65687	7.57492	7.64178	7.60246	6.78699	6.79957	6.81604	7.89028	7.91762	7.69497	6.53395	6.5995	6.42216	7.83105	7.70077	7.6654	6.33329	6.37857	6.24246	7.94874	7.98226	7.91195	5.7326	5.8472	5.69586	6.70559	6.79739	6.83962	8.02682	8.05544	8.41999	6.4985	6.74361	6.81706
Stambp	ENSMUSG00000006906	3.58487	3.86794	3.6333	3.34723	3.46811	3.27705	3.5168	3.62568	3.60482	3.30429	3.31652	3.27806	3.57439	3.65521	3.61072	2.72605	3.17772	3.18565	3.90368	3.89349	3.9	3.70261	3.5645	3.42886	3.78095	3.79391	3.71891	3.5443	3.46318	3.44282	3.72252	3.70991	3.74944	3.66346	3.4907	3.50593	3.93056	3.88738	3.80229	3.92849	3.86067	3.95707	4.05251	4.01986	4.19739	3.78624	3.96293	3.84279
Ezh1	ENSMUSG00000006920	2.95632	3.13458	2.97265	3.03038	2.41752	2.91371	3.19272	3.17009	3.1995	3.25505	2.95959	3.01817	3.06904	3.37701	3.2951	2.45708	2.65613	2.63503	3.14564	3.23362	3.20614	3.49151	3.32035	3.12251	3.54034	3.54357	3.43403	3.41259	3.4211	3.17822	3.38081	3.40938	3.22001	3.58005	3.2584	3.02189	3.11208	3.11322	3.14441	3.46986	3.53435	3.60745	3.68864	3.57734	3.66206	3.72081	3.36043	3.63477
Hap1	ENSMUSG00000006930	4.92401	4.92771	4.82225	1.45983	1.39227	1.57971	2.60958	2.52881	2.36325	0.945166	0.795306	0.594982	3.211	3.25639	3.29435	1.86439	0.748927	0.773278	3.19692	3.1459	3.10507	1.27125	1.06463	1.36281	2.56854	2.6015	2.52016	0.97933	0.804622	0.702879	3.06897	3.19286	3.14492	0.777172	0.669227	0.552715	5.47336	5.39922	5.37617	3.2382	3.38635	3.20684	1.69184	1.9686	1.64738	3.36571	3.09856	3.27135
Leprel4	ENSMUSG00000006931	4.337	4.01881	4.02855	3.83076	4.30038	4.0005	4.51661	4.03071	4.07161	4.58879	4.22954	4.31272	4.26336	4.36505	4.15784	4.35431	4.25164	4.10872	4.00838	3.91189	4.00098	4.48926	4.59012	4.39821	4.04481	4.45994	4.32373	4.8936	4.81545	4.85445	4.10641	4.2348	4.24534	4.57097	4.79601	4.69652	4.30835	4.30235	4.34447	3.46191	3.8273	3.55014	4.71737	5.02538	4.73532	4.13007	3.90492	4.09224
Ctnnb1	ENSMUSG00000006932	9.92405	9.90952	9.91457	9.6062	9.34425	9.60902	10.3004	10.2219	10.136	9.48994	9.46812	9.43462	10.0963	10.1175	10.0794	9.50253	9.56247	9.5252	10.351	10.3131	10.3063	10.0122	9.97464	9.79195	10.6374	10.562	10.5106	9.84731	9.66637	9.77749	10.7249	10.6541	10.6096	9.96802	9.97266	9.95353	10.1774	10.1704	10.0583	10.5257	10.454	10.5507	9.92931	9.9524	9.88205	10.3841	10.4658	10.3659
Klk4	ENSMUSG00000006948	0.430745	0.152895	0.168556	0	0	0	0.437758	0.338597	0.223347	0	0	0.0320999	0.280147	0.220913	0.180719	0	0	0	0.186646	0.411953	0.32786	0	0.034161	0	0.676467	0.516864	0.579537	0.296104	0.130791	0.180431	0.456666	0.4907	0.38085	0	0	0	0.908034	0.801238	0.802068	0.289582	0.263824	0.141629	0.0586506	0.094557	0.0261483	0.468083	0.394954	0.445999
Chrd	ENSMUSG00000006958	1.19523	1.14433	1.10766	0.778839	0.650306	0.66722	0.756065	0.736678	0.688353	1.08505	0.859112	0.899709	0.790237	0.717688	0.890449	0.96897	0.908788	0.790647	0.608983	0.646426	0.673783	1.73246	1.87774	1.65527	0.871183	0.996828	0.96156	1.90024	1.73445	1.7421	1.0424	1.10559	1.05047	1.9874	1.65835	1.70968	1.67953	1.67748	1.62493	0.667973	0.6477	0.636157	2.18969	2.31411	2.43119	0.667412	0.583823	0.585073
Syngr3	ENSMUSG00000007021	1.95519	1.77153	2.01803	2.13851	1.65121	1.98385	0.969619	0.717212	0.76726	1.31132	1.12985	1.48629	0.937415	0.924801	1.05735	1.39792	1.19729	1.43731	0.832436	0.705657	1.08338	2.56376	2.63263	2.38317	0.443415	0.595517	0.506391	1.93882	1.76821	1.83079	0.621876	0.632022	0.598609	2.09489	2.01602	2.04198	2.34805	2.21486	2.10011	0.726263	0.622655	0.609439	2.12414	2.15003	2.21762	0.648464	0.367381	0.399414
Msh5	ENSMUSG00000007035	1.30183	1.88785	1.32269	1.59678	1.31962	1.24799	1.27884	1.58235	1.5373	1.42437	1.17825	1.15665	1.40676	1.29666	1.33677	1.90336	1.41357	1.69939	1.05753	1.68733	0.946339	1.55704	1.38271	1.50295	1.32455	1.33917	1.2625	1.64853	1.46282	1.67447	1.17561	1.30177	1.28612	1.86156	1.61646	1.67502	1.49498	1.42507	1.48794	1.08653	1.2584	0.862728	1.08955	1.39813	1.27112	1.27265	1.3364	1.47039
Abhd16a	ENSMUSG00000007036	4.9793	4.80813	4.8177	4.59175	4.38279	4.45792	5.13009	4.9009	4.62943	4.49987	4.61047	4.32577	4.66222	4.69985	4.84178	4.5618	4.35372	4.36723	4.86835	4.87989	4.93269	5.22987	5.39416	5.10279	4.98077	5.19524	5.00468	5.0139	5.00148	5.0682	4.96623	5.0555	4.98886	5.19543	5.03811	5.15259	5.25542	5.2677	5.13831	4.7661	5.03581	4.72892	5.24943	5.67284	5.1692	5.06071	4.98295	5.17248
Neu1	ENSMUSG00000007038	4.02039	3.9313	3.8881	3.26742	3.14959	3.04323	3.81549	3.59357	3.41379	3.11741	3	2.93456	3.67773	3.60718	3.59791	3.2558	2.90597	2.8334	3.5043	3.46059	3.60928	3.18275	3.3262	3.1192	3.50407	3.45784	3.48178	3.28317	3.32814	3.37366	3.46269	3.52278	3.56468	3.29649	3.07062	3.22199	4.01988	3.95462	3.90083	3.69809	3.61022	3.72792	3.52669	3.62386	3.52594	3.6351	3.51782	3.53092
Ddah2	ENSMUSG00000007039	8.6545	8.25519	8.29345	8.30608	8.22518	8.22325	8.55066	8.17673	7.95064	8.44463	8.4625	8.32129	8.49075	8.61667	8.52799	8.70655	8.20141	8.25358	8.20211	8.04503	8.3198	8.58707	8.77922	8.4803	8.1902	8.15646	8.25091	8.52215	8.44237	8.60304	8.13973	8.20933	8.33031	8.75098	8.60238	8.8452	8.68999	8.66236	8.58489	7.59125	7.61681	7.71588	8.33628	8.29777	8.45006	7.8896	7.88335	7.89439
Lsm2	ENSMUSG00000007050	7.98938	7.9197	7.78649	8.3399	8.3049	8.29968	8.02145	7.97288	7.55672	8.29286	8.18096	8.17749	7.64536	7.44382	7.8953	8.23182	8.21407	8.34693	7.03332	7.01389	7.1057	7.0855	7.26359	7.18592	6.9979	7.19641	7.03014	7.14326	7.12875	7.27382	7.13247	7.09746	7.06644	7.26223	7.30232	7.3622	7.04	7.09145	7.05659	7.02088	7.01653	6.92463	6.90471	6.685	7.02896	6.83849	6.86953	6.97474
Atp1a2	ENSMUSG00000007097	0.316257	0.27826	0.291785	0.2915	0.279724	0.29481	0.465476	0.502225	0.224443	0.286661	0.400056	0.378637	0.434903	0.358801	0.621931	0.474244	0.525972	0.344693	0.16035	0.225686	0.106884	0.993868	0.905397	0.827991	0.270205	0.534145	0.279001	0.807174	0.774076	0.578076	0.397302	0.458479	0.316347	0.883907	0.849954	0.762009	0.525702	0.479191	0.474828	0.0842956	0.237932	0.151629	2.05412	2.09537	1.92012	0.210449	0.115476	0.187844
Casq1	ENSMUSG00000007122	0.531567	0.339394	0.407584	0.919338	1.02126	0.747002	0.163299	0.163702	0.340241	0.758994	1.09029	0.934582	0.311588	0.307338	0.388478	1.29751	1.26866	0.640725	0.122158	0.0460951	0.386628	0.92351	1.22566	0.654939	0.231811	0.250422	0.13295	1.35813	0.873171	1.23465	0.0877903	0.0655715	0.245931	0.670683	0.995927	0.887878	0.652081	0.64438	0.713228	0.149434	0.286413	0.140811	1.16277	1.38978	1.35397	0.235391	0.114715	0.13091
Stx1a	ENSMUSG00000007207	3.73106	3.50828	3.6614	3.04934	2.90878	3.23763	3.26868	3.23011	3.21437	2.78138	2.66039	2.94215	3.30505	3.3362	3.34593	3.02985	3.39718	2.83785	3.2436	3.13989	3.27432	3.74131	3.69264	3.39614	3.50457	3.38777	3.3039	3.36978	3.11148	3.19524	3.43259	3.39755	3.28438	3.65273	3.53209	3.45408	4.66205	4.61938	4.55926	3.39383	3.41439	3.40259	3.94297	3.99218	3.94345	3.90442	3.53154	3.80668
Zfp775	ENSMUSG00000007216	2.43975	2.38643	2.45165	2.44576	2.45496	2.36116	2.57081	2.65889	2.27435	2.67673	2.61579	2.51582	2.23252	2.31842	2.35511	2.61266	2.54189	2.48499	2.18283	2.13027	2.21143	2.93954	3.21932	2.90043	2.55029	2.46897	2.35219	3.06367	3.04546	3.10134	2.43442	2.4562	2.41603	3.25982	3.1248	3.1643	2.77802	2.9301	2.77882	1.98505	2.00514	1.79414	2.61669	2.74526	2.56868	2.3425	2.22654	2.11544
Dennd2c	ENSMUSG00000007379	1.20547	1.16035	1.00687	1.62527	1.54954	1.63213	1.9767	2.21618	1.7928	1.34752	1.25796	1.16641	2.33037	2.17888	2.0408	1.49738	1.24377	1.36653	4.917	5.02743	5.12781	2.79686	2.74956	2.55162	4.65422	4.70006	4.71564	2.44965	2.37808	2.2819	4.82723	4.8786	4.71987	2.46697	2.50134	2.53121	2.30802	2.19856	2.2865	4.82329	4.52549	4.55209	2.69942	2.46792	2.48343	4.79923	4.53782	4.48984
Mc5r	ENSMUSG00000007480	0.0409627	0.194641	0.0317111	0.146136	0.245201	0.217581	0	0	0	0.224063	0.116133	0.0682603	0.0650264	0	0	0	0.301372	0.338258	0.0353429	0	0	0.677157	0.672272	0.762585	0.103453	0.113606	0.0787012	0.599461	0.468001	0.309055	0.0628976	0	0	0.556944	0.753507	0.695923	0.0681872	0.180481	0.176007	0	0	0.0316649	1.19777	1.20875	1.01625	0	0.0344823	0.0396007
Tinf2	ENSMUSG00000007589	5.63303	5.76011	5.66171	5.54674	5.50333	5.52784	5.36716	5.41887	5.31388	5.5313	5.45169	5.37184	5.29867	5.29877	5.2651	5.46103	5.47343	5.34992	5.08854	4.9869	5.11975	5.09298	5.20522	5.10402	4.91046	4.8929	4.88388	5.0931	5.06954	5.18844	4.93154	5.04739	5.11823	5.2679	5.16741	5.26302	5.41798	5.34556	5.41835	4.64063	4.64779	4.62332	4.44233	4.42563	4.44263	4.65503	4.62961	4.59867
Tssk4	ENSMUSG00000007591	0.818413	0.81783	0.930294	0.688377	0.778989	0.562044	1.15569	1.01772	0.938643	0.6558	0.514145	0.526063	0.975663	1.26436	1.10349	0.445461	0.540189	0.56782	0.862482	0.97084	1.09802	0.857492	0.929533	0.761051	1.09167	0.926466	0.84758	0.844442	0.763184	0.921052	1.02386	1.01983	0.895968	0.807564	0.970737	0.878666	1.02293	1.05473	1.07843	0.967033	0.946735	1.08154	0.788907	0.612597	0.958186	1.02132	1.13908	1.25086
Tgfbr1	ENSMUSG00000007613	7.04558	7.07187	7.1326	6.91302	6.4376	6.98774	7.05466	7.16517	7.29597	6.79559	6.97431	6.83691	7.17234	7.22811	7.20074	6.74431	6.83116	6.98072	7.1622	7.15881	7.21835	6.9037	6.76803	6.63136	7.06868	7.08716	7.1838	6.81392	6.64614	6.79383	7.07276	7.09389	7.17374	6.55198	6.56228	6.60898	7.47083	7.42047	7.28728	6.51958	6.27407	6.2728	6.45652	6.36784	6.12748	6.34624	6.24576	6.09808
Gabrb2	ENSMUSG00000007653	0.400538	0.305969	0.238471	0.47798	0.0491986	0.49895	0.0356815	0.0700095	0.0190404	0.462658	0.73873	0.321419	0.264841	0.179474	0.292887	0.750688	0.878397	0.900995	0.990902	0.936521	1.00945	1.86698	1.44592	1.35125	0.227278	0.276364	0.39362	0.851709	0.790543	0.734485	0.952014	1.16705	1.15033	1.47687	1.55609	1.31072	0.378305	0.546562	0.404306	0.984428	0.712748	0.838163	1.80744	1.96521	1.52851	0.426099	0.500797	0.416476
Cav1	ENSMUSG00000007655	1.26703	1.20801	1.26201	2.74992	2.58261	2.93316	1.92955	2.14999	2.09183	2.77797	2.47452	2.74226	2.21771	2.2655	2.50514	2.3958	2.57275	2.8179	3.68868	3.63128	3.73985	3.89119	3.82878	3.29729	3.73646	3.6238	3.45738	3.80446	3.67455	3.4798	3.47983	3.44806	3.46155	3.6895	3.56521	3.36751	1.48191	1.23695	1.10127	5.05476	5.13857	5.02431	4.99815	5.03106	5.04422	4.98571	5.27521	5.05323
Bcl2l1	ENSMUSG00000007659	6.9735	6.97039	7.00101	5.98027	5.51412	5.83348	7.13219	7.0843	6.88902	6.00578	5.83323	5.81625	6.86609	6.85001	6.99661	5.85679	5.9334	5.82097	6.77621	6.6913	6.74184	6.24069	6.28623	6.15605	6.87502	6.7478	6.82395	6.19539	6.04642	6.1497	6.68325	6.61705	6.77343	6.30528	6.2786	6.34818	7.39979	7.37985	7.34799	6.73743	6.7066	6.77633	6.44452	6.39666	6.50663	6.54757	6.73975	6.64162
Dio2	ENSMUSG00000007682	0.174915	0.365475	0.197835	0.313677	0.165488	0.131253	0.0262943	0.0647369	0.153437	1.97948	1.86903	1.91513	0.0333181	0.0929202	0.0742731	0.302017	0.125757	0.160639	0.326407	0.22395	0.094794	0.733497	1.33977	1.09783	0.0755989	0.190655	0.105693	2.53719	2.45931	3.04864	0.153218	0.121513	0.253623	0.865559	0.681606	0.895272	0.489641	1.06932	0.696996	0.0901764	0.17636	0.167608	1.51882	1.56551	1.02279	0.624199	1.0463	0.498651
Ccdc124	ENSMUSG00000007721	7.07968	7.0326	7.0421	7.46064	7.74719	7.26403	7.01806	6.9403	6.74627	7.41636	7.18581	7.21884	6.93432	6.80893	6.859	7.39746	7.26163	7.16085	6.515	6.33775	6.54137	6.73147	6.99276	6.89829	6.37264	6.45809	6.46093	6.77182	6.78283	6.78007	6.51863	6.54276	6.54827	6.95978	6.72648	6.89506	6.66085	6.6033	6.64641	6.6747	6.76125	6.68966	6.67608	6.76309	6.82792	6.58082	6.4789	6.73377
Cpt1c	ENSMUSG00000007783	2.86064	2.80967	2.9232	2.53486	2.29344	2.47167	2.85716	2.46428	2.52832	2.77843	2.62919	2.59706	2.71034	2.69152	2.83501	2.79058	2.4605	2.29084	2.89121	2.69639	2.68876	3.57891	3.5019	3.29517	2.46336	2.62629	2.64165	3.61906	3.65739	3.34167	2.62348	2.71787	2.60422	3.63546	3.36956	3.30644	3.25744	3.19539	3.22167	2.99551	3.06228	3.13912	4.18976	4.21791	4.40639	2.76251	2.74751	2.74999
Twist2	ENSMUSG00000007805	0.669994	0.525566	0.685551	4.66945	5.00368	4.64822	1.53442	0.87961	1.40625	6.60748	6.43966	6.48723	1.11378	0.968504	1.15569	6.35427	6.34779	6.32764	0.32638	0.189303	0	5.44019	5.51559	5.38361	0.690137	1.61944	1.331	7.01558	6.69877	6.96587	0.465051	0.751116	0.390115	7.07056	6.72827	7.10701	0.319618	0.684393	0.566424	0.218832	0.979791	1.05832	6.79369	7.0918	6.82995	0.920031	0.343972	0.28026
Prrg2	ENSMUSG00000007837	5.41348	5.22373	5.20139	3.77914	3.67332	3.80836	4.95128	4.42875	4.29286	4.45697	4.31935	4.05139	4.88819	4.84991	5.00505	4.20552	3.87829	4.00621	4.1773	4.11419	4.17903	4.19327	4.34135	4.10877	4.33784	4.23622	4.45842	4.29283	4.09075	4.16921	4.32028	4.46685	4.38292	4.16123	4.04907	3.99969	4.89237	4.97087	5.03837	4.50068	4.4912	4.51854	4.50152	4.56248	4.61694	4.45936	4.44374	4.64802
Ift43	ENSMUSG00000007867	5.44242	5.33999	5.38595	4.55337	4.96856	4.82248	5.48275	5.34688	5.35295	4.47583	4.61298	4.47095	5.25228	5.44581	5.47531	4.96175	4.46343	4.59754	5.31799	5.26112	5.46082	4.97977	5.11592	4.73163	5.21199	5.23492	5.34603	4.97552	4.83568	4.82472	5.37233	5.32718	5.4589	5.2411	5.10112	5.17982	5.60663	5.55101	5.5175	5.30722	5.43323	5.34636	4.92282	5.03715	5.37771	4.95625	5.14292	5.21018
Id3	ENSMUSG00000007872	8.60518	8.25584	8.34334	8.11137	8.27408	8.16815	8.23939	7.98854	7.93803	7.9174	7.79644	7.78837	8.07756	8.09039	8.05783	8.11882	7.82809	7.8175	8.49247	8.4338	8.98384	8.94072	9.20654	8.89761	8.27513	8.37139	8.34649	8.02121	7.922	8.08055	8.52735	8.63015	8.71061	8.8521	8.56589	8.80206	8.58107	8.53503	8.52571	8.30721	8.17628	8.27401	8.38321	8.58952	8.45115	8.3051	8.00413	8.08747
Crlf1	ENSMUSG00000007888	5.61841	5.36032	5.29041	7.66202	7.48148	7.57167	3.84294	3.85607	3.99534	6.65803	6.47837	6.32179	3.16455	3.67709	3.64654	7.64142	7.55608	7.40922	3.02655	3.48082	3.18574	7.41094	7.6174	7.5263	4.77721	5.00413	4.51127	6.29486	6.16118	6.44952	3.50992	3.52216	3.92327	7.10456	7.17481	7.21291	5.92552	6.06331	6.04156	2.27821	2.3635	2.71728	6.3657	6.19295	6.4492	4.45348	4.05719	4.3178
Rplp1	ENSMUSG00000007892	12.3329	11.9922	12.1512	12.3968	12.9678	12.3848	12.1219	11.7438	11.6763	12.1811	11.79	12.0766	11.8881	11.7327	11.8197	12.499	12.2231	11.9927	11.8374	11.5346	11.7554	11.7634	12.0832	11.93	11.9277	11.7914	12.0249	11.792	11.8552	11.8806	11.9122	11.9343	11.8937	11.8594	11.5647	11.9316	11.9673	11.9294	11.9029	11.9517	11.9755	11.7767	11.6348	11.745	11.646	12.1663	12.1129	12.0231
Hmgcll1	ENSMUSG00000007908	2.85493	2.90592	2.94392	1.1178	1.35512	1.206	2.78757	2.56889	2.63513	1.28614	1.25811	1.4713	2.60136	2.70934	2.4316	1.15202	1.14721	1.12402	1.80645	1.65186	1.68511	1.65063	1.55024	1.28024	2.27019	2.12238	2.15803	1.71807	1.63283	1.6926	2.00218	1.88367	2.10528	1.73052	1.67483	1.48877	3.29231	3.31089	3.0964	1.66288	1.6413	1.571	1.51192	1.68569	1.56686	1.7732	1.6822	1.61302
Ttc9b	ENSMUSG00000007944	1.36611	1.2934	1.41238	0.32177	0.0498294	0.149309	0	0	0	0.0532287	0	0.0460905	0	0	0.0894702	0	0.128532	0.0991386	0.137484	0.197918	0.102813	0.138261	0.429041	0.36674	0	0	0	0.0466639	0.269611	0.0453018	0.123919	0	0.0517105	0.357344	0.21921	0.390862	3.13481	3.25868	2.98794	0	0.0454174	0.0420795	0.617932	0.72017	0.450539	0.0486212	0	0
Abhd8	ENSMUSG00000007950	5.41107	5.11224	5.19455	5.30248	5.28284	5.28143	4.88798	4.66816	4.34097	5.28836	5.08312	5.13678	4.82556	4.66975	4.83977	5.46023	5.11924	5.01454	4.97365	5.10911	5.21954	5.7969	5.97572	5.82307	5.06362	5.14465	4.91837	5.87578	5.89113	5.9251	5.23511	5.17869	5.16435	6.0475	5.88819	5.99915	5.61101	5.68114	5.64569	4.93583	5.08403	4.84779	5.60332	5.85207	5.4366	4.89975	4.75626	5.00457
Fzd3	ENSMUSG00000007989	5.3345	5.47525	5.47368	4.43365	3.3616	4.48723	4.56417	4.73625	4.82341	3.82479	4.01895	3.83555	4.8191	4.91648	4.90824	4.04036	4.28199	4.24005	5.82817	5.94138	5.53849	4.06977	3.99386	3.84143	5.09752	5.11121	4.90472	3.63668	3.56908	3.35289	5.16044	5.17336	5.00863	3.79733	4.21244	3.89269	5.29602	5.32227	5.08613	5.25609	4.95646	4.89634	3.60141	3.54182	2.89753	4.61959	4.65383	4.39906
1700008O03Rik	ENSMUSG00000008028	1.59229	1.25783	1.39632	0.305284	0.270588	0.505588	1.18611	0.855378	1.34247	0.370681	0.6476	0.548342	1.26333	1.2215	1.65575	0	0.280658	0.293064	1.18547	0.912446	1.1206	0.510445	0.141588	0.559447	0.712056	0.968462	0.861034	0.54243	0.564517	0.818226	0.934033	1.3634	0.88243	0.681399	0.419989	0.593339	1.2734	1.49745	1.38556	1.29763	1.23104	1.27119	0.499706	0.749832	0.707035	0.760754	0.813228	1.22351
Mid1ip1	ENSMUSG00000008035	5.8928	5.63878	5.70942	3.60339	2.89265	3.53056	4.93708	4.96974	4.63254	3.92971	4.16594	4.02325	4.99348	5.33719	5.24571	3.30619	3.67445	3.84019	4.59563	4.30961	4.371	3.55487	3.55632	3.19327	3.86715	3.80494	3.63565	4.53893	4.12446	4.25177	4.11072	4.27501	4.4754	4.11191	3.7991	3.97661	5.51527	5.62246	5.45358	4.24243	4.25439	4.30069	3.7505	3.82606	3.8297	4.32669	4.23185	4.11227
Fgfrl1	ENSMUSG00000008090	5.44372	5.37882	5.42139	4.48499	4.38865	4.41395	4.84729	4.73985	4.58928	5.8355	5.77137	5.69748	4.40716	4.33533	4.44173	5.29955	5.29006	5.29673	2.80512	2.72285	3.04335	4.946	4.91953	4.70533	4.15518	4.26727	4.08607	5.8482	5.6883	5.82659	3.43146	3.50397	3.72382	5.41218	5.35974	5.39532	5.80367	5.78259	5.76015	2.12291	2.59329	2.5063	5.17009	5.2333	5.25911	3.88331	3.49811	3.56359
4930432K21Rik	ENSMUSG00000008129	1.02635	0.75297	0.857838	1.23054	1.15734	1.04469	1.36923	1.19193	0.919116	1.46695	1.17082	0.931376	1.34336	1.35802	1.31113	0.98185	1.05311	0.848817	1.13007	1.20599	1.2146	1.43886	1.60949	1.36621	1.00837	1.1437	1.10296	1.31107	1.15075	1.35962	1.1451	1.10679	1.12157	1.42418	1.38336	1.44198	1.03879	1.09792	1.05551	1.08899	1.0369	1.10552	1.35067	1.39103	1.42572	1.02596	0.900451	1.01865
Fhl2	ENSMUSG00000008136	2.19887	1.9882	1.9747	2.64059	2.59571	2.70205	2.14057	2.07958	2.03601	2.77833	2.72696	3.07129	2.03457	1.92075	1.76549	2.09891	2.12738	2.37423	2.41447	2.31723	2.69431	3.51757	3.31753	3.264	3.01036	2.87495	3.01955	3.50155	3.31524	3.50929	2.43443	2.46223	2.55558	3.25815	2.99235	3.26483	2.16484	2.27975	2.39842	1.51735	1.94954	1.66341	2.98618	3.1545	2.88854	2.21261	2.17239	2.15547
Clstn3	ENSMUSG00000008153	3.41924	3.48169	3.37472	1.92914	1.93287	1.61333	2.56151	2.35486	2.16862	1.49635	1.70877	1.57243	2.96193	2.83118	2.82615	1.80488	1.6482	1.37798	3.12793	3.06029	3.14136	3.22339	3.11597	2.91451	2.93147	2.93476	2.96704	2.75376	2.471	2.42555	3.18775	3.18074	3.17545	2.68422	2.66417	2.64632	3.98669	4.02205	3.98834	2.82051	3.12261	3.33351	3.3998	3.55073	3.96655	2.89559	3.01146	3.31077
Fbxw9	ENSMUSG00000008167	4.07991	3.91805	4.04964	3.61924	3.66282	3.50989	4.18474	4.26538	3.92637	3.56601	3.3725	3.50762	4.08766	4.27487	4.12853	3.54003	3.29495	3.42104	4.54821	4.52595	4.6924	4.32716	4.32404	4.16149	4.58789	4.55564	4.5756	3.99769	3.87791	4.04123	4.62909	4.56439	4.67044	4.3005	4.27672	4.30515	4.57624	4.41592	4.47985	4.55952	4.628	4.60126	4.35901	4.45684	4.46148	4.65326	4.50487	4.67178
Spib	ENSMUSG00000008193	0.0749257	0.098552	0.0916866	0.200002	0.0559128	0.252435	0.119864	0.102144	0.0394794	0.139235	0.0425645	0.0863025	0.13546	0.0898975	0.0844844	0.193426	0.119048	0.0811096	0.228665	0.150985	0.0808489	0.0885049	0.0675586	0.0677643	0.36087	0.232115	0.180679	0.0254403	0.0702007	0.012588	0.163741	0.183386	0.158302	0.0546062	0.0386901	0.0544632	0.0252588	0.0913795	0.0236102	0.569601	0.617667	0.474705	0.0119176	0.025951	0.0519415	0.887976	1.16204	1.09735
Cers4	ENSMUSG00000008206	3.53262	3.6498	3.54444	1.74672	2.01018	1.81513	4.28468	4.34696	4.28311	1.72927	1.79496	1.57326	4.25609	4.19926	4.16775	1.5944	1.97371	1.58273	3.64632	3.68809	3.77009	2.19059	2.18492	2.29148	4.16789	4.2199	4.19755	1.98116	1.8979	2.17083	3.80369	3.98773	4.14859	2.08532	2.13492	1.9076	4.03538	3.99718	4.00014	3.64395	3.96666	3.96334	2.50566	2.44582	2.65316	4.33719	4.02868	4.18113
Tle1	ENSMUSG00000008305	6.26822	6.19686	6.19113	6.50729	6.16421	6.28209	5.41017	5.37074	5.30688	5.96099	5.94344	5.89426	5.3765	5.38135	5.41131	5.9188	5.68332	5.8677	5.24374	5.31046	5.22906	6.33306	6.49813	6.35421	4.93737	5.13137	4.95254	5.95105	5.91206	5.98504	5.09857	5.19229	5.15146	5.54099	5.50899	5.62427	6.48942	6.46248	6.40458	4.98132	5.14736	4.95091	6.19988	6.2485	6.13653	4.73878	4.69153	4.78087
Relt	ENSMUSG00000008318	1.48394	1.91726	1.70511	2.81736	2.18357	2.60689	1.06989	1.29686	1.4747	2.24939	1.89271	1.94931	1.11081	1.17324	1.08822	2.01671	2.66506	2.03313	1.24687	1.29053	1.55351	2.4827	2.45036	2.37839	1.35755	1.48584	0.953498	2.10716	2.05076	2.11859	1.27882	1.29464	1.37669	2.08921	1.86694	2.2604	1.43863	1.44706	1.56106	1.66391	1.72243	1.36584	1.92432	2.02955	1.6445	1.67796	1.4388	1.75446
Snrpb2	ENSMUSG00000008333	6.80275	7.11941	7.19853	7.45053	7.77041	7.76049	6.76362	6.96913	7.31669	7.42868	7.66184	7.71076	6.90664	7.06448	6.97731	7.5821	7.71223	7.92748	6.8408	6.63084	6.71787	7.23741	7.13735	7.07505	6.77581	6.67586	7.02835	7.29351	7.09165	7.31578	6.89506	6.76857	7.06391	7.27773	7.06597	7.44528	7.05593	7.02145	6.95744	6.74555	6.65567	6.69889	6.85949	6.8799	6.85353	6.87823	6.82087	6.63854
Sertad1	ENSMUSG00000008384	3.98454	3.49278	3.78366	3.96769	4.34902	3.7215	4.26674	3.86221	3.69764	4.06724	3.94712	3.85181	4.10752	3.87506	3.88418	4.34643	3.74586	3.79664	4.54772	4.46704	4.93504	4.60196	4.70021	4.26951	4.06085	4.18775	4.03195	4.60718	4.38565	4.5548	4.2847	4.29302	4.39418	4.80448	4.58633	4.76231	3.97352	3.8926	4.03671	4.57459	4.35437	4.39824	4.38832	4.43156	4.53295	4.09249	3.86259	3.8954
Carhsp1	ENSMUSG00000008393	6.50522	6.40841	6.50232	6.40885	6.47197	6.4153	6.77708	6.63992	6.58232	7.07623	6.84721	6.94565	6.56749	6.48908	6.56651	6.76409	6.76147	6.80146	6.20707	6.06358	6.22326	6.31862	6.46454	6.34315	6.71003	6.69911	6.69375	6.80267	6.79154	6.88428	6.51393	6.50298	6.59283	6.70238	6.61308	6.77229	6.72653	6.65729	6.64643	5.78877	5.80223	5.68313	5.80306	5.88781	5.92031	6.01009	6.0442	6.01773
Elk3	ENSMUSG00000008398	3.2473	3.35202	3.24198	5.72078	5.38092	5.53243	2.48173	2.4827	2.35266	5.70673	5.66789	5.66377	2.99564	3.03333	3.20404	5.61424	5.56012	5.6123	4.03739	3.74399	3.72015	6.08686	6.05085	5.93027	3.5245	3.58972	3.45068	6.1444	6.09926	6.07002	4.22673	4.05157	4.0648	5.87468	5.87246	5.76697	4.21449	4.25611	4.03336	4.26673	4.11444	4.29137	6.04812	6.04352	6.07637	3.82643	3.74167	3.5943
Fut1	ENSMUSG00000008461	0.896982	0.82906	0.775454	0	0	0	0.510712	0.407335	0.518202	0	0.0475723	0	0.48393	0.380606	0.497797	0	0.0136648	0	1.471	1.36202	1.04307	0	0	0	1.68237	1.45322	1.36838	0.0426794	0.0443898	0.0555196	1.12971	1.05972	1.04729	0.0748441	0.0285638	0	2.15545	1.9467	1.94068	1.94257	1.69602	1.56699	0.0775491	0.137527	0.0232321	2.20345	1.9604	1.99713
Elavl2	ENSMUSG00000008489	4.85688	5.11013	5.12023	2.44919	1.25386	2.46574	2.66282	2.85515	3.05107	3.10057	2.88145	2.73232	3.78782	3.66444	3.67111	2.8092	3.65486	2.88155	2.78066	2.67393	2.82965	2.70732	2.35963	2.27745	2.34503	2.17694	2.49897	2.4525	2.2614	2.42284	2.67935	2.93372	2.96226	2.63228	2.3544	2.6117	5.56559	5.3324	5.27811	2.0891	1.94281	1.93777	2.22759	2.4037	2.06623	1.81375	1.65013	1.47131
Pou2f2	ENSMUSG00000008496	1.15224	0.983144	1.0501	0.888568	0.672467	0.601072	0.0608588	0.0994214	0.0494449	0.696476	0.66309	0.462079	0.264721	0.1815	0.303868	1.07943	1.46258	1.2649	0.118303	0.207804	0.098302	0.767147	0.91507	0.756554	0.0472533	0.134057	0.112733	0.759867	0.940826	0.543685	0.0611288	0.0632927	0.158817	0.539611	0.822071	0.60633	1.00728	1.02663	1.09293	0.0875725	0.104561	0.0948436	0.726562	0.51207	0.447533	0.0302832	0.0990301	0.0588839
Mgst1	ENSMUSG00000008540	6.772	6.73007	6.78709	5.01545	5.42464	4.91977	7.24569	7.11973	7.15756	4.37694	4.45723	4.58213	7.44193	7.47937	7.47927	4.06766	4.0708	4.24951	6.93863	7.00521	7.25025	5.71467	5.67115	5.45093	6.66776	6.725	6.84775	4.75936	4.61338	4.73194	7.00259	6.95368	7.058	4.69518	4.62473	4.6917	6.71633	6.69417	6.62	6.74129	6.48149	6.53429	5.63809	5.63254	5.60666	6.42915	6.35163	6.23092
Nfib	ENSMUSG00000008575	3.34755	3.27571	3.34319	2.48403	2.18859	2.63837	2.53692	2.62112	2.69791	2.56205	2.51805	2.54765	2.5147	2.61976	2.69726	2.34687	2.08665	2.18976	4.0649	4.0889	3.90461	4.46339	4.04482	3.99764	4.1596	4.09733	4.05669	4.52393	4.13189	4.11968	4.19354	4.15019	4.09802	4.24403	4.21083	3.8645	4.6581	4.69081	4.56063	4.70321	4.68796	4.80454	5.25398	5.24884	5.39508	4.58549	4.31337	4.7144
Htr3b	ENSMUSG00000008590	0.0701211	0.16852	0.320785	3.46036	3.12459	3.56868	0.0207131	0.0605783	0.0155019	0.0337723	0.0333386	0.0581961	0.0279286	0.0457053	0.042905	0	0.0844464	0	0	0.0168163	0.0164441	1.83461	2.12874	2.00844	0.0293415	0.016266	0.0342099	0.0587778	0.0167197	0.0146944	0	0	0	0.0944195	0.0451097	0.168134	0.100637	0.168842	0.0941843	0	0	0.0267475	0.616035	0.773888	0.539528	0.0155412	0.0145028	0
Rab25	ENSMUSG00000008601	5.91391	5.82521	5.84926	0.298559	1.40212	0.746483	5.26778	5.06396	4.88624	0.199922	0.40983	0.251255	5.33685	5.34919	5.30101	0.0530988	0.633194	0.117339	5.50218	5.40853	5.46934	0.356183	0.2907	0.2753	5.19092	5.07782	5.00197	0.472144	0.156948	0.203685	5.02127	5.11889	5.12841	0.179961	0.409006	0.115716	6.17091	6.07596	6.07649	5.39042	5.41271	5.55696	0.900178	1.28136	0.729518	5.11501	5.25878	5.32584
Rbfox1	ENSMUSG00000008658	0.368135	0.453036	0.423848	0.541395	0.250433	0.335343	0.484515	0.196457	0.13385	0.802901	0.922549	0.984211	0.510393	0.428216	0.387078	0.558963	0.555392	0.350988	0.417769	0.393773	0.372443	0.509038	0.381892	0.387481	0.536873	0.560968	0.655799	0.933524	0.79495	0.734551	0.622717	0.526565	0.46926	0.471603	0.370006	0.318028	0.299168	0.373048	0.419953	0.68338	0.600678	0.638251	0.503359	0.488098	0.500923	0.51868	1.04932	0.840551
Gprc5b	ENSMUSG00000008734	4.93919	4.87764	4.99524	4.03812	3.51468	3.9128	5.52367	5.39938	5.31466	3.67847	3.59295	3.55934	5.45086	5.35716	5.49091	3.756	3.80099	3.71808	5.82214	5.79712	5.90128	4.26035	4.25372	4.17547	5.67386	5.59008	5.56603	3.87249	3.76791	3.79273	5.7331	5.70964	5.60802	4.00129	3.8894	3.94527	4.77898	4.78656	4.73835	5.42237	5.47765	5.54292	4.57771	4.56294	4.50137	5.18125	5.4737	5.35064
Acyp1	ENSMUSG00000008822	5.15454	4.89137	5.02126	4.65349	4.98312	4.4691	4.83891	4.96445	4.98224	4.58838	4.55169	4.56573	5.13595	5.12465	5.0543	4.75478	4.50705	4.40507	5.29859	5.18403	5.31811	4.64682	4.83727	4.71247	5.17942	5.29034	5.2648	4.67657	4.6288	4.88708	5.34889	5.16588	5.33055	4.66319	4.31327	4.5983	5.2743	5.34167	5.32198	5.31357	5.20236	5.24727	4.40894	4.34943	4.71739	5.08264	5.0419	5.06207
Cldn13	ENSMUSG00000008843	0	0.0732066	0.0676064	1.31544	1.09923	1.42791	0	0	0.0386498	1.26828	1.12211	1.35512	0.101952	0.112277	0.0359701	0.651825	1.02479	1.26676	0.0382312	0.0422379	0.0814994	2.1157	1.87372	1.50792	0.0369898	0	0.165795	2.0702	1.81033	1.46956	0.0667592	0.0417433	0.120302	1.85767	1.75512	1.38504	0.448456	0.283085	0.0344932	0.137942	0.104784	0.128972	1.14124	0.984037	0.87238	0.147649	0	0.0812818
Hdac5	ENSMUSG00000008855	4.90176	4.69334	4.74162	4.37592	3.88904	4.1941	4.67513	4.30685	4.12549	4.61578	4.34205	4.47385	4.49499	4.43374	4.72817	3.93158	4.01436	3.86405	5.17022	5.09828	5.04826	5.05101	5.16293	5.02576	5.08113	5.04982	4.99347	5.33155	5.31413	5.27063	5.13482	5.13513	4.9917	5.47661	5.34303	5.29213	5.66814	5.61467	5.63037	5.33909	5.40539	5.3335	5.39168	5.41987	5.43395	5.28928	5.25202	5.44737
Vdac3	ENSMUSG00000008892	6.44983	6.66789	6.63695	6.53942	6.85315	6.77173	6.44032	6.59045	6.70382	6.61892	6.76187	6.69932	6.40787	6.65066	6.40842	6.4276	6.68647	6.98747	6.40681	6.17386	6.37125	6.41261	6.48187	6.39929	6.32469	6.30054	6.31497	6.38142	6.37593	6.39826	6.63668	6.62663	6.76731	6.57163	6.3362	6.46133	6.8233	6.75241	6.68842	5.95985	5.97881	5.98305	5.65212	5.83646	5.79968	5.91031	6.03339	5.90875
Bmp7	ENSMUSG00000008999	5.5737	5.57657	5.60542	5.55824	5.06777	5.3684	6.82862	6.77951	6.52834	2.68936	2.6076	2.65941	6.5637	6.57161	6.69007	4.22365	4.12808	4.18202	6.39035	6.41769	6.52173	6.14254	6.19074	6.10201	6.74203	6.77731	6.70863	4.17529	4.06437	4.01129	6.84856	6.78257	6.75433	5.42874	5.38501	5.41228	5.16892	5.19883	5.20054	6.84044	6.90248	6.86476	6.04606	6.01211	6.09586	6.47635	6.63	6.64962
Cabp7	ENSMUSG00000009075	0.815911	0.76236	0.664429	0.288819	0.395469	0.132819	0.144588	0.12154	0.0419964	0.602048	0.340185	0.336338	0.0751435	0.082253	0.126595	0.459256	0.380928	0.341321	0.0545107	0.0896103	0.156873	0	0	0.0436578	0.0399511	0.0440197	0.0617278	0.0270765	0.0600174	0.013401	0.0484127	0.0300542	0.0442946	0.0722414	0.081182	0.0436539	1.02466	0.896502	1.01987	0.102446	0.013164	0.0952396	0.098489	0.0812896	0.0660091	0.0559007	0.02634	0.0151998
Derl3	ENSMUSG00000009092	2.15431	1.77053	1.89566	1.0764	1.23478	0.697672	2.05374	1.87105	1.60133	1.08165	0.923491	1.00552	1.93515	1.66056	1.68582	1.17187	1.1785	0.905364	1.03652	0.858313	0.704233	1.34761	1.28982	1.30363	0.913038	0.780287	0.910221	1.43697	1.41655	1.17588	1.30707	1.32372	1.20817	1.06209	1.24641	1.21177	1.92356	1.75516	1.69718	0.937966	1.07154	0.958919	0.891076	1.31486	1.22616	1.31688	1.27532	1.30347
Tbx1	ENSMUSG00000009097	0.701082	0.5899	0.605233	1.66418	1.82778	1.40268	2.63588	2.77354	2.68527	2.54566	2.43887	2.6476	1.47783	1.42952	1.43283	1.90304	2.37324	1.9891	2.0696	2.18419	1.90459	1.78469	1.91658	1.85782	4.23195	4.57128	3.9665	3.25929	2.95463	2.88198	2.27844	2.28342	2.07463	1.94075	2.01216	1.94173	2.05165	2.07647	1.89987	2.92927	3.89113	3.13369	1.87114	2.04138	1.85702	4.52139	4.28247	4.81283
Gnat2	ENSMUSG00000009108	1.01316	0.887694	0.572482	1.5128	0.760098	1.60519	1.37685	1.55945	1.33469	1.46451	0.920577	1.21516	0.767902	0.521101	0.849836	1.06961	1.33111	1.66374	1.02105	0.629395	1.20314	0.875318	0.648507	0.941792	1.046	1.15187	0.865539	0.637873	0.53606	0.818485	0.963918	0.92447	1.02289	0.561769	0.83413	0.616237	1.1463	0.70412	0.794225	0.370405	0.454419	1.01024	0.285545	0.258871	0.18158	0.970436	0.855287	0.746538
Lnp	ENSMUSG00000009207	4.05136	4.23311	4.09906	4.49918	4.2703	4.5101	3.88156	4.14833	4.25552	4.44734	4.59409	4.5294	3.8667	3.81732	4.01842	4.65456	4.46546	4.82994	4.07399	4.01876	4.01619	4.73335	4.42217	4.41353	4.02807	4.03485	4.14283	4.54301	4.36737	4.37343	3.94983	3.88567	4.00739	4.73504	4.60944	4.60721	4.33962	4.22662	4.07815	3.64794	3.6676	3.57889	4.25951	4.3133	4.13577	3.80257	3.78898	3.79685
Tmem8c	ENSMUSG00000009214	0	0	0	0	0	0	0	0	0	0.150939	0	0	0	0	0	0.609145	0.283781	0.554095	0	0	0	0	0	0	0	0	0	1.88688	1.54124	1.03194	0	0.0359352	0	0.230117	0.126831	0.0347047	0	0	0	0	0.0526575	0.0247473	0.0873842	0.155782	0.102381	0.110905	0	0
Fam163b	ENSMUSG00000009216	0.0703869	0.169033	0.16747	0.188321	0.199528	0.0269751	0.791719	0.762524	0.46638	0.130927	0.153459	0.103426	0.436602	0.508002	0.368373	0.166514	0.143879	0.183368	0.225866	0.166385	0.276738	0.292655	0.147809	0.239256	0.437654	0.358193	0.31095	0.170103	0.128962	0.124929	0.467947	0.454809	0.286368	0.038616	0.0482189	0.0385217	0.147529	0.196134	0.255161	0.648652	0.481147	0.404106	0.433317	0.494381	0.573743	0.364402	0.314541	0.48689
Trpm5	ENSMUSG00000009246	0.022802	0	0.0175444	0.0215013	0	0	0	0.0622756	0.0100733	0.0630249	0.0108303	0.0379798	0.104169	0.179882	0.167007	0	0.0545361	0.249398	0	0.0214942	0	0.211673	0.143696	0.065683	0.0095678	0.041728	0.0689217	0.670705	0.491134	0.40736	0.10027	0.0211902	0.0564522	0.0924019	0.0645834	0.0205804	0.179645	0.228084	0.12322	0.0281128	0.164766	0.0340433	1.9415	1.87009	2.23541	0.0186876	0.00944088	0.0658244
Ascl2	ENSMUSG00000009248	0.0818443	0.236253	0.0838617	0.284192	0.147464	0.12711	0.321039	0.265392	0.0943654	0.29039	0.127419	0.133237	0.433996	0.244545	0.510875	0	0.0664356	0.168714	0.805213	0.634285	1.05287	0.183218	0.121515	0.0981989	0.703475	0.817524	0.575277	0.155776	0.126199	0.194079	1.17452	1.01213	1.00295	0.190892	0.136849	0.189952	0.0230968	0.20119	0.202577	1.22441	0.82312	1.18349	0.144963	0.241076	0.180675	0.607329	0.574038	0.446334
Rarres2	ENSMUSG00000009281	0	0	0	0.258964	0	0	0	0	0.0642975	1.44581	1.17217	1.43717	0	0.0639219	0.172336	0.0888828	0.32651	0.476187	0	0	0	0.799717	0.655508	0.697779	0.0619584	0.0689353	0	1.85121	1.80516	1.41808	0.0566188	0	0.0693636	0.520272	0.344547	0.694125	0.0619885	0.112616	0	0	0.0591551	0	0.749262	0.768925	1.0434	0	0	0
Pttg1ip	ENSMUSG00000009291	5.88496	5.80344	5.84339	5.40647	5.27348	5.4231	6.19457	6.07404	5.95616	5.36052	5.27953	5.20094	6.10363	6.13544	6.14284	5.3731	5.24985	5.22764	6.2941	6.19925	6.32175	6.01617	6.02038	5.75855	6.30643	6.21381	6.21627	5.82357	5.73174	5.74401	6.25544	6.23549	6.28051	5.82242	5.77333	5.84458	6.07024	6.05204	5.96424	6.0298	5.95557	6.0007	6.11978	6.19224	6.10278	6.0092	6.09883	5.93367
Mpo	ENSMUSG00000009350	0.0843094	0.103118	0.0141015	1.71598	2.32254	2.03176	0	0	0	1.25264	1.49536	1.44014	0.193461	0.0319832	0.301441	0.904293	1.50083	1.31394	0.0556519	0.0172027	0	1.67908	1.87801	1.72453	0.0155909	0.080715	0.017576	1.61729	1.63074	1.65585	0.0279126	0.15639	0.0990588	1.43786	1.36323	1.24277	0.0903346	0.15825	0.182757	0	0	0.0122508	0.785018	1.1142	0.531592	0.0949566	0.0533566	0
Lpo	ENSMUSG00000009356	0.564887	0.389982	0.356444	0	0	0	0.248438	0.209935	0.189596	0	0.0135933	0	0.212822	0.177293	0.198109	0	0.0912753	0	0.130061	0.410228	0.11602	0.0883306	0.0260179	0.0260997	0.126646	0.126983	0.146797	0	0	0.011956	0.855621	0.0661027	0.366215	0.013143	0.0123529	0	1.02219	0.994838	0.914548	0.420546	0.124234	0.175472	0.0113214	0.0123781	0.0100075	0.0622013	0.157105	0.760163
Met	ENSMUSG00000009376	3.33675	3.37738	3.2176	0.878619	0.629958	0.827011	4.40675	4.36463	4.50085	0.826143	1.02817	0.722873	4.15713	4.16661	4.25771	1.12841	1.00223	0.941283	3.83928	4.0282	3.99672	2.01399	1.7847	1.79474	4.12463	4.22154	4.01082	1.99973	1.751	1.31623	3.93798	3.89734	3.83028	1.162	1.19354	0.995545	3.74128	3.58043	3.52706	3.73856	3.65898	3.58541	2.21647	2.02596	2.03712	3.84398	3.87346	4.09516
Slc16a12	ENSMUSG00000009378	1.65743	1.76922	1.60105	0.0473389	0	0.0945316	0.956873	1.28486	1.26	0.0672182	0.038093	0.0169967	0.995212	1.03219	0.969023	0.012627	0.0733169	0.0992606	0.743519	0.665992	0.962969	0.0613193	0.0901608	0.0904677	0.632129	0.659917	0.785988	0.0674902	0.0192232	0.0584538	0.565225	0.589531	0.639174	0.0460435	0.0687155	0.0459686	1.65055	1.60432	1.83712	0.316092	0.231645	0.269384	0.116316	0.00880294	0.0559827	0.209815	0.282133	0.335363
Syn2	ENSMUSG00000009394	1.11676	1.07136	0.983859	0.304832	0	0.218826	0.37754	0.382186	0.34889	0.326859	0.359423	0.500381	0.19237	0.12221	0.262113	0.259651	0.520132	0.244672	0.189143	0.257151	0.268134	0.32244	0.358799	0.377177	0.210922	0.220377	0.215778	0.48757	0.499612	0.483168	0.232856	0.170193	0.166924	0.281369	0.217114	0.164239	2.0508	1.88719	1.88951	0.137467	0.115221	0.0606683	0.346787	0.51704	0.426639	0.0590548	0.0695619	0.100684
Nav1	ENSMUSG00000009418	5.81576	6.01331	5.72657	4.91863	3.68	4.80928	4.94425	4.92951	4.67623	4.53021	4.5648	4.38593	4.97867	5.11617	5.12379	4.7834	4.91095	4.72966	3.68018	3.80857	3.8196	4.5016	4.6432	4.60473	3.99727	4.08956	4.01579	4.3181	4.14801	4.17998	4.19478	4.27782	4.21389	4.01365	4.53256	4.18808	5.10114	5.1508	5.12736	3.11412	3.29048	3.27615	4.01879	3.87284	3.85834	2.92911	2.72395	3.01971
Tnpo1	ENSMUSG00000009470	6.58284	6.68406	6.59209	6.70282	6.10809	6.7454	6.55616	6.61137	6.61343	6.55718	6.75106	6.65356	6.51534	6.60696	6.47794	6.62528	6.79533	6.81605	6.54269	6.56171	6.51112	6.40241	6.28888	6.31887	6.42944	6.49222	6.5378	6.3632	6.3221	6.36395	6.48352	6.48601	6.49662	6.38175	6.54225	6.4222	6.45662	6.48124	6.45149	5.95994	5.93408	5.96355	5.89487	5.90011	5.8125	5.95909	5.84001	5.92549
Myod1	ENSMUSG00000009471	0.0242079	0.0791629	0.0187317	0	0	0	0	0.021651	0.125195	0.950623	0.630815	1.09402	0	0.0424346	0.11683	1.67303	1.24949	1.18714	0.0411573	0.0454339	0.11131	0.0817133	0.0215976	0.0201651	0.28368	0.327307	0.238658	4.46201	4.02349	3.57471	0.288532	0.345311	0.430626	1.24881	0.627704	0.414829	0.0403054	0.0731588	0.0715374	0.770425	0.722198	0.477184	0.109662	0.118848	0.0166485	0.542215	0.528251	0.608686
Rnmt	ENSMUSG00000009535	5.78277	5.89519	5.94187	5.76695	5.63332	5.86987	5.66234	5.79093	5.96296	5.70088	5.7965	5.78313	5.79944	5.86336	5.72774	6.31818	6.04315	6.04884	5.74828	5.6929	5.74754	5.36828	5.51454	5.38337	5.70624	5.68343	5.63595	5.39447	5.29587	5.43928	5.78474	5.71296	5.83926	5.51966	5.53269	5.54216	5.78185	5.75545	5.60342	5.59728	5.34103	5.35434	5.18515	5.01914	4.77153	5.46808	5.43531	5.18639
Kcnq1	ENSMUSG00000009545	0.285621	0.521192	0.326258	0.98436	0.784161	1.59061	0.264541	0.319768	0.157615	0.775571	1.74494	0.510494	0.356105	0.452396	0.261099	0.888391	1.3151	0.767341	0.0509569	0.0268043	0.0662426	1.7079	1.26736	1.86148	0.140039	0.0563284	0.0674929	1.35722	1.25086	1.31217	0.111561	0.0656662	0.115413	1.41036	1.86753	1.02566	1.03446	0.409613	0.360726	0.0355986	0.0587876	0.0861893	0.928883	1.26246	0.584596	0.0383071	0.0359345	0.0288968
6330409D20Rik	ENSMUSG00000009551	0.305739	0.19847	0.709043	0.150925	0.405101	0.324335	0	0	0	0	0	0.116022	0	0.0717197	0	0	0	0.0385466	0.036107	0	0	0.417227	0.214856	0.247959	0	0	0	0.103395	0.0396265	0.113794	0.0319006	0	0.0389376	0.313093	0.105174	0.214449	1.24819	0.967489	1.05274	0	0.056679	0.0315327	0.0325236	0.191358	0.0846324	0	0	0
Mkl2	ENSMUSG00000009569	4.04018	4.04443	3.89945	3.73395	3.2887	3.67343	4.22887	4.31877	4.17648	3.68509	3.87729	3.53969	4.1644	4.24993	4.21297	3.59143	3.66281	3.75868	4.45054	4.50145	4.36427	4.12136	4.01811	3.85808	4.57656	4.60957	4.37637	4.01184	3.78954	3.9521	4.45946	4.41747	4.30502	3.91926	4.17131	3.956	4.06472	4.10252	3.98384	4.30685	4.36116	4.32572	4.08333	4.00048	4.09571	4.09287	4.25478	4.31755
Cbx5	ENSMUSG00000009575	7.62269	7.84007	7.80129	7.96967	7.12475	8.00209	7.52735	7.72482	7.86209	7.8657	7.98832	7.91858	7.71929	7.75968	7.72224	7.94992	7.96792	8.09389	7.59093	7.60695	7.42266	7.73864	7.64321	7.60745	7.56319	7.58741	7.54003	7.64121	7.57298	7.59075	7.64399	7.61495	7.58024	7.59068	7.76633	7.57332	7.57953	7.57597	7.41932	7.36476	7.14796	7.00826	7.47491	7.32859	6.77031	7.26593	7.15732	6.95451
Odam	ENSMUSG00000009580	0.113179	0.110282	0.0872287	0	0	0	0	0	0	0	0	0	0	0	0	0	0	0	0	0	0	0.0504605	0	0	0.050034	0	0	0	0	0	0	0	0	0	0	0	0	0.0519004	0.0255381	0.527235	0.76027	0.46548	0	0	0	1.62079	1.7587	1.49581
Apobec3	ENSMUSG00000009585	3.58419	3.51884	3.50187	2.09817	1.75605	2.55828	2.34197	2.55039	2.46894	2.30699	2.14899	2.33993	2.99481	3.22471	3.03736	2.20248	2.48458	2.47492	2.51774	2.43321	2.65099	2.13145	2.2678	2.03298	1.83314	1.81113	1.88248	2.6927	2.37306	2.45591	1.71446	2.08122	2.27777	1.98025	2.05686	1.80649	3.78812	3.74325	3.83083	1.99918	1.74845	1.89134	2.11428	2.66373	2.39678	1.59599	1.3034	1.42044
Sardh	ENSMUSG00000009614	0.319493	0.215896	0.628116	1.27783	1.10662	1.66286	0.356512	0.168939	0.274537	1.61242	0.567252	0.802128	0.915515	0.461277	0.327905	2.05235	1.2945	1.64659	0.465919	0.648553	0.75077	3.17123	3.01803	2.53714	0.650205	0.58766	0.248966	2.64584	2.60303	2.58391	0.627738	0.839648	0.741728	2.709	2.23795	2.28784	1.77046	1.93921	1.29577	0.91176	0.695618	0.424413	3.11356	3.41347	3.14519	0.747513	0.523855	0.496942
Vav2	ENSMUSG00000009621	4.7043	4.69491	4.67968	3.88923	3.72208	3.93217	4.94344	4.92791	4.8194	3.99345	3.91977	3.778	5.0462	5.06546	5.1029	4.18562	3.87826	3.90467	5.13447	5.13202	5.28074	3.45214	3.50329	3.56856	4.84379	4.88426	4.97186	3.56571	3.69783	3.65853	5.10455	5.23517	5.15914	3.64764	3.56315	3.53679	4.56229	4.52136	4.61411	4.60157	4.52104	4.56969	2.99742	3.17772	2.96863	4.31452	4.11802	4.21025
Tex15	ENSMUSG00000009628	3.52559	3.65819	3.47822	0.911543	1.04674	0.73322	1.51669	1.5048	1.48637	0.973726	0.99999	0.728864	2.22411	2.10039	2.03025	0.654903	0.946835	1.15853	2.19551	2.38528	2.31343	1.60784	1.48247	1.19091	2.00921	2.03743	1.85813	1.45218	1.05233	1.19433	2.24641	2.32902	2.1948	1.66631	1.84289	1.57374	4.70907	4.72036	4.41454	1.7053	1.79412	1.8303	2.72989	2.60389	2.87276	1.80405	1.99847	2.02839
G0s2	ENSMUSG00000009633	2.4339	2.34481	2.16115	2.66135	2.88196	2.68962	2.56582	2.14764	1.97332	2.94032	2.83129	2.86336	2.417	2.55631	2.52565	2.72366	2.54991	2.79247	1.58926	1.87932	1.84128	3.68913	3.6723	3.46348	2.23553	2.34667	2.49341	3.16281	3.11608	3.14062	2.20039	2.12756	2.1982	3.40878	3.2849	3.40889	1.79798	2.22786	1.74786	1.87117	1.86177	1.68432	4.22609	4.25167	4.07809	2.07023	2.31033	2.0401
Oit3	ENSMUSG00000009654	0.766417	0.618859	0.821773	0.439809	0.717018	0.723635	2.03642	1.9118	1.83153	0.672862	0.764733	0.52939	1.3925	1.35436	1.4183	0.95443	0.473821	0.772199	2.85505	2.77017	3.02137	0.658259	0.458736	0.341182	2.28244	2.33926	2.41219	0.339197	0.397932	0.4149	2.41851	2.51553	2.59244	0.284492	0.355308	0.396371	0.206968	0.127453	0.237999	2.78256	2.7497	2.77971	0.357649	0.366276	0.302706	2.27444	2.34076	2.08415
Fxyd5	ENSMUSG00000009687	0.33256	0.570889	0.300106	3.58631	3.73915	3.57203	0	0.163235	0.318837	2.82845	3.25232	3.08631	0.200092	0.318018	0.125138	3.48303	3.16033	3.50171	0.74218	0.466182	0.17655	3.49562	3.32737	3.07832	0.584517	0.318143	0.183911	3.19086	3.07266	2.95268	0.433845	0.321857	0.415521	3.33066	3.13046	2.88538	1.42673	1.34647	1.23304	0.7022	1.0919	1.12714	3.21018	3.25374	3.54686	1.39695	1.28976	1.42595
Kcnd1	ENSMUSG00000009731	1.45475	1.37023	1.39365	0.657678	0.429982	1.02971	1.80703	1.86802	1.81556	0.667145	1.09895	0.88222	2.10585	2.02548	2.28988	0.718295	0.849079	0.723364	1.16109	1.35428	1.42576	1.18813	1.21168	1.06741	1.2786	1.20907	1.28467	0.906044	0.880345	0.929468	1.41757	1.35971	1.33951	1.09465	0.969108	1.02819	1.09418	1.06037	0.964552	1.20126	1.30938	1.31706	1.42443	1.49887	1.27483	1.22469	1.04087	1.28111
Pou6f1	ENSMUSG00000009739	2.31145	2.23294	2.19824	1.95013	1.75107	1.83023	2.56801	2.55461	2.31309	2.04899	2.12452	2.09275	2.55066	2.53154	2.83256	2.70644	2.43988	2.38823	3.27699	3.1355	3.10605	3.72357	3.56112	3.53735	3.17872	3.03509	3.09814	3.25541	3.00404	3.03695	3.08239	3.05329	3.00961	3.154	3.10856	2.99987	2.75562	2.82898	2.68718	3.29982	3.37062	3.274	4.52074	4.39051	4.38878	3.12246	3.1141	3.01508
Nuak2	ENSMUSG00000009772	4.32176	4.19597	4.1258	0.532158	0.487312	0.437274	3.16504	2.94593	2.76096	0.291691	0.379687	0.352406	3.12416	3.11971	3.19498	0.689151	0.291348	0.223452	1.6238	1.5751	1.72001	0.471266	0.44829	0.330744	2.14463	2.21652	2.15623	0.393609	0.315934	0.405986	2.36119	2.43307	2.63885	0.176508	0.199595	0.225139	4.48193	4.54634	4.47599	1.69197	1.71057	1.89187	0.532345	0.607218	0.277816	1.40264	1.20491	1.1818
Ick	ENSMUSG00000009828	5.38237	5.57792	5.51999	5.74257	5.14363	5.71872	5.19328	5.18363	5.02454	5.81677	5.80926	5.72405	5.04172	5.09357	5.19994	5.89292	5.90472	5.98043	5.07328	4.96158	5.10423	5.72168	5.68227	5.46851	4.99451	5.00356	4.89592	5.5546	5.39236	5.55085	5.06296	5.09697	5.06294	5.7491	5.71292	5.6087	5.18915	5.1653	5.05859	5.02406	4.94298	4.86949	5.84366	5.68416	5.72935	4.6881	4.96901	4.91767
Cox4i2	ENSMUSG00000009876	3.2797	3.19342	3.43417	1.99063	2.58378	2.25166	4.89551	4.77348	4.40123	3.33153	3.2681	2.9067	4.56691	4.46938	4.59128	2.08809	2.1957	2.56284	5.46582	5.44032	5.43695	3.7436	4.02329	3.76252	5.03161	4.98112	4.93314	3.4984	3.23772	3.65184	5.05749	5.14337	5.15107	3.94441	3.62525	3.92225	3.36946	3.49117	3.50696	5.13299	5.14709	5.16201	3.76075	3.90262	3.94619	4.66081	4.78062	4.89325
Wnt3a	ENSMUSG00000009900	0.845307	0.541118	0.803516	0	0	0	1.73311	1.26761	1.2747	0	0	0	1.01038	0.86824	0.936172	0	0	0	4.62672	4.50807	4.43733	0	0.0139016	0.0139445	4.20972	4.00368	4.18604	0.0256912	0	0	4.27845	3.99547	3.81928	0.0139821	0.0131401	0.0139446	0.699839	0.523489	0.751215	4.85754	4.89011	4.95376	0.0239763	0.0262053	0.0212044	4.68909	4.82386	4.78961
Kdsr	ENSMUSG00000009905	2.7991	2.80233	2.8962	2.42951	2.43519	2.31651	2.85884	2.80663	2.90787	2.40213	2.31961	2.37849	3.04999	2.96079	3.03226	2.63346	2.5188	2.37412	2.98568	3.06294	2.95013	2.85703	2.90013	2.74944	3.35278	3.38244	3.23096	2.72025	2.65683	2.61433	3.14784	3.12766	3.0764	2.79961	2.69516	2.70473	3.29855	3.23607	3.20315	2.7808	2.9074	2.84529	2.91319	3.16678	3.02206	2.99936	2.92923	3.01005
Vps4b	ENSMUSG00000009907	6.05803	6.24171	6.14325	6.04404	5.54798	6.09136	6.25968	6.30281	6.42546	6.04194	6.22241	6.06883	6.20057	6.30329	6.11155	6.04714	6.04966	6.2664	6.352	6.28466	6.41287	5.89483	5.76462	5.79011	6.34741	6.28455	6.37063	5.79312	5.77958	5.75842	6.2933	6.21454	6.31393	5.90279	5.88183	5.77428	6.215	6.22691	6.14903	5.96334	5.88422	5.69197	5.4821	5.39295	5.25864	5.90687	5.98444	5.78595
Rps25	ENSMUSG00000009927	7.67462	7.9567	7.71429	8.03149	8.30535	8.37378	7.8721	8.11777	8.10823	8.33095	8.50521	8.29703	7.70316	8.00264	7.8303	7.81148	8.2948	8.61398	8.25964	7.98343	8.23275	8.018	8.09466	7.77464	8.41782	8.4349	8.42091	8.1378	7.93061	7.95982	8.40331	8.30559	8.56276	8.09138	7.72941	7.9726	8.18289	8.1125	7.94169	7.80744	7.98347	7.99598	7.24892	7.34542	7.41298	8.07745	8.05918	8.07517
Taz	ENSMUSG00000009995	5.1775	5.0714	5.04374	4.74634	4.44616	4.77903	5.23992	5.19277	4.84626	4.87029	4.69268	4.61749	5.23354	5.12654	5.13221	4.63631	4.6801	4.53004	5.34053	5.42855	5.5062	5.19167	5.17415	5.08134	5.49223	5.53745	5.50106	5.07028	4.98182	5.23686	5.52458	5.47076	5.36881	5.28264	5.18729	5.17462	5.3232	5.33018	5.3176	5.38923	5.38656	5.58895	5.06029	5.11092	5.15298	5.47772	5.33205	5.45851
Kif19a	ENSMUSG00000010021	4.99728	4.75471	4.69452	1.20459	1.999	1.51888	0.711311	0.727485	0.525198	0.488921	0.200781	0.0626744	0.902759	1.21755	0.933946	1.12963	1.15936	0.45306	0.632297	0.539521	0.681854	0.922147	0.825734	0.719907	0.0732197	0.227772	0.105679	0.331767	0.292156	0.311891	0.231035	0.222534	0.150219	0.699033	0.431628	0.48014	5.77339	5.64109	5.56068	0.0415396	0.226102	0.12898	1.37383	1.91248	1.48036	0.0754676	0.138537	0.11463
Aldh3a2	ENSMUSG00000010025	3.73964	3.68979	3.68777	3.69359	3.52696	3.74636	3.61182	3.53382	3.4657	3.53529	3.57966	3.56975	3.499	3.54995	3.46193	3.32942	3.40573	3.3011	3.82093	3.64577	3.73304	4.21357	4.16145	4.04636	3.71467	3.6822	3.72731	4.01013	3.90983	3.88472	3.67944	3.61941	3.63392	4.01826	3.93437	3.91459	4.3918	4.29816	4.26248	3.66949	3.65284	3.70104	4.23762	4.29617	4.27659	3.71998	3.82542	3.75906
Zmynd10	ENSMUSG00000010044	0.702483	0.162414	0.624802	0.545378	0.283239	0.314325	0.551603	0.393781	0.680255	0.271963	0.1666	0.339003	0.384409	0.287712	0.442047	0	0.572827	0.466251	0.166469	0.102105	0.172164	0.492342	0.607854	0.325097	0.421058	0.178396	0.0729192	0.341793	0.186014	0.583423	0.6563	0.461798	0.297715	0.380876	0.46994	0.401641	0.750709	0.53645	0.591112	0.432715	0.447993	0.34909	1.00732	0.465717	0.644205	0.325736	0.460513	0.378934
Ifrd2	ENSMUSG00000010048	5.37845	5.6274	5.44297	6.20181	6.2168	6.1732	5.61944	5.4949	5.25056	5.80842	5.59272	5.72666	5.11145	5.20122	5.29597	5.77761	5.94219	5.86482	5.10708	4.87427	4.96157	5.18982	5.41874	5.1707	5.16781	5.20869	4.84037	5.37415	5.28123	5.29712	4.92619	5.05994	5.10926	5.21991	5.26629	5.26763	5.19069	4.9033	5.02024	5.00519	5.19665	5.16415	5.04936	5.04352	5.20313	5.04981	5.26386	5.37841
Hyal1	ENSMUSG00000010051	3.26718	3.20241	2.97536	2.35272	1.45655	2.16113	4.60886	4.60628	4.33615	2.5902	2.10491	2.53547	4.71221	4.7377	4.8714	2.76392	2.20482	2.37039	3.93025	3.88381	3.88057	2.85373	2.61195	2.38381	4.38958	4.54511	4.42207	2.59176	2.2709	2.46332	4.36972	4.34707	4.40407	2.39631	2.22068	2.39133	2.91923	2.85748	2.9888	3.89645	4.01721	3.94737	3.4247	3.26569	3.13984	4.0903	4.09572	4.16457
Tusc2	ENSMUSG00000010054	6.302	6.20814	6.26428	5.92392	5.98151	5.88242	6.03019	5.82361	5.86682	5.93837	5.94011	5.81691	5.82589	5.77384	5.89471	5.91899	5.85026	5.94633	5.30553	5.35696	5.40398	5.18578	5.38516	5.26323	5.40343	5.4387	5.27018	5.45888	5.35479	5.54013	5.32526	5.31114	5.48526	5.25871	5.17462	5.45453	5.95055	5.906	5.85172	5.27478	5.23819	5.17027	5.14871	5.2483	5.20847	5.07409	5.08491	4.92197
Slc38a3	ENSMUSG00000010064	2.52017	2.63303	2.60831	2.61704	2.31904	2.42936	1.60999	1.46732	1.26078	1.88249	1.8677	2.1011	2.1757	2.30987	2.43491	2.15887	2.34331	2.35596	1.11093	0.923355	1.1399	2.43075	2.48872	2.30927	0.858899	0.936314	0.877331	2.15906	2.22933	2.08592	1.63034	1.41431	1.13935	2.15729	2.02029	1.95953	1.90672	2.01054	2.04745	0.858782	1.12782	0.888811	2.35646	2.22034	2.25858	1.37866	1.14323	1.4108
Cacna2d2	ENSMUSG00000010066	1.52497	1.18011	1.4168	1.15529	0.625089	1.36806	0.905201	0.997906	0.662363	0.918274	1.30519	0.663718	0.765631	0.998125	1.36503	1.45352	0.729517	1.3112	0.803141	0.355963	0.344965	1.88854	1.44181	1.23273	0.586758	0.641433	0.452241	1.08293	0.84149	1.06639	0.435258	0.687255	0.524063	1.76952	1.50532	1.60364	1.22053	1.23784	1.15288	0.485984	0.376647	0.669982	2.69426	2.72676	2.97704	0.492606	0.676144	0.981511
Rassf1	ENSMUSG00000010067	5.14329	5.01709	5.01315	4.75585	5.13986	4.81118	4.55292	4.3338	4.24869	4.70524	4.56276	4.67361	4.46687	4.51323	4.53574	4.90783	4.71865	4.69466	4.42283	4.44516	4.60709	5.02029	5.09323	4.87007	4.74989	4.72189	4.54405	5.21963	5.01027	5.13173	4.66158	4.53542	4.68317	5.36254	5.08483	5.0288	5.27647	5.27088	5.21581	4.87444	4.80802	4.8218	5.15538	5.37559	5.32594	5.10806	4.88274	4.94392
Epn3	ENSMUSG00000010080	4.70956	4.53773	4.61039	0.925796	1.05955	0.56216	4.4635	4.36159	4.07336	0.882109	0.783216	0.753353	4.20959	4.29453	4.2247	1.31618	0.699322	0.374031	4.49977	4.52502	4.63575	1.34154	1.18404	1.08492	3.83224	4.12672	4.06328	1.01794	0.889308	1.15432	3.97933	4.03541	4.17227	0.5909	0.599781	0.769251	4.93131	4.92486	4.94236	3.86027	3.65749	3.6922	1.5685	1.66074	1.38148	3.19766	3.40523	3.29406
Rnf112	ENSMUSG00000010086	2.05461	1.90753	2.2866	0.709464	0.86062	0.345629	0.137329	0.348298	0.1348	0.174796	0.121085	0.187204	0.124504	0.11419	0.123948	0.213762	0.14577	0.354933	0.0905916	0.100195	0.159572	0.770543	0.781386	0.760278	0.150979	0.153266	0.294463	0.719381	0.587477	0.682855	0.228005	0.203498	0.208791	0.933354	0.59276	0.726991	2.95967	2.94725	2.86076	0.0858426	0.117688	0.090457	1.30344	1.36706	1.39096	0.191042	0.117363	0.212949
Slc3a2	ENSMUSG00000010095	6.09008	6.09367	5.97558	6.16019	6.08575	6.10008	5.81735	5.70108	5.50456	6.08206	6.04148	5.94791	5.79818	5.8173	5.74643	6.19105	6.18936	6.18654	6.23302	6.22339	6.24644	5.62772	5.67518	5.58028	5.84822	5.8408	5.79993	5.49658	5.40465	5.45817	6.16629	6.18136	6.11231	5.59823	5.53411	5.62034	5.85337	5.78244	5.81891	6.78558	6.84475	6.98148	5.79778	5.72193	5.88665	6.41672	6.47331	6.61753
Tnfrsf13b	ENSMUSG00000010142	0.360269	0.5835	0.393437	1.14459	0.473185	1.44647	0.374407	0.265424	0.240027	0.878281	0.754539	0.659897	0.355171	0.198132	0.319324	0.883689	1.17609	0.76548	0.350072	0.252664	0.254188	0.901581	0.748739	0.489133	0.643342	0.361728	0.543292	0.781427	0.535054	0.655945	0.264968	0.264504	0.32831	0.77013	0.509441	0.637426	0.499073	0.431399	0.373797	0.818797	0.739751	0.42244	0.921636	0.911053	0.607609	0.743769	0.720058	0.847354
Prox1	ENSMUSG00000010175	1.28488	1.4495	1.38572	0.305801	0.1116	0.35527	1.74288	1.94112	1.82416	0.707565	0.687648	0.703484	1.75493	1.73901	1.83944	0.589349	0.659996	0.479788	1.67433	1.69697	1.40294	0.291556	0.321055	0.260003	2.40026	2.26109	2.11753	1.25362	1.19223	0.97433	1.92741	1.9159	1.79052	0.394599	0.298005	0.232734	1.34375	1.41701	1.33129	1.98185	2.25093	2.2567	0.369598	0.382708	0.328282	1.63319	1.89758	1.91225
Tmem86a	ENSMUSG00000010307	2.79546	2.5665	2.64177	2.7325	2.96395	2.99421	2.27575	2.29208	2.04412	2.90951	2.83255	2.98152	2.1875	2.44653	2.50813	3.04457	2.86077	2.86504	2.87416	2.7519	2.99452	3.38109	3.51802	3.16301	2.3994	2.55602	2.54292	3.43568	3.29176	3.34977	2.61904	2.73443	2.75881	3.28665	3.09978	3.29915	2.82674	3.06908	2.88835	2.352	2.61718	2.36953	3.29156	3.45234	3.44604	2.21687	2.33065	2.10621
Optc	ENSMUSG00000010311	0.510329	0.382523	0.532125	1.79315	2.2659	1.51487	0.395481	0.548241	0.441056	0.192993	0.10685	0.303514	0.626589	0.379662	0.737723	0.183004	0.189732	0.168927	0.395214	0.436576	0.67266	1.00275	1.01043	1.21725	0.812032	0.472275	0.667963	0.559299	0.494547	0.63254	0.544904	0.612432	0.882161	0.896697	0.430727	0.559777	0.504321	0.768092	0.482333	0.67565	0.758503	0.754079	1.22563	1.16623	1.17969	0.783959	0.627824	0.781334
Tex14	ENSMUSG00000010342	0.311444	0.422708	0.240938	0.177601	0	0.0573671	0.317017	0.0468224	0.0775312	0.677736	0.166553	0.123353	0.317644	0.234607	0.087373	1.77336	0.151626	1.07841	0.236222	0.0576218	0.0893824	0.354287	0.145317	0.111587	0.28622	0.577095	0.158137	0.692607	0.719604	0.418934	0.124377	0.0651998	0.0568407	0.252439	0.07851	0.0818906	0.842479	0.677428	0.916262	0.0871303	0.05136	0.110402	0.157696	0.148011	0.250736	0.20098	0.0664155	0.129077
Ifi35	ENSMUSG00000010358	0.322563	0.26289	0.275912	1.34879	1.18161	1.50138	0.119659	0.15868	0.0897393	1.25922	1.08785	1.30338	0.240885	0.251278	0.527994	1.33177	1.27457	1.45986	0.867893	0.875934	1.08727	1.4154	1.74249	1.29209	0.907974	0.879743	0.825077	1.59268	1.54902	1.56795	1.05089	0.643907	0.875696	1.59707	1.55326	1.4151	1.27822	1.25944	0.894923	1.43291	1.68863	1.47677	1.69075	1.64721	1.91145	1.96156	1.68956	1.88426
Rdm1	ENSMUSG00000010362	3.98764	3.9915	4.05716	3.38407	4.02146	3.48698	4.73871	4.42635	4.28995	4.1396	3.97206	4.09484	4.30592	4.2301	4.41562	3.96321	3.52695	3.76116	4.96816	4.67976	4.87683	4.56357	4.52652	4.27143	5.04526	4.98801	5.05176	4.75341	4.54638	4.51619	5.01868	5.08871	5.03609	4.86071	4.54651	4.57845	4.28959	4.29615	4.08021	4.66148	4.57681	4.75864	4.57168	4.72434	4.78037	4.995	4.76955	4.73602
Eya4	ENSMUSG00000010461	5.12202	5.20598	5.14579	3.46036	2.90525	3.67579	2.82012	2.76914	2.88763	3.76604	3.7415	3.87162	2.62542	2.78504	2.80089	3.89931	3.82904	3.93146	0.931199	0.970932	0.814993	5.41682	5.10231	4.96428	2.7238	2.60373	2.63526	4.80124	4.67625	4.64598	1.89242	2.09835	1.96683	4.83461	4.92803	4.71007	5.59893	5.59011	5.42529	1.35201	1.92153	1.74355	5.43072	5.48397	5.17903	2.2452	2.24432	2.24254
Ebf3	ENSMUSG00000010476	4.07385	4.25126	4.16155	4.91576	4.60078	4.76445	0.839172	0.867722	0.898445	6.12673	6.17824	6.2394	0.317514	0.304783	0.477199	5.39101	5.63273	5.51597	0.510106	0.493918	0.570059	4.67962	4.52628	4.3953	0.343774	0.518896	0.459706	6.15939	5.9098	5.87549	0.145803	0.372743	0.220661	5.32601	5.17896	4.91436	5.77412	5.71464	5.56192	0.378949	0.592886	0.582977	6.09435	6.24441	6.30096	0.392255	0.258907	0.206477
Myt1	ENSMUSG00000010505	2.47745	2.66422	2.46344	0.423717	0.329924	0.408348	0.0583453	0.0184973	0.00737677	0.0100476	0.0388477	0.0205336	0.0250505	0.0955009	0.120958	0.426942	1.50495	0.0746997	0.184373	0.28029	0.104628	0.185357	0.0902329	0.18892	0.00890177	0.0463447	0	0.277255	0.202088	0.0653907	0.0627742	0.0689499	0.082039	0.313581	0.0350204	0.00932508	3.33652	3.29432	3.21755	0.0601649	0.206763	0.0594116	0.288351	0.541981	0.332388	0.0187767	0.01396	0.0402414
Gm266	ENSMUSG00000010529	5.72795	5.59488	5.63457	2.90477	3.27603	2.54488	3.47753	3.65259	3.79651	4.51214	4.33502	4.44553	3.93316	3.65076	3.95722	3.87631	4.12532	4.1242	2.50329	2.50088	2.70137	3.30078	3.38631	3.27275	4.18902	4.64581	4.38941	4.81908	4.74811	4.90607	3.9294	3.98299	4.04615	3.85563	3.88875	4.09764	6.06523	6.09996	6.26158	3.01111	3.24278	3.08051	2.94557	3.16333	2.71664	3.78201	3.82541	3.94345
Tsacc	ENSMUSG00000010538	3.21916	3.14202	3.16707	2.81695	3.43032	2.75315	3.48594	3.01309	3.30957	3.34484	3.00866	2.98694	3.4501	3.3088	3.79469	2.62635	3.35893	3.1709	2.52193	2.32852	2.61038	2.34214	2.19401	2.13639	2.86182	2.80249	3.08497	2.72379	2.53593	2.73364	2.96744	2.85582	3.10264	2.18925	2.35457	2.34975	3.0361	2.68025	3.02302	2.51549	2.52835	2.72087	1.97733	1.87723	2.47827	2.79677	2.70799	2.69949
Pigyl	ENSMUSG00000010607	4.88863	4.83755	4.97122	4.70187	5.14474	4.45785	4.31269	4.17082	3.98728	4.55939	4.68488	4.54034	4.44901	4.37163	4.31456	4.78361	4.54488	4.39415	4.6652	4.62169	4.72642	5.27482	5.5918	5.29905	4.77496	4.80438	4.65472	5.23987	5.09109	5.29525	4.88575	4.80772	4.79932	5.37017	5.09577	5.53717	5.42473	5.41792	5.37671	4.87211	5.07652	4.89254	5.19985	5.5043	5.28202	4.99295	5.0678	4.9015
Psen2	ENSMUSG00000010609	3.63352	3.75816	3.67397	2.74369	2.70909	3.09984	2.79774	2.83058	2.54099	2.40086	2.21175	2.1356	3.01658	2.59464	2.68692	1.88362	2.56312	2.54845	2.24979	2.39131	2.18055	2.65062	2.53244	2.30971	2.2049	2.18519	1.81233	2.66281	2.58139	2.44197	2.1619	2.25537	2.13433	2.44169	2.04413	2.44877	3.8996	3.86679	4.00503	2.42441	2.38598	2.55404	2.70103	2.92426	2.79902	2.39693	1.94884	2.41223
Acaa1b	ENSMUSG00000010651	1.15851	1.28618	1.20079	0.53158	0.609493	0.354349	1.2867	1.40632	1.02634	0.658948	0.637844	0.527756	0.767349	0.842421	0.792254	0.622298	0.423838	0.690603	1.03448	0.963756	1.11427	0.847277	0.866628	0.792416	1.11861	1.3715	1.29787	1.03238	1.39765	1.21431	1.35234	1.26613	1.1701	1.11009	0.944939	0.977558	1.55659	1.53294	1.59185	1.31795	1.32095	1.25484	0.939326	0.714209	0.928621	2.0808	1.97294	2.16787
Plcd1	ENSMUSG00000010660	3.66731	3.31987	3.51381	3.12893	2.77902	3.11327	4.24209	4.06365	3.93175	2.51976	2.61616	2.55505	4.10582	4.11059	4.08366	2.94451	2.89373	2.56116	5.33442	5.26034	5.44968	3.40018	3.38786	3.25746	5.14719	5.16867	5.00762	3.1202	2.90517	2.92097	4.77542	4.82045	4.80286	2.90905	2.71213	2.65436	2.64061	2.65584	2.63724	4.65418	4.64868	4.885	3.07977	3.3311	3.36349	4.22816	4.4059	4.46679
Fads1	ENSMUSG00000010663	6.66576	6.75502	6.71041	6.58435	6.46757	6.58821	6.65482	6.67449	6.61166	6.5838	6.56537	6.48817	6.66292	6.64808	6.63934	6.57558	6.54727	6.51678	5.96813	6.01746	6.16095	6.71495	6.72342	6.5486	6.05147	6.24782	6.17347	6.71176	6.49474	6.63263	6.17899	6.23174	6.33284	6.70239	6.67755	6.69861	6.61054	6.59876	6.65579	5.60355	5.65761	5.76589	6.33152	6.38592	6.49185	5.68704	5.68106	5.71875
Lmbr1	ENSMUSG00000010721	2.20958	2.36841	2.22717	1.90843	1.43855	2.12493	2.38298	2.53506	2.52109	1.79242	1.73011	1.853	2.40422	2.38467	2.38105	1.89608	2.02686	1.65552	2.84831	2.73871	2.76267	2.28534	2.17695	2.13552	2.69562	2.67806	2.70726	2.14934	1.93961	1.97418	2.66567	2.75853	2.69134	2.22317	2.1147	2.05366	2.66287	2.66337	2.58868	2.60554	2.65723	2.57941	2.22305	2.3536	2.23839	2.57146	2.54644	2.59512
Tnfrsf22	ENSMUSG00000010751	2.89378	2.65424	2.7627	3.46969	3.58394	3.54166	2.74647	2.56592	2.50983	3.46522	3.33215	3.55334	2.81347	2.49486	2.78442	3.18153	3.67902	3.57221	2.54062	2.48274	2.31581	3.65364	3.37617	3.47708	2.63551	2.61539	2.42242	3.28674	3.15581	3.14799	2.47342	2.52392	2.76472	3.43194	3.25973	3.28915	2.72628	2.68071	2.67491	2.71175	2.70479	2.63069	3.94155	3.69208	4.05487	2.72947	2.69937	2.7433
Cars	ENSMUSG00000010755	5.37427	5.32069	5.43091	5.60366	6.01258	5.78481	5.3086	5.14723	5.15541	5.43665	5.44428	5.38072	5.04652	5.13431	4.94025	5.62196	5.64048	5.62037	4.70091	4.621	4.81525	5.03374	4.99471	5.00765	4.74456	4.62818	4.69761	4.98502	4.83761	4.95717	4.77847	4.79509	4.80561	5.02241	4.96023	4.95709	5.15186	5.10317	5.05983	4.73963	4.69885	4.79153	4.59835	4.7341	4.91896	4.54662	4.63927	4.75367
Phlda2	ENSMUSG00000010760	1.78327	2.15295	2.09417	0.622464	0.119914	0.497094	2.7982	2.69344	2.4387	1.2288	1.24927	1.40147	1.95271	1.71381	1.93618	0.49325	0.948549	0.48688	3.06586	2.99796	3.05875	0.980162	0.907679	1.2094	2.98886	2.54234	2.80562	2.28702	1.84746	1.76377	2.99097	2.80019	2.63592	1.46648	0.960297	0.968471	1.6451	1.771	1.70727	4.0935	3.95077	3.76686	1.40779	1.68649	1.5431	3.54892	3.58328	3.84363
Wnt2	ENSMUSG00000010797	1.07204	0.981381	1.26555	0	0.259207	0.0710179	1.49924	1.37136	1.26914	0.246724	0.0717371	0.179503	2.31998	2.43316	2.20919	0.851131	0.138125	0.0683229	1.47046	1.62042	1.99126	0.318244	0.347789	0.273765	1.7223	1.56877	1.92022	1.42965	1.40603	1.61657	1.9637	1.48531	1.4123	0.881198	0.853057	0.846451	0.0827768	0.0732541	0.133018	0.65583	0.692789	0.679191	1.53128	1.60911	1.55053	0.665381	1.21705	1.09943
Gabra1	ENSMUSG00000010803	0.318191	0.42527	0.215841	0.290893	0.414097	0.239077	0.678817	0.319671	0.290326	0.518329	0.524834	0.46096	0.40056	0.902129	0.507888	0.879968	1.04951	1.45215	1.55548	1.60278	1.84009	1.93151	1.65642	1.85635	0.730498	0.691736	0.720913	0.941122	0.796541	0.74029	1.23318	1.38577	1.52321	1.72376	1.37092	1.47469	0.321974	0.34924	0.240436	0.986182	0.814102	0.766171	2.6142	2.6439	2.41254	0.818882	0.926469	0.881432
Kdelr3	ENSMUSG00000010830	3.05203	3.09142	2.97639	1.97261	2.20723	1.54594	2.82154	2.81259	2.66639	1.61752	1.55643	1.49079	2.09496	2.33035	2.12876	2.10415	1.5748	1.32676	3.6902	3.78522	4.04172	3.16105	3.2334	2.72191	3.00149	2.83841	2.94003	3.04522	2.59347	2.79461	2.94304	2.8548	2.79477	2.94763	2.7456	2.78607	2.70085	2.819	2.61658	3.50125	3.37959	3.4659	4.18853	4.29236	4.38244	3.16966	3.16518	3.02245
Apip	ENSMUSG00000010911	4.94028	4.74482	4.7082	5.67448	6.28762	5.74235	4.66043	4.58801	4.5645	5.73278	5.67634	5.57992	4.65377	4.59259	4.53926	5.80684	5.74509	5.85444	4.57952	4.56751	4.56471	6.07503	6.18948	5.98967	4.77923	4.70358	4.76655	6.13825	5.93195	6.0059	4.87714	4.78941	4.8281	6.24034	5.99684	6.18285	5.29287	5.25265	5.00127	4.63946	4.69049	4.69343	5.87581	5.85943	6.00441	4.62239	4.74928	4.58466
Pdhx	ENSMUSG00000010914	5.31685	5.35199	5.29785	5.7528	5.21295	5.64829	5.26495	5.23875	4.98911	5.68733	5.39586	5.65289	5.1123	5.10763	5.11432	5.6155	5.77181	5.60125	4.44229	4.45093	4.4574	5.04764	5.25037	5.05205	4.48016	4.52723	4.45655	5.12314	4.9305	5.08549	4.59826	4.55797	4.57495	5.21173	5.03371	5.13075	4.92012	4.88105	4.68139	4.50517	4.66063	4.45706	5.20849	5.26293	5.04523	4.53181	4.72469	4.36792
Panx3	ENSMUSG00000011118	0	0	0	0	0	0	0.0197701	0	0.0147965	0	0.0474488	0.0140965	0	0	0	0	0.080691	0.0306967	0	0.0160474	0.015692	0.0293859	0.015344	0.0153894	0	0.015521	0	0.0423044	0.0473476	0.0140268	0	0	0	0	0	0	0.148381	0.10152	0.0774905	0.0275186	0.0676091	0.0753	0.67051	0.628622	0.760638	0	0.0679387	0.0159073
Adssl1	ENSMUSG00000011148	2.94206	2.90606	2.79366	1.12771	0.922668	1.37078	2.3547	2.0773	2.27295	1.20811	1.50068	0.880244	2.62448	2.72559	2.68893	1.45351	1.14102	1.21066	1.74316	1.45627	1.72353	1.62805	1.5962	1.45505	1.71703	1.68637	1.79343	1.48903	1.53431	1.6911	1.39114	1.52916	1.709	1.11177	1.04199	1.12492	2.55841	2.6235	2.68492	1.57559	1.64565	1.58997	1.37741	1.50069	1.42704	0.91465	1.21385	1.12196
1700026D08Rik	ENSMUSG00000011154	0	0.0285277	0	0.181935	0.0924443	0.0932861	0	0	0	0.269902	0.10112	0.262053	0	0	0	0	0.156388	0.031305	0	0	0	0.301528	0.231169	0.204516	0.0284356	0.0622207	0.0142814	0.549259	0.578407	0.62215	0.0259474	0.0952921	0	0.292827	0.302527	0.343853	0.0244991	0.102882	0.0265808	0.0547728	0	0	0.407836	0.291533	0.279166	0.0296689	0	0
Vipr2	ENSMUSG00000011171	0.901551	1.02208	0.864697	1.73269	1.90475	2.03836	0.734075	0.738987	0.9135	1.48219	1.22196	1.24328	0.868428	0.76061	0.706999	0.865711	1.2981	1.6672	0.541076	0.745403	0.553725	1.95002	1.80103	1.75898	0.595248	0.729677	0.646657	1.69854	1.72987	1.70762	0.907583	0.731804	0.70524	1.50579	1.40799	1.14194	1.22078	1.20066	1.11998	0.605844	0.774039	0.8357	2.2367	2.20566	2.29753	0.726479	0.723227	0.78727
Odc1	ENSMUSG00000011179	8.26156	8.33568	8.26716	8.47165	8.50138	8.50663	8.3294	8.27639	8.24998	8.26613	8.34147	8.20436	8.06428	8.13668	7.98904	8.36353	8.38582	8.47131	7.8338	7.74421	7.81801	7.50173	7.57593	7.42525	7.80685	7.75482	7.80535	7.55326	7.37236	7.53276	7.90187	7.89782	7.99606	7.46245	7.37011	7.51452	7.9976	7.96768	7.87559	7.64216	7.66692	7.56834	7.21572	7.18973	7.23316	7.65737	7.55992	7.47774
Adam19	ENSMUSG00000011256	2.0731	2.08188	2.02647	4.42703	3.60376	4.32454	1.87588	1.82585	1.91664	3.80192	3.77633	3.70791	1.49298	1.51028	1.75102	3.83808	3.83342	3.83182	2.20269	2.26816	2.25594	4.8765	4.83259	4.58433	1.89795	1.98594	2.03498	4.69995	4.42992	4.44598	2.05899	2.02558	2.15094	4.52275	4.60711	4.41659	2.73073	2.6704	2.45466	1.92348	1.70999	1.67427	4.62666	4.55208	4.45262	1.0029	1.0073	1.03233
Pabpc4	ENSMUSG00000011257	6.73871	6.75884	6.60769	6.78295	6.44184	6.81678	6.80349	6.56405	6.12994	6.9854	6.81954	6.58516	6.32878	6.22504	6.42019	6.80506	6.81613	6.75689	6.09397	5.92039	6.35925	6.35634	6.53037	6.33886	6.33223	6.45249	6.37652	6.67627	6.6012	6.53256	6.37833	6.28081	6.4004	6.53653	6.40213	6.47626	6.61349	6.59839	6.60102	5.68242	5.99027	5.5801	5.83122	5.93162	5.6309	5.95609	5.85866	6.12388
Exoc3l2	ENSMUSG00000011263	0.0594435	0.0496695	0.0309181	2.48601	2.55859	2.35178	1.25048	0.733766	0.917365	2.51747	2.31985	2.40858	0.467631	0.518718	0.724465	1.77137	2.31542	2.3422	0.281486	0.0924562	0.261904	2.20281	2.43791	2.11945	0.68835	0.807605	0.611255	2.36443	2.24024	2.31665	0.41588	0.559382	0.530601	2.33624	2.22341	2.23637	0.409657	0.450027	0.211602	0.747829	0.835579	0.593777	2.02044	2.21514	2.16213	1.14478	0.898074	0.975053
Zfp296	ENSMUSG00000011267	0.943154	0.735332	0.72042	0.569699	0.431507	0.235629	1.04178	1.02361	0.852397	0.491953	0.402476	0.644479	0.982046	1.05203	0.717841	0.643973	0.623919	0.636602	0.811441	0.67439	0.79684	0.675497	0.608189	0.450645	0.553452	0.689919	0.668302	0.566715	0.689047	0.654767	0.691009	0.724457	0.63241	0.751587	0.583373	0.517996	0.826551	0.878971	0.772918	0.73428	0.704552	0.789284	0.765906	0.915261	0.851444	0.746169	0.770815	0.808447
Plin5	ENSMUSG00000011305	1.18655	1.11177	1.10223	0.0205021	0	0	0.619297	0.733775	0.702353	0.0416459	0.0412346	0.0715926	0.591228	0.926935	0.686014	0	0.120165	0	0.408085	0.351066	0.437711	0.0191153	0	0.0589074	0.282038	0.433718	0.516428	0.0184178	0.0206454	0.0360135	0.340606	0.440877	0.390209	0.0396672	0.0735921	0.0588656	0.830351	0.950424	1.08324	0.246809	0.184557	0.187205	0.0171307	0	0.059649	0.197762	0.201086	0.28092
Dhdh	ENSMUSG00000011382	2.487	2.58366	2.50848	2.28258	2.13087	2.02903	2.30208	2.38899	2.28712	2.68626	2.64726	2.62431	2.36309	2.38679	2.43974	2.5574	2.68789	2.57632	1.27272	1.56086	1.37461	1.80613	1.94461	1.84408	1.43294	1.57947	1.68742	2.01625	1.98939	2.15368	1.32145	1.36328	1.59272	1.83554	1.95268	1.81852	2.10394	2.06359	2.25535	1.13543	0.967414	1.09265	1.51019	1.56647	1.49264	0.854975	1.06735	1.13356
Fsd1	ENSMUSG00000011589	4.88099	4.67906	4.74067	4.14325	3.76934	4.1031	4.89556	4.59744	4.32084	4.33672	4.24971	4.26678	4.76255	4.71981	4.85363	4.04952	4.15046	4.04156	4.36766	4.28183	4.51283	4.18173	4.38944	4.19478	4.12478	4.31526	4.21248	4.22944	4.20536	4.23938	4.36729	4.4894	4.47772	4.35776	4.21004	4.27668	4.71153	4.63069	4.55493	3.86481	3.92301	4.00803	4.07161	4.13254	4.14819	3.67022	3.67245	3.72243
Fuz	ENSMUSG00000011658	4.01183	3.81326	3.89735	3.46625	3.54471	3.28352	3.79795	3.45346	3.51817	3.55353	3.45762	3.50667	3.68685	3.75226	3.86424	4.19279	3.36655	3.11149	3.51498	3.38965	3.46333	3.76556	3.69224	3.4976	3.58668	3.51918	3.64423	3.84436	3.59413	3.93097	3.50405	3.60488	3.6337	3.75843	3.66326	3.51285	4.24021	4.13982	4.19178	3.74904	3.9419	3.88105	4.03714	4.04747	4.25763	3.73734	3.84194	3.93062
Sptbn4	ENSMUSG00000011751	0.844777	0.693897	0.551597	0.198777	0.133414	0.230228	0.497156	0.330477	0.321078	0.180708	0.198914	0.621259	0.354607	0.453591	0.36919	0.021428	0.205356	0.227587	0.268113	0.250274	0.363329	0.29516	0.425211	0.539051	0.240291	0.341707	0.331234	0.236764	0.178008	0.215449	0.281854	0.390689	0.361463	0.241563	0.182621	0.227756	1.10704	1.05999	1.11449	0.267595	0.22457	0.267484	0.805499	0.905655	0.905017	0.340606	0.178776	0.185648
Pgam1	ENSMUSG00000011752	6.09427	6.06332	5.94342	5.561	5.53406	5.69704	6.16759	6.34214	6.35719	5.83288	6.31876	5.86034	6.06913	6.42758	5.96161	5.53439	5.84285	5.94045	6.68141	6.76731	6.75102	5.82136	5.94475	5.53558	6.444	6.75764	6.83018	5.63588	5.50404	5.61716	6.67295	6.7401	6.96051	5.7785	5.78913	5.92097	6.31492	6.43438	6.31146	6.00049	6.38731	6.24187	4.78845	5.26812	4.86292	6.01643	5.97947	6.17537
Evi5	ENSMUSG00000011831	4.79158	4.85898	4.8009	5.38406	4.68839	5.49447	4.53118	4.69427	4.70106	5.37274	5.43155	5.29361	4.62566	4.5287	4.50885	5.44687	5.33719	5.46772	4.32008	4.314	4.16787	5.45201	5.33194	5.15136	4.61552	4.64956	4.53534	5.4536	5.34633	5.32929	4.49824	4.43184	4.50722	5.35174	5.35576	5.26734	4.5265	4.53721	4.45081	4.28709	4.25407	4.09193	5.44822	5.32429	5.00591	4.23251	4.47305	4.18936
Evi5l	ENSMUSG00000011832	3.76734	3.48859	3.65484	3.98165	3.3808	3.79023	3.67808	3.57175	3.40073	3.84765	3.69787	3.89606	3.69596	3.76032	3.94885	3.88073	3.92284	3.84552	4.19925	4.06068	4.11412	4.74	4.62292	4.4194	4.11374	4.0797	4.04625	4.61231	4.42136	4.43673	4.24885	4.26406	4.15471	4.86399	4.64553	4.65329	3.90026	3.86397	3.78876	4.44902	4.36837	4.28669	5.08892	5.10257	5.01808	4.29848	4.43556	4.35142
Gltp	ENSMUSG00000011884	6.53072	6.65804	6.68899	5.58705	5.38169	5.45787	6.44352	6.45792	6.36506	5.34532	5.26935	5.25886	6.38509	6.33335	6.49047	5.08656	5.21952	5.30363	6.55399	6.44418	6.56741	5.43688	5.44422	5.38023	6.37217	6.49262	6.25661	5.47841	5.42755	5.37627	6.39438	6.36496	6.38598	5.41695	5.44458	5.31099	6.39536	6.41983	6.48574	6.44119	6.52861	6.51768	5.37779	5.35301	5.41221	6.38748	6.57934	6.63129
Scarf2	ENSMUSG00000012017	1.97586	1.73075	1.94466	4.88204	4.58919	4.80093	2.82848	2.58736	2.52734	4.7955	4.5808	4.58898	2.27741	2.13258	2.31491	4.6203	4.36989	4.27601	2.25245	2.588	2.80217	5.64451	5.7372	5.54531	2.25525	2.90549	2.62583	5.81606	5.63176	5.76006	2.06958	2.37761	2.28768	5.694	5.52616	5.60532	2.08624	2.26168	2.00317	2.27939	2.62367	2.17831	6.35072	6.3527	6.02823	1.7583	1.41018	1.95129
4930579F01Rik	ENSMUSG00000012042	0	0	0	0	0	0	0.0300305	0.0874247	0.190654	0	0	0	0.0600813	0.0443033	0	0	0	0	0.885524	0.822548	0.48625	0	0	0	1.22088	1.38946	1.20871	0	0	0	1.28178	0.93331	1.12498	0	0	0	0.678608	0.474032	0.477151	1.16472	1.63893	1.29408	0.0787914	0.0219933	0.0353355	1.79861	1.82113	1.77618
Brms1l	ENSMUSG00000012076	4.37214	4.45491	4.46721	5.21182	4.96898	5.33115	4.4876	4.58067	4.73823	5.24871	5.39608	5.34312	4.58398	4.54376	4.59755	5.11348	5.20842	5.38151	4.71758	4.62093	4.70781	5.50527	5.45286	5.34	4.81495	4.78221	4.78496	5.63151	5.37772	5.57157	4.81275	4.76989	4.81421	5.65026	5.54716	5.59891	4.45495	4.32382	4.268	4.73148	4.68399	4.60652	5.62045	5.65061	5.50866	4.82341	4.73854	4.6329
Aim1l	ENSMUSG00000012123	2.8552	2.81282	2.62158	1.12305	1.66873	0.867374	3.24035	2.37119	2.32307	1.15349	1.53284	1.06849	2.40973	2.54808	2.85387	1.40702	1.12308	1.14546	4.10563	3.80488	3.7653	1.08231	1.18288	0.756022	3.56879	3.59384	3.56509	0.994262	0.716336	1.15808	3.43924	3.19963	3.24721	0.22618	1.13542	0.554693	2.93878	3.07979	2.92659	4.70841	4.64666	4.75289	0.815011	0.82696	0.767346	4.02594	4.38398	4.29757
Ubxn11	ENSMUSG00000012126	1.67407	1.69318	1.97541	1.95749	2.48753	1.9486	2.17919	1.99393	1.79919	2.05519	1.99092	1.57393	1.86773	2.13074	2.06825	1.50375	1.69862	1.59318	1.80971	1.67126	1.70611	2.28386	2.42267	2.04793	2.07625	1.7097	2.0209	2.52435	2.10582	2.34817	1.90098	1.91731	2.36518	2.4276	2.10859	1.96043	2.05233	1.92953	2.14619	1.87595	2.03714	2.14759	2.47934	2.18047	2.56232	2.37974	1.68602	2.20032
Mogat1	ENSMUSG00000012187	2.12654	2.4979	2.03195	0.83726	1.95081	0.70679	0.83315	0.332058	0.363054	0.389207	0.644504	0.335926	0.844717	0.322344	0.605459	0.58328	0.335299	0.283774	0.1667	0.230989	0.216918	0.856183	1.29441	0.942349	0	0.167161	0.0634258	0.195114	0.1671	0.526232	0.260291	0.121218	0.146323	0.219157	0.159463	0.747684	2.17144	2.36025	2.18788	0.0531799	0.0537087	0	0.598322	0.867436	0.451809	0.15217	0.0540702	0.0620764
Ehf	ENSMUSG00000012350	0.273453	0.634029	0.361677	0	0	0.0423996	0.086762	0.0963561	0.029372	0	0	0	0.110145	0.13535	0.0364028	0	0	0	0.714067	0.646945	0.477927	0.0195762	0.0317719	0.00840093	0.555331	0.556588	0.398765	0	0	0.00935024	0.349032	0.281861	0.306466	0.19762	0.00965358	0	2.32713	1.94742	1.68582	0.673669	1.0365	0.812218	1.27199	1.53759	0.931433	0.792196	1.14968	0.917936
Nanog	ENSMUSG00000012396	0.678125	0.711083	0.69128	0	0	0.159886	0.649987	0.546312	0.727081	0.0215771	0.0832301	0.113424	1.02877	0.963151	0.791252	0	0	0	0.591076	0.747294	0.74863	0.1296	0.115589	0.159523	0.579329	0.46639	0.6942	0.162428	0.019724	0.0905615	0.296448	0.625305	0.434774	0.135772	0.0561236	0.170788	0.936754	0.791826	0.758632	0.542	0.363669	0.380087	0.241479	0.439978	0.525282	0.603562	0.597794	0.598826
Rpa3	ENSMUSG00000012483	6.59603	6.69045	6.68581	6.67914	6.93508	6.90257	6.62932	6.5612	6.82228	6.98471	6.92843	6.97097	6.44429	6.49443	6.38003	6.80725	6.934	7.30905	6.26319	6.22202	6.2145	6.29394	6.44634	6.44824	6.25205	6.36253	6.37195	6.50852	6.52049	6.70635	6.1866	6.32912	6.34257	6.56328	6.45382	6.76695	6.55947	6.53707	6.45582	5.97782	6.07387	5.9641	5.84636	6.03811	5.87953	6.24847	6.05558	6.11511
Lphn1	ENSMUSG00000013033	5.8898	5.94244	5.96391	5.40263	4.53902	5.51341	5.93652	5.99441	5.67903	5.98136	5.7298	5.66032	6.01403	5.88699	6.05835	5.20812	5.3478	5.37627	5.98507	6.032	6.03722	6.26181	6.27333	5.94072	6.15346	6.01131	5.92841	6.32785	6.10283	6.19028	6.22497	6.16347	6.01983	6.14435	6.37216	6.06878	6.12006	6.06231	5.98628	6.07324	6.02334	6.02301	6.80653	6.68709	6.69643	6.21028	5.98989	5.91792
Amotl1	ENSMUSG00000013076	5.39897	5.42565	5.43174	5.72714	4.98325	5.74134	5.98038	6.07071	5.89972	5.43157	5.43694	5.41955	6.04748	6.0607	6.09989	5.6272	5.64631	5.59551	6.16905	6.15934	6.06632	5.93812	5.91392	5.79872	6.43034	6.44784	6.32439	5.77902	5.70129	5.7142	6.29056	6.32989	6.22961	5.73052	5.94738	5.71995	5.3722	5.45047	5.39062	5.93915	5.94738	5.83614	5.73222	5.61704	5.36434	5.9692	6.07032	6.0096
Etv5	ENSMUSG00000013089	5.98921	6.15601	6.03344	5.95185	5.52419	5.85608	5.26681	5.33765	5.15587	5.11058	5.20909	5.06532	5.62285	5.68991	5.62042	5.40073	5.31581	5.35648	4.95866	4.73631	4.88021	5.35493	5.4237	5.474	4.42339	4.41384	4.23843	4.85365	4.676	4.73924	5.55291	5.56577	5.73125	4.51557	4.59735	4.71176	5.65926	5.69261	5.72357	5.07309	5.05847	5.25197	4.49374	4.63208	4.44723	3.99968	3.79542	3.97609
Atp6v0d1	ENSMUSG00000013160	5.881	5.79461	5.83053	5.5723	5.87874	5.61441	5.4451	5.32016	5.17113	5.54605	5.44771	5.49936	5.55406	5.56001	5.49304	5.52771	5.57244	5.47257	5.96299	5.76249	5.90185	6.14137	6.17308	6.03902	5.60703	5.59561	5.6806	5.90463	5.74016	5.81033	5.80686	5.76801	5.83201	6.09644	5.8689	5.97285	6.39744	6.27984	6.28814	5.87768	5.88503	6.02946	5.96149	6.17771	6.27068	5.59873	5.79333	5.77499
Ptprs	ENSMUSG00000013236	5.82959	5.65988	5.6671	5.89543	5.0435	5.73097	5.86485	5.73398	5.47751	5.73787	5.75831	5.55366	5.78011	5.86483	5.86964	5.92445	5.7925	5.69032	5.9502	5.8704	5.98328	6.74913	6.69102	6.51379	5.98399	6.12334	6.07219	6.57746	6.46388	6.3837	6.05753	6.10961	6.07889	6.63251	6.75275	6.53612	6.06255	6.0197	5.98202	5.5903	5.81154	5.82675	6.72684	6.81972	6.86495	5.73722	5.67131	5.89898
Iglon5	ENSMUSG00000013367	4.09557	4.04166	3.96009	4.13661	3.76528	3.98169	3.31907	3.19774	3.07069	3.72882	3.66086	3.59309	3.5168	3.52619	3.75987	3.76512	3.47137	3.54918	3.72498	3.68681	3.83165	5.36017	5.35677	5.2253	3.27085	3.38307	3.28267	4.9456	4.80565	4.81668	3.58952	3.70056	3.67196	5.0842	5.11392	5.04061	4.26648	4.32178	4.21293	3.45081	3.429	3.41265	5.62893	5.4671	5.71316	3.2091	3.23767	3.38987
Igf2bp1	ENSMUSG00000013415	6.37404	6.45644	6.3911	6.53632	6.10201	6.5373	6.48285	6.48704	6.17925	6.67907	6.70981	6.53575	6.40467	6.47126	6.3185	6.77476	6.5826	6.47328	6.28144	6.30945	6.29851	6.03025	6.07265	6.02991	6.10536	6.1377	6.16764	6.09561	6.0477	6.12355	6.1679	6.2485	6.20186	5.98897	6.3035	6.10138	5.81413	5.93804	5.91841	5.38645	5.39916	5.51929	4.95422	5.06827	4.99543	5.47714	5.27584	5.47469
Zfp651	ENSMUSG00000013419	3.3455	3.20964	3.35526	2.37099	1.79195	2.29445	3.60227	3.44838	3.17283	2.60574	2.45416	2.5451	3.29868	3.16622	3.4775	2.64897	2.37072	2.36427	3.68328	3.61396	3.72414	3.35905	3.42355	3.07191	3.87587	3.8654	3.77842	3.64159	3.44336	3.48349	3.80748	3.78261	3.73961	3.39687	3.29264	3.3471	3.77318	3.73081	3.63245	3.41586	3.46887	3.28674	3.78347	3.93797	3.67146	3.5251	3.54733	3.5584
Card14	ENSMUSG00000013483	0.163975	0.169692	0.135914	0.0252232	0	0	0.292458	0.300307	0.296276	0.0650801	0.092478	0.0179914	0.387441	0.187602	0.235016	0	0	0.0124365	2.17677	1.99413	2.01394	0.0544305	0.0505713	0.0889848	1.73492	1.56611	1.38135	0.16583	0.0360655	0.223135	1.5537	1.59994	1.52002	0.0793494	0.0642241	0.107113	0.692774	0.658406	0.508066	2.03989	2.08501	2.15108	0.116449	0.125951	0.151986	2.05196	2.20114	2.10613
Tmem175	ENSMUSG00000013495	3.35614	3.30182	3.35127	2.98567	2.82298	2.89281	3.34722	3.28051	3.12237	2.83343	2.75476	2.95169	3.5722	3.22406	3.35015	2.40478	2.6748	2.8318	3.59457	3.67227	3.75549	3.31979	3.36379	3.1591	3.678	3.68727	3.60404	3.37713	3.25084	3.43325	3.81314	3.86639	3.8274	3.49695	3.41995	3.43857	3.75114	3.71745	3.69902	3.96541	3.8349	3.85952	3.6407	3.39029	3.64792	3.96759	3.89149	3.91946
Bcas1	ENSMUSG00000013523	1.51411	1.24455	1.44307	0.817982	1.73001	0.487496	2.12352	2.21848	2.10164	1.298	1.10617	1.1075	1.98287	1.99593	2.1164	0.844965	0.911608	1.05111	1.9288	1.67051	1.98785	0.810279	0.693954	0.942972	1.78381	1.80237	2.09831	0.929703	0.68542	0.555542	1.89653	2.11459	2.25721	0.991008	0.791001	0.353202	0.849208	0.761372	1.34265	1.76596	1.62521	1.84213	1.21838	1.43238	1.27544	1.21639	1.49129	1.41935
Aldh1a2	ENSMUSG00000013584	0.113152	0.0481904	0.0299956	0.849857	0.50228	0.756068	0.134695	0.034578	0.165278	2.93674	2.90966	2.92898	0	0.0341836	0.168976	2.01381	1.96089	2.2402	0.173328	0.0897335	0.190979	4.08634	3.70648	3.57244	0.328553	0.173286	0.259116	5.64585	5.12012	5.04588	0.183784	0.666104	0.204285	6.32377	6.01828	5.73887	2.95936	3.02155	1.46298	0.212933	0.240891	0.383747	4.64494	5.2651	4.52139	0.212988	0.200587	0.17878
Snx31	ENSMUSG00000013611	0.358835	0.364494	0.428199	0.98769	0.537406	0.395302	1.10723	0.922534	1.06127	2.00168	1.8969	2.07926	1.07073	0.803149	0.974302	0.19127	0.320121	0.644772	3.53068	3.43714	3.63965	0.254001	0.127558	0.205864	2.97684	2.87254	2.78404	0.813395	0.636203	0.464425	3.22677	3.11342	3.17547	0.331837	0.344122	0.300608	1.33826	1.31228	1.11921	3.42832	3.33453	3.43001	0.188667	0.310653	0.397807	2.71691	2.97736	3.21588
Atraid	ENSMUSG00000013622	5.22985	5.13197	5.05989	4.71222	5.1398	4.77951	4.89054	4.93901	4.89776	4.91969	5.07183	4.92199	4.94354	4.88956	4.91586	4.72675	4.92846	5.17896	5.08289	4.88061	5.15058	5.29974	5.22722	5.03696	5.14969	5.06529	5.15614	5.42676	5.07926	5.32836	4.99741	4.88031	5.1171	5.61299	5.30406	5.36454	5.64868	5.50296	5.53555	5.33767	5.30066	5.44515	5.80405	5.94565	6.00347	5.47046	5.49245	5.41262
Cad	ENSMUSG00000013629	6.03542	5.97407	5.60275	6.10334	4.90874	5.69892	5.87375	5.71772	5.22541	5.95938	5.93712	5.5867	5.58475	5.45264	5.56642	6.30802	5.95781	5.57078	5.21791	5.30002	5.44376	5.2588	5.41179	5.29812	5.34903	5.3621	5.17761	5.34386	5.21078	5.4265	5.34357	5.41526	5.29989	5.08725	5.58047	5.38217	5.29712	5.51622	5.32325	5.09402	5.24226	5.47976	4.79803	5.14594	5.19951	5.16308	5.0262	5.48329
Pea15a	ENSMUSG00000013698	6.80263	6.87833	6.90627	5.90137	5.92342	5.98665	6.05437	6.08883	6.04009	5.97078	5.75219	5.85686	6.39295	6.31223	6.4251	6.09128	5.89352	5.97276	4.74965	4.68165	4.97129	5.8843	5.95066	5.79933	4.98894	5.12418	5.04165	5.91532	5.89415	5.78175	4.8626	5.09334	5.16339	5.6741	5.58524	5.5808	6.68821	6.72879	6.6708	4.24397	4.16388	4.18026	6.09983	6.1637	6.06416	4.31526	4.48151	4.32693
Timm23	ENSMUSG00000013701	7.02008	6.83872	6.77452	6.99466	6.38522	6.84972	6.95293	6.82986	6.68787	6.98679	7.16357	6.87601	6.68001	6.53904	6.64264	7.16986	6.80966	6.82796	6.18148	5.87972	6.22055	5.93384	6.2578	6.03642	6.08997	6.07496	6.13109	6.12319	6.01625	6.1624	6.04048	6.16956	6.36669	6.01183	5.82137	6.06115	6.0241	6.1707	6.01673	6.43564	6.44067	6.03541	5.8691	6.18507	5.56699	6.42148	6.4081	6.37084
Tnfaip8l2	ENSMUSG00000013707	0	0.0690189	0.124841	1.31268	1.14529	1.06272	0	0	0	0.509028	0.842726	0.620874	0.157037	0.071497	0.0339025	1.55444	0.910211	1.07493	0.138873	0.291179	0.0389154	1.00204	1.10244	0.827336	0.10209	0.183305	0.193101	0.819906	0.958863	0.97543	0.0629129	0	0.113441	0.830621	0.851262	0.689186	0.372017	0.51686	0.213524	0.066661	0.19152	0.23416	0.690339	0.784378	0.605945	0.0361795	0	0.149564
Ly6g6e	ENSMUSG00000013766	1.04006	1.10949	0.906272	0	0.44251	0	2.87366	2.86115	2.43458	0.228412	0.137224	0	2.67498	2.80732	2.85788	0	0	0.0384113	2.93447	2.78624	2.78199	0.071722	0.10976	0.21753	3.46209	3.44076	3.24907	0.277463	0.143166	0.212867	3.34151	3.06706	2.94687	0.0751206	0.117243	0.237046	1.30886	1.62057	1.4233	4.06927	4.18176	4.30002	0.250514	0.103466	0.380053	4.60114	4.344	4.31046
St3gal1	ENSMUSG00000013846	2.36924	2.46276	2.44008	3.88227	3.51893	3.94329	2.64443	2.73322	2.62475	3.67578	3.6382	3.67349	2.49348	2.67374	2.58237	3.34799	3.37649	3.49137	1.62897	1.64039	1.59567	4.09734	3.95269	3.84126	2.19701	2.18307	2.1316	4.18007	4.04818	3.95462	2.04729	1.93874	1.81271	3.51608	3.46652	3.26095	3.38002	3.33934	3.16943	1.83875	2.06587	2.0157	3.86272	3.92733	3.96149	2.13345	2.23522	2.12401
Clip3	ENSMUSG00000013921	7.34363	7.48205	7.2945	7.56538	6.75794	7.34298	7.1351	7.06854	6.79021	7.555	7.68306	7.51872	7.28687	7.33704	7.5648	7.15465	7.29583	7.42566	6.95841	7.06851	7.01251	7.77188	7.71713	7.55513	7.06555	7.03234	6.85732	7.7212	7.40848	7.61937	7.1225	6.98124	7.05707	7.70006	7.77993	7.65908	7.37684	7.30526	7.27165	6.74821	6.90982	6.97365	8.17924	7.96795	8.21574	6.63614	6.76029	6.91657
Trpv4	ENSMUSG00000014158	1.07128	1.09309	0.888172	0.252646	0.0516491	0.290415	1.27407	1.04547	1.08172	0.256257	0.258707	0.124817	1.17839	1.15168	1.38663	0.62807	0.482712	0.279746	1.90843	2.15329	2.16225	0.702378	0.706167	0.465859	1.49965	1.59665	1.32839	0.692806	0.7171	0.377054	1.83134	1.73051	1.75847	0.804594	0.823061	0.741358	1.30383	1.27012	1.29781	2.2047	2.22091	2.34113	2.08169	2.29618	2.22305	1.85182	1.77861	2.0281
Klhl3	ENSMUSG00000014164	1.05238	0.894452	0.940844	0.715735	0.333231	0.544174	1.06443	1.05567	0.967728	0.874741	0.918418	0.84335	0.859375	0.99232	0.841856	0.531714	0.700683	0.59075	1.18495	1.04419	1.05757	1.26122	1.27914	1.16215	1.03317	0.893058	1.01712	0.952328	0.971063	0.796819	1.09981	0.958072	0.929975	0.829194	0.959118	0.820892	1.40024	1.30697	1.35264	0.97246	1.10229	1.15629	1.1279	1.04669	0.91097	0.897053	1.07551	0.91128
Zfp385c	ENSMUSG00000014198	2.77743	2.63771	2.49392	0.226317	0.0700878	0.0522583	3.31636	3.29784	3.06788	0.255485	0.0429004	0.0748512	3.76453	3.70259	3.78562	0	0.425512	0	4.04341	3.88213	3.85973	0.636955	0.447509	0.318306	4.72256	4.58003	4.50028	0.302319	0.470456	0.500178	4.70695	4.53399	4.63178	0.831631	0.329302	0.274296	4.18247	4.10419	4.14873	4.08286	4.63952	4.47916	1.07997	0.865664	1.01781	5.04547	4.40027	4.55531
Cacybp	ENSMUSG00000014226	7.34631	7.55966	7.52477	8.07759	8.46159	8.24881	7.28354	7.45061	7.74087	8.09518	8.26401	8.21683	7.29779	7.30737	7.24426	8.2128	8.18079	8.42924	6.92303	6.8118	6.85297	7.0858	7.14621	7.1139	7.05915	7.04388	7.04371	7.26245	7.28884	7.34185	7.04007	6.99813	7.05016	7.20774	7.0582	7.33341	7.13462	7.06498	7.06238	7.04371	7.06337	6.94461	6.91986	6.94626	6.92023	7.17331	7.16163	7.00543
Cluap1	ENSMUSG00000014232	4.09324	4.07493	3.91193	4.24121	4.38893	4.17541	4.00477	3.88972	4.10091	4.18	4.08599	4.24602	3.72988	3.88377	3.88894	4.55822	4.18893	4.17546	4.1822	4.01205	4.01386	4.59521	4.52822	4.14629	4.29065	4.28214	4.2803	4.65272	4.36321	4.60661	4.30617	4.28947	4.22065	4.77282	4.60348	4.73877	4.43194	4.35368	4.31018	4.16989	4.36962	4.35764	4.63291	4.71433	4.86391	4.45862	4.50956	4.46283
Zswim7	ENSMUSG00000014243	2.94576	3.32351	3.16118	3.9256	4.3473	3.75722	3.41071	2.99958	3.2079	3.56177	3.6613	3.49294	3.32132	3.15873	3.30193	3.51113	3.53223	3.78091	3.14528	3.18289	3.47494	4.20762	4.1807	4.12672	3.50603	3.35207	3.40957	4.01181	3.94951	3.94902	3.44749	3.49131	3.36692	4.13006	3.93294	3.9288	3.57465	3.58312	3.59234	2.96617	3.07259	3.06211	3.76362	3.94164	3.88951	3.01921	3.03914	3.03652
Pam16	ENSMUSG00000014301	1.84948	1.82134	2.26835	1.40861	2.30583	2.16704	1.81094	1.77486	1.08438	1.73026	1.40855	1.81852	1.33079	1.32095	1.33655	1.19207	1.36891	1.62997	2.22512	1.91133	2.09058	2.26554	2.12269	2.10652	1.91966	1.87186	1.9266	2.26487	2.43565	2.41895	2.24436	2.08623	2.11425	2.0345	2.1147	2.40195	2.35398	1.65162	2.10249	1.9091	2.04887	2.29611	1.70254	2.02302	1.98565	2.145	1.61346	2.49751
Glis2	ENSMUSG00000014303	5.40032	5.40639	5.54283	5.39424	4.65067	5.2831	5.64182	5.42731	5.17055	5.15765	4.87763	4.96491	5.41691	5.23251	5.6031	5.12068	5.13221	4.8816	5.69356	5.63367	5.8412	5.04281	5.06174	4.7746	5.5297	5.47747	5.42886	5.11666	4.91789	5.00739	5.50098	5.47029	5.46281	4.99154	4.97774	4.84078	5.23302	5.20148	5.15625	5.17018	5.12728	5.02903	5.03533	5.03387	5.05229	4.91534	4.84196	4.89008
Cox6c	ENSMUSG00000014313	8.59572	8.47181	8.36741	8.66421	9.32385	8.97679	8.8902	8.68557	8.74382	8.79571	9.00153	8.77651	8.38324	8.593	8.42451	9.40428	8.94587	9.18373	8.76653	8.63717	8.66566	8.63597	8.84048	8.65864	8.62227	8.5753	8.88508	8.63431	8.60611	8.67414	8.73316	8.72218	8.87749	8.94919	8.7508	9.01346	8.48894	8.42897	8.2795	8.48549	8.57107	8.56143	8.1988	8.32891	8.31379	8.71344	8.54342	8.46238
Bicc1	ENSMUSG00000014329	2.15676	2.208	2.20198	3.1604	2.42126	3.12764	2.35541	2.39502	2.28896	3.482	3.50018	3.35316	2.12255	2.06758	2.10449	3.02409	3.03348	3.03399	2.31996	2.46463	2.43826	4.14861	4.08984	3.91548	2.22337	2.32651	2.19907	4.47898	4.2531	4.18557	2.15288	2.14006	2.0441	3.85411	3.8553	3.61144	2.22687	2.2793	2.04711	2.05183	2.07626	1.9096	5.06757	5.06629	4.86854	1.7197	1.82632	1.62501
Anapc1	ENSMUSG00000014355	6.53274	6.71953	6.56973	7.04621	6.48597	6.97288	6.55157	6.55049	6.52289	6.747	6.80327	6.7208	6.40828	6.51323	6.54223	6.81301	6.95505	6.87991	6.022	6.22813	5.97089	6.36715	6.28325	6.15959	6.01321	6.03055	5.95587	6.22467	6.21982	6.19225	5.89727	6.03613	5.95733	6.12579	6.5174	6.20276	6.03156	5.97831	5.95338	6.10515	6.11254	6.25479	6.3662	6.15249	6.42289	5.98246	6.03411	6.11193
Mertk	ENSMUSG00000014361	2.94783	3.00164	3.10122	3.86577	3.51898	3.76868	2.75828	2.87859	2.79539	3.64402	3.71498	3.78144	2.23943	2.41919	2.31882	3.48801	3.90756	3.98022	2.81969	2.9123	3.00564	4.3759	4.2252	3.95291	2.61791	2.67646	2.63452	3.88914	3.75066	3.85232	2.24123	2.24522	2.16998	3.81667	3.89907	3.73737	2.81349	2.90446	2.85312	2.55954	2.67799	2.56996	4.19842	4.15722	4.32991	2.59353	2.37551	2.63124
Piezo1	ENSMUSG00000014444	4.12154	4.05798	3.97766	4.10605	3.95035	3.63023	4.66336	4.59842	4.21911	3.69218	3.55339	3.45306	4.18435	4.03816	4.20239	4.05075	3.69075	3.54551	4.52242	4.71593	4.6105	3.81635	3.90763	3.59316	4.4472	4.48324	4.35035	4.19341	3.95532	3.8697	4.25195	4.41609	4.37133	3.83807	3.68054	3.45486	3.79165	3.8823	4.08175	4.72406	4.72984	4.88136	4.0675	4.13745	4.41756	4.73923	4.4611	4.7379
Ankrd28	ENSMUSG00000014496	4.91786	5.09565	5.00668	4.70509	4.15346	4.77417	5.04196	5.11215	5.15451	4.40385	4.47009	4.41285	4.69886	4.81626	4.64666	4.33519	4.52574	4.5612	4.95019	5.0194	5.10884	4.56031	4.52517	4.5423	4.91699	4.93156	5.01838	4.34305	4.31375	4.42143	4.80073	4.84714	4.82698	4.37787	4.44067	4.40494	4.97005	4.95594	4.89919	4.54445	4.34745	4.29859	4.22508	4.23173	3.96148	4.46759	4.47161	4.18958
Wdfy2	ENSMUSG00000014547	4.1937	4.27656	4.20454	4.04179	2.14192	4.26179	3.94579	4.15936	3.85903	3.58921	3.74503	3.55107	3.96652	4.12228	4.05249	3.79896	3.7848	3.84591	3.89026	3.92818	3.92486	3.82697	3.7957	3.73763	3.86751	3.96067	3.76192	3.5723	3.35751	3.40203	3.94938	3.92585	3.82495	3.69169	3.81752	3.52098	4.23786	4.24765	3.94154	3.34812	3.15484	2.95256	3.45565	3.38571	2.70532	3.04182	3.10123	2.90918
Csf1	ENSMUSG00000014599	1.32906	1.57331	1.38951	2.16475	1.44821	1.76387	2.58471	2.69034	2.67433	1.75634	1.3804	1.92993	2.04525	2.41675	2.56098	2.34281	1.39894	1.6279	1.88928	1.84316	1.85517	2.27694	2.21606	2.01579	1.79213	1.88743	1.92526	2.28725	2.24576	2.02227	1.68219	1.82277	1.59374	2.05993	1.87068	1.85001	1.55022	1.40579	1.38815	2.03823	1.88357	2.14504	2.85145	2.85774	3.09517	1.97724	1.86855	1.81563
Kif1a	ENSMUSG00000014602	3.38562	3.32435	3.25728	1.75593	1.20534	1.84552	3.75824	3.84488	3.4684	1.24044	1.17037	1.1734	2.83085	3.09809	3.14879	1.79033	1.56155	1.43931	2.71926	2.63125	2.75233	2.62418	2.34181	2.28526	3.01377	3.14631	3.03467	2.50818	2.22305	2.18228	2.54878	2.55175	2.58806	2.39699	2.42506	2.18471	4.34175	4.36349	4.06253	1.88488	2.36505	2.19025	3.28687	3.22824	3.19471	2.6478	2.58135	2.71854
Alx3	ENSMUSG00000014603	1.78299	2.34562	2.58448	8.34231	8.44962	8.40109	0.897814	0.592623	0.816786	5.69497	5.57278	5.47859	0.775084	0.572127	0.772746	4.29959	4.19957	4.39794	0.585352	0.775098	0.576647	7.18259	7.40351	7.2537	1.41169	3.27287	3.1775	6.41872	6.20746	6.60213	0.345107	0.305409	0.554487	3.84544	3.40359	4.1334	2.8594	3.18316	1.99607	0.27412	0.587352	0.637195	6.52388	6.41198	6.40668	0.983228	0.117137	0.112432
Cmc2	ENSMUSG00000014633	5.02883	4.86571	4.88887	5.2733	5.90833	5.3948	4.60792	4.70615	4.57114	5.15097	4.97635	5.09567	4.53654	4.49294	4.68418	5.23667	5.20064	4.82479	4.52616	4.46485	4.57386	5.23355	5.26971	5.11639	4.55299	4.80179	4.49181	5.22649	4.97569	5.10745	4.80733	4.77861	4.72191	5.16461	4.99882	5.21617	4.79877	4.79398	4.8212	4.74065	4.99368	4.64815	5.02166	5.26559	5.04297	4.86434	4.95128	4.99467
Chfr	ENSMUSG00000014668	5.20829	5.25385	5.26085	4.85133	4.37912	4.80792	5.21831	5.18906	5.21209	4.59803	4.61196	4.52496	5.07635	5.18816	5.19035	4.76159	4.92486	4.93791	5.38164	5.2548	5.29394	4.55238	4.62472	4.4244	5.39339	5.31118	5.23899	4.08992	3.96577	3.99405	5.37689	5.32545	5.31316	4.41735	4.32133	4.37251	5.64158	5.55869	5.45457	5.24548	5.22918	5.17548	4.15436	4.25351	4.09268	5.20318	5.26475	5.1536
Hoxa2	ENSMUSG00000014704	0.0264314	0	0	0	0	0	0.119083	0.110861	0.292481	0	0.144181	0.0647882	0	0	0.0424869	0	0	0	0.150978	0.0974385	0.0953499	0	0.0238769	0	0.755521	0.591874	0.732656	0.549906	0.554541	0.365946	0.339037	0.250401	0.184105	0	0.0225425	0	0	0.0404237	0	0.123834	0.255594	0.133749	0.0205526	0	0	0.700954	1.26756	1.07182
Adam28	ENSMUSG00000014725	0.221637	0.275553	0.124564	0	0	0	0.198324	0.300152	0.215338	0	0	0	0.325592	0.479657	0.324907	0	0	0	0.0689511	0.0520505	0.0509056	0	0	0	0.321413	0.49409	0.347672	0	0	0	0.131446	0.0258723	0.123467	0	0.0119202	0.0126517	0.386719	0.450837	0.396327	0.0560459	0.0558301	0.041767	0.0109275	0.0237998	0.0192604	0.0697954	0.0994933	0.0643291
Dll1	ENSMUSG00000014773	4.03567	3.91419	3.8284	0.951009	0.4613	0.662523	2.51188	2.2124	2.18363	0.757166	0.631592	1.00043	2.46075	2.4453	1.92973	1.2968	1.20136	1.10581	2.36284	2.24915	2.60094	0.379713	0.295548	0.312292	2.12018	2.17613	2.07739	1.45008	1.52172	0.998451	2.10876	1.71936	1.69963	0.619321	0.575236	0.317444	2.79359	2.93597	3.0867	2.10149	2.31501	1.95283	0.984538	1.36456	0.965837	1.79731	2.40913	2.25397
Nol3	ENSMUSG00000014776	0.237845	0.265136	0.197401	0.335979	0.0554949	0.174374	0.0536708	0.0400687	0.190457	0.0715264	0.0424636	0.12195	0.0480866	0.128176	0.0976926	0.0546951	0.257466	0.263452	0.15932	0.308565	0.136965	0.582562	0.545151	0.414459	0.292829	0.271864	0.204471	0.660381	0.586754	0.47927	0.185945	0.363173	0.19801	0.799973	0.723601	0.706103	0.595414	0.55491	0.57629	0.378371	0.535428	0.371234	1.14296	1.14708	1.2092	0.51349	0.557725	0.39763
Fhod1	ENSMUSG00000014778	1.86123	1.88452	1.99763	3.53151	3.38423	3.32797	2.09089	2.23996	1.59371	3.55421	3.72469	3.63373	2.19723	2.21886	2.26026	3.64157	3.67767	3.51081	1.3137	1.46683	1.39117	3.83539	3.95222	3.79922	1.27216	1.29976	1.18014	3.58574	3.60784	3.51514	0.949896	1.26778	1.15849	3.70076	3.78366	3.56069	1.64327	1.99371	1.78653	1.42846	0.968345	1.16326	3.86743	3.97177	4.23299	0.995598	0.577312	0.920777
Plekhg4	ENSMUSG00000014782	0.186844	0.231099	0.277487	1.58902	1.6371	1.1875	0.279572	0.145661	0.202516	1.37171	1.16113	1.46011	0.360001	0.154194	0.0988498	1.60795	1.59488	1.58651	0.109221	0.111564	0.104183	1.55592	1.4661	1.11311	0.0796011	0.153672	0.131442	0.877824	1.16711	1.21908	0.0875799	0.105087	0.0818698	1.53553	1.31208	1.30367	0.0634701	0.147105	0.112324	0.091493	0.0920404	0.174634	1.31158	0.904553	1.35484	0.123056	0.0261833	0.0802175
Slc9a5	ENSMUSG00000014786	1.12907	1.12312	1.03427	3.12584	3.0991	3.11408	1.08244	0.999449	0.858387	2.97815	2.94198	3.02082	1.15495	1.20361	1.18336	3.3087	3.23369	3.0853	0.591315	0.465609	0.598464	3.44987	3.33511	3.22752	0.396596	0.672215	0.528988	3.19711	3.04682	3.22623	0.525607	0.623744	0.668545	3.50401	3.34856	3.21185	0.898137	0.920026	0.777646	0.46192	0.421044	0.467988	3.70447	3.58037	3.76227	0.320694	0.198542	0.128284
Elmo3	ENSMUSG00000014791	2.9438	2.74762	2.70378	0.802017	0.903098	0.565373	3.39485	3.15866	2.9907	0.759339	0.568499	0.547088	3.14437	3.08663	3.15767	0.589941	0.546006	0.513371	3.52935	3.46896	3.60456	0.849685	0.99799	0.782022	3.32065	3.27389	3.23182	0.744452	0.653176	0.740281	3.13551	3.23581	3.17584	0.672838	0.584733	0.577936	3.18589	3.2274	3.18314	3.41348	3.47099	3.5404	0.924675	1.10506	1.13202	3.30484	3.40677	3.44309
Stc1	ENSMUSG00000014813	2.24518	2.50392	2.3975	1.38522	1.40376	1.6019	2.03812	2.32559	2.24559	1.59266	1.6653	1.74653	2.53617	2.64591	2.65886	1.8352	1.85955	1.64185	1.45419	1.49985	1.18669	2.12949	1.91729	1.85473	1.86152	1.89964	1.77314	2.17098	1.79686	1.98387	2.16491	1.92216	1.83383	2.00838	1.94631	1.79096	3.04549	2.97635	2.79687	2.13525	2.51571	2.31721	2.40554	2.41823	2.52208	2.3092	2.98606	2.73407
4931428F04Rik	ENSMUSG00000014837	4.37909	4.24955	4.08628	4.01901	3.87493	4.04176	4.10109	3.93382	3.79615	3.89696	3.91699	3.80761	4.04123	4.09493	4.16629	3.86815	3.94982	3.71577	4.15971	4.11576	4.19717	4.77344	4.763	4.63187	4.18054	4.12324	4.14436	4.64229	4.47034	4.53252	4.2474	4.28156	4.22592	4.78496	4.63168	4.64207	4.52196	4.52488	4.53756	4.00674	4.05644	4.14435	4.82342	4.85288	5.03662	4.02443	3.90028	3.97252
Tppp3	ENSMUSG00000014846	3.3628	3.27853	3.46002	3.2611	3.63734	3.3044	1.16709	0.99312	0.84583	2.59255	2.42558	2.19144	1.3352	1.33399	1.19775	3.24693	3.38773	2.88813	1.63522	1.97673	2.1082	3.06717	3.05931	3.08679	0.877636	1.1936	1.56258	3.49085	3.38207	3.06216	1.196	1.34195	1.10397	2.67796	2.38286	2.47225	5.65879	5.59513	5.39929	1.66672	1.65899	1.47947	2.86758	3.46899	3.40272	1.42444	1.16363	1.42284
Naf1	ENSMUSG00000014907	4.6164	4.67246	4.50043	4.335	4.46398	4.41619	4.4159	4.43441	4.67232	4.31388	4.43214	4.41151	4.48604	4.47281	4.48574	4.53917	4.60036	4.59862	4.11709	4.25561	4.41504	3.7965	3.70899	3.6912	4.349	4.64959	4.52033	3.94559	3.80656	3.97642	4.45418	4.46577	4.4765	4.06091	4.11533	4.12874	4.39992	4.52315	4.48172	4.17756	4.2257	4.07962	3.53284	3.5964	3.44827	4.12286	4.05802	4.28672
Galns	ENSMUSG00000015027	2.7555	2.73558	2.68868	2.04859	2.32845	1.97597	3.25865	3.14307	3.00815	2.04616	2.11624	1.78385	2.90046	2.87385	2.73691	1.34493	1.80649	1.46245	2.68242	2.5695	2.70421	2.5436	2.47039	2.41876	2.59228	2.57076	2.76	2.51234	2.25808	2.29114	2.60007	2.58585	2.74244	2.36757	2.0539	2.19385	2.70141	2.71436	2.67006	2.53677	2.49726	2.63242	2.56478	2.49593	2.71522	2.5348	2.69715	2.70232
Gata2	ENSMUSG00000015053	1.62057	1.79151	2.0604	6.22877	5.96228	6.20907	2.37262	2.2717	2.23354	2.83886	2.99426	3.01085	1.60317	1.49992	1.65738	4.25673	4.26433	4.30685	1.61784	1.48109	2.26936	7.10347	7.20495	6.94626	0.982563	0.973275	1.0378	2.02959	1.95379	1.98078	1.68614	1.39494	1.64416	3.84617	3.59084	3.84738	2.21773	2.63051	1.45007	2.19429	1.57272	1.84437	7.23691	7.34403	7.17513	0.545782	0.802072	0.544997
C8g	ENSMUSG00000015083	1.31868	1.05008	1.3298	0.90711	1.56404	0.918931	1.43853	1.30854	1.55905	1.26995	0.944195	1.13725	1.33753	1.5604	1.74832	1.86034	1.16033	1.8131	0.998335	1.1705	1.28831	1.36395	1.43188	1.40738	1.16949	1.12484	1.13986	1.42383	1.3252	1.55389	1.25762	1.431	1.32847	1.36595	1.58696	1.50511	1.49811	1.82489	1.62204	1.06897	1.07619	1.0353	0.991459	1.23731	1.25716	1.11991	1.05351	1.22179
Ptgds	ENSMUSG00000015090	0	0	0.0641517	0	0	0	0.097376	0.0737473	0	0	0	0	0.0649725	0.0927097	0	0	0	0	0.112006	0.0804044	0	0.0741175	0	0	0	0	0.0334632	0.0707292	0.0796767	0	0.0642492	0	0	0	0	0	0.0702639	0	0.0649262	1.28979	1.4319	1.16037	0	0.0701244	0.15774	0.0711413	0.0668193	0.218868
Clic3	ENSMUSG00000015093	0.204939	0	0.0504461	0	0	0	0.152961	0.130232	0.0643208	0	0	0	0.114394	0.34966	0.118264	0	0	0	1.83639	1.46486	1.66578	0	0.0649724	0	1.41908	1.39906	1.33811	0.0627202	0	0	1.05659	1.15257	0.988844	0	0.0626078	0	0.293966	0.353726	0.34743	3.10533	2.81324	2.95529	0.0563009	0	0	2.60434	2.76707	2.5792
Npdc1	ENSMUSG00000015094	4.99633	4.79882	4.84279	2.95398	3.56298	3.02905	3.81207	3.4212	3.16141	2.71631	2.17367	2.23643	4.09743	3.97025	4.22076	2.91012	2.39865	2.53806	4.23843	4.27789	4.61392	3.17018	3.20623	2.81429	3.62807	3.64251	3.55536	3.39394	3.06291	3.03558	4.18345	4.31673	4.0378	2.91464	2.81407	2.55664	5.52202	5.40698	5.36291	4.84901	4.88091	4.98787	4.06675	4.26147	4.10278	4.25657	4.01573	4.35709
Slc25a13	ENSMUSG00000015112	5.87034	6.07336	6.01519	5.02728	5.12454	5.12148	5.66974	5.73015	5.81291	5.70386	5.75822	5.68405	5.59976	5.74751	5.57034	5.58743	5.6765	5.66996	4.99916	4.91495	4.98774	4.2791	4.29269	4.3604	4.99185	5.01765	5.09958	4.25179	4.23479	4.36416	4.92692	4.83707	5.0107	4.19046	4.27627	4.46473	5.53852	5.53096	5.47972	4.89508	4.80764	4.89178	3.49668	3.70751	3.60311	4.9767	4.95442	4.92639
Lrrk1	ENSMUSG00000015133	4.65615	4.46658	4.37308	2.0227	2.09418	2.2207	4.71437	4.46317	4.37201	2.59394	2.53363	2.69401	4.47181	4.39686	4.65496	2.40025	2.68176	2.97805	5.07832	4.97077	5.1295	2.62546	3.00027	2.85159	5.0362	4.99188	5.14136	2.91749	2.36887	2.52311	4.92381	4.77628	4.93237	2.37794	2.68635	2.51663	4.49205	4.45342	4.63969	4.75688	4.87332	4.95457	2.92858	3.09793	3.22173	4.59299	4.5479	4.72653
Aldh1a3	ENSMUSG00000015134	9.17239	9.35561	9.18181	0.621364	0.323222	1.93284	1.5107	1.72548	1.55156	0.224531	0.300062	0.177516	6.10871	6.57003	6.38146	0.780932	0.877467	0.987562	4.82485	4.47652	5.30215	2.21287	2.12395	2.06715	1.03268	1.155	0.886273	1.72232	1.50472	1.40958	6.27654	6.18729	6.29924	2.57934	2.44711	2.42617	8.60731	8.47886	8.66983	2.33263	2.0157	2.05644	4.01963	4.33319	4.02928	1.25614	1.20084	1.11944
Actn1	ENSMUSG00000015143	5.81618	5.85616	5.65152	6.99071	6.44355	6.90387	6.38586	6.30644	6.15928	6.45813	6.50865	6.36933	5.87639	6.01593	5.83533	6.55814	6.55199	6.4816	5.26936	5.27209	5.26235	6.70317	6.79745	6.73871	5.85935	5.89688	5.9497	6.43238	6.26225	6.35272	5.57869	5.63575	5.66215	6.44311	6.53735	6.48882	5.89374	5.94977	5.8046	5.22155	5.46724	5.60561	6.41196	6.53829	6.5775	5.67286	5.75127	5.83037
Sirt2	ENSMUSG00000015149	5.48103	5.49979	5.58791	5.87516	5.74416	5.82833	5.35864	5.30064	5.19057	5.96825	5.69231	5.68622	5.4738	5.41112	5.55368	5.69783	5.69521	5.7678	5.38868	5.26021	5.4851	5.96075	5.99237	5.76884	5.4297	5.49759	5.37569	5.92435	5.77808	5.86127	5.36456	5.43429	5.40765	6.10586	5.89021	6.00847	5.57609	5.57506	5.54274	5.48827	5.61888	5.56186	6.2086	6.19939	6.39155	5.37356	5.49116	5.64184
Nolc1	ENSMUSG00000015176	6.28853	6.54043	6.37551	6.79935	6.86476	6.67497	6.37367	6.49597	6.45018	6.7864	6.82343	6.75991	6.27115	6.43914	6.27819	6.90262	6.88119	6.81342	6.14042	6.10925	6.24481	5.96959	5.99854	5.94904	6.25754	6.18928	6.17986	6.15666	5.87536	6.15796	6.23729	6.19776	6.22514	6.00116	6.00917	6.03815	6.14184	6.04021	6.05208	6.18619	6.24258	6.37411	5.76127	5.84505	5.97536	6.20646	6.19744	6.34836
Casd1	ENSMUSG00000015189	4.75433	4.96194	4.93187	6.25875	6.07705	6.32045	4.95135	5.12656	5.22385	6.47685	6.50694	6.4793	5.07095	5.15651	5.11501	6.28256	6.62365	6.64783	4.94907	4.97202	5.00889	5.53158	5.48176	5.28516	5.05372	5.07605	5.07967	5.60998	5.55828	5.5358	5.04111	5.00388	5.02347	5.31634	5.41157	5.33661	4.88898	4.93701	4.83686	4.9128	4.90376	4.88736	5.28986	5.22188	5.23324	4.84833	4.84727	4.87215
Cnksr3	ENSMUSG00000015202	3.83937	3.76164	3.76744	3.84254	3.39419	3.6792	3.99634	3.94387	3.83298	3.72211	3.76122	3.6029	3.94189	3.90035	3.99464	3.86664	3.6704	3.67171	4.3374	4.25073	4.19348	3.63413	3.67059	3.52948	4.37546	4.35695	4.18065	3.75429	3.6485	3.54025	4.19889	4.22044	4.22419	3.63064	3.62772	3.55761	3.724	3.69122	3.55504	4.43952	4.49368	4.41913	3.63065	3.78886	3.63807	4.61019	4.66664	4.59888
Mtmr1	ENSMUSG00000015214	2.91333	2.8828	2.91555	2.74558	2.79088	2.91004	2.70549	2.6158	2.74522	2.56	2.69331	2.57235	2.60196	2.60481	2.71483	2.5273	2.77032	2.83399	3.5006	3.26559	3.18339	3.14954	2.98711	2.82875	3.42027	3.25876	3.13808	3.25227	2.96442	3.09764	3.40687	3.28109	3.24074	3.28471	3.12995	3.10362	3.69198	3.51665	3.40663	3.65044	3.61872	3.50634	3.27841	3.42505	3.38389	3.63082	3.84126	3.66092
Hmgb3	ENSMUSG00000015217	8.67024	8.8942	8.75789	9.23915	9.00321	9.34835	8.48674	8.76397	9.00125	9.09395	9.30546	9.14706	8.58264	8.77049	8.65673	9.13825	9.19107	9.43963	8.07109	8.03755	8.12755	8.4514	8.47429	8.27303	8.07057	8.02129	8.34992	8.1563	8.08157	8.26429	8.04321	8.08452	8.3022	8.33782	8.31456	8.44314	8.12913	8.08455	8.02954	7.92688	7.74161	7.75079	8.02195	7.84526	7.89547	7.99124	7.99215	7.8086
Map2	ENSMUSG00000015222	6.15407	6.27539	6.30159	4.2108	3.27796	4.08418	3.74173	3.78706	3.69885	3.64985	3.8296	3.82943	4.27584	3.96945	4.47455	4.37727	4.44235	4.74641	4.11027	4.20698	4.10232	4.44646	4.09927	3.98778	4.14837	4.19979	3.90071	4.35402	4.16023	4.08606	4.11447	4.1627	3.99545	4.96672	4.99544	4.72297	6.31848	6.3672	6.0885	4.5452	4.53707	4.34391	4.91535	4.76124	4.39539	4.43018	4.49727	4.54823
Cyp2j9	ENSMUSG00000015224	0.817715	0.7275	0.82061	0.40068	0.638303	0.46221	1.09814	0.763789	0.89611	0.296114	0.332653	0.248498	0.70978	1.14735	0.888154	0.410391	0.452633	0.560475	1.18045	0.956127	1.24927	0.689858	0.619684	0.764905	1.0958	0.97098	0.914161	0.689052	0.541395	0.521326	1.00765	1.05418	0.998942	1.05339	0.729466	0.901962	1.27532	0.989483	1.12791	1.41602	1.37253	1.40665	1.19469	0.996639	1.30929	1.61315	1.51217	1.49361
Abca1	ENSMUSG00000015243	1.867	1.822	1.75653	1.52861	1.10271	1.32301	1.86959	1.76574	1.47841	1.63368	1.74077	1.35201	1.89484	1.63629	1.63231	1.61595	1.45714	1.37429	2.92719	3.11313	2.97222	2.19041	2.03637	1.8813	2.53787	2.6839	2.54287	2.21076	2.14741	1.9205	2.60421	2.65958	2.70569	1.84349	2.23257	1.65662	2.33816	2.3953	2.40257	2.57361	2.62242	2.70411	2.58672	2.40816	2.64302	1.8102	1.89878	2.05455
Nipsnap3b	ENSMUSG00000015247	5.19209	5.15364	5.16303	4.69991	5.14426	4.84972	5.14657	4.94105	5.18279	5.21075	5.03697	5.35253	5.04105	4.97765	4.95374	5.41716	5.15472	5.20979	4.85808	4.64447	4.93269	4.7899	4.79442	4.66412	5.1049	4.99864	5.04362	5.27742	4.98019	5.24335	4.91762	4.83625	4.95144	5.24858	5.04134	5.31236	5.48949	5.45633	5.40575	4.36235	4.29121	4.44507	4.43531	4.6121	4.59798	4.63231	4.49865	4.55819
Gdi1	ENSMUSG00000015291	7.05587	7.18907	7.16573	6.86867	6.52639	6.69923	6.66305	6.68782	6.73318	6.83324	6.50644	6.77027	6.97112	6.7864	7.07107	6.57888	6.53186	6.63152	6.64683	6.83436	6.73729	6.94102	6.76556	6.67941	6.68323	6.64807	6.62865	6.84445	6.70411	6.89336	6.59449	6.68214	6.43491	7.12279	6.91732	6.88907	7.48834	7.29831	7.27339	7.08077	6.90373	7.09128	7.42292	7.15941	7.39579	7.1034	6.88527	6.95061
Sash1	ENSMUSG00000015305	3.76622	3.80267	3.65055	4.03157	3.22897	4.01306	3.6944	3.65259	3.56616	3.66897	3.8107	3.52497	3.93754	4.03659	3.96182	3.88748	3.90276	3.84384	3.91279	3.88899	3.86357	4.44895	4.38816	4.25042	3.9127	3.96518	4.01029	3.9384	3.8375	3.81789	3.96602	3.96191	4.07105	4.27813	4.44573	4.21844	3.70562	3.7728	3.72467	3.72954	3.70906	3.81217	4.57776	4.50177	4.5599	3.53186	3.64443	3.70548
Gadd45b	ENSMUSG00000015312	2.21636	1.92043	2.20765	1.85834	1.73391	1.70315	2.89932	2.97375	2.81829	2.23844	1.98007	2.23949	2.25596	2.33608	2.46589	1.16217	1.20331	1.6647	5.15667	4.94523	5.75696	3.20598	3.28099	3.15439	3.97359	3.91213	3.91416	3.48242	3.08013	3.21718	4.17234	3.79537	4.34696	2.84233	2.51502	2.69256	3.8487	3.55582	3.73177	5.65634	5.28158	5.53008	3.79774	4.32457	4.10776	4.94194	4.52135	4.85989
Zdhhc12	ENSMUSG00000015335	5.22377	5.16468	5.189	3.54182	3.64208	3.38725	5.15773	4.95733	4.7006	4.14753	4.1582	4.12129	4.80043	4.71494	4.99697	3.73858	3.90522	3.62302	4.0753	4.03102	4.269	3.46944	3.61663	3.34874	4.55775	4.52585	4.49858	4.28154	4.21544	4.27328	4.17053	4.28417	4.36364	4.14027	3.88894	4.04784	5.35015	5.27343	5.26756	4.19264	4.32025	4.35688	3.70681	3.74068	3.95959	4.5443	4.3828	4.56167
Xk	ENSMUSG00000015342	1.41926	1.60934	1.41708	1.8141	1.5533	1.86242	1.06729	1.17674	1.26027	1.29242	1.28052	1.35267	1.53236	1.40223	1.47537	1.53533	1.41474	1.55241	1.23187	1.35515	1.28427	1.94711	1.69857	1.61253	1.16934	1.02376	1.07901	1.91422	1.60394	1.47066	1.12465	1.13791	1.16764	1.70996	1.60963	1.44798	1.53832	1.53811	1.42933	1.19358	1.14834	1.12384	1.80834	1.6038	1.57896	1.11192	0.956773	1.09616
Pcolce2	ENSMUSG00000015354	2.90991	2.28273	2.71612	2.80394	1.94969	2.47665	2.83536	2.58894	2.57769	2.6257	2.51804	2.33277	4.02921	4.14467	4.14521	2.82974	3.07818	3.32065	1.82334	1.7236	1.73043	2.59171	2.46827	2.11801	1.73944	1.8599	1.55789	2.65706	2.14857	2.44276	2.70532	2.52909	3.22625	2.48078	2.2351	1.87299	3.10997	3.00844	2.66363	1.47503	1.83447	1.85556	2.84216	2.74878	2.72386	1.92712	1.62628	1.38193
Cd83	ENSMUSG00000015396	2.64816	2.54415	2.74846	1.00833	0.829079	0.9721	0.208967	0.285667	0.388756	0.84378	0.668608	0.545408	0.549557	0.412422	0.505593	0.645169	1.15906	1.00628	0.42772	0.535838	0.348577	1.91366	1.84646	1.6545	0.467474	0.506105	0.572947	1.31817	1.08491	1.16767	0.438426	0.637356	0.5961	1.14531	1.2814	1.37909	3.35746	3.33487	3.17882	1.01767	0.947245	1.01866	2.73155	2.67243	2.63986	0.553348	0.6075	0.741624
Tmem27	ENSMUSG00000015401	1.81154	2.07405	1.57418	0.10103	0	0.135474	0	0.160182	0.21856	0.0361736	0.171642	0.121555	2.91256	3.09119	2.92298	0	0.088499	0.163116	1.04026	1.36443	1.34764	0.0638485	0	0.0311014	0.164247	0.260623	0.26698	0.462787	0.0330466	0	1.56027	1.3409	1.72723	0	0	0	0.748909	0.663668	0.820284	0.334191	0.335041	0.52953	0.146151	0	0	0.530834	0.260399	0.325198
Ace2	ENSMUSG00000015405	0.720067	0.60991	0.715302	0	0.176689	0.0234514	0.505185	0.347452	0.628536	0.258992	0.114219	0.07203	0.92611	1.1241	1.14619	0	0.123547	0.0226262	2.50776	2.24741	1.99679	0.0891111	0.11829	0.10687	1.14422	1.24092	0.95525	0.0316973	0.0329689	0.0227257	1.10875	0.987036	1.05498	0.0238915	0	0.0236471	0.338076	0.345093	0.340007	2.96988	2.72925	2.74558	0.0673159	0.0421543	0.0595294	1.56818	1.64606	1.5266
C4a	ENSMUSG00000015451	0.747315	1.16632	0.846845	1.31697	1.55529	1.2973	1.31796	0.929168	1.13884	1.39956	1.41276	1.50138	1.43631	1.10259	0.956299	0.858492	1.31249	1.05701	1.02605	1.08611	1.50528	1.29105	1.05278	0.578434	1.16858	1.07252	1.41233	0.904963	1.32694	1.16282	1.10336	1.48046	1.65982	1.3152	1.25321	1.09334	1.36522	1.32563	1.05069	1.34208	1.52203	1.54897	1.29012	1.19098	1.52169	1.65441	0.879885	1.54809
Ager	ENSMUSG00000015452	2.02604	2.20036	2.15383	2.74188	3.01367	2.22212	2.75728	2.34348	2.2934	2.58021	2.59065	2.39066	2.31453	2.50652	2.62911	3.16604	2.48099	2.40539	2.29178	2.2404	2.59132	2.66208	2.64378	2.35471	2.15158	2.14912	2.30561	2.47466	2.46386	2.48528	2.08701	2.28969	2.37167	2.84092	2.64231	2.54493	1.80466	1.79723	1.85554	2.77564	2.65248	2.87076	2.80717	2.45765	2.91511	2.6329	2.26971	2.41706
Egfl8	ENSMUSG00000015467	0.414589	0.611215	0.526099	0.692443	1.2069	0.700072	0.597257	0.520651	0.572057	1.05122	0.524935	0.820521	0.580799	0.871236	0.857923	1.38018	1.53262	1.20913	0.766618	0.807732	0.637206	1.16302	0.994325	0.881303	0.809135	0.629178	0.583806	1.72939	1.81525	1.3895	0.923958	0.627234	1.0922	2.80298	2.51667	2.493	0.738368	0.89082	0.586658	1.18256	0.940625	0.974778	1.2704	1.92893	1.43306	0.917825	0.581598	0.99373
Notch4	ENSMUSG00000015468	2.29642	1.51885	1.59861	2.81549	3.01513	2.69112	1.04948	0.785279	0.842459	2.53494	2.17562	2.55352	1.51559	1.04079	1.16001	2.75013	2.24003	2.10444	0.464465	1.03065	1.17977	2.75918	2.749	2.50212	0.619962	0.841	0.933029	2.66476	2.603	2.60086	0.820437	0.977607	1.09653	2.63765	2.64328	2.53474	1.81106	2.07345	1.77165	0.826903	0.728638	0.404169	3.13278	2.76097	2.6815	0.773854	0.588521	0.628058
Ppt2	ENSMUSG00000015474	4.72187	4.39328	4.4916	4.62116	4.37957	4.68403	4.74567	4.37934	4.01411	4.34732	4.30974	4.07006	4.31267	4.31887	4.60031	4.35619	4.71198	4.58088	4.14269	4.07154	4.20967	4.68321	4.67069	4.57504	4.14628	4.10204	4.08665	4.41193	4.36342	4.24819	4.06645	4.13836	4.07881	4.65534	4.56045	4.58189	3.98294	4.05668	3.96006	4.09352	4.20599	4.04781	4.7626	4.65763	4.69685	3.98773	4.1348	4.17995
Prrt1	ENSMUSG00000015476	0.820101	1.21332	1.04974	0.294996	0.0631453	0	0.254843	0.323333	0.271034	0.0222748	0	0.100084	0.380721	0.173463	0.308321	0.210592	0.136575	0.101827	0.168405	0.10575	0.189766	0.214846	0.196076	0.140336	0.186186	0.345676	0.128692	0.339966	0.108713	0.30028	0.230664	0.413953	0.372606	0.477834	0.268595	0.411064	0.570442	0.620274	0.634235	0.623887	0.579619	0.68289	1.10578	0.951348	1.37767	0.531672	0.602447	0.784429
Cacfd1	ENSMUSG00000015488	6.27859	6.15486	6.26615	5.82454	5.8933	5.80048	6.23956	6.14813	5.84984	6.15766	6.20763	6.08796	5.96949	6.06035	6.11144	6.34322	6.07707	6.03533	6.14532	6.15656	6.14804	6.44402	6.38267	6.12778	6.44451	6.40264	6.17413	6.76963	6.66145	6.69541	6.34528	6.3078	6.3557	6.81532	6.89976	6.76524	6.73793	6.75249	6.7571	5.89004	6.01065	5.92594	6.03333	5.98838	5.96062	6.15745	6.11051	5.98192
Hivep2	ENSMUSG00000015501	2.11601	2.13545	2.08913	1.10854	0.609575	0.945038	2.18719	2.17585	2.22713	1.17873	1.41485	1.47587	2.54575	2.56064	2.5291	1.00496	1.22751	1.08731	2.73889	2.89549	2.88982	1.93391	1.87662	1.65304	2.83298	2.78145	2.74169	1.73686	1.51331	1.28818	2.69845	2.73098	2.68817	0.811724	0.806586	0.617235	2.53971	2.45731	2.24885	2.17177	2.1933	2.22658	2.19827	2.07502	2.03827	2.31249	2.37355	2.39774
Itga2	ENSMUSG00000015533	0.0679742	0.0955633	0.0672663	0.853284	0.198174	0.918555	0.382585	0.250119	0.288191	0.581935	0.645813	0.817121	0.0761036	0.0992443	0.100836	0.455438	0.775262	0.949964	1.96219	1.92165	1.60853	1.26933	1.0062	0.902544	2.16271	2.14612	2.01356	0.905461	0.946112	0.801241	2.18497	2.03677	1.84998	1.03685	1.23007	0.898153	0.399831	0.425505	0.316501	2.58328	2.72725	2.71667	1.26109	1.28634	1.07776	2.72136	2.88933	2.89651
Mocs2	ENSMUSG00000015536	5.07981	5.10648	5.13691	5.5259	6.16743	5.52188	4.9584	5.04348	5.04628	5.59575	5.73314	5.67545	4.93763	5.01046	4.84293	5.49732	5.64401	5.7552	5.33946	5.30085	5.36982	5.9107	5.90592	5.7375	5.29459	5.17477	5.1122	5.87698	5.74063	5.85965	5.3264	5.27261	5.30251	5.97349	5.76487	5.89866	5.28225	5.1946	5.11089	5.37819	5.39858	5.42305	6.02798	6.0271	6.08231	5.43666	5.48854	5.27833
Lpl	ENSMUSG00000015568	2.74393	2.68152	2.74585	3.81111	4.10427	3.85338	3.11669	2.98946	3.20298	3.98151	4.05193	4.11252	2.70205	2.8549	2.69688	4.08941	4.31565	4.42472	2.21384	2.36833	2.44953	3.25713	3.27069	3.06935	1.97462	2.00921	2.0503	3.54268	3.45041	3.5253	1.85316	1.93055	1.87612	3.57485	3.63712	3.64179	2.14267	2.16339	1.87364	1.45945	1.40171	1.56478	2.55777	2.49347	2.45489	1.45708	1.38206	1.31028
Nkx2-5	ENSMUSG00000015579	0.0294566	0.0486353	0.0226976	0.0809132	0	0	0.841926	0.746769	0.702196	0.0281407	0	0.118322	0.0458947	0	0	0	0.0703419	0	0	0	0	0	0	0	0.0244303	0.179158	0.110914	2.7548	2.45879	2.17274	0	0	0	0	0	0	0.330155	0.481836	0.27221	0	0	0	0	0	0.0402023	0	0	0
Ttbk1	ENSMUSG00000015599	1.02428	0.941127	0.959164	0.370989	0.228745	0.409842	0.0929542	0.0498582	0.0304617	0.270229	0.314343	0.250207	0.0814508	0.136038	0.114869	0.311715	0.37234	0.323001	0.0539351	0.0756597	0.0995445	0.886785	0.834832	0.788758	0.0478642	0.0526282	0.0169236	0.983468	0.739464	0.869446	0.0176343	0.0536171	0.0160918	1.09235	1.0559	1.04082	1.6787	1.68682	1.48204	0.0333087	0.0424645	0.0352106	0.705519	0.657581	0.574758	0.035729	0.0143767	0.0328356
Gata3	ENSMUSG00000015619	3.83173	3.43131	3.46985	3.81864	3.44184	3.55644	4.64229	4.58337	4.3481	2.9827	3.04273	3.08926	4.33232	4.27407	4.4964	3.78974	3.73919	3.63451	2.82822	2.7713	3.47231	4.42705	4.50426	4.46953	3.26374	3.31269	3.42721	2.00336	1.87938	1.81674	3.33531	3.25918	3.35417	3.93972	3.94414	4.0824	3.16211	3.26674	3.1606	2.97708	2.95115	2.89496	3.95137	4.04514	4.1062	3.01582	3.51272	3.69101
Lama5	ENSMUSG00000015647	5.27794	5.18325	5.01268	0.971886	1.74334	1.39496	6.22558	6.1484	5.92613	1.71075	0.996842	0.970849	6.02707	6.12268	6.01897	0.790574	0.881389	1.32118	6.027	6.20284	6.56117	0.714947	0.618715	0.65629	6.08068	6.3659	6.34588	1.60386	1.78413	1.66367	6.31023	6.36097	6.23302	1.01948	1.33417	0.769562	5.03352	5.33091	5.69962	6.16078	6.62043	6.90593	0.958333	1.1056	1.45445	6.32659	5.84974	6.85784
Steap1	ENSMUSG00000015652	1.54951	1.40492	1.7102	1.37966	1.26601	1.27923	1.82989	1.69831	2.0265	1.55901	1.78895	1.43814	1.79001	2.07505	1.82355	1.70267	1.89905	1.97241	0.785789	0.766711	0.874159	1.31474	1.25516	1.29899	0.766497	0.447905	0.645737	1.5919	1.49372	1.38186	0.798372	0.694559	0.891306	1.68411	1.63027	1.45605	1.38107	1.35937	1.49573	0.553398	0.574127	0.480946	1.26857	1.2418	1.14323	0.349229	0.423525	0.287809
Steap2	ENSMUSG00000015653	2.76574	3.10697	2.93225	1.87036	1.51807	2.11623	3.12613	3.151	3.1688	2.20376	2.33109	2.22995	3.18641	3.13774	3.10926	1.94168	2.18341	2.09497	2.51701	2.60283	2.63755	2.44325	2.43982	2.27291	2.19689	2.25338	2.14604	2.3021	2.22535	2.12221	2.29752	2.28614	2.18787	2.31036	2.36469	2.29391	2.25001	2.36939	2.19484	2.14911	2.06425	2.09127	2.71211	2.58371	2.62188	1.7366	2.04284	1.99064
Hspa8	ENSMUSG00000015656	12.109	12.1897	12.0881	12.4356	12.1302	12.3976	12.0899	11.9477	12.0022	12.3194	11.9575	12.2587	11.9012	11.8237	11.9718	12.3663	12.3885	12.3889	11.0997	11.2638	11.1298	11.0086	11.1435	10.9305	11.2258	11.0951	10.4407	11.3366	11.202	11.1833	11.1727	11.1402	10.9519	11.1244	11.3299	11.1135	11.3998	11.4023	11.1584	11.0709	11.1611	10.9692	11.073	10.9879	10.806	11.0547	11.2949	10.9352
Anxa9	ENSMUSG00000015702	1.4652	1.47467	1.51217	0.775393	0.662448	0.922522	2.42899	2.33439	2.11959	0.67956	0.784048	0.789711	1.67234	1.90934	2.19018	0.857715	1.01487	1.01873	3.68714	3.54649	3.59374	0.758968	0.8552	0.808087	2.56495	2.43522	2.42457	0.668846	0.567923	0.774079	2.45065	2.3263	2.44448	0.996132	0.771571	0.718234	1.30318	1.11882	1.32691	3.72905	3.58471	3.66871	0.624657	0.734351	0.873444	2.2086	2.43729	2.58329
Arnt2	ENSMUSG00000015709	5.15965	5.21848	5.22434	5.13431	4.77722	5.14854	5.0832	5.11194	4.98549	4.98109	4.98874	4.9607	5.19125	5.22228	5.24288	4.91758	4.9656	4.95134	5.22069	5.21371	5.30876	5.67362	5.62572	5.61732	5.00762	5.00639	5.06685	5.41143	5.29093	5.37701	5.13906	5.14711	5.16949	5.58357	5.59858	5.51939	5.16826	5.15588	5.19865	4.69154	4.63201	4.65427	5.58667	5.56509	5.6295	4.42986	4.47486	4.47354
Plekho1	ENSMUSG00000015745	6.84061	6.9031	6.94064	8.17273	8.21047	8.20028	6.54766	6.53486	6.43852	8.23974	8.02825	8.03494	6.58105	6.55721	6.69328	8.25124	7.99159	8.15148	6.04844	5.92542	6.17557	7.75576	8.03107	7.93177	5.92675	5.92578	5.81379	7.78833	7.83932	7.92871	6.12937	6.18685	6.30929	7.98318	7.77464	8.12194	6.83208	6.78077	6.76307	5.46514	5.32617	5.43466	7.4299	7.50172	7.57781	5.25164	5.04042	5.04498
Vps45	ENSMUSG00000015747	4.14173	4.21555	4.28392	4.37235	4.48975	4.30686	3.94095	3.87806	3.83117	4.08724	4.11848	4.31445	4.17673	4.07788	4.04858	4.51587	3.86347	3.89718	4.26682	4.17186	4.00056	4.59202	4.51816	4.26219	4.21375	4.04229	3.90234	4.34737	4.57529	4.31652	4.23186	4.15839	4.14876	4.59638	4.4911	4.64099	4.47776	4.69705	4.58374	4.43232	4.29097	4.18334	4.96113	4.96962	4.90907	4.30483	4.38607	4.44188
Anp32e	ENSMUSG00000015749	9.05957	9.0484	8.99034	9.30957	9.12041	9.35898	8.98224	8.99017	9.15307	9.18465	9.50241	9.27435	8.77286	8.98024	8.88411	9.63382	9.35546	9.52714	8.53872	8.39415	8.46741	8.85251	8.80394	8.63049	8.52024	8.44604	8.58931	8.59694	8.44827	8.6933	8.55786	8.51616	8.7054	8.81775	8.78534	8.84887	8.65218	8.6267	8.51257	8.5002	8.40809	8.41189	8.51726	8.44322	8.36325	8.46102	8.55098	8.28185
Eps8	ENSMUSG00000015766	2.19247	2.28856	2.21405	3.88433	3.46009	4.10614	1.92246	1.9018	1.82425	1.46849	1.10457	1.28515	2.10104	2.03592	1.85364	2.29595	1.96851	1.87705	2.12467	1.96857	2.00103	4.83752	4.82684	4.65202	1.93361	2.10617	1.77466	2.76817	2.34501	2.43627	2.7802	2.70781	2.48041	2.91882	3.14481	3.01051	2.39302	2.0446	2.18483	2.57864	2.64823	2.61449	4.75718	4.9297	4.79995	2.20763	2.28974	2.3454
Qdpr	ENSMUSG00000015806	6.20696	6.22839	6.26069	6.76601	6.77992	6.63361	5.9423	5.62712	5.55187	6.58102	6.49773	6.3584	5.42021	5.61973	5.60161	6.21905	6.49856	6.47056	5.84719	5.73794	5.8361	6.69093	6.8777	6.85659	5.84907	5.80987	5.80152	6.70396	6.64977	6.75581	5.89644	5.73855	5.81818	6.64872	6.52821	6.68191	7.54688	7.48958	7.38204	5.40966	5.47787	5.46149	6.15541	6.28224	6.23883	5.70783	5.70362	5.57359
Gnrh1	ENSMUSG00000015812	0.57925	0.504576	0.915489	0.300602	0	0.109317	0	0.106174	0.102971	0	0.231042	0.357904	0.176664	0.102043	0.269763	0	0.262977	0	0.852235	0.850814	0.571748	0.912333	0.612738	0.637624	0.28389	0.571551	0.412722	0.192299	0.29065	0.268019	0.476467	0.112083	0.312169	0.106686	0.512509	0.291334	4.69523	4.61352	4.20776	1.41613	1.91893	2.02774	2.17143	2.63371	1.21591	2.87568	2.26622	2.32229
Nfe2l2	ENSMUSG00000015839	4.82756	4.90808	4.84595	5.26059	5.14048	5.26414	5.34065	5.3029	5.44386	5.25379	5.35089	5.35778	5.19958	5.21037	5.19411	5.66234	5.70273	5.83292	5.04634	4.98802	4.99812	5.03462	4.96479	4.89225	5.1958	5.01697	5.02661	5.08702	4.92156	5.03482	4.72351	4.66567	4.79846	5.24845	5.19932	5.17636	4.67201	4.61059	4.61439	5.04361	5.05878	5.04657	4.90559	4.88695	5.03415	4.84559	4.90004	4.96647
Rxrg	ENSMUSG00000015843	0.356202	0.373085	0.446898	1.36237	0.853877	1.70993	0	0.137053	0.0737374	1.55687	1.31698	1.45663	0.150092	0.091576	0.0685658	1.22335	1.23128	1.24384	0.131418	0.0264191	0.0525255	1.78614	1.70172	1.32517	0.0239419	0.0263021	0.0535333	2.84285	2.63422	2.22114	0.0427721	0.0262849	0.0969106	1.20919	0.827443	0.788905	0.657424	0.532932	0.494044	0.333814	0.315679	0.483788	1.82288	1.81367	1.90804	0.0739433	0.0919246	0.0257265
Rxra	ENSMUSG00000015846	5.56688	5.40323	5.4776	5.79449	5.06458	5.62273	5.99746	5.81646	5.57242	5.4792	5.38179	5.25668	5.68244	5.67795	5.85173	5.50601	5.5369	5.59144	6.26218	6.18607	6.21615	6.04468	6.01718	5.75609	6.46063	6.36688	6.2716	5.76436	5.63059	5.66313	6.36021	6.33608	6.26666	5.85087	5.85413	5.71026	5.42546	5.38379	5.30321	6.53802	6.39575	6.35913	6.26437	6.09171	5.98543	6.34766	6.44891	6.39544
Fcrls	ENSMUSG00000015852	0.145567	0.150662	0.07181	1.4868	1.26258	1.18022	0.0865491	0.188525	0.0328483	1.27784	1.22527	1.40563	0.101521	0.248517	0.239235	1.62921	2.55643	2.2118	1.07353	1.09229	0.620896	2.57727	2.21922	2.20716	0.899568	0.868145	0.757867	2.40902	2.4043	2.23502	0.948653	0.764641	0.929133	2.08989	2.00503	2.08522	2.02026	1.60714	1.43023	1.32889	1.00131	1.01228	2.90591	2.94886	1.77611	0.590199	0.681102	0.425635
Fam184b	ENSMUSG00000015879	0.435768	0.343292	0.481465	0.328257	0.266717	0.498032	0.494577	0.440633	0.482845	0.430721	0.472458	0.596492	0.352916	0.334719	0.234696	0.552053	0.601822	0.698719	0.453967	0.448032	0.346966	0.242112	0.25093	0.21272	0.737818	0.55927	0.526326	0.212533	0.268026	0.217134	0.690496	0.689763	0.464597	0.148311	0.201254	0.180823	0.463977	0.468284	0.506093	0.907912	0.766621	0.783695	0.337838	0.358951	0.279429	0.817634	0.977349	1.03867
Ncapg	ENSMUSG00000015880	5.67269	5.81316	5.79506	6.06588	6.17861	6.23953	5.57532	5.76857	5.94068	6.09665	6.18175	6.223	5.57833	5.67387	5.52173	5.94126	6.16694	6.26178	5.54873	5.46645	5.5238	6.04095	5.8996	5.84781	5.63235	5.51291	5.62128	5.96617	5.85114	5.94392	5.58549	5.53421	5.67726	6.12568	6.07171	6.05748	5.84225	5.74173	5.574	5.15314	5.13595	5.18712	5.37452	5.40163	5.26881	5.52768	5.47753	5.33983
Lcorl	ENSMUSG00000015882	3.11289	3.32834	3.27853	3.127	2.61859	3.34656	2.8057	3.13434	3.23956	2.98388	3.04272	3.09162	2.9451	3.01178	2.79336	2.91632	3.2105	3.20857	3.32398	3.24895	3.37076	3.52803	3.40917	3.52579	3.34122	3.51224	3.35488	3.26478	3.16417	3.3468	3.10248	3.06645	3.26337	3.35561	3.40844	3.35117	3.82737	3.84512	3.77743	2.81736	2.83477	2.64468	3.19971	2.97657	2.93346	2.90766	2.68592	2.875
Dstn	ENSMUSG00000015932	8.54927	8.59556	8.6177	7.83331	7.96399	7.94108	8.78544	8.88875	9.01888	7.84103	7.90253	7.93036	8.69674	8.77372	8.69551	7.73654	7.82987	7.98862	9.05778	8.99768	9.13845	7.84948	7.77245	7.65529	8.98223	8.96602	8.96462	7.73198	7.54459	7.73134	8.89885	8.84474	8.99247	7.89626	7.73637	7.84226	8.73106	8.68981	8.60515	8.7534	8.7317	8.77826	7.74553	7.79731	7.87973	8.78529	8.93712	8.92865
Gtf2ird2	ENSMUSG00000015942	3.20178	3.00108	2.8106	2.37884	2.54736	2.24783	3.11888	3.17778	2.93625	2.81882	2.6545	2.67034	3.13764	3.37725	3.14359	2.95512	2.46337	2.53122	3.27509	3.37928	3.48961	3.20648	3.34602	3.14663	3.38227	3.47529	3.36574	3.20927	3.11891	3.15094	3.32067	3.3878	3.43821	3.08791	3.26646	3.06552	3.47431	3.38335	3.46187	3.07229	3.11216	3.18608	3.12644	3.09985	3.20921	3.16811	3.02583	3.30265
Bola1	ENSMUSG00000015943	5.59337	5.25818	5.322	4.65959	5.1421	4.58094	5.61781	5.42748	4.97607	5.1298	4.96073	5.01167	5.22192	5.21178	5.23666	5.19201	5.01479	4.96242	4.92372	4.8408	5.14702	4.54045	4.89934	4.6544	5.13614	5.15132	5.18415	5.06094	5.15264	5.19232	5.15336	5.2992	5.1891	5.06461	4.91383	5.23911	5.34714	5.3933	5.46645	4.81455	5.01001	4.46273	4.16603	4.59778	3.99672	5.07565	4.93536	4.98599
Gatsl2	ENSMUSG00000015944	3.41911	3.39119	3.42886	3.45632	3.19181	3.58495	3.09033	2.77883	2.62582	3.24696	3.07658	2.98601	2.93083	2.9103	2.98881	3.15609	3.05161	3.40192	2.86634	2.83567	2.82498	4.05078	4.01733	3.77233	2.69807	2.67157	2.46294	3.73781	3.48932	3.53476	2.88511	2.82613	2.72437	3.77442	3.85961	3.68684	3.43999	3.43814	3.36852	2.79687	2.77637	2.67339	3.97122	3.8514	3.80541	2.46833	2.45963	2.53279
Fcgr1	ENSMUSG00000015947	0.0328987	0.0408006	0.168899	0.926705	1.12802	1.40875	0.0191904	0	0.0143627	0.557252	0.865274	0.634754	0.0763232	0.0283898	0.0911754	1.24388	1.1069	1.19113	0.108716	0.134467	0.0890563	0.991634	1.09153	0.754365	0.0670305	0.102281	0.0930731	0.808052	0.930956	0.996896	0.154082	0.118457	0.172164	0.842524	0.736959	0.815289	0.416291	0.483326	0.352429	0.224343	0.164893	0.303381	0.72689	0.703309	0.553628	0.0979484	0.165677	0.0608056
Ncf1	ENSMUSG00000015950	0.423194	0.195382	0.480837	1.62809	1.51153	1.88132	0.397443	0.418235	0.358162	1.40561	1.36378	1.60646	0.546295	0.515927	0.779658	2.48891	1.73175	1.60844	1.79388	1.48049	1.25099	1.53881	1.71469	1.56663	1.30227	1.12887	0.881104	1.81121	1.8933	1.93545	1.22831	1.15824	1.14383	1.59696	1.53612	1.32027	1.09451	1.02088	0.809013	1.84604	1.75438	1.74159	1.52738	1.57404	1.0416	1.17375	1.35585	1.45666
Wnt11	ENSMUSG00000015957	0.951787	0.700884	0.817243	0.351225	0.494091	0.457116	1.31253	1.26829	1.07366	1.70608	1.33423	1.4255	1.2321	1.28219	1.06162	2.70416	2.672	2.6651	1.13611	0.878495	1.23408	1.90719	2.0388	1.92956	1.19654	1.41975	1.18328	3.36245	3.07763	2.93236	0.872209	0.945852	1.0067	4.45702	4.39074	4.31298	0.862392	0.879935	0.876539	1.5322	1.5066	1.38625	1.7641	2.22056	1.57467	1.37477	1.33267	0.990691
Cacna1d	ENSMUSG00000015968	0.662725	0.831593	0.826568	2.36649	1.88852	2.43738	0.792336	0.752067	0.829487	1.36095	1.53169	1.27845	0.901996	0.969267	0.951271	1.18048	1.07123	1.2668	0.866003	0.83828	0.850793	3.13327	3.03144	2.90753	0.932816	0.871453	0.909765	2.00402	1.83927	1.81884	0.946241	0.960054	0.917162	1.42798	1.49768	1.38743	0.938955	0.932543	0.913382	0.857784	0.856455	0.908436	2.76879	2.7168	2.8244	0.668096	0.648574	0.708731
Chdh	ENSMUSG00000015970	0.169867	0.125446	0.100895	0.256015	0.214531	0.125075	0.226284	0.127559	0.228752	0.0215133	0.0924647	0.0674216	0.1548	0.191734	0.136791	0.241971	0.104986	0.123214	0.0941206	0.0621905	0.103926	0.361835	0.368888	0.251057	0.314934	0.267928	0.327513	0.0838129	0.032674	0.03128	0.0946094	0.0809106	0.0746208	0.0561916	0.0837772	0.0719559	0.182222	0.157877	0.149933	0.188668	0.177188	0.122543	0.454285	0.409631	0.446042	0.293593	0.532707	0.595799
Lrrc27	ENSMUSG00000015980	2.52663	2.51895	2.49836	2.34463	1.95913	2.86722	3.26899	2.84265	2.76668	2.82364	2.70609	2.43729	2.42569	2.84909	2.58286	1.9113	2.49213	2.49312	1.6528	1.8896	1.87695	1.81137	2.08961	1.55589	2.27159	1.78401	1.81817	2.37268	2.01669	1.99752	2.07605	1.77182	1.9398	1.62	1.8811	1.66768	2.38689	1.90985	1.90605	1.37333	1.68564	1.16363	1.55101	1.50057	1.58157	1.67525	1.59373	1.66862
Stk32c	ENSMUSG00000015981	0.590626	0.70138	0.928369	1.09729	0.591802	0.747705	0.89138	0.690836	0.919419	0.867751	0.660126	0.684876	0.585129	0.58132	0.671283	0.754666	0.53346	0.482889	0.563393	0.77193	0.835595	1.2468	1.27901	1.15558	1.05513	0.852771	0.842553	1.19932	1.16251	1.01465	0.658174	0.763591	0.566497	1.48126	1.23089	1.57998	0.598887	0.561299	0.489391	0.378181	0.389401	0.411868	1.45229	1.52272	1.53761	0.778259	0.648912	0.608013
Skiv2l2	ENSMUSG00000016018	6.34973	6.43877	6.37568	6.64448	6.51254	6.77703	6.42403	6.43903	6.57104	6.64164	6.77385	6.73774	6.30176	6.39744	6.28384	6.71485	6.75832	6.86615	6.08895	5.98641	6.04168	6.3179	6.25761	6.2581	6.16059	6.09104	6.13222	6.33311	6.23603	6.28559	6.09904	6.0699	6.16841	6.38715	6.22048	6.30092	6.21335	6.15774	6.07456	5.85545	5.85244	5.73519	5.97627	5.98015	5.83337	5.87223	5.97712	5.84212
Lbp	ENSMUSG00000016024	0.529189	0.980047	0.366797	1.72537	1.30856	1.59683	0.834491	0.147591	0.189344	1.55727	1.40755	1.23037	0.397073	0.698209	0.892365	1.47158	1.08665	1.73431	0.135793	0.140115	0.0486313	1.91926	1.84336	1.25558	0	0.07952	0.0541514	1.79432	1.11863	1.25723	0.0727079	0.123914	0.173921	1.83541	1.30468	1.45802	0.896848	0.791459	0.829393	0.028865	0.0144961	0	2.37193	2.69217	2.13094	0	0.0146467	0.271048
Celsr1	ENSMUSG00000016028	4.82968	4.68688	4.64208	1.21135	0.850747	1.08285	4.6498	4.48983	4.17999	1.03495	1.12206	0.979652	4.36059	4.345	4.37201	0.764791	0.993121	0.776286	4.8905	4.95826	4.8322	1.26841	1.15211	1.07874	5.07026	5.0462	4.89099	1.15654	1.15125	1.00925	5.15707	5.07274	4.87765	1.04168	1.20978	0.968529	5.23085	5.25643	5.20179	5.05404	5.10028	5.09922	1.48982	1.52298	1.44824	5.02745	5.14007	5.17889
Fli1	ENSMUSG00000016087	0.402837	0.547647	0.713224	5.9699	5.33338	6.05555	1.16146	0.609518	1.20281	6.20345	6.41627	6.26002	0.484492	0.496632	0.667888	5.84584	6.11425	6.2872	0.182692	0.203024	0.152682	5.8303	5.85456	5.70287	0.259439	0.38488	0.543276	5.25688	5.25127	5.31211	0.373157	0.188278	0.246389	4.72858	4.72962	4.87666	1.4496	1.65627	0.558702	0.147708	0.297531	0.307359	5.21474	5.3806	5.0411	0.177831	0.210759	0.0353627
Stard13	ENSMUSG00000016128	0.99289	1.50705	1.12559	3.47959	2.47155	3.19713	2.1357	1.99502	1.98334	1.05298	1.42342	1.32038	1.57952	1.76336	1.55756	1.83143	1.72064	1.68993	1.8758	1.74006	1.93266	2.63338	2.40715	2.23382	1.72579	1.67799	1.71699	2.21052	2.1678	1.82692	1.7684	1.56214	1.62801	2.12248	2.06911	1.83142	1.15686	0.792911	0.571388	1.82372	1.52414	1.73738	2.87782	2.85014	2.7203	1.63861	1.77593	1.73036
Camk1g	ENSMUSG00000016179	3.57766	3.62234	3.60512	2.24539	2.25046	2.22262	3.68383	3.45341	3.33012	3.24506	2.93323	3.10229	3.88651	3.89164	3.9356	2.58906	2.90788	2.95455	3.48178	3.49244	3.58639	3.55644	3.39934	3.29522	3.80667	3.81302	3.82253	3.90093	3.7423	3.74149	3.99684	3.95272	4.03912	4.07735	3.81255	3.85226	3.80929	3.83872	3.77711	3.30051	3.46255	3.43917	3.91117	3.90908	4.09054	3.53819	3.49791	3.60177
Syt14	ENSMUSG00000016200	3.01352	3.04	2.94725	2.5896	2.13183	2.52753	2.7782	2.77799	2.84394	2.54729	2.6735	2.6685	2.79012	2.89876	2.87537	2.66484	2.67155	2.79653	2.99328	2.86576	2.82605	3.07345	2.87041	2.80899	3.04764	3.01097	2.98169	2.72967	2.59125	2.67932	3.04012	2.9613	2.9098	3.04999	3.15779	2.88795	3.30482	3.37062	3.23371	2.65428	2.60901	2.54201	2.84581	2.73257	2.5613	2.70502	2.58141	2.68985
H2-M3	ENSMUSG00000016206	0.370167	0.293164	0.29374	0.680657	0.195757	0.851247	0.183066	0.240642	0.357741	0.232063	0.683051	0.338539	0.405586	0.285075	0.377555	0.440005	0.503125	0.764276	0.605201	0.400454	0.556566	0.95061	1.11512	1.11224	0.345185	0.327615	0.335511	0.788169	0.639348	0.496497	0.466656	0.53186	0.486415	0.844131	0.924395	0.961507	0.442023	0.699128	0.591599	0.224665	0.314839	0.448381	0.734448	0.597483	0.823789	0.403575	0.250165	0.177174
Tubb1	ENSMUSG00000016255	0.127426	0.0275343	0.214615	2.77957	2.11869	2.78332	0.115437	0.195224	0.1416	1.39743	1.595	1.60195	0.19914	0.0291062	0.0807244	1.31704	1.99221	2.22324	0.162049	0	0.12148	3.12069	2.98413	2.75065	0.162072	0	0.123768	3.0637	2.93784	2.80261	0.0254761	0.120558	0.0309166	3.00933	2.99623	2.72809	0.990977	0.759735	0.429465	0.0808148	0.0544884	0	2.73986	2.3815	2.4009	0.0295501	0.0277537	0.0630643
Sertad4	ENSMUSG00000016262	5.30385	5.33098	5.26267	5.94506	5.6372	5.87619	5.84131	5.78144	5.85564	5.23581	5.16101	5.1326	5.95105	5.9549	6.04259	5.66878	5.6827	5.63749	6.20012	6.18252	6.27479	7.05694	7.0101	6.91281	6.0992	6.21361	6.15894	5.79271	5.65777	5.68794	6.0949	6.14823	6.15344	6.0537	6.13286	6.11794	5.32615	5.37932	5.38905	5.99824	5.90074	5.8805	7.16924	6.9795	7.23571	5.9767	5.96639	6.01075
Slc25a5	ENSMUSG00000016319	8.93615	8.91199	8.87914	9.3366	9.71118	9.4272	8.95605	8.76339	8.76045	9.45599	9.36973	9.44838	8.39579	8.48579	8.36334	9.52071	9.59352	9.64787	8.92315	8.80706	8.94744	8.55105	8.68229	8.53783	8.81253	8.64724	8.74973	8.70902	8.62466	8.73896	8.88208	8.84128	8.85995	8.61346	8.52824	8.67529	8.92952	8.89649	8.8056	8.85467	8.88644	8.93777	7.94983	8.09017	8.03634	8.78595	8.79076	8.76619
Kcnq2	ENSMUSG00000016346	0.708706	0.878255	0.7158	0.499516	0.390893	0.359211	0.153053	0.0595216	0.0857674	0.267935	0.365499	0.306009	0.120595	0.237542	0.088272	0.905285	0.381984	0.251831	0.239477	0.39409	0.191883	0.648624	0.572882	0.472483	0.207157	0.110595	0.186047	0.466548	0.281037	0.312888	0.220306	0.271256	0.107179	0.612985	0.458471	0.55524	1.49373	1.32396	1.15513	0.0919664	0.0694073	0.121422	0.502565	0.495361	0.468329	0.0402291	0.0135363	0.0402235
Eef1a2	ENSMUSG00000016349	0.538172	0.533824	0.500823	0.166293	0	0.220819	0	0.121694	0	0.0395212	0.0771667	0.0679838	0.0164149	0.0180236	0.0169053	0	0.0168821	0	0.136439	0.132573	0.164781	0.171815	0.16126	0.228084	0	0.0190625	0	0.0517976	0.0389078	0.0839961	0.0313369	0	0.0567994	0.244944	0.120168	0.0919863	2.44037	2.31114	2.29135	0.0336636	0.0663777	0.106597	0.422284	0.985395	0.486014	0	0	0.019486
Col20a1	ENSMUSG00000016356	0.167114	0.168668	0.163875	0.28083	0.202247	0.266072	0.225773	0.13335	0.14757	0.152199	0.17681	0.145915	0.322361	0.216644	0.269831	0.470371	0.192219	0.229478	0.383312	0.363162	0.245908	0.281269	0.241342	0.189154	0.298101	0.245016	0.302972	0.61619	0.462274	0.410485	0.257241	0.308173	0.282945	0.506287	0.480573	0.47041	0.157927	0.308253	0.173197	0.523431	0.457082	0.479343	0.388774	0.429131	0.477548	0.260521	0.350682	0.459699
Pls3	ENSMUSG00000016382	5.30403	5.41561	5.44739	5.74777	5.46912	5.90737	5.42423	5.56516	5.77703	6.10557	6.26233	6.27058	5.35465	5.46011	5.31415	5.98129	6.1682	6.37198	5.39032	5.322	5.40746	5.97122	5.8671	5.81699	5.77891	5.63874	5.82316	6.22163	6.1517	6.15632	5.86178	5.77262	5.81276	6.64281	6.5087	6.43805	5.49938	5.49541	5.32122	5.35065	5.37831	5.3599	6.10349	6.1167	6.09021	5.85324	6.16739	5.86911
Mpped2	ENSMUSG00000016386	5.89072	5.90595	6.02896	6.36261	5.40233	5.97507	5.30727	5.52462	5.52724	6.83862	6.74334	6.70166	5.45115	5.36076	5.31051	7.30518	7.39385	7.52041	5.1575	5.05135	5.15189	7.33248	7.40169	7.20844	5.17973	5.21431	4.90293	7.09009	6.86536	7.13638	5.17117	5.12619	5.18422	7.9795	8.04961	8.06941	6.63421	6.54584	6.43928	5.39355	5.01462	5.12282	7.13532	7.02416	6.85111	5.20376	5.26421	5.21466
Wt1	ENSMUSG00000016458	1.44392	1.45348	1.26475	0.172121	0.563513	0.208688	1.14126	1.0272	1.0999	0.103121	0	0.0153643	0.707688	0.605824	0.810718	0	0	0.0330745	0.383084	0.335813	0.418117	0.0905615	0.290981	0.188101	0.49064	0.503476	0.480009	0.188509	0.0637046	0.0452712	0.405336	0.565472	0.724083	0	0	0.0373072	1.08342	0.974337	1.06605	0.20396	0.236375	0.295657	0.0325194	0.132524	0.0781291	0.244033	0.133814	0.215874
Ppfibp1	ENSMUSG00000016487	4.7635	4.70597	4.73034	4.78002	4.5222	4.98729	5.05205	5.04	5.21299	4.93087	5.00121	4.92538	4.88158	4.93309	4.89914	4.78057	4.77795	5.07445	5.35514	5.1862	5.29856	4.9679	4.84244	4.63631	5.49906	5.47708	5.48179	5.13231	4.84872	4.84177	5.6271	5.5245	5.58004	4.80381	4.78161	4.54807	5.04633	4.96745	4.83814	5.90519	5.83831	5.82221	5.28507	5.26205	5.20672	5.87303	6.05612	5.91088
Cd34	ENSMUSG00000016494	1.58897	1.432	1.47596	6.3103	6.22943	6.32748	2.00865	2.05876	2.19282	5.80175	5.76052	5.79243	2.35836	2.35465	2.20413	5.80933	5.89266	6.06127	1.63631	1.52374	1.91923	6.26923	6.28081	5.91944	1.24968	1.48682	1.67927	6.03236	5.78229	5.76821	1.78607	1.77494	1.89936	6.10601	6.04072	5.96875	2.53582	2.73738	1.80513	1.43776	1.13612	1.27067	6.10819	6.10895	6.09367	0.864025	1.04493	1.0874
Plgrkt	ENSMUSG00000016495	4.70754	4.81176	4.75205	4.09729	4.74511	4.42512	4.34039	4.3534	4.64803	4.39983	4.41963	4.49927	4.3586	4.52915	4.36719	3.90425	4.24912	4.28455	4.89649	4.83776	4.91338	5.42291	5.30689	5.23136	4.62713	4.51441	4.89253	5.24018	5.00439	5.16439	4.97839	4.83704	4.89353	5.45738	5.13822	5.34455	5.097	5.17364	5.10406	5.19167	5.1192	5.1743	5.49967	5.45047	5.55709	4.76289	4.79704	4.68484
Gtf3a	ENSMUSG00000016503	6.77831	6.78164	6.7645	6.35131	6.51734	6.37395	6.75004	6.76821	6.75925	6.60393	6.43597	6.43304	6.61254	6.64516	6.63812	6.37896	6.40056	6.41005	6.55955	6.5986	6.74983	5.71847	5.93507	5.73896	6.66553	6.80795	6.60358	6.13419	6.05871	6.12349	6.62809	6.68221	6.76978	5.91294	5.92884	6.0076	6.64258	6.68284	6.67558	6.36651	6.54353	6.26146	5.54574	5.63242	5.59612	6.40516	6.53644	6.61699
Lnx2	ENSMUSG00000016520	3.8917	4.05225	3.74093	3.33191	3.00146	3.41761	3.69574	3.72865	3.74163	3.51459	3.56658	3.23706	3.67278	3.67856	3.51039	3.06426	3.28491	3.19697	3.89749	3.93559	3.94012	3.58836	3.49435	3.43947	4.16871	4.22859	4.33492	3.5297	3.30841	3.40765	4.0347	3.95622	3.96467	3.35997	3.32886	3.2293	3.99065	3.96783	3.97955	4.09161	4.37337	4.26639	4.01139	4.14321	3.97506	4.19222	4.41661	4.666
Dyrk3	ENSMUSG00000016526	3.73675	3.60578	3.68136	2.98488	3.18077	3.48702	3.52006	3.45455	3.42319	2.36905	2.62367	2.48701	3.58271	3.51967	3.36699	2.73143	2.56771	2.72728	3.27344	3.60091	3.41513	2.43674	2.30779	2.51893	3.12494	3.25009	3.11999	1.97166	2.01427	2.15172	3.32271	3.4431	3.25612	2.02356	1.97077	2.31616	3.43132	3.46196	3.55908	2.83655	2.714	2.40978	1.74729	1.69815	1.65096	2.65668	2.5801	2.35431
Lamp2	ENSMUSG00000016534	5.91298	6.10526	6.13698	5.7172	5.40363	5.86909	5.93888	6.12811	6.26775	5.70984	5.71839	5.68857	6.22091	6.22932	6.31572	5.43794	5.76739	5.96418	6.73417	6.70827	6.69695	6.32489	6.10387	6.03718	6.42559	6.40062	6.46538	5.87408	5.75478	5.70366	6.42666	6.3748	6.34627	6.08487	5.94862	6.00746	6.24578	6.21291	6.18058	6.46446	6.34234	6.33547	6.47657	6.39358	6.31203	6.10661	6.22478	6.07572
Atxn10	ENSMUSG00000016541	7.41232	7.52048	7.46358	7.33618	7.59568	7.42846	7.85566	7.94905	7.94741	7.522	7.6366	7.55069	7.6899	7.75702	7.67578	7.3261	7.47032	7.57573	8.66752	8.60852	8.67832	7.44332	7.42551	7.24292	8.38606	8.28326	8.3983	7.48879	7.26151	7.42425	8.56643	8.51712	8.60455	7.5572	7.44401	7.48519	7.45569	7.40822	7.37066	8.5925	8.51127	8.67065	7.29255	7.31234	7.49086	8.33917	8.41124	8.37367
Nup50	ENSMUSG00000016619	6.04963	6.1428	6.1334	6.29101	5.97698	6.24028	5.92688	5.9855	5.95465	6.21638	6.25387	6.18711	5.96032	5.97214	5.95418	6.27255	6.27467	6.25199	5.71297	5.69184	5.77793	6.10767	6.15708	5.90629	5.77816	5.7874	5.63521	6.0949	5.90485	6.03749	5.79519	5.79052	5.76644	6.08503	6.18621	6.04452	6.00219	6.04382	5.94513	5.25369	5.31464	5.22321	5.48435	5.58305	5.46377	5.1554	5.29344	5.24491
Phf21b	ENSMUSG00000016624	3.37453	3.56049	3.50034	2.28743	2.40668	2.41284	1.79842	1.69076	1.54943	2.17408	2.43691	2.28612	2.55477	2.13935	2.23659	2.58037	2.95107	2.05334	1.77487	1.75046	1.76506	2.56401	2.53104	2.09561	1.57956	1.49589	1.6382	2.0827	2.3118	2.03049	2.12172	1.91653	2.09581	2.73079	2.6407	2.42827	3.62703	3.58238	3.56435	1.88922	1.74597	1.8041	2.86941	2.51593	2.70565	1.78236	1.08915	1.38629
Ift27	ENSMUSG00000016637	6.15902	5.97857	6.10039	6.18059	6.18832	6.02557	6.00169	5.67374	5.48894	6.09606	6.08676	6.04146	5.64273	5.61048	5.81425	6.20673	6.08991	6.04929	5.20155	5.11542	5.2286	5.83763	6.04283	5.94705	5.26405	5.24026	5.2811	5.91322	5.92721	5.98608	5.36423	5.33124	5.36956	6.15076	5.93277	6.20098	5.96807	5.88526	5.82618	4.95017	5.00018	4.82385	5.47161	5.4189	5.46182	4.96381	5.03388	4.98698
Pacsin2	ENSMUSG00000016664	5.53309	5.48198	5.45509	5.81451	5.4819	5.71078	5.96382	5.93803	5.83078	5.63848	5.58198	5.4758	5.61048	5.62998	5.58391	5.74027	5.62559	5.64173	5.251	5.28125	5.3728	5.56511	5.60952	5.48671	5.35989	5.34005	5.38377	5.47238	5.43859	5.40696	5.23306	5.22925	5.24579	5.49729	5.5259	5.46157	5.08882	5.1045	5.01065	5.23001	5.20699	5.19682	5.48917	5.54002	5.45648	5.36551	5.44165	5.29144
Bik	ENSMUSG00000016758	2.1396	1.89889	2.04001	1.40488	1.19289	1.24083	1.11286	0.586809	1.13254	0.81468	1.06427	0.58453	1.50289	1.50281	1.42912	1.17685	0.968089	1.11253	1.08502	0.771381	1.11882	1.74543	1.66204	1.41706	1.01653	1.04211	0.816075	1.55021	1.58931	1.42667	1.16102	0.990866	1.36652	1.39039	1.45211	1.53393	1.86838	1.76736	1.70115	1.00735	1.17761	1.0384	1.37925	1.3549	1.37182	1.21411	0.949058	1.27978
Scube1	ENSMUSG00000016763	4.03209	4.08535	3.99728	5.99431	5.19995	5.84768	2.03132	2.01834	1.66739	4.03859	4.20181	3.90581	3.06246	3.25427	3.14451	4.94126	4.91903	4.89909	1.51547	1.4529	1.51922	5.26101	5.36842	5.25746	1.83469	2.01102	1.87472	5.59909	5.51273	5.45573	2.00038	1.77346	1.60007	4.31975	4.50865	4.48212	2.38811	2.69315	2.58542	2.47416	2.55826	2.71974	4.61141	4.78745	4.62316	2.06864	2.08963	2.30674
Mrps18c	ENSMUSG00000016833	6.30789	6.78157	6.6471	6.78301	7.69285	7.04327	6.29105	6.57294	6.70819	6.99408	6.89434	6.96117	6.49227	6.38532	6.34795	6.85326	7.01543	7.14495	6.5359	6.27683	6.40881	6.57334	6.78496	6.59088	6.40266	6.36361	6.33619	6.64123	6.52894	6.74928	6.56405	6.38814	6.47485	6.73863	6.43427	6.83418	6.41568	6.47272	6.38295	6.39009	6.24926	6.18692	6.03179	6.08493	5.94205	6.24938	6.34338	6.17616
Sulf1	ENSMUSG00000016918	6.70061	6.8118	6.74565	5.24505	5.05632	5.25836	6.43322	6.4827	6.41349	3.94893	4.04908	3.8853	6.81761	6.90044	6.81083	4.81309	4.71123	4.76408	6.53466	6.63484	6.58726	6.24782	6.04189	5.74774	6.32304	6.45412	6.45569	5.79964	5.48428	5.60975	6.39345	6.55682	6.59012	6.06665	6.00396	5.87838	6.93742	6.91338	6.91992	5.89051	6.07747	6.21102	6.58532	6.61159	6.84766	5.40289	5.34634	5.45875
Tmprss6	ENSMUSG00000016942	1.66827	1.52675	1.75658	0.388287	0.300008	0.374171	0.0456247	0.0561204	0.0566218	0.0618833	0.0489235	0.0326112	0.139481	0.120953	0.162646	0	0.0107024	0	0.0112349	0.0124631	0.0362539	0.0892901	0.0470966	0.180363	0.0109305	0.0120495	0	0.0757269	0.0489508	0.0217377	0.00996653	0.024455	0.0121256	0.0238767	0.0445561	0.0238234	3.63891	3.4817	3.2447	0	0.0213612	0.00997844	0.307097	0.647108	0.259291	0	0.0320907	0
Etaa1	ENSMUSG00000016984	4.90937	4.9638	5.0868	4.72029	4.52159	4.85732	4.5901	4.69031	4.94912	4.84479	4.89125	4.8245	4.8506	4.87824	4.82927	4.78686	4.80752	5.06612	5.06779	5.08727	5.04341	4.62661	4.59421	4.54369	4.82866	4.81799	4.86617	4.6944	4.65963	4.73842	5.05075	5.10038	5.10542	4.72622	4.67973	4.81856	4.95479	4.95184	4.94587	4.31988	4.26849	4.11647	3.96935	4.0568	3.79793	4.36072	4.4911	4.18085
Matn4	ENSMUSG00000016995	0	0	0.0163282	0.0566393	0	0.0565697	0.119039	0.106909	0.156083	0.0287355	0.0199767	0.0175534	0.00799261	0.0782986	0	0	0.034061	0	0	0.0397138	0.0195512	0.505323	0.349323	0.308359	0.0473075	0.0193447	0.0552183	1.15431	0.716072	0.496658	0.06428	0	0.0948182	0.292728	0.247276	0.222147	0.571276	0.392694	0.352633	0.124301	0.204334	0.182238	4.23877	4.65575	4.25937	0.691857	0.45154	0.336367
Slpi	ENSMUSG00000017002	0	0	0	0.103633	0.958656	0.430252	0	0	0	0.233933	0.249957	0.248096	0	0	0	0	0.074553	0.150992	0	0	0	0.79464	0.508505	0.399766	0	0	0	0.540733	0.427105	0.358344	0	0	0	0.32788	0.227358	0.194318	0.177473	0.113362	0	0	0	0.134001	1.09007	1.46412	1.6867	0	0	0
Sdc4	ENSMUSG00000017009	4.58272	4.53785	4.60069	3.20711	2.97109	3.04729	5.51486	5.49957	5.48788	2.60674	2.57966	2.55279	5.51852	5.51746	5.53952	2.52629	2.61042	2.44582	5.96383	5.81049	5.8454	4.27701	4.25201	4.08598	6.03123	5.96425	5.92382	3.85796	3.79723	3.84556	6.02909	5.91342	5.88651	4.15035	3.99654	4.01772	5.15946	5.13921	5.05292	5.9854	6.01728	6.18789	4.39536	4.59349	4.47713	5.77099	5.84442	5.9509
Il13ra1	ENSMUSG00000017057	3.03884	3.06644	3.10973	2.22463	2.31576	2.37556	2.66798	2.82431	2.9618	2.21001	2.28567	2.26885	2.85541	2.89332	2.79262	2.38667	2.54715	2.6573	3.20104	3.10241	3.14262	2.89247	2.6611	2.46284	3.44295	3.27594	3.40636	2.34034	2.13105	2.26558	3.44282	3.4018	3.42168	2.34784	2.26783	2.36956	3.95973	3.89402	3.67647	3.39532	3.15307	3.09533	3.26253	3.18036	3.05117	3.41924	3.7873	3.47588
Rnd3	ENSMUSG00000017144	6.51732	6.64853	6.71711	5.69937	5.54154	5.73993	7.30776	7.56039	7.66007	6.79112	6.92666	6.85443	7.34789	7.41313	7.44849	6.25264	6.51888	6.55421	7.29907	7.3183	7.21165	6.73892	6.59719	6.45899	7.29508	7.30682	7.22112	7.24749	7.06969	7.1187	7.25148	7.22056	7.2586	6.52855	6.46694	6.44835	6.49523	6.46927	6.46387	6.51272	6.80187	6.52367	6.91526	6.98148	6.89578	6.5998	6.80895	6.75398
Brca1	ENSMUSG00000017146	4.76281	4.97391	4.73852	5.11831	4.4235	5.01705	4.8479	4.89139	4.97433	4.97833	5.06612	4.86426	4.82262	4.85285	4.63804	5.1578	4.96135	4.9909	4.49362	4.5272	4.44584	4.63128	4.63503	4.55469	4.53713	4.47639	4.37487	4.52084	4.49761	4.50774	4.55019	4.5297	4.48118	4.42858	4.6579	4.48607	4.55914	4.60954	4.51421	4.318	4.16433	4.13895	4.08894	4.01782	3.89071	4.28332	4.27913	4.20524
Gast	ENSMUSG00000017165	0	0.226924	0	0	0	0	0	0	0	0	0	0	0	0	0	0	0	0	0.442933	0.373188	0.675088	0.124527	0	0	0.529612	0	0	0.231602	0	0	0.110817	0.13652	0.26066	0	0.12003	0.12552	0.515702	0.305986	0.292758	0.311974	1.10405	0.464856	0	0	0.262522	0.83342	0.929327	1.27669
Cntnap1	ENSMUSG00000017167	0.182483	0.135655	0.126595	0.15592	0.0569412	0.0848575	0.382177	0.380379	0.288405	0.0941627	0.171712	0.124469	0.338801	0.167989	0.295829	0	0.125952	0.191731	0.726887	0.769923	0.72829	0.299505	0.275539	0.226583	0.979641	0.888115	0.743451	0.185039	0.233402	0.259624	0.798529	0.704089	0.633139	0.0947528	0.131866	0.100633	0.514446	0.389384	0.410153	1.5131	1.63714	1.74453	0.270742	0.286402	0.254853	1.9038	1.61771	1.81985
Taok1	ENSMUSG00000017291	4.28126	4.32052	4.20724	3.95108	3.34377	4.005	4.18557	4.35353	4.41077	3.86769	3.9945	3.90189	4.25786	4.38101	4.19936	3.89874	3.94573	3.93379	4.64981	4.72666	4.55571	4.13114	3.91323	3.90506	4.56155	4.58235	4.5913	3.99828	3.88056	3.85819	4.48864	4.51298	4.44519	3.89008	4.12654	3.84477	4.41465	4.5003	4.36877	4.30206	4.23381	4.22743	3.84939	3.62663	3.67232	4.21241	4.00477	4.14744
Tnnc2	ENSMUSG00000017300	0.339649	0.531129	0.267376	0	0	0	0.0873129	0.0659563	0.187547	0.270253	0.145597	0	0.114477	0.126972	0	0.0901865	0.826683	0.533014	0.187863	0	0.13757	0.285516	0.0685748	0.196317	0.0629045	0	0.143997	2.4207	1.97787	1.25882	0.166011	0.0713118	0.0704348	0.371853	0.0644067	0.477594	0.617489	0.270377	0.410892	0	0.060029	0.212001	0.217423	0.241977	0.0508818	0.294947	0.0600723	0.262881
Mpp2	ENSMUSG00000017314	4.16234	4.02775	4.10477	3.72769	3.30835	3.63904	3.59725	3.2136	3.13413	3.83062	3.49706	3.65829	3.58618	3.5631	3.58892	3.6851	3.42372	3.43819	3.18652	2.87627	2.86206	4.06956	4.1305	4.00442	3.27017	3.16822	3.16583	4.06822	4.01219	3.88081	3.47656	3.47306	3.30123	4.04671	4.06954	3.9641	4.27638	4.34767	4.24224	3.09803	3.16026	3.31912	3.86944	3.99257	3.97879	3.54535	3.53947	3.55022
Nlk	ENSMUSG00000017376	5.22362	5.33975	5.34818	4.45859	4.69137	4.55823	4.90969	5.06984	5.0647	4.1543	4.23136	4.2121	5.08152	5.06675	5.14804	4.02811	4.27251	4.34068	4.99722	4.97359	4.96971	3.71507	3.77083	3.66072	4.791	4.86211	4.77281	3.77167	3.67747	3.67143	4.93788	4.95736	4.99529	3.72143	3.66011	3.59573	5.87826	5.83128	5.70231	4.82282	4.78938	4.82158	3.78354	3.7722	3.52416	4.64732	4.68398	4.7486
Traf4	ENSMUSG00000017386	7.15052	6.88263	7.0095	7.57879	7.28191	7.37655	6.93071	6.70073	6.50489	7.6705	7.49623	7.42159	6.83706	6.78762	6.95616	7.85501	7.57184	7.51664	6.54587	6.31881	6.69031	7.16748	7.21867	7.16968	6.41816	6.32144	6.25223	7.31509	7.26283	7.32735	6.50042	6.53672	6.64129	7.22822	7.03014	7.23629	6.92098	6.91126	6.85321	6.49025	6.30444	6.38896	6.83129	6.98616	6.88479	6.02997	5.96569	6.00271
Aldoc	ENSMUSG00000017390	2.73008	2.94925	2.95102	1.74577	1.60031	1.55067	3.28439	2.62556	2.50006	1.418	1.21277	1.34611	3.11761	3.29343	3.11838	2.06577	1.43523	1.22732	2.77411	2.72537	2.92272	1.72346	1.66099	1.43064	2.90377	2.89501	3.08879	1.46489	1.25597	1.64958	2.9568	2.73197	2.82613	1.78289	1.48754	1.58486	3.48153	3.36626	3.5027	3.29071	3.67397	3.6198	2.58721	2.68673	3.01128	3.70905	3.95013	3.94018
Stac2	ENSMUSG00000017400	0.521791	0.401586	0.527922	0.499818	0.344096	0.390297	0.124189	0.126404	0.127482	0.700822	0.397071	0.364957	0.145973	0.222577	0.267163	0.347659	0.409343	0.451416	0.188358	0.173072	0.214395	0.890788	1.00701	0.688216	0.23231	0.133321	0.212067	0.761012	0.683983	0.653819	0.101296	0.227034	0.1912	1.22305	0.978785	1.06473	0.469812	0.350022	0.402968	0.140264	0.199933	0.140026	1.35229	1.25918	1.38522	0.127981	0.140432	0.0637833
Nek8	ENSMUSG00000017405	3.25935	3.25118	3.00253	3.11986	3.33353	2.41342	3.2732	3.49777	3.12936	3.33088	2.76411	3.00834	3.30982	3.4773	3.69247	3.17043	2.78597	2.9357	3.34284	3.29155	3.33593	3.55235	3.42675	3.42946	3.36676	3.45423	3.44164	3.57627	3.47946	3.40267	3.48938	3.4278	3.43178	3.68362	3.53863	3.61981	3.27311	3.14588	3.40608	3.3343	3.58544	3.71852	3.71807	3.75316	3.98396	3.58316	3.31821	3.82334
Cacnb4	ENSMUSG00000017412	1.04323	1.09401	0.50899	0.0708552	0	0.0672034	1.07783	0.391565	0.402093	0.0533498	0.0742983	1.24526	0.66326	0.190523	0.140465	0.0867859	0.0332641	0.0552116	1.89479	2.14776	1.81165	0.295393	0.18445	0.218694	0.445422	0.360197	1.0748	0.361799	0.258374	0.76685	0.944688	0.381431	0.435604	1.39653	0.229461	0.234753	1.53607	1.48956	1.0881	2.44589	1.49955	1.69416	0.987065	0.985725	0.509918	1.16923	0.611805	1.5039
Arl5b	ENSMUSG00000017418	5.5387	5.6442	5.61847	5.8503	5.919	5.95283	5.66852	5.74411	5.94787	5.88409	5.99932	6.00189	5.79485	5.79773	5.85089	5.80727	6.04252	6.1811	6.0366	6.03688	6.07648	5.76198	5.67133	5.50928	5.91251	5.95961	5.89742	5.87151	5.71822	5.80611	5.9507	5.88373	5.88193	5.83575	5.85062	5.81253	5.54508	5.52353	5.40267	5.65138	5.31241	5.35504	5.32209	5.21397	5.15638	5.3882	5.24193	5.25876
Psmd11	ENSMUSG00000017428	6.80728	6.86853	6.84539	7.07994	6.55706	7.13931	7.021	7.00541	7.00936	6.93617	6.91716	6.93874	6.70973	6.74662	6.93627	7.09081	7.0384	7.21021	6.41095	6.34394	6.40977	6.37269	6.40947	6.28615	6.42402	6.4068	6.32684	6.40687	6.20239	6.41984	6.45921	6.37197	6.42384	6.4038	6.32132	6.35307	6.42419	6.33629	6.2776	6.28457	6.33455	6.31693	6.28454	6.27838	6.21091	6.2614	6.45254	6.38853
C1qtnf1	ENSMUSG00000017446	0.921854	0.847349	0.838961	2.61792	1.95758	2.60308	0.765064	1.13236	0.97109	2.08475	2.0112	1.92733	1.00571	0.687652	0.652154	2.02442	2.03574	2.01022	0.510881	0.823711	0.545621	3.84197	3.80015	3.48503	0.573432	0.818469	0.757954	3.53109	3.17357	3.38102	0.626276	0.701773	0.70819	3.83208	3.83129	3.94446	1.0801	1.11603	0.987715	0.723716	0.717557	0.83986	4.13968	3.97421	4.06543	0.675063	0.848832	0.674942
Pipox	ENSMUSG00000017453	0.450551	0.410941	0.644255	0.118103	0.0202159	0.0611665	0.438351	0.613528	0.330856	0.0413735	0.100338	0.188874	0.147738	0.244064	0.274811	0.377102	0.563441	0.391801	0.153604	0.100334	0.123667	0.316354	0.335275	0.388972	0.105275	0.205752	0.210477	0.502345	0.486665	0.470698	0.254696	0.339632	0.206966	0.16944	0.303283	0.287648	1.38135	1.28259	1.28245	0.0696069	0.0694482	0.0327231	0.468012	0.642674	0.675894	0.0748549	0.0606394	0.0203952
Timp2	ENSMUSG00000017466	5.20812	5.20819	5.15161	5.80438	5.63644	5.64554	5.17208	4.97713	4.89542	5.43971	5.17883	5.44084	4.99937	4.86957	5.06409	5.79308	5.52072	5.43898	5.23581	5.08615	5.0295	6.43185	6.40121	6.21536	5.14742	5.29123	5.38627	6.28405	6.12348	6.09524	5.08004	5.16457	5.24714	6.33081	6.33319	6.26405	5.45512	5.47741	5.31943	4.7951	4.87378	4.9719	6.77019	6.84587	6.91391	4.68458	4.74779	4.78966
Rarb	ENSMUSG00000017491	3.43628	3.40298	3.34295	6.19399	6.05629	6.26519	4.18036	4.17212	4.16867	3.15362	3.05016	3.22932	3.52843	3.63893	3.65332	5.17623	5.06765	5.18959	1.47614	1.52907	1.83911	5.37822	5.3727	5.41602	3.85214	4.14796	3.84653	4.5769	4.51182	4.39799	2.46859	2.2623	2.04174	5.1779	5.10536	5.06789	3.86676	3.87203	3.49454	0.896002	1.61409	1.03344	4.31972	4.5851	4.11646	2.96365	3.34336	3.22569
Igfbp4	ENSMUSG00000017493	7.50844	7.34852	7.58331	9.79633	9.59312	9.67963	8.39071	8.31028	7.99014	9.53447	9.19989	9.33211	8.60451	8.54219	8.65963	9.7835	9.57175	9.38584	8.2273	8.04296	8.3604	9.84972	10.004	9.73423	8.2004	8.26224	8.19734	9.63377	9.42035	9.54807	8.46531	8.47713	8.4886	9.29587	9.07027	9.25996	7.34244	7.45968	7.36285	8.03625	7.97598	8.00706	10.0212	10.0074	10.1146	7.65645	7.68791	7.70449
Cdc6	ENSMUSG00000017499	5.05883	5.27	5.10595	5.68951	5.61136	5.69028	5.28266	5.28487	5.29119	5.66871	5.62063	5.60869	5.1167	5.13826	5.05875	5.60852	5.69885	5.75765	4.39135	4.4141	4.58112	5.18411	5.23347	5.03002	4.74566	4.65483	4.52358	5.29872	5.07235	5.22195	4.60545	4.61086	4.56354	5.14567	5.19367	5.19707	4.80078	4.73669	4.70704	4.16347	4.2632	4.3062	4.53753	4.4874	4.50188	4.3888	4.40668	4.40386
Crlf3	ENSMUSG00000017561	4.48233	4.44019	4.43306	5.41329	5.25102	5.55831	4.7484	4.65046	4.65917	5.25816	5.43249	5.28107	4.59802	4.76644	4.52711	5.12614	5.41023	5.58469	4.38834	4.36453	4.47241	5.40697	5.41936	5.33336	4.53797	4.59255	4.64859	5.34478	5.30505	5.36747	4.63406	4.57508	4.69881	5.42808	5.36354	5.36878	4.65326	4.64125	4.5118	4.08946	4.0903	4.01673	5.01754	5.23697	4.94793	3.97788	4.08101	4.01251
Tns4	ENSMUSG00000017607	2.3019	1.92126	2.1086	1.60048	0.822321	1.60967	3.75792	3.73238	3.50601	0.771968	0.950643	0.687832	3.45909	3.48298	3.61261	1.71709	1.26507	1.37553	3.55796	3.88064	3.8014	1.21467	1.04058	0.949483	3.01714	3.22064	3.28638	1.21863	0.935033	0.871179	2.99029	3.28348	3.37239	1.18448	1.06859	1.21022	1.09574	1.29222	1.19737	3.03777	2.83857	2.97007	0.526363	0.407526	0.788397	2.8951	2.69832	2.88303
Abr	ENSMUSG00000017631	5.87079	6.00104	5.82802	5.42531	4.69534	5.25987	5.37719	5.31149	5.14034	5.13492	5.04373	5.04787	5.12234	5.10663	4.97502	5.21882	5.17722	5.33614	4.56213	4.52314	4.52366	5.61656	5.65089	5.50241	4.82764	4.9407	4.77453	5.7985	5.69465	5.67521	4.75483	4.79417	4.7309	5.77289	5.85065	5.76058	6.19687	6.19225	6.11058	4.43039	4.63723	4.46848	5.67377	5.74869	5.57565	4.7305	4.79357	4.81964
Rab11fip4	ENSMUSG00000017639	5.24821	5.20541	5.32606	4.61726	4.02143	4.59152	4.97187	4.86605	4.74601	4.57379	4.79562	4.49356	4.811	4.99333	4.79936	4.16477	4.10568	4.16874	4.76112	4.74926	4.81511	4.73925	4.58822	4.50453	4.82742	4.90368	4.71014	4.57337	4.40584	4.60065	4.77188	4.81483	4.7437	4.26784	4.47139	4.2497	5.0541	4.97022	4.87679	4.40556	4.27425	4.12635	4.59238	4.70606	4.15894	4.44528	4.36995	4.24822
Cd40	ENSMUSG00000017652	0.609395	0.750678	0.679218	2.39619	2.43647	2.65169	0.577412	0.716365	0.358963	2.908	2.64312	2.27337	0.419632	0.707503	0.428275	2.49361	2.773	2.5285	0.629016	0.362891	0.619603	2.54215	2.48892	2.17197	0.266796	0.702087	0.506718	2.49658	2.16461	2.30698	0.401953	0.564445	0.593117	2.38948	2.25566	2.23454	0.738003	0.792511	0.72332	0.093061	0.197285	0.15835	2.14298	2.20857	2.30243	0.295724	0.269931	0.197752
Zfp334	ENSMUSG00000017667	4.35176	4.33558	4.29066	4.68415	4.39855	4.743	4.1315	4.18915	4.09266	4.94745	4.97211	4.85105	4.20056	4.23663	4.23999	4.89273	4.91211	4.81262	3.56136	3.6685	3.59015	4.75099	4.70618	4.68214	3.83358	3.9499	3.78046	4.89092	4.80924	4.81627	3.76601	3.82739	3.84731	4.88657	4.93242	4.83552	4.13326	4.16049	4.1374	3.15392	3.19282	3.08203	4.31905	4.31631	4.29167	3.32403	3.23274	3.30259
Wsb1	ENSMUSG00000017677	6.49623	6.5534	6.47465	6.87255	6.68155	6.72938	6.65864	6.71067	6.87895	6.82838	6.86631	6.84319	6.75089	6.75961	6.79992	6.93282	6.84422	6.89838	6.86145	6.88355	7.0452	7.38799	7.1423	7.14295	6.84516	6.84529	7.08073	7.1503	7.06067	7.18142	6.8812	6.88443	7.0061	7.36243	7.18751	7.0684	6.59042	6.52155	6.60117	6.93858	6.91261	7.10231	7.59166	7.43769	7.54938	6.83581	6.57898	6.93485
Rhbdl3	ENSMUSG00000017692	1.33983	1.31347	1.33129	0.278489	0.103377	0.113934	3.36536	3.30609	3.23221	0.748532	0.435823	0.759903	2.31071	2.36548	2.3678	0.245205	0.522973	0.389262	4.14345	3.98923	3.88901	0.713012	0.573909	0.503804	5.38694	5.16847	5.16956	1.45347	1.28078	1.09876	5.36853	5.26341	4.96082	1.35908	1.25134	1.09315	2.27563	2.32455	2.21072	5.53667	5.41571	5.43438	1.37547	1.39175	1.41503	5.5927	5.67713	5.49918
Ada	ENSMUSG00000017697	3.42145	3.66201	3.59433	3.51823	3.52742	3.2154	2.50579	2.33353	2.60799	3.42368	3.217	3.35259	2.24384	2.40843	2.23442	3.57362	3.38905	3.42758	1.82129	1.40692	1.77154	2.95177	3.19726	3.03346	1.87114	1.7824	1.66973	3.12777	3.04257	3.10581	1.92013	1.83179	2.00778	3.35343	3.28716	3.43419	3.89055	3.93007	3.8019	1.54406	1.59109	1.51146	2.65291	2.81131	2.75491	1.70454	1.70216	1.50287
Tha1	ENSMUSG00000017713	1.87301	1.7004	1.57322	1.35779	1.6083	1.08064	1.12247	1.33286	1.04491	1.43889	1.26119	0.91461	1.07354	1.02924	1.27769	1.83943	1.01062	1.04766	0.901156	0.890334	0.979581	0.965806	1.04647	0.840765	0.747315	0.858233	0.990092	0.934289	0.939895	0.991529	0.844468	1.24994	1.02729	0.890279	0.715635	1.05003	1.91035	1.97898	1.88274	0.838313	0.993151	0.953598	1.2723	1.18609	1.05026	1.51309	1.07832	1.14267
Birc5	ENSMUSG00000017716	7.66627	7.9183	7.98631	8.4531	8.91546	8.47306	7.56504	7.81813	7.84041	8.46648	8.31859	8.37117	7.65318	7.68805	7.68414	8.35891	8.40302	8.42438	7.42688	7.30917	7.45253	7.97101	8.10847	7.89649	7.44876	7.44931	7.42028	8.0576	7.96176	8.07682	7.52034	7.47767	7.57005	8.17895	8.09842	8.15812	7.71734	7.65026	7.60686	7.40438	7.39678	7.36208	7.63402	7.56471	7.77682	7.73631	7.69954	7.60164
Pigt	ENSMUSG00000017721	6.19019	6.20579	6.12806	5.72062	5.28174	5.61022	6.35459	6.19582	5.85018	5.50889	5.54208	5.38763	6.08429	6.01053	6.268	5.15676	5.37721	5.38237	6.23159	6.17011	6.3002	5.46315	5.45853	5.26811	6.18237	6.13421	6.00391	5.45534	5.19708	5.27867	6.13803	6.18064	6.06823	5.43498	5.33247	5.26922	6.09423	6.0062	6.0418	6.29181	6.32134	6.36872	5.67196	5.75672	5.74385	6.05706	6.20196	6.23892
Wfdc2	ENSMUSG00000017723	8.01553	8.09173	8.14846	4.68924	5.26588	4.66535	7.6175	7.54905	7.40649	4.31809	4.18732	4.2888	7.38958	7.33493	7.39777	3.7684	4.17758	3.80322	6.71068	6.39846	6.67916	4.94628	5.08561	4.7522	7.76738	7.7009	7.49922	4.5075	4.61399	4.7939	6.78443	6.83397	7.04484	4.45321	4.30877	4.82019	8.37327	8.28444	8.27178	5.45675	5.58026	5.58147	4.2517	4.42089	4.29938	6.4503	6.32648	6.36488
Etv4	ENSMUSG00000017724	5.85932	5.70976	5.66912	6.24496	5.81488	6.11412	5.58718	5.4259	5.1171	5.64836	5.66705	5.46603	5.71888	5.46731	5.85087	6.04271	5.46932	5.46016	3.94265	3.73176	3.99531	5.85409	6.09393	6.08515	3.84697	3.96504	3.87804	5.4366	5.23219	5.40453	5.21445	5.20313	5.37025	4.90463	4.90096	5.24028	4.90104	5.03063	5.26438	4.90506	4.74873	4.93673	4.82046	5.04912	4.70913	3.99449	3.35034	3.72914
Dbndd2	ENSMUSG00000017734	2.12072	2.53137	2.94527	0.965884	2.11195	1.49092	2.28083	2.15092	2.14345	1.31062	0.341061	0.568149	2.42434	2.40552	2.45535	1.24155	1.48071	0.225454	2.7754	1.96643	2.46505	1.88846	2.31586	1.77565	2.72483	1.73767	2.55656	1.90595	1.5689	1.84619	2.83288	2.34695	2.37297	2.25704	0.933747	2.06548	3.71527	3.59694	2.76749	2.72853	1.89844	2.68405	1.36454	1.51405	2.19888	2.40066	2.7734	1.6103
Mmp9	ENSMUSG00000017737	0.0826842	0.0371002	0.0329243	0.132128	0.150444	0	0.147231	0.0375907	0	0.195423	0.192613	0.279511	0.0662911	0.119959	0.0113005	0.0811194	0.0109622	0.297641	0.245563	0.1233	0.504661	0.556633	0.345461	0.249451	0.140253	0.206767	0.158496	1.13919	0.737604	0.694732	1.06311	0.517418	0.406673	0.39392	0.203803	0.11717	0.141163	0.158095	0.0633299	0.762905	0.877513	0.72387	1.70138	1.77512	1.81102	0.458522	0.173944	0.431659
Slc12a5	ENSMUSG00000017740	1.11141	1.17174	1.14051	0.770312	0.668748	0.965754	1.48316	1.23982	1.20348	0.78939	0.819523	0.710699	1.36861	1.41006	1.50345	1.11475	0.824021	0.865837	1.24785	1.31156	1.43847	1.54012	1.52583	1.26097	1.28682	1.65857	1.45793	1.18504	0.993453	1.13857	1.40667	1.38781	1.34942	1.25309	1.20064	1.01343	1.27196	1.11574	1.14901	1.82363	1.67139	1.52737	1.64985	1.59104	1.62366	1.70957	1.32653	1.8537
Ghdc	ENSMUSG00000017747	2.6631	2.54239	2.48006	2.216	2.25376	2.22933	2.58318	2.4579	2.19411	2.31633	1.89514	2.0751	2.4229	2.41985	2.42209	2.63484	2.29262	2.26343	2.61486	2.48415	2.56747	2.59228	2.80654	2.65449	2.71304	2.51784	2.34448	2.67396	2.52005	2.48544	2.65494	2.70355	2.67469	2.657	2.57799	2.46313	2.71682	2.82345	2.62836	2.46486	2.61052	2.5701	2.94964	3.11292	3.04207	2.64439	2.62233	2.60497
Pltp	ENSMUSG00000017754	5.55215	5.31174	5.24103	2.46578	2.4401	2.57024	6.88727	6.635	6.37807	1.44442	1.29469	1.29661	6.56448	6.46484	6.55999	1.57804	1.5034	1.18788	7.21987	7.0961	7.25822	2.69124	2.5787	2.60695	7.20061	7.18633	7.30094	2.52622	2.23006	2.34142	7.20509	7.23095	7.20644	3.22374	3.00886	2.89184	5.20744	5.24545	5.38062	6.81228	6.95391	7.08451	3.6526	3.7917	4.08924	6.75124	6.83183	6.99135
Slc12a7	ENSMUSG00000017756	5.18444	5.20388	5.13816	5.14377	4.6755	5.03196	5.06608	5.0658	4.81499	5.17782	5.17525	5.02521	5.03558	5.03453	5.09462	5.01193	5.02721	4.97095	4.70554	4.78034	4.84601	5.15902	5.09592	4.93783	4.68555	4.76556	4.63881	5.20245	4.97186	5.0977	4.69687	4.76438	4.7073	5.11895	5.29157	5.1173	5.30009	5.31423	5.25106	4.09484	4.28377	4.37965	4.66866	4.68845	4.85302	4.22041	4.12869	4.34075
Slc12a4	ENSMUSG00000017765	4.67223	4.69574	4.68175	4.03866	3.56213	3.83157	5.91454	5.86039	5.68559	3.7799	3.90239	3.76198	5.71515	5.73149	5.76927	3.50627	3.76524	3.64662	5.87972	5.92924	5.97162	4.37749	4.31929	3.95808	5.94569	6.07791	6.10665	4.53826	4.35063	4.27935	6.05257	6.05587	5.98055	4.52087	4.47235	4.32411	4.84097	4.71236	4.81331	5.90188	6.06955	6.07697	4.78661	4.93725	4.78954	6.06864	5.85146	6.16792
Myo1c	ENSMUSG00000017774	3.55868	3.51696	3.48586	3.86409	3.423	3.80094	4.39829	4.3289	4.11053	3.66819	3.61361	3.61305	4.02721	4.01685	4.15096	4.09689	3.64252	3.59585	4.72268	4.6938	4.84723	4.40964	4.34759	4.01212	4.76506	4.70937	4.56544	4.43073	4.09886	4.161	4.58186	4.47394	4.41971	4.41338	4.23298	4.15513	3.77667	3.66765	3.52836	4.91437	4.92419	4.92992	4.86975	4.98045	4.98238	4.96235	5.14221	5.11483
Jph2	ENSMUSG00000017817	0.902298	0.852216	0.99282	1.12776	0.81587	1.13103	1.55747	1.54798	1.48346	1.7756	1.60328	1.66092	1.90206	1.94314	1.95446	2.21353	1.86043	1.83069	0.395007	0.347034	0.592202	1.11594	1.10138	1.12757	0.656024	0.780161	0.90632	1.59897	1.4749	1.61853	0.611489	0.739486	0.872777	1.29903	1.41621	1.40481	0.313908	0.342323	0.381904	0.0938584	0.154559	0.0883232	1.02688	1.00087	0.872916	0.118192	0.056297	0.185527
Mybl2	ENSMUSG00000017861	4.94465	5.0681	5.06444	5.7193	4.80669	5.81224	4.9996	5.25127	4.95787	5.31596	5.43726	5.32054	4.95782	4.79342	4.7061	5.70085	5.58752	5.53083	4.79098	4.70656	4.79342	5.03505	5.16122	4.9383	4.84416	4.64436	4.70453	4.81443	4.80747	4.9814	4.59642	4.6504	4.7142	4.85516	5.08923	4.99631	4.87996	4.74505	4.54109	4.48524	4.35435	4.31872	4.48509	4.47693	4.36369	4.59625	4.51767	4.58404
Eya2	ENSMUSG00000017897	7.65348	7.6938	7.68075	5.79001	5.30876	5.74504	5.54865	5.26172	4.90405	3.74789	3.72413	3.5673	6.1963	6.2022	6.33337	3.26381	3.62707	3.50011	5.33092	5.32662	5.4336	5.08224	5.15541	4.93901	4.61226	5.00335	4.59371	4.60557	4.51948	4.64763	5.81667	5.81259	5.93446	3.59357	3.42812	3.50608	7.86048	7.84069	7.83453	4.82723	5.04725	4.90778	5.42984	5.77977	5.36793	3.94499	4.082	4.55209
B4galt5	ENSMUSG00000017929	4.25864	4.06926	4.15534	4.24386	3.48981	3.80695	2.87177	3.27521	3.10373	4.39968	3.95074	4.02937	3.03442	3.19556	3.39548	4.08368	4.26033	3.97263	2.47423	2.5689	2.58744	4.16292	4.25456	4.07271	3.02534	2.80153	2.96038	4.53956	4.39247	4.44562	2.97264	2.91832	2.7634	4.27086	4.21576	3.94087	4.52315	4.67803	4.50852	2.08359	2.43563	2.47189	4.16488	4.14841	4.12445	2.4096	2.61812	2.35471
Gdap1l1	ENSMUSG00000017943	3.99823	3.87013	3.93839	1.5668	1.44069	1.47814	1.2182	1.01809	0.755855	0.729218	0.662887	0.503894	0.995331	1.2587	1.18508	0.905342	0.878182	0.599855	0.566861	0.620442	0.801213	0.539253	0.487015	0.546697	0.448004	0.312802	0.430203	0.910773	0.645483	0.714042	0.398884	0.79266	0.418999	0.681192	0.82967	0.487225	4.70839	4.68926	4.54248	0.455923	0.402842	0.529432	0.711109	1.13829	0.70705	0.285471	0.301183	0.344091
Ptgis	ENSMUSG00000017969	3.56735	3.27105	3.44055	3.65296	3.9051	3.5451	2.73175	2.60136	2.4731	3.54006	3.46731	3.53114	2.87792	2.81172	2.84197	3.62047	3.41291	3.327	1.05759	0.995194	1.43833	3.38241	3.4344	3.2346	0.607487	0.763785	0.895701	3.93168	3.74843	3.4826	0.864288	0.985943	1.14101	2.53928	2.28281	2.46242	2.70952	2.86806	2.8563	0.062045	0.217784	0.18425	2.57079	2.71536	2.6959	0.171484	0.0621886	0.093811
Cadps2	ENSMUSG00000017978	2.65408	2.80741	2.78174	0.494467	0.288787	0.444012	0.779831	0.963559	0.793344	0.314652	0.428038	0.389906	1.54937	1.43425	1.51364	0.383216	0.417688	0.385152	1.00048	0.918778	0.940358	0.835032	0.6829	0.595157	0.932441	0.732553	0.902821	0.45321	0.487037	0.475888	1.18973	1.26227	1.48544	0.288539	0.337568	0.35367	3.96842	3.95277	3.88012	0.501683	0.679017	0.640827	1.43124	1.64997	1.4377	0.370579	0.580592	0.307742
Cyth3	ENSMUSG00000018001	4.81985	4.81774	4.79665	5.34455	4.96666	5.28191	4.40348	4.21662	4.25916	5.41925	5.45571	5.40497	4.24874	4.28882	4.23885	5.59083	5.42528	5.5787	4.55555	4.56992	4.60831	5.35944	5.40571	5.18177	4.67528	4.65607	4.6013	5.35101	5.2086	5.35192	4.53578	4.48481	4.48857	5.20162	5.21321	5.16767	4.89875	4.88416	4.76787	4.75289	4.74436	4.63722	5.28188	5.31333	5.11763	4.7841	4.75054	4.69086
Cyth4	ENSMUSG00000018008	0.270578	0.217371	0.202889	1.98581	1.92068	1.97129	0.0552466	0.0412542	0.0548582	1.5492	1.45627	1.58427	0.199539	0.144379	0.261129	1.9355	1.93242	1.98835	0.434613	0.352	0.244451	1.87368	1.87338	1.55544	0.176066	0.192067	0.210183	1.98615	1.75849	1.8468	0.22242	0.191995	0.190847	1.84134	1.55073	1.53235	0.84669	0.729474	0.688564	0.378172	0.206954	0.362225	1.66689	1.68547	1.5816	0.0955526	0.16247	0.198592
Rac3	ENSMUSG00000018012	5.72894	5.66778	5.76014	4.69482	3.95621	4.73858	6.65705	6.46031	6.26881	4.23247	4.32918	4.25793	6.36121	6.20996	6.40062	4.10359	4.51446	4.5124	6.58658	6.43903	6.75677	5.77977	5.84767	5.53146	6.71515	6.56116	6.5234	5.04298	4.9144	5.11779	6.75784	6.66255	6.81657	5.60543	5.30288	5.52369	5.93883	5.92944	5.96181	6.56387	6.51542	6.55952	5.84876	5.88572	5.95512	6.54749	6.63524	6.54945
Cyb5r3	ENSMUSG00000018042	7.64326	7.61322	7.55741	6.5187	6.39003	6.29047	7.61146	7.426	7.16146	6.2968	6.20669	6.08608	7.45592	7.52367	7.54277	6.42497	6.272	6.15308	7.3558	7.3683	7.43888	6.50822	6.5006	6.43622	7.31824	7.31662	7.31255	6.21544	6.12237	6.1407	7.32622	7.37192	7.39245	6.37577	6.39955	6.32763	7.50829	7.46035	7.49759	6.95622	6.97425	7.08566	6.23119	6.19973	6.39892	7.08018	7.23977	7.14677
Med13l	ENSMUSG00000018076	3.77729	3.80223	3.74677	4.12591	3.20662	3.98889	3.98056	3.97459	3.80436	3.45792	3.41681	3.36471	3.99146	4.00109	4.08947	3.81834	3.8154	3.83252	4.68068	4.65332	4.66861	4.31803	4.15429	3.99064	4.46546	4.41985	4.33241	4.08115	3.81445	3.85589	4.59464	4.57665	4.54314	4.02804	4.21302	3.89219	3.81081	3.85664	3.70347	4.87944	4.67758	4.76048	4.32877	4.18736	4.09805	4.42336	4.37905	4.37963
Hist1h2bc	ENSMUSG00000018102	4.51475	4.47175	4.42467	2.75638	2.97225	2.59617	4.21183	4.3473	3.91059	3.22029	3.11806	3.09729	4.43319	4.44987	4.47619	2.92308	3.12816	2.88524	4.49786	4.50705	4.28763	3.52347	3.63566	3.60107	4.51685	4.5217	4.41355	4.36248	4.23373	4.05544	4.45403	4.3878	4.3847	3.83995	3.629	3.74176	5.35874	5.3095	5.16313	4.82069	4.93956	4.71898	3.93967	4.09395	4.11408	5.17055	5.29786	5.38155
Baiap2l2	ENSMUSG00000018126	2.17465	0.891659	1.47416	1.89825	2.52958	1.83365	0.986203	1.03254	1.32774	1.295	0.825258	1.65332	1.16769	0.826139	1.15675	2.51058	0.843323	0.939651	2.01442	1.73202	2.12342	3.33239	3.75593	3.53063	1.26346	1.7441	1.39059	2.01629	1.96052	2.22764	1.53565	2.12681	1.35237	2.87234	2.99484	3.56641	1.14688	1.51061	1.82131	2.43441	2.9016	2.46886	3.59339	3.74758	3.65594	2.4158	2.5675	2.28617
Mafk	ENSMUSG00000018143	2.8522	2.66574	2.64438	2.34021	2.28734	2.35898	3.00983	3.11461	2.90257	2.47777	2.36738	2.47415	3.04026	2.94049	3.13945	2.57455	2.45986	2.35645	3.8067	3.57589	3.8914	2.24505	2.23156	2.1483	3.58501	3.32635	3.29101	2.65883	2.39887	2.53751	3.49063	3.38222	3.31935	2.32956	2.07126	2.23818	3.052	2.80746	2.83527	4.06714	3.97192	3.97581	2.2412	2.31993	2.1796	3.59611	3.43023	3.67645
Med1	ENSMUSG00000018160	4.62622	4.98715	4.82392	5.32272	4.55559	5.0697	4.78023	4.78984	4.65264	5.15715	5.2062	4.89283	4.54124	4.67117	4.58581	5.18103	5.18168	5.21892	4.90489	4.8914	4.75686	5.27728	5.09666	5.18167	4.81856	4.83639	4.81182	5.08821	5.00562	4.99738	4.89968	4.9058	4.81627	5.02443	5.16884	5.07599	4.73891	4.81591	4.70547	4.52182	4.54633	4.53583	4.92445	4.783	4.80805	4.37477	4.51372	4.50426
Erbb3	ENSMUSG00000018166	5.46438	5.41088	5.29739	3.16329	2.70165	3.30473	4.90386	4.82751	4.77379	0.46868	0.53713	0.657651	5.12147	5.15337	5.09145	1.34512	1.87457	1.5738	5.51495	5.49648	5.45838	3.43395	3.23517	3.00505	5.39802	5.36308	5.279	2.97944	2.73042	2.23526	5.24082	5.31267	5.23174	2.60944	2.6313	2.34482	5.83951	5.8609	5.75801	5.09731	5.17632	5.27791	3.34171	3.48862	3.28363	5.18023	5.21704	5.26335
Ikzf3	ENSMUSG00000018168	0.352429	0.282509	0.102346	0.0317873	0	0	0.448238	0.261918	0.456786	0	0.0794426	0.094324	0.260803	0.184605	0.296715	0.172694	0	0	0.702888	0.549834	0.673713	0.0790732	0.279514	0.108333	0.881962	1.10067	0.854077	0.212635	0.0720597	0.252014	0.853353	0.99527	0.788618	0.0611874	0.151619	0.0710065	0.226644	0.684524	0.19307	0.845102	0.698378	0.907096	0.236745	0.36396	0.30376	0.703334	1.12016	1.14714
Mfng	ENSMUSG00000018169	6.19098	5.98339	6.10261	3.42713	3.58794	3.51843	0.545741	0.512529	0.313969	2.92972	2.84473	2.77202	1.40002	1.02892	1.02176	2.86447	3.09156	2.93994	0.324738	0.70377	0.3274	3.3626	3.68408	3.32047	0.772366	0.666063	0.609016	3.36742	3.54755	3.32562	0.482556	0.590704	0.463099	3.49477	3.38968	3.29526	6.89023	6.89875	6.85402	0.898929	1.16905	0.830576	3.35967	3.46986	3.39848	0.911397	0.604746	0.935283
Uchl5	ENSMUSG00000018189	6.04734	6.01239	5.99813	5.97275	6.95815	6.31198	6.10954	6.08463	6.30764	6.08206	6.24772	6.21896	5.85569	5.91038	5.8921	6.43617	6.21975	6.33028	5.79607	5.79279	5.79233	5.45107	5.56483	5.44457	5.83213	5.84601	5.85191	5.57734	5.5354	5.72347	5.8444	5.80532	5.76342	5.73802	5.60159	5.60785	5.78368	5.70845	5.69325	5.73607	5.69648	5.69182	5.10865	5.13203	5.12575	5.82601	5.77365	5.6782
Stk4	ENSMUSG00000018209	5.48788	5.58939	5.50935	5.2938	5.01822	5.21276	5.41087	5.48585	5.49144	5.15886	5.2504	5.22762	5.33853	5.40141	5.40074	5.28987	5.2832	5.2831	5.3709	5.39804	5.4115	4.84212	4.76006	4.60188	5.34976	5.32413	5.27072	4.8934	4.72608	4.85694	5.36931	5.31912	5.33679	4.80874	4.86757	4.79437	5.51864	5.43372	5.41472	5.21274	5.14415	5.21204	4.73028	4.65318	4.73361	5.12364	5.17623	5.11527
Pmp22	ENSMUSG00000018217	2.45983	2.69675	2.51307	3.28757	3.56662	3.32403	5.54825	5.58775	5.63826	4.50542	4.46783	4.44389	4.09315	4.29951	4.23383	3.06334	2.81103	2.90851	1.66066	1.57725	2.10174	4.71078	4.57188	4.31367	1.20953	1.67692	1.86234	5.94162	5.65897	5.6776	1.18819	1.47927	1.93907	4.58188	4.39852	4.16248	0.951065	0.973926	0.504492	0.664324	0.877894	0.818456	5.57686	5.57513	5.70973	0.602547	0.467935	0.402675
Gdf9	ENSMUSG00000018238	0.699851	0.71743	0.443725	1.04927	1.06283	0.800833	0.876076	0.28659	0.40973	0.594139	0.695939	1.13893	0.64409	0.146872	0.12106	0.954627	0.524855	0.702951	0.136031	0.115069	0.329211	1.35912	0.985073	0.637033	0.0636563	0.139781	0.162008	1.07833	0.869046	1.32846	0.11267	0.167787	0.178008	1.12759	1.36953	0.958481	0.643958	0.344777	0.504053	0.450229	0.159937	0.33597	1.20066	1.04159	1.23977	0.151142	0.102988	0.171099
Zcchc10	ENSMUSG00000018239	4.3196	4.37161	4.4334	4.69468	4.7913	4.91154	4.39815	4.44039	4.48052	4.81519	4.79267	4.89097	4.27543	4.29879	4.35871	5.0743	4.86505	4.94773	4.17932	4.09289	4.05926	4.44043	4.39107	4.21104	4.29385	4.35084	4.23843	4.4727	4.35753	4.54585	4.29006	4.29648	4.4593	4.60656	4.47453	4.544	4.24543	4.16409	4.13014	4.07926	3.9243	4.00624	4.43871	4.30914	4.33723	4.31195	4.17867	4.17689
Tbx5	ENSMUSG00000018263	0	0.0090163	0	0.0492242	0	0.0101537	0	0	0	0.0104375	0.108355	0.0359235	0	0.00955176	0	0	0	0	0	0	0	0.027689	0.00962466	0.0179505	0	0	0	1.21875	0.570236	0.479907	0.00831511	0	0	0.139851	0.0629958	0.130025	0	0	0	0	0	0.00839194	0.227352	0.245369	0.284533	0.0387362	0	0.0105331
Pfn1	ENSMUSG00000018293	9.98369	9.93441	9.86099	10.5856	10.7558	10.5259	9.81474	9.77483	9.63761	10.4291	10.2986	10.3084	9.7468	9.62386	9.8563	10.4713	10.3961	10.3895	9.49819	9.41673	9.63665	10.1711	10.3498	10.213	9.52388	9.56565	9.37662	10.1248	10.057	10.129	9.70613	9.6008	9.7106	10.0968	9.91188	10.1024	9.74235	9.77619	9.83205	9.55849	9.78513	9.57306	9.77576	9.83674	9.8933	9.4323	9.45833	9.72697
Tomm34	ENSMUSG00000018322	5.21893	5.33029	5.31839	5.17573	5.07448	5.0329	4.87175	4.92064	4.8151	5.27829	5.1201	5.14997	4.8143	4.91836	4.87965	4.89082	5.08762	5.01467	4.80999	4.83519	4.87465	4.95355	4.91987	4.97268	4.86483	4.91875	4.85884	5.2506	5.15517	5.25145	4.74225	4.91717	4.79835	5.0526	5.1065	5.01994	5.69708	5.60634	5.63633	4.55075	4.69725	4.64769	4.89796	4.89804	5.11414	4.71638	4.65904	4.8757
Ksr1	ENSMUSG00000018334	2.01799	2.13278	2.16447	2.71959	2.34404	2.65093	2.02876	1.96128	1.79391	2.38001	2.36171	2.38404	1.85454	1.82574	1.97114	2.72648	2.51852	2.36969	2.04323	2.01786	2.05214	2.98124	2.97158	2.8045	2.13901	2.11544	1.97385	2.91915	2.76613	2.74106	2.08483	2.18332	2.08921	2.84296	2.80275	2.67845	2.2289	2.19659	2.12913	2.24768	2.25621	2.10712	2.98154	2.98536	2.89622	2.38272	2.28705	2.39672
Gpx3	ENSMUSG00000018339	5.69406	5.91198	6.05626	6.54001	6.97976	7.37486	6.21251	5.87032	5.22494	8.01018	6.39578	6.32087	6.06204	5.9418	5.8184	5.36178	6.73139	6.16858	3.94318	3.90549	3.59741	6.4195	6.99834	6.41392	3.89691	4.3209	4.54625	5.8844	6.1991	6.24765	4.66903	4.61146	4.89089	5.8982	6.02198	6.30275	5.08949	5.07752	5.49086	2.88469	3.44948	2.98181	5.76166	5.80664	5.9808	2.38609	3.26745	3.38549
Anxa6	ENSMUSG00000018340	3.75595	3.61692	3.59273	5.01832	4.89496	4.98052	3.99401	3.81436	3.68167	4.91794	4.90089	4.82329	4.20727	4.25646	4.20014	4.64828	4.66697	4.68653	4.53039	4.35544	4.47536	6.01527	5.90762	5.67711	4.53766	4.27918	4.43759	6.34818	6.02241	5.89675	4.86638	4.75672	4.7557	5.85724	5.47869	5.43767	4.78168	4.73635	4.47572	4.84801	5.02766	5.086	6.52555	6.65736	6.87723	5.20851	5.38069	5.42514
Kpna2	ENSMUSG00000018362	6.42976	6.88802	6.716	6.95644	6.42138	6.81724	6.30219	6.49137	6.33651	6.98796	6.98791	6.75594	6.18109	6.21951	6.26341	6.32486	6.71522	6.85172	5.97025	6.01003	5.97985	6.22476	6.23481	6.17721	5.97675	5.82212	6.0296	6.25572	6.22674	6.23552	5.96156	6.07066	6.08405	6.38678	6.44724	6.41191	6.42041	6.31813	6.20598	5.59529	5.66292	5.81288	5.68558	5.65584	5.5493	5.75906	5.80809	5.64421
Cuedc1	ENSMUSG00000018378	5.14141	5.01819	5.05861	4.56003	4.11315	4.29854	5.52787	5.32852	5.27641	4.0351	3.88291	4.12847	5.45662	5.4025	5.55817	4.29068	4.12248	3.93293	5.11954	5.08929	5.3009	4.65259	4.69829	4.39647	5.63674	5.69705	5.58941	4.68696	4.40044	4.55041	5.58101	5.62599	5.6182	4.65265	4.5192	4.38024	5.02864	4.97537	5.04018	5.37102	5.49064	5.39191	4.89151	5.0098	4.87418	5.78715	5.53993	5.75879
Abi3	ENSMUSG00000018381	0.139873	0.0591268	0.141074	2.18579	2.0412	2.08772	0	0	0.0622329	1.79176	1.50798	1.76137	0.0163832	0.0595227	0.11011	2.45623	1.90426	2.27241	0.0809801	0.0484137	0.0663793	1.80564	2.04369	1.66866	0.116298	0.107682	0.0591829	2.15141	2.13242	1.86482	0.271681	0.0668744	0.0443172	1.91089	1.92254	1.68435	0.482859	0.476	0.250164	0.0771646	0.162666	0.158218	2.06774	1.94734	1.83568	0.172983	0.343998	0.0448217
Shroom1	ENSMUSG00000018387	1.59496	1.41996	1.35027	0.982795	0.83141	0.997685	0.54771	0.393078	0.427289	1.04445	0.861488	0.838177	0.738541	0.830487	0.764574	0.945663	1.14529	0.880245	0.32464	0.427153	0.604581	2.26398	2.28537	1.91011	0.154294	0.388803	0.336104	1.66976	1.26217	1.68518	0.220031	0.307198	0.317691	1.7239	1.60118	1.68633	1.4456	1.44336	1.42161	0.353601	0.207617	0.254476	2.82427	2.74636	2.74944	0.144508	0.0647471	0.133121
2019-09-08	ENSMUSG00000018398	4.85702	4.86333	4.92998	5.26457	4.70725	5.16394	4.42423	4.30604	4.39162	5.16037	5.20459	5.12236	4.55775	4.53849	4.59736	4.98291	5.02385	5.04716	4.99519	4.87752	4.90319	5.70303	5.60234	5.36745	5.01514	4.86137	4.72625	5.76485	5.60937	5.63428	5.2612	5.18878	5.07299	5.71099	5.68807	5.56376	4.75344	4.73809	4.57792	5.57859	5.5069	5.54824	6.14902	6.09985	6.12948	5.29516	5.45863	5.35881
Mrm1	ENSMUSG00000018405	4.15596	3.10525	3.42968	2.63942	2.80303	2.82054	4.21147	3.14989	3.88676	2.57617	2.43674	2.52614	2.96186	2.99488	3.21018	2.56338	2.37743	2.30148	3.87325	3.95476	4.13213	3.0724	2.82717	3.19044	4.16527	4.1101	4.1081	3.5964	2.70333	3.00638	3.98552	3.90724	4.00148	2.45454	2.5139	2.59099	4.08501	3.90924	4.16848	3.93457	4.24422	3.84427	2.7973	2.76714	2.62911	4.29706	3.9817	4.12305
Mapt	ENSMUSG00000018411	2.22403	2.41175	2.35639	1.3155	1.29621	2.07023	1.77942	1.90049	1.14183	0.594422	0.640881	0.835577	1.56572	1.50356	1.75429	1.84883	1.33189	0.731432	1.78304	1.90399	1.73977	1.78194	1.38128	1.3516	2.48066	1.9851	2.18084	0.642282	0.57975	0.550574	2.21085	1.92451	1.8749	1.33219	0.757886	1.05871	3.93075	3.80639	3.56539	2.93837	2.84375	2.84372	1.91744	1.97244	1.75368	3.00589	3.30824	3.37696
Gid4	ENSMUSG00000018415	5.66997	5.70482	5.76664	4.88292	4.72461	5.00592	5.29568	5.35303	5.38122	5.09093	4.96552	5.05755	5.4956	5.47957	5.51026	5.06027	5.04742	5.07105	5.06954	5.04222	5.02477	4.66841	4.69242	4.42522	5.28881	5.29831	5.1371	4.84346	4.74747	4.75513	5.17571	5.18045	5.16098	4.79691	4.77691	4.69723	5.43636	5.4413	5.36798	4.93517	4.96392	4.89466	4.75293	4.74867	4.66342	5.11205	5.14979	5.07328
Ypel2	ENSMUSG00000018427	1.86134	1.82581	1.98284	2.29785	1.87329	2.3911	1.39883	1.29375	1.43819	1.84062	1.72188	1.89807	1.79228	1.72385	1.91752	2.07613	1.98895	1.99994	3.23474	3.18328	2.93776	3.60638	3.35458	3.15025	2.43357	2.50812	2.48621	3.04668	2.75841	2.801	2.86087	2.80976	2.73529	2.84051	2.71873	2.46521	2.81605	2.7356	2.55966	2.9211	2.77989	2.77238	3.91473	3.90722	3.70308	2.14231	2.20001	2.19905
C1qbp	ENSMUSG00000018446	8.32894	8.27897	8.24896	8.61888	9.02604	8.65233	8.21325	8.18642	8.27013	8.61414	8.74642	8.69882	8.07686	8.03119	7.91858	8.66341	8.62049	8.73115	7.91553	7.87181	8.02714	7.83243	7.93093	7.86199	8.00981	8.03277	8.1041	8.02764	7.97314	8.12691	8.01096	7.96739	8.136	7.91834	7.82927	8.07177	8.0628	8.06297	8.08172	8.08916	8.10554	8.19807	7.49527	7.56488	7.63665	8.15521	8.09711	8.09108
6330403K07Rik	ENSMUSG00000018451	6.17376	6.07212	6.22238	5.89578	6.14461	5.86725	6.53929	6.39339	6.33821	6.35334	6.04585	6.23996	6.84477	6.71528	6.84731	5.94714	5.87166	5.96423	7.4284	7.27822	7.35931	7.43657	7.45427	7.33694	7.51156	7.45072	7.52614	7.56538	7.44246	7.47946	7.62742	7.62393	7.58192	7.59505	7.32618	7.4556	7.16947	7.08215	7.06649	7.03048	7.10358	7.15652	7.66904	7.67163	7.80889	7.2194	7.17937	7.20511
Slc13a3	ENSMUSG00000018459	0.315981	0.276051	0.294493	0.12106	0.155153	0.0379547	0.853203	0.998754	0.659769	0.181628	0.16818	0.157938	1.1557	0.678183	1.15769	0.186854	0.0537862	0.310344	0.667925	0.538479	0.886267	0.133871	0.0735249	0.163432	0.114862	0.210118	0.173545	0.0985543	0.144999	0.0674504	0.0702824	0.21039	0.250217	0.0483138	0.0696039	0.071716	0.0774322	0.138866	0.124397	0.0646619	0.074869	0.040295	0.0417119	0.0343022	0.0369163	0	0	0.01263
Kcnab3	ENSMUSG00000018470	0.91166	1.07075	1.01547	0.484182	0.877644	0.481817	0.295649	0.37938	0.420504	0.43595	0.660132	0.733149	0.650673	0.477266	0.630707	0.804612	0.541268	0.465857	0.474605	0.527744	0.423234	0.948935	1.00981	0.86319	0.537909	0.396597	0.436362	1.04564	0.861038	1.15061	0.513412	0.580791	0.545042	1.3593	1.05507	0.98434	1.31243	1.40742	1.18786	0.523498	0.577374	0.624168	1.6842	1.49154	1.79661	0.693352	0.575872	0.735046
Chd3	ENSMUSG00000018474	7.85191	7.59275	7.52264	6.58865	5.90254	6.35064	7.47553	7.31421	7.10529	6.91272	6.99975	6.87576	7.39958	7.25644	7.45666	6.32969	6.36993	6.2776	8.09765	8.05539	7.98498	8.04374	7.92076	7.70379	8.34719	8.29428	8.24066	8.42739	8.17321	8.16501	8.3163	8.28581	8.16843	8.24569	8.18585	7.95251	8.43227	8.40629	8.36286	8.61007	8.71264	8.60098	8.89038	8.87232	8.80102	8.88612	8.77434	8.94329
Wnt9b	ENSMUSG00000018486	4.93026	4.80983	4.88881	0.0339493	0.0255489	0.0259168	6.00917	5.92345	5.72441	0.0431939	0.0835558	0.0815511	5.76522	5.77305	6.01224	0	0.483397	0.0491432	7.4842	7.55581	7.54196	0.0548257	0.0963154	0.0888394	6.83857	6.89575	6.90297	0.0304994	0.00860643	0.151485	7.46826	7.49932	7.40829	0.0411468	0.038723	0.0491681	3.19297	3.32972	3.55601	7.22122	7.11983	7.12804	0.0356031	0.323444	0.0562199	6.40648	6.60206	6.54588
Adora2b	ENSMUSG00000018500	0.247486	0.567583	0.45195	3.34807	3.26323	3.17304	1.2189	1.07711	1.18652	2.79478	2.65623	2.68553	0.99759	0.609002	0.841175	2.94202	2.7916	2.80143	0.960242	0.876845	0.976542	3.33156	3.4264	3.21833	1.30514	1.46488	1.45574	2.79078	2.788	2.70536	1.61771	1.36928	1.19383	2.80992	2.62707	2.82266	1.11629	1.18988	0.902166	2.04831	1.91958	1.83794	2.78978	3.06714	2.75298	1.7128	1.73876	1.83693
Trpv2	ENSMUSG00000018507	1.46372	1.24057	1.48902	0.975946	1.04116	0.857674	0.0391547	0.0435839	0.0146998	0.643912	0.533751	0.490314	0.151412	0.125614	0.0673351	0.668957	0.642477	0.501966	0.0279515	0.146727	0.244254	1.07746	0.989361	1.07431	0.0502959	0.0902199	0.0470724	0.842451	0.733467	0.580981	0.0984512	0.216086	0.132207	1.28189	0.788991	0.673889	2.83464	2.73853	2.47174	0.300092	0.377796	0.31982	1.1386	1.38495	1.28592	0.0724884	0.0413407	0.0159818
Cenpv	ENSMUSG00000018509	5.35193	5.46817	5.37364	6.47303	6.40538	6.42003	3.18764	3.40665	3.24595	5.93692	5.60548	5.71883	3.7268	3.58113	3.70659	5.34754	5.50403	5.66704	2.21362	1.48286	1.95042	5.73973	5.95784	5.92787	2.51349	2.4288	2.74337	6.10588	5.99031	6.0925	2.26462	2.29903	2.85039	5.82428	5.5736	6.0556	5.71176	5.69523	5.67561	1.54022	1.57818	1.54874	5.68326	5.70447	5.85529	1.71861	1.75514	1.48455
Pip4k2b	ENSMUSG00000018547	5.19259	5.15932	5.17849	5.97016	5.55897	5.92244	4.9827	5.00347	4.94748	5.44527	5.50261	5.44725	5.02308	5.01365	5.02088	5.8145	5.71552	5.68882	4.73868	4.71244	4.64999	5.90339	5.88523	5.73715	4.99466	4.90955	4.88429	5.79965	5.6339	5.62696	5.01753	5.06332	5.03769	5.73065	5.74581	5.599	5.10751	5.167	5.06537	4.81414	4.79778	4.81404	5.80992	5.76893	5.72061	4.80677	4.85295	4.7891
Trim37	ENSMUSG00000018548	5.65785	5.63865	5.63318	5.25227	4.93478	5.40914	5.34817	5.36362	5.41811	5.34022	5.40347	5.34991	5.22473	5.18532	5.15603	5.66807	5.32117	5.39702	4.84684	4.76853	4.7661	4.73367	4.70351	4.62891	4.8907	4.77212	4.7283	5.02616	4.85652	4.99993	4.90818	4.8329	4.88473	5.01	4.89182	4.95367	5.69416	5.60659	5.53273	4.64731	4.62597	4.52498	4.31452	4.47573	4.30344	4.67907	4.70606	4.61141
Ybx2	ENSMUSG00000018554	5.324	5.19078	5.19208	3.43679	3.25742	3.27576	4.97491	4.62692	4.75123	3.5894	3.33501	3.93052	5.0791	5.19132	5.31613	3.11059	3.08803	2.94439	4.52713	4.6664	4.60333	4.53009	4.52034	4.17622	4.50322	4.38265	4.38826	4.40061	4.28596	4.42948	4.74386	4.80166	4.7145	4.41128	4.31753	4.36027	4.97252	5.00623	5.08921	4.88127	5.05001	5.07954	4.82537	4.93474	5.21144	5.20634	4.479	5.21977
Slc2a4	ENSMUSG00000018566	3.9123	3.83461	3.60034	3.93161	3.72588	3.91718	3.04554	3.27853	2.97842	3.85449	3.7311	3.74032	3.32468	3.28538	3.39679	4.00895	3.67666	3.64367	3.79365	3.77737	3.77825	4.93742	5.10996	4.77563	3.3885	3.63278	3.4622	4.65434	4.65497	4.69725	3.78065	3.89006	3.87935	5.13962	4.88459	4.91342	4.07578	3.97447	4.13027	3.83481	3.99599	3.86081	4.88025	5.14434	4.85443	3.72751	3.60644	3.92235
Cldn7	ENSMUSG00000018569	7.22969	7.10712	7.11974	0.623294	0.746146	0.635327	7.21876	7.01769	6.8871	0.603731	0.278076	0.459173	7.14628	7.13622	7.11132	1.53351	0.833592	0.110956	7.0888	7.16594	7.44809	1.44967	1.35535	1.03961	6.877	7.01189	7.04892	0.602588	0.535962	1.2787	6.48042	6.63918	6.89844	0.402532	0.462135	0.65342	7.33294	7.33724	7.32318	5.63379	5.6377	5.81429	1.28954	1.89916	1.72605	5.69922	5.4879	5.67859
2810408A11Rik	ENSMUSG00000018570	4.24789	4.23817	4.04864	3.58679	3.46913	3.40485	4.18923	4.37754	4.01248	3.80714	3.9513	3.82398	4.0551	4.12582	4.12913	3.49399	3.25982	3.19867	4.04678	3.96898	4.19401	4.14755	4.33306	4.1274	4.2504	4.14636	4.59804	4.39508	4.31429	4.47601	4.29826	4.29859	4.37953	4.53877	4.32562	4.46311	4.54675	4.50798	4.63471	3.99868	4.01604	4.0573	4.07614	4.01229	4.3313	4.16149	3.97627	4.37626
Acadvl	ENSMUSG00000018574	4.49386	4.38416	4.21858	4.07512	4.0729	4.04141	4.09787	3.94638	3.77411	4.09646	4.25313	4.17809	3.91899	4.0008	3.88904	4.32329	3.91991	4.00487	4.6837	4.46853	4.63302	4.92299	4.96986	4.6573	4.44533	4.2817	4.60299	4.73803	4.70653	4.70807	4.51515	4.55213	4.56153	4.84884	4.71764	4.84144	5.02799	5.02418	4.8964	4.4711	4.50447	4.54496	4.84567	4.94379	4.9284	4.41071	4.47215	4.3547
Atox1	ENSMUSG00000018585	7.77354	7.75802	7.7848	6.46364	6.90664	6.58723	8.00176	7.82797	7.74529	6.63296	6.50011	6.56312	8.05446	8.03201	8.072	6.59058	6.55859	6.70002	8.44231	8.29471	8.52946	6.96444	7.16522	7.09469	8.51417	8.39136	8.39579	7.03958	7.01371	7.05928	8.56011	8.43918	8.59373	7.10179	6.85529	7.06192	8.53169	8.42275	8.44629	7.8382	7.88493	7.99372	6.34284	6.55557	6.49167	8.10321	8.02857	7.97098
Sparc	ENSMUSG00000018593	6.66713	6.78276	6.77735	7.02613	6.9657	6.82857	7.32998	7.27301	7.12895	6.41388	6.16796	6.34355	7.62764	7.54996	7.60973	5.83933	5.89833	5.85572	8.0088	7.80782	7.85853	7.81058	7.69594	7.38739	7.96596	7.92838	7.82855	7.93247	7.75621	7.48618	8.16057	8.15381	8.06382	7.9724	7.63091	7.457	7.57789	7.4909	7.46872	8.28545	8.3771	8.60789	8.66842	8.6983	8.94981	8.15481	8.40672	8.55876
Mief2	ENSMUSG00000018599	3.22395	3.08747	3.35842	3.1174	3.5337	2.99633	2.96027	2.70204	2.72664	3.40514	3.18091	3.31755	2.77899	2.90144	2.9597	3.6824	3.19336	3.12425	2.77248	2.69812	3.0383	3.89297	3.93672	3.7195	2.8353	2.73644	3.21427	3.92467	3.95521	3.91639	2.71304	3.13798	2.7974	3.91163	3.81014	3.92304	3.30413	3.47172	3.39703	2.49157	2.76567	2.6932	3.72504	3.76815	3.72357	2.7556	2.62708	2.65655
Tbx3	ENSMUSG00000018604	2.26235	2.43421	2.65629	5.40417	5.37149	5.47019	4.56646	4.79975	4.6932	5.3005	5.45559	5.38648	3.10715	3.27423	3.50982	6.09827	6.27114	6.22952	3.81763	3.90885	4.22189	5.56449	5.54251	5.39537	4.20576	4.49694	4.31253	5.47119	5.29104	5.59156	3.55524	3.50384	3.88925	6.4481	6.57266	6.42711	0.701079	1.13321	0.672751	4.50973	4.40621	4.3583	5.80605	5.79732	5.79985	4.37809	4.15318	4.50364
Crhr1	ENSMUSG00000018634	0.508588	0.401385	0.478977	0	0	0.0167224	0.255521	0.414042	0.365666	0.0342059	0	0.014935	0.344413	0.324271	0.530112	0	0	0.016161	0.809609	0.67632	0.666986	0	0.0470851	0	1.15157	0.888324	0.897417	0.102663	0.0770054	0.0583761	1.38085	1.21934	1.21413	0	0.0300542	0.0317208	0.929137	0.93086	0.789373	1.26467	1.16082	1.0934	0.0682268	0.171601	0.118244	1.70527	0.829042	1.06058
Dusp14	ENSMUSG00000018648	4.03459	3.9071	3.85203	2.3206	2.38132	2.18897	3.57392	3.09968	3.01066	2.8059	2.78112	2.66276	3.08087	3.00085	3.23627	2.4714	2.28513	2.663	3.17094	3.11901	3.22676	2.6063	2.86224	2.6809	3.75068	3.66861	3.39849	3.19505	3.06256	3.18795	3.77026	3.55645	3.42385	3.1415	2.79746	2.84693	4.6105	4.55939	4.5273	3.70694	3.96676	3.7409	2.84646	2.93632	2.90863	4.04055	4.38305	4.22726
Ikzf1	ENSMUSG00000018654	0.538541	0.492368	0.490192	1.81874	1.63615	2.41499	0.566617	0.550529	0.407644	1.78501	1.29954	2.15297	0.549466	0.618606	0.671744	1.62451	2.24887	2.1519	0.731076	0.664981	0.651289	1.83088	1.36772	1.4458	0.3928	0.476281	0.326246	1.64503	1.83129	1.45222	0.288594	0.618466	0.520744	1.50566	1.43857	1.40814	0.797994	1.09607	0.593598	0.290538	0.238728	0.273994	0.958801	0.75663	0.751208	0.200508	0.245356	0.168383
Pnpo	ENSMUSG00000018659	4.78473	4.72188	4.71238	5.08323	5.13581	5.24249	4.52543	4.47406	4.27474	4.85694	4.76232	4.87655	4.24054	4.35065	4.29301	4.96521	4.742	4.89602	4.50068	4.44282	4.51229	4.56213	4.67992	4.57115	4.68365	4.63397	4.50668	4.75133	4.86996	4.71225	4.59969	4.51861	4.52721	4.58443	4.4816	4.56401	4.8462	4.82121	4.79894	4.58518	4.59051	4.55439	3.81413	3.8827	3.90471	4.73422	4.77797	4.64275
Cbx1	ENSMUSG00000018666	8.20123	8.2015	8.17393	8.40711	8.36816	8.45896	7.98713	8.00091	8.08266	8.30283	8.43725	8.39786	7.97374	8.08186	7.95361	8.65783	8.42436	8.49965	7.69156	7.67238	7.69052	8.2827	8.19759	8.06218	7.7411	7.77663	7.74968	8.11372	8.02399	8.16223	7.78334	7.82349	7.87856	8.29487	8.31605	8.26392	8.04205	8.01541	7.9243	7.34047	7.41886	7.37694	7.86401	7.83686	7.86667	7.51518	7.52241	7.57778
Copz2	ENSMUSG00000018672	4.084	3.81835	4.00737	4.11499	4.42218	3.56568	5.34774	5.38672	5.05192	4.51954	4.32553	4.45172	5.37082	5.2552	5.41205	4.51629	4.32561	4.49465	3.94402	4.08857	4.34929	4.61685	4.70846	4.4522	4.26706	4.27736	4.35152	4.9664	4.77267	4.83631	4.14919	4.32641	4.43665	4.82642	4.34418	4.39453	3.93288	3.92339	3.85839	3.99214	4.08417	4.10181	5.63539	5.54482	6.0327	3.98777	4.10321	3.89113
Cpsf4l	ENSMUSG00000018727	0.473721	0.107315	0.349214	0	0	0.323091	1.14553	1.12503	0.986364	0.26267	0.270196	0.105964	0.487599	0.753828	0.518229	0	0.0309232	0.0350193	0.32179	0.384704	0.149578	0.107094	0.140383	0.0379769	0.693702	0.752773	0.909067	0.0942458	0.171795	0.179168	0.712514	0.524397	0.633171	0.134656	0.0706623	0.131043	0.231104	0.132061	0.258747	0.79701	0.936097	0.686393	0.0871289	0.0324377	0.109788	0.978767	0.896655	0.908197
Slc25a35	ENSMUSG00000018740	1.99196	2.22058	2.06063	1.20057	1.20527	1.53218	2.028	2.35113	2.16396	1.10776	1.2016	1.18205	1.83966	1.81358	2.1628	1.4461	1.12022	1.07229	1.61378	1.64735	1.62986	1.91594	1.73716	1.48586	1.4863	1.53078	1.28815	1.38617	1.40355	1.28593	1.73485	1.56202	1.64034	1.8034	1.71039	1.83898	3.78034	3.67688	3.44997	2.24321	2.31582	2.27506	2.32046	2.28378	2.52454	1.94843	1.90188	1.98372
Zbtb4	ENSMUSG00000018750	1.8234	1.79496	1.7249	1.1186	0.639567	0.993901	1.88401	1.56802	1.50295	1.24775	0.834669	0.960606	1.91022	1.83435	1.90031	0.917902	0.87622	0.892306	2.25517	2.27984	2.40465	2.10905	1.86934	1.65018	2.16257	2.27008	2.04628	1.78737	1.5091	1.46606	2.4061	2.04422	2.11998	2.01979	1.81164	1.63227	2.17221	1.95888	1.94537	3.09672	2.95856	2.81317	2.75162	2.63508	2.4753	2.82783	3.09142	2.93732
Tnfsf12Tnfsf13	ENSMUSG00000018752	0.686992	0.72908	0.493522	1.33706	1.51024	1.46335	0.720296	0.65235	0.85381	0.750475	0.886219	0.658825	0.342036	0.821738	0.518876	0.546398	0.448852	0.680248	0.494771	0.187233	0.622291	1.34115	1.26547	1.07659	0.291538	0.4622	0.397273	0.951963	0.976257	0.917633	0.308663	0.308191	0.315635	0.834015	0.86299	1.02488	0.630294	0.479558	0.363183	0.322833	0.293201	0.348139	1.52331	1.76904	1.50002	0.219662	0.102315	0.135567
Cd68	ENSMUSG00000018774	2.51408	1.79384	2.18558	3.0561	2.88127	2.77288	2.26867	2.17031	1.99877	2.77332	2.68081	2.31844	2.011	1.84977	2.45039	2.8738	2.87911	3.23411	2.16829	2.55855	2.41066	2.44517	2.52605	2.48364	1.96198	2.07602	2.15029	2.24525	2.36488	2.27989	1.79059	2.11576	2.22536	2.56687	2.51817	2.18937	2.07335	1.55177	1.99828	2.69125	2.5324	2.59788	2.63888	2.40919	2.70454	2.27622	2.12974	2.51026
[truncated: 10,477 more rows]
[truncated: 22 more columns]
