# Supplementary material for: An Alternative Splicing Program for Mouse Craniofacial Development
Source: Front Physiol. 2020 Sep 4;11:1099. doi: 10.3389/fphys.2020.01099 (PMC7498679; doi:10.3389/fphys.2020.01099)
Supplement: Supplementary file 3 [file Table_3.xlsx]

## Sheet: DE gene programs 
Gene	Common_name	Differentially expressed gene progroams
ENSMUSG00000078894	2210418O10Rik	Late
ENSMUSG00000041654	Slc39a11	Late
ENSMUSG00000021090	Lrrc9	Late
ENSMUSG00000081160	Gm14897	Late
ENSMUSG00000094886	Gm10784	Late
ENSMUSG00000090516	Rps11-ps1	Late
ENSMUSG00000094344	Gm11942	Late
ENSMUSG00000062083	Rpl13a-ps1	Late
ENSMUSG00000101875	Gm6028	Late
ENSMUSG00000090077	Lime1	Late
ENSMUSG00000083394	Gm11703	Late
ENSMUSG00000090236	Car15	Late
ENSMUSG00000084071	Gm13378	Late
ENSMUSG00000097586	Gm26528	Late
ENSMUSG00000006705	Pknox1	Late
ENSMUSG00000087370	Tmem170b	Late
ENSMUSG00000002897	Il17ra	Late
ENSMUSG00000063838	Cdc42ep5	Late
ENSMUSG00000032452	Clstn2	Late
ENSMUSG00000046719	Nxph3	Late
ENSMUSG00000044337	Ackr3	Late
ENSMUSG00000028015	Ctso	Late
ENSMUSG00000056144	Trim34a	Late
ENSMUSG00000033147	Slc22a15	Late
ENSMUSG00000040855	Reps2	Late
ENSMUSG00000024901	Peli3	Late
ENSMUSG00000047632	Fgfbp3	Late
ENSMUSG00000036333	Kidins220	Late
ENSMUSG00000031441	Atp11a	Late
ENSMUSG00000081534	Slc48a1	Late
ENSMUSG00000093803	Ppp2r3d	Late
ENSMUSG00000093803	Ppp2r3d	Late
ENSMUSG00000008855	Hdac5	Late
ENSMUSG00000082596	Gm14227	Late
ENSMUSG00000028051	Hcn3	Late
ENSMUSG00000031166	Wdr13	Late
ENSMUSG00000081263	Gm14859	Late
ENSMUSG00000093483	AA465934	Late
ENSMUSG00000090138	Gm3687	Late
ENSMUSG00000103396	RP24-360M7.1	Late
ENSMUSG00000047657	Crry-ps	Late
ENSMUSG00000092086	Gm6793	Late
ENSMUSG00000020894	Vamp2	Late
ENSMUSG00000082301	Gm14032	Late
ENSMUSG00000082002	Gm6568	Late
ENSMUSG00000097867	1110054M08Rik	Late
ENSMUSG00000015214	Mtmr1	Late
ENSMUSG00000095288	Gm7618	Late
ENSMUSG00000027215	Cd82	Late
ENSMUSG00000059866	Tnip2	Late
ENSMUSG00000021127	Zfp36l1	Late
ENSMUSG00000028673	Fuca1	Late
ENSMUSG00000051550	Zfp579	Late
ENSMUSG00000014158	Trpv4	Late
ENSMUSG00000034949	Zfr2	Late
ENSMUSG00000070604	Vsig10l	Late
ENSMUSG00000095803	Gm20796	Late
ENSMUSG00000021285	Ppp1r13b	Late
ENSMUSG00000039713	Plekhg5	Late
ENSMUSG00000005986	Ankrd13d	Late
ENSMUSG00000046947	Adck2	Late
ENSMUSG00000082519	Vamp7-ps	Late
ENSMUSG00000100747	1700084E18Rik	Late
ENSMUSG00000084845	Tmem240	Late
ENSMUSG00000023795	Pisd-ps2	Late
ENSMUSG00000045193	Cirbp	Late
ENSMUSG00000024952	Rps6ka4	Late
ENSMUSG00000048756	Foxo3	Late
ENSMUSG00000020621	Rdh14	Late
ENSMUSG00000086119	Gm2415	Late
ENSMUSG00000044022	Pcdhb21	Late
ENSMUSG00000054939	Zfp174	Late
ENSMUSG00000046387	Pcdhb17	Late
ENSMUSG00000043313	Pcdhb19	Late
ENSMUSG00000046191	Pcdhb20	Late
ENSMUSG00000047910	Pcdhb16	Late
ENSMUSG00000018474	Chd3	Late
ENSMUSG00000031666	Rbl2	Late
ENSMUSG00000082286	Pisd-ps1	Late
ENSMUSG00000019873	Reep3	Late
ENSMUSG00000036995	Asap3	Late
ENSMUSG00000082844	Gm13537	Late
ENSMUSG00000092241	Gm20522	Late
ENSMUSG00000061414	Cracr2a	Late
ENSMUSG00000037447	Arid5a	Late
ENSMUSG00000037606	Osbpl5	Late
ENSMUSG00000079137	Rpl27-ps1	Late
ENSMUSG00000039747	Orai2	Late
ENSMUSG00000052291	5330438D12Rik	Late
ENSMUSG00000002396	Ocel1	Late
ENSMUSG00000020639	Pfn4	Late
ENSMUSG00000041695	Kcnj2	Late
ENSMUSG00000051495	Irf2bp2	Late
ENSMUSG00000052656	Rnf103	Late
ENSMUSG00000082637	Gm11248	Late
ENSMUSG00000032579	Hemk1	Late
ENSMUSG00000099094	Gm19569	Late
ENSMUSG00000074228	Gm10645	Late
ENSMUSG00000051185	Fam174a	Late
ENSMUSG00000056753	C330011M18Rik	Late
ENSMUSG00000063142	Kcnma1	Late
ENSMUSG00000024687	Osbp	Late
ENSMUSG00000048546	Tob2	Late
ENSMUSG00000009905	Kdsr	Late
ENSMUSG00000059713	Rcan3	Late
ENSMUSG00000066233	Tmem42	Late
ENSMUSG00000034430	Zxdc	Late
ENSMUSG00000038365	Fbxo25	Late
ENSMUSG00000043257	Pigv	Late
ENSMUSG00000028420	Tmem38b	Late
ENSMUSG00000022203	Efs	Late
ENSMUSG00000025262	Fam120c	Late
ENSMUSG00000018820	Zfyve27	Late
ENSMUSG00000035441	Myo1d	Late
ENSMUSG00000038260	Trpm4	Late
ENSMUSG00000094103	1700047I17Rik2	Late
ENSMUSG00000031150	Ccdc120	Late
ENSMUSG00000097216	4932441J04Rik	Late
ENSMUSG00000053821	Gm9922	Late
ENSMUSG00000024357	Sil1	Late
ENSMUSG00000038844	Kif16b	Late
ENSMUSG00000096578	Gm9529	Late
ENSMUSG00000039891	Txlnb	Late
ENSMUSG00000043323	Fbrsl1	Late
ENSMUSG00000022223	Sdr39u1	Late
ENSMUSG00000045842	Gm7148	Late
ENSMUSG00000020737	Hn1	Late
ENSMUSG00000022940	Pigp	Late
ENSMUSG00000080824	Gm9001	Late
ENSMUSG00000023020	Cox14	Late
ENSMUSG00000023707	Ogfod2	Late
ENSMUSG00000001018	Snapin	Late
ENSMUSG00000053334	Ficd	Late
ENSMUSG00000000708	Kat2b	Late
ENSMUSG00000027276	Jag1	Late
ENSMUSG00000026203	Dnajb2	Late
ENSMUSG00000045348	Nyap1	Late
ENSMUSG00000026571	Dcaf6	Late
ENSMUSG00000039914	Coq10a	Late
ENSMUSG00000040794	C1qtnf4	Late
ENSMUSG00000003872	Lin7b	Late
ENSMUSG00000096210	H1f0	Late
ENSMUSG00000035184	Fam124a	Late
ENSMUSG00000031129	Slc9a9	Late
ENSMUSG00000094626	Cecr6	Late
ENSMUSG00000034757	Tmub2	Late
ENSMUSG00000060380	C030014I23Rik	Late
ENSMUSG00000036622	Atp13a2	Late
ENSMUSG00000054723	Vmac	Late
ENSMUSG00000042293	Gm5617	Late
ENSMUSG00000027589	Pcmtd2	Late
ENSMUSG00000032842	Abcc10	Late
ENSMUSG00000032812	Arap1	Late
ENSMUSG00000074215	Gm10643	Late
ENSMUSG00000053819	Camk2d	Late
ENSMUSG00000097101	1810034E14Rik	Late
ENSMUSG00000089917	Uckl1	Late
ENSMUSG00000037363	Letm2	Late
ENSMUSG00000070737	Gm12942	Late
ENSMUSG00000078485	Plekhn1	Late
ENSMUSG00000039683	Sdk1	Late
ENSMUSG00000086465	Gm16049	Late
ENSMUSG00000097326	A330048O09Rik	Late
ENSMUSG00000002012	Pnck	Late
ENSMUSG00000036661	Dennd3	Late
ENSMUSG00000036395	Glb1l2	Late
ENSMUSG00000026269	Rnpepl1	Late
ENSMUSG00000020083	2010107G23Rik	Late
ENSMUSG00000071711	Mpst	Late
ENSMUSG00000024268	Celf4	Late
ENSMUSG00000095595	Fam177a	Late
ENSMUSG00000003863	Ppfia3	Late
ENSMUSG00000006463	Zdhhc24	Late
ENSMUSG00000078851	Hist3h2a	Late
ENSMUSG00000029627	Zkscan14	Late
ENSMUSG00000029438	Bcl7a	Late
ENSMUSG00000030533	Unc45a	Late
ENSMUSG00000029352	Crybb3	Late
ENSMUSG00000103715	RP23-58N8.6	Late
ENSMUSG00000036242	3632451O06Rik	Late
ENSMUSG00000041477	Dcp1b	Late
ENSMUSG00000021661	Ankra2	Late
ENSMUSG00000027130	Slc12a6	Late
ENSMUSG00000082197	Gm8577	Late
ENSMUSG00000081314	Gm14132	Late
ENSMUSG00000096920	Rps19-ps8	Late
ENSMUSG00000083672	Kpna2-ps	Late
ENSMUSG00000093525	Gm8974	Late
ENSMUSG00000082706	Gm11663	Late
ENSMUSG00000083512	Gm12749	Late
ENSMUSG00000081994	Gm14517	Late
ENSMUSG00000021765	Fst	Late
ENSMUSG00000058869	Gm4832	Late
ENSMUSG00000089883	Gm3355	Late
ENSMUSG00000091269	Gm6682	Late
ENSMUSG00000094627	Gm10182	Late
ENSMUSG00000082665	Gm11470	Late
ENSMUSG00000102478	RP24-268A16.1	Late
ENSMUSG00000080746	Rpsa-ps12	Late
ENSMUSG00000071193	Gm4938	Late
ENSMUSG00000083356	Gm11708	Late
ENSMUSG00000081746	Gm13925	Late
ENSMUSG00000100362	Gm1833	Late
ENSMUSG00000082453	Gm11502	Late
ENSMUSG00000104349	RP23-235F22.1	Late
ENSMUSG00000084328	Gm14046	Late
ENSMUSG00000086721	Gm13750	Late
ENSMUSG00000089640	Gm6397	Late
ENSMUSG00000096156	Gm9242	Late
ENSMUSG00000082134	Gm15236	Late
ENSMUSG00000089645	Gm5766	Late
ENSMUSG00000089931	Gm8459	Late
ENSMUSG00000083885	Gm13213	Late
ENSMUSG00000068629	Gm6155	Late
ENSMUSG00000083280	Gm11838	Late
ENSMUSG00000082535	Gm7860	Late
ENSMUSG00000057626	Gm5621	Late
ENSMUSG00000059252	Tpt1-ps5	Late
ENSMUSG00000084111	Gm15710	Late
ENSMUSG00000059033	Rpl18a-ps1	Late
ENSMUSG00000081750	Gm4995	Late
ENSMUSG00000005983	1700037C18Rik	Late
ENSMUSG00000082655	Gm7857	Late
ENSMUSG00000082550	Gm12344	Late
ENSMUSG00000093677	Gm20712	Late
ENSMUSG00000028229	Rmdn1	Late
ENSMUSG00000035776	Cd99l2	Late
ENSMUSG00000040323	Gm15429	Late
ENSMUSG00000046822	Slc39a3	Late
ENSMUSG00000093803	Ppp2r3d	Late
ENSMUSG00000078201	Tmem203	Late
ENSMUSG00000101449	Gm17791	Late
ENSMUSG00000039715	Wdr34	Late
ENSMUSG00000096712	Gm15454	Late
ENSMUSG00000030545	Pex11a	Late
ENSMUSG00000098318	1190002F15Rik	Late
ENSMUSG00000065934	Gm25630	Late
ENSMUSG00000021123	Rdh12	Late
ENSMUSG00000062859	Tcp11	Late
ENSMUSG00000038570	Fam154b	Late
ENSMUSG00000081378	Rps13-ps4	Late
ENSMUSG00000084808	9430091E24Rik	Late
ENSMUSG00000047617	BC029214	Late
ENSMUSG00000097277	2900076A07Rik	Late
ENSMUSG00000073437	D330041H03Rik	Late
ENSMUSG00000019779	Frk	Late
ENSMUSG00000068874	Selenbp1	Late
ENSMUSG00000026781	Acbd5	Late
ENSMUSG00000026792	Lrsam1	Late
ENSMUSG00000043644	0610009L18Rik	Late
ENSMUSG00000049755	Zfp672	Late
ENSMUSG00000074862	BC025920	Late
ENSMUSG00000008153	Clstn3	Late
ENSMUSG00000028756	Pink1	Late
ENSMUSG00000019872	Smpdl3a	Late
ENSMUSG00000042675	Ypel3	Late
ENSMUSG00000103876	RP24-229P11.1	Late
ENSMUSG00000036606	Plxnb2	Late
ENSMUSG00000039461	Tcta	Late
ENSMUSG00000043290	Zfp784	Late
ENSMUSG00000097343	9030407P20Rik	Late
ENSMUSG00000083240	Gm13453	Late
ENSMUSG00000100876	2810454H06Rik	Late
ENSMUSG00000097573	G730003C15Rik	Late
ENSMUSG00000103041	RP24-372I24.4	Late
ENSMUSG00000029167	Ppargc1a	Late
ENSMUSG00000033676	Gabrb3	Late
ENSMUSG00000037362	Nov	Late
ENSMUSG00000055494	Gm14168	Late
ENSMUSG00000061576	Dpp6	Late
ENSMUSG00000031021	Tmem9b	Late
ENSMUSG00000041115	Iqsec2	Late
ENSMUSG00000003363	Pld3	Late
ENSMUSG00000006906	Stambp	Late
ENSMUSG00000096995	2810029C07Rik	Late
ENSMUSG00000024308	Tapbp	Late
ENSMUSG00000036002	Fam214b	Late
ENSMUSG00000091462	Gm17084	Late
ENSMUSG00000096727	Psmb9	Late
ENSMUSG00000004843	Chmp2b	Late
ENSMUSG00000050931	Sgms2	Late
ENSMUSG00000095562	Gm21887	Late
ENSMUSG00000096768	Erdr1	Late
ENSMUSG00000025375	Aatk	Late
ENSMUSG00000021476	Habp4	Late
ENSMUSG00000039286	Fndc3b	Late
ENSMUSG00000021286	Zfyve21	Late
ENSMUSG00000046027	Stard5	Late
ENSMUSG00000002602	Axl	Late
ENSMUSG00000033361	Prrg3	Late
ENSMUSG00000016179	Camk1g	Late
ENSMUSG00000023972	Ptk7	Late
ENSMUSG00000032503	Arpp21	Late
ENSMUSG00000035713	Usp35	Late
ENSMUSG00000030757	Zkscan2	Late
ENSMUSG00000033253	Szt2	Late
ENSMUSG00000020108	Ddit4	Late
ENSMUSG00000021238	Aldh6a1	Late
ENSMUSG00000097164	Cep83os	Late
ENSMUSG00000100254	TRPC2	Late
ENSMUSG00000032763	Ilvbl	Late
ENSMUSG00000035236	Scai	Late
ENSMUSG00000018451	6330403K07Rik	Late
ENSMUSG00000087385	AA415398	Late
ENSMUSG00000005087	Cd44	Late
ENSMUSG00000023951	Vegfa	Late
ENSMUSG00000052911	Lamb2	Late
ENSMUSG00000100337	Gm5066	Late
ENSMUSG00000034973	Dopey1	Late
ENSMUSG00000059326	Csf2ra	Late
ENSMUSG00000038738	Shank1	Late
ENSMUSG00000031570	Ppapdc1b	Late
ENSMUSG00000100966	Gm5700	Late
ENSMUSG00000028980	H6pd	Late
ENSMUSG00000029478	Ncor2	Late
ENSMUSG00000039168	Dap	Late
ENSMUSG00000043398	Gpr135	Late
ENSMUSG00000033540	Idua	Late
ENSMUSG00000047344	Lancl3	Late
ENSMUSG00000002346	Slc25a42	Late
ENSMUSG00000024948	Map4k2	Late
ENSMUSG00000098488	Pla2g4b	Late
ENSMUSG00000059412	Fxyd2	Late
ENSMUSG00000067653	Ankrd23	Late
ENSMUSG00000020000	Moxd1	Late
ENSMUSG00000021219	Rgs6	Late
ENSMUSG00000030772	Dkk3	Late
ENSMUSG00000024985	Tcf7l2	Late
ENSMUSG00000057219	Armc7	Late
ENSMUSG00000022895	Ets2	Late
ENSMUSG00000025491	Ifitm1	Late
ENSMUSG00000068631	Gm7676	Late
ENSMUSG00000023571	Fam132a	Late
ENSMUSG00000020635	Fkbp1b	Late
ENSMUSG00000033852	Gm28042	Late
ENSMUSG00000038836	Agbl3	Late
ENSMUSG00000097574	C920006O11Rik	Late
ENSMUSG00000006920	Ezh1	Late
ENSMUSG00000096780	Tmem181b-ps	Late
ENSMUSG00000022102	Dok2	Late
ENSMUSG00000073481	2020-03-02	Late
ENSMUSG00000085936	2610307P16Rik	Late
ENSMUSG00000000126	Wnt9a	Late
ENSMUSG00000026443	Lrrn2	Late
ENSMUSG00000048776	Pthlh	Late
ENSMUSG00000057315	Arhgap24	Late
ENSMUSG00000032578	Cish	Late
ENSMUSG00000063382	Bcl9l	Late
ENSMUSG00000103585	Pcdhgb4	Late
ENSMUSG00000069255	Dusp22	Late
ENSMUSG00000090235	Gm16244	Late
ENSMUSG00000017740	Slc12a5	Late
ENSMUSG00000081122	Gm13678	Late
ENSMUSG00000051652	Lrrc3	Late
ENSMUSG00000085457	1110046J04Rik	Late
ENSMUSG00000022040	Ephx2	Late
ENSMUSG00000032231	Anxa2	Late
ENSMUSG00000034007	Scaper	Late
ENSMUSG00000036894	Rap2b	Late
ENSMUSG00000089945	Palm2Akap2	Late
ENSMUSG00000090053	Palm2	Late
ENSMUSG00000025083	Afap1l2	Late
ENSMUSG00000032085	Tagln	Late
ENSMUSG00000039384	Dusp10	Late
ENSMUSG00000046794	Ppp1r3b	Late
ENSMUSG00000079056	Kcnip3	Late
ENSMUSG00000005124	Wisp1	Late
ENSMUSG00000046618	Olfml2a	Late
ENSMUSG00000038305	Spats2l	Late
ENSMUSG00000033033	Calhm2	Late
ENSMUSG00000033467	Crlf2	Late
ENSMUSG00000038037	Socs1	Late
ENSMUSG00000079889	Gm11951	Late
ENSMUSG00000024759	Atl3	Late
ENSMUSG00000047037	Nipa1	Late
ENSMUSG00000046186	Cd109	Late
ENSMUSG00000046808	Atp10d	Late
ENSMUSG00000070056	Mfhas1	Late
ENSMUSG00000029088	Kcnip4	Late
ENSMUSG00000037104	Socs5	Late
ENSMUSG00000000078	Klf6	Late
ENSMUSG00000045613	Chrm2	Late
ENSMUSG00000015243	Abca1	Late
ENSMUSG00000067336	Bmpr2	Late
ENSMUSG00000031209	Heph	Late
ENSMUSG00000030207	8430419L09Rik	Late
ENSMUSG00000032353	Tmed3	Late
ENSMUSG00000020100	Slc29a3	Late
ENSMUSG00000066621	Tecpr1	Late
ENSMUSG00000038648	Creb3l2	Late
ENSMUSG00000069833	Ahnak	Late
ENSMUSG00000030670	Cyp2r1	Late
ENSMUSG00000022305	Lrp12	Late
ENSMUSG00000042834	Nrep	Late
ENSMUSG00000003032	Klf4	Late
ENSMUSG00000039908	Slc26a11	Late
ENSMUSG00000031169	Porcn	Late
ENSMUSG00000037493	Cib2	Late
ENSMUSG00000038059	Smim3	Late
ENSMUSG00000091697	Eif3s6-ps2	Late
ENSMUSG00000082420	Gm6517	Late
ENSMUSG00000086420	Gm8865	Late
ENSMUSG00000024121	Atp6v0c	Late
ENSMUSG00000083154	Gm11892	Late
ENSMUSG00000102489	RP23-35F4.1	Late
ENSMUSG00000103801	RP24-271A4.1	Late
ENSMUSG00000084339	Gm6141	Late
ENSMUSG00000081487	Gm13689	Late
ENSMUSG00000103725	RP24-422L17.2	Late
ENSMUSG00000024921	Smarca2	Late
ENSMUSG00000029470	P2rx4	Late
ENSMUSG00000054099	Slc25a40	Late
ENSMUSG00000041921	Metap1d	Late
ENSMUSG00000102059	Gm20257	Late
ENSMUSG00000104399	RP23-448A11.16	Late
ENSMUSG00000036298	Slc2a13	Late
ENSMUSG00000052516	Robo2	Late
ENSMUSG00000039316	Rftn1	Late
ENSMUSG00000023034	Nr4a1	Late
ENSMUSG00000028341	Nr4a3	Late
ENSMUSG00000032508	Myd88	Late
ENSMUSG00000020848	Doc2b	Late
ENSMUSG00000040813	Tex264	Late
ENSMUSG00000025170	Rab40b	Late
ENSMUSG00000103568	RP24-283F19.2	Late
ENSMUSG00000027712	Anxa5	Late
ENSMUSG00000032611	1700102P08Rik	Late
ENSMUSG00000022122	Ednrb	Late
ENSMUSG00000026308	Klhl30	Late
ENSMUSG00000036192	Rorb	Late
ENSMUSG00000028834	Trim63	Late
ENSMUSG00000040605	Bace2	Late
ENSMUSG00000065899	Gm24523	Late
ENSMUSG00000084169	Gm12240	Late
ENSMUSG00000000861	Bcl11a	Late
ENSMUSG00000085167	Gm12063	Late
ENSMUSG00000080716	Gm13503	Late
ENSMUSG00000091876	Gm3851	Late
ENSMUSG00000027358	Bmp2	Late
ENSMUSG00000000876	Pxmp4	Late
ENSMUSG00000022012	Enox1	Late
ENSMUSG00000025648	Pfkfb4	Late
ENSMUSG00000032121	Tmem218	Late
ENSMUSG00000000823	Znf512b	Late
ENSMUSG00000033152	Podxl2	Late
ENSMUSG00000022208	Jph4	Late
ENSMUSG00000060969	Irx1	Late
ENSMUSG00000028601	Echdc2	Late
ENSMUSG00000034164	Emid1	Late
ENSMUSG00000103048	RP24-286H7.2	Late
ENSMUSG00000002983	Relb	Late
ENSMUSG00000025225	Nfkb2	Late
ENSMUSG00000026458	Ppfia4	Late
ENSMUSG00000039199	Zdhhc1	Late
ENSMUSG00000059277	R74862	Late
ENSMUSG00000033420	Antxr1	Late
ENSMUSG00000029455	Aldh2	Late
ENSMUSG00000036478	Btg1	Late
ENSMUSG00000027805	Pfn2	Late
ENSMUSG00000026433	Rab29	Late
ENSMUSG00000029050	Ski	Late
ENSMUSG00000010362	Rdm1	Late
ENSMUSG00000060126	Tpt1	Late
ENSMUSG00000027610	Gss	Late
ENSMUSG00000048251	Bcl11b	Late
ENSMUSG00000037772	Mrpl23	Late
ENSMUSG00000047115	Fam221a	Late
ENSMUSG00000024942	Capn1	Late
ENSMUSG00000031398	Plxna3	Late
ENSMUSG00000020325	Fstl3	Late
ENSMUSG00000082791	Gm4875	Late
ENSMUSG00000026888	Grb14	Late
ENSMUSG00000040812	Agbl2	Late
ENSMUSG00000051154	Commd3	Late
ENSMUSG00000090206	Tepp	Late
ENSMUSG00000032482	Cspg5	Late
ENSMUSG00000046204	Pnma2	Late
ENSMUSG00000068113	Gm4907	Late
ENSMUSG00000085107	Gm4764	Late
ENSMUSG00000080727	C920021L13Rik	Late
ENSMUSG00000075389	2810410L24Rik	Late
ENSMUSG00000081516	Gm12470	Late
ENSMUSG00000083631	Gm13366	Late
ENSMUSG00000018750	Zbtb4	Late
ENSMUSG00000029723	Tsc22d4	Late
ENSMUSG00000033111	3830406C13Rik	Late
ENSMUSG00000039989	Cbx4	Late
ENSMUSG00000026034	Clk1	Late
ENSMUSG00000053964	Lgals4	Late
ENSMUSG00000048581	E130311K13Rik	Late
ENSMUSG00000092368	A930015D03Rik	Late
ENSMUSG00000030341	Tnfrsf1a	Late
ENSMUSG00000047168	Gm6684	Late
ENSMUSG00000022505	Emp2	Late
ENSMUSG00000097635	Gm26826	Late
ENSMUSG00000019832	Rab32	Late
ENSMUSG00000059327	Eda	Late
ENSMUSG00000082931	Gm13586	Late
ENSMUSG00000038152	5033430I15Rik	Late
ENSMUSG00000048807	Slc35e4	Late
ENSMUSG00000073405	C920025E04Rik	Late
ENSMUSG00000006301	Tmbim1	Late
ENSMUSG00000059401	Mamld1	Late
ENSMUSG00000038524	Fchsd1	Late
ENSMUSG00000042349	Ikbke	Late
ENSMUSG00000080058	Gm11175	Late
ENSMUSG00000097131	D230017M19Rik	Late
ENSMUSG00000082838	Gm14519	Late
ENSMUSG00000023044	Csad	Late
ENSMUSG00000097572	Gm26797	Late
ENSMUSG00000000594	Gm2a	Late
ENSMUSG00000020723	Cacng4	Late
ENSMUSG00000022853	Ehhadh	Late
ENSMUSG00000003992	Ssbp2	Late
ENSMUSG00000103711	Tstd1	Late
ENSMUSG00000039770	Ypel5	Late
ENSMUSG00000091811	Inafm1	Late
ENSMUSG00000032652	Crebl2	Late
ENSMUSG00000046404	Yod1	Late
ENSMUSG00000084925	1810062O18Rik	Late
ENSMUSG00000055067	Smyd3	Late
ENSMUSG00000021619	Atg10	Late
ENSMUSG00000103039	RP23-372I17.5	Late
ENSMUSG00000042289	Hsd3b7	Late
ENSMUSG00000037022	Mmaa	Late
ENSMUSG00000090110	Mtcp1	Late
ENSMUSG00000056116	H2-T22	Late
ENSMUSG00000079491	H2-T10	Late
ENSMUSG00000056418	BC043934	Late
ENSMUSG00000022514	Il1rap	Late
ENSMUSG00000029406	Pitpnm2	Late
ENSMUSG00000027763	Mbnl1	Late
ENSMUSG00000028631	Kcnq4	Late
ENSMUSG00000020627	Klhl29	Late
ENSMUSG00000031200	Mtcp1	Late
ENSMUSG00000091071	1700030C10Rik	Late
ENSMUSG00000079681	Zglp1	Late
ENSMUSG00000033981	Gria2	Late
ENSMUSG00000091243	Vgll3	Late
ENSMUSG00000096918	Gm16863	Late
ENSMUSG00000024008	Cpne5	Late
ENSMUSG00000003949	Hlf	Late
ENSMUSG00000085996	A830012C17Rik	Late
ENSMUSG00000030703	Gdpd3	Late
ENSMUSG00000027895	Kcnc4	Late
ENSMUSG00000059325	Hopx	Late
ENSMUSG00000084324	Gm6500	Late
ENSMUSG00000063816	Gm4987	Late
ENSMUSG00000086714	0610009E02Rik	Late
ENSMUSG00000040473	Cfap69	Late
ENSMUSG00000086670	Gm13194	Late
ENSMUSG00000080364	Gm25777	Late
ENSMUSG00000015451	C4a	Late
ENSMUSG00000026344	Lypd1	Late
ENSMUSG00000041119	Pde9a	Late
ENSMUSG00000100455	Gm29170	Late
ENSMUSG00000035458	Tnni3	Late
ENSMUSG00000098024	Gm27003	Late
ENSMUSG00000082120	Gm15720	Late
ENSMUSG00000081565	Rps12-ps5	Late
ENSMUSG00000084274	Gm12504	Late
ENSMUSG00000098019	Gm2546	Late
ENSMUSG00000101939	Gm28438	Late
ENSMUSG00000069236	Gm7251	Late
ENSMUSG00000063885	Gm6498	Late
ENSMUSG00000092257	Gm2308	Late
ENSMUSG00000078592	Gm4609	Late
ENSMUSG00000081721	Gm13882	Late
ENSMUSG00000081093	Gm12565	Late
ENSMUSG00000082938	Gm2810	Late
ENSMUSG00000082867	Gm15730	Late
ENSMUSG00000081067	Gm12912	Late
ENSMUSG00000089800	Rps19-ps10	Late
ENSMUSG00000074629	4930518I15Rik	Late
ENSMUSG00000097042	Gm17491	Late
ENSMUSG00000072324	Gm8420	Late
ENSMUSG00000082768	Gm12727	Late
ENSMUSG00000097509	B230322F03Rik	Late
ENSMUSG00000072576	Gm16020	Late
ENSMUSG00000081620	Gm14633	Late
ENSMUSG00000080866	Gm5687	Late
ENSMUSG00000062683	Atp5g2	Late
ENSMUSG00000083429	Gm15198	Late
ENSMUSG00000035711	Dok3	Late
ENSMUSG00000087151	Gm14022	Late
ENSMUSG00000090544	Gm6576	Late
ENSMUSG00000034353	Ramp1	Late
ENSMUSG00000082774	Gm8805	Late
ENSMUSG00000071866	Ppia	Late
ENSMUSG00000002228	Ppm1j	Late
ENSMUSG00000081249	Gm11517	Late
ENSMUSG00000080779	Gm8731	Late
ENSMUSG00000083780	Gm12728	Late
ENSMUSG00000100599	1700120C14Rik	Late
ENSMUSG00000091561	Gm6665	Late
ENSMUSG00000092274	Neat1	Late
ENSMUSG00000100071	Gm28707	Late
ENSMUSG00000041954	Tnfrsf18	Late
ENSMUSG00000021223	Papln	Late
ENSMUSG00000042306	S100a14	Late
ENSMUSG00000094873	Gm13812	Late
ENSMUSG00000095203	Gm13810	Late
ENSMUSG00000081896	Gm5389	Late
ENSMUSG00000097968	Tpi-rs2	Late
ENSMUSG00000030103	Bhlhe40	Late
ENSMUSG00000102809	RP23-78J18.1	Late
ENSMUSG00000066362	Rps13-ps1	Late
ENSMUSG00000010651	Acaa1b	Late
ENSMUSG00000058354	Krt6a	Late
ENSMUSG00000005107	Slc2a9	Late
ENSMUSG00000035861	Tmprss11b	Late
ENSMUSG00000081925	Rpl31-ps22	Late
ENSMUSG00000084291	Gm6654	Late
ENSMUSG00000044639	Gm11507	Late
ENSMUSG00000080763	Gm12341	Late
ENSMUSG00000083007	Gm13623	Late
ENSMUSG00000060209	Gm6570	Late
ENSMUSG00000045694	Gm4997	Late
ENSMUSG00000072255	Rpl31-ps17	Late
ENSMUSG00000081664	Gm15544	Late
ENSMUSG00000089958	Gm16165	Late
ENSMUSG00000099997	Tubb4b-ps2	Late
ENSMUSG00000082296	Gm11450	Late
ENSMUSG00000070778	Rpl7a-ps8	Late
ENSMUSG00000082171	Rpl27-ps2	Late
ENSMUSG00000082193	Rpl5-ps1	Late
ENSMUSG00000101496	Gm8885	Late
ENSMUSG00000069125	Rps24-ps2	Late
ENSMUSG00000082633	Gm15779	Late
ENSMUSG00000080844	Gm14107	Late
ENSMUSG00000081703	Gm6285	Late
ENSMUSG00000082165	Gm7091	Late
ENSMUSG00000096362	Rps12-ps21	Late
ENSMUSG00000099979	Gm5896	Late
ENSMUSG00000063328	Gm9396	Late
ENSMUSG00000083362	Gm8606	Late
ENSMUSG00000044377	Gm13080	Late
ENSMUSG00000083895	Gm12074	Late
ENSMUSG00000082442	Gm12686	Late
ENSMUSG00000083372	Gm11235	Late
ENSMUSG00000089673	Gm16546	Late
ENSMUSG00000090475	Gm6245	Late
ENSMUSG00000081104	Gm15989	Late
ENSMUSG00000081853	Gm13735	Late
ENSMUSG00000082389	Mkrn1-ps1	Late
ENSMUSG00000019039	Dalrd3	Late
ENSMUSG00000082743	Gm12988	Late
ENSMUSG00000086229	Gm4887	Late
ENSMUSG00000078965	Gm12033	Late
ENSMUSG00000083044	Gm12416	Late
ENSMUSG00000083270	Gm13498	Late
ENSMUSG00000081657	Gm15466	Late
ENSMUSG00000100033	Gm8337	Late
ENSMUSG00000098113	Gm2445	Late
ENSMUSG00000095159	Tubb4b-ps1	Late
ENSMUSG00000098091	Gm16470	Late
ENSMUSG00000090264	Eif4ebp3	Late
ENSMUSG00000091419	Gm17450	Late
ENSMUSG00000097885	5031434O11Rik	Late
ENSMUSG00000006638	Abhd1	Late
ENSMUSG00000031389	Arhgap4	Late
ENSMUSG00000098702	1500015A07Rik	Late
ENSMUSG00000087184	Gm11650	Late
ENSMUSG00000019066	Rab3d	Late
ENSMUSG00000092193	Cd9-ps	Late
ENSMUSG00000085028	Slc2a4rg-ps	Late
ENSMUSG00000095123	Gm21781	Late
ENSMUSG00000085054	Gm15834	Late
ENSMUSG00000087055	Gm11948	Late
ENSMUSG00000051431	Gpr87	Late
ENSMUSG00000043430	Psapl1	Late
ENSMUSG00000043681	Fam25c	Late
ENSMUSG00000074207	Adh1	Late
ENSMUSG00000027401	Tgm3	Late
ENSMUSG00000085576	Dpy19l2	Late
ENSMUSG00000081504	Gm12508	Late
ENSMUSG00000037157	Il22ra1	Late
ENSMUSG00000056501	Cebpb	Late
ENSMUSG00000072572	Slc39a2	Late
ENSMUSG00000020656	Grhl1	Late
ENSMUSG00000082361	Btc	Late
ENSMUSG00000064158	Izumo1	Late
ENSMUSG00000031778	Cx3cl1	Late
ENSMUSG00000054945	Gm9958	Late
ENSMUSG00000097290	1300002E11Rik	Late
ENSMUSG00000078619	Smarcd2	Late
ENSMUSG00000038453	Srcin1	Late
ENSMUSG00000087042	Gm11611	Late
ENSMUSG00000031297	Slc7a3	Late
ENSMUSG00000090031	4732440D04Rik	Late
ENSMUSG00000043833	2900005J15Rik	Late
ENSMUSG00000034035	Ccdc17	Late
ENSMUSG00000086417	Gm12996	Late
ENSMUSG00000062908	Acadm	Late
ENSMUSG00000025175	Fn3k	Late
ENSMUSG00000031627	Irf2	Late
ENSMUSG00000026676	Ccdc3	Late
ENSMUSG00000067219	Nipal1	Late
ENSMUSG00000084190	Gm11869	Late
ENSMUSG00000026072	Il1r1	Late
ENSMUSG00000097353	A430046D13Rik	Late
ENSMUSG00000042851	Zc3h6	Late
ENSMUSG00000087222	E030042O20Rik	Late
ENSMUSG00000036181	Hist1h1c	Late
ENSMUSG00000095789	Nupr1l	Late
ENSMUSG00000097536	2610037D02Rik	Late
ENSMUSG00000101599	Gm20342	Late
ENSMUSG00000091050	9330020H09Rik	Late
ENSMUSG00000081742	Gm9051	Late
ENSMUSG00000104126	RP24-252K15.3	Late
ENSMUSG00000035451	Foxa1	Late
ENSMUSG00000046782	Ttc6	Late
ENSMUSG00000024778	Fas	Late
ENSMUSG00000034634	Ly6d	Late
ENSMUSG00000035984	Nme5	Late
ENSMUSG00000091775	Gm16494	Late
ENSMUSG00000042564	Fam227a	Late
ENSMUSG00000073414	G6b	Late
ENSMUSG00000057286	St6galnac2	Late
ENSMUSG00000100831	Gm17847	Late
ENSMUSG00000022595	Lypd2	Late
ENSMUSG00000097740	E030044B06Rik	Late
ENSMUSG00000024517	Grp	Late
ENSMUSG00000026679	Enkur	Late
ENSMUSG00000066129	Kndc1	Late
ENSMUSG00000071550	Cfap44	Late
ENSMUSG00000087366	Junos	Late
ENSMUSG00000080730	Gm11313	Late
ENSMUSG00000087020	Gm16283	Late
ENSMUSG00000084380	Tmc4-ps	Late
ENSMUSG00000025739	Gng13	Late
ENSMUSG00000031844	Hsd17b2	Late
ENSMUSG00000087578	Ccdc142os	Late
ENSMUSG00000022543	4930451G09Rik	Late
ENSMUSG00000059040	Eno1b	Late
ENSMUSG00000089875	Etohd2	Late
ENSMUSG00000022679	Mpv17l	Late
ENSMUSG00000081041	Nlk-ps1	Late
ENSMUSG00000087327	Gm15884	Late
ENSMUSG00000098217	Gm27046	Late
ENSMUSG00000062962	Gm6378	Late
ENSMUSG00000069439	Gm8444	Late
ENSMUSG00000032556	Bfsp2	Late
ENSMUSG00000096001	2610528A11Rik	Late
ENSMUSG00000023968	Crip3	Late
ENSMUSG00000082705	Gm15616	Late
ENSMUSG00000085956	4930481B07Rik	Late
ENSMUSG00000017390	Aldoc	Late
ENSMUSG00000100213	Gm28151	Late
ENSMUSG00000085881	Gm15912	Late
ENSMUSG00000039616	Mocos	Late
ENSMUSG00000049112	Oxtr	Late
ENSMUSG00000101834	Gm5829	Late
ENSMUSG00000048138	Dmrt2	Late
ENSMUSG00000101089	2610016A17Rik	Late
ENSMUSG00000041523	Upk2	Late
ENSMUSG00000102166	RP23-74B7.1	Late
ENSMUSG00000026644	Acbd7	Late
ENSMUSG00000029503	P2rx2	Late
ENSMUSG00000072688	Gm10399	Late
ENSMUSG00000018648	Dusp14	Late
ENSMUSG00000028544	Slc5a9	Late
ENSMUSG00000021678	F2rl1	Late
ENSMUSG00000024972	Lgals12	Late
ENSMUSG00000022508	Bcl6	Late
ENSMUSG00000099098	1110035H17Rik	Late
ENSMUSG00000097585	Gm26529	Late
ENSMUSG00000024186	Rgs11	Late
ENSMUSG00000080712	Hist3h2bb-ps	Late
ENSMUSG00000079242	C730034F03Rik	Late
ENSMUSG00000097123	Gm6297	Late
ENSMUSG00000020173	Cobl	Late
ENSMUSG00000008461	Fut1	Late
ENSMUSG00000097814	Panct2	Late
ENSMUSG00000085891	Gm14634	Late
ENSMUSG00000086292	Gm16052	Late
ENSMUSG00000084331	Gm8163	Late
ENSMUSG00000097193	Gm26664	Late
ENSMUSG00000024437	Gm8615	Late
ENSMUSG00000031865	Dctn1	Late
ENSMUSG00000097835	Gm26910	Late
ENSMUSG00000097868	A330069E16Rik	Late
ENSMUSG00000087331	1810021B22Rik	Late
ENSMUSG00000096476	Gm12453	Late
ENSMUSG00000083016	Gm12618	Late
ENSMUSG00000011267	Zfp296	Late
ENSMUSG00000027713	1810062G17Rik	Late
ENSMUSG00000086754	Gm16098	Late
ENSMUSG00000079962	Gm12643	Late
ENSMUSG00000093579	Gm20036	Late
ENSMUSG00000073725	Lmbrd1	Late
ENSMUSG00000037697	Ddhd1	Late
ENSMUSG00000041608	Entpd3	Late
ENSMUSG00000082125	Gm14679	Late
ENSMUSG00000083186	Gm11805	Late
ENSMUSG00000074997	Pin1rt1	Late
ENSMUSG00000083649	Rasl2-9	Late
ENSMUSG00000071040	Gm9386	Late
ENSMUSG00000083796	Gm13369	Late
ENSMUSG00000083392	Gm6335	Late
ENSMUSG00000084021	Gm5832	Late
ENSMUSG00000082534	Gm13712	Late
ENSMUSG00000100590	Gm4785	Late
ENSMUSG00000081002	Gm14240	Late
ENSMUSG00000099732	Gm17752	Late
ENSMUSG00000098006	Gm8565	Late
ENSMUSG00000079311	Gm3222	Late
ENSMUSG00000082424	Gm13292	Late
ENSMUSG00000083159	Gm12180	Late
ENSMUSG00000098238	Gm8756	Late
ENSMUSG00000074804	AU015228	Late
ENSMUSG00000083964	Gm14122	Late
ENSMUSG00000084154	Gm15644	Late
ENSMUSG00000103257	RP23-167C2.1	Late
ENSMUSG00000100944	Gm28900	Late
ENSMUSG00000058443	Rpl10-ps3	Late
ENSMUSG00000082851	Gm11931	Late
ENSMUSG00000083772	Gm15566	Late
ENSMUSG00000102915	WI1-2736D10.3	Late
ENSMUSG00000083482	Gm14706	Late
ENSMUSG00000086889	Phf2os1	Late
ENSMUSG00000079988	Gm11970	Late
ENSMUSG00000089806	Gm16570	Late
ENSMUSG00000102731	RP24-550N13.2	Late
ENSMUSG00000082755	Gm8692	Late
ENSMUSG00000075587	Gm11531	Late
ENSMUSG00000082792	Gm12176	Late
ENSMUSG00000081575	Gm12090	Late
ENSMUSG00000096086	Gm4761	Late
ENSMUSG00000082320	Gm11877	Late
ENSMUSG00000099253	Gm7863	Late
ENSMUSG00000081855	Rpl17-ps5	Late
ENSMUSG00000057262	Gm10020	Late
ENSMUSG00000082971	Gm13517	Late
ENSMUSG00000097106	Rpl31-ps23	Late
ENSMUSG00000102471	RP24-505E24.2	Late
ENSMUSG00000058700	Gm8724	Late
ENSMUSG00000071475	Rpl21-ps5	Late
ENSMUSG00000082926	Gm8172	Late
ENSMUSG00000082741	Gm9703	Late
ENSMUSG00000084403	Rps15a-ps8	Late
ENSMUSG00000095137	Rps12-ps17	Late
ENSMUSG00000081684	Rps2-ps13	Late
ENSMUSG00000100648	Gm28659	Late
ENSMUSG00000073607	Gm10548	Late
ENSMUSG00000083743	Gm12421	Late
ENSMUSG00000058905	Gm10051	Late
ENSMUSG00000068262	Gm5879	Late
ENSMUSG00000060068	Gm12222	Late
ENSMUSG00000098016	Gm9211	Late
ENSMUSG00000081600	Gm12286	Late
ENSMUSG00000099714	Gm20587	Late
ENSMUSG00000081126	Gm15784	Late
ENSMUSG00000084022	Gm16459	Late
ENSMUSG00000097989	Gm4335	Late
ENSMUSG00000070490	Gm10293	Late
ENSMUSG00000081974	Gm11960	Late
ENSMUSG00000083245	Gm11185	Late
ENSMUSG00000096157	Gm5472	Late
ENSMUSG00000062365	Gm4968	Late
ENSMUSG00000094185	Gm5445	Late
ENSMUSG00000084083	Gm15782	Late
ENSMUSG00000098190	Gm5210	Late
ENSMUSG00000081953	Gm12435	Late
ENSMUSG00000085099	Gm16288	Late
ENSMUSG00000044757	Gm6430	Late
ENSMUSG00000080994	Gm13464	Late
ENSMUSG00000084007	Gm9003	Late
ENSMUSG00000045609	Gm5455	Late
ENSMUSG00000092374	Gm6623	Late
ENSMUSG00000083212	Gm12274	Late
ENSMUSG00000070729	Gm12966	Late
ENSMUSG00000082623	Gm15493	Late
ENSMUSG00000082476	Gm12242	Late
ENSMUSG00000086846	Gm13642	Late
ENSMUSG00000055795	Gm5160	Late
ENSMUSG00000097977	Gm5652	Late
ENSMUSG00000078289	Gm10923	Late
ENSMUSG00000081100	Gm14630	Late
ENSMUSG00000081587	Gm14926	Late
ENSMUSG00000083661	Gm11473	Late
ENSMUSG00000082380	Gm12218	Late
ENSMUSG00000085738	Gm12335	Late
ENSMUSG00000101262	Gm8326	Late
ENSMUSG00000099891	Gm5575	Late
ENSMUSG00000100025	Gm8141	Late
ENSMUSG00000090305	Gm5459	Late
ENSMUSG00000080892	Gm9266	Late
ENSMUSG00000083311	Gm5643	Late
ENSMUSG00000092341	Malat1	Late
ENSMUSG00000081329	Gm12492	Late
ENSMUSG00000083088	Gm14153	Late
ENSMUSG00000083318	Gm15192	Late
ENSMUSG00000083077	Gm14126	Late
ENSMUSG00000083723	Rpl23a-ps14	Late
ENSMUSG00000062758	Gm16477	Late
ENSMUSG00000081059	Gm11945	Late
ENSMUSG00000089966	Gm16030	Late
ENSMUSG00000091818	Rpl19-ps4	Late
ENSMUSG00000081783	Gm15599	Late
ENSMUSG00000101236	Gm6750	Late
ENSMUSG00000082054	Psmb6-ps	Late
ENSMUSG00000085487	Gm15654	Late
ENSMUSG00000082552	Gm11850	Late
ENSMUSG00000091825	Gm5778	Late
ENSMUSG00000081418	Gm14830	Late
ENSMUSG00000082164	Gm13360	Late
ENSMUSG00000063586	Gm5513	Late
ENSMUSG00000083922	Gm3835	Late
ENSMUSG00000099741	Gm5253	Late
ENSMUSG00000084302	Gm12194	Late
ENSMUSG00000073569	Gm10540	Late
ENSMUSG00000104177	RP24-356H12.1	Late
ENSMUSG00000059179	Gm8991	Late
ENSMUSG00000081965	Gm11620	Late
ENSMUSG00000103764	RP23-276K18.1	Late
ENSMUSG00000081153	Gm11401	Late
ENSMUSG00000101498	Gm2950	Late
ENSMUSG00000081844	Gm11241	Late
ENSMUSG00000090489	Gm17415	Late
ENSMUSG00000080760	Gm7571	Late
ENSMUSG00000083406	Gm8410	Late
ENSMUSG00000066958	Gm16391	Late
ENSMUSG00000081369	Gm11896	Late
ENSMUSG00000083407	Gm13176	Late
ENSMUSG00000083438	Gm5402	Late
ENSMUSG00000081887	Gm12097	Late
ENSMUSG00000082467	Gm6743	Late
ENSMUSG00000059647	Gm10068	Late
ENSMUSG00000081805	Gm14335	Late
ENSMUSG00000092281	Hmgb1-ps7	Late
ENSMUSG00000083822	Hmgb1-ps5	Late
ENSMUSG00000096006	Gm21596	Late
ENSMUSG00000082379	Gm13884	Late
ENSMUSG00000083993	Gm14398	Late
ENSMUSG00000082625	Gm15204	Late
ENSMUSG00000083830	Gm8839	Late
ENSMUSG00000091223	Gm8775	Late
ENSMUSG00000080851	Gm12094	Late
ENSMUSG00000081167	Gm8880	Late
ENSMUSG00000081295	Gm6275	Late
ENSMUSG00000104226	RP23-404K2.2	Late
ENSMUSG00000021927	Gm5803	Late
ENSMUSG00000096789	Gm10257	Late
ENSMUSG00000100895	Gm28685	Late
ENSMUSG00000082611	Gm7746	Late
ENSMUSG00000082461	Gm8844	Late
ENSMUSG00000091442	Gm17031	Late
ENSMUSG00000080778	Gm7199	Late
ENSMUSG00000081505	Gm8644	Late
ENSMUSG00000081073	Gm13758	Late
ENSMUSG00000104222	RP23-349K15.2	Late
ENSMUSG00000073226	Gm10482	Late
ENSMUSG00000081325	Gm12599	Late
ENSMUSG00000081557	Gm5697	Late
ENSMUSG00000082930	Gm13462	Late
ENSMUSG00000058101	1700084J12Rik	Late
ENSMUSG00000104265	RP24-179K8.4	Late
ENSMUSG00000081164	Gm8722	Late
ENSMUSG00000081042	Psmb7-ps2	Late
ENSMUSG00000099423	Gm17826	Late
ENSMUSG00000068480	Gm7551	Late
ENSMUSG00000081923	Gm9062	Late
ENSMUSG00000082315	Gm16523	Late
ENSMUSG00000082912	Gm8770	Late
ENSMUSG00000081239	Gm11836	Late
ENSMUSG00000081514	Gm14673	Late
ENSMUSG00000060680	Gm8894	Late
ENSMUSG00000081563	Gm12635	Late
ENSMUSG00000089735	Gm8428	Late
ENSMUSG00000081788	Gm5898	Late
ENSMUSG00000084292	Gm13535	Late
ENSMUSG00000081647	Gm13022	Late
ENSMUSG00000081651	Gm15530	Late
ENSMUSG00000081971	Gm14115	Late
ENSMUSG00000083288	Csnk2a1-ps	Late
ENSMUSG00000083834	Gm12577	Late
ENSMUSG00000080928	Hmgb1-ps6	Late
ENSMUSG00000103986	RP23-174P13.4	Late
ENSMUSG00000083253	Gm7108	Late
ENSMUSG00000069913	Anp32-ps	Late
ENSMUSG00000083948	Gm7158	Late
ENSMUSG00000081519	Gm13331	Late
ENSMUSG00000090114	Gm3076	Late
ENSMUSG00000082503	Gm12229	Late
ENSMUSG00000096726	Gm5558	Late
ENSMUSG00000081389	Gm13368	Late
ENSMUSG00000090674	Gm17082	Late
ENSMUSG00000068243	Gm7079	Late
ENSMUSG00000093392	Gm6061	Late
ENSMUSG00000083832	Gm13771	Late
ENSMUSG00000074034	Gm5921	Late
ENSMUSG00000081302	Gm12020	Late
ENSMUSG00000061242	Gm9104	Late
ENSMUSG00000081228	Gm16089	Late
ENSMUSG00000092072	Gm4540	Late
ENSMUSG00000081824	BC002163	Late
ENSMUSG00000082549	Gm14813	Late
ENSMUSG00000071532	Gm10335	Late
ENSMUSG00000100020	Gm19086	Late
ENSMUSG00000081810	Gm11878	Late
ENSMUSG00000082035	Rpl17-ps8	Late
ENSMUSG00000091315	Gm17214	Late
ENSMUSG00000083483	Gm14044	Late
ENSMUSG00000060566	Rpl21-ps3	Late
ENSMUSG00000074930	Gm13981	Late
ENSMUSG00000080059	Rps19-ps3	Late
ENSMUSG00000081975	Gm12482	Late
ENSMUSG00000080790	Gm7638	Late
ENSMUSG00000082604	Gm8482	Late
ENSMUSG00000098013	Gm9135	Late
ENSMUSG00000101777	Gm9127	Late
ENSMUSG00000081132	Gm13744	Late
ENSMUSG00000084116	Gm12460	Late
ENSMUSG00000083910	Gm13604	Late
ENSMUSG00000080198	Gm13573	Late
ENSMUSG00000083011	Gm12816	Late
ENSMUSG00000081461	Rpl30-ps11	Late
ENSMUSG00000083826	Gm13039	Late
ENSMUSG00000059912	Rpl21-ps6	Late
ENSMUSG00000082510	Gm11793	Late
ENSMUSG00000080718	Gm8019	Late
ENSMUSG00000082122	Gm11809	Late
ENSMUSG00000083055	Gm14140	Late
ENSMUSG00000089988	Gm16238	Late
ENSMUSG00000090381	Gm6158	Late
ENSMUSG00000101612	Gm7933	Late
ENSMUSG00000099492	Gm5525	Late
ENSMUSG00000064315	Rpl21-ps10	Late
ENSMUSG00000066543	Rpl17-ps9	Late
ENSMUSG00000085897	Gm11604	Late
ENSMUSG00000083878	Gm12034	Late
ENSMUSG00000091194	Gm19840	Late
ENSMUSG00000081413	Gm14088	Late
ENSMUSG00000091460	Gm7808	Late
ENSMUSG00000057499	Gm6177	Late
ENSMUSG00000071671	Gm10343	Late
ENSMUSG00000080873	Rpl30-ps3	Late
ENSMUSG00000083374	Gm11449	Late
ENSMUSG00000074547	Gm10712	Late
ENSMUSG00000082262	Gm14730	Late
ENSMUSG00000082465	Rps6-ps3	Late
ENSMUSG00000101502	Rpl7a-ps10	Late
ENSMUSG00000084284	Tpt1-ps6	Late
ENSMUSG00000082746	Rps12-ps1	Late
ENSMUSG00000056849	Gm16415	Late
ENSMUSG00000070667	Rpl31-ps10	Late
ENSMUSG00000084164	Gm13902	Late
ENSMUSG00000100007	Gm5527	Late
ENSMUSG00000082189	Gm4784	Late
ENSMUSG00000051732	Pabpc2	Late
ENSMUSG00000080998	Gm5384	Late
ENSMUSG00000083218	Gm16425	Late
ENSMUSG00000093748	Gm19031	Late
ENSMUSG00000039224	D1Pas1	Late
ENSMUSG00000097959	Gm6931	Late
ENSMUSG00000098226	Gm5272	Late
ENSMUSG00000049231	Gm12497	Late
ENSMUSG00000084173	Gm5287	Late
ENSMUSG00000098151	Gm10292	Late
ENSMUSG00000041571	Sepw1	Late
ENSMUSG00000101171	Gm7593	Late
ENSMUSG00000081106	Gm7155	Late
ENSMUSG00000099980	Gm5619	Late
ENSMUSG00000102220	Rpl23a-ps5	Late
ENSMUSG00000081396	Gm15132	Late
ENSMUSG00000100720	AC098736.2	Late
ENSMUSG00000083162	Gm4917	Late
ENSMUSG00000083200	Gm15066	Late
ENSMUSG00000066693	Gm7493	Late
ENSMUSG00000082495	Gm12570	Late
ENSMUSG00000085278	Gm12841	Late
ENSMUSG00000099057	Gm27185	Late
ENSMUSG00000046411	Rps4l-ps	Late
ENSMUSG00000100383	Gm28688	Late
ENSMUSG00000081235	Gm14788	Late
ENSMUSG00000081187	3110067C02Rik	Late
ENSMUSG00000098330	Gm27257	Late
ENSMUSG00000091095	Gm17305	Late
ENSMUSG00000100554	Gm7690	Late
ENSMUSG00000101130	Gm19637	Late
ENSMUSG00000081624	Gm6912	Late
ENSMUSG00000084289	Gm6977	Late
ENSMUSG00000101372	Gm19028	Late
ENSMUSG00000082080	Gm9246	Late
ENSMUSG00000102984	RP24-390D21.4	Late
ENSMUSG00000090126	4930519F09Rik	Late
ENSMUSG00000061833	Gm6311	Late
ENSMUSG00000083651	Gm11524	Late
ENSMUSG00000099671	Gm18183	Late
ENSMUSG00000084168	Atp5l2-ps	Late
ENSMUSG00000082415	Gm12486	Late
ENSMUSG00000083582	Gm15393	Late
ENSMUSG00000081729	Hspa9-ps1	Late
ENSMUSG00000082457	Gm13776	Late
ENSMUSG00000083076	Gm11408	Late
ENSMUSG00000081021	Gm11964	Late
ENSMUSG00000092247	Gm20426	Late
ENSMUSG00000075276	Gm13653	Late
ENSMUSG00000082870	Gm12165	Late
ENSMUSG00000100319	Gm5256	Late
ENSMUSG00000081459	Llph-ps1	Late
ENSMUSG00000072789	Gm10420	Late
ENSMUSG00000084333	Gm11599	Late
ENSMUSG00000074250	Gm10653	Late
ENSMUSG00000081170	Gm12922	Late
ENSMUSG00000083087	Gm11249	Late
ENSMUSG00000083364	Llph-ps2	Late
ENSMUSG00000083820	Gm6415	Late
ENSMUSG00000090224	Gm15974	Late
ENSMUSG00000094530	Gm21399	Late
ENSMUSG00000091942	Gm17138	Late
ENSMUSG00000063129	Aldoart2	Late
ENSMUSG00000082076	Gm8659	Late
ENSMUSG00000068674	Gm10247	Late
ENSMUSG00000081467	Gm13337	Late
ENSMUSG00000040414	Slc25a28	Late
ENSMUSG00000101122	Gm17971	Late
ENSMUSG00000044645	Gm7334	Late
ENSMUSG00000082660	Gm14612	Late
ENSMUSG00000082368	Gm11225	Late
ENSMUSG00000102948	RP23-177A20.1	Late
ENSMUSG00000084325	Gm15550	Late
ENSMUSG00000066629	Rpl36-ps3	Late
ENSMUSG00000081744	Gm5721	Late
ENSMUSG00000091401	Gm9252	Late
ENSMUSG00000082280	Gm7901	Late
ENSMUSG00000103295	RP23-272N23.1	Late
ENSMUSG00000062582	Rpl30-ps8	Late
ENSMUSG00000066487	Gm5786	Late
ENSMUSG00000101564	Gm5703	Late
ENSMUSG00000092464	Gm8902	Late
ENSMUSG00000081881	Gm14752	Late
ENSMUSG00000085066	Gm4989	Late
ENSMUSG00000059585	Ube2nl	Late
ENSMUSG00000082877	Gm13009	Late
ENSMUSG00000100065	Gm18969	Late
ENSMUSG00000098893	Gm17828	Late
ENSMUSG00000081712	Gm12096	Late
ENSMUSG00000082429	Gm13171	Late
ENSMUSG00000099592	Gm5264	Late
ENSMUSG00000057990	E030024N20Rik	Late
ENSMUSG00000099115	Gm17190	Late
ENSMUSG00000081732	Gm15495	Late
ENSMUSG00000083199	Gm9432	Late
ENSMUSG00000082128	Gm11824	Late
ENSMUSG00000083207	Gm14780	Late
ENSMUSG00000094649	Gm7102	Late
ENSMUSG00000066270	Gm10157	Late
ENSMUSG00000068487	Gm4943	Late
ENSMUSG00000096486	Gm5426	Late
ENSMUSG00000081382	Rpl18-ps1	Late
ENSMUSG00000060198	Gm11353	Late
ENSMUSG00000082064	Rpl5-ps2	Late
ENSMUSG00000089906	Gm6428	Late
ENSMUSG00000082715	Gm11633	Late
ENSMUSG00000102117	Rpsa-ps1	Late
ENSMUSG00000066489	Rpl26-ps2	Late
ENSMUSG00000082203	Gm15636	Late
ENSMUSG00000061390	Gm7866	Late
ENSMUSG00000079942	Rpl28-ps3	Late
ENSMUSG00000080932	Gm10224	Late
ENSMUSG00000081431	Gm15483	Late
ENSMUSG00000083914	Rps18-ps1	Late
ENSMUSG00000096699	Rps19-ps4	Late
ENSMUSG00000097803	Rpl31-ps16	Late
ENSMUSG00000085812	Gm15843	Late
ENSMUSG00000064231	Gm5321	Late
ENSMUSG00000083320	Gm13935	Late
ENSMUSG00000081030	Gm12704	Late
ENSMUSG00000082417	Gm13740	Late
ENSMUSG00000059835	Rpl13-ps3	Late
ENSMUSG00000083121	Gm6341	Late
ENSMUSG00000082328	Gm13921	Late
ENSMUSG00000055093	Gm8430	Late
ENSMUSG00000070271	Gm13268	Late
ENSMUSG00000082480	Gm11687	Late
ENSMUSG00000057657	Rps18-ps3	Late
ENSMUSG00000081210	Gm12933	Late
ENSMUSG00000066475	Gm10268	Late
ENSMUSG00000059461	Gm7331	Late
ENSMUSG00000086567	Gm2830	Late
ENSMUSG00000068689	Rps19-ps9	Late
ENSMUSG00000097552	Rps19-ps12	Late
ENSMUSG00000104074	RP24-363G13.1	Late
ENSMUSG00000064281	Rpl19-ps1	Late
ENSMUSG00000082013	Gm13216	Late
ENSMUSG00000070692	Rps12-ps10	Late
ENSMUSG00000081797	Gm8662	Late
ENSMUSG00000081613	Gm12109	Late
ENSMUSG00000082901	Gm14323	Late
ENSMUSG00000074412	Gm10689	Late
ENSMUSG00000101199	Gm9687	Late
ENSMUSG00000061488	Rpl27a-ps1	Late
ENSMUSG00000062742	Gm5239	Late
ENSMUSG00000062458	Gm8623	Late
ENSMUSG00000081274	Gm15727	Late
ENSMUSG00000081992	Gm13408	Late
ENSMUSG00000095847	Gm5451	Late
ENSMUSG00000090451	Gm6133	Late
ENSMUSG00000098915	Rpl15-ps2	Late
ENSMUSG00000091449	Gm10269	Late
ENSMUSG00000063442	Gm7117	Late
ENSMUSG00000094989	Rpl9-ps4	Late
ENSMUSG00000082543	Gm14336	Late
ENSMUSG00000059565	Gm5292	Late
ENSMUSG00000102193	RP24-212P5.2	Late
ENSMUSG00000066771	Gm5614	Late
ENSMUSG00000102135	RP23-5K7.4	Late
ENSMUSG00000097719	Rpl31-ps18	Late
ENSMUSG00000101682	Gm29228	Late
ENSMUSG00000066626	Gm5121	Late
ENSMUSG00000081491	Gm12778	Late
ENSMUSG00000082474	Gm8213	Late
ENSMUSG00000082609	Gm15464	Late
ENSMUSG00000084131	Rpl3-ps2	Late
ENSMUSG00000063754	Gm10136	Late
ENSMUSG00000071141	Rpl36a-ps3	Late
ENSMUSG00000065950	Gm5908	Late
ENSMUSG00000097679	Rps19-ps5	Late
ENSMUSG00000059776	Gm10071	Late
ENSMUSG00000083004	Gm13413	Late
ENSMUSG00000090319	Gm4462	Late
ENSMUSG00000086859	2810008D09Rik	Late
ENSMUSG00000095600	Gm9457	Late
ENSMUSG00000019836	Amd-ps4	Late
ENSMUSG00000083619	Gm14414	Late
ENSMUSG00000098057	Gm6283	Late
ENSMUSG00000098106	Gm5350	Late
ENSMUSG00000080700	Gm15981	Late
ENSMUSG00000082398	Gm11927	Late
ENSMUSG00000082879	Gm13525	Late
ENSMUSG00000083043	Gm13433	Late
ENSMUSG00000081339	Gm16044	Late
ENSMUSG00000082145	Gm12312	Late
ENSMUSG00000081121	Gm12791	Late
ENSMUSG00000085340	Gm16335	Late
ENSMUSG00000081841	Gm13444	Late
ENSMUSG00000093537	Gm7584	Late
ENSMUSG00000098561	Gm27154	Late
ENSMUSG00000086577	Gm7076	Late
ENSMUSG00000100481	Gm7114	Late
ENSMUSG00000038393	Txnip	Late
ENSMUSG00000081208	Gm11400	Late
ENSMUSG00000089993	Gm5822	Late
ENSMUSG00000057605	Gm6807	Late
ENSMUSG00000084314	Rps15a-ps3	Late
ENSMUSG00000078240	Gm3550	Late
ENSMUSG00000096269	Rpl31-ps21	Late
ENSMUSG00000051723	Rpl31-ps13	Late
ENSMUSG00000082475	Gm7206	Late
ENSMUSG00000080774	Gm9143	Late
ENSMUSG00000081159	Gm6023	Late
ENSMUSG00000082061	Gm12726	Late
ENSMUSG00000101501	Rps27a-ps1	Late
ENSMUSG00000098559	Gm15013	Late
ENSMUSG00000100228	Gm29257	Late
ENSMUSG00000062461	Gm5453	Late
ENSMUSG00000082481	Rps12-ps19	Late
ENSMUSG00000090862	Rps13	Late
ENSMUSG00000081434	Gm14165	Late
ENSMUSG00000081640	Rplp0-ps1	Late
ENSMUSG00000084345	Rpl17-ps4	Late
ENSMUSG00000094122	Rpl31-ps9	Late
ENSMUSG00000072692	Rpl37rt	Late
ENSMUSG00000062152	Rpl21-ps14	Late
ENSMUSG00000067058	Rps15a-ps5	Late
ENSMUSG00000083328	Gm11826	Late
ENSMUSG00000081233	Gm12857	Late
ENSMUSG00000062284	Gm6030	Late
ENSMUSG00000068324	Gm10029	Late
ENSMUSG00000098181	Rps12l2	Late
ENSMUSG00000081605	Gm15953	Late
ENSMUSG00000082244	Gm8503	Late
ENSMUSG00000083468	Gm9431	Late
ENSMUSG00000083804	Gm13676	Late
ENSMUSG00000081969	Gm16471	Late
ENSMUSG00000082895	Rpsa-ps9	Late
ENSMUSG00000086925	Gm6286	Late
ENSMUSG00000091730	Gm17230	Late
ENSMUSG00000092540	Gm8738	Late
ENSMUSG00000084004	Gm12047	Late
ENSMUSG00000081633	Gm8522	Late
ENSMUSG00000100441	Gm7266	Late
ENSMUSG00000099471	Gm8451	Late
ENSMUSG00000028495	Rps6	Late
ENSMUSG00000091742	Gm5093	Late
ENSMUSG00000060377	Rpl36a-ps1	Late
ENSMUSG00000081763	Gm9435	Late
ENSMUSG00000081255	Gm5380	Late
ENSMUSG00000063875	Rps6-ps1	Late
ENSMUSG00000083382	Gm6433	Late
ENSMUSG00000081895	Rpl17-ps10	Late
ENSMUSG00000025922	Gm5045	Late
ENSMUSG00000101795	Gm5835	Late
ENSMUSG00000068604	Gm8225	Late
ENSMUSG00000080972	Gm16061	Late
ENSMUSG00000085893	Gm12091	Late
ENSMUSG00000091831	Gm4707	Late
ENSMUSG00000050114	Prdx6b	Late
ENSMUSG00000083737	Prdx6-ps2	Late
ENSMUSG00000100656	Gm8525	Late
ENSMUSG00000072978	Gm5830	Late
ENSMUSG00000049235	Gm7324	Late
ENSMUSG00000080979	Gm13675	Late
ENSMUSG00000080992	Psmb5-ps	Late
ENSMUSG00000086123	Gm16060	Late
ENSMUSG00000092014	Gm4468	Late
ENSMUSG00000082012	Gm5257	Late
ENSMUSG00000081594	Gm15467	Late
ENSMUSG00000100702	Gm8976	Late
ENSMUSG00000083271	Gm12384	Late
ENSMUSG00000082760	Gm15546	Late
ENSMUSG00000083454	Gm13226	Late
ENSMUSG00000083863	Gm13341	Late
ENSMUSG00000082017	Gm11229	Late
ENSMUSG00000082738	Gm15422	Late
ENSMUSG00000083399	Gm15033	Late
ENSMUSG00000081404	Gm15694	Late
ENSMUSG00000082974	Gm15129	Late
ENSMUSG00000087457	Gm7799	Late
ENSMUSG00000092552	Gm4287	Late
ENSMUSG00000102546	RP23-155G2.1	Late
ENSMUSG00000057685	Gm8526	Late
ENSMUSG00000092510	Gm18343	Late
ENSMUSG00000094597	Gm4810	Late
ENSMUSG00000100078	Gm6170	Late
ENSMUSG00000081453	Gm6767	Late
ENSMUSG00000082066	Gm13904	Late
ENSMUSG00000056797	Gm4889	Late
ENSMUSG00000082399	Gm14036	Late
ENSMUSG00000081643	Gm11605	Late
ENSMUSG00000075581	Gm16409	Late
ENSMUSG00000081572	Gm14138	Late
ENSMUSG00000066407	Gm10263	Late
ENSMUSG00000084300	Gm6954	Late
ENSMUSG00000080974	Gm9009	Late
ENSMUSG00000084050	Gm14439	Late
ENSMUSG00000098080	Gm5732	Late
ENSMUSG00000071102	Gm10313	Late
ENSMUSG00000080775	Gm6368	Late
ENSMUSG00000083054	Gm12986	Late
ENSMUSG00000078162	Gm2574	Late
ENSMUSG00000098083	Gm8957	Late
ENSMUSG00000083754	Gm7803	Late
ENSMUSG00000096158	Gm21827	Late
ENSMUSG00000081641	Gm9439	Late
ENSMUSG00000089817	Gm7162	Late
ENSMUSG00000098224	Gm7985	Late
ENSMUSG00000084081	Gm12057	Late
ENSMUSG00000100701	Gm19587	Late
ENSMUSG00000083856	Gm13886	Late
ENSMUSG00000090994	Gm6153	Late
ENSMUSG00000091941	Gm7399	Late
ENSMUSG00000083640	Gm8876	Late
ENSMUSG00000100361	Gm7063	Late
ENSMUSG00000103597	RP24-84B18.1	Late
ENSMUSG00000020870	Cdc34-ps	Late
ENSMUSG00000081819	Gm12722	Late
ENSMUSG00000096160	Gm3436	Late
ENSMUSG00000059343	Aldoart1	Late
ENSMUSG00000084093	Gm16418	Late
ENSMUSG00000050174	Nudt6	Late
ENSMUSG00000089686	Mnd1-ps	Late
ENSMUSG00000035649	Zcchc7	Late
ENSMUSG00000029633	Gm5578	Late
ENSMUSG00000048334	Gm8258	Late
ENSMUSG00000081227	Gm13082	Late
ENSMUSG00000087692	Gm11940	Late
ENSMUSG00000083761	Pgam1-ps1	Late
ENSMUSG00000083768	Gm15362	Late
ENSMUSG00000043993	2900052L18Rik	Late
ENSMUSG00000103898	RP24-562D16.4	Late
ENSMUSG00000000248	Clec2g	Late
ENSMUSG00000097309	Gm17249	Late
ENSMUSG00000097797	Gm26901	Late
ENSMUSG00000087624	9230111E07Rik	Late
ENSMUSG00000080832	M6pr-ps	Late
ENSMUSG00000082840	Gm16421	Late
ENSMUSG00000071103	1700029J07Rik	Late
ENSMUSG00000084846	A730011C13Rik	Late
ENSMUSG00000044330	Gm9790	Late
ENSMUSG00000084797	Gm14321	Late
ENSMUSG00000038843	Gcnt1	Late
ENSMUSG00000022353	Mtss1	Late
ENSMUSG00000028124	Gclm	Late
ENSMUSG00000082382	Gm14970	Late
ENSMUSG00000100690	Gm4322	Late
ENSMUSG00000071343	Gm10327	Late
ENSMUSG00000084413	Gm12017	Late
ENSMUSG00000030203	Dusp16	Late
ENSMUSG00000045103	Dmd	Late
ENSMUSG00000026247	Ecel1	Late
ENSMUSG00000047547	Cltb	Late
ENSMUSG00000026833	Olfm1	Late
ENSMUSG00000024725	Ostf1	Late
ENSMUSG00000028039	Efna3	Late
ENSMUSG00000021294	Kif26a	Late
ENSMUSG00000080747	Gm14016	Late
ENSMUSG00000014813	Stc1	Late
ENSMUSG00000050511	Oprd1	Late
ENSMUSG00000081173	Gm13500	Late
ENSMUSG00000083715	Gm14202	Late
ENSMUSG00000021749	Oit1	Late
ENSMUSG00000103419	RP24-445D5.1	Late
ENSMUSG00000024646	Cyb5a	Late
ENSMUSG00000050914	Ankrd37	Late
ENSMUSG00000081996	Gm7153	Late
ENSMUSG00000054150	Syne3	Late
ENSMUSG00000100975	Gm28875	Late
ENSMUSG00000017057	Il13ra1	Late
ENSMUSG00000070880	Gad1	Late
ENSMUSG00000018411	Mapt	Late
ENSMUSG00000025221	Kcnip2	Late
ENSMUSG00000102036	1700063K16Rik	Late
ENSMUSG00000086691	Gm15432	Late
ENSMUSG00000044024	Rell2	Late
ENSMUSG00000084018	Gm11895	Late
ENSMUSG00000018102	Hist1h2bc	Late
ENSMUSG00000030380	Mzf1	Late
ENSMUSG00000039798	2600006K01Rik	Late
ENSMUSG00000074236	Gm9387	Late
ENSMUSG00000081034	Gm5944	Late
ENSMUSG00000022577	Ly6h	Late
ENSMUSG00000035486	Plk5	Late
ENSMUSG00000041679	Lrrc29	Late
ENSMUSG00000051074	4930579K19Rik	Late
ENSMUSG00000022358	Fbxo32	Late
ENSMUSG00000080777	Gm15365	Late
ENSMUSG00000031647	Mfap3l	Late
ENSMUSG00000091722	Siah3	Late
ENSMUSG00000038742	Angptl6	Late
ENSMUSG00000028634	Hivep3	Late
ENSMUSG00000020142	Slc1a4	Late
ENSMUSG00000036915	Kirrel2	Late
ENSMUSG00000031342	Gpm6b	Late
ENSMUSG00000086915	Gm16365	Late
ENSMUSG00000030590	Fam98c	Late
ENSMUSG00000052135	Foxo6	Late
ENSMUSG00000074625	Arhgap40	Late
ENSMUSG00000053192	Mllt11	Late
ENSMUSG00000039717	Ralyl	Late
ENSMUSG00000044499	Hs3st5	Late
ENSMUSG00000096025	Ralyl	Late
ENSMUSG00000097023	AI854517	Late
ENSMUSG00000031027	Stk33	Late
ENSMUSG00000102938	RP23-333L19.1	Late
ENSMUSG00000084160	Gm13345	Late
ENSMUSG00000094772	Rpl29-ps2	Late
ENSMUSG00000069986	Gm8054	Late
ENSMUSG00000103461	RP23-241J7.3	Late
ENSMUSG00000068226	Gm6723	Late
ENSMUSG00000092593	Gm20492	Late
ENSMUSG00000022342	Kcnv1	Late
ENSMUSG00000033577	Myo6	Late
ENSMUSG00000020638	Cmpk2	Late
ENSMUSG00000032269	Htr3a	Late
ENSMUSG00000038354	Ankrd35	Late
ENSMUSG00000062345	Serpinb2	Late
ENSMUSG00000102033	Gm28263	Late
ENSMUSG00000029282	Amtn	Late
ENSMUSG00000058975	Kcnc1	Late
ENSMUSG00000044609	Gm9294	Late
ENSMUSG00000063696	Gm8730	Late
ENSMUSG00000059883	Irak4	Late
ENSMUSG00000073478	D730003I15Rik	Late
ENSMUSG00000083481	Rps8-ps2	Late
ENSMUSG00000078700	D030028A08Rik	Late
ENSMUSG00000004085	Zak	Late
ENSMUSG00000037348	Paqr7	Late
ENSMUSG00000085501	Gm11772	Late
ENSMUSG00000033053	1700028P14Rik	Late
ENSMUSG00000087590	2410004N09Rik	Late
ENSMUSG00000072460	Atp5l-ps1	Late
ENSMUSG00000040447	Spns2	Late
ENSMUSG00000099647	Gm5776	Late
ENSMUSG00000035104	Eva1a	Late
ENSMUSG00000059900	Tmem40	Late
ENSMUSG00000014301	Pam16	Late
ENSMUSG00000081278	Gm13186	Late
ENSMUSG00000094320	Gm13202	Late
ENSMUSG00000093734	Gm25082	Late
ENSMUSG00000093514	Gm9320	Late
ENSMUSG00000097004	4731419I09Rik	Late
ENSMUSG00000020812	1810032O08Rik	Late
ENSMUSG00000049044	Rapgef4	Late
ENSMUSG00000028163	Nfkb1	Late
ENSMUSG00000040723	Rcsd1	Late
ENSMUSG00000044786	Zfp36	Late
ENSMUSG00000052760	A630001G21Rik	Late
ENSMUSG00000042644	Itpr3	Late
ENSMUSG00000003541	Ier3	Late
ENSMUSG00000087349	Gm12680	Late
ENSMUSG00000019850	Tnfaip3	Late
ENSMUSG00000024254	Abcg8	Late
ENSMUSG00000040505	Abcg5	Late
ENSMUSG00000027568	Ntsr1	Late
ENSMUSG00000074664	A830092H15Rik	Late
ENSMUSG00000022376	Adcy8	Late
ENSMUSG00000024211	Grm8	Late
ENSMUSG00000043807	Ly6g5b	Late
ENSMUSG00000010095	Slc3a2	Late
ENSMUSG00000030560	Ctsc	Late
ENSMUSG00000027375	Mal	Late
ENSMUSG00000026303	Mlph	Late
ENSMUSG00000063887	Nlgn1	Late
ENSMUSG00000035158	Mitf	Late
ENSMUSG00000059146	Ntrk3	Late
ENSMUSG00000029816	Gpnmb	Late
ENSMUSG00000035183	Slc24a5	Late
ENSMUSG00000022243	Slc45a2	Late
ENSMUSG00000096257	Gm6537	Late
ENSMUSG00000015090	Ptgds	Late
ENSMUSG00000004651	Tyr	Late
ENSMUSG00000025359	Pmel	Late
ENSMUSG00000022129	Dct	Late
ENSMUSG00000039691	Tspan10	Late
ENSMUSG00000024806	Mlana	Late
ENSMUSG00000068615	Gjd2	Late
ENSMUSG00000046408	1700067K01Rik	Late
ENSMUSG00000026315	Serpinb8	Late
ENSMUSG00000037577	Ephx3	Late
ENSMUSG00000050808	Muc15	Late
ENSMUSG00000055200	Sertad3	Late
ENSMUSG00000048616	Nog	Late
ENSMUSG00000102737	RP23-246H16.1	Late
ENSMUSG00000012123	Aim1l	Late
ENSMUSG00000035504	Reep6	Late
ENSMUSG00000044405	Adig	Late
ENSMUSG00000056938	Acbd4	Late
ENSMUSG00000021025	Nfkbia	Late
ENSMUSG00000097296	Gm26532	Late
ENSMUSG00000030256	Bhlhe41	Late
ENSMUSG00000015405	Ace2	Late
ENSMUSG00000052837	Junb	Late
ENSMUSG00000079164	Tlr5	Late
ENSMUSG00000031089	Slc6a14	Late
ENSMUSG00000032726	Bmp8a	Late
ENSMUSG00000102126	Gm29143	Late
ENSMUSG00000015312	Gadd45b	Late
ENSMUSG00000085148	Mir22hg	Late
ENSMUSG00000090394	4930523C07Rik	Late
ENSMUSG00000017412	Cacnb4	Late
ENSMUSG00000027463	Slc52a3	Late
ENSMUSG00000046694	Fam46b	Late
ENSMUSG00000086552	A730090H04Rik	Late
ENSMUSG00000020871	Dlx4	Late
ENSMUSG00000038415	Foxq1	Late
ENSMUSG00000040659	Efhd2	Late
ENSMUSG00000047446	Arl4a	Late
ENSMUSG00000024578	Il17b	Late
ENSMUSG00000041669	Prima1	Late
ENSMUSG00000082580	Gm13182	Late
ENSMUSG00000081789	Gm11893	Late
ENSMUSG00000058625	Gm17383	Late
ENSMUSG00000073371	Gm6594	Late
ENSMUSG00000035283	Adrb1	Late
ENSMUSG00000045287	Rtn4rl1	Late
ENSMUSG00000079965	Gm14853	Late
ENSMUSG00000045795	Whamm	Late
ENSMUSG00000084020	Wsb2-ps	Late
ENSMUSG00000051537	Gm5124	Late
ENSMUSG00000056777	Rpl21-ps13	Late
ENSMUSG00000071207	Gm8587	Late
ENSMUSG00000103293	RP24-487F9.1	Late
ENSMUSG00000081677	Mdk-ps1	Late
ENSMUSG00000081917	Gm15209	Late
ENSMUSG00000095692	Gm6901	Late
ENSMUSG00000096536	Gm5792	Late
ENSMUSG00000099112	Gm27406	Late
ENSMUSG00000101935	Gm17748	Late
ENSMUSG00000081086	Gm9506	Late
ENSMUSG00000089670	Gm16581	Late
ENSMUSG00000084046	Gm11833	Late
ENSMUSG00000091426	Gm17228	Late
ENSMUSG00000083767	Gm11405	Late
ENSMUSG00000083861	Gm9599	Late
ENSMUSG00000045952	Gm5548	Late
ENSMUSG00000081141	Gm11501	Late
ENSMUSG00000083544	Oat-rs1	Late
ENSMUSG00000083089	Gm4760	Late
ENSMUSG00000087569	Gm8464	Late
ENSMUSG00000098506	Gm18048	Late
ENSMUSG00000102270	RP23-466K3.1	Late
ENSMUSG00000058745	Gm9174	Late
ENSMUSG00000083449	Gm13487	Late
ENSMUSG00000089979	Gm15954	Late
ENSMUSG00000099591	Gm17969	Late
ENSMUSG00000099989	Gm20281	Late
ENSMUSG00000081705	Gm12582	Late
ENSMUSG00000043484	Gm5867	Late
ENSMUSG00000074978	Actg-ps1	Late
ENSMUSG00000080773	Gm12955	Late
ENSMUSG00000086004	Gm7805	Late
ENSMUSG00000090737	Gm6788	Late
ENSMUSG00000071273	Gm5145	Late
ENSMUSG00000085521	4930526A20Rik	Late
ENSMUSG00000081492	Gm9311	Late
ENSMUSG00000080759	Gm15573	Late
ENSMUSG00000051548	Gm6365	Late
ENSMUSG00000092376	Gm19203	Late
ENSMUSG00000081775	Gm12420	Late
ENSMUSG00000081540	Gm12538	Late
ENSMUSG00000084260	Gm12844	Late
ENSMUSG00000080768	Gm12219	Late
ENSMUSG00000082100	Glns-ps1	Late
ENSMUSG00000082096	Gm13505	Late
ENSMUSG00000035757	Selo	Late
ENSMUSG00000080719	Gm15532	Late
ENSMUSG00000082737	Gm12026	Late
ENSMUSG00000099946	Gm9496	Late
ENSMUSG00000101986	Gm6198	Late
ENSMUSG00000055763	Gm6910	Late
ENSMUSG00000091515	Zfp422-rs1	Late
ENSMUSG00000083250	Gm5403	Late
ENSMUSG00000086842	Gm15681	Late
ENSMUSG00000082852	Gm12021	Late
ENSMUSG00000095987	Gm13104	Late
ENSMUSG00000081052	Gm6305	Late
ENSMUSG00000090242	Gm16207	Late
ENSMUSG00000081390	Gm14538	Late
ENSMUSG00000101814	Gm17807	Late
ENSMUSG00000083660	Gm11853	Late
ENSMUSG00000095991	Gm17048	Late
ENSMUSG00000092269	Gm9577	Late
ENSMUSG00000046440	Gm5564	Late
ENSMUSG00000083171	Gm12321	Late
ENSMUSG00000082539	Gm15207	Late
ENSMUSG00000082253	Gm14639	Late
ENSMUSG00000099377	Gm6159	Late
ENSMUSG00000082996	Gm6238	Late
ENSMUSG00000084223	Gm12244	Late
ENSMUSG00000100913	Gm8392	Late
ENSMUSG00000081704	Gm14603	Late
ENSMUSG00000082517	Gm5757	Late
ENSMUSG00000081933	Gm14767	Late
ENSMUSG00000102493	RP23-393P20.1	Late
ENSMUSG00000071294	Gm5196	Late
ENSMUSG00000081068	Gm12804	Late
ENSMUSG00000084104	Gm13578	Late
ENSMUSG00000092458	Gm18737	Late
ENSMUSG00000083183	Gm15575	Late
ENSMUSG00000083279	Pex13-ps	Late
ENSMUSG00000084162	Gm11251	Late
ENSMUSG00000084378	Gm15238	Late
ENSMUSG00000097041	Pafah1b1-ps1	Late
ENSMUSG00000083655	Gm12099	Late
ENSMUSG00000083281	Gm13332	Late
ENSMUSG00000082111	Gm12479	Late
ENSMUSG00000083849	Gm13477	Late
ENSMUSG00000091305	Gm17100	Late
ENSMUSG00000069379	Gm4950	Late
ENSMUSG00000035215	Lsm7	Late
ENSMUSG00000043329	Gm8849	Late
ENSMUSG00000084817	Gm5526	Late
ENSMUSG00000081555	Gm6427	Late
ENSMUSG00000100222	Psmb6-ps2	Late
ENSMUSG00000083451	Gm11445	Late
ENSMUSG00000084320	Gm14125	Late
ENSMUSG00000069962	Gm5356	Late
ENSMUSG00000027245	Hypk	Late
ENSMUSG00000084014	Gm7209	Late
ENSMUSG00000093624	Mipep-ps	Late
ENSMUSG00000100432	Gm7539	Late
ENSMUSG00000084105	Gm13252	Late
ENSMUSG00000099658	Gm28980	Late
ENSMUSG00000082179	Gm11407	Late
ENSMUSG00000096449	Gm4076	Late
ENSMUSG00000081673	Gm14794	Late
ENSMUSG00000100514	Gm12960	Late
ENSMUSG00000081258	Gm14013	Late
ENSMUSG00000083219	Gm11410	Late
ENSMUSG00000083563	Gm13340	Late
ENSMUSG00000082884	Gm13339	Late
ENSMUSG00000100131	Gm28439	Late
ENSMUSG00000048709	Gm8666	Late
ENSMUSG00000081139	Gm13333	Late
ENSMUSG00000103760	RP23-348C6.7	Late
ENSMUSG00000098779	Gm8602	Late
ENSMUSG00000101209	Gm8524	Late
ENSMUSG00000082159	Gm7910	Late
ENSMUSG00000082571	Gm8737	Late
ENSMUSG00000083390	Gm13121	Late
ENSMUSG00000099870	Gm7200	Late
ENSMUSG00000058357	Gm6612	Late
ENSMUSG00000081907	Gm13731	Late
ENSMUSG00000021741	Gm5457	Late
ENSMUSG00000056943	Gm10015	Late
ENSMUSG00000075279	Mrpl23-ps1	Late
ENSMUSG00000104418	RP23-204N23.1	Late
ENSMUSG00000081967	Gm14017	Late
ENSMUSG00000086882	Gm13352	Late
ENSMUSG00000081932	Gm12331	Late
ENSMUSG00000081738	Hmgb1-ps2	Late
ENSMUSG00000084076	Gm14600	Late
ENSMUSG00000049460	Gm8396	Late
ENSMUSG00000080968	Gm1862	Late
ENSMUSG00000084259	Gm12040	Late
ENSMUSG00000104514	RP23-370E6.2	Late
ENSMUSG00000081262	Gm12261	Late
ENSMUSG00000081497	Gm15560	Late
ENSMUSG00000089808	Gm7241	Late
ENSMUSG00000081138	Gm12834	Late
ENSMUSG00000081787	Gm13991	Late
ENSMUSG00000083864	Gm13719	Late
ENSMUSG00000103733	RP23-32D13.1	Late
ENSMUSG00000015224	Cyp2j9	Late
ENSMUSG00000032295	Man2c1	Late
ENSMUSG00000081242	Gm15719	Late
ENSMUSG00000081781	Gm14753	Late
ENSMUSG00000055188	Rbm3os	Late
ENSMUSG00000062044	Lmtk3	Late
ENSMUSG00000002109	Ddb2	Late
ENSMUSG00000032298	Neil1	Late
ENSMUSG00000059159	Gm8129	Late
ENSMUSG00000093826	Gm6900	Late
ENSMUSG00000083022	Rps15a-ps6	Late
ENSMUSG00000037266	Rsrp1	Late
ENSMUSG00000074646	6430550D23Rik	Late
ENSMUSG00000094191	Rpl31-ps14	Late
ENSMUSG00000058838	Rps27a-ps2	Late
ENSMUSG00000068969	Rpl32-ps	Late
ENSMUSG00000024205	Rpl36-ps2	Late
ENSMUSG00000083378	Gm13196	Late
ENSMUSG00000100018	Gm7776	Late
ENSMUSG00000081715	Rps11-ps3	Late
ENSMUSG00000083337	Gm11539	Late
ENSMUSG00000057370	Rpl21-ps12	Late
ENSMUSG00000071303	Rps8-ps1	Late
ENSMUSG00000083757	Rps15a-ps4	Late
ENSMUSG00000101452	Gm28530	Late
ENSMUSG00000081275	Gm13875	Late
ENSMUSG00000086167	Gm13827	Late
ENSMUSG00000063739	Gm4963	Late
ENSMUSG00000061272	Gm14173	Late
ENSMUSG00000080006	Rps19-ps7	Late
ENSMUSG00000083424	Rpl35a-ps4	Late
ENSMUSG00000061863	Gm6822	Late
ENSMUSG00000078850	Gm2348	Late
ENSMUSG00000082337	Gm14723	Late
ENSMUSG00000024793	Tnfrsf25	Late
ENSMUSG00000019761	Krt10	Late
ENSMUSG00000073374	C030034I22Rik	Late
ENSMUSG00000074024	4632427E13Rik	Late
ENSMUSG00000078173	Lenep	Late
ENSMUSG00000084072	Gm11285	Late
ENSMUSG00000101219	Gm20302	Late
ENSMUSG00000081751	Gm14251	Late
ENSMUSG00000104166	RP24-511H12.7	Late
ENSMUSG00000100215	Gm8292	Late
ENSMUSG00000059483	Gm5528	Late
ENSMUSG00000083539	Gm12466	Late
ENSMUSG00000058607	Rpl31-ps20	Late
ENSMUSG00000095517	Gm13249	Late
ENSMUSG00000103423	RP23-349K2.1	Late
ENSMUSG00000063166	Gm5449	Late
ENSMUSG00000102545	RP24-253I2.1	Late
ENSMUSG00000102394	RP23-145A18.5	Late
ENSMUSG00000082040	Gm12046	Late
ENSMUSG00000083985	Gm12468	Late
ENSMUSG00000074580	4931440P22Rik	Late
ENSMUSG00000082109	Rpl19-ps12	Late
ENSMUSG00000083033	Gm9083	Late
ENSMUSG00000074108	Rpl10-ps2	Late
ENSMUSG00000078192	Gm7290	Late
ENSMUSG00000080783	Gm8250	Late
ENSMUSG00000082196	Gm14231	Late
ENSMUSG00000090323	Gm5263	Late
ENSMUSG00000052675	Zfp112	Late
ENSMUSG00000055415	Atp10b	Late
ENSMUSG00000040488	Ltbp4	Late
ENSMUSG00000097784	A430105J06Rik	Late
ENSMUSG00000029720	Gm20605	Late
ENSMUSG00000090086	AI480526	Late
ENSMUSG00000097061	9330151L19Rik	Late
ENSMUSG00000054934	Kcnmb4	Late
ENSMUSG00000048406	B330016D10Rik	Late
ENSMUSG00000104253	RP24-98O21.4	Late
ENSMUSG00000097350	4732491K20Rik	Late
ENSMUSG00000102269	RP23-285G23.3	Late
ENSMUSG00000102914	RP24-372I24.3	Late
ENSMUSG00000081642	Gm13532	Late
ENSMUSG00000080829	Gm8545	Late
ENSMUSG00000081695	Rpsa-ps5	Late
ENSMUSG00000082836	Gm13612	Late
ENSMUSG00000085741	5430405H02Rik	Late
ENSMUSG00000090099	Gm8837	Late
ENSMUSG00000079223	Gm8778	Late
ENSMUSG00000081629	Eif3s6-ps1	Late
ENSMUSG00000097032	4930539J05Rik	Late
ENSMUSG00000082309	Gm12123	Late
ENSMUSG00000091989	Gm17257	Late
ENSMUSG00000053208	Kat2b-ps	Late
ENSMUSG00000080791	Akirin1-ps	Late
ENSMUSG00000090119	Gm8185	Late
ENSMUSG00000080899	Gm9109	Late
ENSMUSG00000100347	Gm7895	Late
ENSMUSG00000047787	Flrt1	Late
ENSMUSG00000097430	Gm10544	Late
ENSMUSG00000023904	Hcfc1r1	Late
ENSMUSG00000101320	Gm28529	Late
ENSMUSG00000096983	2010015M23Rik	Late
ENSMUSG00000097121	D130020L05Rik	Late
ENSMUSG00000078552	Dcdc2b	Late
ENSMUSG00000082514	Gm11452	Late
ENSMUSG00000023055	Calcoco1	Late
ENSMUSG00000099427	Gm18700	Late
ENSMUSG00000055862	Izumo4	Late
ENSMUSG00000086782	E130102H24Rik	Late
ENSMUSG00000083979	Gm12527	Late
ENSMUSG00000097640	Gm20033	Late
ENSMUSG00000082669	Gm5393	Late
ENSMUSG00000094082	Gm12452	Late
ENSMUSG00000081176	H3f3a-ps2	Late
ENSMUSG00000080869	Gm11856	Late
ENSMUSG00000060730	Gm10086	Late
ENSMUSG00000054514	Atad3aos	Late
ENSMUSG00000082647	Gm14056	Late
ENSMUSG00000083961	Gm13725	Late
ENSMUSG00000039145	Camk1d	Late
ENSMUSG00000068748	Ptprz1	Late
ENSMUSG00000022564	Grina	Late
ENSMUSG00000039787	Cercam	Late
ENSMUSG00000051022	Hs3st1	Late
ENSMUSG00000037847	Nmrk1	Late
ENSMUSG00000050222	Il17d	Late
ENSMUSG00000080981	Gm12161	Late
ENSMUSG00000038555	Reep2	Late
ENSMUSG00000035199	Arl6ip5	Late
ENSMUSG00000062619	2310039H08Rik	Late
ENSMUSG00000085614	1700123M08Rik	Late
ENSMUSG00000098949	Gm27160	Late
ENSMUSG00000080799	Gm15166	Late
ENSMUSG00000082440	Gm4914	Late
ENSMUSG00000103537	RP23-147E23.5	Late
ENSMUSG00000092300	Cdk3-ps	Late
ENSMUSG00000030276	Ttll3	Late
ENSMUSG00000103520	RP23-310L8.1	Late
ENSMUSG00000103668	RP23-314I1.1	Late
ENSMUSG00000033486	Catsper2	Late
ENSMUSG00000048440	Cyp4f16	Late
ENSMUSG00000017405	Nek8	Late
ENSMUSG00000085767	Gm13563	Late
ENSMUSG00000030882	Dnhd1	Late
ENSMUSG00000023952	Gtpbp2	Late
ENSMUSG00000002871	Tpra1	Late
ENSMUSG00000061046	Haghl	Late
ENSMUSG00000101615	Gm8495	Late
ENSMUSG00000099959	Gm29487	Late
ENSMUSG00000103265	RP23-34E15.3	Late
ENSMUSG00000042570	Mier2	Late
ENSMUSG00000100261	Gm6473	Late
ENSMUSG00000078151	Gm12226	Late
ENSMUSG00000099178	Gm8669	Late
ENSMUSG00000086926	Gm6226	Late
ENSMUSG00000099634	Gm29462	Late
ENSMUSG00000066116	Gm10154	Late
ENSMUSG00000093686	Gm4705	Late
ENSMUSG00000084129	Hmgb1-ps1	Late
ENSMUSG00000094215	Gm6489	Late
ENSMUSG00000094695	Gm21953	Late
ENSMUSG00000004187	Kifc2	Late
ENSMUSG00000081251	Gm12164	Late
ENSMUSG00000052482	Gm8174	Late
ENSMUSG00000089992	G6pd2	Late
ENSMUSG00000082006	Gm13649	Late
ENSMUSG00000043346	Gm6741	Late
ENSMUSG00000046636	Gm7729	Late
ENSMUSG00000083852	Gm13007	Late
ENSMUSG00000081071	Gm9836	Late
ENSMUSG00000097217	Gm26549	Late
ENSMUSG00000064063	BC048507	Late
ENSMUSG00000082865	Gm14745	Late
ENSMUSG00000082579	Gm11979	Late
ENSMUSG00000083700	Gm2986	Late
ENSMUSG00000084390	Gm15425	Late
ENSMUSG00000081244	Gm13529	Late
ENSMUSG00000087121	Gm7847	Late
ENSMUSG00000084334	Gm13494	Late
ENSMUSG00000095463	Entpd4	Late
ENSMUSG00000101687	Gm4854	Late
ENSMUSG00000102710	RP24-445C12.1	Late
ENSMUSG00000057160	Gm16372	Late
ENSMUSG00000062279	Gm10237	Late
ENSMUSG00000082693	Gm15190	Late
ENSMUSG00000099750	Gm18827	Late
ENSMUSG00000103034	UBC	Late
ENSMUSG00000082032	Gm12271	Late
ENSMUSG00000083859	Gm12003	Late
ENSMUSG00000081416	Gm14383	Late
ENSMUSG00000002020	Ltbp2	Late
ENSMUSG00000051890	Klhdc1	Late
ENSMUSG00000048559	4930555K19Rik	Late
ENSMUSG00000082093	Gm15928	Late
ENSMUSG00000082601	Gm12700	Late
ENSMUSG00000046341	Gm11223	Late
ENSMUSG00000081209	Gm14890	Late
ENSMUSG00000093688	Gm8488	Late
ENSMUSG00000083971	Gm5943	Late
ENSMUSG00000091020	Gm5828	Late
ENSMUSG00000099926	Gm6693	Late
ENSMUSG00000099385	Gm9540	Late
ENSMUSG00000080806	Gm13005	Late
ENSMUSG00000081670	Gm15697	Late
ENSMUSG00000060879	Gm6564	Late
ENSMUSG00000081745	Gm15549	Late
ENSMUSG00000081733	Gm12852	Late
ENSMUSG00000083019	Gm6222	Late
ENSMUSG00000066592	Gm7589	Late
ENSMUSG00000100744	Gm17764	Late
ENSMUSG00000082978	Rpsa-ps11	Late
ENSMUSG00000090467	Gm4613	Late
ENSMUSG00000082575	Gm13050	Late
ENSMUSG00000101784	Gm7553	Late
ENSMUSG00000046934	Csl	Late
ENSMUSG00000081231	Tcp1-ps1	Late
ENSMUSG00000103433	RP23-103B18.6	Late
ENSMUSG00000089877	Gm16102	Late
ENSMUSG00000084006	Gm14245	Late
ENSMUSG00000081120	Gm12458	Late
ENSMUSG00000093849	Gm7083	Late
ENSMUSG00000082861	Gm11362	Late
ENSMUSG00000072714	Rpl21-ps4	Late
ENSMUSG00000081740	Gm14279	Late
ENSMUSG00000084303	Gm8216	Late
ENSMUSG00000094092	Gm15921	Late
ENSMUSG00000078180	Gm20900	Late
ENSMUSG00000100351	Gm7867	Late
ENSMUSG00000062896	Rpl31-ps11	Late
ENSMUSG00000084183	Gm12009	Late
ENSMUSG00000060899	Rpl21-ps11	Late
ENSMUSG00000078291	Gm3940	Late
ENSMUSG00000081259	Gm6893	Late
ENSMUSG00000084208	Gm12792	Late
ENSMUSG00000081352	Gm12389	Late
ENSMUSG00000097900	Gm8652	Late
ENSMUSG00000083813	Gm15502	Late
ENSMUSG00000080836	Gm6444	Late
ENSMUSG00000081323	Rpl7l1-ps1	Late
ENSMUSG00000082115	Gm15490	Late
ENSMUSG00000084055	Gm12004	Late
ENSMUSG00000084115	Gm13566	Late
ENSMUSG00000093543	Gm8473	Late
ENSMUSG00000060128	Gm10075	Late
ENSMUSG00000083831	Gm14248	Late
ENSMUSG00000051133	Gm6293	Late
ENSMUSG00000081118	Gm6758	Late
ENSMUSG00000034437	Gm9761	Late
ENSMUSG00000095960	Gm13120	Late
ENSMUSG00000080242	Gm15487	Late
ENSMUSG00000095343	Gm6132	Late
ENSMUSG00000074826	Gm10767	Late
ENSMUSG00000085347	Hk1os	Late
ENSMUSG00000089736	Tgfbr3l	Late
ENSMUSG00000034163	Zfc3h1	Late
ENSMUSG00000035545	Leng8	Late
ENSMUSG00000082608	Gm7670	Late
ENSMUSG00000084799	Ino80dos	Late
ENSMUSG00000082709	Gm12362	Late
ENSMUSG00000082607	Gm12045	Late
ENSMUSG00000082920	Gm13864	Late
ENSMUSG00000085311	Gm15445	Late
ENSMUSG00000028248	Pnisr	Late
ENSMUSG00000072893	4933439C10Rik	Late
ENSMUSG00000081222	Gm15173	Late
ENSMUSG00000083377	Gm12653	Late
ENSMUSG00000081857	Gm13624	Late
ENSMUSG00000080715	Gm5406	Late
ENSMUSG00000081584	Gm12716	Late
ENSMUSG00000081888	Spcs2-ps	Late
ENSMUSG00000083906	Gm15186	Late
ENSMUSG00000081473	Gm4853	Late
ENSMUSG00000100551	Gm19503	Late
ENSMUSG00000082626	Rps13-ps5	Late
ENSMUSG00000083496	Gm11263	Late
ENSMUSG00000057223	Gm6578	Late
ENSMUSG00000097245	Gm5421	Late
ENSMUSG00000082650	Gm15358	Late
ENSMUSG00000094365	Gm21982	Late
ENSMUSG00000082873	Gm15367	Late
ENSMUSG00000085415	Gm12060	Late
ENSMUSG00000083721	Gm7700	Late
ENSMUSG00000074817	Papolb	Late
ENSMUSG00000043223	Gm4835	Late
ENSMUSG00000098210	Gm5224	Late
ENSMUSG00000023052	Npff	Late
ENSMUSG00000085442	Gm3362	Late
ENSMUSG00000081700	Gm14337	Late
ENSMUSG00000078193	Gm2000	Late
ENSMUSG00000081049	Rps24-ps3	Late
ENSMUSG00000083344	Gm7363	Late
ENSMUSG00000031312	Itgb1bp2	Late
ENSMUSG00000089788	Gm16586	Late
ENSMUSG00000055254	Ntrk2	Late
ENSMUSG00000019929	Dcn	Late
ENSMUSG00000022947	Cbr3	Late
ENSMUSG00000078125	Gm10916	Late
ENSMUSG00000099759	RP23-152O2.3	Late
ENSMUSG00000007655	Cav1	Late
[truncated: 8,834 more rows]

## Sheet: Curated Late program 
Aatk
Abca1
Abcc10
Abcg5
Abcg8
Abhd1
Acaa1b
Acadm
Acbd4
Acbd5
Acbd7
Ace2
Ackr3
Adamts14
Adck2
Adcy8
Adh1
Adig
Adrb1
Adtrp
Afap1l2
Agbl2
Agbl3
Ahnak
Aim1l
Aldh2
Aldh6a1
Aldoart1
Aldoart2
Aldoc
Amtn
Angptl6
Ankra2
Ankrd13d
Ankrd23
Ankrd35
Ankrd37
Antxr1
Anxa2
Anxa5
Arap1
Arhgap24
Arhgap4
Arhgap40
Arid5a
Arl4a
Arl6ip5
Armc7
Arpp21
Asap3
Atad3aos
Atg10
Atl3
Atp10b
Atp10d
Atp11a
Atp13a2
Atp5g2
Atp6v0c
Axl
B4galnt1
Bace2
Bcl11a
Bcl11b
Bcl6
Bcl7a
Bcl9l
Bfsp2
Bhlhe40
Bhlhe41
Bmp2
Bmp8a
Bmpr2
Btbd19
Btc
Btg1
C1qtnf4
C4a
Cacnb4
Cacng4
Calcoco1
Calhm2
Camk1d
Camk1g
Camk2d
Capn1
Car15
Catsper2
Cav1
Cbr3
Cbx4
Ccdc120
Ccdc142os
Ccdc17
Ccdc3
Ccser2
Cd109
Cd44
Cd82
Cd99l2
Cdc42ep5
Cebpb
Cecr6
Celf4
Cep83os
Cercam
Cfap44
Cfap69
Chd3
Chmp2b
Chrm2
Cib2
Cirbp
Cish
Clec2g
Clk1
Clstn2
Clstn3
Cltb
Cmpk2
Cobl
Col7a1
Commd3
Coq10a
Cox14
Cpne5
Cracr2a
Creb3l2
Crebl2
Crip3
Crlf2
Crybb3
Csad
Csf2ra
Csl
Cspg5
Ctsc
Ctso
Cx3cl1
Cyb5a
Cyp2j9
Cyp2r1
Cyp4f16
D1Pas1
Dalrd3
Dap
Dcaf6
Dcdc2b
Dcn
Dcp1b
Dct
Dctn1
Ddb2
Ddhd1
Ddit4
Dennd3
Dkk3
Dlx4
Dmd
Dmrt2
Dnajb2
Dnhd1
Doc2b
Dok2
Dok3
Dopey1
Dpp6
Dpy19l2
Dusp10
Dusp14
Dusp16
Dusp22
Ecel1
Echdc2
Eda
Ednrb
Efhd2
Efna3
Efs
Ehd2
Ehhadh
Eif4ebp3
Elf4
Emid1
Emp2
Enam
Enkur
Eno1b
Enox1
Entpd3
Entpd4
Eogt
Ephx2
Ephx3
Erdr1
Etohd2
Ets2
Eva1a
Ezh1
F2rl1
Fam120c
Fam124a
Fam132a
Fam154b
Fam174a
Fam177a
Fam214b
Fam221a
Fam227a
Fam25c
Fam46b
Fam98c
Fas
Fbrsl1
Fbxo25
Fbxo32
Fchsd1
Fgfbp3
Ficd
Fkbp1b
Flrt1
Fn3k
Fndc3b
Foxa1
Foxo3
Foxo6
Foxq1
Frk
Fst
Fstl3
Fuca1
Fut1
Fxyd2
Fxyd7
G6b
G6pd2
Gabrb3
Gad1
Gadd45b
Gclm
Gcnt1
Gdpd3
Gjd2
Glb1l2
Gng13
Gpm6b
Gpnmb
Gpr135
Gpr87
Grb14
Grhl1
Gria2
Grina
Grm8
Grp
Gss
Gtpbp2
H1f0
H2-T10
H2-T22
H6pd
Habp4
Haghl
Hcfc1r1
Hcn3
Hdac5
Hemk1
Heph
Hist1h1c
Hist1h2bc
Hist3h2a
Hivep3
Hk1os
Hlf
Hmgn3
Hn1
Hopx
Hs3st1
Hs3st5
Hsd17b2
Hsd3b7
Htr3a
Hypk
Idua
Ier3
Ifitm1
Ikbke
Il13ra1
Il17b
Il17d
Il17ra
Il1r1
Il1rap
Il22ra1
Ilvbl
Inafm1
Inf2
Ino80dos
Iqsec2
Irak4
Irf2
Irf2bp2
Irx1
Itgb1bp2
Itpr3
Izumo1
Izumo4
Jag1
Jakmip2
Jph4
Junb
Junos
Kat2b
Kcnc1
Kcnc4
Kcnip2
Kcnip3
Kcnip4
Kcnj2
Kcnma1
Kcnmb4
Kcnq4
Kcnv1
Kdsr
Kidins220
Kif16b
Kif26a
Kifc2
Kirrel2
Klf4
Klf6
Klhdc1
Klhl29
Klhl30
Kndc1
Krt10
Krt6a
Lamb2
Lancl3
Lenep
Leng8
Letm2
Lgals12
Lgals4
Lime1
Lin7b
Lmbrd1
Lmtk3
Lppr1
Lrp12
Lrrc29
Lrrc3
Lrrc9
Lrrn2
Lrsam1
Lsm7
Ltbp2
Ltbp4
Ly6d
Ly6g5b
Ly6h
Lypd1
Lypd2
Mal
Malat1
Mamld1
Man2c1
Map4k2
Mapt
Mbnl1
Metap1d
Mfap3l
Mfhas1
Mier2
Mir22hg
Mitf
Mlana
Mllt11
Mlph
Mmaa
Mocos
Moxd1
Mpst
Mpv17l
Mrpl23
Mtcp1
Mtcp1
Mtmr1
Mtss1
Muc15
Myd88
Myo1c
Myo1d
Myo6
Mzf1
Ncor2
Neat1
Necab3
Neil1
Nek8
Nfkb1
Nfkb2
Nfkbia
Nipa1
Nipal1
Nlgn1
Nme5
Nmrk1
Nog
Nov
Npff
Nr1d1
Nr4a1
Nr4a3
Nrep
Ntng1
Ntrk2
Ntrk3
Ntsr1
Nudt6
Nupr1l
Nxph3
Nyap1
Oat-rs1
Ocel1
Ogfod2
Oit1
Olfm1
Olfml2a
Oprd1
Orai2
Osbp
Osbpl5
Ostf1
Oxtr
P2rx2
P2rx4
Pabpc2
Palm2
Palm2Akap2
Pam16
Panct2
Papln
Papolb
Paqr7
Pcdhb16
Pcdhb17
Pcdhb19
Pcdhb20
Pcdhb21
Pcdhgb4
Pcmtd2
Pde9a
Peli3
Penk
Pex11a
Pfkfb4
Pfn2
Pfn4
Phf2os1
Pigp
Pigv
Pin1rt1
Pink1
Pitpnm2
Pknox1
Pla2g4b
Pld3
Plekhg5
Plekhn1
Plk3
Plk5
Plxna3
Plxnb2
Pmel
Pnck
Pnisr
Pnma2
Podxl2
Porcn
Ppapdc1b
Ppargc1a
Ppfia3
Ppfia4
Ppia
Ppm1j
Ppp1r13b
Ppp1r3b
Ppp2r3d
Ppp2r3d
Ppp2r3d
Prdx6b
Prima1
Prrg3
Psapl1
Psmb9
Ptgds
Pthlh
Ptk7
Ptpro
Ptprz1
Pxmp4
Rab29
Rab32
Rab3d
Rab40b
Ralyl
Ralyl
Ramp1
Rap2b
Rapgef4
Rasl2-9
Rbl2
Rbm3os
Rcan3
Rcsd1
Rdh12
Rdh14
Rdm1
Reep2
Reep3
Reep6
Relb
Rell2
Reps2
Rftn1
Rgs11
Rgs6
Rmdn1
Rnf103
Rnpepl1
Robo2
Rorb
Rpl37rt
Rps12l2
Rps13
Rps6
Rps6ka4
Rsrp1
Rtn4rl1
S100a14
Scai
Scaper
Sdk1
Sdr39u1
Selenbp1
Selo
Sema6d
Sepw1
Serpinb2
Serpinb8
Sertad3
Sgms2
Shank1
Siah3
Sil1
Ski
Slc12a5
Slc12a6
Slc1a4
Slc22a15
Slc24a5
Slc25a28
Slc25a40
Slc25a42
Slc26a11
Slc29a3
Slc2a13
Slc2a9
Slc35e4
Slc39a11
Slc39a2
Slc39a3
Slc3a2
Slc45a2
Slc48a1
Slc52a3
Slc5a9
Slc6a14
Slc7a3
Slc7a5
Slc9a9
Slitrk1
Smarca2
Smarcd2
Smim3
Smpdl3a
Smyd3
Snapin
Snhg7
Socs1
Socs5
Spats2l
Spns2
Srcin1
Ssbp2
St6galnac2
Stambp
Stard5
Stc1
Stk33
Ston1
Syne3
Szt2
Tagln
Tapbp
Tcf7l2
Tcp11
Tcta
Tecpr1
Tepp
Tex264
Tgfbr3l
Tgm3
Timp3
Tlr5
Tmbim1
Tmed3
Tmem170b
Tmem203
Tmem218
Tmem240
Tmem28
Tmem38b
Tmem40
Tmem42
Tmem9b
Tmprss11b
Tmub2
Tnfaip3
Tnfrsf18
Tnfrsf1a
Tnfrsf25
Tnip2
Tnni3
Tob2
Tpi-rs2
Tpra1
Tpt1
Trim34a
Trim63
TRPC2
Trpm4
Trpv4
Tsc22d4
Tspan10
Tstd1
Ttc22
Ttc6
Ttll3
Txlnb
Txnip
Tyr
UBC
Ube2nl
Uckl1
Ucn2
Unc45a
Upk2
Usp35
Vamp2
Vegfa
Vgll3
Vmac
Vsig10l
Wdr13
Wdr34
Whamm
Wisp1
Wnt9a
Yod1
Ypel3
Ypel5
Zak
Zbtb4
Zc3h6
Zcchc7
Zdhhc1
Zdhhc24
Zfc3h1
Zfp112
Zfp174
Zfp296
Zfp36
Zfp36l1
Zfp422-rs1
Zfp579
Zfp672
Zfp784
Zfr2
Zfyve21
Zfyve27
Zglp1
Zkscan14
Zkscan2
Znf512b
Zxdc

## Sheet: GO_Biological_Process_2018
Curated Late
Term	Overlap	P-value	Adjusted P-value	Old P-value	Old Adjusted P-value	Odds Ratio	Combined Score	Genes
regulation of cation channel activity (GO:2001257)	12/71	5.35434e-06	0.0273232	0	0	4.87775	59.2042	JPH4;NLGN1;CAMK2D;CACNB4;AHNAK;KCNIP2;FKBP1B;DMD;CAPN1;VAMP2;CACNG4;SHANK1
cytokine-mediated signaling pathway (GO:0019221)	43/633	2.21113e-05	0.0564169	0	0	1.96048	21.0152	OPRD1;IFITM1;CAMK2D;EDA;PELI3;LRRC3;IL1RAP;FOXO3;CSF2RA;CX3CL1;RPS6KA4;SOCS1;PTPRZ1;FLRT1;UBC;JUNB;IL13RA1;SOCS5;SERPINB2;ANXA2;CISH;IL1R1;TNFRSF18;IRAK4;NFKB1;DCN;PSMB9;TNFRSF1A;IL17RA;VEGFA;IL22RA1;NFKBIA;BCL6;RTN4RL1;TNIP2;IRF2;FAS;ACKR3;TNFRSF25;PPIA;MYD88;CD44;CRLF2
negative regulation of transcription from RNA polymerase II promoter (GO:0000122)	38/565	8.1276e-05	0.0829503	0	0	1.94103	18.2799	HDAC5;CEBPB;DLX4;BHLHE41;FOXO3;ZBTB4;ETS2;RELB;ZFP36;EDNRB;UBC;JUNB;IRX1;PLK3;TCF7L2;CBX4;BCL11A;FST;CAV1;NOG;ARID5A;MITF;NR1D1;KLF4;SMARCA2;NFKB1;NFKB2;VEGFA;NCOR2;SKI;DUSP22;BMP2;NR4A3;BCL6;BHLHE40;IRF2;MZF1;FRK
negative regulation of STAT cascade (GO:1904893)	8/41	6.92163e-05	0.0883026	0	0	5.63123	53.9374	SOCS1;CISH;RTN4RL1;CAV1;FLRT1;LRRC3;DCN;SOCS5
endothelial cell chemotaxis (GO:0035767)	4/9	0.000156666	0.0888294	0	0	12.8267	112.38	NR4A1;NOV;PLEKHG5;VEGFA
protein localization to membrane (GO:0072657)	16/160	0.000143643	0.0916266	0	0	2.886	25.5359	NLGN1;CAV1;KCNIP3;KCNIP4;RFTN1;EMP2;LIN7B;SYNE3;TNFRSF1A;RAB32;EHD2;DPP6;ZFYVE27;RAB40B;RAB29;RAMP1
positive regulation of neuron projection development (GO:0010976)	12/97	0.000131313	0.0957272	0	0	3.57031	31.9112	ROBO2;NTRK2;PLK5;CAMK1D;CPNE5;PTK7;SLITRK1;KIDINS220;PLXNB2;COBL;CX3CL1;PLXNA3
negative regulation of JAK-STAT cascade (GO:0046426)	8/47	0.000189703	0.0968056	0	0	4.91235	42.099	SOCS1;CISH;RTN4RL1;CAV1;FLRT1;LRRC3;DCN;SOCS5
cellular metal ion homeostasis (GO:0006875)	12/96	0.000118744	0.100992	0	0	3.6075	32.6066	TMEM203;EPHX2;CAV1;TRPV4;KCNMA1;STC1;TNNI3;ATP13A2;SLC24A5;KCNJ2;TPT1;LETM2
positive regulation of axonogenesis (GO:0050772)	7/37	0.000241778	0.112163	0	0	5.46001	45.4681	ROBO2;NTRK2;ZFYVE27;SLITRK1;PLXNB2;MAPT;PLXNA3
regulation of calcium ion transmembrane transporter activity (GO:1901019)	6/27	0.000268823	0.114317	0	0	6.41334	52.727	JPH4;CAMK2D;CACNB4;AHNAK;FKBP1B;DMD
regulation of calcium-mediated signaling (GO:0050848)	8/41	6.92163e-05	0.117737	0	0	5.63123	53.9374	JPH4;CAMK2D;P2RX4;P2RX2;FKBP1B;RCAN3;DMD;MAPT
positive regulation of fat cell differentiation (GO:0045600)	7/39	0.000340157	0.133525	0	0	5.18001	41.3681	CEBPB;ZFP36;BMP2;CREBL2;ZFP36L1;TRPM4;ADIG
regulation of vasoconstriction (GO:0019229)	6/29	0.000406689	0.138356	0	0	5.97104	46.6187	ACE2;OXTR;BMPR2;CAV1;KCNMB4;TRPM4
regulation of mitochondrial fission (GO:0090140)	5/19	0.000381956	0.139223	0	0	7.59474	59.7722	PINK1;INF2;DDHD1;MAPT;DCN
interleukin-1-mediated signaling pathway (GO:0070498)	11/95	0.000443534	0.14146	0	0	3.34169	25.8003	RPS6KA4;NFKBIA;IL1R1;TNIP2;PELI3;UBC;IL1RAP;IRAK4;NFKB1;MYD88;PSMB9
regulation of neuron projection development (GO:0010975)	12/119	0.000876807	0.186431	0	0	2.91026	20.4859	NTRK2;PLK5;CAMK1D;PTK7;RTN4RL1;KIDINS220;TRPV4;PTPRO;RAB29;PLXNB2;KNDC1;CX3CL1
regulation of peptidyl-serine phosphorylation (GO:0033135)	10/86	0.000771691	0.187521	0	0	3.35582	24.0509	OPRD1;PINK1;CAV1;NTRK3;DDIT4;CREBL2;DMD;CD44;PFN2;VEGFA
calcium ion homeostasis (GO:0055074)	10/87	0.000845395	0.187567	0	0	3.31724	23.4718	TMEM203;CAV1;EPHX2;TRPV4;CIB2;STC1;TNNI3;ATP13A2;SLC24A5;TPT1
calcium ion transport (GO:0006816)	12/118	0.000813434	0.18868	0	0	2.93492	20.8797	CRACR2A;CATSPER2;P2RX4;CAV1;TRPV4;ORAI2;SLC3A2;RAMP1;SLC24A5;CACNG4;TPT1;TRPM4
membrane raft assembly (GO:0001765)	3/6	0.000765968	0.195437	0	0	14.43	103.526	ANXA2;RFTN1;EMP2
negative regulation of sterol transport (GO:0032372)	3/6	0.000765968	0.205723	0	0	14.43	103.526	ABCG8;ABCG5;NFKB1
regulation of glomerular filtration (GO:0003093)	3/6	0.000765968	0.217152	0	0	14.43	103.526	PTPRO;F2RL1;EMP2
protein localization to cell periphery (GO:1990778)	12/117	0.00075393	0.226312	0	0	2.96	21.283	EHD2;DPP6;ZFYVE27;RAB40B;CAV1;KCNIP3;KCNIP4;RAB29;EMP2;LIN7B;RAMP1;TNFRSF1A
Pan Ect
Term	Overlap	P-value	Adjusted P-value	Odds Ratio	Combined Score	Genes
cell-substrate junction assembly (GO:0007044)	11/11	7.41448e-11	1.8918e-07	8.31947	194.052	COL17A1;CD151;LAMB3;ITGB4;LAMA3;KRT14;LAMC2;ITGA6;KRT5;LAMC1;PLEC
hemidesmosome assembly (GO:0031581)	11/11	7.41448e-11	3.78361e-07	8.31947	194.052	COL17A1;CD151;LAMB3;ITGB4;LAMA3;KRT14;LAMC2;ITGA6;KRT5;LAMC1;PLEC
bicellular tight junction assembly (GO:0070830)	15/28	1.21928e-07	0.000207399	4.45686	70.9524	PRKCI;PARD6G;F11R;MPP5;CLDN1;GRHL2;MPP7;PARD6B;OCLN;MARVELD2;POF1B;APC;PARD3;MARVELD3;CRB3
regulation of cell migration (GO:0030334)	69/316	5.17484e-07	0.000528144	1.81659	26.2939	PTPRU;ZMYND8;SERPINE1;LAMC2;PTPRK;FGF1;AMOT;CXCL16;SLK;FAM110C;DAG1;CTSH;CPNE3;PLXNC1;HRAS;ANXA1;IGFBP5;LMO4;DDX58;MINK1;ACTN4;TIAM1;CDH13;SGK3;ITGA6;EPHA1;BEX4;GRB7;KANK1;NOTCH1;CD151;SEMA3C;SRC;SEMA3D;SEMA3A;SEMA3B;PDGFA;PRKX;SEMA3E;PRR5L;SEMA3F;EGFR;FAM83H;PAK1;PARD6B;PODXL;PDGFD;PDGFC;PDPN;PLXNA2;PTK2B;RFFL;SEMA4A;ACE;SEMA4D;SEMA4B;LAMB1;SEMA4G;SORL1;CAMSAP3;APC;KRT16;STK26;SPRY2;AMOTL2;PLXNB…
epidermis development (GO:0008544)	27/81	4.14315e-07	0.000528562	2.77316	40.7561	COL17A1;BNC1;LAMA3;KLK5;LAMC2;ATP2C1;EVPL;DLL1;CASP14;SCEL;KRTDAP;DSP;WNT10A;LAMB3;EMP1;GRHL3;KRT5;GRHL2;FOXN1;KRT9;EDAR;KRT17;FABP5;KRT16;KRT15;KRT14;FGFR2
negative regulation of axon extension involved in axon guidance (GO:0048843)	10/15	1.04621e-06	0.000889805	5.54631	76.3746	SEMA4A;SEMA4D;SEMA3C;SEMA3D;SEMA4B;SEMA3A;SEMA3B;SEMA3E;SEMA3F;SEMA4G
ameboidal-type cell migration (GO:0001667)	17/40	1.24284e-06	0.000906032	3.53577	48.0798	TBX1;SEMA4A;SEMA3C;SEMA4D;SEMA3D;SEMA3A;SEMA4B;SEMA3B;SEMA3E;SEMA3F;SEMA4G;AMOT;SGPL1;FAT2;NRTN;AMOTL2;AMOTL1
negative chemotaxis (GO:0050919)	13/26	2.40559e-06	0.00153447	4.15973	53.8175	SEMA5B;SEMA4A;SEMA3C;SEMA4D;SEMA3D;SEMA3A;SEMA4B;SEMA3B;PDGFA;SEMA3E;SEMA3F;SEMA4G;ITGAV
regulation of axon extension involved in axon guidance (GO:0048841)	12/23	3.32857e-06	0.00169857	4.34059	54.7477	SEMA4A;SEMA4D;SEMA3C;DSCAM;SEMA3D;SEMA4B;SEMA3A;SEMA3B;PLXNA2;SEMA3E;SEMA3F;SEMA4G
cell-cell junction assembly (GO:0007043)	25/79	3.2322e-06	0.00183266	2.63274	33.284	CNTNAP1;PARD6G;F11R;CLDN1;PARD6B;CDH3;POF1B;MARVELD2;CDH1;MARVELD3;PRKCI;JUP;MPP5;GRHL2;MPP7;OCLN;GJB2;APC;PARD3;PKP2;CDH13;CD9;PKP4;PKP3;CRB3
apical junction assembly (GO:0043297)	15/35	4.63566e-06	0.00215053	3.56549	43.7903	PRKCI;PARD6G;F11R;MPP5;CLDN1;GRHL2;MPP7;PARD6B;OCLN;MARVELD2;POF1B;APC;PARD3;MARVELD3;CRB3
negative regulation of axon guidance (GO:1902668)	10/17	5.3879e-06	0.0022912	4.8938	59.3685	SEMA4A;SEMA4D;SEMA3C;SEMA3D;SEMA4B;SEMA3A;SEMA3B;SEMA3E;SEMA3F;SEMA4G
skin development (GO:0043588)	27/94	1.0261e-05	0.00402783	2.38963	27.4501	ERRFI1;ASCL4;ITGB4;PDGFA;ALOX12;CLDN1;EVPL;DLL1;TGM1;SCEL;DACT2;SFN;DSP;CERS3;WNT10A;ST14;ANXA1;ITGA3;KDF1;ASPRV1;KRT9;CLDN4;KRT16;TMEM79;ITGA6;MET;EPHA2
semaphorin-plexin signaling pathway (GO:0071526)	13/29	1.10636e-05	0.00403269	3.72942	42.5595	SEMA4A;SEMA3C;SEMA4D;SEMA3D;SEMA3A;SEMA4B;SEMA3B;SEMA3E;SEMA3F;SEMA4G;PLXNA2;PLXNB1;MET
cardiac muscle cell-cardiac muscle cell adhesion (GO:0086042)	6/7	1.88366e-05	0.0064082	7.13097	77.5829	DSP;CXADR;JUP;PKP2;DSG2;DSC2
negative regulation of axon extension (GO:0030517)	11/23	2.50281e-05	0.0079824	3.97888	42.1582	SEMA4A;SEMA4D;SEMA3C;SEMA3D;SEMA4B;SEMA3A;SEMA3B;SEMA3E;RNF6;SEMA3F;SEMA4G
neural crest cell migration (GO:0001755)	12/28	4.19711e-05	0.0125987	3.56549	35.9349	TBX1;SEMA4A;SEMA3C;SEMA4D;SEMA3D;SEMA3A;SEMA4B;SEMA3B;SEMA3E;NRTN;SEMA3F;SEMA4G
regulation of GTPase activity (GO:0043087)	42/188	4.70324e-05	0.0133337	1.8586	18.5204	ARHGAP8;RABGAP1;DOCK9;DOCK8;RASGRF1;FZD10;F11R;FGD2;SYDE2;FGD3;ARHGAP21;FGD4;FGD6;ERBB2;PLXNA2;SH3BP4;PLXNC1;HRAS;S100A10;PROM2;VAV3;RALBP1;CDKL5;ARHGEF37;SEMA4D;CAV2;ODAM;ARHGAP27;ARHGAP23;VAV2;TBC1D2;LRCH1;DNMBP;SGSM2;PKP4;PLXNB1;ITGA6;GNB5;EPHA1;AGRN;CPEB2;ARHGEF5
positive regulation of cell motility (GO:2000147)	40/179	6.99467e-05	0.0178469	1.8591	17.7874	GRB7;NOTCH1;CD151;SEMA3C;SEMA3D;SEMA3A;SEMA3B;PDGFA;LAMC2;SEMA3E;SEMA3F;FGF1;EGFR;CXCL16;FAM83H;PAK1;PODXL;FAM110C;PDGFD;SPOCK2;PDGFC;PDPN;CTSH;PTK2B;CPNE3;HRAS;SEMA4A;SEMA4D;SEMA4B;LAMB1;ACTN4;SEMA4G;TIAM1;APC;CDH13;SPRY2;ITGA6;EPHA1;LGR6;TRIM32
desmosome organization (GO:0002934)	6/8	6.76195e-05	0.0181612	6.2396	59.9102	DSP;JUP;PERP;PKP2;DSG2;PKP3
bundle of His cell-Purkinje myocyte adhesion involved in cell communication (GO:0086073)	5/6	0.000134995	0.0313126	6.93289	61.774	DSP;JUP;PKP2;DSG2;DSC2
positive regulation of cell migration (GO:0030335)	46/221	0.000129701	0.0315174	1.73165	15.4988	GRB7;NOTCH1;CD151;SEMA3C;SRC;SEMA3D;SEMA3A;SEMA3B;PDGFA;LAMC2;SEMA3E;SEMA3F;FGF1;ACVR1B;EGFR;HDAC6;CXCL16;FAM83H;PAK1;RAB25;HYAL1;PODXL;FAM110C;PDGFD;PDGFC;PDPN;CTSH;PTK2B;CPNE3;RREB1;HRAS;SEMA4A;SEMA4D;SEMA4B;GAB1;LAMB1;ACTN4;SEMA4G;TIAM1;APC;CDH13;SPRY2;ITGA6;EPHA1;LGR6;TRIM32
epithelial cell development (GO:0002064)	8/16	0.000226546	0.0462425	4.15973	34.9108	RAB25;POF1B;WNT7B;TMEM79;DACT2;WNT7A;SIPA1L3;GRHL2
establishment of skin barrier (GO:0061436)	8/16	0.000226546	0.0481693	4.15973	34.9108	CLDN4;KRT16;KDF1;TMEM79;ALOX12;SFN;CLDN1;MET
regulation of water loss via skin (GO:0033561)	8/16	0.000226546	0.0502636	4.15973	34.9108	CLDN4;KRT16;KDF1;TMEM79;ALOX12;SFN;CLDN1;MET
generation of neurons (GO:0048699)	30/130	0.000298047	0.0584975	1.91988	15.5861	RB1;SEMA3A;PCSK9;FZD10;ASCL2;DLL1;ARNTL;NRBP2;WNT6;CDH1;IER2;WNT3;MARK1;WNT4;WNT10B;FZD3;WNT10A;CDKL5;FZD5;WNT3A;RYK;WNT7B;WNT9B;WNT7A;PROX1;CDK6;ID1;ID4;CTNNB1;LMX1B
cytoskeleton organization (GO:0007010)	29/126	0.000390514	0.0738072	1.9148	15.0274	LAMA5;CNTNAP1;MAST4;NEDD9;SIPA1L3;FGD2;FGD3;FGD4;FGD6;DAG1;PAK6;PTK2B;APOE;MARK1;SH3D19;PRKCI;SUN1;JUP;DST;MICAL2;ANK3;KRT76;ARC;KRT16;WDPCP;TNIK;RHOV;EZR;AJUBA
epithelial cell morphogenesis (GO:0003382)	6/10	0.000408798	0.0745034	4.99168	38.9465	RAB25;POF1B;DACT2;MET;SIPA1L3;GRHL2
negative regulation of glial cell apoptotic process (GO:0034351)	5/7	0.000425393	0.0748545	5.94248	46.1285	PRKCI;PRKCH;PRKCD;GAS6;DLL1
neural crest cell development (GO:0014032)	12/35	0.000514167	0.0819936	2.85239	21.601	TBX1;SEMA4A;SEMA3C;SEMA4D;SEMA3D;SEMA3A;SEMA4B;SEMA3B;SEMA3E;NRTN;SEMA3F;SEMA4G
positive regulation of JNK cascade (GO:0046330)	20/76	0.000499238	0.0821811	2.18933	16.6442	APP;UNC5CL;SEMA3A;WNT7B;TNFRSF19;MINK1;WNT7A;FZD10;TNF;GADD45G;PYCARD;EDAR;PAK1;TRAF6;TAOK1;PTK2B;HRAS;ARHGEF5;ANKRD6;MAP3K5
glycerophospholipid biosynthetic process (GO:0046474)	35/164	0.000483252	0.0822012	1.7755	13.5559	CDS1;ARF3;SLC27A1;SLC44A1;SLC44A2;DGKA;CPNE6;LCAT;PIK3C2G;PIK3R1;PIK3CB;PLD1;PIK3C2A;AGPAT3;MTMR7;PIK3R5;MTM1;ACP6;INPP5K;CPNE3;PIP4K2C;PLA2G2F;PCYT1B;PLEKHA1;STARD10;PLA2G4A;SYNJ2;PTPN13;PIKFYVE;ETNK2;LPCAT4;PITPNM3;GPD1L;LPIN1;LPIN3
intermediate filament organization (GO:0045109)	7/14	0.000570972	0.0882931	4.15973	31.0656	DSP;KRT14;PKP2;PKP1;KLHL24;KRT9;MTM1
epithelial cell-cell adhesion (GO:0090136)	6/11	0.000807798	0.121241	4.53789	32.3152	CAMSAP3;JUP;ITGB5;KIT;KIFC3;PLEKHA7
regulation of sodium ion transmembrane transporter activity (GO:2000649)	12/37	0.000907627	0.132332	2.69821	18.9001	SLC9A3R1;FXYD3;WNK2;NEDD4L;PCSK9;GLRX;ANK3;GPD1L;UTRN;SCN4B;SCN2B;PTPN3
filopodium assembly (GO:0046847)	7/15	0.000959786	0.132373	3.88242	26.9782	FGD3;FGD4;FGD6;ARHGEF4;EZR;VSTM5;FGD2
morphogenesis of an epithelium (GO:0002009)	8/19	0.000953728	0.135191	3.50293	24.3634	WNT10A;KRT16;KDF1;RIPK4;PRKX;MPP5;LIN7C;FGFR2
Late Mes
Term	Overlap	P-value	Adjusted P-value	Odds Ratio	Combined Score	Genes
extracellular matrix organization (GO:0030198)	74/229	1.97663e-18	1.00867e-14	2.95109	120.302	ITGB1;SPARC;COL16A1;COL14A1;LAMC3;ELN;NCAN;COL12A1;ITGA2B;TNC;LOXL3;FGF2;CTSS;LOXL1;LOXL2;ADAMTS5;SH3PXD2A;IBSP;CTSK;SH3PXD2B;TIMP2;CAPN2;MADCAM1;CSGALNACT1;POSTN;MMP2;BGN;MMP9;GREM1;MMP11;MMP14;VCAN;MMP16;ADAM15;LOX;OPTC;COL6A2;PXDN;COL6A1;COL8A2;MATN1;COL8A1;COL6A3;MATN4;LAMA2;COL11A1;COL11A2;NOXO1;NDNF;NID2;THBS1;FBLN5;ACAN;SERPINH1;HAS2;JAM2;TGFB1;VCAM1;LUM;CMA1;FN1;COL1A1;COL3A1;COL1A2;BMP1;…
nervous system development (GO:0007399)	112/455	6.48585e-17	1.65486e-13	2.24798	83.7919	SEMA5A;SH3GL3;NAB2;FGF2;CDH2;OPHN1;DPYSL2;DPF1;SOX8;CSGALNACT1;MYLIP;RBFOX1;MEF2C;RBFOX2;SEMA6A;APLP1;POU3F3;BTD;NBL1;NOTCH2;NUMBL;FUT10;SHOX2;EFNA5;PCDH18;EFNB3;FLRT3;BTBD3;PCDHA4;NDP;PCDHA9;TGFB1;CNTN6;ST8SIA2;FZD9;INHBA;DCLK1;PCDHGA10;ABTB2;MAFB;DLG2;PCDHB2;DLG4;PCDHB6;PCDHB5;PCDHB4;PCDHB3;FAT4;CNTN4;SIM1;FGFR4;FGF13;PCDHB9;ITM2A;PCDHB8;SDK2;PCDHB7;FGFR1;PCDHGB7;DAGLA;PCDHGB6;PCDHGB5;NCAN;PCDH…
glycosaminoglycan biosynthetic process (GO:0006024)	35/99	1.12266e-10	1.90964e-07	3.22863	73.9685	SDC2;NCAN;HEXA;XYLT2;PRELP;ACAN;DSEL;GPC2;HAS2;CHSY3;CHST14;GPC6;CSGALNACT1;HS3ST3B1;GALNT5;ANGPT1;CHPF2;LUM;GLCE;ABCC5;CSGALNACT2;OMD;B3GAT1;BGN;KERA;HS3ST6;UGDH;VCAN;OGN;B3GNT3;CHST1;PXYLP1;CSPG4;CHST2;CHST3
skeletal system development (GO:0001501)	43/146	7.32571e-10	9.34577e-07	2.68969	56.5761	PTGER4;NCAN;COL12A1;SHOX2;COL11A2;IHH;CHRD;PRELP;AEBP1;PTH1R;PCSK5;PKD1;GLI2;ACAN;TRPS1;SH3PXD2B;PLS3;ALX4;CMKLR1;VKORC1;GDF10;POSTN;WNT5A;EN1;TBX4;BMP6;TBX3;PAX1;RAB33B;SULF2;COL1A1;BMP3;VCAN;COL1A2;BMP1;EVC;CDH11;ALPL;TLL1;COL9A2;HOXD3;FGFR1;FBN1
axonogenesis (GO:0007409)	55/223	4.8966e-09	4.99747e-06	2.25239	43.0989	RET;NRP1;DRAXIN;SH3KBP1;PIK3CD;VLDLR;GLI2;ROBO1;OPHN1;KIF5A;SCN1B;EPHB3;EPHA5;SEMA6A;OMD;WNT5A;PRKCA;KERA;GAB2;GFRA3;GFRA2;GFRA4;SLC9A6;DOK6;ULK2;SHANK3;NLGN3;PRELP;EFNA5;LRRC55;RAP1GAP;NTN3;EFNB1;RELN;EFNB3;SLITRK3;SLITRK6;SLIT3;NCAM1;FYN;CTNNA2;SLIT2;LINGO1;AUTS2;LUM;SIAH2;SEMA4F;S100B;GP5;LRFN3;LRFN5;CXCL12;OGN;LRRN1;CNTN4
collagen fibril organization (GO:0030199)	15/29	6.45288e-08	5.48818e-05	4.72367	78.2057	COL14A1;LUM;COL11A1;COL12A1;COL11A2;LOXL1;LOXL2;COL1A1;GREM1;COL3A1;COL1A2;COL5A1;LOX;COL5A2;SERPINH1
sulfur compound catabolic process (GO:0044273)	16/35	2.13658e-07	0.000155757	4.17482	64.1206	LUM;NCAN;HEXA;OMD;BGN;PRELP;KERA;ACAT1;ACAN;VCAN;OGN;IDS;CHAC2;CSPG4;HPSE;ARSB
chondroitin sulfate metabolic process (GO:0030204)	14/30	9.04781e-07	0.000461709	4.2618	59.3053	CSGALNACT1;CHPF2;NCAN;HEXA;CSGALNACT2;B3GAT1;BGN;NDNF;VCAN;IDS;CHSY3;CSPG4;ARSB;CHST3
axon guidance (GO:0007411)	39/158	7.88931e-07	0.00050324	2.2542	31.6774	RET;NRP1;DRAXIN;SH3KBP1;PTPRM;PIK3CD;VLDLR;EFNA5;RAP1GAP;GLI2;ROBO1;NTN3;EFNB1;ALCAM;EFNB3;RELN;OPHN1;KIF5A;SLIT3;NCAM1;FYN;SLIT2;SCN1B;EPHB3;EPHA5;SEMA6A;SIAH2;WNT5A;PRKCA;SEMA4F;GAB2;GFRA3;GFRA2;GFRA4;CXCL12;NFIB;DOK6;CNTN4;SHANK3
glycosaminoglycan catabolic process (GO:0006027)	20/56	8.92264e-07	0.000505914	3.26158	45.4322	HGSNAT;TGFB1;LUM;NCAN;SDC2;HEXA;OMD;BGN;KERA;PRELP;FGF2;ACAN;VCAN;OGN;IDS;GPC2;CSPG4;HPSE;GPC6;ARSB
chondroitin sulfate proteoglycan biosynthetic process (GO:0050650)	12/25	3.81291e-06	0.00176884	4.38356	54.6942	CSGALNACT1;VCAN;CHPF2;NCAN;CSGALNACT2;B3GAT1;XYLT2;BGN;PXYLP1;CHSY3;CSPG4;CHST3
sulfur compound biosynthetic process (GO:0044272)	31/122	5.43358e-06	0.00231063	2.32053	28.1316	SLC26A1;NCAN;XYLT2;PRELP;OPLAH;ACAN;DSEL;NDST3;CHAC2;CHSY3;CHST14;CSGALNACT1;HS3ST3B1;ANGPT1;CHPF2;LUM;GLCE;CSGALNACT2;OMD;B3GAT1;BGN;KERA;VCAN;OGN;B3GNT3;CHST1;PXYLP1;CSPG4;CDO1;CHST2;CHST3
STAT cascade (GO:0097696)	11/22	5.90663e-06	0.00231858	4.56621	54.9746	STAT5A;IFNAR2;STAT5B;STAT1;STAT2;CLCF1;STAT3;CCL2;PKD2;JAK2;PKD1
modulation of chemical synaptic transmission (GO:0050804)	23/82	1.5429e-05	0.00524896	2.56153	28.3799	NLGN3;MEF2C;PXK;NLGN2;GRID1;LRRK2;GRIK5;GRIK3;GRIK4;GRIK1;ATP1A2;CPLX2;RIMS1;STX1B;RELN;CDH2;GRM7;OPHN1;SLC6A9;DLG4;NTF3;GRIA3;GRIA4
calcium-dependent cell-cell adhesion via plasma membrane cell adhesion molecules (GO:0016339)	15/41	1.46845e-05	0.0053525	3.34113	37.1825	PCDHB10;CDH7;CDH4;CDH2;PCDHB2;CDH20;CDH10;CDH11;CDH12;PCDHB6;PCDHB5;PCDHB4;PCDHB3;PCDHB9;CDH18
central nervous system development (GO:0007417)	45/217	1.7788e-05	0.00567327	1.89382	20.7127	SH3GL3;RARG;THRA;NCAN;ADAM22;LOXL3;GRIK1;PKD2;PCDH18;PKD1;ACAN;SRR;RELN;ATXN1;CDH2;ADAM23;SPOCK1;SOX8;APOD;FYN;CIC;ARNT2;EPHA7;SLC6A17;CNTN6;STAT3;SMARCA1;S100B;EML1;SOX10;DCLK1;POU3F3;SHROOM4;GRIN2D;POU6F1;TGFBR2;SLC8A3;NR4A2;VCAN;BTD;PITPNM1;AGTR2;CNTN4;FGFR4;FGFR1
cell-cell adhesion via plasma-membrane adhesion molecules (GO:0098742)	33/142	2.09423e-05	0.00628637	2.12232	22.8654	ITGB1;PTPRM;PKD1;CDH7;ROBO1;CDH4;ALCAM;CDH2;FLRT3;CDH20;MPZ;SCARF2;ACVR1;CADM3;VCAM1;CADM2;UNC5D;PCDHB10;TGFBR2;PTPRD;PCDHB2;CDH10;CDH11;PCDHB6;CDH12;PCDHB5;PCDHB4;PCDHB3;FAT4;PCDHB9;CD200;SDK2;CDH18
synapse assembly (GO:0007416)	19/63	2.74087e-05	0.00777038	2.75422	28.9321	NLGN3;NLGN2;WNT5A;PCDHB10;DNM3;CDH2;PCDHB2;FLRT3;SLITRK6;PCDHB6;PCDHB5;PCDHB4;PCDHB3;SHANK3;PCDHB9;SHANK2;PCDHB8;SDK2;PCDHB7
regulation of pathway-restricted SMAD protein phosphorylation (GO:0060393)	18/59	3.72975e-05	0.0100173	2.78616	28.4093	ACVR1;GDF10;LEFTY1;TGFB1;TGFB3;HFE;LDLRAD4;INHBA;SMAD6;DKK1;GDF5;BMP6;GDF7;GREM1;BMP3;DAB2;BMPER;PMEPA1
protein complex subunit organization (GO:0071822)	15/45	5.22224e-05	0.0133245	3.04414	30.0152	COL14A1;LUM;COL11A1;COL12A1;COL11A2;LOXL1;LOXL2;COL1A1;GREM1;COL3A1;COL1A2;COL5A1;LOX;COL5A2;SERPINH1
glycosaminoglycan metabolic process (GO:0030203)	18/61	6.10262e-05	0.0148294	2.69481	26.151	HS3ST3B1;HGSNAT;GALNT5;NCAN;SDC2;HEXA;B3GAT1;XYLT2;BGN;HS3ST6;UGDH;VCAN;IDS;PXYLP1;GPC2;CSPG4;HPSE;GPC6
dermatan sulfate proteoglycan biosynthetic process (GO:0050651)	8/15	6.45592e-05	0.0149748	4.87062	46.9914	CSGALNACT1;VCAN;NCAN;DSEL;CSGALNACT2;BGN;CSPG4;CHST14
extracellular matrix disassembly (GO:0022617)	21/78	6.9103e-05	0.0153319	2.45873	23.5544	CMA1;ELN;MMP2;FN1;NOXO1;MMP9;CTSS;ADAMTS5;MMP11;ACAN;MMP14;BMP1;MMP16;ADAM15;OPTC;CTSK;SH3PXD2B;TIMP2;CAPN2;TLL1;FBN1
keratan sulfate catabolic process (GO:0042340)	7/12	8.98675e-05	0.0183438	5.32725	49.6349	ACAN;LUM;HEXA;OMD;OGN;PRELP;KERA
positive regulation of ossification (GO:0045778)	16/52	8.88701e-05	0.018896	2.80998	26.2124	ACVR1;OSR2;MEF2C;ZHX3;TGFB1;TGFB3;OSR1;WNT5A;FZD9;ISG15;ATRAID;CYR61;SLC8A1;RUNX2;BMP6;IL6ST
cGMP metabolic process (GO:0046068)	11/28	9.63019e-05	0.0189011	3.58774	33.1795	GUCY1A3;GUCY1B3;ADCY9;PDE1B;NPR2;PDE2A;ADCY4;ADCY3;ADCY2;ADCY5;AQP1
chondroitin sulfate biosynthetic process (GO:0030206)	9/20	0.000120977	0.0220481	4.10959	37.0681	CSGALNACT1;VCAN;CHPF2;NCAN;CSGALNACT2;BGN;CHSY3;CSPG4;CHST3
cAMP-mediated signaling (GO:0019933)	20/75	0.000117853	0.0222742	2.43531	22.03	EPHA5;PTGER4;PTGFR;PTGIR;CALCA;KSR1;PTGER1;PTGER2;PTGER3;PDE2A;ADCY4;ADCY3;ADCY2;PTH1R;ADCY5;MC4R;ADCYAP1;ADCY9;MC5R;PDE3A
sprouting angiogenesis (GO:0002040)	14/44	0.000162643	0.0286195	2.90577	25.3498	SEMA5A;NRP1;FLT1;ANGPT1;THBS1;FGF2;LOXL2;ROBO1;GREM1;BMPER;RSPO3;ITGB1BP1;SLIT2;EPHB4
muscle organ development (GO:0007517)	17/60	0.000168556	0.0286714	2.58752	22.481	CHODL;MEF2C;LAMA2;NEB;AEBP1;CACNA1H;POU6F1;SGCE;MRAS;MYH3;EVC;ITGA11;COL6A3;MKX;MEF2D;SGCG;HBEGF
chondroitin sulfate catabolic process (GO:0030207)	7/13	0.000176269	0.0290161	4.91746	42.504	VCAN;NCAN;HEXA;BGN;IDS;CSPG4;ARSB
embryonic skeletal system development (GO:0048706)	9/21	0.000191186	0.0304882	3.91389	33.5118	COL1A1;OSR2;WDR60;OSR1;WNT5A;FUZ;HOXD3;PCSK5;SULF2
negative regulation of protein phosphorylation (GO:0001933)	36/178	0.000198364	0.0306743	1.84701	15.7465	RTN4R;LRRC15;PID1;LRRK2;MVP;FBLN1;LDLRAD4;THY1;PPM1E;PREX1;RASSF2;DEPTOR;LRRTM3;FLRT3;LRRTM4;CHAD;NTF3;PMEPA1;SLIT2;LRRC4B;WWTR1;PRNP;TGFB1;DUSP3;IGFBP3;BGN;RTN4RL2;GP1BA;SMAD6;DKK1;SIRT2;ASPN;GREM1;SFRP2;MYADM;ITGB1BP1
regulation of synaptic transmission, glutamatergic (GO:0051966)	14/45	0.00021251	0.0318953	2.8412	24.0266	NLGN3;MEF2C;NLGN2;TSHZ3;LRRK2;GRIK3;ATP1A2;GRIK1;RELN;GRM7;CDH2;OPHN1;SHANK3;SHANK2
cell-matrix adhesion (GO:0007160)	22/90	0.000219903	0.0320619	2.23237	18.8017	ITGB1;CD63;VCAM1;TESK2;THY1;ADAMTS12;PKD1;FBLN5;THBS3;SGCE;COL3A1;ADAM15;PARVG;ITGA10;TRIP6;ITGA11;MADCAM1;ITGB1BP1;HPSE;HOXD3;PPFIA2;TMEM8B
positive regulation of bone mineralization (GO:0030501)	11/31	0.000278275	0.0364112	3.24054	26.53	ACVR1;OSR2;MEF2C;TGFB1;TGFB3;OSR1;FZD9;ISG15;ATRAID;SLC8A1;BMP6
skeletal system morphogenesis (GO:0048705)	11/31	0.000278275	0.0373694	3.24054	26.53	OSR2;SFRP4;RARG;CYP26B1;WDR60;FUZ;HOXD3;TBX4;IFITM5;RAB33B;FGFR1
cartilage development (GO:0051216)	14/46	0.000274989	0.0379262	2.77943	22.7879	OSR2;MEF2C;WNT2B;TGFB1;OSR1;COL11A2;PKD1;FGF2;GDF5;RUNX3;RUNX2;SULF2;NFIB;HOXD3
chondroitin sulfate proteoglycan metabolic process (GO:0050654)	5/7	0.00027208	0.0385674	6.52316	53.5513	CSGALNACT1;CSGALNACT2;B3GAT1;XYLT2;PXYLP1
heart development (GO:0007507)	31/149	0.000317854	0.0405502	1.90003	15.3027	RARG;SHOX2;GATA6;CACNA1C;PKD2;PCSK5;PKD1;HDAC9;CRIP1;GLI2;GJA1;T;SOX18;FLRT3;SH3PXD2B;MEF2D;EPHB4;SGCG;MEF2C;LEFTY1;TGFB1;OSR1;TBX5;POU6F1;TGFBR2;TGFBR3;COL3A1;HAND2;ZFPM2;DAND5;FBN1
neuron projection morphogenesis (GO:0048812)	33/163	0.000351021	0.0436893	1.84889	14.7073	NRK;SDC2;LRRK2;PRELP;LRRC55;DOCK10;ALCAM;FLRT3;BTBD3;NTF3;SLITRK3;SLITRK6;SLIT3;SLIT2;CTNNA2;EPHB3;LINGO1;LUM;OMD;KERA;S100B;GP5;DCLK1;LRFN3;LRFN5;SLC9A6;DLG4;OGN;LRRN1;CNTN4;NBL1;SHANK3;SHANK2
cellular response to BMP stimulus (GO:0071773)	21/87	0.00036416	0.0442454	2.20438	17.4541	ACVR1;GDF10;LEFTY1;TGFB1;TGFB3;HFE;SMAD9;ADAMTS12;SMAD6;FSTL1;GDF5;RUNX2;BMP6;RGMA;GDF7;TMEM100;TGFBR3;GREM2;BMP3;VSTM2A;ADAMTS7
homophilic cell adhesion via plasma membrane adhesion molecules (GO:0007156)	17/64	0.000392518	0.0465819	2.4258	19.0254	ITGB1;CADM3;CADM2;PTPRM;PKD1;CDH7;ROBO1;CDH4;CDH2;CDH20;CDH10;CDH11;CDH12;PCDHB6;CDH18;CD200;SDK2
positive regulation of biomineral tissue development (GO:0070169)	11/33	0.000517296	0.0538727	3.04414	23.0347	ACVR1;OSR2;MEF2C;TGFB1;TGFB3;OSR1;FZD9;ISG15;ATRAID;SLC8A1;BMP6
negative regulation of transmembrane receptor protein serine/threonine kinase signaling pathway (GO:0090101)	19/77	0.000507423	0.0539454	2.25345	17.0951	ACVR1;TGFB1;TGFB1I1;WFIKKN2;MAGI2;HTRA4;CHRD;CIDEA;LDLRAD4;SMAD6;DKK1;ASPN;TGFBR2;GREM1;EID2;BMPER;PMEPA1;NBL1;DAND5
positive regulation of excitatory postsynaptic potential (GO:2000463)	8/19	0.000506708	0.0550156	3.84523	29.176	NLGN3;RIMS1;STX1B;NLGN2;RELN;DLG4;SHANK3;SHANK2
cyclic nucleotide biosynthetic process (GO:0009190)	8/19	0.000506708	0.0562116	3.84523	29.176	GUCY1A3;GUCY1B3;ADCY9;NPR2;ADCY4;ADCY3;ADCY2;ADCY5
regulation of cell communication (GO:0010646)	18/71	0.000497384	0.0564033	2.31526	17.6102	TSPYL2;NLGN3;RYR2;PXK;NLGN2;GRID1;GRIK5;GRIK3;GRIK4;GRIK1;SLC8A1;RELN;NTF3;CASQ2;SASH1;GRIA3;BIRC3;GRIA4
regulation of receptor internalization (GO:0002090)	10/28	0.000495436	0.0574593	3.26158	24.8208	GREM1;CD63;LRPAP1;SFRP4;ANGPT1;DLG4;NTF3;MAGI2;RSPO1;DKK1
cell morphogenesis involved in neuron differentiation (GO:0048667)	22/97	0.00067109	0.0600802	2.07127	15.134	LINGO1;MEF2C;LUM;SDC2;OMD;KERA;PRELP;S100B;LRRC55;GP5;LRFN3;LRFN5;OPHN1;BTBD3;OGN;SLITRK3;SLITRK6;LRRN1;SLIT3;CNTN4;SLIT2;CTNNA2
cAMP metabolic process (GO:0046058)	9/24	0.000626845	0.0603545	3.42466	25.2562	ADCY9;PDE1B;PDE2A;ADCY4;PDE3A;PDE4B;ADCY3;ADCY2;ADCY5
bone development (GO:0060348)	11/34	0.000689739	0.0606852	2.95461	21.5072	PTGER4;VKORC1;OSR2;SFRP4;RARG;CYP26B1;LRRC17;SH3PXD2B;PLS3;IFITM5;SULF2
striated muscle contraction (GO:0006941)	16/61	0.000670334	0.0610842	2.39539	17.5049	RYR2;MYOM1;TNNC1;GAA;TNNC2;MYBPH;STAC3;ATP1A2;SLC8A1;KLHL41;MYL4;MYH3;JSRP1;TNNT2;CASQ2;SCN1B
regulation of receptor binding (GO:1900120)	5/8	0.000659856	0.0612226	5.70776	41.8007	GREM2;ADAM15;HFE;B2M;MMP9
cGMP biosynthetic process (GO:0006182)	9/24	0.000626845	0.0615152	3.42466	25.2562	GUCY1A3;GUCY1B3;ADCY9;NPR2;ADCY4;ADCY3;ADCY2;ADCY5;AQP1
negative regulation of vascular permeability (GO:0043116)	5/8	0.000659856	0.0623564	5.70776	41.8007	ANGPT1;DDAH1;PDE2A;PDE3A;SLIT2
proteoglycan biosynthetic process (GO:0030166)	9/24	0.000626845	0.0627213	3.42466	25.2562	CSGALNACT1;HS3ST3B1;GLCE;CSGALNACT2;B3GAT1;NDST3;XYLT2;PXYLP1;GAL3ST3
circulatory system development (GO:0072359)	24/109	0.00061868	0.0631425	2.01081	14.8557	MEF2C;RARG;TGFB1;OSR1;SHOX2;GATA6;CACNA1C;PKD2;TBX5;PCSK5;PKD1;HDAC9;CRIP1;POU6F1;GLI2;TGFBR2;GJA1;COL3A1;FLRT3;HAND2;SH3PXD2B;ZFPM2;MEF2D;FBN1
axon extension (GO:0048675)	8/20	0.000763864	0.0660677	3.65297	26.2178	NLGN3;NRP1;ALCAM;AUTS2;SLC9A6;ULK2;SLIT3;SLIT2
cyclic nucleotide metabolic process (GO:0009187)	9/25	0.000884992	0.0705643	3.28767	23.1121	GUCY1A3;GUCY1B3;ADCY9;NPR2;ADCY4;ADCY3;ADCY2;PDE8A;ADCY5
modulation of excitatory postsynaptic potential (GO:0098815)	9/25	0.000884992	0.0716843	3.28767	23.1121	NLGN3;RIMS1;STX1B;NLGN2;RELN;DLG4;LRRK2;SHANK3;SHANK2
dermatan sulfate biosynthetic process (GO:0030208)	6/12	0.000880619	0.0724807	4.56621	32.1228	VCAN;NCAN;DSEL;BGN;CSPG4;CHST14
aminoglycan metabolic process (GO:0006022)	10/30	0.000924313	0.0725657	3.04414	21.2678	VCAN;SDC2;NCAN;B3GAT1;XYLT2;BGN;GPC2;CSPG4;GPC6;GAL3ST3
JAK-STAT cascade (GO:0007259)	12/40	0.000855745	0.0727811	2.73973	19.3522	IFNAR2;STAT5A;STAT5B;STAT1;STAT2;CLCF1;STAT3;CCL2;PKD2;JAK2;PKD1;JAK3
regulation of osteoblast proliferation (GO:0033688)	7/16	0.000872813	0.0730158	3.99543	28.143	GREM1;TNN;EIF2AK2;SOX8;HPSE;ATRAID;CYR61
BMP signaling pathway (GO:0030509)	19/81	0.000988313	0.0752741	2.14217	14.8228	ACVR1;GDF10;LEFTY1;TGFB1;TGFB3;HFE;CHRD;SMAD9;SMAD6;FSTL1;GDF5;RUNX2;BMP6;RGMA;GDF7;TMEM100;TGFBR3;GREM2;BMP3
aminoglycan biosynthetic process (GO:0006023)	13/46	0.000986214	0.0762523	2.5809	17.8641	HS3ST3B1;GALNT5;SDC2;HEXA;XYLT2;B3GALT4;HS3ST6;UGDH;B3GNT9;B3GNT3;GPC2;PXYLP1;GPC6
Pan Mes
Term	Overlap	P-value	Adjusted P-value	Odds Ratio	Combined Score	Genes
positive regulation of vasculature development (GO:1904018)	23/104	3.31651e-14	1.69242e-10	7.47141	231.892	CD40;ECM1;RAMP2;ANXA3;NOS3;PDGFB;VEGFB;TWIST1;VEGFC;ETS1;PIK3R6;CDH5;RRAS;ADAM12;KDR;APLNR;HMOX1;RAPGEF2;ANGPTL4;TEK;CD34;RAPGEF3;ENG
positive regulation of angiogenesis (GO:0045766)	21/103	2.35292e-12	6.00347e-09	6.88796	184.428	CD40;ECM1;RAMP2;ANXA3;NOS3;VEGFB;TWIST1;VEGFC;ETS1;PIK3R6;CDH5;RRAS;ADAM12;KDR;APLNR;HMOX1;ITGA5;ANGPTL4;TEK;CD34;RAPGEF3
regulation of angiogenesis (GO:0045765)	26/177	1.60864e-11	2.73629e-08	4.96259	123.335	CD40;ECM1;RAMP2;PLXND1;NPR1;ECSCR;TWIST1;ETS1;PIK3R6;CDH5;HHEX;RRAS;KDR;HMOX1;CD34;ANXA3;NOS3;SERPINF1;VEGFB;VEGFC;ADAM12;APLNR;ANGPTL4;TEK;RAPGEF3;PF4
regulation of cell migration (GO:0030334)	29/316	7.82034e-08	9.9768e-05	3.10041	50.735	ACVRL1;CSF1R;ROBO4;PLXND1;LEF1;PDGFB;SEMA3G;LDB2;RHOBTB1;TTBK2;WNT11;PLAU;KDR;ENPP2;CCR1;SPAG9;PDGFRA;SUN2;ARAP3;IGF1;RHOC;ABI3;DLC1;SNAI1;ROR2;SGK1;VCL;FERMT3;ENG
vasculogenesis (GO:0001570)	9/32	2.5047e-07	0.00025563	9.50169	144.425	RAMP2;EGFL7;SOX17;FLT4;KDR;APLNR;ADM;RASIP1;ENG
positive regulation of endothelial cell proliferation (GO:0001938)	12/67	5.49341e-07	0.000467214	6.05083	87.2199	ECM1;EGFL7;FLT4;ITGB3;KDR;APLNR;PDGFB;VEGFB;HMOX1;VEGFC;TEK;APLN
positive regulation of endothelial cell migration (GO:0010595)	12/70	8.98891e-07	0.00057338	5.79151	80.6299	BCAS3;CD40;ANXA3;NOS3;FLT4;ITGB3;ATOH8;KDR;PDGFB;TEK;CALR;ETS1
platelet degranulation (GO:0002576)	16/124	8.0143e-07	0.000584242	4.3592	61.1895	SRGN;ECM1;VWF;ACTN1;ITGB3;PLEK;PDGFB;VEGFB;F13A1;VEGFC;IGF1;PECAM1;TIMP1;VCL;FERMT3;PF4
regulated exocytosis (GO:0045055)	17/148	1.90777e-06	0.000973537	3.88057	51.1055	SRGN;ECM1;VWF;ACTN1;ITGB3;PLEK;PDGFB;VEGFB;F13A1;VEGFC;IGF1;RAB31;PECAM1;TIMP1;VCL;FERMT3;PF4
positive regulation of protein phosphorylation (GO:0001934)	31/412	2.18564e-06	0.00101394	2.54198	33.1312	ACVRL1;CSF1R;CD40;RALB;SHC1;FLT4;ITGB3;PDGFB;LPAR1;KDR;ENPP2;S1PR2;NGFR;PDGFRA;MMD;IGF1;AXIN2;GDF9;APLNR;RAPGEF2;HCLS1;LCP2;CALM3;ROR2;ITGA5;CAMK1;TEK;RAPGEF3;LAT;ENG;DDR2
regulation of cell migration involved in sprouting angiogenesis (GO:0090049)	8/30	1.8496e-06	0.00104872	9.00901	118.924	DLL4;MAP3K3;TBXA2R;MMRN2;RHOJ;KDR;HMOX1;HDAC7
peptidyl-tyrosine phosphorylation (GO:0018108)	12/79	3.39596e-06	0.00144413	5.13171	64.6233	PDGFRA;CSF1R;FLT4;GRAP2;KDR;BTK;PDGFB;SLA;CSK;TEK;GRAP;DDR2
sialylation (GO:0097503)	6/16	4.07647e-06	0.00148587	12.6689	157.225	ST3GAL4;ST6GALNAC3;ST3GAL1;ST6GALNAC4;ST3GAL2;ST6GALNAC6
platelet aggregation (GO:0070527)	8/33	4.05691e-06	0.00159249	8.19001	101.68	PDGFRA;CSRP1;ITGB3;PLEK;PIK3CG;ACTB;VCL;FERMT3
extracellular matrix organization (GO:0030198)	21/229	4.90222e-06	0.00166773	3.09808	37.8765	FBN2;ITGA4;VWF;ITGB3;LAMA4;ITGA1;ICAM2;PDGFB;SCX;NID1;ADAM19;ADAMTS4;ADAM12;MFAP2;KDR;ITGA8;PECAM1;TIMP1;ITGA5;LCP1;DDR2
positive regulation of blood vessel endothelial cell migration (GO:0043536)	9/45	5.61416e-06	0.00168524	6.75676	81.6907	MAP3K3;CD40;NOS3;RHOJ;PDGFB;KDR;HMOX1;ETS1;HDAC7
regulation of endothelial cell migration (GO:0010594)	11/69	5.35382e-06	0.00170753	5.38582	65.3715	ACVRL1;DLL4;BCAS3;ANXA3;FLT4;ITGB3;ATOH8;KDR;TEK;CALR;ETS1
positive regulation of cell migration (GO:0030335)	20/221	9.9941e-06	0.0026842	3.05736	35.2009	CCR1;SPAG9;PDGFRA;CSF1R;SUN2;LEF1;PDGFB;SEMA3G;IGF1;SYDE1;WNT11;GLIPR2;PLAU;KDR;SNAI1;ENPP2;RAPGEF2;ROR2;FERMT3;DDR2
positive regulation of epithelial cell migration (GO:0010634)	11/74	1.07351e-05	0.00273906	5.02191	57.4607	BCAS3;GLIPR2;ANXA3;FLT4;ITGB3;ATOH8;KDR;ENPP2;TEK;CALR;ETS1
regulation of cell proliferation (GO:0042127)	44/740	9.71455e-06	0.00275408	2.00877	23.1849	KANK2;ACVRL1;CSF1R;CD40;SHC1;FLT4;LEF1;PDGFB;SCX;SLA;ETS1;DLL4;ESM1;FRZB;ADAMTS1;GRAP2;KDR;CSK;TIMP1;S1PR2;SOX7;NGFR;PDGFRA;NOS3;ITGA1;VEGFC;IGF1;SSTR1;AXIN2;TBX2;GDF9;FABP7;DLC1;ALDH1A2;IRF1;BCL6B;BTK;HCLS1;RAPGEF2;ROR2;CALR;GRAP;SGK1;PF4
positive regulation of sprouting angiogenesis (GO:1903672)	7/28	1.3236e-05	0.0028143	8.44595	94.8697	MAP3K3;RHOJ;KDR;APLNR;HMOX1;ITGA5;HDAC7
regulation of platelet activation (GO:0010543)	6/19	1.28022e-05	0.00284043	10.6686	120.191	PDGFRA;THBD;FCER1G;NOS3;PLEK;PDGFB
homotypic cell-cell adhesion (GO:0034109)	8/38	1.25422e-05	0.00290922	7.11238	80.2732	PDGFRA;CSRP1;ITGB3;PLEK;PIK3CG;ACTB;VCL;FERMT3
regulation of actin cytoskeleton organization (GO:0032956)	11/75	1.22486e-05	0.00297642	4.95495	56.041	PDGFRA;CSF1R;DLC1;RHOJ;TWF2;ARHGAP18;ARHGAP28;RHOC;CORO1A;RAPGEF3;RHOBTB1
peptidyl-tyrosine modification (GO:0018212)	9/51	1.64569e-05	0.00335919	5.96184	65.6683	PDGFRA;TPST1;CSF1R;FLT4;KDR;BTK;PDGFB;TEK;DDR2
regulation of cell motility (GO:2000145)	13/109	2.03689e-05	0.00371223	4.02926	43.522	CSF1R;ROBO4;PLXND1;WAS;ARHGAP18;TWIST1;LDB2;RHOC;RHOBTB1;TTBK2;ABI3;ENPP2;SGK1
cell-cell junction assembly (GO:0007043)	11/79	2.03093e-05	0.00383846	4.70407	50.8248	CDH6;CDH5;CLDN5;RAMP2;GJA5;GJA4;RAB13;MICALL2;RHOC;VCL;CDH19
regulation of endothelial cell proliferation (GO:0001936)	11/79	2.03093e-05	0.00398609	4.70407	50.8248	ACVRL1;ECM1;EGFL7;FLT4;ITGB3;ATOH8;KDR;PDGFB;VEGFB;VEGFC;TEK
cell morphogenesis involved in differentiation (GO:0000904)	9/54	2.65839e-05	0.00467785	5.63063	59.3198	ITGA4;ITGB3;ACTN1;LEF1;ITGA8;MICALL2;RADIL;TEK;FERMT3
substrate adhesion-dependent cell spreading (GO:0034446)	7/32	3.39499e-05	0.00577488	7.3902	76.0498	ITGA4;ITGB3;MICALL2;ITGA8;RADIL;TEK;FERMT3
small GTPase mediated signal transduction (GO:0007264)	12/99	3.583e-05	0.00589808	4.095	41.9194	ARHGAP31;RRAS;SHC1;GRAP2;ARHGAP18;RAPGEF2;IGF1;GRAP;RASGRP2;RGL1;LAT;RASGRP3
negative regulation of signal transduction (GO:0009968)	22/283	3.96127e-05	0.0059454	2.6263	26.6211	KANK2;PDGFRA;CSF1R;PTPN18;EGFL7;FLT4;TIE1;PLEK;PEAR1;NKD2;APLN;DLL4;HHEX;FRZB;MMRN2;KDR;DACT3;CALR;ROR2;TEK;DDR2;DACT1
sprouting angiogenesis (GO:0002040)	8/44	3.88807e-05	0.00601237	6.14251	62.3772	ACVRL1;CDH5;RAMP2;ESM1;FLT4;LEF1;KDR;TEK
Ras protein signal transduction (GO:0007265)	19/223	3.83561e-05	0.00611659	2.87844	29.2697	NGFR;RAB2B;SHC1;IGF1;RHOC;RASGRP2;RHOBTB1;RAB30;RAB31;RRAS;GRAP2;RHOJ;RAB13;RAC2;RAPGEF2;CDC42EP1;GRAP;RAPGEF3;LAT
macromolecule modification (GO:0043412)	6/24	5.59789e-05	0.00772055	8.44595	82.6903	ST3GAL4;ST6GALNAC3;ST6GALNAC4;ST3GAL1;ST3GAL2;ST6GALNAC6
transmembrane receptor protein tyrosine kinase signaling pathway (GO:0007169)	27/396	5.55949e-05	0.00788058	2.30344	22.5678	CSF1R;SHC1;FLT4;ITGB3;PDGFB;SLA;ACTB;GRAP2;KDR;NCKAP1L;CSK;AP3S1;NGFR;PDGFRA;VEGFB;VEGFC;IGF1;VAV1;DNM1;EFNA2;BTK;RAPGEF2;LCP2;GRAP;TEK;PLCB1;DDR2
cell junction assembly (GO:0034329)	9/59	5.50822e-05	0.00803098	5.15346	50.5383	CDH6;CDH5;CLDN5;RAMP2;GJA4;ACTB;VCL;CDH19;LIMS1
positive regulation of cell differentiation (GO:0045597)	17/194	6.83863e-05	0.00894808	2.96043	28.3916	ACVRL1;FBN2;SPAG9;LEF1;TWIST1;IGF1;AXIN2;GLIPR2;FRZB;KDR;SNAI1;TMEM119;RAPGEF2;CAMK1;CD34;DDR2;PF4
protein autophosphorylation (GO:0046777)	16/175	6.70728e-05	0.00900717	3.0888	29.6826	CAMK2B;PDGFRA;CSF1R;MAP3K3;FLT4;CAMK2A;SLA;STK10;MEX3B;GRAP2;KDR;BTK;CSK;GRAP;TEK;DDR2
negative regulation of blood coagulation (GO:0030195)	7/36	7.59869e-05	0.00945759	6.56907	62.3073	THBD;PDGFRA;PLAU;NOS3;PDGFB;TFPI;CD34
positive regulation of cell migration involved in sprouting angiogenesis (GO:0090050)	5/16	7.44164e-05	0.00949367	10.5574	100.357	MAP3K3;RHOJ;KDR;HMOX1;HDAC7
regulation of actin filament-based process (GO:0032970)	9/62	8.21949e-05	0.00998668	4.9041	46.13	CNN2;DLC1;RHOJ;TWF2;ARHGAP18;ARHGAP28;RHOC;CORO1A;RHOBTB1
positive regulation of cell motility (GO:2000147)	16/179	8.77989e-05	0.0104195	3.01978	28.2061	CCR1;SPAG9;PDGFRA;CSF1R;SUN2;LEF1;PDGFB;SEMA3G;TWIST1;IGF1;WNT11;PLAU;KDR;SNAI1;ROR2;FERMT3
receptor internalization (GO:0031623)	8/50	0.000100778	0.0114282	5.40541	49.7437	CACNG7;RAMP2;CACNG8;FCER1G;RAB31;CALCRL;ADM;DNM1
regulation of bone mineralization (GO:0030500)	8/50	0.000100778	0.011688	5.40541	49.7437	SRGN;FBN2;CCR1;ECM1;S1PR1;TMEM119;TWIST1;DDR2
positive regulation of kinase activity (GO:0033674)	12/113	0.000131683	0.0146082	3.58766	32.0561	PDGFRA;CSF1R;MMD;FLT4;TIE1;KDR;RAPGEF2;LCP2;ROR2;TEK;LAT;DDR2
negative regulation of cell activation (GO:0050866)	4/10	0.000138423	0.0147161	13.5135	120.07	THBD;PDGFRA;NOS3;PDGFB
negative regulation of cellular process (GO:0048523)	32/534	0.000138322	0.0150183	2.0245	17.9895	KANK2;ACVRL1;PLXND1;HPGD;NPR1;NOTCH4;ETS1;DLL4;WNT11;SOX17;FRZB;ADAMTS1;DACT3;CSK;SOX7;CD34;BTN2A2;NOS3;ACTN1;ITGA1;AXIN2;SSTR1;IMPACT;PSRC1;FABP7;DLC1;IRF1;ALDH1A2;RAPGEF2;ROR2;CRLF3;PF4
regulation of GTPase activity (GO:0043087)	16/188	0.00015599	0.0159203	2.87522	25.2033	GPSM1;BCAS3;CD40;RIC1;PLXND1;RASGRP2;VAV1;RASIP1;FGD1;SYDE1;SNX18;WNT11;RGS10;RAPGEF2;RAPGEF3;LIMS1
positive regulation of MAPK cascade (GO:0043410)	21/289	0.000153112	0.0159455	2.45488	21.5645	CCR1;NGFR;PDGFRA;CSF1R;CD40;SHC1;FLT4;TIE1;PDGFB;LPAR1;IGF1;TPD52L1;PIK3R6;PIK3CG;GLIPR2;GPR183;KDR;RAPGEF2;ROR2;TEK;DDR2
regulation of actin filament polymerization (GO:0030833)	9/68	0.000170616	0.0170717	4.47138	38.7941	KANK2;RAC2;TWF2;HCLS1;CDC42EP1;ARHGAP18;NCKAP1L;ARHGAP28;KANK3
regulation of blood vessel endothelial cell proliferation involved in sprouting angiogenesis (GO:1903587)	4/11	0.000212436	0.0204539	12.285	103.893	DLL4;NGFR;APLNR;HMOX1
regulation of actin cytoskeleton reorganization (GO:2000249)	6/30	0.000212343	0.0208382	6.75676	57.144	CSF1R;PDGFRA;BCAS3;HCLS1;TEK;RAPGEF3
enzyme linked receptor protein signaling pathway (GO:0007167)	12/120	0.000233027	0.0220211	3.37838	28.258	CSF1R;SHC1;NPR1;GRAP2;FLT4;KDR;BTK;SLA;LCP2;CSK;GRAP;TEK
mesoderm formation (GO:0001707)	5/20	0.000239434	0.0222151	8.44595	70.4158	ITGB3;LEF1;ITGA8;SNAI1;SCX
regulation of small GTPase mediated signal transduction (GO:0051056)	13/140	0.00027171	0.0247596	3.13707	25.7577	ARHGAP18;ARAP3;ARHGAP28;RHOC;RHOBTB1;VAV1;FGD1;SYDE1;ARHGAP31;ARHGEF9;DLC1;RHOJ;RAC2
regulation of focal adhesion assembly (GO:0051893)	7/44	0.00028425	0.0254479	5.37469	43.8879	ACVRL1;BCAS3;DLC1;KDR;TEK;PHLDB2;LIMS1
cell-matrix adhesion (GO:0007160)	10/90	0.000326488	0.0287253	3.75375	30.1318	ITGA4;ITGB3;ACTN1;DLC1;ITGA1;ITGA8;ZYX;EMILIN1;CD34;VCL
regulation of MAPK cascade (GO:0043408)	16/203	0.000372961	0.0317203	2.66276	21.0199	NGFR;PDGFRA;CSF1R;CD40;SHC1;FLT4;PDGFB;LPAR1;APIP;IGF1;GDF9;RRAS;KDR;ROR2;TEK;DDR2
regulation of stress fiber assembly (GO:0051492)	8/60	0.000370672	0.03206	4.5045	35.5865	WNT11;ARHGEF15;DLC1;WAS;LPAR1;ARHGAP28;PHLDB2;RAPGEF3
regulation of vascular endothelial growth factor receptor signaling pathway (GO:0030947)	5/22	0.000387242	0.032395	7.67813	60.3229	HHEX;TMEM204;ITGB3;MMRN2;ITGA5
hemopoiesis (GO:0030097)	9/76	0.000400141	0.0329342	4.00071	31.3003	LYL1;CSF1R;RRAS;TAL1;NOTCH4;PLEK;KDR;TEK;CD34
regulation of leukocyte migration (GO:0002685)	4/13	0.000439034	0.0355618	10.395	80.3631	STK10;RAC2;MSN;HMOX1
glomerulus vasculature development (GO:0072012)	3/6	0.000482717	0.037897	16.8919	128.988	PECAM1;TEK;CD34
positive regulation of granulocyte differentiation (GO:0030854)	3/6	0.000482717	0.0384891	16.8919	128.988	LEF1;HCLS1;EVI2B
regulation of cytoskeleton organization (GO:0051493)	10/95	0.000505575	0.0390902	3.55619	26.9908	SYDE1;DLC1;RHOJ;TWF2;ARHGAP18;ARHGAP28;RHOC;PHLDB2;CORO1A;RHOBTB1
positive regulation of developmental process (GO:0051094)	11/113	0.000529101	0.0402985	3.28869	24.8109	SYDE1;FOXD1;KDR;ENPP2;PDGFB;TMEM119;SCX;CAMK1;PLCB1;CD34;RAPGEF3
negative regulation of focal adhesion assembly (GO:0051895)	4/14	0.000600318	0.0437632	9.65251	71.6028	ACVRL1;BCAS3;DLC1;PHLDB2
branching involved in blood vessel morphogenesis (GO:0001569)	4/14	0.000600318	0.0443974	9.65251	71.6028	DLL4;NOTCH4;LEF1;ENG
negative regulation of cytoskeleton organization (GO:0051494)	5/24	0.000595185	0.0446651	7.03829	52.2708	KANK2;LIMA1;TWF2;CORO1A;KANK3
blood circulation (GO:0008015)	7/50	0.000635774	0.0456951	4.72973	34.814	ACVRL1;DLL4;NFE2;SGCD;ADORA2A;NOS3;ADM
positive regulation of neuron differentiation (GO:0045666)	10/98	0.000647576	0.045897	3.44732	25.3112	FZD1;CAMK2B;IMPACT;MMD;TCF12;TWF2;RAPGEF2;TCF4;CAMK1;SCARF1
calcitonin family receptor signaling pathway (GO:0097646)	3/7	0.000826179	0.0507951	14.4788	102.78	RAMP2;CALCRL;ADM
dorsal aorta morphogenesis (GO:0035912)	3/7	0.000826179	0.0514145	14.4788	102.78	ACVRL1;DLL4;ENG
positive regulation of protein kinase C signaling (GO:0090037)	3/7	0.000826179	0.0520493	14.4788	102.78	CD40;WNT11;FLT4
regulation of cell junction assembly (GO:1901888)	4/15	0.000799549	0.0523089	9.00901	64.2474	CLDN5;CBFB;SNAI1;RAPGEF2
dorsal aorta development (GO:0035907)	3/7	0.000826179	0.0526999	14.4788	102.78	ACVRL1;DLL4;ENG
negative regulation of platelet activation (GO:0010544)	4/15	0.000799549	0.0529883	9.00901	64.2474	PDGFRA;THBD;NOS3;PDGFB
positive regulation of cAMP metabolic process (GO:0030816)	5/26	0.000877212	0.0532906	6.49688	45.73	RAMP2;ADM;CALM3;RAPGEF3;PF4
positive regulation of protein serine/threonine kinase activity (GO:0071902)	11/118	0.000762863	0.0533272	3.14934	22.6073	CSF1R;CD40;PSRC1;RALB;PDGFB;RAPGEF2;CALM3;CAMK1;TPD52L1;PIK3R6;PIK3CG
cardiac atrium development (GO:0003230)	3/7	0.000826179	0.053367	14.4788	102.78	DLL4;GJA5;ENG
vasculature development (GO:0001944)	4/15	0.000799549	0.0536855	9.00901	64.2474	ACVRL1;PDGFRA;NOTCH4;FLT4
negative regulation of protein binding (GO:0032091)	8/67	0.000788662	0.0543857	4.03388	28.8228	RALB;ITGA4;PDGFB;TMC8;CAMK1;ACTB;DACT1;TTBK2
negative regulation of adherens junction organization (GO:1903392)	4/15	0.000799549	0.0544013	9.00901	64.2474	ACVRL1;BCAS3;DLC1;PHLDB2
Early Mes
Term	Overlap	P-value	Adjusted P-value	Odds Ratio	Combined Score	Genes
rRNA processing (GO:0006364)	71/202	1.7356e-26	8.85679e-23	4.13755	245.423	LTV1;RPL30;RPL34;RPLP1;RPP30;WDR3;WDR43;RPL7;RRP9;RPS14;FBL;MRPL1;RPS19;RPL36;RPLP2;RPL38;RIOK2;RPL37;RPS11;RRP15;RPP38;RPS8;DIS3;WDR75;IMP4;RPSA;EBNA1BP2;DKC1;MRTO4;NHP2;RPL24;SRFBP1;RPL26;RPL29;SKIV2L2;RPL11;HEATR1;MAK16;RPL36A;NOLC1;NOL8;RPF1;EXOSC9;PES1;EXOSC8;RPL14;RPS2;RPL18;LYAR;EXOSC2;MDN1;RPL41;UTP6;NOP58;PNO1;RPP40;WDR12;WDR55;BYSL;RCL1;RPS25;RSL1D1;TBL3;RPS28;LSM6;RPS29;MPHOSPH10;TSR1;…
ribosome biogenesis (GO:0042254)	73/226	1.3042e-24	3.32766e-21	3.80234	209.115	LTV1;RPL30;RPL34;RPLP1;RPP30;WDR3;NOC2L;WDR43;RPL7;RRP9;RPS14;FBL;RPS19;RPL36;RPLP2;RPL38;RIOK2;RPL37;RPS11;RPP38;NOM1;RPS8;DIS3;WDR74;WDR75;IMP4;RPSA;GNL3;EBNA1BP2;DKC1;MRTO4;RPL24;RPL26;RPL29;NIP7;RPL11;HEATR1;RPL36A;NOLC1;NOL8;SDAD1;RPF2;RPF1;EXOSC9;PES1;EXOSC8;RPL14;RPS2;RPL18;LYAR;EXOSC2;MDN1;RPL41;NPM1;UTP6;NOP58;PNO1;RPP40;WDR12;WDR55;BYSL;RCL1;RPS25;TBL3;RPS28;RPS29;MPHOSPH10;TSR1;ABCE1;R…
ncRNA processing (GO:0034470)	70/227	2.44163e-22	4.15322e-19	3.63002	180.645	LTV1;RPL30;ZCCHC11;POP1;RPL34;RPLP1;RPP30;WDR3;WDR43;RPL7;RRP9;RPS14;FBL;RPS19;RPL36;RPLP2;RPL38;RIOK2;RPL37;RPS11;RPP38;RPS8;DIS3;WDR75;IMP4;RPSA;EBNA1BP2;KARS;DKC1;MRTO4;RPL24;RPL26;RPL29;RPL11;HEATR1;RPL36A;NOLC1;NOL8;RPF1;EXOSC9;PES1;EXOSC8;RPL14;RPS2;RPL18;LYAR;EXOSC2;MDN1;RPL41;UTP6;NOP58;SSB;PNO1;RPP40;ADAT1;WDR12;WDR55;BYSL;RCL1;RPS25;TBL3;RPS28;LIN28B;RPS29;MPHOSPH10;TSR1;RPS21;INTS8;RPS…
rRNA metabolic process (GO:0016072)	64/200	1.72174e-21	2.19651e-18	3.76692	180.1	LTV1;RPL30;RPL34;RPLP1;RPP30;WDR3;WDR43;RPL7;RRP9;RPS14;FBL;RPS19;RPL36;RPLP2;RPL38;RIOK2;RPL37;RPS11;RPP38;RPS8;DIS3;WDR75;IMP4;RPSA;EBNA1BP2;DKC1;MRTO4;RPL24;RPL26;RPL29;RPL11;HEATR1;RPL36A;NOLC1;NOL8;RPF1;EXOSC9;PES1;EXOSC8;RPL14;RPS2;RPL18;LYAR;EXOSC2;MDN1;RPL41;UTP6;NOP58;NIFK;PNO1;RPP40;WDR12;WDR55;BYSL;RCL1;RPS25;TBL3;RPS28;RPS29;MPHOSPH10;TSR1;RPS21;RPS24;MPHOSPH6
translation (GO:0006412)	65/232	2.03796e-18	2.07995e-15	3.29809	134.346	CARS;RPL30;MRPS15;GFM2;RPL34;RPLP1;YARS2;RPL7;MRPL41;EFTUD2;RPS14;MRPL42;MTRF1;MRPL1;EEF2K;RPS19;RARS;RPL36;RPLP2;RPL38;RPL37;RPS11;RARS2;RPS8;PABPC4;MRPS18B;MRPS21;DARS2;MRPL47;RPSA;MRPS18C;KARS;PPA1;EEF1D;MRTO4;NHP2;RPL24;GARS;ETF1;RPL26;RPL29;MTRF1L;MRPS33;RPL11;RPL36A;TARS;MRPL13;GSPT1;RPL14;EIF4EBP2;RPS2;RPL18;PTCD3;RWDD1;RPL41;GATB;RPS25;RSL1D1;RPS28;QARS;RPS29;ABCE1;RPS21;RPS24;FARSB
cellular macromolecule biosynthetic process (GO:0034645)	84/367	2.15112e-17	1.82953e-14	2.69432	103.403	RPL30;MRPS15;FEN1;ALAS2;RPL34;RPLP1;MCM10;BRCA1;PWP1;YARS2;RPL7;MRPL41;EFTUD2;RPS14;MRPL42;MRPL1;EEF2K;RPS19;EXO1;CHEK1;RPL36;RPLP2;RPL38;RPL37;RPS11;RFC4;RPS8;PABPC4;MRPS18B;HUS1;MRPS21;RPSA;CDC25C;ILF2;MRPS18C;KIN;EEF1D;GRWD1;NHP2;RPL24;MCM4;MCM5;RPL26;DNA2;RPL29;BLM;GTF3C6;MRPS33;RPL11;RPL36A;TARS;MRPL13;GSPT1;ORC5;ORC6;CDC45;ORC1;ORC2;RPL14;EIF4EBP2;POLR2F;RPS2;CLSPN;POLR2H;RPL18;POLR2K;RPL41…
peptide biosynthetic process (GO:0043043)	45/174	7.49141e-12	5.46124e-09	3.04439	77.9889	RPL30;MRPS15;RPL34;RPLP1;MRPS33;RPL11;RPL36A;TARS;YARS2;MRPL13;GSPT1;RPL7;MRPL41;RPS14;MRPL42;MRPL1;RPS19;RPL36;RPL14;EIF4EBP2;RPLP2;RPL38;RPL37;RPS2;RPS11;RPL18;RPL41;RPS8;PABPC4;MRPS18B;MRPS21;GATB;RPSA;MRPS18C;RPS25;RSL1D1;RPS28;RPS29;NHP2;RPL24;RPL26;RPL29;RPS21;RPS24;FARSB
G1/S transition of mitotic cell cycle (GO:0000082)	33/105	1.61871e-11	9.17811e-09	3.69966	91.9246	TRIM71;PRIM2;PCNA;PRIM1;MCM10;GSPT1;ORC5;ORC6;CDC45;ORC1;MYC;ORC2;EIF4EBP1;RCC1;FBXO5;EIF4E;RANBP1;RRM2;CDC6;DHFR;POLA2;CDC34;TFDP1;CCNE2;NASP;CCNE1;POLE2;RPA3;MCM4;MCM5;BCAT1;CUL4B;CDKN3
ribosomal large subunit biogenesis (GO:0042273)	25/63	1.45363e-11	9.27236e-09	4.67128	116.569	NIP7;RPL11;MAK16;NOC2L;SDAD1;RPF2;RPL7;RPF1;MRPL20;MRPL1;PES1;RPL14;BRIX1;RRP15;MDN1;NPM1;WDR74;WDR12;WDR55;RSL1D1;EBNA1BP2;MRTO4;NHP2;RPL24;RPL26
cell cycle G1/S phase transition (GO:0044843)	29/92	2.50909e-10	1.28039e-07	3.71062	82.0268	TRIM71;PRIM2;PRIM1;MCM10;GSPT1;ORC5;ORC6;CDC45;ORC1;MYC;ORC2;EIF4EBP1;RCC1;EIF4E;RANBP1;CDC6;CCNA2;POLA2;CDC34;CCNE2;NASP;CCNE1;POLE2;RPA3;MCM4;MCM5;BCAT1;CUL4B;CDKN3
mitotic cell cycle phase transition (GO:0044772)	49/221	3.34328e-10	1.42173e-07	2.61	56.9473	TRIM71;MCM10;CHEK2;MYC;CDC27;RCC1;NEK2;HSP90AA1;CEP135;HAUS3;HAUS6;CDC25C;CCNA2;CDC34;CCNE2;CCNE1;MCM4;MCM5;MAPRE1;BCAT1;ANAPC1;PRIM2;PRIM1;USH1C;GSPT1;AURKA;ORC5;CCNB1;ORC6;CDC45;ORC1;PRKAR2B;HAUS7;ORC2;EIF4EBP1;CEP192;EIF4E;CEP78;RANBP1;CDC6;TUBB4B;POLA2;NASP;RPA3;POLE2;ALMS1;FGFR1OP;CDKN3;CUL4B
viral gene expression (GO:0019080)	32/110	3.07955e-10	1.42863e-07	3.42447	74.9996	RPL30;NUP205;RPL34;RPLP1;RPL11;RPL36A;AAAS;RPL7;RPS14;RPS19;RPL36;RPL14;RPLP2;RPL38;NUP43;RPL37;RPS2;RPS11;RPL18;RPL41;RPS8;RPSA;RPS25;RPS28;RPS29;NUP50;RPL24;RPL26;RPL29;RPS21;RPS24;NUP37
SRP-dependent cotranslational protein targeting to membrane (GO:0006614)	28/89	5.35763e-10	2.10308e-07	3.70343	79.0584	RPL30;RPL34;RPLP1;RPL11;RPL36A;RPL7;RPS14;RPS19;RPL36;RPL14;RPLP2;RPL38;RPL37;RPS2;RPS11;RPL18;RPL41;RPS8;RPSA;SRP9;RPS25;RPS28;RPS29;RPL24;RPL26;RPL29;RPS21;RPS24
viral transcription (GO:0019083)	32/113	6.56743e-10	2.39383e-07	3.33356	70.4839	RPL30;NUP205;RPL34;RPLP1;RPL11;RPL36A;AAAS;RPL7;RPS14;RPS19;RPL36;RPL14;RPLP2;RPL38;NUP43;RPL37;RPS2;RPS11;RPL18;RPL41;RPS8;RPSA;RPS25;RPS28;RPS29;NUP50;RPL24;RPL26;RPL29;RPS21;RPS24;NUP37
cotranslational protein targeting to membrane (GO:0006613)	28/93	1.65246e-09	5.62167e-07	3.54415	71.6662	RPL30;RPL34;RPLP1;RPL11;RPL36A;RPL7;RPS14;RPS19;RPL36;RPL14;RPLP2;RPL38;RPL37;RPS2;RPS11;RPL18;RPL41;RPS8;RPSA;SRP9;RPS25;RPS28;RPS29;RPL24;RPL26;RPL29;RPS21;RPS24
nuclear-transcribed mRNA catabolic process, nonsense-mediated decay (GO:0000184)	31/112	2.23742e-09	7.13598e-07	3.25822	64.897	RPL30;RPL34;RPLP1;RPL11;RPL36A;GSPT1;RPL7;RPS14;RPS19;RPL36;RPL14;RPLP2;RPL38;RPL37;RPS2;RPS11;RPL18;RPL41;RPS8;RPSA;RPS25;RPS28;RPS29;RPL24;ETF1;EIF3E;RPL26;PABPC1;RPL29;RPS21;RPS24
protein targeting to ER (GO:0045047)	28/97	4.7374e-09	1.42206e-06	3.398	65.132	RPL30;RPL34;RPLP1;RPL11;RPL36A;RPL7;RPS14;RPS19;RPL36;RPL14;RPLP2;RPL38;RPL37;RPS2;RPS11;RPL18;RPL41;RPS8;RPSA;SRP9;RPS25;RPS28;RPS29;RPL24;RPL26;RPL29;RPS21;RPS24
cytoplasmic translation (GO:0002181)	20/54	6.56747e-09	1.86188e-06	4.35986	82.1448	RWDD1;RPL30;RPL41;RPLP1;RPL11;RPL36A;GSPT1;RPL7;RPS28;EIF3M;RPS29;MRTO4;RPL36;RPLP2;RPL24;RPL38;RPL26;RPL29;RPL18;RPS21
centromere complex assembly (GO:0034508)	16/36	9.70027e-09	2.47502e-06	5.23184	96.5332	CENPU;HELLS;NPM1;CENPW;SMARCA5;CENPE;NASP;CENPH;RUVBL1;CENPK;OIP5;CENPN;RBBP7;CENPP;CENPQ;ITGB3BP
histone exchange (GO:0043486)	16/36	9.70027e-09	2.60529e-06	5.23184	96.5332	CENPU;NPM1;CENPW;SMARCA5;NASP;CENPH;RUVBL1;CENPK;ANP32E;OIP5;CENPN;RBBP7;ANP32B;CENPP;CENPQ;ITGB3BP
chromatin remodeling at centromere (GO:0031055)	15/32	1.14639e-08	2.78574e-06	5.51795	100.891	CENPU;HELLS;NPM1;CENPW;SMARCA5;NASP;CENPH;RUVBL1;CENPK;OIP5;CENPN;RBBP7;CENPP;CENPQ;ITGB3BP
DNA metabolic process (GO:0006259)	58/314	1.29782e-08	3.01035e-06	2.17438	39.4867	DCLRE1B;FEN1;HMGB3;MCM10;BRCA1;HMGB1;BRCA2;EXO1;CHEK1;TK1;KPNA2;GEN1;HELLS;RFC4;LIG1;USP45;HUS1;LIG4;TERF1;CDC25C;KIN;CDC34;GRWD1;PSME4;MCM4;MCM5;DNA2;DCTPP1;PRIM2;BLM;PCNA;UHRF1;PRIM1;PDS5A;RAD51AP1;ORC5;SLX4;ORC6;CDC45;ORC1;ORC2;RAD54L;CLSPN;NPM1;DUT;DONSON;CDC6;GTF2H3;PALB2;FAM111A;POLA2;RAD51;NASP;RPA3;APEX1;POLE2;UBE2U;RAN
gene expression (GO:0010467)	70/411	1.41751e-08	3.14503e-06	2.0049	36.2321	RPL30;MRPS15;RPL34;RPLP1;PWP1;YARS2;RPL7;MRPL41;MRPL42;RPS14;MRPL1;RPS19;CLP1;RPL36;RPLP2;RPL38;RPL37;RPS11;EIF5A;RPS8;PABPC4;THOC1;MRPS18B;MRPS21;RPSA;ILF2;THOC7;MRPS18C;DKC1;NUP50;SNRPG;NHP2;RPL24;RPL26;RPL29;NUP205;GTF3C6;MRPS33;RPL11;RPL36A;TARS;U2AF1;AAAS;MRPL13;GSPT1;HSPD1;DHX30;DHX33;RPL14;EIF4EBP2;POLR2F;NUP43;RPS2;POLR2H;RPL18;EIF4E;POLR2K;RPL41;ALYREF;GATB;RPS25;RSL1D1;PPP5C;RPS28;RPS29…
regulation of mitotic cell cycle phase transition (GO:1901990)	40/184	2.46923e-08	5.2502e-06	2.55905	44.8263	PSMD10;PSMD12;PSMD11;BUB1B;HMMR;PSMB10;PSMA7;CDC14B;AURKA;PSMA8;PSMB7;CCNB1;PRKAR2B;HAUS7;CDC27;KNTC1;NEK2;CEP192;RIOK2;FBXO5;CEP78;HSP90AA1;CEP135;HAUS3;HAUS6;CDC6;TUBB4B;TPX2;PSMA6;CENPE;PSMA4;PSMC6;PSMC3;PSME3;PSME4;ALMS1;FGFR1OP;MAPRE1;ANAPC1;MAD2L1
regulation of telomerase RNA localization to Cajal body (GO:1904872)	11/18	2.92469e-08	5.96989e-06	7.19377	124.794	CCT3;CCT6A;DKC1;RUVBL2;RUVBL1;NHP2;CCT8;CCT7;NOP10;CCT5;DCP2
DNA replication-independent nucleosome assembly (GO:0006336)	16/39	3.91327e-08	6.886e-06	4.82939	82.3715	CENPU;NPM1;CENPW;SMARCA5;NASP;CENPH;RUVBL1;HAT1;CENPK;OIP5;CENPN;RBBP7;CENPP;CENPQ;ITGB3BP;ASF1B
positive regulation of telomerase RNA localization to Cajal body (GO:1904874)	10/15	3.84831e-08	7.01355e-06	7.84775	133.985	CCT3;CCT6A;DKC1;RUVBL2;RUVBL1;NHP2;CCT8;CCT7;NOP10;CCT5
CENP-A containing chromatin organization (GO:0061641)	14/30	3.81577e-08	7.21181e-06	5.49343	93.8362	CENPU;NPM1;CENPW;SMARCA5;NASP;CENPH;RUVBL1;CENPK;OIP5;CENPN;RBBP7;CENPP;CENPQ;ITGB3BP
CENP-A containing nucleosome assembly (GO:0034080)	14/30	3.81577e-08	7.48918e-06	5.49343	93.8362	CENPU;NPM1;CENPW;SMARCA5;NASP;CENPH;RUVBL1;CENPK;OIP5;CENPN;RBBP7;CENPP;CENPQ;ITGB3BP
nuclear-transcribed mRNA catabolic process (GO:0000956)	38/174	4.8177e-08	8.1949e-06	2.57082	43.3141	RPL30;ZCCHC11;RPL34;RPLP1;RPL11;RPL36A;GSPT1;RPL7;RPS14;RPS19;EXOSC9;EXOSC8;RPL36;RPL14;RPLP2;RPL38;RPL37;RPS2;RPS11;RPL18;EIF4E;RPL41;RPS8;PAPD4;RPSA;RPS25;RPS28;RPS29;MRTO4;RPL24;ETF1;EIF3E;RPL26;PABPC1;RPL29;RPS21;RPS24;DCP2
translational termination (GO:0006415)	25/96	2.84307e-07	4.68006e-05	3.06553	46.2074	MRPS15;GFM2;MRPS33;MRPL39;MRPL12;MRPL13;GSPT1;MRPL41;MRPL42;MRPL20;MTRF1;MRPL1;CHCHD1;PTCD3;MRPS22;MRPS23;MRPS18B;MRPS21;MRPL47;MRPL46;MRPS18C;MRPL22;ETF1;ABCE1;MTRF1L
maturation of LSU-rRNA (GO:0000470)	11/22	4.70475e-07	7.50261e-05	5.88582	85.7535	RSL1D1;MRPL1;PES1;MAK16;NHP2;RPF2;WDR12;RRP15;FTSJ3;RPF1;RPL7
nucleocytoplasmic transport (GO:0006913)	16/46	5.79805e-07	8.70219e-05	4.09448	58.7991	EIF5A;NUP205;NPM1;ANP32A;AAAS;BACH2;SNRPD2;SNRPD1;ANP32E;SNRPG;GEMIN4;GEMIN5;GEMIN6;SNRPE;SNRPD3;SMN1
maturation of SSU-rRNA (GO:0030490)	16/46	5.79805e-07	8.96589e-05	4.09448	58.7991	UTP6;RPS8;WDR3;UTP23;HEATR1;RPS14;TBL3;RPS28;LSM6;RPS19;TSR1;MPHOSPH10;RIOK2;NOL10;SRFBP1;RPS24
DNA replication (GO:0006260)	28/120	6.62271e-07	9.65591e-05	2.74671	39.0791	BLM;FEN1;MCM10;BRCA1;ORC5;ORC6;CDC45;ORC1;EXO1;CHEK1;ORC2;CLSPN;DUT;RFC4;DONSON;HUS1;CDC6;CDC25C;FAM111A;KIN;POLA2;NASP;GRWD1;POLE2;RPA3;MCM4;MCM5;DNA2
ribonucleoprotein complex assembly (GO:0022618)	33/156	7.77136e-07	0.000110159	2.49015	35.0306	ISY1;DDX1;RPL11;RPS27L;RPF2;RPF1;RPS14;MRPL20;SNRPD2;RPS19;CLP1;SNRPD1;DENR;RPL38;BRIX1;SNRPD3;SMN1;MDN1;PRMT5;HSP90AA1;NPM1;RPSA;LSM3;RPS28;CLNS1A;MRTO4;SNRPG;GEMIN4;RPL24;GEMIN5;SNRPE;GEMIN6;SNRPC
regulation of mRNA stability (GO:0043488)	29/128	8.10783e-07	0.000111822	2.66701	37.4055	PSMD10;PSMD12;PSMD11;ANP32A;FMR1;PSMB10;PSMA7;PSMA8;PSMB7;PCBP4;EXOSC9;EXOSC8;IGF2BP1;TNPO1;EXOSC2;HSPA8;NPM1;DIS3;SLC11A1;PSMA6;CARHSP1;PSMA4;PSMC6;PSMC3;PSME3;APEX1;PSME4;PABPC1;DCP2
viral process (GO:0016032)	41/220	1.33382e-06	0.000179117	2.1938	29.6766	RPL30;NUP205;CTBP2;RPL34;RPLP1;RPL11;RPL36A;NUCKS1;AAAS;RPL7;RPS14;RPS19;AP1S2;RPL36;RPL14;RCC1;RPLP2;DENR;RPL38;NUP43;RPL37;RPS2;RPS11;RPL18;RANBP1;RPL41;SSB;RPS8;RPSA;RPS25;RPS28;RPS29;NUP50;RPL24;RPL26;RPL29;RPS21;RPS24;PPID;RAN;NUP37
DNA replication initiation (GO:0006270)	11/24	1.4186e-06	0.000185618	5.39533	72.6527	ORC5;PRIM2;POLA2;CDC34;ORC6;CDC45;ORC1;PRIM1;POLE2;ORC2;MCM10
anaphase-promoting complex-dependent catabolic process (GO:0031145)	21/79	1.73875e-06	0.000221821	3.12917	41.5001	PSMD10;PSMD12;PSMD11;BUB1B;PSMB10;PSMA7;AURKA;PSMA8;PSMA6;PSMB7;CCNB1;PSMA4;PSMC6;PTTG1;PSMC3;PSME3;CDC27;PSME4;SKP2;ANAPC1;MAD2L1
regulation of G2/M transition of mitotic cell cycle (GO:0010389)	31/149	2.40509e-06	0.000299346	2.44913	31.6867	PSMD10;PSMD12;PSMD11;PINX1;HMMR;PSMB10;PSMA7;AURKA;PSMA8;PSMB7;CCNB1;PRKAR2B;HAUS7;NEK2;CEP192;CEP78;HSP90AA1;CEP135;HAUS3;HAUS6;TUBB4B;TPX2;PSMA6;PSMA4;PSMC6;PSMC3;PSME3;PSME4;ALMS1;FGFR1OP;MAPRE1
mitochondrial translation (GO:0032543)	25/107	2.51887e-06	0.000306043	2.75038	35.4571	MRPS15;GFM1;GFM2;MRPS33;MRPL39;MRPL12;MRPL13;MRPL41;MRPL20;MRPL42;MTRF1;MRPL1;CHCHD1;RARS2;PTCD3;MRPS22;MRPS23;MRPS18B;MRPS21;GATB;MRPL47;MRPL46;MRPS18C;MRPL22;MTRF1L
negative regulation of cell cycle G2/M phase transition (GO:1902750)	19/69	3.02432e-06	0.000358909	3.24146	41.1952	PSMD10;PSMD12;PSMD11;PINX1;BRCA1;BRCC3;PSMB10;PSMA7;CDC14B;AURKA;PSMA8;PSMA6;PSMB7;PSMA4;PSMC6;PSMC3;PSME3;CHEK1;PSME4
mitochondrial translational termination (GO:0070126)	22/89	3.70732e-06	0.000429965	2.90984	36.3881	PTCD3;MRPS15;GFM2;MRPS22;MRPS33;MRPS23;MRPS18B;MRPL39;MRPS21;MRPL47;MRPL12;MRPL46;MRPL13;MRPS18C;MRPL22;MRPL41;MRPL42;MRPL20;MTRF1;MRPL1;CHCHD1;MTRF1L
rRNA pseudouridine synthesis (GO:0031118)	6/8	8.97852e-06	0.00101816	8.82872	102.596	MRPL1;DKC1;RPUSD2;GAR1;NHP2;NOP10
ribosomal small subunit biogenesis (GO:0042274)	14/44	9.67454e-06	0.00107324	3.74552	43.2458	LTV1;NOM1;NPM1;WDR3;RPS27L;RPSA;RPS14;RPS28;LSM6;RPS19;MPHOSPH10;RIOK2;SRFBP1;RPS24
pseudouridine synthesis (GO:0001522)	8/15	9.9629e-06	0.00108172	6.2782	72.3038	PUS10;MRPL1;DKC1;GAR1;NHP2;PUS7;PUS7L;NOP10
DNA-dependent DNA replication (GO:0006261)	16/56	1.07611e-05	0.00114404	3.36332	38.475	GINS1;PRIM2;RFC4;PRIM1;GINS3;MCM10;ORC5;POLA2;CDC34;ORC6;CDC45;RAD51;ORC1;POLE2;ORC2;DNA2
positive regulation of ubiquitin protein ligase activity (GO:1904668)	20/82	1.25511e-05	0.0013071	2.87113	32.4027	PSMD10;PSMD12;PSMD11;BUB1B;PSMB10;PSMA7;CDC14B;PSMA8;PSMA6;PSMB7;CCNB1;PSMA4;PSMC6;PSMC3;PSME3;CDC27;PSME4;FBXO5;ANAPC1;MAD2L1
positive regulation of ubiquitin-protein ligase activity involved in regulation of mitotic cell cycle transition (GO:0051437)	19/76	1.40644e-05	0.00143541	2.94291	32.8778	PSMD10;PSMD12;PSMD11;BUB1B;PSMB10;PSMA7;PSMA8;PSMA6;PSMB7;CCNB1;PSMA4;PSMC6;PSMC3;PSME3;CDC27;PSME4;FBXO5;ANAPC1;MAD2L1
maturation of SSU-rRNA from tricistronic rRNA transcript (SSU-rRNA, 5.8S rRNA, LSU-rRNA) (GO:0000462)	12/35	1.77938e-05	0.00178043	4.03599	44.1402	RPS14;UTP6;TBL3;RPS19;RPS8;UTP23;HEATR1;TSR1;RPSA;NOL10;RPS21;RPS24
translational elongation (GO:0006414)	23/105	1.94123e-05	0.00186907	2.57855	27.9762	PTCD3;MRPS15;GFM1;MRPS22;MRPS33;MRPS23;MRPS18B;MRPL39;MRPS21;MRPL47;MRPL12;MRPL13;MRPL46;MRPS18C;MRPL22;EFTUD2;MRPL41;MRPL20;MRPL42;MRPL1;EEF2K;EEF1D;CHCHD1
nuclear import (GO:0051170)	18/71	1.91275e-05	0.00187707	2.98436	32.4232	RANBP1;IPO11;CSE1L;IPO7;BACH2;IPO8;SNRPD2;SNRPD1;NUP50;SNRPG;GEMIN4;GEMIN5;SNRPE;GEMIN6;SNRPD3;SMN1;KPNB1;RAN
purine nucleobase biosynthetic process (GO:0009113)	5/6	2.45361e-05	0.00231866	9.80969	104.133	PRPS1;MTHFD1L;SHMT1;GMPS;PAICS
maturation of 5.8S rRNA (GO:0000460)	8/17	3.22311e-05	0.00293705	5.53959	57.2937	PES1;MAK16;WDR12;RRP15;SKIV2L2;FTSJ3;RPF1;MPHOSPH6
mitochondrial translational elongation (GO:0070125)	20/87	3.18272e-05	0.00295298	2.70612	28.0224	PTCD3;MRPS15;GFM1;MRPS22;MRPS33;MRPS23;MRPS18B;MRPL39;MRPS21;MRPL47;MRPL12;MRPL46;MRPL13;MRPS18C;MRPL22;MRPL41;MRPL42;MRPL20;MRPL1;CHCHD1
spliceosomal snRNP assembly (GO:0000387)	12/37	3.36569e-05	0.00301317	3.81783	39.3209	PRMT5;SNRPD2;SNRPD1;CLNS1A;SNRPG;GEMIN4;GEMIN5;GEMIN6;SNRPE;SNRPD3;SMN1;SNRPC
mitotic spindle organization (GO:0007052)	18/74	3.49905e-05	0.00307856	2.86337	29.3794	BCCIP;TTK;NDC80;AURKA;CENPE;TPX2;CCNB1;KIF2A;CHEK2;NUF2;RCC1;BIRC5;MYBL2;CEP192;MAP4;KPNB1;RAN;SPC25
tRNA processing (GO:0008033)	16/62	4.33295e-05	0.00374764	3.03784	30.5202	SSB;TRMT10C;POP1;RPP30;NSUN2;DDX1;RPP40;ADAT1;ZBTB8OS;ADAT2;QTRT1;KARS;CLP1;TRMT6;LCMT2;RPP38
mitotic sister chromatid segregation (GO:0000070)	19/82	4.43011e-05	0.00376781	2.72757	27.3426	NAA50;CDCA5;PINX1;NCAPG;CDCA8;TEX14;KIF22;PDS5A;KNSTRN;ZWINT;NDC80;CENPE;CCNB1;KIF18A;KIF2C;NCAPD2;SPDL1;KPNB1;RAN
ribosome assembly (GO:0042255)	15/56	4.66276e-05	0.00390067	3.15312	31.447	NPM1;RPL11;RPS27L;RPSA;RPF2;RPF1;RPS14;MRPL20;RPS28;RPS19;C1QBP;MRTO4;RPL24;BRIX1;MDN1
myeloid cell differentiation (GO:0030099)	13/44	4.84644e-05	0.00392562	3.47798	34.5526	LYN;HSPA9;ALAS2;EPO;ZBTB16;IKZF1;GATA1;TIRAP;KLF1;PRDX3;RPS14;RPS19;CASP3
microtubule cytoskeleton organization involved in mitosis (GO:1902850)	13/44	4.84644e-05	0.00398893	3.47798	34.5526	BCCIP;TTK;NDC80;AURKA;CENPE;CCNB1;KIF2A;NUF2;RCC1;MAP4;KPNB1;RAN;SPC25
regulation of establishment of protein localization to telomere (GO:0070203)	6/10	5.79563e-05	0.00462111	7.06298	68.9051	CCT6A;DKC1;CCT8;TERF1;CCT7;CCT5
regulation of cellular amino acid metabolic process (GO:0006521)	14/51	6.17857e-05	0.00470586	3.23143	31.3185	PSMD10;PSMD12;PSMD11;ODC1;PSMB10;PSMA7;PSMA8;PSMA6;PSMB7;PSMA4;PSMC6;PSMC3;PSME3;PSME4
mitochondrial gene expression (GO:0140053)	13/45	6.28915e-05	0.00471964	3.40069	32.8986	RARS2;PTCD3;MRPS15;PNPT1;GFM2;MRPS18B;GATB;MRPS21;MRPL47;MRPL12;MRPS18C;FASTKD5;TFAM
regulation of cellular amine metabolic process (GO:0033238)	14/51	6.17857e-05	0.00477716	3.23143	31.3185	PSMD10;PSMD12;PSMD11;ODC1;PSMB10;PSMA7;PSMA8;PSMA6;PSMB7;PSMA4;PSMC6;PSMC3;PSME3;PSME4
negative regulation of ubiquitin protein ligase activity (GO:1904667)	18/77	6.16059e-05	0.00483654	2.75181	26.6781	PSMD10;PSMD12;PSMD11;RPL11;BUB1B;PSMB10;PSMA7;PSMA6;PSMB7;CCNB1;PSMA4;PSMC6;PSMC3;PSME3;CDC27;FBXO5;ANAPC1;MAD2L1
negative regulation of ubiquitin-protein ligase activity involved in mitotic cell cycle (GO:0051436)	17/71	7.09133e-05	0.0052445	2.81856	26.9287	PSMD10;PSMD12;PSMD11;BUB1B;PSMB10;PSMA7;PSMA6;PSMB7;CCNB1;PSMA4;PSMC6;PSMC3;PSME3;CDC27;FBXO5;ANAPC1;MAD2L1
tRNA aminoacylation (GO:0043039)	12/40	7.986e-05	0.0058218	3.53149	33.3204	CARS;RARS2;KARS;QARS;PPA1;RARS;TARS;GATB;DARS2;GARS;YARS2;FARSB
maturation of 5.8S rRNA from tricistronic rRNA transcript (SSU-rRNA, 5.8S rRNA, LSU-rRNA) (GO:0000466)	8/19	8.58444e-05	0.00608422	4.95648	46.4074	EXOSC9;PES1;EXOSC8;RPSA;WDR12;RPS21;EXOSC2;FTSJ3
regulation of ubiquitin-protein ligase activity involved in mitotic cell cycle (GO:0051439)	17/72	8.5569e-05	0.00615012	2.77941	26.0325	PSMD10;PSMD12;PSMD11;BUB1B;PSMB10;PSMA7;PSMA6;PSMB7;CCNB1;PSMA4;PSMC6;PSMC3;PSME3;CDC27;FBXO5;ANAPC1;MAD2L1
mRNA splicing, via spliceosome (GO:0000398)	41/261	9.12133e-05	0.00637618	1.84918	17.2017	ISY1;DDX1;PPWD1;U2AF1;YBX1;CWC27;USP39;EFTUD2;SNRPD2;CLP1;SNRPD1;POLR2F;SNRPB2;SNRPD3;SMN1;POLR2H;POLR2K;SF3A3;PRMT5;HSPA8;RBM15;ALYREF;PRPF40A;GTF2F2;LSM3;LSM2;SFPQ;PHF5A;LSM6;CLNS1A;SNRPG;GEMIN4;GEMIN5;PPIH;SNRPE;GEMIN6;SNRPA1;PABPC1;DNAJC8;SNRPC;PPIL3
erythrocyte differentiation (GO:0030218)	11/35	9.87245e-05	0.00680799	3.69966	34.1226	LYN;HSPA9;RPS14;ALAS2;RPS19;EPO;CASP3;IKZF1;GATA1;LYAR;KLF1
positive regulation of protein ubiquitination involved in ubiquitin-dependent protein catabolic process (GO:2000060)	19/87	0.000104264	0.00709411	2.57082	23.5707	PSMD10;PSMD12;PSMD11;BUB1B;PSMB10;PSMA7;PSMA8;PSMA6;PSMB7;CCNB1;PSMA4;PSMC6;PSMC3;PSME3;CDC27;PSME4;FBXO5;ANAPC1;MAD2L1
positive regulation of protein localization to chromosome, telomeric region (GO:1904816)	6/11	0.000118311	0.00794394	6.42089	58.0589	CCT6A;DKC1;CCT8;CCT7;CCT5;GNL3
DNA recombination (GO:0006310)	14/55	0.000150739	0.0098618	2.99642	26.3683	GEN1;BLM;HMGB3;LIG4;NUCKS1;HMGB1;BRCA1;BRCA2;PALB2;RAD51AP1;RAD51;EXO1;RAD54L;DNA2
cellular protein metabolic process (GO:0044267)	65/484	0.000149429	0.00990307	1.5809	13.9257	RPL30;MRPS15;RPL34;RPLP1;CHRDL1;YARS2;RPL7;MRPL41;MRPL42;RPS14;MRPL1;RPS19;CHEK2;RPL36;RPLP2;RPL38;RPL37;RPS11;PSENEN;RPS8;PABPC4;APOA2;MRPS18B;MRPS21;RPSA;MRPS18C;CDC34;ADORA2B;NHP2;RPL24;RPL26;RPL29;MATN3;STOML2;UBA7;MRPS33;RPL11;RPL36A;TARS;HTRA2;CSF2RB;MRPL13;GSPT1;GGA2;GGA3;RPL14;SPP1;EIF4EBP2;ST3GAL6;RPS2;RPL18;RPL41;GOLM1;GATB;WDYHV1;MSRA;RPS25;RSL1D1;RPS28;RPS29;SAA1;RPS21;RPS24;FARSB;MSR…
negative regulation of G2/M transition of mitotic cell cycle (GO:0010972)	15/62	0.000164273	0.0106112	2.84798	24.8172	PSMD10;PSMD12;PSMD11;PINX1;PSMB10;PSMA7;AURKA;PSMA8;PSMA6;PSMB7;PSMA4;PSMC6;PSMC3;PSME3;PSME4
negative regulation of G0 to G1 transition (GO:0070317)	11/37	0.000172644	0.0108766	3.49967	30.3221	UXT;PCGF6;L3MBTL2;RRM2;CBX5;RAD51;TFDP1;CHEK1;BRCA1;RBBP7;YAF2
mitotic metaphase plate congression (GO:0007080)	12/43	0.000172583	0.0110087	3.28511	28.4642	CENPE;CCNB1;KIF18A;CDCA5;PINX1;NUF2;CDCA8;KIF2C;SPDL1;KIF22;NDC80;KPNB1
regulation of transcription involved in G1/S transition of mitotic cell cycle (GO:0000083)	9/26	0.000185627	0.0115519	4.0748	35.0097	DHFR;PCNA;CDC45;RRM2;TFDP1;ORC1;CCNE1;FBXO5;CDC6
positive regulation of transcription from RNA polymerase I promoter (GO:0045943)	8/21	0.00019806	0.0118906	4.48443	38.2385	IPPK;DHX33;DDX11;NCL;RASL11A;HEATR1;WDR75;WDR43
positive regulation of protein localization to Cajal body (GO:1904871)	5/8	0.000197909	0.012023	7.35727	62.7406	CCT3;CCT6A;CCT8;CCT7;CCT5
regulation of protein localization to Cajal body (GO:1904869)	5/8	0.000197909	0.0121678	7.35727	62.7406	CCT3;CCT6A;CCT8;CCT7;CCT5
metaphase plate congression (GO:0051310)	12/44	0.000219128	0.0130024	3.21044	27.0507	CENPE;CCNB1;KIF18A;CDCA5;PINX1;CDCA8;KIF2C;SPDL1;KIF22;CENPQ;NDC80;KPNB1
telomere maintenance via telomere lengthening (GO:0010833)	9/27	0.000257572	0.0151079	3.92388	32.4277	DCLRE1B;HSP90AA1;RAD51;DKC1;PINX1;GAR1;NHP2;TERF1;NOP10
regulation of G0 to G1 transition (GO:0070316)	11/39	0.000288882	0.0163796	3.3202	27.058	UXT;PCGF6;L3MBTL2;RRM2;CBX5;RAD51;TFDP1;CHEK1;BRCA1;RBBP7;YAF2
rRNA modification (GO:0000154)	8/22	0.000288158	0.0165221	4.28059	34.8954	FBL;NOP58;MRPL1;DKC1;GAR1;NHP2;NOP10;FTSJ3
regulation of DNA recombination (GO:0000018)	10/33	0.000285533	0.0165577	3.56716	29.1121	RAD51AP1;BLM;RAD51;FIGNL1;ALYREF;CHEK1;THOC1;FIGNL2;FIGN;KPNA2
tRNA aminoacylation for protein translation (GO:0006418)	12/46	0.000344779	0.0193342	3.07086	24.4828	CARS;RARS2;KARS;QARS;PPA1;RARS;MRPL39;TARS;DARS2;GARS;YARS2;FARSB
positive regulation of establishment of protein localization to telomere (GO:1904851)	5/9	0.000414064	0.0227201	6.53979	50.9417	CCT6A;DKC1;CCT8;CCT7;CCT5
RNA splicing, via transesterification reactions with bulged adenosine as nucleophile (GO:0000377)	36/236	0.000422468	0.0229346	1.79567	13.9513	ISY1;PPWD1;U2AF1;YBX1;CWC27;USP39;EFTUD2;SNRPD2;CLP1;SNRPD1;POLR2F;SNRPB2;SNRPD3;POLR2H;POLR2K;SF3A3;HSPA8;RBM15;ALYREF;PRPF40A;GTF2F2;LSM3;LSM2;SFPQ;PHF5A;LSM6;SNRPG;GEMIN5;PPIH;SNRPE;GEMIN6;SNRPA1;PABPC1;DNAJC8;SNRPC;PPIL3
maturation of LSU-rRNA from tricistronic rRNA transcript (SSU-rRNA, 5.8S rRNA, LSU-rRNA) (GO:0000463)	5/9	0.000414064	0.022967	6.53979	50.9417	PES1;RPF2;WDR12;FTSJ3;RPL7
tRNA metabolic process (GO:0006399)	7/18	0.000433378	0.0232792	4.57786	35.4505	SSB;KARS;POP1;RPP30;ADAT1;DARS2;YARS2
antigen processing and presentation of exogenous peptide antigen via MHC class I, TAP-dependent (GO:0002479)	16/75	0.000472321	0.0251068	2.51128	19.231	PSMD10;PSMD12;PSMD11;NCF1;NCF4;PSMB10;PSMA7;PSMA8;PSMA6;PSMB7;PSMA4;PSMC6;PSMC3;PSME3;PSME4;VAMP3
regulation of cellular ketone metabolic process (GO:0010565)	14/61	0.000481263	0.0253184	2.70169	20.6384	PSMD10;PSMD12;PSMD11;ODC1;PSMB10;PSMA7;PSMA8;PSMA6;PSMB7;PSMA4;PSMC6;PSMC3;PSME3;PSME4
mRNA processing (GO:0006397)	41/283	0.000523863	0.0272783	1.70543	12.8833	ISY1;RNMT;PPWD1;U2AF1;YBX1;CWC27;USP39;EFTUD2;SNRPD2;CLP1;SNRPD1;POLR2F;SNRPB2;SNRPD3;POLR2H;POLR2K;SF3A3;HSPA8;RBM15;ALYREF;THOC1;PRPF40A;GTF2H3;GTF2F2;THOC7;LSM3;LSM2;KIN;SFPQ;PHF5A;LSM6;SNRPG;GEMIN5;PPIH;SNRPE;GEMIN6;SNRPA1;PABPC1;DNAJC8;SNRPC;PPIL3
regulation of translation (GO:0006417)	33/213	0.00054338	0.0280088	1.82377	13.7106	TRIM71;NUP205;SHMT1;FMR1;DDX1;NOLC1;RPS27L;AAAS;RPS6KA3;IPO8;MTRF1;IGF2BP1;POLR2F;NUP43;POLR2H;EIF4E;POLR2K;EIF2B4;NPM1;LARP4;EIF1;DHFR;EIF5;NCL;NUP50;GEMIN5;ETF1;EIF3E;RPL26;GAPDH;RAN;TNRC6A;NUP37
regulation of posttranscriptional gene silencing (GO:0060147)	13/55	0.00056128	0.0280805	2.78239	20.827	TRIM71;NUP205;FMR1;AAAS;IPO8;NUP50;POLR2F;NUP43;POLR2H;POLR2K;TNRC6A;RAN;NUP37
proteasomal ubiquitin-independent protein catabolic process (GO:0010499)	8/24	0.000568279	0.0281546	3.92388	29.3227	PSMA6;PSMB7;PSMA4;PSME4;PSMA7;PSMB10;PSMA8;NFE2L2
regulation of hematopoietic stem cell differentiation (GO:1902036)	16/76	0.000551823	0.0281595	2.47824	18.5924	PSMD10;PSMD12;FOXC1;SPI1;PSMD11;GATA1;PSMB10;PSMA7;PSMA8;PSMA6;PSMB7;PSMA4;PSMC6;PSMC3;PSME3;PSME4
regulation of gene silencing by RNA (GO:0060966)	13/55	0.00056128	0.0283586	2.78239	20.827	TRIM71;NUP205;FMR1;AAAS;IPO8;NUP50;POLR2F;NUP43;POLR2H;POLR2K;TNRC6A;RAN;NUP37
replication fork processing (GO:0031297)	9/30	0.000622701	0.0296976	3.53149	26.0675	BLM;PCNA;RAD51;EME1;ALYREF;DDX11;THOC1;NUCKS1;BRCA2
regulation of cell cycle G2/M phase transition (GO:1902749)	17/84	0.00060817	0.0298412	2.38235	17.6415	HSP90AA1;NPM1;CEP135;HAUS3;HAUS6;HMMR;TUBB4B;AURKA;TPX2;HAUS7;PRKAR2B;ALMS1;FGFR1OP;NEK2;CEP192;MAPRE1;CEP78
hydrogen peroxide catabolic process (GO:0042744)	6/14	0.000614868	0.0298826	5.04498	37.3031	PRDX3;GPX1;GPX3;PRDX1;MPO;PRDX6
ribosomal large subunit assembly (GO:0000027)	9/30	0.000622701	0.0299778	3.53149	26.0675	DHX30;MRPL20;RPL11;MRTO4;RPL24;BRIX1;RPF2;MDN1;RPF1
folic acid metabolic process (GO:0046655)	7/19	0.000636107	0.0300561	4.33692	31.9203	DHFR;MTRR;MTHFD1L;SHMT2;MTHFD2;SHMT1;SLC19A1
regulation of hematopoietic progenitor cell differentiation (GO:1901532)	16/77	0.000642507	0.03008	2.44605	17.9788	PSMD10;PSMD12;FOXC1;SPI1;PSMD11;GATA1;PSMB10;PSMA7;PSMA8;PSMA6;PSMB7;PSMA4;PSMC6;PSMC3;PSME3;PSME4
snRNA modification (GO:0040031)	4/6	0.000676751	0.0308345	7.84775	57.2745	MRPL1;DKC1;NHP2;NOP10
tRNA catabolic process (GO:0016078)	4/6	0.000676751	0.0311122	7.84775	57.2745	POP1;EXOSC9;EXOSC8;EXOSC2
protein localization to nucleolus (GO:1902570)	4/6	0.000676751	0.0313951	7.84775	57.2745	PINX1;NOL8;RPF2;RAN
DNA repair (GO:0006281)	41/288	0.00074776	0.0334721	1.67582	12.0633	DCLRE1B;FEN1;BLM;PCNA;CDCA5;DDX1;NUCKS1;BRCC3;BRCA1;HMGB1;BRCA2;PDS5A;RAD51AP1;SLX4;EME1;EXO1;CHEK2;CHEK1;RAD54L;FANCI;NPM1;RFC4;LIG1;USP45;HUS1;LIG4;HMGA2;FANCB;GTF2H3;PALB2;RAD51;RPA3;APEX1;POLE2;PSME4;UBE2U;ERCC8;DNA2;TRIP13;UBE2V1;CUL4B
antigen processing and presentation of exogenous peptide antigen via MHC class I (GO:0042590)	16/78	0.000745618	0.0336716	2.41469	17.3889	PSMD10;PSMD12;PSMD11;NCF1;NCF4;PSMB10;PSMA7;PSMA8;PSMA6;PSMB7;PSMA4;PSMC6;PSMC3;PSME3;PSME4;VAMP3
protein peptidyl-prolyl isomerization (GO:0000413)	10/37	0.000785329	0.0345477	3.18152	22.746	FKBP11;PPIF;PPWD1;PPIH;CWC27;PPIL3;FKBP4;FKBP3;PPID;FKBP5
double-strand break repair (GO:0006302)	24/141	0.000782057	0.0347029	2.00368	14.3335	DCLRE1B;GEN1;BLM;FEN1;CDCA5;DDX1;HUS1;LIG4;NUCKS1;BRCC3;BRCA1;BRCA2;PALB2;RAD51AP1;SFPQ;SLX4;RAD51;EME1;CHEK2;RPA3;AUNIP;DNA2;TRIP13;NHEJ1
telomere maintenance via telomerase (GO:0007004)	7/20	0.000907313	0.0392375	4.12007	28.8612	HSP90AA1;DKC1;PINX1;GAR1;NHP2;TERF1;NOP10
hydrogen peroxide metabolic process (GO:0042743)	7/20	0.000907313	0.0395728	4.12007	28.8612	PRDX3;GPX1;GPX3;PRDX1;MPO;PRDX6;SOD1
regulation of mitotic sister chromatid separation (GO:0010965)	6/15	0.0009514	0.0407983	4.70865	32.7608	CENPE;PTTG1;CDC27;RIOK2;CDC6;ANAPC1
mitochondrial transport (GO:0006839)	23/135	0.000982434	0.041778	2.00554	13.8893	HSP90AA1;STOML2;PNPT1;HSPA4;TIMM9;TIMM23;TIMM10;DNAJC15;COX5B;ATP5G1;ATP5J2;HSPD1;CHCHD4;SLC25A37;PITRM1;PPIF;SLC25A30;SLC25A21;BAK1;SLC25A5;SLC25A4;SLC25A22;TOMM5
Early Ect
Term	Overlap	P-value	Adjusted P-value	Odds Ratio	Combined Score	Genes
carbohydrate catabolic process (GO:0016052)	8/35	1.16573e-05	0.0594873	7.13171	81.0132	NEU3;LDHA;PFKL;TPI1;PKM;PGK1;ALDOA;DERA
ATP generation from ADP (GO:0006757)	6/24	8.69747e-05	0.147944	7.80031	72.9321	PFKL;LDHA;TPI1;PKM;PGK1;ALDOA
glycolytic process (GO:0006096)	6/23	6.70383e-05	0.171048	8.13946	78.2222	LDHA;PFKL;TPI1;PKM;PGK1;ALDOA
gonad development (GO:0008406)	8/49	0.000150491	0.191988	5.09408	44.8361	FGF8;SIX4;WT1;NCOA4;NR0B1;LRP2;GATA3;UTF1
regulation of T cell differentiation in thymus (GO:0033081)	4/12	0.000421315	0.307139	10.4004	80.8334	SHH;VNN1;CAMK4;FOXJ1
nucleoside phosphate catabolic process (GO:1901292)	3/6	0.000609576	0.311067	15.6006	115.487	ENPP1;ENPP3;NUDT15
nicotinamide nucleotide metabolic process (GO:0046496)	7/45	0.000528745	0.337273	4.85353	36.6199	LDHA;PFKL;TPI1;PKM;PGK1;NMNAT2;ALDOA
development of primary male sexual characteristics (GO:0046546)	7/43	0.000396824	0.337499	5.07927	39.781	SIX4;WT1;NCOA4;NR0B1;LRP2;GATA3;UTF1
lipoprotein catabolic process (GO:0042159)	3/6	0.000609576	0.34563	15.6006	115.487	LYPLA2;LYPLA1;LYPLAL1
male gonad development (GO:0008584)	7/43	0.000396824	0.404999	5.07927	39.781	SIX4;WT1;NCOA4;NR0B1;LRP2;GATA3;UTF1
NE
Term	Overlap	P-value	Adjusted P-value	Odds Ratio	Combined Score	Genes
regulation of calcium ion-dependent exocytosis (GO:0017158)	14/53	1.80999e-06	0.00461819	4.42464	58.5034	SYT5;SYT4;SYT3;SYT2;DOC2A;SYT13;SYT9;SYN1;SCAMP5;RIMS2;RIMS4;RIMS3;SYT11;STX1A
nervous system development (GO:0007399)	54/455	1.1226e-06	0.00572862	1.98796	27.2348	ACHE;PPP1R17;DOC2A;MYT1L;GDA;STMN3;NR2E1;DMBX1;SOX3;NAGLU;DPYSL5;DNER;NRCAM;CHAC1;EPHB1;CHST8;SRRM4;PAX6;NRG1;GFRA1;ALDH3A2;ALDH5A1;KCNQ2;HAP1;RAPGEF5;DSCAML1;GPM6A;IGSF8;CHRNA3;DLX5;DLX6;NRXN1;NRXN2;ASCL1;NPAS1;NPAS2;PCDH17;NEUROD1;NHLH2;NHLH1;DVL1;PCDHA9;ASIC2;HES5;PCDH8;L1CAM;FGF17;NELL1;NFASC;APBA1;SERPINI1;APBA2;NEUROG1;FGF12
cell morphogenesis involved in neuron differentiation (GO:0048667)	19/97	3.89849e-06	0.00663134	3.28101	40.8647	LINGO2;BRSK1;SPTBN4;BRSK2;RAB3A;LINGO3;DCC;ATL1;MAPK8IP2;MAP2;EPYC;MAP1B;CDHR1;DVL1;MAP6;NRCAM;APBB1;PAK3;DSCAML1
atrial cardiac muscle cell action potential (GO:0086014)	6/13	5.33123e-05	0.0680132	7.73096	76.0676	KCNJ5;KCNA5;KCNN2;SCN5A;SCN3B;KCNJ3
axon development (GO:0061564)	16/94	0.000131027	0.111439	2.85114	25.4895	LINGO2;SPTBN4;BRSK1;BRSK2;RAB3A;LINGO3;DCC;AMIGO1;ATL1;L1CAM;EPYC;MAP1B;NRCAM;APBB1;PAK3;DSCAML1
chemical synaptic transmission (GO:0007268)	34/289	0.000124434	0.126997	1.97064	17.7194	NAPB;SNAP25;CHRNA3;DOC2A;NRXN1;SLC1A1;CHRNA9;NRXN2;CDH8;CHRND;KCNN1;SLC17A6;SLC17A7;BSN;ASIC2;NPTX2;UNC13B;CHRNB2;SYT5;RIC3;CHRNB1;UNC13A;DTNA;KCND2;GAD2;SYN2;SYN1;SHISA6;OMP;KCNQ2;APBA1;AMPH;HAP1;APBA2
regulation of synaptic vesicle cycle (GO:0098693)	5/11	0.000256529	0.130907	7.61383	62.9532	RIMS2;RIMS4;RIMS3;SYN1;SNCA
regulation of synaptic vesicle exocytosis (GO:2000300)	6/17	0.000312591	0.145014	5.91191	47.7128	RIMS2;NAPB;RIMS4;RAB3A;RIMS3;SYN1
regulation of short-term neuronal synaptic plasticity (GO:0048172)	5/11	0.000256529	0.145452	7.61383	62.9532	RAB3A;SYP;SHISA7;SHISA6;SLC8A2
regulation of catecholamine secretion (GO:0050433)	7/22	0.000204678	0.14921	5.32968	45.2707	CHRNB2;CHGA;SYT4;HRH3;FGF20;STX1A;SNCA
regulation of regulated secretory pathway (GO:1903305)	9/37	0.000253992	0.162015	4.07443	33.7289	SYT5;SYT4;SYT3;RAB3A;SYT2;DOC2A;SYT11;SYT13;SYT9
regulation of synaptic vesicle transport (GO:1902803)	5/13	0.000646205	0.25366	6.44247	47.316	RIMS2;RIMS4;RIMS3;SYN1;SNCA
positive regulation of developmental growth (GO:0048639)	10/51	0.000749879	0.273331	3.2844	23.6332	RIMS2;SYT4;SYT3;UNC13A;SYT2;RUFY3;AGR2;ISLR2;L1CAM;NTN1
synaptic vesicle cycle (GO:0099504)	5/13	0.000646205	0.274799	6.44247	47.316	RAB3A;SYNDIG1;SLC17A6;SLC17A7;PLD2
regulation of synapse assembly (GO:0051963)	8/35	0.000872316	0.296762	3.82867	26.9705	CHRNB2;CUX2;NRXN1;CLSTN1;SYNDIG1;RAB17;EPHB1;SNCA

## Sheet: GO_Molecular_Function_2018
Curated Late
Term	Overlap	P-value	Adjusted P-value	Old P-value	Old Adjusted P-value	Odds Ratio	Combined Score	Genes
transcriptional repressor activity, RNA polymerase II transcription regulatory region sequence-specific binding (GO:0001227)	15/159	0.000431123	0.496223	0	0	2.72264	21.0981	IRX1;CEBPB;DLX4;BCL11A;ARID5A;BHLHE41;MITF;NR1D1;FOXO3;ZBTB4;ETS2;NFKB1;RBL2;BHLHE40;MZF1
transcription factor activity, RNA polymerase II core promoter proximal region sequence-specific binding (GO:0000982)	21/280	0.000800505	0.460691	0	0	2.1645	15.4335	FOXA1;CEBPB;HLF;BCL11B;DLX4;BCL11A;BHLHE41;MITF;NR1D1;GRHL1;KLF4;ETS2;NFKB2;RBL2;NR4A1;KLF6;NR4A3;ELF4;BHLHE40;MZF1;SSBP2
Pan Ect
Term	Overlap	P-value	Adjusted P-value	Odds Ratio	Combined Score	Genes
semaphorin receptor binding (GO:0030215)	11/18	1.04826e-06	0.00120655	5.08412	70.0001	SEMA4A;SEMA4D;SEMA3C;SEMA3D;SEMA4B;SEMA3A;SEMA3B;SEMA3E;PLXNB1;SEMA3F;SEMA4G
neuropilin binding (GO:0038191)	11/19	2.21808e-06	0.0012765	4.81653	62.7058	SEMA4A;SEMA5B;SEMA4D;SEMA3C;SEMA3D;SEMA4B;SEMA3A;SEMA3B;SEMA3E;SEMA3F;SEMA4G
protein binding involved in heterotypic cell-cell adhesion (GO:0086080)	6/7	1.88366e-05	0.00722696	7.13097	77.5829	DSP;CXADR;JUP;PKP2;DSG2;DSC2
frizzled binding (GO:0005109)	14/37	5.19715e-05	0.0149548	3.14791	31.0535	RNF43;WNT10B;WNT10A;RYK;WNT3A;WNT7B;PTCH1;PTCH2;WNT9B;WNT7A;WNT6;ZNRF3;WNT3;WNT4
cadherin binding involved in cell-cell adhesion (GO:0098641)	9/19	0.000153599	0.0353584	3.9408	34.6048	PDLIM1;ANXA1;EPCAM;TRIM29;TACSTD2;PKP3;BAIAP2;PDLIM5;S100A11
cadherin binding (GO:0045296)	59/313	0.000287021	0.0550601	1.56821	12.7902	LAD1;DOCK9;F11R;LASP1;SLK;CDH3;TRIM29;CDH1;PPP1R13L;LRRFIP1;MB21D2;TBC1D10A;MKL2;ANXA1;ARHGEF16;ANK3;CD2AP;PLCB3;TMEM2;TBC1D2;PKP2;PLIN3;CDH13;MYH9;ITGA6;PKP3;EZR;EPHA2;PLEC;SRC;TACSTD2;CAPG;IQGAP1;PPL;EVPL;EGFR;FAM129B;PDLIM1;EPCAM;BAG3;COBLL1;MICALL1;PAK6;EPS8L1;SFN;EPS8L2;PDLIM5;PAK2;S100A11;SPTBN2;JUP;CGN;BAIAP2;MPP7;KTN1;PPFIBP1;CTNNB1;HSPA1A;TJP2
Rho guanyl-nucleotide exchange factor activity (GO:0005089)	17/59	0.000413609	0.0595079	2.39713	18.6751	VAV3;ARHGEF37;ARHGEF17;ARHGEF16;ARHGEF19;ARHGEF18;VAV2;FGD2;FGD3;TIAM1;FGD4;DNMBP;ARHGEF3;ARHGEF4;EPS8L1;EPS8L2;ARHGEF5
protein binding involved in cell-cell adhesion (GO:0098632)	9/21	0.000390287	0.0641743	3.56549	27.9842	PDLIM1;ANXA1;EPCAM;TRIM29;TACSTD2;PKP3;BAIAP2;PDLIM5;S100A11
Late Mes
Term	Overlap	P-value	Adjusted P-value	Odds Ratio	Combined Score	Genes
integrin binding (GO:0005178)	27/94	1.75657e-06	0.00202182	2.62314	34.7623	SEMA7A;COL16A1;ADAM22;THY1;FGF2;THBS1;CYR61;FBLN5;ADAMTS5;IBSP;ADAM23;TSPAN4;MADCAM1;S1PR3;LGALS8;ADAMTS8;EGFL6;VCAM1;FN1;PRKCA;COL3A1;SFRP2;CXCL12;ADAM15;COL5A1;ITGB1BP1;FBN1
neurotransmitter receptor activity involved in regulation of postsynaptic membrane potential (GO:0099529)	10/21	2.73662e-05	0.0104995	4.34877	45.6891	GABRA1;GRID1;GABRA4;GRIK5;GRIK3;GRIK4;GRIK1;GABRE;GRIA3;GRIA4
calcium ion binding (GO:0005509)	54/284	3.66617e-05	0.0105494	1.73645	17.7357	RET;RYR2;SPARC;IHH;PKD2;RYR3;SLC8A1;CDH7;PPP3CA;CDH4;CDH2;NCS1;ARSA;TNNC1;TNNC2;EML1;SYTL4;ASPN;PITPNM1;STIM1;TNNT2;CDH10;PLSCR4;CDH11;CDH12;CASQ2;SPARCL1;FKBP9;DNASE1L2;S100A9;S100A8;CDH18;SLC24A3;LRP1;ITPR2;FBLN1;NOL3;THBS1;CAMKK2;THBS3;SRR;SCIN;CDH20;S100A13;PCDHA4;SPOCK1;SLIT3;SLIT2;GSN;SYT16;S100B;PCDHB6;PCDHB8;FBN1
collagen binding (GO:0005518)	17/52	2.24172e-05	0.0129011	2.9856	31.9629	ITGB1;LRRC15;SPARC;COL14A1;LUM;FN1;MMP9;NID2;THBS1;CTSS;MRC2;C1QTNF1;CTSK;ITGA10;ITGA11;SERPINH1;SPARCL1
glutamate receptor activity (GO:0008066)	9/20	0.000120977	0.0198921	4.10959	37.0681	GRM7;GRID1;GRIK5;GRIK3;GRIK4;GRIK1;GRIA3;GRIN2D;GRIA4
ionotropic glutamate receptor activity (GO:0004970)	8/16	0.000116713	0.0223894	4.56621	41.3507	GRIN3A;GRIK5;GRIK3;GRIK4;GRIK1;GRIA3;GRIN2D;GRIA4
transmitter-gated ion channel activity (GO:0022824)	12/33	0.000112567	0.025913	3.32088	30.1933	GABRA1;GABRB1;GRID1;GRIK5;GABRA4;GRIK3;GRIK4;GRIK1;GABRE;GRIA3;GRIA4;GRIN2D
prostaglandin receptor activity (GO:0004955)	6/10	0.00024313	0.0349803	5.47945	45.5995	PTGER4;PTGFR;PTGIR;PTGER1;PTGER2;PTGER3
platelet-derived growth factor binding (GO:0048407)	6/11	0.000485242	0.0558514	4.98132	38.0118	COL1A1;PDGFRB;COL3A1;COL1A2;COL5A1;COL6A1
3',5'-cyclic-AMP phosphodiesterase activity (GO:0004115)	7/15	0.000542018	0.0567148	4.2618	32.0496	PDE1B;PDE1A;PDE2A;PDE4B;PDE3A;PDE7B;PDE8A
metalloendopeptidase activity (GO:0004222)	17/65	0.000478023	0.0611339	2.38848	18.262	MME;MMP2;ADAM33;ADAMTS12;MMP9;ADAMTS5;MMP11;ADAMTS2;MMP14;BMP1;MMP16;ADAM15;PAPPA;TLL1;TRABD2B;ADAMTS7;PAPPA2
arylsulfatase activity (GO:0004065)	6/12	0.000880619	0.0779687	4.56621	32.1228	ARSA;ARSJ;ARSK;ARSI;ARSB;SULF2
sulfuric ester hydrolase activity (GO:0008484)	7/16	0.000872813	0.0837173	3.99543	28.143	ARSA;ARSJ;ARSK;IDS;ARSI;ARSB;SULF2
Pan Mes
Term	Overlap	P-value	Adjusted P-value	Odds Ratio	Combined Score	Genes
sialyltransferase activity (GO:0008373)	8/21	8.13822e-08	9.36709e-05	12.87	210.092	ST8SIA1;ST8SIA4;ST3GAL4;ST6GALNAC3;ST6GALNAC4;ST3GAL1;ST3GAL2;ST6GALNAC6
integrin binding (GO:0005178)	13/94	3.93293e-06	0.0022634	4.67223	58.1511	VWF;ITGB3;ACTN1;ICAM2;ADAM11;IGF1;ESM1;KDR;EMILIN1;LCP1;S1PR2;CALR;FERMT3
vascular endothelial growth factor receptor binding (GO:0005172)	4/9	8.50445e-05	0.0195772	15.015	140.726	ITGB3;VEGFB;VEGFC;ITGA5
transmembrane receptor protein kinase activity (GO:0019199)	9/62	8.21949e-05	0.0236516	4.9041	46.13	ACVRL1;PDGFRA;CSF1R;FLT4;TIE1;KDR;ROR2;TEK;DDR2
protein kinase binding (GO:0019901)	31/495	7.9334e-05	0.0304378	2.11575	19.9766	ACVRL1;CSF1R;SHC1;FLT4;PLEK;TWF2;WAS;RHOBTB1;ACTB;HDAC7;KDR;RAC2;DACT3;CSK;DACT1;SPAG9;PDGFRA;TIE1;MSN;RHOC;DNM1;PJA2;KCNQ1;RHOJ;HCLS1;CALM3;ROR2;TEK;LAT;LIMS1;DDR2
protein homodimerization activity (GO:0042803)	37/664	0.000185801	0.0356428	1.88253	16.1725	CAMK2B;CSF1R;GYPC;HPGD;FLT4;PLEK;CAMK2A;PDGFB;SLC4A1;ABAT;CORO1A;CDH6;CD79B;CDH5;STK10;HMGCL;HHEX;GLIPR2;HMOX1;PIP4K2B;PDLIM4;PDGFRA;TRPC6;FCER1G;VWF;AADAT;ACTN1;TCF12;TPD52L1;TPST1;DPYD;PECAM1;TCF4;PLCB1;DDR2;ABCG2;CDH19
alpha-N-acetylgalactosaminide alpha-2,6-sialyltransferase activity (GO:0001665)	3/6	0.000482717	0.0505098	16.8919	128.988	ST6GALNAC3;ST6GALNAC4;ST6GALNAC6
vascular endothelial growth factor receptor 2 binding (GO:0043184)	3/6	0.000482717	0.0555607	16.8919	128.988	ITGB3;VEGFB;ITGA5
GTPase regulator activity (GO:0030695)	19/275	0.000579824	0.0556148	2.33415	17.3959	GPSM1;WAS;ARHGAP18;ARAP3;ARHGAP28;AXIN2;RASGRP3;SYDE1;ARHGAP42;ARHGAP31;WNT11;DLC1;ADPRH;TBC1D13;RGS10;RAPGEF2;CDC42EP1;NCKAP1L;PLCB1
platelet-derived growth factor receptor binding (GO:0005161)	4/13	0.000439034	0.0561476	10.395	80.3631	PDGFRA;ITGB3;PDGFB;ITGA5
mitogen-activated protein kinase kinase binding (GO:0031434)	8/65	0.000642626	0.0568971	4.158	30.5611	PDGFRA;CSF1R;FLT4;TIE1;KDR;ROR2;TEK;DDR2
vascular endothelial growth factor-activated receptor activity (GO:0005021)	3/7	0.000826179	0.0594333	14.4788	102.78	PDGFRA;FLT4;KDR
actin monomer binding (GO:0003785)	5/25	0.000726026	0.0596897	6.75676	48.8373	LIMA1;NOS3;TWF2;CORO1A;TMSB10
protein tyrosine kinase activity (GO:0004713)	13/147	0.000436881	0.0628562	2.98768	23.1123	PDGFRA;CSF1R;FLT4;TIE1;SLA;GRAP2;KDR;BTK;CSK;ROR2;GRAP;TEK;DDR2
beta-galactoside (CMP) alpha-2,3-sialyltransferase activity (GO:0003836)	3/7	0.000826179	0.0633955	14.4788	102.78	ST3GAL4;ST3GAL1;ST3GAL2
transmembrane receptor protein tyrosine kinase activity (GO:0004714)	8/61	0.000415735	0.0683588	4.43066	34.4947	PDGFRA;CSF1R;FLT4;TIE1;KDR;ROR2;TEK;DDR2
Early Mes
Term	Overlap	P-value	Adjusted P-value	Odds Ratio	Combined Score	Genes
RNA binding (GO:0003723)	243/1387	3.0741e-29	3.53829e-26	2.06237	135.399	RPL30;POP1;RTCA;RPL34;GPATCH4;ADARB1;ENO1;NOC2L;NUDT5;RPL7;RRP9;RPS14;SNRPD2;RPS19;SNRPD1;RPL36;RPL38;DENR;SNRPD3;RPL37;SOX9;RPS11;DDX18;DDX11;DNTTIP2;WDR75;IMP4;GTPBP4;KARS;CLNS1A;SUB1;GRWD1;CCDC86;RPL24;TFAM;SRFBP1;RPL26;RPL29;PFN1;ANP32A;PRKRIP1;NOLC1;NMD3;MRPL12;MRPL13;SAMSN1;GSPT1;MTDH;MRPL20;DHX30;DHX33;PCBP3;PCBP4;PRDX1;GAR1;MAP4;LYAR;RBM10;RPL41;PNO1;MYO5A;PA2G4;LARP4;EIF1;MRPL22;MANF;DHF…
snoRNA binding (GO:0030515)	16/30	3.16062e-10	1.81894e-07	6.2782	137.336	NOP58;UTP6;WDR3;HEATR1;DDX21;IMP4;NUDT5;RRP9;BYSL;TBL3;MRPL1;DKC1;GAR1;NHP2;TSR1;NOP10
mRNA 5'-UTR binding (GO:0048027)	11/22	4.70475e-07	0.000180506	5.88582	85.7535	RSL1D1;RPS14;RPL41;FMR1;SHMT1;NCL;UTP23;IGF2BP1;RPL26;CCT5;GNL3
DNA replication origin binding (GO:0003688)	8/12	9.67693e-07	0.000278454	7.84775	108.678	ORC5;ORC6;CDC45;DDX11;GRWD1;ORC2;MCM10;HSPD1
translation factor activity, RNA binding (GO:0008135)	19/67	1.86186e-06	0.0004286	3.33822	44.0443	EIF5A;EIF2B5;EIF2B4;GFM1;EIF2B3;GFM2;GATB;GTF2H3;EIF2S2;EIF2S1;EIF1;EIF3M;EEF2K;EIF5;EEF1D;DENR;ETF1;EIF3E;EIF4E
translation initiation factor activity (GO:0003743)	11/36	0.000131323	0.0251922	3.59689	32.1484	EIF2B5;EIF2B4;EIF2B3;EIF3M;EIF5;DENR;EIF3E;EIF2S2;EIF4E;EIF2S1;EIF1
RNA polymerase I activity (GO:0001054)	6/12	0.000219589	0.0361067	5.88582	49.5807	ZNRD1;TWISTNB;POLR1E;POLR2F;POLR2H;POLR2K
aminoacyl-tRNA ligase activity (GO:0004812)	11/41	0.00046494	0.0668932	3.15824	24.2351	CARS;RARS2;KARS;QARS;RARS;MRPL39;TARS;DARS2;GARS;YARS2;FARSB
protein transporter activity (GO:0008565)	16/80	0.000994575	0.0953963	2.35433	16.2759	IPO11;RAMP3;CSE1L;TIMM9;TIMM10;DNAJC15;RANBP6;IPO7;IPO5;IPO8;RAP1A;RANGRF;TNPO1;KPNA2;KPNB1;TOMM5
ATPase activity, coupled (GO:0042623)	18/94	0.000849745	0.0978057	2.25414	15.9381	HSPA9;HSPA8;BLM;HSPA4;DDX11;DDX1;FIGNL2;FIGN;TTF2;GTF2H3;KIF18A;HSPH1;PSMC6;RAD51;PSMC3;KATNAL2;FIGNL1;CCT8
NADPH binding (GO:0070402)	5/10	0.000770173	0.0984966	5.88582	42.1948	DHFR;MTRR;HMGCR;CRYZ;DECR1
peptidyl-prolyl cis-trans isomerase activity (GO:0003755)	10/38	0.000985632	0.103133	3.0978	21.4437	FKBP11;PPIF;PPWD1;PPIH;CWC27;PPIL3;FKBP4;FKBP3;PPID;FKBP5
Early Ect
Term	Overlap	P-value	Adjusted P-value	Odds Ratio	Combined Score	Genes
tropomyosin binding (GO:0005523)	43935	4/14	0.931745	8.91464	63.4641	TNNT3;LMOD1;S100A6;LMOD2
NE
Term	Overlap	P-value	Adjusted P-value	Odds Ratio	Combined Score	Genes
amyloid-beta binding (GO:0001540)	13/49	4.00189e-06	0.00460617	4.44399	55.2332	ACHE;TGFB2;CLSTN1;APOA1;ATP1A3;ADRB2;MAPK8IP2;CLU;GSAP;APBA1;CD36;APBB1;APBA2
ligand-gated cation channel activity (GO:0099094)	11/60	0.000752921	0.216653	3.07091	22.0846	CHRNB2;CHRNB1;CHRND;KCNJ5;CHRNA3;KCNJ11;SCNN1A;CHRNA9;ASIC2;ASIC1;KCNJ3
syntaxin binding (GO:0019905)	13/77	0.000591376	0.226891	2.82799	21.0206	UNC13B;SYT5;SNAP25;NAPB;SYT4;SYT3;UNC13A;SYT2;DOC2A;SYT13;SYT9;SNPH;SYT11
ankyrin binding (GO:0030506)	6/18	0.000445305	0.256273	5.58347	43.0863	SPTBN4;KCNJ11;KCNQ2;NRCAM;SCN5A;KCTD6

## Sheet: KEGG_2019_Mouse
Curated Late
Term	Overlap	P-value	Adjusted P-value	Old P-value	Old Adjusted P-value	Odds Ratio	Combined Score	Genes
MAPK signaling pathway	22/294	0.000626155	0.189725	0	0	2.15959	15.929	MAP4K2;NTRK2;GADD45B;IL1R1;PLA2G4B;IL1RAP;IRAK4;DUSP16;NFKB1;RELB;VEGFA;NFKB2;TNFRSF1A;RPS6KA4;NR4A1;EFNA3;CACNB4;DUSP10;FAS;MAPT;MYD88;CACNG4
Insulin secretion	10/86	0.000771691	0.116911	0	0	3.35582	24.0509	CAMK2D;FXYD2;CREB3L2;KCNMA1;KCNMB4;ITPR3;ADCY8;VAMP2;RAPGEF4;TRPM4
Pan Ect
Term	Overlap	P-value	Adjusted P-value	Odds Ratio	Combined Score	Genes
Axon guidance	48/180	6.00925e-08	1.8208e-05	2.21852	36.8883	SEMA5B;SEMA3C;SRC;SEMA3D;SEMA3A;SEMA3B;LRRC4;NTN4;PARD6G;SEMA3E;PIK3R1;PIK3CB;SEMA3F;PRKCZ;GNAI1;MYL12B;EFNB2;NRAS;ABLIM1;PARD6B;PAK1;PLXNA2;RAC3;PAK6;PLXNC1;EPHB2;HRAS;PAK2;PDK1;WNT4;NTNG2;SEMA4A;FZD3;SEMA4D;UNC5B;RYK;PTCH1;SEMA4B;LIMK2;SEMA4G;SSH3;BMP7;EFNA1;PARD3;PLXNB1;EPHA1;MET;EPHA2
Hippo signaling pathway	40/159	3.61878e-06	0.000548246	2.09295	26.2233	WWC1;SERPINE1;PARD6G;FZD10;FGF1;PRKCZ;AMOT;WNT6;PARD6B;PAK1;CCND2;CDH1;RASSF6;TEAD1;WNT3;WNT4;TEAD3;WNT10B;PRKCI;WNT10A;FZD3;FZD5;WNT3A;WNT7B;FZD6;TRP73;WNT9B;BMP8B;WNT7A;MPP5;BMP7;MOB1B;LATS1;APC;PPP2R2B;PARD3;ID1;CTNNB1;AJUBA;LLGL2
Proteoglycans in cancer	46/203	1.43221e-05	0.00144653	1.8852	21.027	SDC4;ITGB5;SRC;HSPB2;FZD10;PIK3R1;IQGAP1;PIK3CB;TNF;EGFR;WNT6;NRAS;PAK1;ERBB3;CTSL;ERBB2;ITGAV;HRAS;WNT3;WNT4;WNT10B;WNT10A;FZD3;FZD5;WNT3A;CAV2;WNT7B;PTCH1;ITGA2;FZD6;IGF2;GAB1;WNT9B;WNT7A;ANK3;MAPK14;HSPG2;VAV2;MAPK13;TIAM1;PDCD4;CTNNB1;PTPN6;EZR;PPP1R12B;MET
Signaling pathways regulating pluripotency of stem cells	34/137	2.55808e-05	0.00193774	2.06469	21.8313	FZD10;PIK3R1;PIK3CB;ACVR1B;WNT6;NRAS;SMARCAD1;OTX1;SKIL;HRAS;WNT3;WNT4;WNT10B;WNT10A;FZD3;FZD5;WNT3A;PCGF5;WNT7B;ESRRB;FZD6;WNT9B;WNT7A;MAPK14;ISL1;ACVR2A;MAPK13;MEIS1;APC;ID1;ID4;CTNNB1;FGFR3;FGFR2
Tight junction	38/167	6.97226e-05	0.00422519	1.89305	18.1184	PRKAA2;SRC;NEDD4L;PRKAG2;PARD6G;F11R;CLDN1;PRKCZ;AMOT;MYL12B;SLC9A3R1;PARD6B;MARVELD2;CLDN23;MARVELD3;ERBB2;MYH14;MAP3K5;PRKCI;ARHGEF18;ACTN4;CGN;MPP5;CLDN6;TIAM1;CLDN4;OCLN;PPP2R2B;PARD3;CLDN8;CLDN7;MYH9;AMOTL2;AMOTL1;EZR;LLGL2;TJP2;CRB3
Small cell lung cancer	24/92	0.000166471	0.00840678	2.1703	18.8831	RB1;LAMA5;CDKN2B;LAMB3;ITGA3;ITGA2;LAMA3;LAMC2;LAMB1;PIK3CB;LAMC1;TRAF1;PIK3R1;FHIT;GADD45G;RXRA;CDK6;TRAF3;TRAF6;COL4A6;COL4A5;ITGAV;ITGA6;BCL2L1
Basal cell carcinoma	18/63	0.00031732	0.0096148	2.37699	19.1481	WNT10B;WNT10A;FZD3;FZD5;WNT3A;PTCH1;WNT7B;PTCH2;FZD6;WNT9B;WNT7A;FZD10;GADD45G;WNT6;APC;CTNNB1;WNT3;WNT4
Human papillomavirus infection	66/360	0.000294671	0.00992059	1.52524	12.3996	RB1;H2-T23;MAML2;ITGB5;ITGB4;TRADD;LAMC2;FZD10;PIK3CB;LAMC1;TNF;LFNG;CCND2;CASP8;ITGB8;ITGAV;ITGB6;HRAS;PRKCI;ITGA3;ITGA2;WNT9B;TYK2;TRAF3;PARD3;COL4A6;COL6A4;COL4A5;ITGA6;MAML3;H2-D1;LLGL2;LAMA5;NOTCH1;LAMA3;H2-Q4;PARD6G;PIK3R1;PRKCZ;H2-Q1;EGFR;FOXO1;SLC9A3R1;WNT6;NRAS;PARD6B;TERT;HES1;WNT3;WNT4;WNT10B;WNT10A;FZD3;FZD5;LAMB3;WNT3A;WNT7B;FZD6;WNT7A;LAMB1;MPP5;CDK6;APC;PPP2R2B;CTNNB1;CRB3
Breast cancer	33/147	0.000264144	0.0100045	1.86764	15.3875	RB1;NOTCH1;FZD10;PIK3R1;PIK3CB;FGF1;DLL1;EGFR;WNT6;NRAS;ERBB2;HES1;HRAS;WNT3;WNT4;JAG2;WNT10B;WNT10A;FZD3;FZD5;WNT3A;NCOA3;WNT7B;FZD6;WNT9B;WNT7A;FOS;GADD45G;CDK6;APC;KIT;CTNNB1;PGR
ECM-receptor interaction	22/83	0.000239366	0.0103611	2.20516	18.3856	LAMA5;ITGB5;SDC4;LAMB3;ITGB4;ITGA3;ITGA2;LAMA3;LAMC2;LAMB1;LAMC1;NPNT;HSPG2;DAG1;COL4A6;COL6A4;ITGB8;COL4A5;ITGAV;ITGA6;ITGB6;AGRN
Melanogenesis	24/100	0.000633522	0.0159964	1.99667	14.7039	WNT10B;WNT10A;FZD3;FZD5;WNT3A;WNT7B;FZD6;WNT9B;WNT7A;CALML3;FZD10;ADCY1;ADCY7;GNAI1;WNT6;PLCB3;NRAS;KITL;KIT;CTNNB1;CALM4;HRAS;WNT3;WNT4
Focal adhesion	40/199	0.000716065	0.0166898	1.67225	12.11	LAMA5;ITGB5;ITGB4;SRC;RASGRF1;LAMA3;PDGFA;LAMC2;PIK3R1;PIK3CB;LAMC1;EGFR;MYL12B;PAK1;CCND2;PDGFD;PDGFC;ERBB2;RAC3;PAK6;ITGB8;ITGAV;ITGB6;HRAS;PAK2;VAV3;LAMB3;CAV2;ITGA3;ITGA2;LAMB1;ACTN4;VAV2;COL4A6;COL6A4;CTNNB1;COL4A5;ITGA6;PPP1R12B;MET
Regulation of actin cytoskeleton	43/217	0.000631614	0.0173981	1.64856	12.1453	ITGB5;ITGB4;SRC;PDGFA;PIK3R1;IQGAP1;PIK3CB;FGF1;EGFR;MYL12B;FGD3;NRAS;PAK1;PDGFD;PDGFC;BDKRB2;RAC3;PAK6;MYH14;ITGB8;ITGAV;PIP4K2C;ITGB6;HRAS;PAK2;VAV3;ITGA3;ITGA2;LIMK2;ACTN4;BAIAP2;SSH3;VAV2;TIAM1;PIKFYVE;APC;ARHGEF4;MYH9;ITGA6;EZR;PPP1R12B;FGFR3;FGFR2
Gastric cancer	32/150	0.000829446	0.0179516	1.77482	12.5919	RB1;FZD10;PIK3R1;PIK3CB;FGF1;EGFR;WNT6;NRAS;RXRA;TERT;CDH1;ERBB2;HRAS;WNT3;WNT4;WNT10B;WNT10A;FZD3;CDKN2B;FZD5;JUP;WNT3A;WNT7B;FZD6;GAB1;WNT9B;WNT7A;GADD45G;APC;CTNNB1;MET;FGFR2
Late Mes
Term	Overlap	P-value	Adjusted P-value	Odds Ratio	Combined Score	Genes
ECM-receptor interaction	29/83	5.93401e-09	1.79801e-06	3.19085	60.4428	ITGB1;LAMA2;LAMC3;ITGA2B;TNC;THBS2;THBS1;THBS3;RELN;IBSP;TNN;SV2A;CHAD;GP1BB;FN1;GP1BA;GP5;COL1A1;GP9;COL1A2;COL6A2;ITGA10;COL6A1;ITGA11;COL9A1;COL6A3;COL6A6;COL9A3;COL9A2
Protein digestion and absorption	28/90	1.84044e-07	2.78827e-05	2.8412	44.0615	COL14A1;ELN;COL11A1;COL12A1;COL11A2;ATP1A2;PRCP;SLC8A1;CPA3;COL27A1;MME;ATP1B2;COL1A1;SLC8A3;COL3A1;SLC7A7;COL1A2;SLC7A8;COL5A1;XPNPEP2;COL6A2;COL6A1;COL5A2;COL9A1;COL6A3;COL6A6;COL9A3;COL9A2
Axon guidance	42/180	1.50617e-06	0.000152123	2.1309	28.5667	SEMA5A;EPHB6;ITGB1;NRP1;SEMA7A;PIK3CD;EFNA5;ROBO1;NTN3;GNAI2;EFNB1;PPP3CA;EFNB3;PPP3CC;ABLIM3;DPYSL2;BOC;PAK7;SLIT3;FYN;SLIT2;EPHB4;EPHB3;EPHA5;SEMA6B;SEMA6C;EPHA7;SEMA6A;TRPC4;WNT5A;LIMK1;NFATC2;PRKCA;SEMA4F;UNC5D;GDF7;NFATC4;RGMA;CXCL12;FES;MYL9;EPHA3
Dilated cardiomyopathy (DCM)	26/90	2.41064e-06	0.000182606	2.63825	34.1275	ITGB1;RYR2;LAMA2;ITGA2B;ADCY4;ADCY3;ADCY2;CACNA1C;SLC8A1;ADCY5;SGCB;LMNA;SGCG;TGFB1;TGFB3;TPM2;CACNA2D1;TNNC1;CACNA2D3;CACNA2D2;CACNB1;ADCY9;ACTC1;TNNT2;ITGA10;ITGA11
Glutamatergic synapse	30/114	3.55812e-06	0.000215622	2.40327	30.1521	GRIK5;SLC1A2;GRIK3;ADCY4;CACNA1A;ITPR2;GRIK4;ADCY3;GRIK1;ADCY2;CACNA1C;SLC1A6;ADCY5;GNAI2;PPP3CA;GNG10;PPP3CC;GRM7;GNG4;GNG7;DLGAP1;GRIA3;GRIA4;PRKCA;GRIN2D;ADCY9;GRIN3A;DLG4;SHANK3;SHANK2
Morphine addiction	25/92	1.23007e-05	0.000621186	2.48164	28.057	GABRB2;GABRB1;PDE1B;PDE1A;ADCY4;ADCY3;CACNA1A;ADCY2;ADCY5;GNAI2;GNG10;GRK4;GNG4;GNG7;PDE4B;GABRE;PDE8A;GABRA1;GABBR1;GABRA4;PDE2A;PRKCA;ADCY9;PDE3A;PDE7B
Focal adhesion	41/199	4.80404e-05	0.00207946	1.88155	18.7092	ITGB1;SHC2;FLT1;LAMA2;LAMC3;ITGA2B;TNC;PIK3CD;THBS2;THBS1;MYLK3;THBS3;RELN;IBSP;TNN;CHAD;PAK7;CAPN2;FLNA;FLNB;FYN;FLNC;PDGFRB;FN1;PRKCA;COL1A1;MYLPF;COL1A2;PARVG;ITGA10;COL6A2;ITGA11;COL6A1;COL9A1;BCL2;COL6A3;COL9A3;COL6A6;COL9A2;MYL9;BIRC3
Calcium signaling pathway	39/189	7.00282e-05	0.00265232	1.88447	18.028	PTGFR;RYR2;PDE1B;PTGER1;PDE1A;PTGER3;ATP2A3;ADCY4;CACNA1A;ITPR2;ADCY3;ADCY2;CALML4;CACNA1C;ADRA1B;MYLK3;SLC8A1;CACNA1H;RYR3;CACNA1G;PPP3CA;HTR6;PPP3CC;PDGFRB;NOS2;TNNC1;SPHK1;TNNC2;ATP2B4;TACR3;PRKCA;AVPR1A;TPCN2;GRIN2D;TPCN1;ITPKB;SLC8A3;ADCY9;STIM1
cGMP-PKG signaling pathway	36/172	9.64257e-05	0.00324633	1.91144	17.6746	NPR2;ATP2A3;ADCY4;ITPR2;ADCY3;ATP1A2;ADCY2;CALML4;CACNA1C;ADRA1B;MYLK3;SLC8A1;ADCY5;GNAI2;PPP3CA;RGS2;PPP3CC;CREB3L1;KCNMB2;PRKG2;MEF2D;PRKG1;MEF2C;PRKCE;PDE2A;ATP2B4;NFATC2;NFATC1;ATP1B2;ADRA2A;NFATC4;SLC8A3;KCNU1;ADCY9;PDE3A;MYL9
Parathyroid hormone synthesis, secretion and action	25/107	0.000183108	0.00462347	2.13374	18.3618	ADCY4;ITPR2;ADCY3;ADCY2;PTH1R;ADCY5;GNAI2;CREB3L1;PDE4B;TNFSF11;FGF23;RXRG;MEF2D;MEF2C;PRKCA;RUNX2;NR4A2;MMP14;ADCY9;MAFB;MMP16;MMP17;BCL2;FGFR1;HBEGF
Platelet activation	28/125	0.000167918	0.00462537	2.04566	17.781	ITGB1;ITGA2B;ADCY4;ITPR2;PIK3CD;ADCY3;ADCY2;MYLK3;ADCY5;GNAI2;P2RY1;PRKG2;FYN;PRKG1;P2RY12;PTGIR;GP1BB;GP1BA;GP5;COL1A1;APBB1IP;GP9;MAPK11;COL3A1;ADCY9;COL1A2;STIM1;TBXAS1
Arrhythmogenic right ventricular cardiomyopathy (ARVC)	19/72	0.000200704	0.00467795	2.40994	20.5175	ITGB1;RYR2;TCF7L1;LAMA2;CACNA2D1;ITGA2B;CACNA2D3;CACNA2D2;CACNA1C;SLC8A1;CACNB1;GJA1;CDH2;SGCB;ITGA10;LMNA;ITGA11;CTNNA2;SGCG
Malaria	15/49	0.000156231	0.00473379	2.79564	24.5015	CCL12;TGFB1;VCAM1;LRP1;TGFB3;SDC2;IL18;HBB-BT;HBB-BS;THBS2;THBS1;THBS3;CCL2;ACKR1;TLR2
Hypertrophic cardiomyopathy (HCM)	21/86	0.000307532	0.00665586	2.23001	18.0339	ITGB1;RYR2;TGFB1;LAMA2;TGFB3;TPM2;CACNA2D1;TNNC1;ITGA2B;CACNA2D3;CACNA2D2;CACNA1C;SLC8A1;CACNB1;ACTC1;SGCB;TNNT2;ITGA10;LMNA;ITGA11;SGCG
Adrenergic signaling in cardiomyocytes	30/148	0.000622586	0.0125762	1.85117	13.6646	RYR2;ADCY4;ADCY3;ATP1A2;ADCY2;CALML4;CACNA1C;ADRA1B;SLC8A1;ADCY5;GNAI2;CREB3L1;SCN1B;TPM2;CACNA2D1;TNNC1;CACNA2D3;PPP2R5B;ATP2B4;CACNA2D2;PRKCA;ATP1B2;MYL4;CACNB1;MAPK11;ADCY9;ACTC1;TNNT2;BCL2;AGTR2
Circadian entrainment	22/99	0.000897912	0.0170042	2.02943	14.2373	RYR2;ADCY4;ADCY3;PRKCA;ADCY2;CALML4;CACNA1C;CACNA1H;RYR3;CACNA1G;GRIN2D;ADCY5;GNAI2;ADCYAP1;GNG10;ADCY9;GNG4;GNG7;PRKG2;GRIA3;PRKG1;GRIA4
Pan Mes
Term	Overlap	P-value	Adjusted P-value	Odds Ratio	Combined Score	Genes
Rap1 signaling pathway	29/209	4.61044e-12	1.39696e-09	4.6877	122.362	CSF1R;RALB;FLT4;ITGB3;PDGFB;LPAR1;RASGRP2;ACTB;FYB;RASGRP3;RRAS;KDR;RAC2;NGFR;PDGFRA;VEGFB;VEGFC;ARAP3;IGF1;EFNA2;ADORA2A;RAPGEF2;CALM3;LCP2;TEK;PLCB1;RAPGEF3;LAT;F2RL3
Ras signaling pathway	25/233	3.01474e-08	4.56733e-06	3.62487	62.7725	CSF1R;RALB;SHC1;FLT4;PDGFB;RASGRP2;ETS1;RASGRP3;GNGT2;RRAS;KDR;RAC2;NGFR;PDGFRA;VEGFB;VEGFC;IGF1;GNG11;EFNA2;GNB4;FLT3L;CALM3;TEK;RGL1;LAT
Focal adhesion	22/199	1.19692e-07	1.20889e-05	3.73489	59.528	PDGFRA;ITGA4;VWF;SHC1;ACTN1;FLT4;ITGB3;LAMA4;ITGA1;PDGFB;VEGFB;VEGFC;IGF1;ACTB;VAV1;KDR;RAC2;ZYX;ITGA8;ITGA5;PPP1R12C;VCL
Pathways in cancer	38/535	6.57352e-07	4.97944e-05	2.3996	34.1584	CAMK2B;CSF1R;RALB;EPAS1;NOTCH4;FLT4;LAMA4;LEF1;CAMK2A;PDGFB;LPAR1;RASGRP2;ETS1;RASGRP3;DLL4;EDNRA;GNGT2;WNT11;PEG12;RAC2;HMOX1;RUNX1T1;FZD1;NQO1;PDGFRA;APAF1;VEGFB;VEGFC;IGF1;AXIN2;GNG11;AGTR1A;EPOR;GNB4;FLT3L;CALM3;PLCB1;F2RL3
Platelet activation	16/125	8.94322e-07	5.41959e-05	4.32432	60.2257	FCER1G;VWF;NOS3;ITGB3;RASGRP2;ACTB;PIK3R6;PIK3CG;PTGS1;TBXA2R;P2RX1;BTK;LCP2;PLCB1;FERMT3;F2RL3
PI3K-Akt signaling pathway	28/357	3.06997e-06	0.000155034	2.64971	33.635	CSF1R;FLT4;ITGB3;LAMA4;PDGFB;LPAR1;PIK3R6;PIK3CG;GNGT2;KDR;NGFR;PDGFRA;ITGA4;VWF;NOS3;ITGA1;VEGFB;VEGFC;IGF1;GNG11;EPOR;EFNA2;GNB4;ITGA8;FLT3L;ITGA5;TEK;SGK1
Regulation of actin cytoskeleton	20/217	7.61104e-06	0.000329449	3.11371	36.6979	PDGFRA;ITGA4;ACTN1;ITGB3;ITGA1;PDGFB;LPAR1;WAS;MSN;ACTB;VAV1;FGD1;RRAS;RAC2;ITGA8;PIP4K2B;NCKAP1L;ITGA5;PPP1R12C;VCL
Arrhythmogenic right ventricular cardiomyopathy (ARVC)	10/72	4.92276e-05	0.00186449	4.69219	46.5421	CACNG7;CACNG8;SGCD;ITGA4;ITGB3;ITGA1;LEF1;ITGA8;ITGA5;ACTB
MAPK signaling pathway	22/294	6.99744e-05	0.0023558	2.52804	24.1867	NGFR;MAP3K3;PDGFRA;CSF1R;FLT4;PDGFB;VEGFB;VEGFC;IGF1;RASGRP2;DUSP7;RASGRP3;CACNG7;CACNG8;EFNA2;RRAS;KDR;RAC2;RAPGEF2;FLT3L;TEK;PTPN7
Phospholipase D signaling pathway	14/149	0.000141148	0.0042768	3.17432	28.1425	PDGFRA;FCER1G;RALB;SHC1;PDGFB;LPAR1;PIK3R6;PIK3CG;AGTR1A;DNM1;CYTH4;RRAS;PLCB1;RAPGEF3
Leukocyte transendothelial migration	12/115	0.000155769	0.00429074	3.52526	30.9065	CDH5;CLDN5;ITGA4;ACTN1;RAC2;PECAM1;MSN;ESAM;ACTB;VCL;VAV1;RAPGEF3
Oxytocin signaling pathway	14/154	0.000199992	0.00504979	3.07125	26.1586	CAMK2B;NPR1;NOS3;CAMK2A;ACTB;PIK3R6;PIK3CG;CACNG7;CACNG8;CD38;CALM3;CAMK1;PLCB1;PPP1R12C
Hypertrophic cardiomyopathy (HCM)	10/86	0.000224558	0.00523393	3.92835	33.0035	CACNG7;CACNG8;SGCD;ITGA4;ITGB3;ITGA1;ITGA8;ITGA5;IGF1;ACTB
Glycosphingolipid biosynthesis	7/45	0.000328125	0.00662813	5.25526	42.1583	ST8SIA1;ST3GAL4;ST6GALNAC3;ST3GAL1;ST6GALNAC4;ST3GAL2;ST6GALNAC6
Dilated cardiomyopathy (DCM)	10/90	0.000326488	0.00706614	3.75375	30.1318	CACNG7;CACNG8;SGCD;ITGA4;ITGB3;ITGA1;ITGA8;ITGA5;IGF1;ACTB
Fc epsilon RI signaling pathway	8/68	0.000871068	0.0155255	3.97456	28.0039	FCER1G;INPP5D;ALOX5AP;RAC2;BTK;LCP2;VAV1;LAT
Apelin signaling pathway	12/138	0.000833016	0.0157752	2.93772	20.8298	GNGT2;RRAS;NOS3;APLNR;GNB4;CALM3;PLCB1;GNG11;PIK3R6;PIK3CG;AGTR1A;APLN
Wnt signaling pathway	13/160	0.000971944	0.0163611	2.74493	19.0394	FZD1;CAMK2B;SERPINF1;LEF1;CAMK2A;AXIN2;NKD2;WNT11;PEG12;SOX17;RAC2;ROR2;PLCB1
Early Mes
Term	Overlap	P-value	Adjusted P-value	Odds Ratio	Combined Score	Genes
RNA transport	38/167	1.49482e-08	2.26465e-06	2.67857	48.2644	NUP205;POP1;FMR1;RPP30;NMD3;AAAS;EIF4EBP1;EIF4EBP2;NUP43;EIF3J2;SMN1;EIF3J1;EIF4E;RPP38;EIF2B5;EIF2B4;PRMT5;EIF2B3;ALYREF;PABPC4;RPP40;THOC1;EIF2S2;EIF2S1;THOC7;EIF1;EIF5;CLNS1A;NUP50;GEMIN4;GEMIN5;GEMIN6;EIF3E;PABPC1;EIF1A;KPNB1;RAN;NUP37
Ribosome	39/170	7.60636e-09	2.30473e-06	2.70055	50.4849	RPL30;MRPS15;RPL34;RPLP1;RPL11;RPL36A;RPS27L;MRPL12;MRPL13;RPL7;RPS14;MRPL20;MRPL1;RPS19;RPL36AL;RPL36;RPL14;RPLP2;RPL38;RPL37;RPS2;RPS11;RPL18;RPL41;RPS8;MRPS21;RPSA;MRPS18C;MRPL22;RPS25;RPS28;RPS29;RPS3A1;RPS27RT;RPL24;RPL26;RPL29;RPS21;RPS24
Cell cycle	29/123	3.32904e-07	3.36233e-05	2.77543	41.3966	PCNA;BUB1B;TTK;CDC14B;ORC5;CCNB1;ORC6;CDC45;PTTG1;ORC1;CHEK2;MYC;CHEK1;CDC27;ORC2;SKP2;E2F5;BUB1;YWHAH;CDC6;CDC25C;CCNA2;TFDP1;CCNE2;CCNE1;MCM4;MCM5;ANAPC1;MAD2L1
Ribosome biogenesis in eukaryotes	27/115	9.15324e-07	6.93358e-05	2.76377	38.4275	POP1;RPP30;WDR3;HEATR1;NMD3;SPATA5;WDR43;FBL;GAR1;RIOK2;RPP38;MDN1;NOP58;UTP6;RPP40;WDR75;IMP4;REXO2;GTPBP4;GNL3;RCL1;TBL3;DKC1;NHP2;MPHOSPH10;NOP10;RAN
DNA replication	12/35	1.77938e-05	0.00107831	4.03599	44.1402	PRIM2;FEN1;POLA2;PCNA;RFC4;LIG1;PRIM1;RPA3;POLE2;MCM4;MCM5;DNA2
Glutathione metabolism	15/64	0.000239608	0.0121002	2.75898	23.0002	RRM1;GPX1;RRM2;GPX4;GPX3;GSTO1;GSTP1;IDH1;ODC1;SRM;GGCT;GCLC;SMS;LAP3;GSTM5
Proteasome	12/46	0.000344779	0.014924	3.07086	24.4828	PSMB7;PSMA6;PSMD12;PSMD11;PSMC6;PSMA4;PSMC3;PSME3;PSME4;PSMA7;PSMB10;PSMA8
RNA degradation	17/83	0.00052604	0.0199238	2.41106	18.2038	HSPA9;TTC37;PNPT1;DIS3;PABPC4;ENO1;ENO3;LSM3;HSPD1;LSM2;LSM6;EXOSC9;EXOSC8;PABPC1;EXOSC2;DCP2;MPHOSPH6
One carbon pool by folate	7/19	0.000636107	0.0214156	4.33692	31.9203	DHFR;MTHFD1L;SHMT2;MTHFD2;SHMT1;AMT;GART
Cysteine and methionine metabolism	12/50	0.000782922	0.0237225	2.82519	20.2071	GM4737;LDHB;MTAP;GCLC;AMD2;MAT2A;GOT1;AMD1;DNMT3A;SMS;BCAT1;SRM
Pyrimidine metabolism	13/58	0.000960812	0.026466	2.63847	18.3314	DUT;RRM1;RRM2;CAD;NME2;CTPS;NME1;DCTD;UCK2;PNP;TK1;UMPS;DCTPP1
Early Ect
Term	Overlap	P-value	Adjusted P-value	Odds Ratio	Combined Score	Genes
Glycolysis / Gluconeogenesis	10/67	5.09109e-05	0.015426	4.6569	46.0355	GPI1;LDHA;PFKL;TPI1;PKM;G6PC3;PGK1;PGM2;ALDOA;ENO4
NE
Term	Overlap	P-value	Adjusted P-value	Odds Ratio	Combined Score	Genes
Synaptic vesicle cycle	14/77	0.000165323	0.0500928	3.04553	26.5193	UNC13B;SNAP25;RAB3A;UNC13A;ATP6V1G2;SLC1A1;SLC17A6;SLC17A7;ATP6V0A4;ATP6V1G3;ATP6V0E2;STX1A;ATP6V1B1;ATP6V1C2
