# Supplementary material for: An Alternative Splicing Program for Mouse Craniofacial Development
Source: Front Physiol. 2020 Sep 4;11:1099. doi: 10.3389/fphys.2020.01099 (PMC7498679; doi:10.3389/fphys.2020.01099)
Supplement: Supplementary file 4 [file Table_4.xlsx]

## Sheet: SE
Type of comparison	Comparisom (sample1_vs_sample2)	Genes with higher PSI in smaple1	Genes with higher PSI in smaple2	Events with higher PSI in smaple1	Events with higher PSI in smaple2	Note
Layer	E12.5_MxP_Ect_vs_Mes	600	275	769	322
Layer	E12.5_FNP_Ect_vs_Mes	602	302	738	358
Layer	E12.5_MdP_Ect_vs_Mes	562	266	708	316
Layer	E11.5_MxP_Ect_vs_Mes	404	251	500	294
Layer	E11.5_FNP_Ect_vs_Mes	428	251	518	305
Layer	E11.5_MdP_Ect_vs_Mes	386	269	470	320
Layer	E10.5_MxP_Ect_vs_Mes	595	387	711	463
Layer	E10.5_FNP_Ect_vs_Mes	465	374	563	425
Layer	E10.5_MdP_Ect_vs_Mes	380	270	461	310
Age	MXP_Ect_E10.5_vs_E11.5	292	233	330	253
Age	MXP_Ect_E11.5_vs_E12.5	174	213	194	235
Age	FNP_Ect_E10.5_vs_E11.5	344	372	415	428
Age	FNP_Ect_E11.5_vs_E12.5	163	176	188	188
Age	MNP_Ect_E10.5_vs_E11.5	281	242	334	269
Age	MNP_Ect_E11.5_vs_E12.5	170	196	189	220
Age	MXP_Mes_E10.5_vs_E11.5	519	373	622	421
Age	MXP_Mes_E11.5_vs_E12.5	387	265	453	302
Age	FNP_Mes_E10.5_vs_E11.5	505	437	582	503
Age	FNP_Mes_E11.5_vs_E12.5	316	260	365	295
Age	MNP_Mes_E10.5_vs_E11.5	344	256	386	287
Age	MNP_Mes_E11.5_vs_E12.5	329	212	381	240
Prominence	E10.5_Ect_MxP_vs_FNP	252	175	290	191
Prominence	E10.5_Ect_MxP_vs_MdP	130	119	139	132
Prominence	E10.5_Ect_FNP_vs_MdP	218	253	240	283
Prominence	E11.5_Ect_MxP_vs_FNP	39	46	40	48
Prominence	E11.5_Ect_MxP_vs_MdP	29	34	32	36
Prominence	E11.5_Ect_FNP_vs_MdP	78	51	82	52
Prominence	E12.5_Ect_MxP_vs_FNP	30	40	33	41
Prominence	E12.5_Ect_MxP_vs_MdP	61	55	65	58
Prominence	E12.5_Ect_FNP_vs_MdP	61	41	67	48
Prominence	E10.5_Mes_MxP_vs_FNP	429	418	491	475
Prominence	E10.5_Mes_MxP_vs_MdP	326	311	378	340
Prominence	E10.5_Mes_FNP_vs_MdP	294	329	337	363
Prominence	E11.5_Mes_MxP_vs_FNP	56	65	61	77
Prominence	E11.5_Mes_MxP_vs_MdP	51	61	53	73
Prominence	E11.5_Mes_FNP_vs_Mes	64	63	69	70
Prominence	E12.5_Mes_MxP_vs_FNP	58	67	67	73
Prominence	E12.5_Mes_MxP_vs_MdP	65	64	75	68
Prominence	E12.5_Mes_FNP_vs_MdP	77	64	86	73
NE.layer	E11.5_FNP_Ect_vs_NE	280	275	331	341	NE comparison
NE.layer	E11.5_FNP_Mes_vs_NE	299	403	356	493	NE comparison
NE.layer	E12.5_FNP_Ect_vs_NE	304	295	358	358	NE comparison
NE.layer	E12.5_FNP_Mes_vs_NE	386	650	452	822	NE comparison
NE.age	E10.5_FNP_Ect_vs_E11.5_NE	228	208	261	227	NE comparison
NE.age	Nasal_epi_E11.5_vs_E12.5	214	241	247	283	NE comparison

## Sheet: MXE
Type of comparison	Comparisom (sample1_vs_sample2)	Genes with higher PSI in smaple1	Genes with higher PSI in smaple2	Events with higher PSI in smaple1	Events with higher PSI in smaple2	Note
Layer	E12.5_MxP_Ect_vs_Mes	107	112	134	127
Layer	E12.5_FNP_Ect_vs_Mes	106	107	133	124
Layer	E12.5_MdP_Ect_vs_Mes	102	117	131	140
Layer	E11.5_MxP_Ect_vs_Mes	75	85	91	103
Layer	E11.5_FNP_Ect_vs_Mes	88	83	105	92
Layer	E11.5_MdP_Ect_vs_Mes	86	70	104	81
Layer	E10.5_MxP_Ect_vs_Mes	190	169	207	193
Layer	E10.5_FNP_Ect_vs_Mes	247	122	265	133
Layer	E10.5_MdP_Ect_vs_Mes	93	81	105	85
Age	MXP_Ect_E10.5_vs_E11.5	873	1051	1028	1248
Age	MXP_Ect_E11.5_vs_E12.5	786	782	889	915
Age	FNP_Ect_E10.5_vs_E11.5	867	864	1022	1020
Age	FNP_Ect_E11.5_vs_E12.5	691	662	796	770
Age	MNP_Ect_E10.5_vs_E11.5	731	923	842	1098
Age	MNP_Ect_E11.5_vs_E12.5	713	635	827	736
Age	MXP_Mes_E10.5_vs_E11.5	867	1025	1056	1216
Age	MXP_Mes_E11.5_vs_E12.5	1067	1089	1274	1324
Age	FNP_Mes_E10.5_vs_E11.5	805	1073	954	1314
Age	FNP_Mes_E11.5_vs_E12.5	1075	1115	1306	1374
Age	MNP_Mes_E10.5_vs_E11.5	793	919	947	1111
Age	MNP_Mes_E11.5_vs_E12.5	922	915	1073	1090
Prominence	E10.5_Ect_MxP_vs_FNP	42	35	45	36
Prominence	E10.5_Ect_MxP_vs_MdP	18	25	18	25
Prominence	E10.5_Ect_FNP_vs_MdP	46	40	51	42
Prominence	E11.5_Ect_MxP_vs_FNP	3	1	4	1
Prominence	E11.5_Ect_MxP_vs_MdP	5	1	5	1
Prominence	E11.5_Ect_FNP_vs_MdP	6	6	6	7
Prominence	E12.5_Ect_MxP_vs_FNP	7	6	8	6
Prominence	E12.5_Ect_MxP_vs_MdP	12	7	12	7
Prominence	E12.5_Ect_FNP_vs_MdP	4	6	4	6
Prominence	E10.5_Mes_MxP_vs_FNP	142	89	151	92
Prominence	E10.5_Mes_MxP_vs_MdP	95	108	98	113
Prominence	E10.5_Mes_FNP_vs_MdP	129	169	138	175
Prominence	E11.5_Mes_MxP_vs_FNP	9	3	10	3
Prominence	E11.5_Mes_MxP_vs_MdP	4	4	4	4
Prominence	E11.5_Mes_FNP_vs_Mes	1	7	1	7
Prominence	E12.5_Mes_MxP_vs_FNP	4	13	4	14
Prominence	E12.5_Mes_MxP_vs_MdP	6	6	6	6
Prominence	E12.5_Mes_FNP_vs_MdP	6	19	8	19
NE.layer	E11.5_FNP_Ect_vs_NE	60	64	69	68	NE comparison
NE.layer	E11.5_FNP_Mes_vs_NE	86	86	99	105	NE comparison
NE.layer	E12.5_FNP_Ect_vs_NE	89	82	96	92	NE comparison
NE.layer	E12.5_FNP_Mes_vs_NE	229	209	256	243	NE comparison
NE.age	E10.5_FNP_Ect_vs_E11.5_NE	884	959	1057	1152	NE comparison
NE.age	Nasal_epi_E11.5_vs_E12.5	519	494	595	553	NE comparison

## Sheet: RI
Type of comparison	Comparisom (sample1_vs_sample2)	Genes with higher PSI in smaple1	Genes with higher PSI in smaple2	Events with higher PSI in smaple1	Events with higher PSI in smaple2	Note
Layer	E12.5_MxP_Ect_vs_Mes	31	15	36	17
Layer	E12.5_FNP_Ect_vs_Mes	27	18	33	19
Layer	E12.5_MdP_Ect_vs_Mes	20	15	20	19
Layer	E11.5_MxP_Ect_vs_Mes	13	17	14	20
Layer	E11.5_FNP_Ect_vs_Mes	15	16	15	19
Layer	E11.5_MdP_Ect_vs_Mes	14	21	15	22
Layer	E10.5_MxP_Ect_vs_Mes	23	24	23	24
Layer	E10.5_FNP_Ect_vs_Mes	18	26	19	26
Layer	E10.5_MdP_Ect_vs_Mes	18	13	18	13
Age	MXP_Ect_E10.5_vs_E11.5	25	15	26	15
Age	MXP_Ect_E11.5_vs_E12.5	11	25	11	26
Age	FNP_Ect_E10.5_vs_E11.5	20	16	22	19
Age	FNP_Ect_E11.5_vs_E12.5	14	12	15	14
Age	MNP_Ect_E10.5_vs_E11.5	16	12	16	12
Age	MNP_Ect_E11.5_vs_E12.5	18	22	19	24
Age	MXP_Mes_E10.5_vs_E11.5	20	15	20	16
Age	MXP_Mes_E11.5_vs_E12.5	22	15	22	16
Age	FNP_Mes_E10.5_vs_E11.5	27	12	27	12
Age	FNP_Mes_E11.5_vs_E12.5	19	21	20	22
Age	MNP_Mes_E10.5_vs_E11.5	16	17	17	18
Age	MNP_Mes_E11.5_vs_E12.5	18	19	19	21
Prominence	E10.5_Ect_MxP_vs_FNP	12	11	14	11
Prominence	E10.5_Ect_MxP_vs_MdP	10	10	10	10
Prominence	E10.5_Ect_FNP_vs_MdP	8	15	8	17
Prominence	E11.5_Ect_MxP_vs_FNP	2	4	2	4
Prominence	E11.5_Ect_MxP_vs_MdP	0	2	0	2
Prominence	E11.5_Ect_FNP_vs_MdP	6	4	6	4
Prominence	E12.5_Ect_MxP_vs_FNP	2	2	2	2
Prominence	E12.5_Ect_MxP_vs_MdP	9	2	9	2
Prominence	E12.5_Ect_FNP_vs_MdP	8	5	8	5
Prominence	E10.5_Mes_MxP_vs_FNP	7	15	8	15
Prominence	E10.5_Mes_MxP_vs_MdP	18	11	18	11
Prominence	E10.5_Mes_FNP_vs_MdP	22	12	22	12
Prominence	E11.5_Mes_MxP_vs_FNP	4	5	4	5
Prominence	E11.5_Mes_MxP_vs_MdP	8	6	8	6
Prominence	E11.5_Mes_FNP_vs_Mes	6	4	6	4
Prominence	E12.5_Mes_MxP_vs_FNP	8	5	8	5
Prominence	E12.5_Mes_MxP_vs_MdP	3	2	3	2
Prominence	E12.5_Mes_FNP_vs_MdP	8	9	8	9
NE.layer	E11.5_FNP_Ect_vs_NE	14	10	16	11	NE comparison
NE.layer	E11.5_FNP_Mes_vs_NE	21	15	23	16	NE comparison
NE.layer	E12.5_FNP_Ect_vs_NE	20	21	22	22	NE comparison
NE.layer	E12.5_FNP_Mes_vs_NE	25	29	27	30	NE comparison
NE.age	E10.5_FNP_Ect_vs_E11.5_NE	21	11	23	11	NE comparison
NE.age	Nasal_epi_E11.5_vs_E12.5	17	25	18	26	NE comparison

## Sheet: A5SS
Type of comparison	Comparisom (sample1_vs_sample2)	Genes with higher PSI in smaple1	Genes with higher PSI in smaple2	Events with higher PSI in smaple1	Events with higher PSI in smaple2	Note
Layer	E12.5_MxP_Ect_vs_Mes	34	18	37	18
Layer	E12.5_FNP_Ect_vs_Mes	40	24	41	25
Layer	E12.5_MdP_Ect_vs_Mes	34	31	35	31
Layer	E11.5_MxP_Ect_vs_Mes	19	19	19	19
Layer	E11.5_FNP_Ect_vs_Mes	25	27	25	27
Layer	E11.5_MdP_Ect_vs_Mes	24	20	25	22
Layer	E10.5_MxP_Ect_vs_Mes	36	51	40	55
Layer	E10.5_FNP_Ect_vs_Mes	41	30	43	31
Layer	E10.5_MdP_Ect_vs_Mes	31	22	31	24
Age	MXP_Ect_E10.5_vs_E11.5	17	24	17	24
Age	MXP_Ect_E11.5_vs_E12.5	11	16	11	17
Age	FNP_Ect_E10.5_vs_E11.5	25	23	25	23
Age	FNP_Ect_E11.5_vs_E12.5	7	25	7	26
Age	MNP_Ect_E10.5_vs_E11.5	30	18	30	18
Age	MNP_Ect_E11.5_vs_E12.5	12	19	12	19
Age	MXP_Mes_E10.5_vs_E11.5	62	38	70	40
Age	MXP_Mes_E11.5_vs_E12.5	19	25	19	25
Age	FNP_Mes_E10.5_vs_E11.5	50	35	54	36
Age	FNP_Mes_E11.5_vs_E12.5	20	28	20	28
Age	MNP_Mes_E10.5_vs_E11.5	30	26	32	26
Age	MNP_Mes_E11.5_vs_E12.5	26	32	28	33
Prominence	E10.5_Ect_MxP_vs_FNP	18	11	18	11
Prominence	E10.5_Ect_MxP_vs_MdP	11	16	11	16
Prominence	E10.5_Ect_FNP_vs_MdP	12	23	12	23
Prominence	E11.5_Ect_MxP_vs_FNP	5	3	5	3
Prominence	E11.5_Ect_MxP_vs_MdP	5	1	5	1
Prominence	E11.5_Ect_FNP_vs_MdP	10	11	10	11
Prominence	E12.5_Ect_MxP_vs_FNP	5	6	5	6
Prominence	E12.5_Ect_MxP_vs_MdP	4	8	4	8
Prominence	E12.5_Ect_FNP_vs_MdP	8	3	8	3
Prominence	E10.5_Mes_MxP_vs_FNP	50	38	51	41
Prominence	E10.5_Mes_MxP_vs_MdP	36	27	41	28
Prominence	E10.5_Mes_FNP_vs_MdP	30	30	32	31
Prominence	E11.5_Mes_MxP_vs_FNP	2	7	2	7
Prominence	E11.5_Mes_MxP_vs_MdP	6	10	6	12
Prominence	E11.5_Mes_FNP_vs_Mes	5	9	5	11
Prominence	E12.5_Mes_MxP_vs_FNP	2	6	2	6
Prominence	E12.5_Mes_MxP_vs_MdP	4	4	4	4
Prominence	E12.5_Mes_FNP_vs_MdP	4	2	4	2
NE.layer	E11.5_FNP_Ect_vs_NE	17	11	17	11	NE comparison
NE.layer	E11.5_FNP_Mes_vs_NE	21	20	21	21	NE comparison
NE.layer	E12.5_FNP_Ect_vs_NE	21	9	21	9	NE comparison
NE.layer	E12.5_FNP_Mes_vs_NE	24	31	25	31	NE comparison
NE.age	E10.5_FNP_Ect_vs_E11.5_NE	15	22	15	22	NE comparison
NE.age	Nasal_epi_E11.5_vs_E12.5	10	20	10	20	NE comparison

## Sheet: A3SS
Type of comparison	Comparisom (sample1_vs_sample2)	Genes with higher PSI in smaple1	Genes with higher PSI in smaple2	Events with higher PSI in smaple1	Events with higher PSI in smaple2	Note
Layer	E12.5_MxP_Ect_vs_Mes	42	25	44	26
Layer	E12.5_FNP_Ect_vs_Mes	44	25	45	25
Layer	E12.5_MdP_Ect_vs_Mes	40	23	41	23
Layer	E11.5_MxP_Ect_vs_Mes	34	16	35	16
Layer	E11.5_FNP_Ect_vs_Mes	30	17	30	17
Layer	E11.5_MdP_Ect_vs_Mes	25	25	25	26
Layer	E10.5_MxP_Ect_vs_Mes	70	58	72	58
Layer	E10.5_FNP_Ect_vs_Mes	57	49	57	51
Layer	E10.5_MdP_Ect_vs_Mes	41	27	43	27
Age	MXP_Ect_E10.5_vs_E11.5	32	40	33	40
Age	MXP_Ect_E11.5_vs_E12.5	22	27	22	27
Age	FNP_Ect_E10.5_vs_E11.5	50	51	50	51
Age	FNP_Ect_E11.5_vs_E12.5	30	40	30	41
Age	MNP_Ect_E10.5_vs_E11.5	40	33	41	33
Age	MNP_Ect_E11.5_vs_E12.5	29	33	29	33
Age	MXP_Mes_E10.5_vs_E11.5	76	62	78	64
Age	MXP_Mes_E11.5_vs_E12.5	50	39	50	40
Age	FNP_Mes_E10.5_vs_E11.5	67	54	67	55
Age	FNP_Mes_E11.5_vs_E12.5	47	31	47	32
Age	MNP_Mes_E10.5_vs_E11.5	48	36	49	38
Age	MNP_Mes_E11.5_vs_E12.5	34	28	36	28
Prominence	E10.5_Ect_MxP_vs_FNP	33	26	35	26
Prominence	E10.5_Ect_MxP_vs_MdP	9	18	9	20
Prominence	E10.5_Ect_FNP_vs_MdP	20	29	20	30
Prominence	E11.5_Ect_MxP_vs_FNP	2	5	2	5
Prominence	E11.5_Ect_MxP_vs_MdP	7	6	7	6
Prominence	E11.5_Ect_FNP_vs_MdP	12	13	12	13
Prominence	E12.5_Ect_MxP_vs_FNP	10	7	10	7
Prominence	E12.5_Ect_MxP_vs_MdP	10	13	10	13
Prominence	E12.5_Ect_FNP_vs_MdP	8	14	8	14
Prominence	E10.5_Mes_MxP_vs_FNP	67	76	68	77
Prominence	E10.5_Mes_MxP_vs_MdP	52	51	52	52
Prominence	E10.5_Mes_FNP_vs_MdP	53	50	53	51
Prominence	E11.5_Mes_MxP_vs_FNP	3	8	3	8
Prominence	E11.5_Mes_MxP_vs_MdP	1	12	1	13
Prominence	E11.5_Mes_FNP_vs_Mes	12	15	12	16
Prominence	E12.5_Mes_MxP_vs_FNP	6	5	6	5
Prominence	E12.5_Mes_MxP_vs_MdP	5	4	5	4
Prominence	E12.5_Mes_FNP_vs_MdP	6	8	6	8
NE.layer	E11.5_FNP_Ect_vs_NE	25	22	25	24	NE comparison
NE.layer	E11.5_FNP_Mes_vs_NE	39	42	39	44	NE comparison
NE.layer	E12.5_FNP_Ect_vs_NE	26	18	27	19	NE comparison
NE.layer	E12.5_FNP_Mes_vs_NE	37	43	37	43	NE comparison
NE.age	E10.5_FNP_Ect_vs_E11.5_NE	42	34	42	35	NE comparison
NE.age	Nasal_epi_E11.5_vs_E12.5	24	18	27	19	NE comparison
