# Supplementary material for: An Alternative Splicing Program for Mouse Craniofacial Development
Source: Front Physiol. 2020 Sep 4;11:1099. doi: 10.3389/fphys.2020.01099 (PMC7498679; doi:10.3389/fphys.2020.01099)
Supplement: Supplementary file 5 [file Table_5.xlsx]

## Sheet: SE 
geneSymbol	chr	strand	exonStart_0base	exonEnd	upstreamES	upstreamEE	downstreamES	downstreamEE	E10.5_FNP_Ect	E10.5_FNP_Mes	E10.5_MdP_Ect	E10.5_MdP_Mes	E10.5_MxP_Ect	E10.5_MxP_Mes	E11.5_FNP_Ect	E11.5_FNP_Mes	E11.5_MdP_Ect	E11.5_MdP_Mes	E11.5_MxP_Ect	E11.5_MxP_Mes	E12.5_FNP_Ect	E12.5_FNP_Mes	E12.5_MdP_Ect	E12.5_MdP_Mes	E12.5_MxP_Ect	E12.5_MxP_Mes	Nasal_epi_E11.5	Nasal_epi_E12.5	MaxdeltaPSI
0610009O20Rik	chr18	+	38258269	38258362	38257257	38257400	38261063	38261285	NA	NA	NA	NA	NA	NA	NA	NA	NA	NA	NA	NA	NA	NA	1	NA	0.844667	NA	NA	NA	0.155333
0610010F05Rik	chr11	-	23566118	23566195	23564960	23565136	23576730	23576822	0	0	0	0.031	NA	NA	0.0876667	0.031	0	0	0	0.0176667	0.184333	0	0	0.057	0.066	0.027	0	0.181667	0.184333
0610010F05Rik	chr11	-	23622435	23622525	23617137	23617196	23624935	23625122	NA	NA	NA	0.812333	NA	NA	NA	0.636333	0.899667	0.820333	NA	1	NA	NA	NA	NA	NA	NA	NA	NA	0.363667
0610010F05Rik	chr11	-	23633111	23633210	23631204	23631334	23633492	23633631	0.067	0	0.029	0.00633333	0.023	0	0.017	0.00866667	0.028	0.0406667	0.045	0.0486667	0.0483333	0.079	0.0533333	0.0283333	0.053	0.112	0.0233333	0.0326667	0.112
0610010K14Rik	chr11	-	70235695	70235760	70235205	70235464	70236023	70236211	0.471667	0.511667	0.548667	0.500667	0.56	0.519	0.557667	0.570667	0.557667	0.583333	0.565	0.554667	0.534	0.507	0.552	0.548667	0.529	0.507333	0.622667	0.622	0.151
0610010K14Rik	chr11	-	70235695	70235800	70235403	70235468	70236023	70236211	0.335	0.307333	0.342333	0.357667	0.356	0.409	0.354667	0.354	0.360333	0.358	0.383667	0.347667	0.320667	0.344	0.360333	0.352333	0.341	0.318	0.356667	0.363667	0.101667
0610010K14Rik	chr11	-	70236887	70236978	70236023	70236211	70237530	70237625	0.662	0.638	0.658333	0.636	0.607667	0.671333	0.615333	0.586667	0.622333	0.602	0.602333	0.593	0.631667	0.584667	0.616667	0.617667	0.594667	0.569333	0.611	0.660333	0.102
0610037L13Rik	chr4	+	107895550	107895586	107894872	107894938	107896661	107897118	0.162	0.0263333	NA	0.315	0.0543333	0.0466667	0.0383333	0.0836667	0.00966667	0.179333	0.126333	0.108667	0.0893333	0.113667	0.191667	0.0353333	0.024	0.0503333	0.175	0.169667	0.305333
0610040B10Rik	chr5	+	143330703	143330885	143329326	143329353	143332310	143332701	0.294667	0.440667	0.390333	0.216667	0.375	0.255333	0.263333	0.390667	0.485	0.178333	0.314333	0.402	0.405333	0.213333	0.411333	0.257	0.295	0.199667	0.300667	0.252	0.306667
0610040J01Rik	chr5	+	63888044	63888186	63876449	63876499	63896429	63896483	0	0.0633333	0	0.024	0	0.0126667	0.0783333	0.0636667	0	0	0.0393333	0.0786667	0.0183333	0.024	0.0126667	0.333333	NA	0	0	NA	0.333333
0610043K17Rik	chr4	+	101374257	101374323	101366989	101367139	101398889	101399181	NA	NA	1	NA	1	NA	NA	NA	NA	NA	NA	NA	NA	1	NA	0.798667	NA	1	NA	NA	0.201333
1110004F10Rik	chr7	+	116088273	116088414	116081357	116081412	116099439	116099523	0.333333	NA	NA	NA	NA	NA	NA	NA	NA	0.642667	NA	NA	NA	0.787333	NA	0.613333	0.73	1	NA	NA	0.666667
1110004F10Rik	chr7	+	116093024	116093256	116088273	116088414	116097761	116097953	NA	NA	NA	NA	NA	NA	NA	NA	NA	0.716333	NA	NA	1	0.557667	NA	0.766	NA	0.666667	NA	NA	0.442333
1110004F10Rik	chr7	+	116093024	116093256	116088273	116088414	116099439	116099523	NA	NA	NA	NA	NA	NA	NA	1	1	0.837333	NA	NA	NA	0.544667	NA	0.431	NA	0.557	NA	NA	0.569
1110004F10Rik	chr7	+	116097761	116097953	116081357	116081412	116099439	116099523	NA	NA	NA	NA	NA	NA	NA	0.937667	NA	NA	NA	NA	1	0.830667	NA	0.771	NA	1	NA	1	0.229
1110004F10Rik	chr7	+	116097761	116097953	116088273	116088414	116099439	116099523	1	NA	1	0.967	0.877	NA	NA	1	1	0.923333	1	1	1	0.825333	1	0.801	1	0.953333	NA	1	0.199
1110004F10Rik	chr7	+	116097761	116097953	116093024	116093256	116099439	116099523	NA	1	1	1	NA	NA	1	0.968	0.942	0.951667	1	1	1	0.876667	0.974667	0.918667	1	0.968	1	1	0.123333
1110017D15Rik	chr4	-	41507093	41507328	41505567	41505654	41507520	41507593	0.0266667	0.177333	NA	0.168	NA	0.190667	NA	0.212333	NA	0.196667	NA	0.167	NA	0.186333	NA	0.271333	0.382667	0.0293333	0.13	0.133667	0.356
1110017D15Rik	chr4	-	41507098	41507269	41505567	41505654	41507520	41507754	0.019	0.197	NA	0.205333	NA	0.364	NA	0.271	NA	0.277	NA	0.111333	NA	0.222667	NA	0.180333	NA	0.112	0.051	0.205	0.345
1110017D15Rik	chr4	-	41507098	41507328	41505567	41505654	41507520	41507764	0.016	0.284333	NA	0.332	NA	0.398667	NA	0.344667	NA	0.335	NA	0.218667	NA	0.300333	NA	0.327	0.383333	0.103	0.145	0.26	0.382667
1110017D15Rik	chr4	-	41507520	41507593	41505567	41505654	41508516	41508629	1	0.859333	NA	0.803333	1	0.989667	NA	0.924667	NA	1	NA	0.984667	NA	0.964667	NA	0.946667	NA	1	1	1	0.196667
1110017D15Rik	chr4	-	41508516	41508629	41505567	41505654	41511431	41511576	NA	0.876667	NA	0.875	NA	NA	NA	0.913333	NA	0.919667	NA	1	NA	1	NA	0.941667	NA	1	NA	NA	0.125
1110019D14Rik	chr6	+	13881272	13881381	13871568	13871627	13895091	13896422	0.987333	0.917333	1	1	0.955333	0.943333	0.991333	0.848	0.994	0.937667	0.982333	0.940667	0.988333	0.905667	0.956667	0.902	0.941	0.934667	0.984333	0.960667	0.152
1110032A03Rik	chr9	-	50764764	50764926	50764223	50764290	50767857	50768160	0.942333	0.817667	0.978333	0.947	0.968667	0.926	0.955	0.942667	0.96	0.970333	0.965333	0.957667	0.955667	0.967	0.981	0.978333	0.988667	0.951	0.976333	0.973	0.171
1110032A03Rik	chr9	-	50770800	50770958	50764223	50764926	50771151	50772055	NA	NA	NA	1	NA	NA	1	NA	1	NA	NA	1	NA	1	NA	1	NA	0.841667	1	NA	0.158333
1110034G24Rik	chr2	+	132691949	132692131	132686930	132686981	132750212	132750503	0.864667	0.860333	0.951333	0.932	0.926333	0.931667	0.965333	0.921333	0.911333	0.951	0.939333	0.899333	0.954	0.925667	0.984333	0.908333	0.955667	0.954333	0.955333	0.959333	0.124
1110037F02Rik	chr4	+	11545968	11546300	11534188	11534321	11549544	11550684	NA	NA	NA	NA	NA	NA	NA	NA	NA	NA	NA	NA	NA	1	NA	0.784667	NA	NA	NA	NA	0.215333
1110038B12Rik	chr17	-	34950697	34950847	34950242	34950475	34951884	34952434	0.750667	0.76	0.818333	0.779333	0.778	0.805667	0.720667	0.729	0.773667	0.770333	0.749333	0.757333	0.762	0.830333	0.799	0.833	0.759667	0.828	0.726333	0.822	0.112333
1110038B12Rik	chr17	-	34951884	34951925	34950697	34950847	34952135	34952173	0.863333	0.896333	0.897	0.882333	0.903667	0.877	0.869	0.913333	0.912667	0.908333	0.897667	0.878333	0.915333	0.966	0.925	0.952	0.907667	0.95	0.867	0.935667	0.102667
1110046J04Rik	chr13	+	33953316	33953541	33936031	33936097	33954706	33954825	1	1	NA	NA	1	NA	0.960667	0.941	1	1	0.903	1	1	1	0.833	1	0.957333	1	0.955	1	0.167
1110059E24Rik	chr19	-	21619108	21619215	21598754	21598868	21652606	21652976	0.851667	0.817667	0.824333	0.840667	0.828667	0.807	0.858333	0.826	0.864333	0.777	0.846	0.779667	0.841667	0.765333	0.844	0.747	0.84	0.757667	0.857667	0.851	0.117333
1300002E11Rik	chr16	+	21800714	21800836	21795849	21795975	21801280	21801356	1	1	0.879667	1	1	0.982333	0.981333	0.985	0.986333	1	0.984333	1	0.963333	1	0.97	0.985333	1	0.949	0.959333	0.972	0.120333
1300002E11Rik	chr16	+	21800774	21800836	21795849	21795975	21801280	21801356	1	1	0.846333	1	1	NA	0.973	0.983667	0.985	1	0.984333	1	0.948	1	0.959	0.976667	1	0.873667	0.942667	0.968667	0.153667
1300002E11Rik	chr16	+	21801280	21801356	21800714	21800836	21808677	21808820	0.894667	0.558333	0.818	0.882333	0.768333	NA	0.914333	0.900333	0.929667	0.850333	0.931333	0.815	0.832	0.905	0.842667	0.736333	0.922	0.831	0.961	0.902667	0.402667
1300002E11Rik	chr16	+	21802954	21803097	21801280	21801356	21808677	21808820	0.455	NA	0.479	0.335	0.711667	NA	0.664667	0.648667	0.536667	0.308	0.693667	0.576667	0.600333	0.271333	0.369333	0.281667	0.543667	0.412333	0.456667	0.445333	0.440333
1300017J02Rik	chr9	-	103277455	103277603	103274940	103274996	103279372	103279534	NA	0.896667	NA	0.882333	1	0.898667	NA	0.952	1	0.93	NA	0.940333	NA	1	NA	1	NA	0.911	1	NA	0.117667
1500002F19Rik	chr7	-	132893145	132893254	132874738	132875038	132931007	132931197	NA	NA	NA	NA	NA	NA	1	NA	0.936667	NA	1	NA	1	NA	1	NA	NA	NA	NA	0.666667	0.333333
1500002F19Rik	chr7	-	132893145	132893254	132889571	132890078	132931007	132931197	NA	NA	NA	NA	NA	NA	0.737	NA	1	NA	1	NA	1	NA	NA	NA	NA	NA	NA	NA	0.263
1500004A13Rik	chr3	-	88810637	88811002	88805288	88808272	88811213	88811369	0.46	0.811667	1	0.839	0.918	0.842667	1	0.808667	1	0.700333	0.988	0.772667	0.985	0.723667	0.928	0.709667	1	0.775333	0.342333	0.371	0.657667
1500004A13Rik	chr3	-	88810637	88811002	88805288	88808272	88832263	88832501	0.931333	NA	NA	NA	NA	NA	0.985333	1	NA	NA	NA	NA	NA	NA	NA	NA	NA	NA	0.758	0.749333	0.250667
1500004A13Rik	chr3	-	88811213	88811369	88807018	88808272	88832263	88832487	0.92	NA	NA	0.666667	NA	NA	0.769333	1	NA	0.811333	1	0.653333	NA	0.795	NA	0.901	NA	0.667667	0.851667	0.847	0.346667
1500009L16Rik	chr10	+	83737908	83737933	83722864	83723034	83757444	83757480	0.987333	0.992667	0.966	0.974333	0.988333	0.888667	0.932	0.970333	0.968	0.937667	0.971667	0.967333	0.980667	0.954333	0.976	0.972333	0.976667	0.974333	0.969333	0.976	0.104
1520401A03Rik	chr17	-	23705946	23706057	23705792	23705870	23706147	23706177	NA	NA	NA	NA	NA	NA	NA	NA	NA	NA	NA	NA	NA	NA	NA	NA	NA	NA	0.736333	1	0.263667
1520401A03Rik	chr17	-	23705997	23706057	23705792	23705870	23706147	23706177	0.666667	NA	NA	NA	NA	NA	NA	NA	NA	NA	NA	NA	NA	NA	NA	NA	NA	NA	0.929333	1	0.333333
1520401A03Rik	chr17	-	23708109	23708229	23707564	23707948	23708506	23708542	NA	NA	NA	NA	NA	NA	NA	NA	NA	NA	NA	NA	NA	NA	NA	NA	NA	NA	1	0.779333	0.220667
1520401A03Rik	chr17	-	23708109	23708230	23707796	23707948	23708506	23708542	NA	NA	NA	NA	NA	NA	NA	NA	NA	NA	NA	NA	NA	NA	NA	NA	NA	NA	1	0.779	0.221
1600020E01Rik	chr6	+	86550916	86551114	86532192	86532307	86564275	86564449	NA	NA	0.0446667	NA	0.715	NA	NA	0.497	NA	NA	0.65	NA	0.519333	0.524667	NA	0.319667	NA	0.487333	0.759667	0.674	0.715
1700001G11Rik	chr14	-	66296492	66296677	66295954	66296144	66296808	66296940	NA	NA	NA	0.056	0.450333	NA	NA	NA	NA	NA	0.074	NA	0.0306667	0.056	NA	NA	0.404	NA	0	NA	0.450333
1700001L05Rik	chr15	-	83358822	83358950	83357533	83358037	83365028	83365513	NA	NA	1	NA	1	NA	1	NA	0.916	NA	0.896667	NA	1	1	1	NA	NA	NA	1	0.732667	0.267333
1700001L05Rik	chr15	-	83363819	83363928	83357559	83358950	83365028	83365510	0.453667	0.666667	0.496	0.762	0.427667	NA	0.445333	0.621667	0.491333	0.827667	0.442667	0.563667	0.554667	0.428667	0.415667	0.221	0.6	0.644333	0.478333	0.509667	0.606667
1700001L05Rik	chr15	-	83365028	83365513	83358822	83358950	83366989	83367282	1	NA	0.523333	NA	1	NA	0.723333	0.667	0.708333	0.533	0.741	0.835333	0.595333	0.777	0.793667	0.588667	0.599	0.610333	1	0.863	0.476667
1700001O22Rik	chr2	-	30796108	30796211	30795572	30795805	30796400	30796566	1	NA	NA	NA	1	NA	0.922333	0.943667	1	1	0.952667	1	1	1	0.841	1	1	NA	1	NA	0.159
1700001O22Rik	chr2	-	30796545	30796566	30796144	30796283	30797867	30797980	1	NA	NA	NA	NA	NA	1	1	NA	NA	NA	NA	0.820333	NA	NA	NA	1	NA	0.931333	1	0.179667
1700003F12Rik	chr2	+	154549335	154549395	154548887	154549067	154549539	154550003	1	NA	NA	0.666667	NA	NA	NA	NA	NA	0.89	NA	NA	NA	NA	NA	NA	NA	NA	0.751	NA	0.333333
1700006J14Rik	chr10	+	120371256	120371304	120369874	120370024	120382064	120384336	NA	NA	NA	NA	NA	NA	NA	0.669667	NA	NA	NA	NA	NA	0.328667	NA	NA	NA	NA	NA	NA	0.341
1700007G11Rik	chr5	+	98346231	98346362	98329369	98329464	98498288	98498379	NA	NA	NA	1	NA	NA	NA	1	1	0.903	1	0.776	0.932	0.954667	0.807667	0.743667	0.924667	0.928667	0.333333	1	0.666667
1700007G11Rik	chr5	+	98784418	98784548	98737568	98737711	98801814	98802047	NA	NA	NA	NA	NA	NA	1	1	1	0.685333	NA	1	0.775	0.903333	0.915333	0.915333	0.788333	0.854333	0.776333	NA	0.314667
1700010H22Rik	chr5	-	98563645	98563695	98562781	98563094	98564176	98564242	1	NA	NA	NA	NA	NA	NA	NA	0.913667	NA	NA	NA	NA	NA	0.862667	NA	1	NA	0.955	0.894	0.137333
1700010I14Rik	chr17	+	9001127	9001186	8995197	8995257	9005191	9005245	NA	NA	NA	NA	NA	NA	0.801667	NA	NA	NA	NA	NA	1	NA	NA	NA	NA	NA	1	NA	0.198333
1700010I14Rik	chr17	+	9001769	9001945	9001127	9001186	9005191	9005245	0.899333	0.817333	0.695	0.604	0.785333	0.802	0.864	0.798667	0.877667	0.843333	0.914	0.834333	0.731667	0.612667	0.684667	1	0.875	0.919	0.780667	0.868667	0.396
1700012B09Rik	chr9	-	14761604	14761730	14758190	14758455	14766856	14766961	1	NA	NA	NA	NA	NA	NA	NA	NA	NA	NA	NA	NA	NA	NA	NA	NA	NA	0.853333	0.939333	0.146667
1700012B09Rik	chr9	-	14761621	14761730	14758190	14758455	14766856	14766961	NA	NA	NA	NA	NA	NA	NA	NA	NA	NA	NA	NA	NA	NA	NA	NA	NA	NA	0.751	0.909667	0.158667
1700013F07Rik	chr3	+	108542487	108542601	108537540	108537699	108543438	108543554	NA	NA	NA	NA	NA	NA	NA	NA	NA	0.666667	NA	NA	1	NA	NA	0.919333	NA	NA	NA	1	0.333333
1700016H13Rik	chr5	-	103649421	103649572	103648586	103648954	103654921	103655056	NA	NA	0.215	0.666667	0.858667	NA	0.408333	0.770667	0.547	NA	0.499	NA	0.224333	NA	NA	0.437333	0.728333	NA	0.668667	1	0.785
1700016H13Rik	chr5	-	103649421	103649576	103648428	103648954	103654921	103655056	NA	NA	0.273	0.666667	0.880333	NA	0.619667	0.800333	0.657667	1	0.691333	NA	0.292	NA	0.914667	0.436333	0.769667	NA	0.679	1	0.727
1700017B05Rik	chr9	-	57256385	57259140	57252321	57254329	57262428	57262599	0.520333	0.636667	0.626667	0.421667	0.552667	0.272667	0.550333	0.541333	0.596333	0.478333	0.598667	0.427667	0.619333	0.510333	0.424	0.545667	0.527333	0.722667	0.472333	0.450667	0.45
1700018A04Rik	chr13	-	31579569	31579658	31567396	31567613	31579942	31580153	NA	NA	NA	0.632	NA	NA	NA	0.467	NA	0.411	NA	0.559	NA	NA	NA	NA	NA	0.389667	NA	NA	0.242333
1700018A04Rik	chr13	-	31579569	31579658	31567473	31567610	31579942	31580153	NA	NA	NA	0.368333	NA	NA	NA	0.451667	NA	0.281	NA	0.543	NA	NA	NA	0.195	NA	0.152333	NA	NA	0.390667
1700024P16Rik	chr4	+	105010450	105010537	105003872	105003945	105013287	105013381	0.91	NA	NA	NA	1	NA	1	NA	1	NA	0.900667	NA	0.809333	NA	1	NA	1	NA	0.972333	0.908	0.190667
1700028E10Rik	chr5	+	151388461	151388538	151380388	151380523	151394490	151396164	NA	NA	NA	NA	0.666667	NA	NA	NA	NA	NA	NA	NA	NA	0.333333	NA	NA	NA	NA	0.460667	0.794	0.460667
1700028E10Rik	chr5	+	151428087	151428170	151424512	151424581	151430074	151430473	NA	NA	NA	NA	NA	NA	NA	NA	NA	NA	NA	NA	NA	1	1	0.743667	NA	1	NA	NA	0.256333
1700028J19Rik	chr7	-	44230781	44230915	44229932	44230641	44231325	44231472	0	NA	0.0246667	0.108667	0	NA	0.097	0.100667	0	0	0	0.096	0.0213333	0.108667	0	0.0606667	0	0	0.036	0.0423333	0.108667
1700028J19Rik	chr7	-	44230842	44230910	44229929	44230641	44231325	44231472	0	NA	0	0.131	0	NA	0.0323333	0	0.0976667	0	0	0.05	0	0	0	NA	0.190333	0	0.0123333	0.017	0.190333
1700028J19Rik	chr7	-	44230842	44230915	44229932	44230641	44231325	44231472	0	NA	0.0316667	0.186	0	NA	0.122333	0.0243333	0.0953333	0	0	0.143333	0.0276667	0	0	0.0453333	0.187	0	0.0573333	0.054	0.187
1700028P14Rik	chr19	-	23572484	23572542	23558759	23559037	23592108	23592177	NA	1	NA	NA	NA	NA	NA	0.877	NA	1	NA	1	NA	NA	NA	NA	NA	NA	1	NA	0.123
1700034H15Rik	chr1	-	191903541	191903585	191899969	191900918	191907059	191907527	NA	NA	NA	NA	1	NA	NA	NA	NA	NA	NA	NA	NA	NA	1	NA	0.666667	NA	NA	NA	0.333333
1700034P13Rik	chr1	+	9750357	9750405	9748588	9748645	9752448	9752564	NA	NA	0.333333	NA	0	NA	0	NA	NA	NA	0	NA	NA	NA	NA	NA	NA	NA	NA	NA	0.333333
1700034P13Rik	chr1	+	9751808	9751928	9748586	9748645	9752448	9752564	NA	NA	NA	NA	NA	NA	0	NA	0.333333	NA	0	NA	NA	NA	NA	NA	NA	NA	NA	NA	0.333333
1700037C18Rik	chr16	-	3897228	3897345	3895180	3895414	3906840	3907194	NA	NA	NA	NA	NA	NA	1	NA	1	NA	0.854667	1	NA	NA	NA	NA	1	NA	NA	NA	0.145333
1700037C18Rik	chr16	-	3907998	3908137	3907012	3907194	3908604	3908623	0.382667	NA	0.602333	0.517667	0.35	NA	0.356	0.39	0.203667	0.201333	0.422	0.365333	0.334	0.506667	0.399	0.393667	0.398667	0.545	0.415667	0.366	0.401
1700037H04Rik	chr2	-	131153593	131153710	131148280	131148294	131155641	131155779	0.869333	1	1	NA	NA	NA	1	NA	NA	NA	NA	NA	NA	NA	NA	NA	NA	NA	1	NA	0.130667
1700037H04Rik	chr2	-	131155641	131155779	131148155	131148294	131159952	131160042	0.946333	1	NA	NA	1	NA	1	NA	NA	NA	NA	NA	NA	NA	NA	NA	NA	NA	0.885	NA	0.115
1700040L02Rik	chr10	-	68436279	68436420	68430952	68431323	68436842	68436965	NA	NA	NA	NA	NA	NA	1	0.884333	NA	1	NA	1	NA	1	NA	NA	NA	NA	0.941667	1	0.115667
1700047F07Rik	chr4	+	107705622	107705898	107689732	107689738	107715216	107715338	NA	NA	1	NA	0.895333	NA	NA	NA	NA	NA	NA	NA	NA	NA	NA	NA	NA	NA	NA	NA	0.104667
1700047I17Rik2	chr12	+	55210731	55210798	55205679	55205853	55213839	55214076	NA	NA	NA	NA	NA	0.873667	NA	0.707667	NA	0.827667	0.840333	0.788333	NA	NA	NA	NA	NA	0.642667	NA	NA	0.231
1700047I17Rik2	chr12	+	55212181	55212279	55205679	55205853	55213839	55214076	0.901	0.831667	0.9	0.891	0.905333	0.923333	0.895	0.875	0.937667	0.908	0.940333	0.864333	0.908333	0.881333	0.857	0.867667	0.868	0.848667	0.946333	0.877667	0.114667
1700063D05Rik	chr9	+	41216734	41216813	41210705	41211034	41217284	41217374	NA	NA	1	NA	1	NA	1	NA	0.793333	1	0.882667	1	NA	NA	NA	NA	NA	NA	NA	NA	0.206667
1700066M21Rik	chr1	+	57379706	57379812	57377632	57377946	57380041	57380162	0.664667	NA	0.466	0.337333	0.333333	0.646333	0.33	0.84	0.415667	0.337667	0.136	0.448333	1	0.783667	0	0.813	0.431333	0.776	0.348	0.220667	1
1700067K01Rik	chr8	+	84003295	84003481	84003115	84003216	84003924	84004059	NA	NA	NA	NA	NA	NA	NA	1	NA	1	1	0.833667	NA	NA	NA	NA	NA	1	NA	NA	0.166333
1700086O06Rik	chr18	-	38239572	38239751	38238404	38239189	38240838	38240953	0.721667	0.797	0.535333	0.624333	0.698	0.533333	0.427333	0.436667	0.307333	0.334333	0.381333	0.383	0.522333	0.548	0.533	0.632667	0.66	0.661333	0.246667	0.539333	0.550333
1700086O06Rik	chr18	-	38239572	38239751	38238404	38239189	38249713	38250198	0.401333	0.336333	0.323333	0.461	0.365333	0.29	0.225	0.219	0.213	0.355667	0.224	0.246333	0.268667	0.178	0.276333	0.173	0.225667	0.171	0.214333	0.170667	0.290333
1700086O06Rik	chr18	-	38240838	38240953	38238404	38239189	38249713	38250198	0.461	0.516667	0.421	0.516	0.495333	0.273	0.46	0.398333	0.476333	0.565667	0.427333	0.464	0.439	0.224333	0.346333	0.291333	0.348	0.212667	0.597	0.35	0.384333
1700086O06Rik	chr18	-	38240838	38240953	38239572	38239751	38249713	38250198	0.593	0.759	0.628667	0.648333	0.753	0.702	0.752333	0.760333	0.729667	0.691333	0.729667	0.719667	0.781333	0.529333	0.636333	0.562333	0.75	0.627	0.806667	0.764667	0.277333
1700088E04Rik	chr15	-	79136306	79136489	79135636	79135765	79139237	79139300	0.744667	0.580333	0.790333	0.630333	0.746	0.905	0.969	0.829667	0.942667	0.731	0.963333	0.828	0.932667	0.758	0.896667	0.729333	0.953	0.817	0.573667	0.520333	0.448667
1700088E04Rik	chr15	-	79137625	79137723	79137131	79137312	79139237	79139300	NA	NA	NA	NA	NA	NA	NA	NA	NA	NA	NA	NA	NA	NA	NA	NA	NA	1	1	0.721667	0.278333
1700088E04Rik	chr15	-	79139237	79139300	79135636	79135765	79140768	79140992	NA	NA	1	NA	NA	NA	1	NA	0.799667	1	1	NA	NA	NA	1	NA	NA	NA	NA	NA	0.200333
1700088E04Rik	chr15	-	79139237	79139300	79135636	79135765	79140880	79140978	0.949	1	1	NA	0.965	0.888667	1	0.96	0.971333	0.965333	1	0.952333	0.967667	1	0.909667	NA	1	1	0.950333	0.973333	0.111333
1700088E04Rik	chr15	-	79139237	79139300	79135636	79135765	79140880	79141239	NA	1	1	1	0.965	0.888667	NA	0.96	0.971333	0.965333	NA	NA	0.967667	NA	0.909667	1	NA	NA	NA	NA	0.111333
1700088E04Rik	chr15	-	79139237	79139300	79135636	79135765	79141154	79141253	1	NA	NA	NA	NA	NA	0.799667	1	NA	NA	1	NA	1	0.857	NA	NA	0.857	NA	0.874667	0.899667	0.200333
1700088E04Rik	chr15	-	79140768	79140992	79135636	79135765	79141154	79141182	NA	NA	NA	NA	NA	NA	0.852	NA	1	NA	NA	NA	NA	NA	NA	NA	NA	NA	NA	NA	0.148
1700088E04Rik	chr15	-	79140768	79140992	79139237	79139300	79141154	79141182	1	NA	NA	NA	1	NA	1	1	1	1	0.924333	0.824	1	1	NA	NA	1	1	0.964	0.983667	0.176
1700088E04Rik	chr15	-	79140880	79140992	79135636	79135765	79141154	79141253	1	NA	NA	NA	NA	NA	0.871	1	1	NA	NA	NA	1	NA	1	NA	0.975667	NA	0.976667	NA	0.129
1700108F19Rik	chr14	+	76680125	76680320	76679454	76679598	76686833	76687092	NA	NA	NA	NA	NA	NA	1	NA	NA	NA	NA	NA	0.666667	NA	NA	NA	NA	0.666667	NA	NA	0.333333
1700109H08Rik	chr5	+	3580404	3580556	3577239	3577344	3582142	3582247	0.666667	NA	NA	NA	NA	0.700333	NA	NA	0.333333	NA	NA	NA	NA	1	1	NA	NA	NA	NA	NA	0.666667
1700109H08Rik	chr5	+	3582142	3582247	3577239	3577344	3584239	3584341	0.738	NA	0.858667	1	0.666667	NA	0.840333	0.694333	0.738	NA	0.54	NA	0.624333	1	NA	NA	0.910333	0.841	NA	0.640667	0.46
1700123M08Rik	chr4	+	11976443	11976587	11966573	11966683	11977456	11977570	NA	NA	NA	NA	NA	NA	1	1	NA	NA	NA	NA	1	NA	0.729667	1	1	NA	0.860667	1	0.270333
1700123M08Rik	chr4	+	11976443	11976587	11966573	11966683	11980141	11980408	NA	NA	NA	NA	1	NA	NA	NA	1	NA	NA	NA	1	0.772333	1	0.860667	0.860667	1	0.727	0.789333	0.273
1700123M08Rik	chr4	+	11976443	11976587	11966573	11966683	11993864	11993999	0.28	0.396333	0.528667	0.185333	0.467333	0.55	0.309333	0.392	0.467333	0.286333	0.422333	0.261333	0.307667	0.351	0.295333	0.441333	0.328333	0.326333	0.331667	0.405667	0.364667
1700123M08Rik	chr4	+	11977456	11977570	11966573	11966683	11980141	11980408	NA	NA	NA	NA	NA	NA	NA	NA	NA	NA	NA	NA	NA	NA	1	NA	0.666667	NA	0.789667	0.765333	0.333333
1700123M08Rik	chr4	+	11977456	11977570	11966573	11966683	11993864	11993999	0	NA	NA	NA	NA	NA	0	0.153	NA	NA	NA	NA	0.069	NA	0.0766667	0.197	0	NA	0.144	0.0233333	0.197
1700123M08Rik	chr4	+	11977456	11977570	11976443	11976587	11980141	11980408	0.666667	NA	0.666667	NA	0.837	NA	1	NA	0.740667	NA	NA	0.781	0.735667	NA	NA	NA	0.855667	0.645333	0.732333	0.8	0.354667
1700123M08Rik	chr4	+	11977456	11977570	11976443	11976587	11993864	11993999	0.503667	NA	0.762667	NA	0.328	0.333333	0.421333	0.198333	0.069	NA	0.181	0.553	0.572667	0.153	NA	0.256667	0.208333	0.552333	0.384	0.438	0.693667
1700123M08Rik	chr4	+	11980141	11980408	11966573	11966683	11993864	11993999	0.339	NA	0.598333	0.244667	0.303	0.333333	0.333	0.329667	0.365333	0.230333	0.314667	0.232667	0.145	0.200333	0.155333	0.112667	0.251667	0.204333	0.249667	0.318333	0.485667
1700123M08Rik	chr4	+	11980141	11980408	11976443	11976587	11993864	11993999	0.618667	0.333333	0.683333	0.712667	0.363333	NA	0.456	0.366	0.205	0.660333	0.29	0.572667	NA	0.322333	NA	0.173	0.400667	0.527333	0.376	0.572	0.539667
1700123M08Rik	chr4	+	11980141	11980408	11977456	11977570	11993864	11993999	1	NA	0.375	1	1	NA	1	0.616667	0.829667	0.735667	0.766	0.623333	0.796333	1	0.863	0.520333	1	0.712667	0.660333	0.926	0.625
1700125H20Rik	chr11	+	85178256	85178452	85174016	85174116	85180885	85181145	NA	NA	NA	NA	NA	NA	NA	NA	NA	NA	0.812667	1	NA	NA	NA	NA	NA	NA	NA	NA	0.187333
1810006J02Rik	chr1	+	98134292	98134339	98133511	98133601	98138052	98138189	NA	NA	NA	NA	NA	NA	NA	NA	NA	1	NA	NA	NA	0.864	NA	0.945333	NA	1	NA	NA	0.136
1810013D15Rik	chr3	+	157926788	157927025	157925710	157926246	157928362	157928450	0.853	0.780333	0.490667	0.836333	0.641	NA	0.835667	1	0.837667	1	0.930667	0.639	0.73	0.902333	0.796667	0.666667	0.915333	NA	1	0.802667	0.509333
1810014B01Rik	chr10	+	86688533	86689138	86685879	86685996	86692217	86692305	0.957667	1	0.920667	0.936333	0.985333	1	0.916	0.958	0.831667	0.947667	0.913333	0.951	0.928667	0.947667	0.957667	1	0.986667	0.978	0.940333	0.915	0.168333
1810019D21Rik	chr8	+	106136530	106136688	106135399	106135732	106137166	106137350	0.353667	NA	0.760333	NA	0.756	NA	0.519667	NA	0.537	NA	0.605333	NA	0.343667	NA	0.577667	NA	0.460333	NA	0.562	0.570667	0.416667
1810019D21Rik	chr8	+	106137468	106137544	106137166	106137350	106137827	106137891	0.0493333	NA	0.0543333	NA	0.078	NA	0.117	NA	0.0953333	NA	0.116	NA	0.143	NA	0.112667	NA	0.119	NA	0.155667	0.203	0.153667
1810021B22Rik	chr15	-	89074072	89074198	89071570	89071718	89075098	89075149	0.274333	NA	NA	NA	NA	NA	0.463667	NA	0.666	NA	0.444	0.281667	0.380667	0.110667	0.399667	NA	0.666667	0.309	0.463333	0.551	0.556
1810021B22Rik	chr15	-	89074072	89074198	89071570	89071748	89075098	89075149	0.204667	0.333333	0.0523333	0.022	0.192	NA	0.485	0.267667	0.282333	0.072	0.213	0.318	0.277667	0.209	0.152333	0.218333	0.221333	0.193667	0.371333	0.232333	0.463
1810041L15Rik	chr15	-	84435144	84435282	84420136	84420232	84446361	84446545	0.153	NA	NA	NA	NA	NA	NA	NA	NA	NA	NA	NA	NA	NA	NA	NA	NA	NA	0.123667	0.342667	0.219
1810043G02Rik	chr10	+	77979752	77980051	77978692	77978781	77980500	77980522	0.703333	0.727	1	0.754667	0.968	0.888667	0.610333	0.603333	0.742667	0.776	0.830667	0.719667	0.93	0.674	0.826667	0.834667	0.903333	0.809	0.767333	0.927667	0.396667
1810043G02Rik	chr10	+	77979752	77983041	77978670	77978781	77984418	77985434	NA	NA	NA	NA	NA	NA	NA	NA	NA	NA	NA	1	NA	1	NA	1	1	0.835333	NA	NA	0.164667
1810043G02Rik	chr10	+	77985038	77985096	77983515	77983591	77986717	77986905	NA	NA	NA	NA	NA	NA	NA	NA	NA	NA	NA	NA	NA	NA	NA	NA	NA	NA	0.666667	1	0.333333
1810058I24Rik	chr6	+	35252955	35253045	35252715	35252782	35261158	35261637	NA	NA	0.822	1	NA	NA	0.825333	0.745667	0.481333	0.661667	0.899667	NA	0.789333	0.572333	0.545333	0.846	0.418333	0.445667	0.456	NA	0.581667
1810059H22Rik	chr5	-	148959147	148959210	148958669	148958730	148963893	148963995	NA	NA	NA	NA	NA	NA	NA	NA	NA	NA	NA	NA	1	NA	NA	NA	0.799667	1	NA	NA	0.200333
1810062O18Rik	chr14	+	20550070	20550175	20546113	20546344	20561985	20562096	0	NA	0	NA	0.117333	NA	0	0.117333	0	0.018	0.0326667	0	0.133333	0	0	0	0.036	0	0.024	0.04	0.133333
1810062O18Rik	chr14	+	20565010	20565047	20564780	20564839	20569869	20570022	NA	NA	NA	NA	NA	NA	NA	0.931333	NA	1	NA	NA	NA	1	NA	NA	NA	0.666667	NA	NA	0.333333
1810062O18Rik	chr14	+	20565010	20565047	20564780	20564839	20570341	20570543	1	NA	1	1	1	NA	0.931333	1	0.944667	0.948	0.918333	1	1	0.965	1	0.830667	0.958	0.666667	0.918333	0.940667	0.333333
1810062O18Rik	chr14	+	20569869	20570022	20564780	20564839	20570341	20570680	NA	NA	NA	NA	NA	NA	0.858	1	NA	0.948	NA	1	NA	0.963333	NA	0.786667	0.951333	0.889667	NA	NA	0.213333
1810062O18Rik	chr14	+	20569869	20570022	20565010	20565047	20570341	20570680	0.146667	NA	0.218	0.27	0.272667	0.809333	0.434	0.341667	0.284333	0.415	0.377667	0.346	0.415667	0.474333	0.375	0.405333	0.26	0.522333	0.317667	0.366667	0.662667
1810064F22Rik	chr9	-	22199976	22200043	22196962	22197215	22206150	22206276	NA	NA	NA	NA	NA	NA	NA	NA	NA	NA	NA	NA	0.666667	NA	NA	NA	NA	NA	0.767667	NA	0.101
1810064F22Rik	chr9	-	22208882	22208949	22206150	22206276	22213722	22213839	NA	NA	NA	NA	NA	NA	NA	NA	NA	NA	NA	NA	NA	NA	NA	NA	0.141333	NA	0	0.481	0.481
2010001A14Rik	chr11	-	57796025	57796173	57795498	57795794	57796311	57796397	0.781333	0.538333	0.814333	0.701	0.727667	0.898	0.694667	0.761333	0.782	0.692667	0.750667	0.781333	0.828	0.861667	0.789667	0.903667	0.782667	0.829	0.736333	0.851333	0.365333
2010001A14Rik	chr11	-	57796025	57796173	57795498	57795794	57801233	57801398	0.779667	0.924667	0.971	0.792333	0.892333	0.644667	0.869	0.879667	0.859667	0.663333	0.860333	0.739667	0.876667	0.766333	0.836667	0.756	0.852667	0.697	0.878	0.762	0.326333
2010001A14Rik	chr11	-	57796311	57796397	57795518	57795794	57801233	57801414	0.658333	0.901	0.955667	0.774	0.861	0.530667	0.879333	0.795333	0.784	0.606	0.818333	0.655	0.834667	0.527333	0.783667	0.538333	0.755333	0.537333	0.856333	0.617	0.428333
2010001A14Rik	chr11	-	57796311	57796397	57796025	57796173	57801233	57801414	0.792	0.625	0.884	0.769667	0.808	0.797667	0.826333	0.627667	0.696	0.623	0.707667	0.67	0.747	0.534333	0.734	0.692333	0.639	0.675	0.847333	0.751667	0.349667
2010005H15Rik	chr16	+	36253013	36253111	36221561	36221646	36255540	36255642	NA	NA	NA	NA	NA	NA	NA	1	NA	0.923667	1	NA	1	0.666667	NA	NA	NA	NA	NA	NA	0.333333
2010005H15Rik	chr16	+	36253013	36253111	36238823	36238885	36255540	36255642	NA	NA	NA	NA	NA	NA	NA	1	NA	0.912333	0.666667	NA	NA	NA	1	NA	NA	NA	NA	NA	0.333333
2010107G23Rik	chr10	-	62110235	62110314	62109883	62110012	62134488	62134706	1	1	1	1	1	0.793333	1	1	0.99	0.966333	1	0.970667	1	0.974333	1	1	1	0.989667	0.989333	0.985667	0.206667
2010109A12Rik	chr5	+	93208098	93208194	93206517	93206723	93213228	93213475	0.74	NA	1	1	1	0.666667	1	NA	1	NA	NA	1	1	1	NA	1	NA	NA	1	0.800333	0.333333
2010111I01Rik	chr13	+	63068039	63068285	63061034	63061194	63156545	63156735	1	0.839667	0.960333	0.922667	0.926667	1	0.861	0.948667	1	0.855	1	0.956	0.963333	0.878667	0.955	0.912	1	0.897	1	0.958667	0.160333
2010111I01Rik	chr13	+	63068039	63068285	63061034	63061194	63190478	63190581	1	1	NA	NA	NA	NA	1	0.926667	NA	1	NA	1	0.834333	0.905333	1	NA	1	1	0.907	1	0.165667
2010111I01Rik	chr13	+	63156545	63156735	63068039	63068285	63170940	63171047	NA	0.927	NA	NA	NA	NA	NA	0.892	1	0.935333	1	0.970667	NA	0.857	NA	NA	0.880667	0.949	NA	0.949	0.143
2010111I01Rik	chr13	+	63156545	63156735	63068052	63068285	63170940	63171047	1	0.927	1	1	0.900667	0.967	0.965667	0.892	1	0.935333	1	0.970667	0.897333	0.857	0.934667	0.975667	0.880667	0.949	0.973333	0.949	0.143
2010111I01Rik	chr13	+	63156545	63156735	63068052	63068285	63190478	63190581	NA	NA	NA	NA	NA	NA	0.814	NA	NA	NA	NA	NA	0.860333	1	0.891667	NA	0.813	NA	NA	0.8	0.2
2010111I01Rik	chr13	+	63170940	63171047	63068039	63068285	63190478	63190581	0.921333	0.925667	0.676667	0.973	0.832333	1	0.828333	0.945667	0.913	0.951667	0.577333	0.946667	0.926	NA	0.882	1	0.918667	0.93	0.934	0.922	0.422667
2010111I01Rik	chr13	+	63170940	63171047	63068052	63068285	63190478	63190581	NA	0.925667	NA	NA	NA	NA	NA	0.945667	0.913	0.951667	0.577333	0.946667	0.926	1	NA	NA	0.918667	0.93	NA	0.922	0.422667
2010111I01Rik	chr13	+	63240086	63240155	63210105	63210166	63282141	63282258	NA	NA	NA	NA	NA	NA	NA	NA	NA	NA	NA	0.854	NA	0.758333	NA	0.886333	NA	0.939667	NA	NA	0.181333
2010111I01Rik	chr13	+	63298711	63298856	63282141	63282258	63323778	63326096	NA	NA	NA	NA	NA	NA	NA	1	NA	NA	NA	NA	1	0.666667	NA	NA	NA	NA	NA	NA	0.333333
2010204K13Rik	chrX	-	7424129	7424284	7412105	7412532	7429506	7429674	0.982667	1	0.975333	1	0.971667	1	0.957	NA	0.984667	1	0.924667	1	0.952	NA	1	0.800333	0.967	1	0.988667	0.979667	0.199667
2010300C02Rik	chr1	-	37628216	37628426	37623760	37626068	37631320	37631482	0.913667	NA	1	NA	1	NA	1	0.875667	1	1	0.939	0.883667	0.939	1	0.969	1	0.866333	1	0.971667	0.954333	0.133667
2010300C02Rik	chr1	-	37676341	37676779	37644560	37644640	37719569	37719795	0.102667	NA	NA	NA	NA	NA	NA	NA	NA	NA	NA	0	0.333333	0.170667	0.362	0.351	0.0333333	0.183667	NA	0.0843333	0.362
2010315B03Rik	chr9	-	124295097	124295158	124293640	124294101	124295357	124295484	0.975333	0.925	0.936667	0.967333	0.928667	0.962333	0.979	0.960667	0.978667	0.866667	0.923	0.979	0.959667	0.973667	0.978	0.863	0.978	0.976333	0.976333	0.996333	0.133333
2010315B03Rik	chr9	-	124295357	124295484	124291803	124294101	124311675	124311899	NA	NA	NA	NA	NA	NA	NA	NA	NA	NA	NA	NA	NA	0.888333	NA	NA	NA	1	NA	NA	0.111667
2010315B03Rik	chr9	-	124295357	124295484	124293640	124294101	124311675	124311899	NA	NA	NA	NA	NA	NA	NA	1	NA	NA	NA	NA	1	0.888333	NA	1	NA	NA	NA	1	0.111667
2010315B03Rik	chr9	-	124304655	124304718	124295357	124295484	124312559	124312642	0.204667	0.0833333	0.058	0.575667	0.177	0.733333	0.202333	0.0603333	0.292	0.131	0.491667	0.143667	0.143667	0.216333	0.232333	NA	0.44	0.0833333	0.131	0.199667	0.675333
2010315B03Rik	chr9	-	124311675	124311750	124295097	124295158	124312559	124312671	NA	NA	NA	NA	NA	NA	NA	NA	NA	NA	NA	NA	0.795	NA	NA	NA	1	NA	NA	1	0.205
2010315B03Rik	chr9	-	124311675	124311750	124295357	124295484	124312559	124312671	0.711	0.163667	0.249333	0.849333	0.624667	0.795	0.575333	0.658667	0.52	0.54	0.844333	0.523667	0.699333	0.606333	0.616667	0.749	0.810333	0.560667	0.591333	0.732667	0.685667
2210011C24Rik	chr8	-	84010710	84010772	84010221	84010492	84011140	84012158	1	NA	NA	NA	NA	NA	NA	NA	NA	NA	NA	NA	NA	NA	NA	NA	NA	NA	0.614333	NA	0.385667
2210016L21Rik	chr5	+	114946017	114946116	114942203	114942355	114947162	114947253	NA	NA	NA	NA	NA	NA	NA	NA	NA	NA	NA	NA	NA	NA	NA	0.875333	NA	1	NA	NA	0.124667
2210408F21Rik	chr6	+	31336803	31336857	31335990	31336062	31337229	31337373	NA	NA	0.274	NA	NA	NA	NA	NA	NA	NA	0.470333	NA	NA	NA	NA	NA	NA	NA	NA	NA	0.196333
2210408I21Rik	chr13	+	77245200	77245362	77192553	77193223	77254122	77254217	0.941667	0.916667	0.955667	0.906667	0.885333	0.958333	0.983333	0.886333	0.924667	0.934	0.968	0.927	0.944667	0.951667	0.933	0.927667	0.906333	0.990333	0.916	0.937	0.105
2310001H17Rik	chr6	-	129233063	129233153	129212735	129216536	129237738	129237857	0.666667	NA	NA	NA	NA	NA	1	NA	NA	NA	NA	NA	NA	1	NA	NA	1	NA	NA	NA	0.333333
2310002F09Rik	chr7	-	43758438	43758584	43756026	43756231	43797419	43797945	0.715333	NA	0.841	NA	0.759	NA	0.682333	NA	0.815333	NA	0.821333	NA	0.758	NA	0.750667	NA	0.693	NA	0.634333	0.709333	0.206667
2310007B03Rik	chr1	-	93154486	93154640	93152916	93153273	93155978	93156204	0.892333	NA	0.874	NA	0.782	NA	0.905667	NA	0.951	NA	0.861333	NA	0.881333	NA	0.852	NA	0.954	NA	0.873333	0.947667	0.172
2310010J17Rik	chr7	-	90126927	90127044	90124821	90125032	90127596	90127656	NA	1	1	0.859667	NA	1	1	0.891333	NA	1	NA	1	1	0.868667	NA	1	NA	1	1	1	0.140333
2310010J17Rik	chr7	-	90126927	90127044	90124821	90125032	90129871	90129984	0.179667	0.250333	0.440667	0.283667	0.155667	0.357	0.228333	0.145	0.184667	0.176	0.191667	0.217	0.0873333	0.118333	0.148	0.144	0.166667	0.124	0.201	0.111333	0.353333
2310022A10Rik	chr7	+	27574590	27574740	27560551	27560603	27580336	27580420	NA	NA	NA	NA	NA	NA	1	0.801667	NA	NA	NA	1	NA	1	NA	NA	NA	NA	NA	NA	0.198333
2310022A10Rik	chr7	+	27574590	27574740	27565657	27565728	27580336	27580420	NA	NA	NA	NA	NA	NA	NA	NA	NA	1	NA	NA	NA	1	1	0.898	NA	1	NA	NA	0.102
2310030G06Rik	chr9	-	50742260	50742298	50739690	50740749	50746441	50746521	0.978667	NA	0.920667	NA	0.888333	NA	0.921	1	0.832	NA	0.921333	NA	0.981333	NA	0.953333	NA	0.858333	NA	0.757	0.982	0.243
2310030G06Rik	chr9	-	50742260	50742298	50741295	50741360	50746441	50746521	0.858333	NA	0.826333	NA	0.885	NA	0.873667	1	0.846333	NA	0.843333	NA	0.827667	0.961667	0.779333	0.759	0.810333	0.759	0.89	0.895667	0.241
2310035C23Rik	chr1	+	105686948	105687020	105678162	105678252	105687129	105687141	0.944	0.827	0.989333	0.970333	1	1	0.984667	0.973	1	0.995	1	1	0.987	0.984	1	1	1	0.995667	0.956667	0.956667	0.173
2310035C23Rik	chr1	+	105692211	105692303	105691905	105692109	105692883	105693177	0.933667	1	0.938667	0.873333	0.931333	0.828667	0.927	0.878667	0.927333	0.916333	0.907333	0.892667	0.929667	0.920667	0.878	0.894	0.871333	0.929333	0.913667	0.923333	0.171333
2310035C23Rik	chr1	+	105740434	105740517	105735922	105736022	105741012	105741095	1	NA	0.890333	1	0.971667	1	0.944667	1	0.914333	0.973	0.947	0.983	0.866	1	0.913	1	0.860333	1	0.966333	0.892667	0.139667
2310035C23Rik	chr1	+	105740434	105740517	105735922	105736022	105743210	105743349	1	NA	0.939333	0.954333	0.886	NA	NA	NA	0.968333	NA	NA	NA	NA	NA	NA	NA	NA	NA	NA	NA	0.114
2310035C23Rik	chr1	+	105741012	105741095	105735922	105736022	105741296	105741360	1	NA	1	NA	1	NA	0.869	NA	0.85	0.743667	0.816667	NA	0.933667	1	0.902333	1	1	1	0.962333	0.968667	0.256333
2310035C23Rik	chr1	+	105741012	105741095	105735922	105736022	105743210	105743349	NA	NA	NA	NA	NA	NA	0.431333	NA	0.663667	NA	0.455333	NA	0.526667	NA	NA	NA	0.616333	NA	1	NA	0.568667
2310035C23Rik	chr1	+	105741012	105741095	105740434	105740517	105741296	105741360	0.1	0.0553333	0.0613333	0.0463333	0.0436667	0.0513333	0.0626667	0.0343333	0.0646667	0.0396667	0.0616667	0.0146667	0.109667	0.036	0.143333	0.0203333	0.108333	0.0453333	0.059	0.113	0.128667
2310057M21Rik	chr7	-	131348691	131351102	131343185	131343804	131357459	131357666	1	1	1	0.674333	NA	1	0.961	1	1	0.956667	1	1	1	NA	NA	1	NA	NA	1	NA	0.325667
2310057M21Rik	chr7	-	131348691	131351102	131343185	131343804	131361732	131361936	NA	NA	NA	NA	NA	NA	NA	NA	NA	NA	NA	NA	NA	NA	1	0.696667	NA	1	NA	NA	0.303333
2310061I04Rik	chr17	-	35896259	35896445	35895919	35896072	35897044	35897103	0.100333	0.0626667	0.0906667	0.129333	0.0453333	NA	0.121	0.21	0.194	0.231667	0.063	0.156	0.092	0.092	0.0633333	0.053	0.0926667	0.099	0.055	0.076	0.186333
2410002F23Rik	chr7	+	44247237	44247416	44246734	44246808	44248251	44248295	0.960333	0.945333	0.972	0.955	0.967333	0.969	0.984	0.904	0.950333	0.967667	0.991	0.948667	0.993	0.836667	0.983333	0.926	0.981333	0.911	0.970333	0.936	0.156333
2410002F23Rik	chr7	+	44247237	44247416	44246786	44246823	44248251	44248295	0.514333	0.642333	NA	0.465333	NA	0.525667	NA	0.516	NA	NA	NA	NA	NA	NA	NA	NA	NA	NA	NA	NA	0.177
2410002F23Rik	chr7	+	44247237	44247416	44246807	44246823	44248251	44248295	0.514333	NA	0.497333	0.465333	0.426333	0.525667	0.509333	0.516	0.577667	0.451	0.485	0.481333	0.485667	0.370333	0.637333	0.364667	0.577333	0.357667	0.460333	0.47	0.279667
2410002F23Rik	chr7	+	44247250	44247416	44246753	44246808	44248251	44248295	0.961333	0.947667	0.971	0.957	0.967667	0.973	0.984	0.902	0.948667	0.968	0.991	0.951	0.992333	0.862667	0.982333	0.932333	0.978667	0.919	0.968667	0.935333	0.129667
2410002F23Rik	chr7	+	44247250	44247416	44246786	44246823	44247909	44248059	0.919	0.883667	0.943	0.964667	0.875	0.850333	0.903	0.889333	0.897	0.912667	0.901	0.889333	0.887333	0.920333	0.955	0.898	0.935	0.907	0.908	0.92	0.114333
2410002F23Rik	chr7	+	44247909	44248059	44246786	44246823	44248251	44248295	0.383	0.501333	0.417667	0.457333	0.353333	0.445667	0.362333	0.478667	0.431	0.416333	0.426	0.429333	0.347333	0.280333	0.528667	0.342333	0.449333	0.288	0.365333	0.364333	0.248333
2410002F23Rik	chr7	+	44247909	44248059	44246798	44246808	44248251	44248295	0.935667	0.885667	0.962	0.959	0.964	0.967667	0.969	0.903	0.919667	0.969667	0.983333	0.947333	0.989333	0.789	0.983667	0.921	0.973667	0.874	0.961333	0.920667	0.200333
2410002F23Rik	chr7	+	44247909	44248059	44247230	44247416	44248251	44248295	0.404333	0.414333	0.416667	0.560667	0.427	0.425333	0.415	0.492	0.426	0.533333	0.482667	0.499	0.433667	0.376667	0.439333	0.484667	0.397667	0.423	0.439	0.464333	0.184
2410004B18Rik	chr3	+	145938542	145938669	145938189	145938328	145938897	145939096	0.171333	0.166667	0.261	0.195667	0.243333	0.166667	0.227	0.305333	0.281333	0.286333	0.240333	0.229	0.328	0.340333	0.329333	0.306	0.303	0.337667	0.196667	0.255333	0.173667
2410004P03Rik	chr12	-	17008272	17008312	17007019	17007236	17011127	17011351	0.810333	NA	0.844	NA	0.844	NA	1	0.917333	0.646	0.917333	0.867333	1	0.930333	1	1	0.810333	0.682667	0.774333	0.969333	0.803333	0.354
2410018L13Rik	chr12	-	22983060	22983185	22982385	22982546	22992787	22992848	0.294333	1	0.786333	NA	0.878667	NA	0.637667	0.444333	0.611667	0.8	0.654333	0.611	0.908667	1	0.821667	0.282667	0.736	NA	0.553667	0.860667	0.717333
2410018L13Rik	chr12	-	22992787	22992848	22958351	22958457	23009844	23010209	1	NA	1	0.827	NA	0.909667	1	0.960333	1	0.955	NA	0.881667	0.971667	NA	NA	NA	0.952667	NA	0.978	NA	0.173
2410018L13Rik	chr12	-	22992787	22992848	22958351	22958457	23009844	23010243	1	NA	1	NA	0.933667	0.909667	NA	0.960333	1	0.955	1	0.881667	0.971667	0.930667	0.875667	1	0.952667	0.909667	0.978	0.911333	0.124333
2410018L13Rik	chr12	-	22993050	22993177	22992787	22992848	23009844	23009998	0.860333	0.827333	0.844667	0.794667	0.819	0.864333	0.854333	0.833	0.868667	0.780667	0.848	0.802667	0.804333	0.761667	0.843	0.714	0.863333	0.737667	0.859333	0.823667	0.154667
2410089E03Rik	chr15	+	8186082	8186332	8182115	8182298	8186498	8186651	0.984333	0.993333	0.926333	0.962333	0.981667	1	0.937667	0.958667	0.967667	0.970667	1	0.975667	0.978	0.985	1	0.863333	0.987	0.950333	0.99	1	0.136667
2410089E03Rik	chr15	+	8194323	8194488	8188796	8188877	8199180	8199339	0.962	0.849	0.976333	0.963	0.995333	1	0.969667	0.967	0.969667	0.982333	0.955667	0.977667	0.985	0.996	0.959333	0.969667	0.992	0.971333	0.988333	0.976	0.151
2410124H12Rik	chr16	+	92492013	92492175	92478741	92478968	92497049	92497366	0.822	NA	0.380333	NA	0.766	NA	0.65	NA	0.611667	NA	0.446667	NA	0.487	NA	0.471667	0.666667	0.548667	NA	0.482333	0.396667	0.441667
2610005L07Rik	chr8	-	20399095	20399468	20385781	20388402	20401376	20401496	0.783	NA	0.795	0.947	0.744	0.909333	0.959667	0.937	0.823	0.917	0.873333	0.876333	0.802333	0.766333	0.774333	0.783	1	0.885333	0.853	0.947	0.256
2610005L07Rik	chr8	-	20401376	20401496	20399095	20399468	20405120	20405419	NA	NA	NA	0.981333	1	0.775333	1	1	1	1	0.985333	0.966333	1	1	0.960667	0.983667	1	0.993	NA	NA	0.224667
2610020H08Rik	chr7	+	119799564	119799677	119794005	119794502	119802740	119802837	0.943333	0.607333	0.981667	0.617333	0.739333	NA	0.919667	0.868333	0.786333	0.855	0.823	0.772333	0.743	0.838333	0.676	0.815667	0.878667	0.816333	0.835667	0.798333	0.374333
2610020H08Rik	chr7	+	119799564	119799677	119794005	119794502	119805142	119805286	0.383	0.191333	0.433333	0.216	0.383	0.183	0.431333	0.429667	0.347	0.399333	0.401667	0.373333	0.321	0.335333	0.383	0.324333	0.337	0.232	0.612	0.360667	0.429
2610020H08Rik	chr7	+	119799564	119799677	119794005	119794502	119827302	119827379	NA	0.756333	NA	1	NA	NA	NA	NA	NA	0.923	NA	NA	NA	NA	NA	NA	NA	NA	NA	NA	0.243667
2610020H08Rik	chr7	+	119801229	119801356	119794005	119794502	119802740	119802837	0.966333	0.704667	0.983333	0.805	0.793667	0.774667	0.918667	0.892333	0.871	0.877333	0.856	0.808	0.845	0.839667	0.717	0.830667	0.897	0.890333	0.875667	0.847667	0.278667
2610020H08Rik	chr7	+	119801229	119801356	119799564	119799677	119802740	119802837	0.912667	0.848333	0.836	0.963333	0.825667	0.978	0.85	0.912667	0.915333	0.912667	0.942333	0.857333	0.905333	0.909667	0.859333	0.865	0.908	0.865333	0.936	0.909333	0.152333
2610020H08Rik	chr7	+	119801229	119801356	119799564	119799677	119805142	119805286	0.869	1	0.944	0.916333	1	1	0.933	0.987	1	0.919	0.984	0.962667	0.913	0.939333	1	0.944	1	1	0.949333	0.963667	0.131
2610020H08Rik	chr7	+	119802740	119802837	119794005	119794502	119805142	119805286	0.516333	NA	0.661	0.531	0.674333	0.639667	0.583667	0.581333	0.583	0.595	0.576	0.572	NA	0.511	NA	0.485667	0.546	0.525667	0.731333	NA	0.245667
2610020H08Rik	chr7	+	119802740	119802837	119794357	119794502	119805142	119805286	0.516333	0.603667	NA	0.531	NA	0.639667	0.583667	0.581333	0.583	NA	0.576	NA	0.516333	0.511	0.658	0.485667	0.546	NA	0.731333	0.570333	0.245667
2610020H08Rik	chr7	+	119802740	119802837	119799564	119799677	119805142	119805286	0.898667	1	0.974667	0.949667	1	1	0.978	0.990667	1	0.960667	0.985333	0.98	0.964	0.97	1	0.964333	1	1	0.969	0.981667	0.101333
2610020H08Rik	chr7	+	119805142	119805286	119794150	119794502	119819431	119819547	0.970333	1	NA	NA	1	1	NA	1	0.935667	1	1	0.938333	1	1	0.899667	0.984	0.969	0.964333	NA	NA	0.100333
2610020H08Rik	chr7	+	119805142	119805286	119794150	119794502	119827302	119827376	NA	0.813667	NA	NA	NA	1	NA	1	NA	NA	NA	NA	NA	NA	NA	NA	NA	NA	NA	NA	0.186333
2610020H08Rik	chr7	+	119819431	119819547	119805142	119805286	119827302	119827379	NA	NA	NA	NA	NA	NA	NA	NA	NA	NA	NA	0.812667	NA	0.0686667	NA	0.735333	NA	NA	NA	NA	0.744
2610020H08Rik	chr7	+	119819431	119819547	119805142	119805286	119832670	119832775	NA	NA	NA	NA	NA	NA	NA	0.666667	NA	NA	NA	0.869667	NA	NA	NA	1	NA	NA	NA	NA	0.333333
2610020H08Rik	chr7	+	119823755	119823894	119805142	119805286	119827302	119827376	NA	NA	1	1	NA	NA	0.848667	0.942	0.936667	0.922667	1	0.901	0.884667	0.601	NA	0.862333	NA	0.805	0.884667	0.939333	0.399
2610020H08Rik	chr7	+	119824044	119824139	119819431	119819547	119827302	119827379	NA	NA	NA	NA	NA	NA	1	0.898	NA	1	NA	1	NA	0.94	NA	1	NA	NA	1	1	0.102
2610020H08Rik	chr7	+	119824044	119824139	119823755	119823894	119827302	119827379	0.842	0.628667	0.712333	0.624333	0.677667	0.821333	0.688333	0.826333	0.758	0.769	0.825333	0.774333	0.806	0.835667	0.926333	0.864667	0.81	0.903	0.796	0.849	0.302
2610020H08Rik	chr7	+	119825535	119825638	119823755	119823894	119827302	119827376	0.890333	NA	NA	NA	0.848	0.874333	NA	0.870333	0.834667	0.78	0.887333	0.770333	0.877	0.893667	0.923333	0.904	0.880333	0.934667	NA	NA	0.164333
2610020H08Rik	chr7	+	119825535	119825638	119823875	119823894	119827302	119827376	0.890333	0.856	0.841667	0.759333	0.848	0.874333	0.769	0.870333	0.834667	0.78	0.887333	NA	0.877	0.893667	NA	NA	0.880333	NA	0.815667	0.900333	0.141
2610020H08Rik	chr7	+	119825535	119825638	119824044	119824139	119827302	119827376	0.907	0.983333	0.98	0.922	0.980667	0.940667	0.950333	0.931667	0.966667	0.958333	0.968667	0.947	0.972	0.945	0.875667	0.937	0.985	0.956667	0.965667	0.976	0.109333
2610020H08Rik	chr7	+	119828091	119828206	119827302	119827376	119832670	119832775	0.446667	0.275333	0.422	0.358	0.48	0.334667	0.529667	0.434667	0.515667	0.485	0.546333	0.513	0.455	0.348	0.489333	0.423667	0.515667	0.349667	0.574667	0.566333	0.299333
2610020H08Rik	chr7	+	119843241	119843334	119834263	119834401	119843847	119844064	0.463	0.492	0.506333	0.493	0.536	0.218	0.568	0.497	0.474667	0.522333	0.460333	0.498667	0.497667	0.477333	0.589	0.492333	0.425	0.482	0.530333	0.558	0.371
2610020H08Rik	chr7	+	119843847	119844064	119832670	119832775	119848731	119848938	NA	NA	NA	NA	NA	NA	NA	NA	NA	NA	NA	0.813333	NA	1	NA	1	1	0.901333	NA	NA	0.186667
2610020H08Rik	chr7	+	119844258	119844446	119834263	119834401	119848731	119848943	NA	NA	NA	NA	NA	NA	NA	NA	NA	NA	NA	NA	NA	NA	0.134	0.0303333	NA	NA	NA	NA	0.103667
2610020H08Rik	chr7	+	119844258	119844446	119843847	119844064	119845382	119845501	0.769667	0.533333	0.673	0.761	0.794667	0.748	0.622	0.506667	0.764667	0.577333	0.649	0.594	0.842667	0.495333	0.665333	0.512667	0.653	0.56	0.693333	0.747667	0.347333
2610020H08Rik	chr7	+	119844258	119844446	119843847	119844064	119848731	119848943	0.482667	0.361667	0.361667	0.365333	0.636667	0.355333	0.631333	0.461	0.657333	0.549667	0.705667	0.493333	0.543	0.418333	0.604333	0.364667	0.728667	NA	0.595333	0.606333	0.373333
2610020H08Rik	chr7	+	119845382	119845501	119834263	119834401	119848731	119848939	0.654667	0.541667	0.578	0.378667	NA	0.411667	0.644	0.567667	0.768	0.561	0.625333	0.517	0.695	0.523	0.721333	0.605667	0.794667	0.538	0.603667	0.695	0.416
2610020H08Rik	chr7	+	119845382	119845501	119843864	119844064	119848731	119848939	0.612	0.557	0.541	0.479667	0.676667	0.400667	0.759	0.748667	0.759333	0.775333	0.825	0.704667	0.636667	0.671333	0.653667	0.650667	0.848	0.570667	0.757333	0.782	0.447333
2610021A01Rik	chr7	+	41601747	41601815	41599284	41599400	41602877	41602997	NA	NA	0.797667	NA	0.474333	0.762	0.773333	NA	0.269667	NA	0.483333	0.467333	NA	NA	NA	NA	NA	NA	0.693667	0.854667	0.585
2610021A01Rik	chr7	+	41601747	41601815	41599284	41599400	41603435	41603465	0	NA	0.087	0	0.0506667	0.355667	0.134667	0	0.013	0.0323333	0.092	0.048	0.035	0.025	0	0	0.112	0.0293333	0.218	0.0463333	0.355667
2610021A01Rik	chr7	+	41602877	41602997	41599284	41599400	41603435	41603465	0.235333	0.381667	0.324	0.251	0.286333	0.446	0.234333	0.175667	0.312333	0.372	0.166	0.149667	0.222667	0.0846667	0.228	0.0423333	0.339333	0.188	0.230333	0.233	0.403667
2610021A01Rik	chr7	+	41602877	41602997	41601747	41601815	41603435	41603465	1	NA	0.858333	NA	0.918	1	0.899	1	0.918	1	0.835	1	1	NA	1	NA	0.965667	0.835	0.630333	1	0.369667
2610021A01Rik	chr7	+	41603435	41603534	41599323	41599400	41611675	41611925	0.283	0.626667	0.388333	0.408667	0.392	0.237667	0.313667	0.322667	0.294	0.269333	0.404	0.32	0.409667	0.485333	0.397333	0.342667	0.399	0.36	0.282667	0.335667	0.389
2610027K06Rik	chr11	-	85801788	85801943	85795874	85796284	85832167	85832209	1	0.958	1	0.917667	1	0.794667	1	0.888667	1	0.928	0.975333	0.909667	1	0.922	1	0.933667	1	0.951667	0.983	0.945667	0.205333
2610027K06Rik	chr11	-	85805390	85805562	85795788	85796284	85832167	85832223	NA	0.866333	NA	0.733333	NA	0.626	NA	0.635667	NA	NA	NA	NA	NA	NA	NA	NA	NA	NA	NA	NA	0.240333
2610027K06Rik	chr11	-	85805390	85805562	85796153	85796284	85832167	85832223	1	0.866333	NA	0.733333	NA	NA	NA	0.635667	NA	0.766667	NA	0.725667	NA	0.709	NA	NA	NA	NA	NA	NA	0.364333
2610027K06Rik	chr11	-	85805390	85805562	85801788	85801943	85832167	85832223	0.915667	0.696667	NA	0.774333	NA	0.809333	NA	0.781	NA	0.750333	NA	0.736333	NA	0.791667	NA	0.758333	NA	0.772667	1	1	0.303333
2610028E06Rik	chr4	-	125893842	125893970	125893181	125893276	125898155	125898278	NA	NA	NA	NA	NA	NA	NA	NA	NA	NA	NA	NA	NA	NA	NA	1	NA	0.609333	NA	NA	0.390667
2610028E06Rik	chr4	-	125918487	125918806	125893842	125893970	125921872	125921968	NA	NA	NA	NA	NA	NA	NA	NA	NA	NA	NA	NA	NA	NA	NA	0.48	NA	0.666667	NA	NA	0.186667
2610028E06Rik	chr4	-	125921872	125921968	125918487	125918806	125922076	125922310	1	NA	NA	NA	NA	NA	NA	NA	NA	0.554667	NA	0.424667	NA	NA	NA	0.57	NA	0.666667	0.666667	NA	0.575333
2610035D17Rik	chr11	-	113067341	113067386	113043894	113045160	113172952	113173077	0.95	0.862667	0.899333	0.952	0.981333	0.764333	0.940333	0.917	0.926667	0.950333	0.923667	0.921	0.910333	0.951	0.926	0.916667	0.956333	0.960333	0.909333	0.931333	0.217
2610203C20Rik	chr9	+	41393377	41393417	41393193	41393299	41402123	41402263	NA	0.355333	NA	0	NA	NA	0.273667	0.295	0.0776667	0.139333	0.172	NA	0.203667	0.259667	0	0.124333	0.0673333	0.620667	NA	NA	0.620667
2610203C20Rik	chr9	+	41488193	41488268	41474936	41475153	41528122	41528200	NA	NA	NA	NA	NA	NA	0.828	0.285667	NA	0.559667	0.158667	0.316333	0.771333	0.543333	0.773	0.724	0.541	0.662	NA	0.884	0.725333
2610203C20Rik	chr9	+	41580712	41581402	41579973	41580198	41590219	41592829	0.86	NA	0.839333	0.811333	1	NA	1	1	1	1	NA	NA	1	0.921	0.833	1	1	1	1	1	0.188667
2610203C22Rik	chr1	-	9620954	9621082	9619549	9619639	9631060	9631137	NA	NA	NA	NA	NA	NA	NA	NA	NA	NA	NA	NA	NA	1	NA	NA	NA	NA	NA	0.865667	0.134333
2610206C17Rik	chr7	+	84736994	84737139	84689639	84689814	84764874	84764900	0.729333	NA	NA	NA	NA	NA	NA	NA	NA	NA	NA	NA	NA	NA	NA	NA	NA	NA	1	NA	0.270667
2610301B20Rik	chr4	+	10879522	10879610	10874564	10874693	10893262	10893469	NA	NA	NA	NA	NA	NA	NA	NA	NA	0.822667	NA	NA	1	NA	NA	0.807667	NA	NA	NA	NA	0.192333
2610301B20Rik	chr4	+	10879522	10879610	10874567	10874772	10893262	10893469	0.961333	0.989333	0.983	0.963	0.981	0.957	0.992	0.838	0.936333	0.911667	0.969	0.853667	0.994333	0.888667	0.982667	0.887667	0.990667	0.912667	0.967333	0.979	0.156333
2610301B20Rik	chr4	+	10881800	10881868	10879522	10879610	10893262	10893358	0.967667	0.813667	0.974667	0.972	0.992	1	0.990333	1	0.991	0.943667	0.979667	1	0.99	0.972	0.962667	0.943333	0.959	0.987	0.96	0.951333	0.186333
2610301B20Rik	chr4	+	10881800	10881868	10879522	10879610	10893262	10893469	0.967667	0.813667	0.974667	NA	0.992	1	0.990333	NA	NA	NA	NA	1	0.99	NA	0.962667	0.943333	NA	0.987	0.96	NA	0.186333
2610301B20Rik	chr4	+	10882406	10882472	10879522	10879610	10891621	10891778	NA	NA	NA	NA	NA	NA	NA	1	NA	NA	NA	NA	NA	1	NA	NA	NA	0.855667	0.666667	1	0.333333
2610301B20Rik	chr4	+	10882406	10882472	10879522	10879610	10893262	10893358	0.982333	0.870333	0.987667	0.978333	0.994667	1	0.993	1	0.995	0.957667	0.984	1	0.991333	0.975667	0.974	0.959	0.955	0.990333	0.970667	0.964	0.129667
2610301B20Rik	chr4	+	10882406	10882472	10881800	10881868	10891621	10891778	0.977333	0.78	0.975667	0.939	1	1	0.971667	1	1	1	0.989333	1	0.97	0.883	0.969333	0.889	0.862667	0.942	1	0.857333	0.22
2610307P16Rik	chr13	-	28513669	28513738	28505705	28505913	28516746	28516781	NA	NA	NA	NA	NA	NA	NA	NA	0.521	NA	0.464	NA	0.452667	NA	0.464	NA	0.414667	NA	NA	NA	0.106333
2610307P16Rik	chr13	-	28608517	28608628	28561440	28561579	28668369	28668704	0.858667	0.766	0.883	0.903	0.845	0.605667	0.908667	0.869333	0.884	0.883	0.898667	0.865	0.85	0.827333	0.883	0.839667	0.853667	0.838	0.850333	0.859333	0.303
2610307P16Rik	chr13	-	28668369	28668704	28561483	28561579	28711116	28711208	1	NA	0.809333	NA	1	1	1	1	1	1	0.933667	0.913333	1	0.937667	0.971333	0.962333	1	0.944667	0.948333	0.977	0.190667
2610307P16Rik	chr13	-	28668369	28668704	28608517	28608628	28711116	28711208	0.929333	0.887667	0.931	0.924333	0.939	0.970667	0.9	0.973	0.915333	0.916	0.946667	0.941	0.881	0.927	0.936	0.94	0.928	0.983333	0.873	0.974333	0.110333
2610307P16Rik	chr13	-	28669781	28669994	28668369	28668704	28772618	28772666	0.663	0.832333	0.819667	0.798333	0.644	0.551	0.725667	0.642333	0.62	0.678667	0.670333	0.668	0.548667	0.58	0.585	0.595	0.671333	0.585667	0.738	0.697	0.283667
2610307P16Rik	chr13	-	28711116	28711208	28608517	28608628	28772618	28772666	0.845	NA	0.788333	1	0.863333	NA	1	0.773	0.943333	0.717333	1	1	0.787333	0.889333	0.884	0.852	0.954667	0.895333	0.907333	0.917	0.282667
2610307P16Rik	chr13	-	28711116	28711208	28668369	28668704	28772618	28772666	0.425333	NA	0.642333	0.576667	0.392	NA	0.433667	0.351667	0.379667	0.443	0.383667	0.363333	0.343	0.357667	0.407667	0.346667	0.490667	0.348667	0.459667	0.489667	0.299333
2610316D01Rik	chr3	-	45287331	45287452	45281994	45282164	45327065	45327162	0.306333	NA	0.364	0.139667	0.142	0.033	0.0693333	0.106667	0.0306667	0.139333	0.140667	0.183	0.126667	0.136667	0.160667	0.140333	0.174667	0.166	0.203667	0.143	0.333333
2610316D01Rik	chr3	-	45364629	45364751	45363699	45363787	45366304	45366348	0.772667	0.694	0.728	0.701	0.606667	0.719	0.914667	0.829	0.713667	0.746333	0.774667	0.736667	0.760667	0.879333	0.714333	0.868667	0.797333	0.84	0.851	0.827667	0.308
2610316D01Rik	chr3	-	45366304	45366348	45363699	45363787	45378141	45378260	0.870667	NA	NA	0.802333	0.666667	NA	0.674	1	1	0.889667	0.713667	0.894333	0.929	0.821	NA	0.785	1	0.884333	0.956333	0.771667	0.333333
2610316D01Rik	chr3	-	45377867	45378010	45366304	45366348	45378141	45378205	0.0863333	NA	0.063	0.0953333	0.307667	NA	0.028	0.0636667	0.063	0.076	0.118667	0.0466667	0.0496667	0.134667	0.09	0.122333	0.0483333	0.127333	0.0863333	0.107333	0.279667
2610318N02Rik	chr16	-	17123511	17123654	17121295	17121551	17124989	17125106	0.166667	0.086	0.115333	0.123333	0.101667	0.101667	0.143	0.117	0.121667	0.0993333	0.134667	0.109667	0.128333	0.0943333	0.155333	0.0923333	0.123	0.0893333	0.187	0.189	0.103
2610507B11Rik	chr11	+	78273402	78273559	78273150	78273299	78274787	78274887	NA	NA	NA	NA	NA	NA	NA	NA	NA	NA	NA	NA	0.823333	NA	NA	NA	NA	NA	NA	1	0.176667
2700049A03Rik	chr12	+	71179039	71179158	71177828	71178022	71184422	71184622	0.938333	0.986667	0.955	0.975667	0.964	0.963	0.968667	0.936333	0.885	0.964	0.954	0.945333	0.937667	0.928667	0.936	0.922667	0.929333	0.940333	0.944	0.951667	0.101667
2700049A03Rik	chr12	+	71184422	71184622	71179039	71179158	71187380	71187537	0.974667	0.948667	0.954667	0.952667	0.908333	0.994	0.988	0.989667	0.981333	0.983667	0.976	0.956	0.964	0.932667	0.946333	0.894333	0.967	0.936667	1	0.943	0.105667
2700049A03Rik	chr12	+	71216041	71216196	71194291	71194466	71242943	71243303	0.439667	0.431333	0.359667	0.342667	0.321333	0.266667	0.288667	0.178	0.222667	0.184667	0.289667	0.166	0.449	0.442333	0.387	0.279333	0.365333	0.41	0.338333	0.475333	0.309333
2700049A03Rik	chr12	+	71219190	71219299	71194291	71194466	71242943	71243303	0.365333	0.206667	0.314667	0.259	0.260333	0.279333	0.367333	0.210667	0.280667	0.217	0.334667	0.231333	0.393	0.332667	0.317333	0.327	0.362667	0.376	0.39	0.458667	0.252
2700062C07Rik	chr18	+	24471061	24471084	24470860	24470980	24472949	24473149	0.711	0.65	0.742333	0.782	0.730667	0.698667	0.698333	0.698667	0.673667	0.739333	0.650333	0.703333	0.611333	0.706667	0.712667	0.659	0.596	0.633667	0.708667	0.615	0.186
2700062C07Rik	chr18	+	24471061	24471084	24470860	24470980	24475524	24475724	0.918333	0.964333	1	0.964667	0.961333	0.915333	0.946333	0.955667	1	0.977667	0.927333	0.891333	0.979333	0.978333	0.928333	0.957	0.988	0.960667	0.957667	0.951	0.108667
2700081O15Rik	chr19	+	7421913	7422462	7420066	7420561	7422642	7425904	0.778	0.912667	0.831333	0.873667	0.848333	0.753	0.745	0.740667	0.704333	0.807667	0.784667	0.708	0.743667	0.791333	0.903333	0.751	0.867	0.769	0.676	0.788667	0.236667
2700097O09Rik	chr12	-	55053300	55053407	55045660	55045943	55062987	55063109	NA	NA	NA	NA	0.666667	NA	NA	NA	NA	NA	1	1	NA	NA	NA	1	1	NA	0.872667	NA	0.333333
2700097O09Rik	chr12	-	55057241	55057352	55045660	55045943	55062987	55063109	1	NA	NA	0.942333	0.893	NA	1	NA	NA	0.856667	1	1	NA	NA	0.782	NA	NA	NA	NA	NA	0.218
2700099C18Rik	chr17	+	94755210	94755305	94750099	94750232	94756433	94756523	0.815	0.815	0.840667	0.815	0.844333	0.808667	0.9	0.895667	0.897667	0.913	0.925	0.911667	0.833667	0.817	0.799333	0.811333	0.838	0.830667	0.924667	0.853	0.125667
2700099C18Rik	chr17	+	94761497	94761604	94756433	94756523	94762461	94762620	0.737	0.603	0.772333	0.716333	0.744333	0.620333	0.696	0.7	0.708333	0.666667	0.644333	0.657333	0.87	0.860333	0.805333	0.793333	0.757	0.795667	0.713333	0.84	0.267
2810039B14Rik	chr15	+	75649851	75649920	75642483	75642511	75651225	75653643	NA	NA	NA	NA	NA	NA	NA	NA	NA	NA	NA	NA	NA	1	NA	NA	NA	0.651667	NA	NA	0.348333
2810403D21Rik	chrX	+	108836265	108836355	108833799	108833955	108901463	108901555	NA	0.666667	0.830667	1	0.871667	0.878667	1	0.920667	1	1	0.946667	1	0.961	0.878667	1	1	1	1	1	0.899667	0.333333
2810403D21Rik	chrX	+	108855879	108855929	108836265	108836355	108858267	108858372	NA	NA	NA	0.472333	NA	NA	0.560667	0	0.626333	NA	0.421	NA	0.531	0.421	0.260333	NA	0.454667	NA	0.666667	0.681333	0.681333
2810403D21Rik	chrX	+	108855879	108855929	108836265	108836355	108886344	108886896	0.064	NA	NA	NA	0	NA	0.0273333	0	0.0743333	NA	0.0223333	0.0223333	0.178333	0.0506667	0.0456667	NA	0	NA	0	0.0713333	0.178333
2810403D21Rik	chrX	+	108858267	108858372	108836265	108836355	108886344	108886896	0.065	NA	0.188667	0.216333	0.190667	NA	0.0396667	0.062	0.045	0.077	0.058	0.0326667	0.155333	0.0846667	0.043	0.024	0.0953333	0.0686667	0.044	0.0593333	0.192333
2810403D21Rik	chrX	+	108858267	108858372	108855879	108855929	108886344	108886896	NA	NA	NA	NA	NA	NA	0.895	NA	NA	NA	NA	NA	0.666667	NA	NA	NA	1	NA	NA	1	0.333333
2810403D21Rik	chrX	+	108871471	108871598	108836265	108836355	108874267	108874770	0.849	1	0.982667	0.982667	1	0.857667	0.792667	0.752667	0.881	0.825333	0.876	0.719667	0.759667	0.767	0.917667	0.940667	0.804	1	0.772333	0.926333	0.280333
2810403D21Rik	chrX	+	108871471	108871598	108836265	108836355	108886344	108886690	0.505333	0.888333	0.678	0.73	0.524333	0.610333	0.461	0.278333	0.485	0.407667	0.446333	0.443	0.494	0.474667	0.477	0.525667	0.500333	0.461333	0.384	0.394333	0.61
2810403D21Rik	chrX	+	108871471	108871598	108836265	108836355	108901463	108901555	0.704667	0.688667	0.632333	0.537333	0.442333	0.285	0.660333	0.355333	0.646	0.573	0.633333	0.410667	0.519	0.691333	0.646333	0.514333	0.630333	0.509333	0.597	0.646	0.419667
2810403D21Rik	chrX	+	108901463	108901555	108836265	108836355	108972120	108972170	1	1	NA	1	NA	NA	0.940667	0.965333	1	0.857667	1	1	1	1	NA	1	NA	NA	1	0.907333	0.142333
2810403D21Rik	chrX	+	108901463	108901555	108836265	108836355	108974264	108974398	0.741333	NA	1	1	1	NA	1	1	0.950667	0.600333	1	1	1	NA	1	1	0.821333	1	1	NA	0.399667
2810403D21Rik	chrX	+	108972120	108972170	108836265	108836355	108974264	108974398	0.666667	NA	NA	1	NA	NA	1	1	NA	0.799667	NA	NA	NA	NA	NA	1	NA	NA	NA	NA	0.333333
2810403D21Rik	chrX	+	108972120	108972170	108901463	108901555	108974264	108974398	0.840667	0.944333	NA	0.932333	NA	1	0.89	0.813	0.904667	0.839	0.538667	0.698667	0.573667	0.913667	0.794	0.944333	0.862667	0.548667	0.677	0.697333	0.461333
2810408A11Rik	chr11	-	69897610	69898150	69897465	69897492	69898251	69898410	0.955	1	1	1	0.949667	NA	0.859	1	0.964667	0.891667	0.883	0.915667	1	0.966667	0.941667	1	0.905667	1	0.946	0.972667	0.141
2810408A11Rik	chr11	-	69897610	69898150	69897465	69897492	69898846	69899092	1	NA	NA	NA	NA	NA	0.816	0.93	0.815333	0.941667	1	1	1	1	NA	NA	NA	NA	1	NA	0.184667
2810408A11Rik	chr11	-	69897610	69898150	69897465	69897492	69900302	69900957	NA	NA	NA	NA	NA	NA	NA	NA	NA	NA	NA	NA	0.74	NA	NA	NA	NA	NA	NA	1	0.26
2810408A11Rik	chr11	-	69897618	69897754	69897362	69897492	69898102	69898150	0.452333	0.512667	0.421333	0.598667	0.318	0.234333	0.345667	0.358667	0.363	0.334	0.297667	0.323667	0.402	0.483	0.308667	0.413333	0.454333	0.419333	0.422	0.413667	0.364333
2810408A11Rik	chr11	-	69897618	69897754	69897362	69897492	69898251	69898410	NA	NA	NA	NA	0.829667	NA	0.794667	NA	0.931	NA	0.777	0.891667	NA	NA	NA	NA	0.774667	NA	NA	NA	0.156333
2810408A11Rik	chr11	-	69897618	69898410	69897362	69897492	69899198	69899287	NA	NA	NA	NA	NA	NA	1	NA	NA	NA	1	NA	0.763333	1	1	NA	0.850333	1	NA	1	0.236667
2810408A11Rik	chr11	-	69897618	69898410	69897362	69897492	69900302	69900975	NA	NA	NA	NA	NA	NA	0.751333	NA	NA	NA	NA	NA	0.706667	1	1	NA	1	NA	NA	1	0.293333
2810408A11Rik	chr11	-	69898102	69898150	69897351	69897492	69898846	69899092	1	NA	NA	NA	NA	NA	0.865333	0.955667	0.789333	0.972	1	1	1	1	NA	NA	NA	NA	1	NA	0.210667
2810408A11Rik	chr11	-	69898102	69898410	69897465	69897492	69899198	69899287	NA	NA	NA	NA	NA	NA	1	NA	NA	NA	1	NA	0.878	1	1	NA	0.878	1	NA	1	0.122
2810408A11Rik	chr11	-	69898102	69898410	69897465	69897492	69900302	69900987	NA	NA	NA	NA	NA	NA	0.855	NA	NA	NA	NA	NA	0.863667	1	1	NA	1	NA	NA	1	0.145
2810408A11Rik	chr11	-	69898251	69898410	69897351	69897492	69899198	69899287	NA	NA	NA	NA	NA	NA	1	NA	NA	NA	1	NA	NA	1	1	NA	0.856333	1	NA	1	0.143667
2810429I04Rik	chr13	+	3479521	3479574	3478233	3478390	3479908	3480001	0.189667	0.221	0.229667	0.221	0.157	0.226	0.199667	0.290667	0.169	0.233667	0.167667	0.233	0.178667	0.224	0.118667	0.156333	0.15	0.181	0.093	0.083	0.207667
2810429I04Rik	chr13	+	3479521	3479574	3478233	3478390	3485048	3485187	NA	NA	0.716333	NA	NA	NA	0.804333	NA	1	NA	NA	NA	NA	NA	NA	NA	NA	NA	NA	NA	0.283667
2810429I04Rik	chr13	+	3479521	3479574	3478276	3478352	3479908	3480001	0.174667	0.123667	0.139	0.146333	0.156667	0.172333	0.140667	0.129	0.0963333	0.165667	0.126667	0.106667	0.100333	0.123667	0.113	0.115333	0.139	0.104667	0.122333	0.0726667	0.102
2810429I04Rik	chr13	+	3498274	3498358	3498044	3498156	3500915	3501393	0.956667	0.751667	0.981667	0.95	1	1	1	1	1	1	NA	NA	NA	NA	NA	NA	NA	NA	1	NA	0.248333
2810474O19Rik	chr6	+	149317634	149317708	149310321	149310377	149324731	149324800	0.731	0.512333	0.751333	0.726	0.741	0.611667	0.743333	0.675667	0.826333	0.746	0.680667	0.762333	0.601	0.576333	0.686333	0.641333	0.716	0.638333	0.781	0.763333	0.314
2810474O19Rik	chr6	+	149317634	149317708	149310321	149310377	149325404	149328977	0.429	0.634667	0.491	0.502333	0.426	0.381333	0.433667	0.518333	0.424	0.547667	0.396	0.414	0.486333	0.405	0.428667	0.371667	0.391	0.416333	0.478333	0.318	0.316667
2810474O19Rik	chr6	+	149324731	149324800	149310321	149310377	149325404	149325489	0.394667	0.587333	0.425667	0.415667	0.364333	0.507	0.401333	0.503333	0.421667	0.58	0.366333	0.356667	0.537	0.522	0.485	0.433333	0.387333	0.486	0.456	0.276333	0.311
2810474O19Rik	chr6	+	149324731	149324800	149317634	149317708	149325404	149325489	0.493	0.357667	0.454333	0.412	0.459	0.610333	0.553667	0.539667	0.571333	0.598333	0.479	0.526333	0.539	0.601333	0.577	0.587333	0.565	0.571333	0.554	0.53	0.252667
2900026A02Rik	chr5	-	113175204	113175339	113101458	113101577	113182053	113184717	0.991	1	0.993	0.863667	1	1	0.972333	1	0.992	1	0.989333	1	1	1	0.984	1	1	NA	0.993667	0.992	0.136333
2900026A02Rik	chr5	-	113193760	113193907	113190603	113192199	113221210	113221236	1	NA	NA	NA	NA	NA	1	1	1	NA	NA	NA	1	NA	0.845	NA	1	NA	0.945	1	0.155
2900076A07Rik	chr7	+	81528786	81528940	81523549	81523676	81529346	81529438	NA	NA	NA	NA	0.875667	0.715	NA	NA	0.851	0.876333	NA	NA	NA	NA	0.850333	NA	0.765333	NA	NA	NA	0.161333
2900076A07Rik	chr7	+	81528786	81528940	81523570	81523676	81529346	81529438	0.854667	0.701	0.823333	0.813	0.875667	0.715	0.811333	0.731333	0.851	0.876333	0.838333	0.742667	0.814	0.756667	0.850333	0.789	0.765333	0.724333	0.832667	0.867667	0.175333
2900076A07Rik	chr7	+	81529156	81529258	81528791	81528940	81529346	81529527	0.125	0.263	0.158667	0.0416667	0.174	0.196667	0.0673333	0.0706667	0.0876667	0.0876667	0.086	0.0676667	0.233	0.155	0.224667	0.13	0.233333	0.108	0.105333	0.197333	0.221333
3010001F23Rik	chrX	+	152369841	152370022	152369027	152369116	152385644	152386200	0.897333	NA	0.970333	0.916	1	1	0.982667	0.945667	0.951333	0.986667	0.968333	0.950667	1	0.939333	1	1	0.931667	0.979667	1	0.930333	0.102667
3010001F23Rik	chrX	+	152385644	152385752	152369841	152370022	152402967	152403045	0.963	0.666667	1	1	1	1	0.902333	0.988	0.932667	1	0.968667	0.979333	0.842333	1	1	0.983	0.921	0.882667	0.983667	0.989667	0.333333
3010001F23Rik	chrX	+	152385644	152385752	152369841	152370022	152416290	152416698	0.955333	NA	0.942667	1	0.970333	1	0.896333	0.963	0.963	0.986	0.933	0.942667	0.967	0.898667	0.886333	0.870667	0.879333	0.917	0.949667	0.990333	0.129333
3010001F23Rik	chrX	+	152403312	152403477	152369841	152370022	152416290	152416698	0.974333	1	0.979333	1	0.970667	1	0.916333	0.972	0.967667	0.986	0.926333	0.943333	0.976667	0.900333	0.871	0.904	0.946333	0.947667	0.953	0.989333	0.129
3010026O09Rik	chr11	+	50196943	50197092	50182491	50182580	50199535	50200115	NA	NA	NA	NA	NA	NA	NA	NA	0.666667	NA	1	NA	NA	NA	NA	NA	NA	NA	NA	NA	0.333333
3110002H16Rik	chr18	+	12169232	12169309	12168751	12168902	12171548	12171633	0.919333	0.753667	0.924	0.883667	0.954	0.869667	0.898333	0.874667	0.955667	0.862667	0.911333	0.891333	0.969667	0.918667	0.927667	0.915333	0.946	0.88	0.937	0.939	0.216
3110009E18Rik	chr1	+	120171400	120171482	120166134	120166172	120188040	120188189	0.791667	0.806	0.726333	0.764667	0.851	0.822333	0.791	0.784	0.71	0.729	0.799667	0.822	0.772667	0.747667	0.795	0.765	0.681	0.754	0.782333	0.798	0.17
3110043O21Rik	chr4	-	35221880	35222088	35218592	35218916	35225928	35226123	0.172333	NA	0.343	NA	0.171667	NA	0.773	0.451333	0.416667	0.666667	0.666667	NA	NA	NA	NA	0.477	0.719333	NA	0.161333	0.728	0.611667
3110045C21Rik	chr1	+	169970449	169970802	169969408	169969575	169971781	169972396	0.608	0.491	0.576	0.700667	0.600333	0.732333	0.671333	0.605667	0.643	0.758333	0.571667	0.646	0.626333	0.679	0.752333	0.747	0.673	0.604333	0.605667	0.607333	0.267333
3110045C21Rik	chr1	+	169970469	169970802	169969451	169969575	169971781	169972370	0.306667	0.227	0.293667	0.378333	0.326	0.493333	0.426667	0.399	0.376	0.491333	0.325333	0.408	0.301333	0.407667	0.524333	0.532	0.438	0.339	0.352667	0.364	0.305
3110053B16Rik	chr12	-	20914758	20914841	20875639	20877095	20920841	20921262	0.623333	0.479333	0.666667	0.538667	0.788667	0.475	0.618	0.558667	0.648667	0.509333	0.61	0.438667	0.517	0.294333	0.546333	0.396333	0.566667	0.401	0.651	0.371667	0.494333
3110053B16Rik	chr12	-	20915747	20915791	20914758	20914841	20920841	20921262	0.356	0.471333	0.335	0.335333	0.337333	0.296333	0.602667	0.427	0.395333	0.334	0.455667	0.447	0.563667	0.464	0.517333	0.388667	0.567333	0.441667	0.431667	0.444333	0.306333
3110099E03Rik	chr2	-	115502480	115502611	115497720	115497882	115527702	115527744	NA	NA	NA	0	NA	NA	NA	NA	NA	0.0366667	0.333333	NA	NA	NA	0.109333	NA	0.0363333	NA	NA	NA	0.333333
3300002I08Rik	chr2	-	150344308	150344369	150310934	150311218	150344579	150344706	1	NA	0.952667	0.941667	1	0.967333	0.964667	0.927333	0.968	0.939667	1	0.933667	0.874	0.929	1	0.791333	1	0.960333	0.963333	0.905333	0.208667
3300002I08Rik	chr2	-	150344308	150344369	150342835	150343155	150344579	150344706	0.959	1	0.982	0.992667	0.954333	0.953667	0.898333	0.962667	0.925333	0.988667	0.915333	0.920667	0.905	0.906	0.929667	0.921667	0.909333	0.890667	0.958333	0.993333	0.109333
3300002I08Rik	chr2	-	150360110	150360192	150344579	150344706	150362587	150362742	0.04	0.0496667	0.109667	0.0733333	0.051	0.00866667	0.037	0.0333333	0.0543333	0.0576667	0.0683333	0.026	0.063	0.068	0.0636667	0.0406667	0.0193333	0.0573333	0.031	0.073	0.101
3830403N18Rik	chrX	+	56138744	56138779	56138410	56138474	56147075	56147193	NA	NA	NA	NA	NA	NA	NA	NA	NA	0.932	NA	1	NA	NA	NA	NA	NA	0.828333	NA	NA	0.171667
3830406C13Rik	chr14	+	12285384	12285468	12284208	12284257	12287269	12287393	0.939	0.952333	0.945	0.846333	0.879667	0.866667	0.938	0.940333	0.943333	0.956333	0.938333	0.929	0.915667	0.934667	0.909667	0.936333	0.934333	0.923667	0.940333	0.892333	0.11
3830406C13Rik	chr14	+	12299721	12299782	12297581	12297656	12301147	12303231	0.0843333	0.0363333	0.0753333	0.0673333	0.0773333	0.0226667	0.0876667	0.139333	0.084	0.121333	0.13	0.115	0.103333	0.0916667	0.09	0.0866667	0.086	0.0873333	0.0916667	0.0966667	0.116667
3930402G23Rik	chr8	-	10927284	10927521	10926916	10926995	10928019	10928108	0.836333	NA	NA	NA	0.780333	NA	0.503	0.512333	0.802667	0.616667	0.836333	0.666667	NA	NA	NA	0.666667	NA	NA	0.243333	0.514	0.593
4430402I18Rik	chr19	-	28954089	28954131	28948618	28948743	28959679	28959728	0	NA	0.666667	NA	0	NA	NA	NA	NA	NA	NA	NA	NA	0.2	NA	NA	NA	0	0.233333	0.229	0.666667
4430402I18Rik	chr19	-	28959679	28959728	28948618	28948743	28963535	28963673	0.806	NA	NA	NA	1	NA	1	NA	NA	NA	NA	NA	NA	0.894333	NA	NA	NA	1	1	1	0.194
4430402I18Rik	chr19	-	28959679	28959728	28954089	28954131	28963535	28963673	NA	NA	NA	NA	NA	NA	NA	NA	NA	NA	NA	NA	NA	NA	NA	NA	NA	NA	0.863333	1	0.136667
4732414G09Rik	chr11	-	73016447	73016513	73015855	73016049	73018656	73018804	NA	NA	NA	NA	NA	NA	NA	NA	0.666667	NA	0.666667	NA	NA	0.654333	NA	0.601333	1	1	0.749	0.707	0.398667
4732463B04Rik	chr12	-	84043158	84043805	84039468	84041441	84053495	84053807	NA	NA	NA	1	NA	NA	NA	0.815667	NA	0.775667	NA	1	NA	1	NA	1	NA	NA	1	NA	0.224333
4732471J01Rik	chr7	+	25531066	25531157	25417400	25417509	25531290	25531462	NA	NA	1	NA	NA	NA	NA	1	1	0.666667	NA	1	NA	NA	1	NA	NA	NA	NA	1	0.333333
4833418N02Rik	chr17	-	87276445	87276474	87275246	87275370	87277411	87277582	NA	NA	1	NA	NA	NA	0.96	NA	0.731667	NA	0.928333	0.763	1	0.873	0.903	NA	1	NA	1	NA	0.268333
4833418N02Rik	chr17	-	87277411	87277582	87276445	87276474	87280558	87281693	0.796	NA	1	NA	1	NA	0.586333	NA	0.586	0.819333	0.786	0.905667	0.747	0.819333	0.863	NA	0.661667	1	0.516667	1	0.483333
4833418N02Rik	chr17	-	87277411	87277582	87276445	87276474	87282173	87282500	NA	NA	1	NA	0.666667	NA	1	NA	0.876	1	0.876	0.765667	1	NA	0.819333	0.666667	0.566333	NA	1	0.666667	0.433667
4833418N02Rik	chr17	-	87280558	87280762	87276445	87276474	87282173	87282814	0.810667	NA	1	NA	NA	NA	1	NA	0.810667	NA	0.917333	0.758333	1	0.810667	0.877	NA	0.558	NA	1	NA	0.442
4833418N02Rik	chr17	-	87280558	87280762	87277411	87277582	87282173	87282814	1	NA	1	NA	NA	NA	0.853	1	1	NA	1	1	1	1	1	NA	0.892	1	1	NA	0.147
4833420G17Rik	chr13	+	119469514	119470161	119462758	119463119	119484452	119484493	NA	NA	NA	NA	NA	NA	NA	0.666667	NA	1	NA	NA	NA	NA	NA	NA	NA	NA	NA	NA	0.333333
4833422M21Rik	chr15	-	96253863	96254002	96231869	96232874	96254463	96254616	NA	NA	1	NA	NA	NA	1	NA	0.828667	NA	1	NA	NA	NA	1	NA	NA	NA	NA	NA	0.171333
4833422M21Rik	chr15	-	96253863	96254002	96248957	96251075	96254463	96254616	NA	NA	NA	NA	NA	NA	1	NA	NA	NA	NA	NA	0.773667	1	1	NA	1	NA	NA	1	0.226333
4833423E24Rik	chr2	-	85490345	85490443	85488747	85488844	85490668	85490745	1	NA	1	NA	0.959667	NA	0.897333	NA	0.918333	NA	1	NA	1	NA	0.957	NA	0.939333	NA	1	0.922	0.102667
4833439L19Rik	chr13	-	54559197	54559324	54553197	54553304	54564514	54564621	NA	1	NA	0.570333	NA	1	NA	NA	NA	1	NA	0.725667	NA	NA	NA	NA	NA	1	NA	NA	0.429667
4833439L19Rik	chr13	-	54559197	54559324	54553197	54553304	54565181	54565291	0.777333	NA	1	0.866	NA	NA	NA	0.832667	0.866	1	NA	0.925333	NA	1	NA	1	1	0.897	NA	NA	0.222667
4833439L19Rik	chr13	-	54559197	54559324	54556193	54556651	54565181	54565291	0.663333	0.690667	0.766667	0.729	0.697	0.593	0.744	0.716333	0.744333	0.694333	0.723667	0.688667	0.646333	0.503333	0.559667	0.471333	0.607667	0.506333	0.744667	0.579333	0.295333
4833439L19Rik	chr13	-	54561692	54561871	54553197	54553304	54565181	54565291	NA	NA	NA	NA	NA	NA	0.817	0.697667	NA	NA	NA	NA	NA	1	NA	NA	NA	0.723667	NA	NA	0.302333
4833439L19Rik	chr13	-	54561692	54561871	54556586	54556651	54564514	54564621	0.603667	0.666333	0.720333	0.657667	0.616333	0.587	0.659667	0.774	0.610333	0.661	0.814667	0.737	0.605333	0.467	0.599333	0.772333	0.635667	0.753	0.744	0.546	0.347667
4833439L19Rik	chr13	-	54564184	54564272	54556526	54556651	54564509	54564621	NA	NA	1	1	1	NA	1	1	1	0.879333	0.955333	1	1	0.822667	NA	1	1	1	1	1	0.177333
4833439L19Rik	chr13	-	54564184	54564272	54559197	54559324	54564509	54564621	1	NA	NA	NA	NA	NA	1	1	NA	NA	NA	NA	1	1	NA	NA	NA	NA	0.855333	0.900333	0.144667
4833439L19Rik	chr13	-	54564184	54564272	54559197	54559324	54564514	54564621	0.958667	0.857667	0.995	0.942667	0.974	0.929	0.969667	0.963667	0.976	0.967667	0.961333	0.970667	0.969	0.96	0.972667	0.981333	0.963	0.953333	0.948	0.965	0.137333
4833439L19Rik	chr13	-	54564184	54564272	54559197	54559324	54565181	54565356	0.173	NA	0.267333	0.0546667	0.333333	NA	0.0226667	0.235	0.408667	0.371	0.606	0.161667	0.282667	0.16	0.0756667	0.158333	0.310667	0.0813333	0.453667	NA	0.583333
4833439L19Rik	chr13	-	54564509	54564621	54556586	54556651	54565181	54565325	0.646667	NA	NA	0.646667	NA	NA	0.761667	NA	NA	0.738	0.742333	0.702	NA	NA	NA	NA	NA	NA	NA	NA	0.115
4833439L19Rik	chr13	-	54564509	54564621	54556586	54556651	54565181	54565330	0.646667	0.735333	0.75	NA	0.696333	NA	NA	0.728667	0.791667	0.738	0.742333	NA	0.710333	0.553	NA	0.564	0.675	0.568333	0.771333	0.698333	0.238667
4833439L19Rik	chr13	-	54564514	54564621	54556526	54556651	54565181	54565435	0.651	0.738667	0.753	0.652333	0.699333	0.665	0.766333	0.732	0.795667	0.744	0.745	0.708667	0.709	0.556333	0.668	0.562	0.678333	0.565667	0.775	0.699333	0.239333
4921504A21Rik	chr5	-	19207084	19207172	19202367	19203925	19210227	19210322	0.103	0.234667	0.336	0.0226667	0.220333	NA	0.459333	0.130333	NA	NA	0.204333	0.0426667	NA	0.196	0.666667	0.0383333	0.198667	0.313667	0.110667	0.0976667	0.644
4921507P07Rik	chr6	-	50577790	50577965	50573301	50574516	50583929	50584018	1	0.666667	1	1	0.951333	1	0.962667	1	NA	NA	1	NA	0.884	0.764667	0.884	1	1	NA	1	1	0.333333
4930402H24Rik	chr2	-	130741816	130741963	130740400	130740489	130748684	130748788	0.966333	0.819	1	1	0.977	0.983	1	0.986	1	0.997667	1	0.997667	1	0.981667	1	0.986667	0.975667	0.991	0.984667	1	0.181
4930402H24Rik	chr2	-	130820468	130820588	130814178	130814303	130839963	130840134	0.971667	0.984	0.905333	0.934667	0.905333	0.973333	0.986	0.970667	0.972333	0.917667	0.988667	0.928333	0.934333	0.906667	0.980333	0.874667	0.878333	0.899	0.974333	0.944667	0.114
4930402H24Rik	chr2	-	130822420	130822500	130814178	130814303	130839399	130839687	NA	NA	NA	NA	NA	NA	NA	NA	NA	NA	NA	NA	NA	NA	NA	0.793	NA	1	NA	1	0.207
4930402H24Rik	chr2	-	130822420	130822500	130814178	130814303	130839963	130840111	0.88	0.961333	0.737667	0.838667	0.866	0.958	0.976	0.953333	0.951667	0.848333	0.972	0.897667	0.903	0.874	0.976	0.812667	0.825333	0.848667	0.954667	0.935	0.238333
4930405A21Rik	chr2	-	156716094	156716245	156714539	156715049	156716884	156717013	0.617333	NA	0.620667	0.212333	NA	NA	0.535333	0.380333	0.122333	0.213667	0.564667	0.206333	0.338667	0.609667	0.408333	0.442667	0.554	0.436333	0.411	0.327333	0.498333
4930412C18Rik	chr4	+	9782625	9782739	9770584	9770821	9819923	9820286	1	NA	1	NA	0.781	NA	NA	NA	NA	NA	NA	NA	NA	NA	NA	NA	NA	1	0.781	0.666667	0.333333
4930412C18Rik	chr4	+	9784904	9785161	9782625	9782739	9819923	9821951	0.0203333	NA	0.109667	NA	0.0326667	NA	NA	NA	NA	0	NA	NA	NA	NA	NA	NA	NA	0	0	NA	0.109667
4930412O13Rik	chr2	+	9882542	9882864	9881765	9881941	9883006	9883141	1	NA	1	0.739667	NA	1	0.666667	0.937333	1	1	NA	0.932333	NA	0.887333	NA	1	NA	1	1	1	0.333333
4930412O13Rik	chr2	+	9883006	9883141	9881765	9881941	9883795	9883921	NA	NA	NA	NA	NA	NA	NA	1	NA	NA	NA	0.775	NA	NA	NA	NA	NA	NA	NA	NA	0.225
4930415F15Rik	chr11	+	11487670	11487747	11462093	11462316	11488507	11488537	NA	NA	NA	NA	NA	NA	0.794	1	1	NA	NA	NA	1	NA	NA	NA	NA	NA	NA	NA	0.206
4930415F15Rik	chr11	+	11487670	11487747	11462093	11462316	11488507	11488646	1	NA	NA	NA	NA	NA	0.794	NA	NA	NA	NA	NA	NA	NA	NA	NA	NA	NA	NA	NA	0.206
4930415F15Rik	chr11	+	11487670	11487747	11477093	11477194	11488507	11488537	1	NA	NA	0.836	0.588	NA	0.812	0.929333	0.794	NA	NA	0.869	1	NA	0.566333	0.596333	NA	NA	NA	NA	0.433667
4930415F15Rik	chr11	+	11487670	11487747	11477093	11477194	11488507	11488646	1	NA	NA	NA	NA	NA	0.812	NA	NA	NA	NA	NA	NA	NA	NA	NA	NA	NA	NA	NA	0.188
4930426D05Rik	chr18	+	21652706	21652862	21651564	21651738	21653808	21654013	1	NA	NA	NA	NA	NA	NA	NA	NA	NA	NA	NA	NA	NA	NA	NA	NA	NA	0.863	1	0.137
4930426D05Rik	chr18	+	21653460	21653513	21652562	21652870	21653808	21654013	1	NA	NA	NA	NA	NA	NA	NA	NA	NA	NA	NA	NA	NA	NA	NA	NA	NA	0.849	0.954333	0.151
4930427A07Rik	chr12	+	113157160	113157363	113156674	113156753	113157577	113157727	0.88	0.748	0.873333	0.756333	0.913	0.752667	0.874	0.772333	0.880667	0.727	0.854333	0.721667	0.893333	0.842333	0.872	0.839333	0.905333	0.764333	0.891667	0.897333	0.191333
4930427A07Rik	chr12	+	113157470	113157727	113157160	113157363	113161302	113161389	1	NA	1	NA	NA	NA	0.831667	1	0.887667	1	0.844667	NA	1	NA	1	NA	1	NA	1	NA	0.168333
4930427A07Rik	chr12	+	113157577	113157727	113156674	113156753	113161302	113161389	NA	NA	1	NA	1	NA	1	0.881667	0.920333	1	0.959667	1	0.954667	0.898	1	0.951667	0.871333	0.951667	1	0.956	0.128667
4930432K21Rik	chr8	+	84148837	84148885	84148158	84148398	84159444	84159607	0.654667	0.965667	0.523	0.881333	NA	0.570333	0.825	0.557	0.428	NA	0.613333	0.518333	0.476333	0.797333	0.721	0.719333	0.855333	0.773667	0.746333	0.700667	0.537667
4930432K21Rik	chr8	+	84148837	84148885	84148251	84148398	84159444	84159607	0.654667	0.965667	0.523	0.881333	0.834333	0.570333	NA	0.557	0.428	0.74	0.613333	0.518333	NA	NA	NA	0.719333	0.855333	0.773667	0.746333	NA	0.537667
4930432K21Rik	chr8	+	84162299	84162404	84161212	84161291	84166580	84167690	0.463667	NA	0.314333	0.627333	0.385333	0.211333	0.493	0.612667	0.505667	0.479333	0.511	0.583	0.436333	0.577333	0.617667	0.559	0.312	0.485667	0.553333	0.666667	0.455333
4930432K21Rik	chr8	+	84166580	84167690	84161212	84161291	84170354	84170452	1	NA	0.810667	1	1	NA	0.877333	1	0.872667	1	1	NA	1	NA	1	NA	NA	NA	1	NA	0.189333
4930432K21Rik	chr8	+	84170354	84170452	84166580	84167690	84171817	84171910	0.949667	1	1	0.939333	0.949667	1	0.962333	1	1	1	0.939333	0.961	0.923667	0.986333	0.861333	1	1	1	1	0.905333	0.138667
4930444P10Rik	chr1	-	16080829	16080993	16078567	16078700	16081667	16082510	0.912667	NA	NA	NA	1	NA	NA	0.723	NA	1	0.821333	1	NA	1	NA	0.821333	NA	1	0.901333	1	0.277
4930444P10Rik	chr1	-	16080829	16080993	16078567	16078700	16092973	16093325	0.821333	NA	NA	NA	1	NA	NA	NA	NA	0.586667	0.821333	NA	NA	0.878	NA	0.767667	NA	0.811667	0.704667	1	0.413333
4930444P10Rik	chr1	-	16081667	16082510	16080829	16080993	16092973	16093325	NA	NA	NA	NA	NA	NA	NA	NA	NA	NA	NA	NA	NA	1	NA	0.371333	NA	0.148667	0.280333	0.359333	0.851333
4930447C04Rik	chr12	-	72894983	72895045	72892803	72892979	72898486	72898533	0.0433333	0	0.185	0.230333	0.0283333	0.0243333	0.071	0.184667	0.107333	0.156667	0.111	0.0256667	0.0876667	0.0963333	0.0466667	0.083	0.091	0.047	0.181333	0.0646667	0.230333
4930447C04Rik	chr12	-	72894983	72895045	72892869	72892979	72898486	72898533	0.0433333	0	NA	NA	NA	0.0243333	NA	0.184667	NA	NA	NA	NA	NA	NA	NA	NA	NA	NA	0.181333	0.0646667	0.184667
4930447C04Rik	chr12	-	72898486	72898533	72892815	72892979	72906184	72906473	NA	NA	NA	NA	NA	NA	NA	1	NA	0.864	NA	NA	1	0.965667	NA	1	NA	1	NA	1	0.136
4930447C04Rik	chr12	-	72898486	72898533	72892815	72892979	72906190	72906279	1	NA	1	NA	0.977333	1	NA	NA	NA	0.895333	0.895333	NA	NA	NA	NA	1	0.937667	1	NA	NA	0.104667
4930447C04Rik	chr12	-	72898486	72898533	72892923	72892979	72906190	72906279	NA	NA	1	0.666667	NA	NA	NA	NA	NA	NA	NA	NA	NA	NA	NA	NA	NA	NA	NA	NA	0.333333
4930447C04Rik	chr12	-	72902412	72902489	72892923	72892979	72903215	72903334	NA	NA	NA	NA	NA	NA	NA	NA	NA	NA	NA	NA	NA	1	NA	0.817333	NA	0.745333	NA	NA	0.254667
4930447C04Rik	chr12	-	72902412	72902489	72898709	72898795	72903215	72903334	0.431333	0.650667	0.538333	0.748	0.734	0.615333	0.440333	0.652	0.561	0.625333	0.540333	0.492667	0.698667	0.421	0.542333	0.304667	0.565667	0.448667	0.485	0.264667	0.483333
4930447C04Rik	chr12	-	72902412	72902489	72898709	72898795	72906184	72906473	NA	NA	0.827	NA	NA	NA	0.824	NA	1	0.787333	NA	NA	1	0.949333	0.808	0.929333	NA	1	NA	0.851	0.212667
4930447C04Rik	chr12	-	72902412	72902489	72898709	72898795	72906190	72906271	1	NA	NA	NA	NA	NA	0.937333	1	NA	NA	0.581333	NA	0.937333	0.734667	0.764	NA	NA	0.756333	0.904	0.588	0.418667
4930447C04Rik	chr12	-	72902412	72902489	72898709	72898795	72906190	72906279	NA	NA	NA	NA	NA	NA	NA	NA	NA	NA	NA	NA	NA	NA	NA	NA	NA	NA	0.904	0.588	0.316
4930447C04Rik	chr12	-	72903215	72903334	72892869	72892979	72906184	72906473	NA	NA	NA	NA	NA	NA	NA	NA	NA	NA	NA	NA	NA	0.890667	NA	NA	NA	1	NA	NA	0.109333
4930447C04Rik	chr12	-	72903215	72903334	72892923	72892979	72906184	72906473	NA	NA	NA	NA	NA	NA	1	NA	0.854	0.779667	1	1	NA	0.890667	1	1	NA	NA	NA	NA	0.220333
4930447C04Rik	chr12	-	72903215	72903334	72892923	72892979	72906190	72906271	NA	NA	NA	0.802	NA	NA	0.868667	0.811667	1	0.835333	NA	1	NA	NA	NA	1	0.890667	1	NA	NA	0.198
4930447C04Rik	chr12	-	72903215	72903334	72898486	72898533	72906190	72906271	NA	NA	0.666667	1	NA	NA	NA	NA	NA	NA	NA	NA	NA	NA	NA	NA	NA	NA	NA	NA	0.333333
4930447C04Rik	chr12	-	72903215	72903334	72898709	72898795	72906184	72906473	0.949667	NA	0.835333	0.779667	0.830333	NA	0.850333	1	1	0.859	1	1	1	0.963667	0.831333	0.965667	1	1	1	0.949667	0.220333
4930447C04Rik	chr12	-	72903215	72903334	72898709	72898795	72906190	72906271	NA	NA	1	NA	0.835333	NA	0.953333	1	0.847	0.752333	0.656667	0.899	NA	NA	0.859	0.793	0.833667	0.869333	0.956333	0.798	0.343333
4930447C04Rik	chr12	-	72903215	72903334	72898709	72898795	72906190	72906279	NA	NA	NA	NA	NA	NA	NA	1	NA	NA	NA	NA	0.918333	0.837667	NA	0.793	NA	0.869333	NA	0.798	0.207
4930447C04Rik	chr12	-	72903215	72903334	72898709	72898795	72906190	72906282	1	NA	NA	1	0.835333	NA	0.953333	1	NA	0.752333	0.656667	NA	0.918333	NA	0.859	NA	0.833667	NA	0.956333	0.798	0.343333
4930447C04Rik	chr12	-	72903215	72903334	72902412	72902489	72906184	72906473	NA	NA	NA	NA	NA	NA	1	NA	0.698	1	1	1	0.949667	1	1	0.906333	1	0.868667	NA	1	0.302
4930447C04Rik	chr12	-	72903215	72903334	72902412	72902489	72906190	72906271	NA	NA	NA	NA	NA	NA	NA	NA	NA	NA	NA	NA	NA	NA	NA	NA	0.927333	1	0.868667	1	0.131333
4930447C04Rik	chr12	-	72903215	72903334	72902412	72902489	72906190	72906279	NA	NA	NA	NA	NA	NA	NA	NA	NA	NA	NA	NA	0.877	1	NA	NA	NA	NA	NA	NA	0.123
4930447C04Rik	chr12	-	72903215	72903334	72902412	72902489	72906190	72906282	1	NA	NA	NA	NA	NA	1	1	NA	NA	1	NA	0.877	NA	1	NA	0.927333	NA	0.868667	1	0.131333
4930447C04Rik	chr12	-	72909903	72910091	72892803	72892979	72913184	72913274	NA	NA	NA	NA	NA	NA	NA	NA	NA	0.555333	0.927333	0.666667	NA	NA	NA	NA	NA	NA	NA	NA	0.372
4930447C04Rik	chr12	-	72909903	72910091	72909770	72909813	72913184	72913274	NA	NA	0.888667	0.838667	0.737	NA	1	1	NA	NA	0.949333	NA	0.650333	0.695	0.205	0.727333	0.861	0.522	NA	0.655667	0.795
4930447C04Rik	chr12	-	72909903	72910091	72909770	72909813	72915355	72915482	NA	NA	NA	NA	NA	NA	0.871667	NA	NA	NA	NA	NA	1	0.722	NA	NA	NA	1	NA	NA	0.278
4930447C04Rik	chr12	-	72913184	72913274	72892803	72892979	72915355	72915482	1	NA	1	1	0.974667	NA	NA	NA	0.958333	1	1	1	NA	NA	1	NA	NA	NA	0.899667	1	0.100333
4930447C04Rik	chr12	-	72913184	72913274	72909770	72909813	72915355	72915482	1	NA	1	NA	0.934333	NA	0.899667	1	1	NA	1	NA	1	0.965667	NA	1	NA	1	NA	1	0.100333
4930447C04Rik	chr12	-	72913184	72913274	72909903	72910091	72915355	72915482	NA	NA	NA	1	NA	NA	1	1	1	0.937667	NA	1	0.89	1	1	1	1	0.965667	NA	1	0.11
4930447C04Rik	chr12	-	72915355	72915482	72909770	72909813	72916673	72916730	NA	NA	NA	NA	NA	NA	1	NA	NA	NA	NA	NA	0.866	1	NA	NA	NA	NA	NA	NA	0.134
4930447C04Rik	chr12	-	72915355	72915482	72913184	72913274	72916673	72916730	0.609667	0.659333	0.706333	0.592	0.681	0.494667	0.658667	0.722333	0.648667	0.679	0.703	0.658	0.586667	0.825	0.744	0.654	0.671667	0.593	0.61	0.712667	0.330333
4930447M23Rik	chr2	+	19347564	19347687	19344316	19345119	19348513	19348611	NA	NA	NA	NA	NA	NA	1	NA	1	0.666667	0.867333	1	NA	1	NA	0.933667	NA	1	NA	NA	0.333333
4930447M23Rik	chr2	+	19347564	19347687	19344316	19345119	19348513	19348936	NA	NA	NA	NA	NA	NA	NA	NA	1	0.666667	NA	1	NA	NA	NA	0.933667	NA	NA	NA	NA	0.333333
4930447M23Rik	chr2	+	19347564	19347687	19344837	19345167	19348513	19348611	NA	NA	1	NA	NA	NA	1	NA	NA	NA	0.926333	1	NA	0.852667	NA	1	NA	0.778667	NA	NA	0.221333
4930447M23Rik	chr2	+	19347564	19347687	19344936	19345167	19348513	19348936	NA	NA	NA	NA	NA	NA	1	NA	NA	NA	NA	1	1	0.852667	NA	NA	NA	0.778667	0.905333	1	0.221333
4930451G09Rik	chr16	+	4971851	4971969	4968935	4969185	4974037	4974179	1	1	0.943333	0.959333	1	0.666667	0.969	1	0.918333	1	1	0.897333	0.936667	1	0.95	0.940667	0.881	1	1	0.956667	0.333333
4930451G09Rik	chr16	+	4971851	4971969	4968935	4969185	4976142	4976289	1	NA	0.859333	0.828333	0.843	NA	0.927667	1	0.913	0.940667	NA	0.824333	1	0.965667	0.847333	0.755333	NA	0.869	0.823	0.827333	0.244667
4930451G09Rik	chr16	+	4974037	4974179	4968935	4969185	4976142	4976289	1	1	0.944333	0.773	0.934667	1	0.962667	1	0.926	0.964667	1	0.855	1	0.977	0.916667	0.865333	0.944333	0.945667	0.896	0.879667	0.227
4930452B06Rik	chr14	-	8473350	8473412	8442855	8442950	8510861	8511193	NA	1	NA	1	1	0.875333	NA	1	1	0.981333	1	0.98	1	1	1	1	0.963	1	1	0.956333	0.124667
4930452B06Rik	chr14	-	8482416	8482620	8473350	8473412	8510861	8511193	0.899	0.919333	0.905	0.896667	0.943	0.943667	0.977	0.865	0.887333	0.967333	0.940667	0.949333	0.951	0.908667	0.950333	0.928	0.965667	0.89	0.933333	0.908667	0.112
4930452B06Rik	chr14	-	8644396	8644469	8578347	8578462	8659388	8659482	0.85	0.942333	0.816	0.825667	0.804667	0.859667	0.815	0.900667	0.790333	0.835667	0.832667	0.863667	0.834	0.931667	0.814333	0.821	0.84	0.859	0.913	0.848333	0.152
4930480K23Rik	chr14	+	69739406	69739495	69738237	69738387	69740724	69740849	0.928333	NA	0.695333	1	0.951333	0.908	0.875	0.872333	0.887	0.892667	0.975333	1	0.935667	1	0.937667	0.946667	0.927333	0.8	0.929	0.989333	0.304667
4930480K23Rik	chr14	+	69740724	69740849	69738237	69738387	69743412	69745869	0.926	NA	1	NA	1	NA	1	0.926	0.916667	0.629667	0.866667	1	1	1	1	NA	0.766667	NA	0.929667	1	0.370333
4930481A15Rik	chr19	+	5415007	5415099	5406814	5407083	5415606	5415812	0.797667	0.752333	0.736667	0.362667	0.902667	0.798333	0.761	0.539	0.909333	0.582333	0.594667	0.901333	0.756	0.549667	0.868667	0.677667	0.512	0.710667	0.549	0.628	0.546667
4930481A15Rik	chr19	+	5415007	5415112	5406873	5407083	5415606	5415812	0.9	0.798333	0.791667	0.65	0.957667	0.883667	0.864667	0.718333	0.959333	0.756333	0.847	0.943667	0.871333	0.744	0.905667	0.878333	0.745	0.769	0.695	0.752667	0.309333
4930481A15Rik	chr19	+	5417393	5418251	5415606	5415812	5422120	5422847	1	NA	1	NA	NA	1	1	1	0.909333	1	1	0.915	1	0.902333	1	1	1	0.811	0.945333	1	0.189
4930503L19Rik	chr18	-	70456473	70456544	70452211	70453388	70463961	70464064	NA	0.555333	0.755667	NA	0.890333	0.715	0.862667	0.718333	0.787	0.709667	0.813333	NA	0.837667	NA	NA	NA	0.777667	NA	0.789667	0.785	0.335
4930503L19Rik	chr18	-	70456473	70456544	70453193	70453388	70463961	70464064	0.735333	0.555333	0.755667	0.741333	0.890333	0.715	0.862667	0.718333	0.787	0.709667	0.813333	0.776	0.837667	0.643	0.765	0.655667	0.777667	0.707667	0.789667	0.785	0.335
4930503L19Rik	chr18	-	70456473	70456544	70453193	70453388	70467330	70467456	NA	NA	NA	NA	NA	NA	NA	NA	NA	0.845333	NA	NA	NA	0.791667	0.911667	0.870667	NA	0.813667	NA	NA	0.12
4930503L19Rik	chr18	-	70456473	70456544	70453193	70453388	70467334	70467485	0.907333	0.76	0.981	0.895	0.812	0.871333	0.983	0.880667	NA	0.951333	NA	NA	0.931333	0.867333	0.959667	0.920667	NA	0.854333	0.915333	0.959667	0.223
4930503L19Rik	chr18	-	70458316	70458448	70452211	70453388	70463961	70464064	0.670333	0.454667	0.65	0.687667	NA	0.68	NA	0.729667	0.806667	0.762333	0.815	0.769333	0.823	0.576667	0.739	0.578333	0.788333	0.647667	0.804	0.756333	0.368333
4930503L19Rik	chr18	-	70458316	70458448	70452211	70453388	70463961	70464150	NA	NA	NA	NA	NA	NA	0.870667	0.729667	NA	NA	0.815	NA	0.823	NA	NA	NA	0.788333	NA	0.804	NA	0.141
4930503L19Rik	chr18	-	70458316	70458448	70452211	70453388	70467330	70467456	0.0816667	0	NA	0.0526667	NA	0.245333	NA	0.0323333	0.109	0.0153333	0	0.023	NA	0.0696667	NA	0.221	0.112	0.129333	0.0513333	0.0216667	0.245333
4930503L19Rik	chr18	-	70458316	70458448	70452211	70453388	70467334	70467485	NA	0.0146667	NA	0.107	NA	0	NA	0.0433333	NA	0.112	0	0.019	NA	0.07	NA	0.199333	NA	0.138	0.0326667	0.140667	0.199333
4930503L19Rik	chr18	-	70463961	70464064	70452212	70453388	70467330	70467456	0.871333	0.787333	0.947667	0.732667	0.925333	0.775667	0.949	0.770333	0.924667	0.792667	0.8	0.805	0.825	0.738	0.859	0.812	0.726333	0.736	0.758333	0.859333	0.222667
4930503L19Rik	chr18	-	70463961	70464064	70452212	70453388	70467334	70467485	0.922667	0.864667	0.99	0.909333	0.801333	0.910333	0.978667	0.898333	0.979	0.97	0.966667	0.909667	0.950667	0.904333	0.962667	0.932	0.975667	0.871667	0.934	0.965	0.188667
4930503L19Rik	chr18	-	70468220	70468517	70467334	70467485	70469493	70469754	NA	1	NA	1	NA	0.886	NA	1	NA	NA	NA	0.865667	NA	0.901	NA	1	NA	1	NA	NA	0.134333
4930506C21Rik	chr17	-	8297028	8297243	8293944	8294076	8298479	8298637	NA	NA	NA	NA	NA	NA	NA	NA	NA	0.666667	NA	0.896	NA	0.498667	NA	1	NA	NA	1	NA	0.501333
4930509G22Rik	chr16	+	11179634	11179771	11178175	11179512	11180132	11180328	0.0356667	NA	NA	0.505333	0	NA	NA	0.129	NA	0.472333	0.774333	0.196333	NA	0	NA	NA	NA	NA	0.363333	NA	0.774333
4930513N10Rik	chr8	+	95816367	95816446	95810230	95810297	95821422	95821728	0.118333	0	0	0.0566667	0.0966667	NA	0.0546667	0	0	0	0	0	0.0896667	0	0.149667	0.0693333	0.0193333	0.128667	0	0.0466667	0.149667
4930520O04Rik	chr9	+	114368843	114368899	114368302	114368484	114368988	114369063	0.891333	NA	NA	NA	NA	0.911333	NA	0.624333	1	0.694	0.802667	NA	0.567	0.836333	0.687667	NA	0.666667	0.949	0.72	0.396	0.604
4930522L14Rik	chr5	-	109738949	109739010	109735989	109737799	109751594	109751597	0.770667	NA	NA	NA	NA	NA	0.958667	0.827	0.839333	NA	0.812	NA	0.736667	NA	NA	NA	NA	NA	0.716	NA	0.242667
4930522L14Rik	chr5	-	109739198	109739325	109735989	109737799	109751594	109751597	0.897	1	0.877667	0.954333	0.977	1	0.983333	0.949667	0.941667	0.928333	0.950667	1	0.889333	0.914333	0.89	0.914	0.879333	0.889667	0.941	NA	0.122333
4930523C07Rik	chr1	+	160044932	160045025	160044446	160044753	160070699	160070803	0	NA	0	NA	0.0166667	0	0	0	0	0	0	0.195667	0.087	0	0.027	0	0.013	0	0.0416667	0	0.195667
4930523C07Rik	chr1	+	160070122	160070232	160044383	160044753	160070699	160070803	0.0713333	NA	0.0236667	0	0.0236667	0	0.028	0.108667	0.07	0.0353333	0.013	0.178333	0.0196667	0	0	0	0.022	0	0	0.0343333	0.178333
4930523C07Rik	chr1	+	160070699	160070803	160044383	160044753	160075030	160080208	0.815	NA	0.802667	1	0.957333	1	0.871	0.791333	0.773	0.830667	0.865	0.860667	0.904667	0.759333	0.789667	0.537667	0.855333	0.764333	0.873	0.863	0.462333
4930524B15Rik	chr11	+	31973555	31973641	31965591	31965951	31975036	31975135	NA	NA	NA	NA	NA	NA	0.409667	NA	NA	NA	NA	NA	0.666667	NA	NA	NA	NA	NA	NA	0.666667	0.257
4930539E08Rik	chr17	-	28909291	28909872	28908267	28908387	28915168	28915324	NA	NA	NA	NA	NA	NA	NA	NA	NA	NA	NA	NA	1	NA	NA	NA	NA	NA	NA	0.851	0.149
4930550C14Rik	chr9	+	53408052	53408142	53405285	53405325	53411746	53411839	NA	NA	NA	NA	0.846	NA	NA	NA	NA	NA	NA	NA	0.789333	NA	0.402667	NA	1	NA	NA	NA	0.597333
4930550C14Rik	chr9	+	53408052	53408142	53405285	53405325	53414338	53414392	NA	NA	0.512667	NA	NA	NA	0.272333	NA	0.333333	NA	NA	NA	0.333333	0.456	0.333333	NA	0.563667	NA	0.531	NA	0.291333
4930550C14Rik	chr9	+	53411746	53411839	53405285	53405325	53414338	53414392	NA	NA	NA	NA	0.454667	NA	0.242667	NA	0.544	NA	NA	NA	0.454667	NA	0.421	NA	0.449333	NA	0.454667	NA	0.301333
4930550C14Rik	chr9	+	53411746	53411839	53408052	53408142	53414338	53414392	NA	NA	NA	NA	1	NA	0.407667	NA	NA	NA	NA	NA	0.925	NA	NA	0.333333	0.486	NA	0.299333	NA	0.700667
4930550C14Rik	chr9	+	53414338	53414392	53405285	53405325	53421568	53421769	NA	NA	NA	NA	NA	NA	0.912	NA	1	NA	1	NA	0.925667	1	1	1	1	0.861	NA	NA	0.139
4930550C14Rik	chr9	+	53421568	53421769	53414338	53414392	53422887	53423018	1	NA	1	NA	0.889333	1	NA	NA	1	NA	1	NA	1	NA	0.918	1	0.906333	1	NA	NA	0.110667
4930570G19Rik	chr3	-	156551854	156551943	156548414	156551237	156561475	156561675	NA	NA	NA	NA	NA	NA	NA	NA	NA	NA	NA	NA	NA	0.742	NA	NA	NA	NA	0.0423333	0.0226667	0.719333
4930578C19Rik	chrX	-	18416741	18416789	18414880	18416093	18418323	18419246	NA	NA	NA	NA	NA	NA	NA	0.666667	NA	NA	NA	0.333333	NA	0.228	NA	NA	NA	NA	NA	NA	0.438667
4930581F22Rik	chr9	+	35117564	35117856	35117368	35117432	35118198	35118269	NA	NA	NA	NA	NA	NA	NA	NA	NA	1	NA	1	NA	1	1	0.922333	NA	0.866667	NA	NA	0.133333
4930581F22Rik	chr9	+	35123600	35123694	35117368	35118346	35126211	35126390	NA	0.477333	NA	0.309333	0.608	NA	0.510333	0.504	0.377667	0.396667	0.644333	0.483667	0.263333	0.449667	0.454	0.365333	0.405333	0.29	0.691	0.557	0.427667
4930581F22Rik	chr9	+	35123600	35123694	35117368	35118346	35128778	35128837	NA	NA	NA	NA	NA	NA	1	0.787667	1	1	NA	1	1	0.844333	0.666667	1	NA	1	1	1	0.333333
4930581F22Rik	chr9	+	35123600	35123694	35117368	35118346	35129831	35130922	NA	NA	NA	NA	NA	NA	0.575333	1	NA	1	0.898333	0.945667	0.787667	0.787667	NA	0.838333	0.666667	0.868	0.933333	0.904	0.424667
4930594M22Rik	chr14	+	122923621	122923677	122913066	122913292	122926129	122929442	0.268667	NA	NA	NA	NA	NA	NA	0.329333	NA	NA	NA	NA	NA	NA	NA	NA	NA	NA	0.526667	NA	0.258
4931406C07Rik	chr9	-	15294685	15294759	15294431	15294533	15301366	15301513	1	1	0.864667	0.989	NA	1	1	0.989333	0.959333	0.963667	1	0.973667	1	1	0.977667	0.964333	0.975333	1	1	0.966	0.135333
4931406C07Rik	chr9	-	15294685	15294759	15294431	15294533	15301366	15301607	1	NA	0.864667	NA	0.962	1	NA	NA	NA	NA	1	NA	1	1	0.977667	0.964333	0.975333	1	NA	0.966	0.135333
4931406P16Rik	chr7	-	34312088	34312176	34263552	34263750	34313486	34313545	NA	NA	NA	NA	NA	NA	NA	0.409	NA	NA	NA	NA	NA	NA	NA	NA	NA	NA	0.666667	NA	0.257667
4931406P16Rik	chr7	-	34312088	34312176	34285476	34285953	34313486	34313522	NA	NA	NA	0.328333	NA	NA	0.367	NA	0.336	0.252667	0.307	0.259	NA	0.278667	0.279	0.244333	NA	0.287	0.376	0.312667	0.131667
4931406P16Rik	chr7	-	34312088	34312176	34285476	34285953	34313486	34313545	0.374667	NA	0.295667	0.328333	0.232333	0.128667	0.367	0.150333	0.336	0.252667	0.307	0.259	0.178	0.278667	0.279	NA	0.239333	0.287	0.376	0.312667	0.247333
4931428F04Rik	chr8	-	105288768	105289165	105285255	105285869	105289403	105289528	0.437333	0.623333	0.474667	0.574333	0.448	0.406667	0.471667	0.464667	0.417	0.455667	0.414333	0.493	0.392333	0.359	0.405667	0.386333	0.352	0.394667	0.448667	0.427	0.271333
4932435O22Rik	chr11	-	114423530	114423797	114413400	114416350	114448671	114448860	NA	NA	0.952667	NA	0.814667	NA	1	NA	0.906	NA	0.933	NA	0.747333	NA	0.868333	NA	0.593	NA	NA	NA	0.407
4932438A13Rik	chr3	+	36965520	36965671	36964874	36965026	36965841	36965994	1	0.984667	0.982	0.980333	1	NA	1	1	0.981333	1	0.957	0.943	0.970667	1	0.878667	1	0.916	1	1	0.913333	0.121333
4932438A13Rik	chr3	+	36992676	36992727	36989794	36989888	36994774	36994981	0.223	NA	0.144	0.310667	0.188333	0.249667	0.265333	0.362333	0.0913333	0.208	0.145	0.295333	0.163667	0.48	0.188	0.444333	0.114333	0.317667	0.349667	0.288333	0.388667
4932438A13Rik	chr3	+	37012484	37012685	37011567	37011794	37012879	37013010	0.0193333	0	0.0166667	0.00433333	0.023	0	0.00466667	0.006	0.0173333	0.006	0.00533333	0.003	0	0.005	0	0.00166667	0.00466667	0.004	0.057	0.153	0.153
4932438A13Rik	chr3	+	37022969	37023032	37022383	37022474	37026089	37026343	0.396	0.614	0.398667	0.653333	0.444	0.679667	0.463333	0.580667	0.38	0.537667	0.471	0.582333	0.404333	0.539667	0.419	0.517667	0.491333	0.538667	0.326333	0.256667	0.423
4932441J04Rik	chr5	-	57709694	57709754	57601307	57601470	57717845	57717920	NA	NA	NA	NA	NA	NA	1	NA	NA	NA	NA	NA	NA	NA	NA	NA	NA	NA	0.89	NA	0.11
4932441J04Rik	chr5	-	57709694	57709754	57661910	57662004	57717845	57717920	0.941667	NA	0.694333	NA	0.950667	NA	0.853667	NA	0.774333	NA	0.905667	0.89	0.615667	1	0.891	0.858333	0.936667	0.938333	0.643667	0.930333	0.384333
4933404O12Rik	chr5	+	136920430	136920770	136919400	136919431	136922306	136922427	0.116667	0.00866667	NA	0.0193333	0	0	0.0256667	0	0.035	0	0	0.006	0	0.00733333	0.021	0.00666667	0	0	0.00866667	0	0.116667
4933406C10Rik	chr12	-	32931957	32932024	32924956	32925535	32942282	32942398	NA	NA	NA	NA	NA	NA	NA	NA	1	NA	NA	NA	NA	0.333333	NA	NA	NA	NA	NA	0.739	0.666667
4933406C10Rik	chr12	-	32942282	32942398	32924956	32925535	32953197	32953371	NA	NA	NA	NA	0.333333	NA	1	0.666667	0.935333	0.812667	NA	0.715667	0.891667	NA	0.666667	0.780667	NA	0.705	1	1	0.666667
4933407K13Rik	chrX	-	75709243	75710703	75706931	75708459	75727457	75727518	0.370333	0.427667	1	0.449	0.696667	0.452667	1	0.225667	0.191333	0.2	NA	0.471333	1	0.226333	0.785333	0.171333	NA	0.317333	1	0.795667	0.828667
4933407K13Rik	chrX	-	75741815	75741978	75725464	75727518	75746676	75746839	NA	NA	NA	NA	NA	NA	NA	NA	1	NA	NA	NA	0.895	NA	0.932	1	1	NA	NA	NA	0.105
4933407K13Rik	chrX	-	75755365	75755528	75751524	75751687	75760231	75760394	0.964333	0.578333	0.938333	0.973	0.908333	0.951	0.964	0.919333	0.962667	0.902667	0.947667	0.960667	0.974333	0.957	0.969333	0.945	0.951333	0.941333	0.976667	0.956	0.398333
4933408B17Rik	chr18	-	34584837	34584906	34580799	34580977	34586241	34586331	0.906667	1	1	0.829	0.852667	NA	0.841	0.873333	0.931333	0.964333	0.89	0.823	0.784	0.939667	0.854333	1	0.886333	0.804	0.683667	0.886333	0.316333
4933408B17Rik	chr18	-	34584837	34584906	34580799	34580977	34592914	34593060	NA	1	0.464	NA	0.759667	NA	0.592667	0.495333	0.612	0.589333	0.561333	0.294333	0.545333	0.779	0.464	0.487667	NA	0.539	1	0.301	0.705667
4933408B17Rik	chr18	-	34586241	34586331	34580799	34580977	34592914	34593060	0.822	NA	0.721667	0.741667	0.772333	NA	0.691	0.568667	0.780333	0.551667	0.585333	0.548333	0.668	0.766667	0.668	0.285	0.759667	0.640667	1	0.287	0.715
4933408B17Rik	chr18	-	34586241	34586331	34584837	34584906	34592914	34593060	1	NA	0.941	0.949	1	NA	0.891333	0.866	0.914667	0.920667	0.975667	0.922667	0.914667	0.965667	0.955	0.745333	0.864	0.789333	0.849	0.937667	0.254667
4933408J17Rik	chr10	+	93595809	93596281	93589412	93589770	93598975	93599510	NA	NA	NA	NA	NA	NA	NA	NA	NA	NA	NA	NA	NA	1	NA	0.666667	NA	NA	NA	NA	0.333333
4933427D14Rik	chr11	-	72159399	72159520	72155392	72155438	72166637	72166823	0.88	NA	NA	1	1	NA	1	1	0.965333	1	0.956333	0.758667	1	0.945333	1	0.967	1	1	NA	1	0.241333
4933427D14Rik	chr11	-	72165516	72165598	72159399	72159520	72166637	72166823	0.94	0.963333	0.978	0.928333	0.976	0.982667	0.958333	0.953333	0.940667	0.922333	0.944333	0.956667	0.882667	0.913	0.877333	0.909667	0.898333	0.902	0.952667	0.950333	0.105333
4933427D14Rik	chr11	-	72166637	72166823	72159399	72159520	72175202	72175238	NA	NA	NA	NA	NA	NA	0.815333	NA	NA	NA	NA	NA	NA	NA	NA	NA	NA	NA	1	NA	0.184667
4933427D14Rik	chr11	-	72191277	72191344	72189547	72189758	72191418	72191634	0.294	NA	0.273667	0.235667	0.312333	0.277667	0.300667	0.24	0.239667	0.230333	0.239667	0.246	0.308	0.301	0.343	0.409333	0.325	0.269	0.210667	0.312333	0.198667
4933430I17Rik	chr4	+	62525781	62525878	62525368	62525396	62532251	62532404	0.939333	NA	0.744667	0.918667	0.815333	NA	0.773667	0.836667	0.861667	0.678333	0.677	0.825333	1	0.939333	1	0.843333	0.786667	0.788667	0.341	0.63	0.659
4933430I17Rik	chr4	+	62536510	62536568	62532515	62532660	62538862	62538963	1	NA	0.857	0.895667	1	NA	0.654	0.749667	0.890667	0.747333	0.877	0.957333	0.918333	0.883	1	0.895667	0.803333	0.924667	0.667333	0.934667	0.346
4933430I17Rik	chr4	+	62543127	62543215	62542635	62542783	62543454	62543501	0.915333	NA	0.677	0.738	0.846667	NA	0.813	1	0.459333	0.900333	0.846667	0.522	NA	NA	0.502667	0.589	1	NA	0.79	0.908333	0.540667
4933430I17Rik	chr4	+	62543454	62543501	62542635	62542783	62543696	62543739	0.792	NA	0.604333	0.873	0.731667	NA	0.566333	0.467333	0.817333	0.566	0.713	0.527333	0.562	NA	0.721667	0.608667	NA	0.670333	0.328	0.641	0.545
4933430I17Rik	chr4	+	62547264	62547328	62546019	62546141	62547532	62547993	0.877333	1	0.947	0.845333	0.898333	1	0.869	0.768333	0.829	0.671	0.809333	0.745	0.710667	0.874667	0.838	0.868333	0.841667	0.829	0.610667	0.735667	0.389333
4933431E20Rik	chr3	-	107894050	107894208	107893472	107893507	107895642	107895800	1	1	1	0.974333	0.901333	0.928667	0.874667	0.927667	0.964667	0.936667	0.934667	0.963333	0.748667	0.879	0.902667	0.965	0.863	0.922667	0.942333	0.970333	0.251333
4933431E20Rik	chr3	-	107894050	107894215	107893502	107893507	107895642	107895798	1	1	1	0.974333	0.914	0.936667	0.883667	0.932667	0.969333	0.938667	0.942333	0.968333	0.783667	0.891333	0.919333	0.968	0.886667	0.93	0.947	0.974667	0.216333
4933431E20Rik	chr3	-	107894050	107894228	107888849	107893507	107895642	107896213	NA	1	1	0.981	NA	0.951333	0.883333	0.941667	0.972333	0.949	NA	0.967333	0.796333	0.893667	0.922333	0.969667	0.883333	0.941	0.951	0.975667	0.203667
4933431E20Rik	chr3	-	107894050	107894228	107892894	107893507	107895642	107896213	1	1	1	NA	0.923667	0.951333	0.883333	NA	0.972333	NA	0.946333	0.967333	0.796333	0.893667	0.922333	0.969667	0.883333	0.941	0.951	NA	0.203667
4933431E20Rik	chr3	-	107894050	107894992	107892863	107893507	107895642	107895692	1	1	1	0.933	0.771	0.853667	0.731333	0.841333	0.910333	0.851	0.859667	0.907	0.507667	0.718333	0.835333	0.912	0.789667	0.859667	0.854333	0.923	0.492333
4933431E20Rik	chr3	-	107894588	107894656	107890032	107893507	107894860	107894992	NA	NA	NA	NA	NA	NA	1	0.886667	NA	0.907333	NA	0.666667	NA	0.797667	NA	1	0.666667	NA	NA	NA	0.333333
4933431E20Rik	chr3	-	107894588	107894656	107890032	107893507	107895642	107895763	NA	NA	NA	NA	NA	NA	0.516333	0.497667	0.464333	NA	NA	0.628667	0.320667	0.212667	0.748333	NA	NA	0.713	0.255	0.521333	0.535667
4933431E20Rik	chr3	-	107894588	107894656	107893502	107893507	107895642	107895763	NA	NA	NA	NA	NA	NA	0.516333	NA	NA	NA	0.379667	0.628667	0.320667	NA	0.748333	NA	NA	0.713	NA	NA	0.427667
4933431E20Rik	chr3	-	107894588	107894656	107894050	107894215	107894860	107894992	0.726	NA	NA	0.22	0.553333	NA	0.620667	0.556333	0.457667	0.575	0.0816667	0.506667	0.543333	0.688333	NA	0.509667	0.435333	0.247333	0.346	0.591333	0.644333
4933431E20Rik	chr3	-	107894588	107894656	107894050	107894215	107895642	107895763	0.0186667	NA	0.09	0.0593333	0.198	NA	0.384667	0.255333	0.129667	0.0543333	0.091	0.124667	0.382	0.283	0.420667	0.356	0.150333	0.347667	0.198333	0.347667	0.402
4933431E20Rik	chr3	-	107894588	107894656	107894050	107894228	107894860	107894992	0.154667	0.0816667	0.172333	0.194667	0.306	NA	0.339333	0.241333	0.136333	0.379	0.214333	0.303	0.415	0.429667	NA	0.440333	0.352333	0.408	0.092	0.318667	0.358667
4933431E20Rik	chr3	-	107894588	107894656	107894050	107894228	107895642	107895763	0.079	NA	0.293667	0.065	0.121667	0	0.215667	0.123	0.140333	0.0736667	0.142667	0.199333	0.203667	0.195667	0.213333	0.264	0.120667	0.194667	0.067	0.116	0.293667
4933431E20Rik	chr3	-	107894860	107894992	107893123	107893507	107895642	107895809	NA	NA	NA	NA	0.778667	NA	0.695333	NA	0.913333	NA	0.893667	NA	NA	0.710667	0.871	NA	NA	0.891333	NA	NA	0.218
4933431E20Rik	chr3	-	107894860	107894992	107893472	107893507	107895642	107895812	NA	NA	1	0.951333	NA	0.888667	0.695333	0.877333	0.913333	0.855	NA	0.916667	0.498	0.710667	0.871	0.899	0.841	0.891333	0.876667	0.928	0.502
4933431E20Rik	chr3	-	107894860	107894992	107894050	107894208	107895642	107895800	1	NA	0.924333	NA	0.947667	1	0.947667	NA	0.951333	NA	NA	NA	0.924333	NA	NA	0.943	NA	0.932	0.774333	NA	0.225667
4933431E20Rik	chr3	-	107894860	107894992	107894050	107894208	107895642	107895812	NA	NA	0.924333	0.857333	NA	1	0.947667	0.911667	0.951333	0.907333	NA	1	0.924333	0.917667	NA	0.943	1	0.932	0.774333	0.943667	0.225667
4933431E20Rik	chr3	-	107894860	107894992	107894050	107894228	107895642	107895800	0.454667	0.663333	0.641333	NA	0.366	0.361	0.52	NA	0.477333	NA	0.460667	0.531667	0.323	NA	0.316	0.554667	0.322	0.414667	0.439667	NA	0.347333
4933431E20Rik	chr3	-	107894860	107894992	107894050	107894228	107895642	107895809	NA	NA	NA	NA	0.366	NA	0.52	NA	0.477333	NA	0.460667	NA	NA	0.446	0.316	NA	NA	0.414667	NA	NA	0.204
4933431E20Rik	chr3	-	107894860	107894992	107894050	107894228	107895642	107895812	NA	0.663333	0.641333	0.573333	NA	0.361	0.52	0.434667	0.477333	0.387667	NA	0.531667	0.323	0.446	0.316	0.554667	0.322	0.414667	0.439667	0.449	0.347333
4933431E20Rik	chr3	-	107894860	107894992	107894128	107894215	107895642	107895800	0.486333	NA	0.550667	NA	0.506	0.758	0.541	NA	0.435333	NA	0.589	0.481333	0.430333	NA	0.322667	0.633667	0.314333	0.590667	0.576333	NA	0.443667
4933431E20Rik	chr3	-	107894860	107894992	107894128	107894215	107895642	107895809	NA	NA	NA	NA	0.506	NA	0.541	NA	0.435333	NA	0.589	NA	NA	0.51	0.322667	NA	NA	0.590667	NA	NA	0.268
4933431E20Rik	chr3	-	107894860	107894992	107894128	107894215	107895642	107895812	NA	NA	0.550667	0.576667	NA	0.758	0.541	0.596	0.435333	0.514333	NA	0.481333	0.430333	0.51	0.322667	0.633667	0.314333	0.590667	0.576333	0.607333	0.443667
4933431E20Rik	chr3	-	107894860	107894992	107894588	107894656	107895642	107895800	0.982333	NA	0.921333	NA	0.867	1	0.696333	NA	0.801	NA	0.840667	0.871	0.583667	NA	0.440667	0.825	0.707667	0.664667	0.847667	NA	0.559333
4933431E20Rik	chr3	-	107894860	107894992	107894588	107894656	107895642	107895809	NA	NA	NA	NA	0.867	NA	0.696333	NA	0.801	NA	0.840667	NA	NA	0.901333	0.440667	NA	NA	0.664667	NA	NA	0.460667
4933431E20Rik	chr3	-	107894860	107894992	107894588	107894656	107895642	107895812	NA	NA	0.921333	1	NA	NA	0.696333	0.747333	0.801	0.951333	NA	0.871	0.583667	0.901333	0.440667	0.825	0.707667	0.664667	0.847667	0.893	0.559333
4933431K23Rik	chr8	+	77758050	77758147	77755386	77755566	77767274	77768970	NA	NA	NA	0.949667	NA	NA	NA	0.719333	NA	0.731667	NA	0.701333	NA	0.606	NA	0.822667	NA	0.686667	NA	NA	0.343667
4933434E20Rik	chr3	+	90056206	90056324	90052899	90053119	90058484	90058651	1	NA	NA	NA	NA	NA	0.953667	1	NA	NA	1	NA	0.835667	1	1	NA	NA	NA	0.956667	1	0.164333
4933434E20Rik	chr3	+	90056528	90056582	90053507	90053609	90058484	90058651	0.941333	0.885	0.928333	0.927667	0.934	0.937	0.915	0.917667	0.860667	0.931	0.895	0.946333	0.907667	0.978	0.901333	0.927	0.877333	0.959667	0.930333	0.869667	0.117333
4933434E20Rik	chr3	+	90056528	90056582	90053507	90053609	90061637	90062018	NA	NA	NA	NA	NA	NA	NA	NA	NA	NA	NA	NA	NA	NA	NA	NA	1	0.861	NA	NA	0.139
4933434E20Rik	chr3	+	90056528	90056582	90053507	90053609	90061637	90063341	NA	NA	NA	NA	NA	NA	NA	NA	NA	NA	NA	1	NA	NA	NA	1	NA	0.861	NA	NA	0.139
4933434E20Rik	chr3	+	90058484	90058651	90053507	90053609	90061637	90062018	NA	NA	NA	NA	NA	NA	NA	NA	NA	NA	NA	1	NA	1	NA	1	1	0.877	NA	NA	0.123
5031414D18Rik	chr14	+	75038338	75038440	75036009	75036211	75038871	75038932	NA	NA	NA	NA	NA	NA	NA	1	NA	NA	NA	NA	NA	0.827333	NA	1	NA	1	NA	NA	0.172667
5031425E22Rik	chr5	-	23386863	23387037	23385074	23385172	23390055	23390306	0.583333	NA	0.852	NA	1	NA	0.829	0.341333	0.852	NA	0.657	0.485	0.853333	NA	0.693667	NA	0.691667	NA	0.811	0.792667	0.658667
5031425E22Rik	chr5	-	23386863	23387037	23385074	23385172	23433209	23433324	0.253	0.265333	0.201667	0.0726667	0.185667	NA	0.324333	NA	0.472667	0.221	0.265667	0.115333	0.353333	0	0.211333	0	0.329333	0.162667	NA	NA	0.472667
5031425E22Rik	chr5	-	23390055	23390306	23385074	23385172	23433209	23433324	0.122333	0	0.0333333	NA	0	NA	0.0323333	0.138667	0.00833333	NA	0.09	0.0446667	0.061	0	0.0563333	NA	0.0936667	0.0833333	0.138667	0.072	0.138667
5031425E22Rik	chr5	-	23411041	23411121	23403725	23403816	23433209	23433336	0.168	NA	NA	NA	0.244667	NA	0.438	0.222667	0.595	0.793	0.286	0.492667	0.459667	0.0963333	0	NA	0.282333	NA	0.108	0.078	0.793
5031425E22Rik	chr5	-	23423223	23423343	23422403	23422902	23433209	23433309	0.835	NA	0.868333	0.967333	1	1	0.975667	1	0.801333	0.863667	0.909667	0.927	0.934333	1	1	1	0.873667	0.800667	0.855	0.874333	0.199333
5033403F01Rik	chr13	+	38964467	38964670	38960618	38961222	38965734	38966299	NA	NA	NA	NA	NA	NA	NA	NA	NA	NA	1	NA	1	NA	1	NA	0.811	NA	NA	NA	0.189
5033428I22Rik	chr8	+	57332769	57333631	57332442	57332633	57338882	57338947	NA	NA	0.495667	0.313	NA	NA	NA	NA	0.606667	0.472	NA	NA	NA	NA	NA	0.521667	NA	NA	NA	NA	0.293667
5033428I22Rik	chr8	+	57332769	57333631	57332442	57332633	57339828	57340682	NA	NA	1	0.875333	NA	NA	NA	NA	1	0.799667	NA	NA	NA	NA	NA	0.871667	NA	NA	NA	NA	0.200333
5033428I22Rik	chr8	+	57338882	57338947	57332442	57332633	57339828	57340682	NA	NA	NA	0.953333	NA	NA	NA	NA	1	0.871667	NA	NA	NA	NA	NA	0.924	NA	NA	NA	NA	0.128333
5033428I22Rik	chr8	+	57338882	57338947	57332769	57333631	57339828	57340682	NA	NA	NA	0.989333	NA	NA	NA	NA	1	0.977	NA	NA	NA	NA	NA	0.873	NA	NA	NA	NA	0.127
5330417C22Rik	chr3	-	108491998	108492119	108488829	108489022	108536295	108536527	NA	NA	1	NA	NA	NA	1	NA	NA	NA	NA	NA	NA	NA	NA	NA	NA	NA	0.835333	0.932333	0.164667
5330434G04Rik	chrX	-	105378015	105378120	105375661	105375837	105382752	105382949	0.147667	NA	NA	0.117333	NA	NA	NA	0.315	NA	0.373333	NA	0	NA	0	NA	NA	NA	NA	0.188667	NA	0.373333
5330434G04Rik	chrX	-	105382752	105382949	105350359	105351199	105387881	105387914	0.812333	NA	NA	1	1	NA	NA	1	NA	NA	NA	1	NA	NA	NA	NA	NA	NA	0.886667	NA	0.187667
5330434G04Rik	chrX	-	105389869	105389943	105387881	105387936	105391475	105391754	0.548333	0.143333	0.179333	0.125	0.235333	NA	NA	0.278333	NA	0.421667	0.128667	0.067	NA	0.290333	NA	NA	NA	NA	0.0863333	0.367	0.481333
5430402O13Rik	chr6	+	50575465	50575532	50566737	50567022	50589908	50589974	0.131333	NA	NA	NA	0.082	NA	0.464667	NA	0	NA	NA	NA	0.175667	NA	0	0	0.289667	0.082	0.0223333	0.086	0.464667
5430403G16Rik	chr5	-	109678513	109678574	109674544	109677391	109690735	109691041	NA	NA	NA	NA	0.947667	NA	NA	NA	0.875667	NA	1	NA	NA	NA	NA	NA	NA	NA	NA	NA	0.124333
5430403G16Rik	chr5	-	109678762	109678889	109674544	109677391	109690735	109691041	NA	NA	NA	NA	NA	NA	NA	1	NA	NA	NA	NA	NA	0.866	NA	NA	NA	NA	NA	NA	0.134
5530601H04Rik	chrX	-	105042603	105042817	105038816	105039812	105043129	105043304	0.498667	0.551333	0.654667	0.398667	0.577	0.448667	0.608667	0.244333	0.543333	0.235667	0.529667	0.297333	0.582333	0.271667	0.629333	0.333333	0.592333	0.348	0.523667	0.62	0.419
5530601H04Rik	chrX	-	105042603	105042817	105038816	105039812	105044001	105044111	0.304333	0.211	0.240667	0.199333	0.287	0.208667	0.264	0.106667	0.223	0.100667	0.270333	0.126333	0.219667	0.0696667	0.212333	0.0743333	0.224333	0.0753333	0.247667	0.254667	0.234667
5530601H04Rik	chrX	-	105043124	105043304	105038807	105039812	105044001	105044111	0.402333	0.149	0.254333	0.221667	0.253	0.147667	0.271	0.158333	0.233333	0.188667	0.262	0.240667	0.158667	0.104333	0.138667	0.0786667	0.186667	0.0753333	0.293667	0.19	0.327
5530601H04Rik	chrX	-	105043129	105043304	105038816	105039812	105044001	105044111	0.490333	0.236667	0.311	0.337	0.343333	0.255	0.342	0.269667	0.314333	0.301333	0.358	0.341667	0.245667	0.186	0.211667	0.154	0.256667	0.149333	0.374333	0.272667	0.341
5530601H04Rik	chrX	-	105043129	105043304	105042658	105042817	105044001	105044111	0.912333	0.892333	0.904667	0.930333	0.879667	0.790667	0.913667	0.902333	0.874333	0.910333	0.875667	0.903333	0.866667	0.849333	0.873	0.936333	0.904	0.875333	0.877	0.871667	0.145667
5530601H04Rik	chrX	-	105047908	105048010	105037196	105039812	105066758	105066877	0.894333	0.907333	0.855667	0.755333	0.895333	0.867333	0.923667	0.920333	0.866667	0.912	0.931333	0.91	0.834667	0.759333	0.813333	0.779333	0.795	0.732667	0.965333	0.871667	0.232667
5530601H04Rik	chrX	-	105047908	105048010	105044001	105044111	105066758	105066877	0.507333	0.435667	0.448	0.397333	0.502333	0.377333	0.577	0.485	0.537	0.51	0.526667	0.479667	0.534667	0.451	0.527	0.416667	0.497333	0.422333	0.623333	0.540333	0.246
5530601H04Rik	chrX	-	105069610	105069699	105068463	105068628	105069999	105070087	0.754667	0.723333	0.839667	0.784667	0.798	0.718	0.837	0.879	0.860333	0.853667	0.823	0.865333	0.860667	0.783	0.782333	0.749667	0.803667	0.801	0.844	0.836	0.161
5530601H04Rik	chrX	-	105078018	105078151	105075685	105075859	105079334	105079413	NA	NA	NA	NA	NA	NA	NA	NA	1	NA	NA	1	1	1	0.775333	NA	1	0.775333	NA	NA	0.224667
5530601H04Rik	chrX	-	105078018	105078151	105075685	105075859	105079345	105079609	1	NA	NA	NA	NA	NA	1	0.666667	NA	1	NA	1	0.957333	0.733333	1	NA	1	1	0.886667	0.902667	0.333333
5730420D15Rik	chr10	+	95422854	95422995	95421563	95421675	95428137	95428640	0.646333	NA	NA	NA	NA	NA	NA	NA	NA	NA	NA	NA	NA	NA	NA	0.396667	NA	NA	0.357667	0.307667	0.338667
5730422E09Rik	chr5	-	149127373	149128781	149119564	149119829	149184037	149184063	NA	NA	NA	NA	NA	NA	1	NA	NA	NA	NA	NA	0.844333	NA	NA	NA	NA	NA	NA	NA	0.155667
5730455P16Rik	chr11	-	80368527	80368592	80364835	80364939	80370330	80370450	0.986	0.884	0.989	0.946667	0.957333	0.961333	0.947	0.963333	0.926667	0.933667	0.941333	0.932333	0.965667	0.980667	0.941333	0.956	0.990667	0.978333	0.917667	0.956	0.106667
5730480H06Rik	chr5	+	48377074	48377165	48375542	48375610	48379329	48379464	0.897	0.899667	0.874	0.849667	0.888667	0.857333	0.800333	0.854667	0.786	0.827333	0.815667	0.841667	0.848667	0.909	0.86	0.851667	0.871667	0.919	0.823	0.866667	0.133
5730480H06Rik	chr5	+	48379329	48379464	48374383	48374538	48381786	48381867	NA	1	NA	1	1	0.856333	NA	NA	NA	NA	NA	1	NA	NA	NA	NA	NA	NA	NA	NA	0.143667
5730480H06Rik	chr5	+	48380123	48380231	48379329	48379464	48381786	48381867	0.862333	0.868333	0.830333	0.834333	0.855667	0.938333	0.868333	0.912	0.879333	0.896	0.911333	0.886667	0.813	0.886	0.82	0.858333	0.799	0.861	0.913333	0.933	0.139333
5830417I10Rik	chr3	+	88795463	88795487	88789357	88789398	88799614	88799718	0.453667	0.517667	0.45	0.424667	0.435	0.345333	0.516	0.427	0.51	0.533	0.527333	0.529333	0.452667	0.368667	0.436333	0.355333	0.397667	0.349667	0.522	0.450333	0.187667
5830418P13Rik	chr9	+	103427149	103427386	103426576	103426815	103427688	103427787	NA	NA	0.902333	NA	NA	NA	1	NA	0.588667	NA	1	NA	NA	NA	NA	NA	NA	NA	NA	1	0.411333
5930412G12Rik	chr5	-	128582714	128582987	128579105	128579285	128584163	128584296	0.323333	0.287667	NA	NA	NA	NA	NA	NA	NA	NA	0.235	NA	0.332333	NA	0.314667	NA	0.338667	0.449	NA	NA	0.214
5930412G12Rik	chr5	-	128582714	128582987	128579105	128579285	128585271	128585350	NA	NA	NA	NA	NA	NA	NA	NA	NA	NA	0.0936667	NA	0.140667	NA	0.132	NA	0.118	0.231	NA	NA	0.137333
5930412G12Rik	chr5	-	128582714	128582987	128579127	128579285	128584163	128584296	0.323333	0.287667	0.289667	0.328667	0.263333	0.314667	0.246333	0.391667	0.247333	0.298333	0.235	0.409667	0.332333	0.494333	0.314667	0.461	NA	0.449	0.407	0.375333	0.259333
5930412G12Rik	chr5	-	128582714	128582987	128579127	128579285	128585271	128585350	0.108667	0.064	0.0623333	0.217667	0.0943333	0.291	0.150667	0.206667	0.106333	0.243667	0.0936667	0.258667	0.140667	0.226	0.132	0.260667	NA	0.231	0.166	0.089	0.228667
5930412G12Rik	chr5	-	128584163	128584296	128579177	128579285	128585271	128585406	0.276667	0.336333	0.354333	0.501	0.414667	0.557333	0.510333	0.588	0.442667	0.628	0.467	0.605333	0.376667	0.446667	0.358667	0.455667	0.355333	0.464667	0.470333	0.324333	0.351333
5930412G12Rik	chr5	-	128584163	128584296	128582714	128582987	128585271	128585406	1	1	0.986333	0.907667	0.937667	0.822	0.917	0.980667	0.957	0.961333	0.950667	0.966333	0.914667	0.955667	0.955333	0.914667	0.963667	0.942333	0.978	0.974	0.178
5930412G12Rik	chr5	-	128594207	128594910	128585271	128585406	128600536	128600693	0.07	0.188	0.076	0.167333	0.086	0.11	0.138333	0.156	0.0936667	0.145667	0.0976667	0.155333	0.0926667	0.119333	0.0933333	0.111667	0.0953333	0.132333	0.222667	0.134	0.152667
6030443J06Rik	chr5	+	22553758	22553837	22550436	22550472	22582402	22582482	0.903333	NA	NA	1	1	NA	0.928667	0.949	0.970667	1	1	0.894	1	0.840333	1	0.967333	0.967333	0.911333	0.890333	1	0.159667
6030443J06Rik	chr5	+	22663671	22663730	22582402	22582482	22690706	22690776	NA	NA	NA	NA	NA	NA	NA	NA	NA	NA	0	0.666667	NA	NA	NA	NA	NA	NA	NA	NA	0.666667
6030443J06Rik	chr5	+	22663671	22663730	22582402	22582482	22694679	22694890	NA	NA	NA	NA	0	NA	0.135	0.0846667	0	0	0.0693333	0.034	0	0	0	0.0293333	NA	0	0	NA	0.135
6030443J06Rik	chr5	+	22690706	22690776	22582402	22582482	22694679	22694890	NA	NA	NA	NA	NA	NA	0.181333	0.162667	0	0.081	0.094	0.046	0.068	0.180667	0.137667	0.072	0.375	0.0833333	0.0323333	NA	0.375
6230400D17Rik	chr14	-	20688764	20688839	20687235	20688613	20702911	20703012	0.583333	0.496	0.401667	0.498667	0.389333	0.399667	0.414	0.315	0.362	0.213667	0.413	0.432	0.422	0.402333	0.285	0.454333	0.432	0.476	0.171	0.322667	0.412333
6330408A02Rik	chr7	-	13269334	13269647	13258966	13261640	13277145	13278144	0.936	0.964667	0.974667	0.878333	0.851333	1	0.798	0.868	0.880333	0.872333	0.830667	0.835333	0.922667	0.963	0.935667	0.909	0.920667	0.958667	0.825333	0.849	0.202
6330408A02Rik	chr7	-	13269533	13269647	13258966	13261640	13277145	13277428	0.955	0.96	0.982667	0.907667	0.886333	1	0.821	0.872667	0.902333	0.875333	0.851667	0.848667	0.935	0.967	0.948333	0.926667	0.931	0.969	0.853333	0.867333	0.179
6330549D23Rik	chr3	-	96624526	96624630	96606658	96609419	96629457	96629820	1	NA	NA	1	NA	NA	1	1	0.840667	NA	1	0.738	0.784333	1	1	1	1	NA	0.922	0.732667	0.267333
6430531B16Rik	chr7	-	139976040	139976128	139975861	139975958	139976474	139976673	0.846667	NA	1	NA	0.633667	NA	0.427	NA	0.915333	1	0.507333	NA	NA	NA	NA	NA	0.742333	NA	NA	NA	0.573
6430531B16Rik	chr7	-	139976053	139976128	139975496	139975958	139976474	139976673	0.795	NA	NA	NA	0.643	NA	0.333333	NA	NA	NA	0.146	NA	NA	NA	NA	NA	0.746	NA	NA	NA	0.649
6430531B16Rik	chr7	-	139977071	139977222	139976474	139976673	139978033	139978145	0.92	NA	1	1	0.959667	NA	NA	1	1	0.801667	0.910333	1	1	1	NA	1	1	NA	0.951667	0.928	0.198333
6430531B16Rik	chr7	-	139977071	139977222	139976474	139976673	139978546	139978723	NA	NA	0.798333	1	NA	NA	0.858667	0.645333	0.754	NA	NA	0.858667	1	1	0.858667	1	0.629333	NA	NA	NA	0.370667
6430531B16Rik	chr7	-	139977071	139977222	139976474	139976673	139978546	139978755	0.725	NA	0.798333	NA	1	NA	0.858667	0.645333	0.754	1	NA	0.858667	1	1	NA	NA	0.629333	NA	0.625	0.939667	0.375
6430531B16Rik	chr7	-	139978033	139978145	139976474	139976673	139978546	139978719	0.480667	NA	0.448333	NA	NA	NA	NA	NA	0.333333	NA	NA	NA	NA	NA	NA	NA	NA	NA	0.184667	NA	0.296
6430531B16Rik	chr7	-	139978033	139978145	139977071	139977222	139978546	139978719	0.619333	NA	0.535	0.319333	0.638	NA	0.333333	NA	NA	NA	0.837667	NA	NA	0.333333	NA	NA	NA	0.666667	0.391333	0.319333	0.518333
6430548M08Rik	chr8	+	120157467	120157497	120156296	120156374	120159958	120160039	0.179	0	NA	0	0	0.205667	0	0	NA	NA	NA	0	0.0956667	0	NA	NA	0	NA	0.296	0.398	0.398
6430550D23Rik	chr2	-	155994565	155994863	155988993	155989599	156002436	156002559	0.666667	NA	NA	NA	NA	NA	NA	1	1	NA	NA	NA	1	NA	NA	NA	NA	NA	NA	NA	0.333333
6430550D23Rik	chr2	-	156003680	156003848	156003324	156003485	156007879	156007919	NA	NA	NA	NA	NA	NA	NA	0.666667	0.563	0.433	0.666667	0.563	NA	NA	NA	0.230667	0.730667	NA	0.666667	0.560333	0.5
6430550D23Rik	chr2	-	156003680	156003985	156003324	156003485	156007879	156007977	NA	NA	NA	NA	NA	NA	NA	0.666667	0.509667	0.456	0.666667	NA	NA	NA	0.408333	0.215333	0.668	NA	0.666667	0.556667	0.452667
6430571L13Rik	chr9	+	107341310	107341417	107340601	107340788	107342206	107342589	NA	1	1	0.872667	NA	NA	1	0.974	0.811667	1	1	1	NA	1	1	1	1	0.934	1	NA	0.188333
6430573F11Rik	chr8	+	36498326	36498481	36489043	36489245	36511572	36511591	1	1	0.983333	1	0.979	1	0.974	0.943667	0.963	1	0.917333	1	0.922667	0.984	0.935	0.933667	0.895333	0.935667	0.985333	0.861	0.139
6430573F11Rik	chr8	+	36505551	36505725	36489043	36489245	36511572	36516570	NA	NA	0.973333	1	0.961	NA	0.939667	NA	0.919333	1	0.863	1	0.895333	0.940333	0.885667	NA	0.875	NA	NA	0.779333	0.220667
6430573F11Rik	chr8	+	36505551	36505725	36498326	36498481	36511572	36513013	0.971	1	0.988667	NA	0.958	0.837	0.942333	0.947333	NA	1	NA	1	NA	0.780333	0.866333	0.931	0.916667	0.897333	1	0.955667	0.219667
6430573F11Rik	chr8	+	36505551	36505725	36498326	36498481	36511572	36516570	NA	NA	0.988667	1	0.958	0.837	0.942333	NA	0.938	1	0.943	1	0.887667	0.780333	0.866333	NA	0.916667	NA	NA	0.955667	0.219667
6430573F11Rik	chr8	+	36508324	36508412	36489043	36489245	36511572	36512956	NA	NA	NA	NA	NA	NA	NA	NA	NA	NA	NA	NA	0.721333	NA	NA	NA	NA	NA	NA	0.169333	0.552
6430573F11Rik	chr8	+	36508324	36508412	36498326	36498481	36511572	36512956	NA	NA	NA	NA	NA	NA	NA	NA	0.563	NA	NA	NA	0.634	NA	0.533667	0.456667	0.603	NA	NA	NA	0.177333
6430573F11Rik	chr8	+	36508324	36508412	36505551	36505725	36511572	36512956	0.0196667	0.013	0.0166667	0	0.0193333	0.0143333	0.0803333	0.0403333	0.0816667	0.011	0.019	0	0.203333	0.017	0.0413333	0.03	0.0986667	0.015	0.017	0.00966667	0.203333
6530437J22Rik	chr7	+	44973698	44973771	44973044	44973154	44974074	44974303	0.591333	NA	0.795667	0.919667	NA	NA	NA	0.677	0.698333	0.852667	0.586333	0.795667	0.795667	0.260667	0.819	0.464667	0.373	0.648333	0.519333	0.715333	0.659
6820408C15Rik	chr2	+	152439609	152439709	152437484	152437643	152440764	152440922	0.368	0.666667	NA	NA	0.683667	0.405667	0.571333	0.263667	NA	0.452333	0.604	NA	NA	0.541667	0.217	0.238	0.785667	0.573333	NA	0.525667	0.568667
6820408C15Rik	chr2	+	152442373	152442492	152441215	152441302	152444072	152444330	1	NA	0.647	1	1	NA	1	1	1	NA	0.704667	1	NA	0.890667	NA	1	0.715333	NA	NA	NA	0.353
6820431F20Rik	chr8	-	20274122	20274242	20268285	20272219	20277871	20278170	1	0.723	0.963667	0.986667	1	0.946	0.957667	0.979	1	1	1	0.96	0.970333	1	1	1	0.961333	0.966333	1	1	0.277
8030462N17Rik	chr18	-	77653128	77653296	77633280	77635328	77673899	77674684	0.910333	0.979	NA	NA	1	0.944333	0.917333	0.968	NA	1	0.860667	0.968	NA	0.968	NA	NA	NA	NA	0.963333	NA	0.139333
8030462N17Rik	chr18	-	77653128	77653296	77643067	77643194	77673899	77674684	0.148667	0.129	0.166333	0.205333	0.165333	0.24	0.123333	0.207	0.181667	0.187333	0.152333	0.133	0.186	0.160667	0.2	0.206667	0.167333	0.215667	0.148	0.169333	0.116667
8030474K03Rik	chrX	+	101798101	101798156	101797715	101797761	101798341	101798383	NA	NA	NA	NA	NA	NA	NA	NA	NA	1	NA	NA	NA	NA	NA	0.803333	NA	NA	NA	NA	0.196667
8430423G03Rik	chr5	+	148950659	148950833	148950249	148950388	148951332	148951658	NA	NA	NA	NA	NA	NA	NA	1	NA	NA	NA	NA	NA	0.837	NA	1	NA	1	NA	NA	0.163
8430429K09Rik	chr11	+	3452643	3452740	3452479	3452570	3456762	3457016	0.392	0.778333	0.408	0.354333	0.458	0.667333	0.409333	0.452333	0.456	0.444333	0.448	0.467333	0.372667	0.317333	0.388333	0.392333	0.281	0.514333	0.370667	0.408	0.497333
8430436N08Rik	chr4	+	7564642	7564694	7560687	7560822	7572911	7573801	NA	NA	NA	NA	NA	NA	NA	0.333333	NA	NA	NA	0.717667	NA	0.313667	NA	0.699667	NA	NA	NA	NA	0.404
9030407P20Rik	chr7	-	120676407	120676656	120673435	120675276	120677300	120677520	0.019	0	0.0253333	0.00766667	0.046	0	0.0656667	0.0253333	0.131333	0.0663333	0.0633333	0.0256667	0.074	0.118	0.200333	0.093	0.129	0.0653333	0.00533333	0.034	0.200333
9030617O03Rik	chr12	+	100786137	100786246	100779077	100779310	100829598	100829725	NA	NA	NA	NA	NA	NA	NA	0	NA	NA	NA	NA	0	0.0196667	NA	0.0253333	NA	0.0393333	NA	0.114	0.114
9030617O03Rik	chr12	+	100856920	100857069	100850112	100850373	100859532	100859652	NA	NA	NA	NA	NA	NA	NA	0.898333	NA	NA	NA	NA	NA	1	NA	0.973	NA	NA	NA	0.96	0.101667
9030622O22Rik	chr2	-	147962031	147962064	147947124	147947208	147962633	147962707	NA	NA	0.661667	NA	NA	NA	NA	NA	0.901333	NA	NA	NA	NA	NA	NA	NA	NA	NA	NA	NA	0.239667
9030622O22Rik	chr2	-	147962633	147962707	147947124	147947208	147967241	147967271	NA	NA	0.570667	NA	NA	NA	NA	NA	0.95	NA	NA	NA	NA	NA	NA	NA	NA	NA	NA	NA	0.379333
9030624G23Rik	chr12	-	24074358	24074419	24044700	24044854	24096842	24096968	0.715333	NA	0.473	NA	0.800667	NA	0.626333	0.728667	0.917333	0.704667	0.747	0.596	NA	0.933667	NA	NA	0.656667	NA	0.343333	NA	0.590333
9030624G23Rik	chr12	-	24074621	24074748	24044700	24044854	24096842	24096968	NA	0.969333	NA	NA	NA	NA	0.932	0.877	NA	0.847333	NA	0.811	NA	0.986	NA	NA	NA	NA	0.894333	NA	0.175
9130024F11Rik	chr1	+	57004153	57004290	56971479	56971771	57040332	57040451	NA	NA	NA	NA	NA	NA	NA	NA	NA	NA	NA	NA	NA	0.666667	NA	1	NA	NA	NA	NA	0.333333
9130227L01Rik	chr1	+	55970514	55970652	55960913	55961162	55971079	55972328	NA	NA	NA	0.913333	NA	0.702	NA	0.862667	NA	1	NA	1	NA	1	NA	NA	NA	NA	NA	NA	0.298
9130401M01Rik	chr15	-	58031983	58032148	58028811	58029044	58034083	58034190	0.0743333	NA	NA	NA	NA	NA	0	0	0.487667	0.042	NA	NA	0	NA	0.100333	NA	NA	0.121667	0.196333	NA	0.487667
9230102O04Rik	chr2	-	9883750	9883795	9883040	9883326	9887590	9887667	NA	NA	NA	NA	0.666667	NA	NA	0.423	NA	NA	NA	NA	NA	0.602333	NA	NA	NA	NA	0.562667	0.666667	0.243667
9230110C19Rik	chr9	-	8023899	8023966	8021671	8022544	8025961	8026134	0.696667	0.709333	0.7	0.712667	0.800333	0.719667	0.716	0.698333	0.746333	0.669333	0.702	0.695	0.813667	0.726667	0.822333	0.684333	0.798333	0.689333	0.706333	0.799	0.153
9230110C19Rik	chr9	-	8023899	8023966	8021671	8022544	8037459	8037535	0.974667	0.966333	0.975	0.872333	0.996	0.945333	0.966333	0.918333	0.962333	0.975	0.907667	0.927667	0.955333	0.993333	0.962667	0.960333	0.983667	0.972	0.991667	0.974333	0.123667
9230110C19Rik	chr9	-	8025961	8026134	8021671	8022544	8037459	8037535	0.938	0.889333	0.934333	0.706333	0.975333	0.878333	0.905667	0.822667	0.916	0.952	0.838333	0.861667	0.791	0.978	0.840333	0.902667	0.887333	0.929	0.980333	0.903333	0.274
9230110C19Rik	chr9	-	8025961	8026134	8023899	8023966	8037459	8037535	0.991	0.835667	0.979	0.945667	0.966667	1	0.945667	0.991333	0.986667	0.990667	0.961333	0.980667	0.952667	0.987	1	0.983667	0.984667	0.984	0.96	0.981333	0.164333
9230114K14Rik	chr5	+	52192917	52192978	52190671	52190937	52194800	52194890	0.909667	NA	1	0.909667	0.960333	1	0.78	0.815333	0.950333	0.765	0.947667	0.947667	0.941667	0.952667	1	0.968	0.907	0.960333	0.889333	0.876	0.235
9230114K14Rik	chr5	+	52192917	52193596	52190678	52190937	52194800	52194890	0.851333	NA	1	0.889667	0.915667	1	0.647667	0.762667	0.914	0.746	0.915667	0.904333	0.871667	0.904333	1	0.927	0.808333	0.939333	0.840333	0.814333	0.352333
9230114K14Rik	chr5	+	52192917	52193596	52190678	52190937	52196892	52197984	NA	NA	NA	NA	1	NA	0.784	NA	1	NA	0.568667	0.869667	0.812333	1	0.924667	NA	1	0.877	NA	0.697333	0.431333
9230114K14Rik	chr5	+	52196892	52197023	52190678	52190937	52212042	52212152	0.666667	NA	NA	NA	NA	NA	1	NA	NA	NA	NA	NA	1	NA	0.666667	NA	1	NA	NA	NA	0.333333
9230114K14Rik	chr5	+	52212042	52212152	52196892	52197023	52245676	52245896	NA	NA	NA	NA	NA	NA	NA	NA	NA	NA	NA	1	NA	1	NA	NA	1	0.666667	NA	NA	0.333333
9330179D12Rik	chr6	+	127185368	127185574	127149388	127149563	127211499	127212119	NA	NA	NA	1	NA	NA	0.81	0.867333	1	0.666667	0.597333	0.834	1	0.787333	NA	0.562333	NA	0.619667	1	0.947	0.437667
9330182L06Rik	chr5	+	9380277	9380398	9266129	9266456	9399180	9399376	0.953	1	NA	1	1	0.666667	0.912	0.814667	1	0.906	1	0.949333	NA	0.914667	NA	0.896	1	0.833333	0.654667	0.824333	0.345333
9430015G10Rik	chr4	+	156121932	156122028	156119163	156119239	156122350	156122416	0.853333	0.851333	0.897667	0.881	0.861667	0.855667	0.878667	0.823	0.872667	0.809667	0.838	0.79	0.859333	0.853333	0.816	0.844	0.887333	0.773667	0.818	0.832333	0.124
9430015G10Rik	chr4	+	156123975	156124001	156123534	156123669	156125416	156127263	0.956	0.986333	0.961667	0.915333	0.981	0.878333	0.941	0.907	0.946333	0.954667	0.981	0.976	NA	NA	NA	NA	0.971333	NA	NA	NA	0.108
9430015G10Rik	chr4	+	156123975	156124001	156123534	156123669	156125416	156127265	0.956	0.986333	0.961667	NA	NA	0.878333	0.941	0.907	0.946333	0.954667	NA	0.976	1	0.956333	0.989333	0.926667	0.971333	0.943667	0.965333	0.993	0.121667
9430015G10Rik	chr4	+	156124091	156124122	156123534	156123669	156125416	156127263	0.935333	0.967333	0.935667	0.893	0.966667	0.878333	0.943	0.903667	0.947	0.964	0.972333	0.978333	1	0.942	0.986333	0.931	0.971667	0.892333	0.949667	0.992	0.121667
9430021M05Rik	chr2	+	162665808	162666024	162661162	162661426	162666388	162667109	NA	NA	0.756	NA	NA	NA	NA	NA	NA	NA	NA	NA	NA	NA	NA	NA	NA	NA	0.434	0.299333	0.456667
9430038I01Rik	chr7	-	137376954	137377117	137376136	137376351	137387370	137387433	0.0666667	0.0853333	0.095	0.053	0.0903333	0.0353333	0.169	0.174667	0.133333	0.143	0.108333	0.150667	0.124	0.164667	0.143	0.150667	0.101333	0.148667	0.102333	0.112333	0.139333
9430038I01Rik	chr7	-	137376954	137377117	137376136	137376351	137410639	137410735	0.223333	0.292333	0.310667	0.172667	0.242333	0.139333	0.315333	0.453667	0.222333	0.382667	0.246333	0.261	0.372667	0.373667	0.349333	0.310333	0.228333	0.354333	0.189	0.251667	0.314333
9430038I01Rik	chr7	-	137387539	137387701	137375573	137376351	137410639	137410762	0.653	0.669667	0.673	0.693667	0.664	0.613	0.697667	0.812	0.72	0.736333	0.709333	0.649333	0.705667	0.724333	0.689667	0.685	0.638	0.687333	0.683667	0.679	0.199
9430076C15Rik	chr6	+	53369786	53369858	53287317	53287373	53375938	53376032	NA	NA	NA	0.905667	NA	NA	NA	NA	NA	0.92	NA	0.906333	NA	0.666667	1	1	NA	NA	0.666667	NA	0.333333
9430076C15Rik	chr6	+	53387997	53388088	53375938	53376032	53388784	53388825	NA	NA	NA	0.122333	NA	0.0746667	NA	NA	NA	0	NA	0	NA	NA	NA	NA	NA	NA	NA	NA	0.122333
9430091E24Rik	chr8	-	111137442	111137552	111128885	111129786	111145403	111145459	1	0.838333	0.724667	0.909	1	NA	0.920333	NA	0.883667	0.697333	0.97	0.942333	0.782333	0.909	0.698333	0.668333	0.743	0.947333	0.882	1	0.331667
9430091E24Rik	chr8	-	111143601	111143724	111137442	111137552	111145403	111145480	0	NA	NA	NA	NA	NA	NA	0.400333	0.067	NA	0	NA	NA	0.067	0	NA	NA	0	0.0596667	0.0536667	0.400333
9530026P05Rik	chr6	+	92960449	92960601	92940577	92940809	93107066	93107159	0.143	NA	NA	0.103667	NA	NA	NA	0	NA	NA	0.295333	0.404333	0	0.0613333	NA	NA	0.422667	NA	0.272667	0.0966667	0.422667
9530026P05Rik	chr6	+	93192108	93192203	93107066	93107159	93237973	93238044	NA	NA	NA	1	NA	0.906333	NA	NA	NA	NA	0.876667	NA	NA	NA	NA	0.844	1	NA	0.695667	NA	0.304333
9530026P05Rik	chr6	+	93236651	93236906	93192108	93192203	93237973	93238044	NA	NA	NA	NA	NA	NA	NA	NA	NA	NA	NA	NA	NA	NA	NA	0.0826667	NA	NA	0.705333	0.595	0.622667
9530051G07Rik	chrX	+	153038438	153038784	153037628	153037694	153045571	153045664	1	NA	NA	NA	NA	NA	1	NA	NA	NA	NA	NA	1	NA	NA	NA	0.666667	NA	NA	NA	0.333333
9530051G07Rik	chrX	+	153038438	153038784	153037628	153037694	153069006	153072915	1	NA	0.736667	NA	NA	NA	NA	NA	NA	NA	NA	NA	NA	NA	NA	NA	NA	NA	NA	NA	0.263333
9530051G07Rik	chrX	+	153045571	153045664	153038438	153038784	153069006	153072915	0.788	NA	NA	NA	NA	NA	NA	NA	NA	NA	1	NA	NA	NA	NA	NA	NA	NA	NA	NA	0.212
9530062K07Rik	chr6	-	116202169	116202258	116199407	116199909	116207153	116207257	NA	NA	0.822333	1	1	NA	1	NA	1	NA	NA	1	1	NA	NA	NA	0.846333	1	1	NA	0.177667
9530062K07Rik	chr6	-	116202169	116202258	116199407	116199909	116207901	116207993	NA	NA	NA	NA	NA	NA	NA	NA	NA	NA	NA	0.846333	NA	NA	NA	NA	NA	1	NA	NA	0.153667
9530077C05Rik	chr9	+	22424112	22424807	22411576	22411749	22430355	22430499	0.920667	1	1	1	0.882333	1	1	0.938667	1	0.930667	1	1	1	1	1	1	0.710667	1	0.903	1	0.289333
9530077C05Rik	chr9	+	22424112	22424807	22411576	22411749	22431675	22431808	NA	NA	NA	NA	NA	NA	NA	1	NA	0.414	NA	NA	NA	NA	NA	NA	NA	NA	NA	NA	0.586
9530077C05Rik	chr9	+	22424112	22424807	22411576	22411749	22435094	22435400	1	NA	0.666667	0.744667	0.666667	0.676667	0.826	0.642667	1	1	NA	0.519	NA	0.511333	NA	0.457	1	0.525	0.676333	0.834667	0.543
9530077C05Rik	chr9	+	22430355	22430499	22411576	22411749	22431675	22431808	NA	NA	NA	1	NA	NA	NA	1	1	0.837	NA	1	NA	NA	NA	1	NA	NA	NA	NA	0.163
9530077C05Rik	chr9	+	22431675	22431808	22411576	22411749	22435094	22435400	NA	NA	NA	0.952667	NA	NA	NA	0.917667	NA	1	NA	0.787667	NA	NA	NA	0.803333	NA	NA	NA	NA	0.212333
9530077C05Rik	chr9	+	22431675	22431808	22424112	22424807	22435094	22435400	0.784333	NA	NA	NA	NA	NA	1	1	NA	NA	NA	NA	NA	0.861667	NA	NA	NA	NA	0.898333	0.977	0.215667
9530077C05Rik	chr9	+	22439866	22439964	22435094	22435400	22444071	22444677	NA	1	NA	1	1	0.909	NA	NA	1	1	NA	1	1	1	0.843	0.974	1	1	1	0.966667	0.157
9530082P21Rik	chr17	+	23745773	23746049	23743233	23743421	23746298	23746406	1	NA	NA	NA	NA	NA	1	NA	NA	NA	NA	NA	NA	NA	NA	NA	NA	NA	0.827667	1	0.172333
9930012K11Rik	chr14	-	70156160	70156276	70155849	70155953	70156415	70156518	0.973	1	0.941	1	0.988667	1	0.955667	0.963333	0.986	1	0.944333	0.978667	0.889667	0.984667	0.966	0.970667	0.907333	0.983333	1	0.975	0.110333
9930021J03Rik	chr19	-	29729831	29729959	29720721	29720773	29735115	29735205	0.797667	NA	0.81	NA	0.744	NA	0.892333	0.65	0.72	0.576667	0.676	0.626	0.716333	0.717667	0.883	0.851667	0.559667	0.804333	0.658333	0.806	0.332667
9930021J03Rik	chr19	-	29729831	29729959	29720721	29720773	29743532	29743612	0.666667	NA	NA	NA	NA	NA	0.333333	NA	NA	NA	0.165667	NA	NA	NA	NA	0.333333	NA	NA	NA	NA	0.501
9930021J03Rik	chr19	-	29729831	29729959	29723389	29723505	29743532	29743612	0.514	NA	0.614333	0.531	0.690667	0.615	0.699667	0.492333	0.511	0.563	0.599667	0.384333	0.549333	0.521	NA	0.493333	NA	0.368	0.554333	0.53	0.331667
9930021J03Rik	chr19	-	29735115	29735205	29720721	29720773	29753599	29755017	1	NA	NA	1	1	NA	NA	0.789333	0.736	0.899667	0.899667	0.899667	0.89	1	NA	0.620333	0.840667	0.759667	1	0.846	0.379667
9930021J03Rik	chr19	-	29735115	29735205	29720721	29720773	29786248	29786449	NA	NA	NA	NA	NA	NA	NA	NA	NA	1	1	NA	1	1	NA	0.666667	0.878667	NA	NA	NA	0.333333
9930021J03Rik	chr19	-	29735115	29735205	29720721	29720773	29805281	29805989	NA	NA	NA	1	1	0.666667	NA	1	NA	0.611333	NA	0.899667	1	0.822	NA	NA	0.846	NA	NA	NA	0.388667
9930021J03Rik	chr19	-	29743532	29743612	29720585	29720773	29786248	29786449	NA	NA	NA	NA	NA	NA	NA	NA	NA	NA	1	NA	NA	NA	1	NA	0.793	1	NA	NA	0.207
9930021J03Rik	chr19	-	29743532	29743612	29723389	29723505	29805281	29805989	1	NA	NA	1	NA	NA	1	0.943333	NA	1	1	0.849667	1	0.675333	NA	NA	NA	1	0.806	0.917667	0.324667
9930021J03Rik	chr19	-	29753599	29755017	29720585	29720773	29786248	29786449	NA	NA	NA	NA	NA	NA	NA	NA	NA	1	1	NA	1	1	1	0.944	0.891333	1	NA	NA	0.108667
9930021J03Rik	chr19	-	29753599	29755017	29720585	29720773	29805281	29805989	1	NA	0.898	1	NA	0.683667	NA	1	1	0.623333	1	0.898	1	0.781667	1	0.905	0.889667	0.794333	NA	1	0.376667
9930021J03Rik	chr19	-	29753599	29755017	29723389	29723505	29805281	29805989	1	NA	0.752	1	1	1	1	0.905	1	1	1	0.898	1	0.733333	1	0.762667	NA	1	0.828	0.843667	0.266667
9930021J03Rik	chr19	-	29753599	29755017	29735115	29735205	29786248	29786449	1	NA	0.852333	1	1	NA	1	1	1	1	1	NA	0.849	0.955333	1	0.936	0.895333	1	NA	1	0.151
9930021J03Rik	chr19	-	29753599	29755017	29735115	29735205	29805281	29805989	1	NA	1	0.82	0.677	1	0.918333	0.843667	0.911333	1	1	1	0.898	1	1	0.854667	1	1	1	1	0.323
9930021J03Rik	chr19	-	29753599	29755017	29743532	29743612	29786248	29786449	0.739333	0.767333	0.838	0.767	0.921333	0.984333	0.883667	0.843333	0.764333	0.884	0.897667	0.882	0.771667	0.837	0.815	0.751	0.796	0.789333	0.875333	0.792667	0.245
9930021J03Rik	chr19	-	29753599	29755017	29743532	29743612	29805281	29805989	1	1	1	0.955667	NA	1	0.942	0.943667	1	0.931333	1	0.890333	0.983333	0.951667	1	1	1	0.974667	0.976	0.975333	0.109667
9930021J03Rik	chr19	-	29786248	29786449	29753599	29755017	29805281	29805507	0.660667	0.836333	0.691333	0.554	0.678333	0.688333	0.682667	0.603	0.658	0.644667	0.641333	0.655333	0.576667	0.685	0.728	0.631333	0.677	0.625333	0.582333	0.822	0.282333
A230046K03Rik	chr10	+	83581256	83581391	83580256	83580361	83583254	83583363	0.991333	1	0.968	0.980333	0.953333	0.979	0.966667	0.963667	0.965	0.965	0.970333	0.965333	0.991	0.865667	0.957333	0.921667	0.972333	0.911667	0.975333	0.971333	0.134333
A230056P14Rik	chr7	+	55976579	55976667	55975691	55975830	55976763	55976984	0.92	NA	0.967	0.892333	1	0.971667	0.911	0.91	0.903	0.942333	0.877333	0.888333	0.961333	0.956333	0.964667	0.878333	0.939667	0.992667	0.921667	0.918667	0.122667
A230056P14Rik	chr7	+	55976763	55976984	55975691	55975830	55979430	55980868	0.945	0.952667	0.970333	1	0.828333	1	1	1	0.976667	0.988667	0.975667	0.960333	0.964	0.936333	0.982667	0.973333	1	1	0.976	0.992667	0.171667
A230087F16Rik	chr12	+	111292113	111292204	111284783	111285304	111292502	111293988	NA	NA	0.666667	NA	NA	NA	NA	NA	1	NA	NA	NA	NA	NA	NA	NA	NA	NA	NA	NA	0.333333
A2m	chr6	+	121659919	121660148	121659286	121659413	121660842	121660969	NA	NA	NA	0.966	1	0.899	NA	NA	NA	1	NA	1	NA	NA	NA	NA	NA	NA	NA	NA	0.101
A2m	chr6	+	121669935	121670010	121669511	121669668	121670901	121671082	NA	1	NA	0.666667	NA	1	NA	NA	NA	1	NA	1	NA	1	NA	1	NA	0.919333	NA	NA	0.333333
A330074K22Rik	chr8	-	120224524	120224655	120204433	120206485	120227924	120228230	NA	NA	1	0.864667	NA	1	NA	1	1	0.983333	NA	1	NA	NA	NA	1	NA	NA	NA	NA	0.135333
A330076H08Rik	chr7	-	61931347	61931493	61930136	61930493	61945130	61945241	NA	NA	NA	0.772	NA	1	NA	0.891667	0.671333	1	1	1	1	1	0.666667	0.899333	1	0.949	NA	0.935333	0.333333
A330102I10Rik	chr13	+	29016709	29016879	29016292	29016391	29023175	29023212	1	NA	NA	1	0.766	1	0.819667	1	0.725	0.666667	0.924	1	1	NA	1	1	0.906	1	0.853333	0.945333	0.333333
A330102I10Rik	chr13	+	29023630	29023723	29023175	29023212	29028421	29028729	NA	NA	0.729	NA	0.511333	NA	0.154	0.116	0.270333	0.332	0.406333	NA	0.0743333	NA	NA	NA	NA	0	0.591667	NA	0.729
A430093F15Rik	chr19	+	10785232	10785345	10755884	10755977	10785417	10785643	NA	NA	1	NA	NA	NA	NA	NA	0.781333	NA	1	NA	NA	NA	1	NA	NA	NA	NA	NA	0.218667
A430093F15Rik	chr19	+	10785232	10785345	10755884	10755977	10785417	10786034	NA	NA	NA	NA	NA	NA	1	NA	0.781333	NA	NA	NA	NA	NA	NA	NA	NA	NA	NA	NA	0.218667
A430105I19Rik	chr2	-	118757838	118757878	118757497	118757756	118758412	118758503	0.898	NA	1	NA	1	NA	NA	NA	NA	NA	NA	1	1	1	NA	1	1	0.898	0.961	0.978333	0.102
A430105I19Rik	chr2	-	118759200	118759256	118758589	118758643	118759507	118759707	0.911333	NA	NA	NA	NA	NA	NA	1	1	1	0.802667	NA	0.86	0.943	1	1	1	1	0.946	1	0.197333
A530021J07Rik	chr7	+	83149103	83149203	83148469	83148700	83155176	83155243	NA	NA	NA	NA	NA	NA	NA	0.944333	NA	0.885	NA	0.857333	NA	0.876	NA	0.788667	NA	NA	NA	NA	0.155667
A530072M11Rik	chr4	+	16172824	16172984	16164109	16164191	16210860	16210910	0.768333	NA	1	NA	1	1	1	1	0.942667	1	1	NA	0.667667	1	1	NA	1	NA	1	NA	0.332333
A530072M11Rik	chr4	+	16241964	16242036	16210860	16210910	16252459	16252569	NA	NA	NA	NA	NA	NA	NA	NA	NA	NA	NA	1	NA	0.796	NA	NA	NA	NA	NA	NA	0.204
A630001G21Rik	chr1	-	85719024	85719129	85717082	85718368	85723097	85723181	1	1	0.937667	0.873333	1	1	0.901667	1	1	0.967333	0.973	0.855333	0.975667	0.87	1	0.953667	0.961333	0.943	NA	1	0.144667
A630001G21Rik	chr1	-	85723097	85723181	85719024	85719129	85736471	85736554	1	NA	1	0.848333	0.942333	1	0.964333	0.901667	1	0.824333	0.909667	1	0.954333	0.962	0.947667	0.875	1	0.900333	1	0.824	0.176
A630001G21Rik	chr1	-	85723097	85723387	85719024	85719129	85736471	85736581	1	NA	NA	NA	0.917	NA	0.939667	0.867	NA	0.770333	NA	1	0.930333	0.936	0.92	0.804333	1	0.861667	1	0.742	0.258
A630001G21Rik	chr1	-	85725120	85725289	85723097	85723387	85726458	85726502	NA	NA	1	NA	NA	NA	NA	1	0.949	1	1	NA	1	0.920333	1	0.866	NA	1	NA	1	0.134
A630001G21Rik	chr1	-	85725120	85725289	85723097	85723387	85736471	85736629	0.666667	NA	NA	NA	NA	NA	1	NA	NA	NA	NA	NA	0.920333	NA	NA	NA	NA	NA	0.766	NA	0.333333
A630001G21Rik	chr1	-	85726458	85726502	85723097	85723181	85736471	85736581	NA	NA	NA	NA	NA	NA	NA	NA	NA	NA	NA	NA	NA	NA	1	NA	0.666667	NA	NA	0.808333	0.333333
A630001G21Rik	chr1	-	85726458	85726615	85723097	85723181	85736471	85736629	1	NA	0.869333	NA	0.769	1	1	NA	NA	1	1	NA	0.953667	1	1	0.926667	0.918667	1	1	0.909	0.231
A630001G21Rik	chr1	-	85726458	85726615	85723097	85723387	85736471	85736629	NA	NA	NA	NA	NA	NA	NA	1	NA	1	NA	NA	0.926667	0.778333	1	0.879667	NA	0.896333	NA	0.896333	0.221667
A630001G21Rik	chr1	-	85727513	85727698	85726613	85726615	85736471	85736561	0.021	NA	0.0996667	0.554667	0.0273333	0	0.101667	0.025	0.021	0.0866667	0.125667	0	0.0283333	0.181333	0.039	0	0.00666667	0.119667	0.0956667	0.0463333	0.554667
A630001G21Rik	chr1	-	85735922	85736029	85727513	85727698	85736471	85736561	NA	NA	NA	NA	NA	NA	NA	NA	NA	0.333333	NA	NA	NA	0	NA	NA	NA	0	NA	NA	0.333333
A730017C20Rik	chr18	+	59065834	59065885	59062461	59062562	59072192	59072417	0.112333	NA	0.0766667	0.0776667	0.0733333	NA	0.0383333	0.147	0.0833333	0.254333	0.0706667	0.304	0.147	0.37	0.117333	0.144333	0.0633333	0.149	0.0766667	0.0733333	0.331667
A730017C20Rik	chr18	+	59065834	59066989	59062509	59062562	59072192	59074664	0.219667	0.768333	0.147	0.203667	0.169	0.365	0.111	0.200667	0.126	0.268667	0.121667	0.235667	0.144	0.342333	0.156667	0.328333	0.153333	0.203	0.110667	0.123	0.657667
A730017C20Rik	chr18	+	59066816	59066989	59062493	59062562	59072192	59072417	0.527667	0.884667	0.423667	NA	0.436667	NA	0.338333	NA	NA	NA	NA	NA	0.397667	0.632	0.424333	NA	0.423667	NA	0.337	0.357	0.547667
A730017C20Rik	chr18	+	59066816	59066989	59065834	59065885	59072192	59072417	0.935333	1	0.88	1	0.897	NA	0.952	0.925333	0.894	0.915667	0.899667	0.888667	0.844	0.878	0.863667	0.933	0.919667	0.836667	0.881	0.914	0.163333
A730017C20Rik	chr18	+	59066909	59066989	59062510	59062562	59072192	59072417	0.631667	0.882333	0.530667	0.473667	0.517	0.5	0.427	0.587667	0.455333	0.574333	0.448333	0.591	0.494	0.696333	0.518333	0.717333	0.507	0.578333	0.414	0.449667	0.468333
A730017C20Rik	chr18	+	59066928	59066989	59062247	59062562	59072192	59072417	0.614667	NA	0.509667	0.477	0.485	NA	NA	NA	0.421667	NA	NA	NA	NA	NA	NA	NA	NA	NA	NA	NA	0.193
A730017C20Rik	chr18	+	59066928	59066989	59065834	59065885	59072192	59072417	0.965667	1	0.917	1	0.946667	NA	0.970667	0.956	0.922667	0.917667	0.927333	0.920333	0.896667	0.936	0.916333	0.956667	0.951333	0.913	0.919667	0.944333	0.103333
A730017L22Rik	chr2	-	130883310	130883428	130879698	130882330	130906210	130906356	0.627333	NA	0.682667	0.689667	0.711667	NA	0.595333	0.532333	0.616333	0.687	0.671	0.741333	0.602	0.554	0.628333	0.613	0.528	0.785333	0.904667	0.611	0.376667
A730017L22Rik	chr2	-	130883828	130883987	130879698	130882330	130906210	130906356	0.751667	0.626	0.738	0.696333	0.808333	NA	0.692667	0.553333	0.663	0.796	0.637	0.843333	0.672333	0.660333	0.767667	0.714667	0.665333	0.849	0.889667	0.755667	0.336333
A730020E08Rik	chr6	-	61179983	61180061	61176020	61177082	61180706	61180810	NA	NA	NA	1	NA	1	NA	1	1	0.883	1	0.937333	NA	NA	NA	1	NA	NA	NA	NA	0.117
A730056A06Rik	chr7	-	73332427	73332505	73316252	73316442	73375516	73375774	1	NA	NA	0.745	NA	NA	NA	0.538667	0.666667	0.692667	NA	0.883	0.666667	1	NA	NA	1	0.906667	0.820333	0.809	0.461333
A730081D07Rik	chr13	-	40958260	40958359	40956413	40957649	40959927	40960148	0.897	NA	NA	NA	1	NA	NA	NA	NA	NA	NA	NA	NA	NA	NA	NA	NA	NA	NA	NA	0.103
A730090N16Rik	chr3	-	65326152	65326383	65324775	65325080	65349005	65349067	0.0633333	NA	0.121667	0.0633333	NA	NA	NA	0.399667	NA	0.557667	NA	0.224333	0.333333	0.119	NA	0.191	NA	0.333333	0.333333	NA	0.494333
A830010M20Rik	chr5	+	107451988	107452185	107445862	107446057	107470707	107470797	NA	NA	1	NA	NA	NA	1	NA	0.853333	1	1	NA	NA	NA	1	NA	NA	NA	NA	NA	0.146667
A830010M20Rik	chr5	+	107461437	107461555	107445862	107446057	107470707	107470797	NA	NA	NA	NA	NA	NA	1	NA	0.830667	NA	NA	NA	NA	NA	NA	NA	NA	NA	NA	NA	0.169333
A830010M20Rik	chr5	+	107461437	107461555	107452155	107452185	107470707	107470797	0.736	0.789667	0.895	0.757333	0.699333	0.862	0.631333	0.786	0.831	0.860667	0.795667	0.773	0.940667	0.714333	1	0.710667	0.806	0.713	0.824333	0.905667	0.368667
A830010M20Rik	chr5	+	107491478	107491581	107490662	107490751	107497720	107497850	NA	NA	0.784667	1	NA	NA	NA	NA	NA	NA	NA	NA	NA	NA	NA	NA	NA	NA	NA	NA	0.215333
A830010M20Rik	chr5	+	107495870	107496053	107490662	107490751	107496735	107496873	NA	0.945	NA	NA	NA	NA	1	0.975333	NA	1	1	1	1	1	NA	1	0.862333	0.974667	1	NA	0.137667
A830018L16Rik	chr1	+	11511917	11512065	11414104	11414637	11518577	11518709	NA	NA	1	NA	NA	1	NA	0.937	0.972333	0.971667	0.827333	0.93	0.942667	0.934667	0.957667	0.907667	NA	0.900333	NA	0.965667	0.172667
A830018L16Rik	chr1	+	11511917	11512065	11414268	11414637	11518577	11518709	0.883333	0.917667	1	1	0.809667	1	0.881	0.937	0.972333	0.971667	0.827333	NA	0.942667	NA	0.957667	0.907667	0.948667	0.900333	0.979333	0.965667	0.190333
A830018L16Rik	chr1	+	11545153	11545282	11518577	11518709	11562962	11562991	1	1	1	1	NA	0.962333	1	0.959667	0.896	0.985	0.836333	0.931667	1	0.990333	0.971667	0.970667	1	0.967667	0.956333	0.951667	0.163667
A830018L16Rik	chr1	+	11562962	11562991	11518577	11518709	11588373	11588546	NA	NA	NA	NA	NA	NA	NA	NA	0.816	NA	1	NA	NA	NA	NA	NA	NA	NA	NA	NA	0.184
A830018L16Rik	chr1	+	11562962	11562991	11518670	11518709	11588373	11588546	NA	NA	NA	NA	NA	NA	NA	1	0.816	1	NA	NA	NA	0.873	NA	1	NA	1	NA	1	0.184
A830018L16Rik	chr1	+	11933543	11933591	11798480	11798566	11950962	11951056	NA	NA	NA	NA	NA	NA	NA	0.806333	NA	1	NA	1	NA	1	NA	0.806333	NA	NA	NA	NA	0.193667
A830018L16Rik	chr1	+	11933543	11933591	11829814	11829891	11950962	11951056	NA	NA	NA	NA	NA	NA	0.561333	0.8	0.53	0.712667	0.755	0.810667	NA	0.717333	NA	0.645	NA	0.592	0.888333	0.712667	0.358333
A830052D11Rik	chr18	-	32371429	32371583	32359056	32359435	32377687	32378284	0.886	0.82	1	0.842	0.791	0.790333	0.848	0.745	0.656667	0.814333	0.930667	0.968	0.594333	0.770667	0.690667	0.623667	0.793667	0.706333	0.899667	0.884333	0.405667
A830080D01Rik	chrX	+	159555474	159555650	159553243	159553894	159558334	159558398	NA	0.902667	0.975	0.859	NA	0.956667	0.98	NA	NA	0.917	NA	0.951333	0.953333	0.926667	0.954667	0.903667	0.988	0.896333	0.965	0.964333	0.129
A930001C03Rik	chr19	+	4447296	4447426	4443741	4443788	4447524	4448183	NA	NA	NA	NA	NA	NA	NA	NA	0.776333	NA	0.333333	NA	NA	NA	0.57	NA	1	NA	1	0.887333	0.666667
A930001C03Rik	chr19	+	4447296	4447426	4444002	4444038	4447524	4448183	NA	NA	NA	NA	NA	NA	NA	NA	0.666667	NA	NA	NA	NA	NA	NA	NA	NA	NA	1	NA	0.333333
A930005H10Rik	chr3	-	115886213	115886375	115881580	115881838	115887775	115888094	0.308333	0.4	0.383	0.460667	0.312333	0.570333	0.296667	0.307667	0.329667	0.276	0.247	0.363333	0.335	0.348	0.306	0.343667	0.347	0.374333	0.306	0.289	0.323333
A930005H10Rik	chr3	-	115886321	115886375	115881785	115881838	115887775	115888104	0.149333	0.246	0.115	0.136667	0.157333	0.157	0.076	0.129	0.057	0.076	0.0613333	0.130333	0.134667	0.278	0.179	0.153667	0.133333	0.196	0.121333	0.108	0.221
A930007I19Rik	chr19	-	29488370	29488583	29486354	29487671	29499811	29500079	NA	NA	1	NA	1	NA	0.896333	1	1	NA	1	NA	1	NA	NA	NA	NA	NA	1	NA	0.103667
A930007I19Rik	chr19	-	29499811	29500079	29488370	29488583	29520773	29520969	NA	NA	NA	NA	NA	1	1	0.796333	0.796333	NA	NA	0.853333	1	1	1	NA	NA	1	1	NA	0.203667
A930012L18Rik	chr18	+	44668794	44668890	44661664	44662282	44672222	44672363	NA	NA	NA	NA	NA	NA	NA	NA	0.74	NA	NA	NA	NA	NA	NA	NA	0.666667	0.876333	NA	0.787	0.209667
AA986860	chr1	+	130737501	130737687	130731975	130732223	130741002	130741183	1	NA	0.963	NA	0.656	0.762333	0.74	1	0.902333	1	0.841667	1	0.894	NA	0.786333	1	1	NA	0.706	0.640667	0.359333
AA986860	chr1	+	130737501	130737687	130731975	130732223	130742328	130744622	NA	NA	NA	NA	NA	NA	1	NA	NA	NA	NA	NA	0.815333	NA	NA	NA	NA	NA	NA	NA	0.184667
AA986860	chr1	+	130741002	130741183	130732109	130732223	130742328	130742463	NA	NA	NA	NA	NA	NA	1	NA	NA	NA	NA	NA	0.882667	1	1	NA	1	NA	NA	1	0.117333
Aaed1	chr13	-	64309092	64309146	64308821	64308927	64312266	64312335	0.919	0.885	0.935667	0.912667	0.924	0.935333	0.931333	0.898333	0.926	0.880333	0.923	0.882333	0.929333	0.848333	0.931	0.875667	0.954	0.844	0.904667	0.928667	0.11
Aagab	chr9	+	63636383	63636483	63619147	63619231	63640206	63641889	NA	NA	NA	NA	NA	NA	NA	NA	0.666667	1	NA	NA	NA	NA	NA	NA	NA	NA	NA	NA	0.333333
Aagab	chr9	+	63639039	63639144	63619147	63619231	63640206	63641889	NA	NA	1	NA	NA	NA	NA	NA	0.784	NA	NA	NA	1	NA	NA	NA	NA	NA	NA	NA	0.216
Aak1	chr6	+	86959031	86959274	86956258	86956572	86963992	86964225	0.613	0.431333	0.516333	0.432667	0.637	0.535	0.682	0.634333	0.69	0.543667	0.614333	0.568667	0.668	0.627333	0.605667	0.517667	0.652	0.605	0.577333	0.601667	0.258667
Aak1	chr6	+	86970990	86971086	86965476	86965634	86995839	86996218	0.843667	NA	NA	NA	NA	1	0.95	0.801	NA	NA	NA	0.843667	NA	NA	NA	NA	NA	NA	0.876333	0.919	0.199
Aak1	chr6	+	86970990	86971086	86967268	86967373	86981295	86981397	0.888	1	0.762667	0.787	0.867	1	0.924	0.665333	0.830333	0.812667	0.744333	0.816333	0.876333	0.762667	NA	NA	0.712	0.697	0.791667	0.928667	0.334667
Aak1	chr6	+	86970990	86971086	86967268	86967373	86982541	86982643	0.201	0.399333	0.411333	0.092	0.146333	0.456	0.297333	0.258333	0.290667	0.202	0.257	0.164333	0.292667	0.177	0.276	NA	0.256333	0.237667	0.378	0.293	0.364
Aak1	chr6	+	86970990	86971086	86967268	86967373	86995839	86996218	0.0646667	0.163667	0.077	0.029	0.092	0.067	0.132667	0.096	0.121	0.0856667	0.087	0.114667	0.0783333	0.0796667	0.0746667	0.0606667	0.132333	0.073	0.113667	0.158667	0.134667
Aak1	chr6	+	86981295	86981397	86967268	86967373	86982541	86982643	0.059	0	0.0596667	0.072	0.0316667	0.0403333	0.048	0.129333	0.0526667	0.117	0.126667	0.0813333	0.033	0.15	0	NA	0.117	0.160333	0.110333	0.204	0.204
Aak1	chr6	+	86981295	86981397	86970990	86971086	86982541	86982643	0.380667	0.333333	0.0516667	0.699667	NA	0.0583333	0.191667	0.288	0.122667	0.475	0.398	0.502667	0.0963333	0.544	NA	NA	0.372667	0.423333	0.207667	0.609333	0.648
Aamdc	chr7	-	97558130	97558226	97550669	97550741	97565150	97565300	0.789	0.785	0.826667	0.845	0.836333	0.852333	0.780333	0.779667	0.760667	0.761667	0.75	0.742333	0.787667	0.843333	0.771667	0.823667	0.821	0.843333	0.749333	0.794	0.11
Aamdc	chr7	-	97558130	97558226	97550669	97550741	97575587	97575691	0.976667	0.978	0.911333	0.974333	0.882667	0.985667	0.942667	0.942333	0.955333	0.919667	0.940333	0.953333	0.934333	0.947333	0.959667	0.928333	0.978	0.955	0.915	0.967333	0.103
Aamdc	chr7	-	97565150	97565300	97550330	97550741	97575587	97575653	0.969667	0.973	0.898333	0.955	0.868	0.973667	0.949	0.94	0.956333	0.918	0.943333	0.961333	0.937667	0.933333	0.965	0.907333	0.97	0.939333	0.916	0.951	0.105667
Aamdc	chr7	-	97565150	97565300	97550330	97550741	97579365	97579497	0.960333	0.971333	1	0.951667	0.936667	0.936333	0.946	0.962333	0.943333	0.941667	0.929333	0.944667	0.901667	0.900333	0.931667	0.925667	0.836	0.933333	0.953	0.877333	0.164
Aamdc	chr7	-	97569686	97569774	97550547	97550741	97575587	97575691	0.768667	NA	0.415667	0.717333	0.289667	0.807667	NA	0.6	0.667	0.449333	0.468333	0.612	0.636667	0.587333	NA	0.4	0.744333	0.528	0.520667	0.705333	0.518
Aamdc	chr7	-	97569686	97569774	97550547	97550741	97579365	97579442	NA	NA	NA	0	0.303333	NA	NA	0.0296667	0	0.201	0.0546667	0.166	0	0	NA	0	0	0.0546667	0.246667	0.0773333	0.303333
Aamdc	chr7	-	97575587	97575691	97550541	97550741	97579365	97579398	0.968	0.978333	1	0.947333	0.951333	0.929333	0.956	0.956	0.952333	0.941333	0.915	0.941333	0.914333	0.924	0.938	0.939	0.883	0.95	0.949333	0.891	0.117
Aamdc	chr7	-	97575587	97575691	97550541	97550741	97579365	97579496	0.968	0.978333	1	NA	NA	0.929333	NA	NA	0.952333	NA	NA	NA	NA	NA	0.938	NA	0.883	NA	NA	NA	0.117
Aamdc	chr7	-	97575587	97575691	97565150	97565300	97579365	97579398	0.586	0.583333	0.593667	0.522	0.619667	0.598	0.637333	0.537333	0.637667	0.588333	0.569667	0.599667	0.623	0.620667	0.623667	0.621667	0.696667	0.642667	0.571333	0.603333	0.174667
Aamdc	chr7	-	97575587	97575691	97565150	97565300	97579365	97579496	0.586	0.583333	0.593667	NA	NA	0.598	NA	NA	0.637667	NA	NA	NA	NA	NA	0.623667	NA	0.696667	NA	NA	NA	0.113333
Aamp	chr1	-	74281088	74281179	74279839	74280309	74281735	74282550	NA	NA	NA	NA	NA	NA	NA	NA	NA	NA	NA	NA	0.408667	NA	NA	NA	NA	NA	0	0.0746667	0.408667
Aamp	chr1	-	74281526	74281642	74281088	74281179	74282026	74282171	NA	NA	NA	NA	1	NA	0.957	NA	1	NA	0.957	0.561333	0.919	NA	1	1	1	0.817	0.881667	1	0.438667
Aamp	chr1	-	74281526	74281642	74281088	74281179	74282410	74282550	NA	NA	NA	NA	NA	NA	1	NA	NA	NA	1	0.780667	NA	NA	NA	1	1	0.881667	1	NA	0.219333
Aar2	chr2	+	156549851	156550027	156547609	156547883	156550648	156551065	0.161333	0.126333	0.117333	0.124667	0.151667	0.231333	0.088	0.086	0.073	0.085	0.093	0.077	0.117333	0.147	0.088	0.114333	0.137	0.130667	0.0713333	0.114667	0.16
Aar2	chr2	+	156549884	156550027	156547583	156547883	156550648	156551449	0.157	0.120667	0.110333	0.100333	0.136667	0.198667	0.0803333	0.07	0.062	0.079	0.0696667	0.0696667	0.092	0.127	0.0736667	0.0883333	0.101333	0.111	0.0666667	0.0996667	0.136667
Aars2	chr17	+	45515244	45515283	45514784	45514893	45515944	45516078	NA	NA	NA	NA	NA	NA	NA	NA	NA	1	0.966	1	NA	1	NA	0.917667	NA	0.898667	NA	NA	0.101333
Aasdh	chr5	-	76877526	76877658	76875985	76876422	76878403	76878526	1	0.95	0.983667	0.989	0.989667	0.925333	0.959	0.943667	0.962	0.964667	0.969333	0.976333	0.972	0.901333	0.904	0.917333	0.974333	0.872667	0.969333	0.964333	0.127333
Aasdh	chr5	-	76877526	76877658	76876459	76876678	76878403	76878526	NA	1	1	1	1	0.828667	1	NA	0.986667	1	1	1	1	1	0.982333	1	1	0.961	NA	NA	0.171333
Aasdh	chr5	-	76878403	76878526	76876167	76876422	76882266	76882360	NA	NA	NA	NA	NA	NA	NA	NA	NA	NA	NA	NA	NA	1	0.867333	1	NA	NA	NA	0.666667	0.333333
Aasdh	chr5	-	76891602	76891795	76888592	76888834	76894289	76894362	1	0.929667	0.895333	1	1	1	0.988333	1	0.988667	1	1	0.987333	0.959333	0.969333	0.978667	1	0.94	0.969667	0.936333	0.987333	0.104667
Aasdh	chr5	-	76894289	76894362	76888592	76888834	76896376	76896690	0.795667	NA	NA	NA	0.666333	0.805	0.734	NA	0.795667	0.347	0.852667	0.666667	0.715333	0.852667	0.905333	0.795667	0.691667	0.681333	0.896	0.828667	0.558333
Aasdh	chr5	-	76894289	76894362	76891602	76891795	76896376	76896690	0.137	NA	0.0916667	0.147667	0.166667	0.176667	0.0873333	0.144	0.104	0.118667	0.0866667	0.176333	0.219667	0.176333	0.307	0.191667	0.194667	0.177667	0.153333	0.204333	0.220333
Aasdh	chr5	-	76901917	76902185	76901160	76901281	76904208	76904380	0.914	0.928	0.942333	0.901	0.889	0.935333	0.968333	0.938	0.95	0.988667	0.943333	0.930667	0.972	1	0.940333	0.933333	0.974	0.925333	0.973	0.951667	0.111
Aasdh	chr5	-	76904208	76904380	76901160	76901281	76905422	76905427	1	0.869	1	1	NA	1	1	1	0.945	1	1	NA	1	1	1	NA	NA	NA	1	0.959	0.131
Aasdh	chr5	-	76904257	76904380	76902094	76902185	76904958	76905012	0.772	1	0.977333	0.801	0.956	0.852667	0.918333	0.933667	0.91	0.895333	0.933333	0.917667	1	0.905333	0.892	0.778333	0.732333	0.758	0.881667	0.933667	0.267667
Aasdh	chr5	-	76904958	76905012	76901917	76902185	76905422	76905487	0.753	NA	NA	NA	NA	NA	0.333333	0.333333	NA	NA	NA	NA	NA	NA	0.0863333	NA	0.861	NA	NA	NA	0.774667
Aasdh	chr5	-	76904958	76905012	76904208	76904380	76905422	76905487	0.429	0.417333	0.66	0.477333	0.592	0.356	0.589	0.449667	0.529	0.606333	0.679333	0.421	0.525667	0.177	0.417667	0.282667	0.378	0.411	0.389333	0.371667	0.502333
Aasdh	chr5	-	76904958	76905012	76904208	76904380	76905422	76905503	NA	NA	0.66	NA	NA	NA	NA	0.449667	0.529	0.606333	NA	NA	NA	NA	NA	NA	NA	NA	NA	NA	0.210333
Aasdhppt	chr9	-	4308693	4308919	4302469	4302631	4309253	4309467	0.760667	0.638	0.847	0.690333	0.821	0.801	0.834333	0.780333	0.883667	0.836333	0.863	0.864667	0.844667	0.810333	0.805333	0.806	0.820667	0.745333	0.872333	0.821	0.245667
Aasdhppt	chr9	-	4308693	4308919	4302469	4302631	4309287	4309469	0.725333	0.615333	0.783333	0.753667	0.840667	0.908	0.924	0.806	0.882667	0.765667	0.805333	0.810667	0.858	0.953	0.898333	0.810333	0.777	0.933667	0.77	0.85	0.337667
Aatf	chr11	-	84445626	84445707	84422854	84423019	84467460	84467544	NA	NA	NA	NA	NA	NA	NA	0.252	0.333333	NA	NA	NA	NA	NA	NA	0.126	0.056	0.149	NA	NA	0.277333
Aatk	chr11	-	120016727	120016807	120016312	120016431	120021401	120021535	NA	NA	NA	NA	NA	NA	0.882333	NA	1	NA	NA	NA	NA	NA	NA	NA	NA	NA	NA	NA	0.117667
AB124611	chr9	+	21535907	21535997	21528762	21529083	21539086	21539114	NA	NA	NA	1	NA	NA	NA	1	NA	0.666667	NA	1	NA	1	NA	0.934333	NA	1	NA	NA	0.333333
AB124611	chr9	+	21540585	21540623	21539841	21539885	21544676	21545333	NA	NA	NA	NA	NA	NA	1	NA	NA	NA	0.868333	1	NA	NA	NA	NA	1	NA	NA	NA	0.131667
Abat	chr16	+	8611126	8611294	8608855	8608993	8613982	8614129	0.542	0.379333	0.495	0.462	0.589	0.481333	0.597333	0.582333	0.637333	0.527333	0.547667	0.524333	0.565667	0.615	0.59	0.558	0.615	0.537333	0.581667	0.609667	0.258
Abca1	chr4	-	53050934	53051009	53050288	53050458	53059256	53059362	0.942333	NA	0.694333	0.956	0.983667	NA	0.929	0.899333	0.866	0.964667	0.954333	0.854333	0.897667	0.839667	0.84	0.898	0.847667	0.956333	0.923	0.938	0.289333
Abca1	chr4	-	53143929	53144095	53132921	53133015	53159675	53159895	1	NA	1	0.882	0.882	1	0.986333	1	0.984667	1	0.981333	0.906667	0.954	0.982	1	0.971	0.979667	0.972	1	0.979333	0.118
Abca12	chr1	-	71291331	71291518	71288537	71288756	71292413	71292569	NA	NA	NA	NA	NA	NA	NA	NA	1	NA	NA	NA	1	NA	0.881	NA	1	NA	NA	NA	0.119
Abca13	chr11	+	9256169	9256333	9251358	9251387	9258460	9258591	1	NA	NA	NA	NA	NA	NA	NA	1	NA	1	NA	1	NA	NA	NA	NA	NA	0.855	NA	0.145
Abca13	chr11	+	9354825	9354916	9335130	9335270	9373272	9373449	NA	NA	NA	NA	NA	NA	NA	NA	NA	NA	NA	NA	NA	NA	0.666667	NA	1	NA	NA	NA	0.333333
Abca13	chr11	+	9354825	9354916	9345939	9346053	9373272	9373449	NA	NA	NA	NA	NA	NA	1	NA	0.666667	NA	0.845333	NA	NA	NA	NA	NA	1	NA	NA	NA	0.333333
Abca13	chr11	+	9373272	9373449	9354825	9354916	9378213	9378520	0.864	NA	NA	NA	1	NA	NA	NA	NA	NA	NA	NA	NA	NA	NA	NA	NA	NA	1	NA	0.136
Abca13	chr11	+	9566275	9566330	9542061	9542173	9567667	9567845	NA	NA	NA	NA	NA	NA	1	0.666667	NA	NA	NA	NA	NA	NA	NA	NA	NA	NA	1	NA	0.333333
Abca3	chr17	+	24357918	24357991	24352022	24352251	24364476	24364586	1	NA	NA	NA	NA	NA	NA	1	NA	NA	NA	NA	NA	NA	NA	NA	NA	NA	0.868	NA	0.132
Abca3	chr17	+	24357918	24357991	24352096	24352251	24360887	24361089	0.750333	NA	0.705333	0.865333	0.788667	0.852667	0.760667	0.834667	0.726667	0.626667	0.728333	0.835333	0.619	0.656333	0.616	0.653667	0.728667	0.738333	0.735	0.697333	0.249333
Abca3	chr17	+	24357918	24357991	24352096	24352251	24364476	24364586	NA	NA	NA	NA	NA	NA	0.906333	NA	NA	NA	NA	NA	NA	NA	NA	NA	NA	NA	0.868	0.982667	0.114667
Abca4	chr3	+	122102674	122102880	122087293	122087491	122103433	122103610	1	NA	0.990667	1	0.961667	NA	NA	NA	1	1	1	NA	NA	1	1	0.81	NA	1	NA	NA	0.19
Abca4	chr3	+	122157834	122157958	122156337	122156485	122158313	122158443	0.970333	1	0.847667	0.867	0.947333	NA	0.907667	0.579667	0.809333	0.829333	0.778333	0.926	0.914667	1	0.921333	0.795333	0.932667	1	0.933333	0.517667	0.482333
Abca5	chr11	-	110306244	110306355	110304849	110305025	110309389	110309448	1	NA	1	0.823333	NA	NA	1	1	NA	1	NA	NA	NA	NA	NA	NA	NA	NA	0.951333	1	0.176667
Abca6	chr11	-	110211656	110211823	110210084	110210218	110212190	110212374	NA	NA	NA	NA	NA	NA	NA	1	NA	0.820333	NA	1	NA	NA	NA	1	NA	NA	NA	NA	0.179667
Abca6	chr11	-	110214111	110214228	110212190	110212374	110216515	110216655	NA	NA	NA	NA	NA	NA	NA	NA	NA	1	NA	NA	NA	1	NA	0.891333	NA	1	NA	NA	0.108667
Abca6	chr11	-	110248345	110248550	110247265	110247424	110250397	110250504	NA	NA	NA	NA	NA	1	NA	0.965667	1	0.828667	NA	0.892	NA	0.973	NA	0.913333	NA	0.898	NA	NA	0.171333
Abca7	chr10	+	80007135	80007228	80006885	80006922	80007653	80007778	0.929333	0.774333	1	1	1	NA	1	1	0.965333	1	1	NA	NA	NA	1	NA	NA	NA	0.948333	1	0.225667
Abca7	chr10	+	80007299	80007451	80007135	80007228	80007653	80007778	0.927667	1	1	0.799	1	NA	1	0.971667	0.971333	1	0.964	1	0.967	1	0.949667	1	0.987667	1	0.970333	0.981333	0.201
Abca7	chr10	+	80007323	80007451	80007135	80007228	80007653	80007778	0.922333	1	1	0.776333	1	1	1	0.973	0.961667	1	0.963333	1	0.961	1	0.94	1	0.986333	1	0.958667	0.979333	0.223667
Abca7	chr10	+	80008538	80008571	80008144	80008432	80008662	80008840	0.980333	1	1	0.942	0.965667	1	0.935	0.923667	0.975333	1	0.935	0.942667	0.893	0.974	0.875	0.892667	0.964333	0.945667	0.99	0.933667	0.125
Abca7	chr10	+	80013618	80013760	80013311	80013418	80014228	80014332	NA	NA	0.892667	NA	NA	NA	1	NA	NA	NA	NA	NA	NA	NA	NA	NA	NA	NA	0.980333	NA	0.107333
Abca8b	chr11	-	109934722	109934778	109932189	109934611	109935715	109935795	NA	NA	NA	0.845	0.469333	NA	NA	0.736333	NA	0.736333	NA	0.708333	NA	0.735667	NA	0.85	NA	0.877667	0.844	0.671333	0.408333
Abca8b	chr11	-	109955034	109955201	109953497	109953631	109957062	109957258	NA	NA	NA	0.941667	NA	NA	NA	0.942667	1	0.961667	NA	0.877	NA	0.857333	NA	0.877	NA	NA	0.772333	0.862667	0.227667
Abca8b	chr11	-	109974507	109974693	109973670	109973818	109974989	109975131	1	NA	NA	0.955	NA	0.849	NA	0.888667	NA	0.878333	NA	0.927667	NA	0.854333	NA	0.963	NA	1	0.828	0.828	0.172
Abca8b	chr11	-	109980849	109981054	109979861	109980023	109981677	109981779	0.810333	NA	NA	NA	NA	NA	NA	NA	NA	NA	NA	NA	NA	NA	NA	NA	NA	NA	1	NA	0.189667
Abca9	chr11	-	110160399	110160564	110158953	110159057	110163170	110163378	NA	NA	NA	NA	NA	0.937333	NA	1	1	0.818	NA	0.961	NA	1	NA	0.944	NA	0.904333	NA	NA	0.182
Abcb1b	chr5	+	8810557	8810615	8806007	8806170	8812654	8812846	1	0.953333	NA	1	NA	NA	1	0.553667	NA	0.835333	NA	0.829	0.835333	0.910667	NA	1	1	0.953333	1	NA	0.446333
Abcb1b	chr5	+	8812654	8812846	8806007	8806170	8813573	8813745	NA	NA	NA	NA	NA	NA	1	NA	NA	1	NA	NA	0.666667	NA	NA	0.666667	NA	1	NA	NA	0.333333
Abcb1b	chr5	+	8864114	8864261	8861423	8861630	8865749	8866315	NA	NA	1	NA	NA	NA	NA	1	NA	0.899	NA	1	NA	NA	NA	1	NA	NA	NA	NA	0.101
Abcb4	chr5	+	8905974	8906032	8899567	8899718	8907207	8907399	NA	NA	NA	NA	NA	NA	NA	1	NA	NA	NA	NA	NA	NA	NA	NA	NA	NA	0.666667	NA	0.333333
Abcb8	chr5	+	24406399	24406494	24405814	24405848	24408567	24408818	1	NA	NA	NA	0.666667	NA	NA	NA	NA	NA	NA	NA	NA	0.666667	NA	NA	NA	NA	NA	NA	0.333333
Abcb9	chr5	-	124073593	124073753	124071706	124071847	124076021	124076195	NA	NA	NA	NA	NA	NA	NA	NA	NA	NA	1	NA	1	NA	NA	NA	0.768333	1	NA	NA	0.231667
Abcc1	chr16	+	14390283	14390322	14389806	14389983	14391317	14391443	0	NA	0	0.0133333	0.00933333	0.114333	0	0.024	NA	0	0	0	0.00433333	0.013	0	0	0.005	0	0.0183333	0	0.114333
Abcc1	chr16	+	14405013	14405145	14396350	14396476	14419699	14419792	NA	NA	NA	NA	NA	NA	1	0.831	NA	NA	NA	1	NA	1	NA	NA	NA	NA	NA	NA	0.169
Abcc1	chr16	+	14437645	14437737	14436506	14436653	14439986	14440059	0.952667	1	0.969	0.976667	0.896	1	0.989	0.987	1	1	0.978	0.958333	1	1	0.984667	0.918	1	1	1	0.974667	0.104
Abcc1	chr16	+	14445292	14445469	14439986	14440059	14457887	14457969	0.851333	NA	1	NA	1	NA	1	NA	1	NA	NA	1	0.904333	1	0.951	1	1	0.922667	1	0.862	0.148667
Abcc1	chr16	+	14448399	14448583	14445292	14445469	14457887	14457969	0.793	NA	NA	NA	NA	NA	0.797333	0.672	0.736667	NA	0.779	NA	0.808	0.555	0.713333	NA	0.736667	0.579333	0.858333	0.748333	0.303333
Abcc10	chr17	-	46310037	46310233	46306956	46307300	46310376	46310530	0.981	0.921333	0.987	0.938333	0.935333	1	0.987333	1	0.985	0.940333	0.942667	0.967	0.932333	0.898667	0.986	0.928667	0.962	0.925667	0.926	0.967	0.101333
Abcc3	chr11	-	94368440	94368618	94368180	94368342	94371618	94371807	NA	NA	NA	NA	NA	NA	NA	NA	NA	NA	NA	NA	NA	0.874333	NA	1	NA	NA	1	0.764	0.236
Abcc6	chr7	-	45989537	45989745	45986330	45986641	45990287	45990414	NA	NA	NA	NA	NA	NA	NA	NA	NA	NA	NA	NA	NA	NA	NA	NA	NA	NA	0.809667	0.707	0.102667
Abcc6	chr7	-	45995180	45995340	45992307	45992383	45996654	45996822	NA	NA	NA	NA	NA	NA	NA	NA	1	NA	0.822333	NA	1	NA	1	NA	NA	0.666667	1	0.888	0.333333
Abcc8	chr7	-	46105463	46105526	46104581	46104761	46105808	46105833	NA	NA	0.874667	NA	1	NA	1	NA	1	0.799667	NA	NA	1	NA	NA	1	1	0.952333	0.854	0.952333	0.200333
Abcc8	chr7	-	46107237	46107316	46106951	46107060	46108314	46108435	NA	NA	NA	NA	1	NA	NA	NA	NA	NA	0.763333	NA	NA	NA	NA	NA	1	1	NA	NA	0.236667
Abcc8	chr7	-	46107237	46108214	46106951	46107060	46108314	46109643	NA	NA	NA	NA	1	NA	1	1	1	NA	0.758	NA	1	NA	0.894333	1	1	NA	NA	NA	0.242
Abcc8	chr7	-	46108083	46108214	46107237	46107316	46108314	46108435	0.823	NA	1	NA	0.877	NA	0.903	NA	1	NA	0.887	NA	1	1	NA	1	1	0.666667	1	NA	0.333333
Abcc8	chr7	-	46108752	46108866	46108314	46108435	46109540	46109643	1	NA	NA	NA	NA	NA	0.892333	NA	1	0.803667	1	NA	1	1	0.907667	1	0.950667	1	0.849667	0.907667	0.196333
Abcc8	chr7	-	46118955	46119081	46117969	46118069	46120374	46120512	0.866333	NA	NA	NA	NA	NA	1	1	NA	NA	1	NA	1	NA	1	NA	0.809333	1	1	1	0.190667
Abcc8	chr7	-	46139464	46139505	46137958	46138104	46150726	46150889	NA	NA	NA	NA	NA	NA	NA	NA	NA	NA	NA	NA	1	0.81	NA	1	NA	1	NA	1	0.19
Abcc8	chr7	-	46154416	46154572	46151535	46151670	46157106	46157271	1	NA	NA	NA	0.727333	NA	NA	NA	NA	NA	1	NA	NA	NA	1	0.869667	NA	1	NA	NA	0.272667
Abcc9	chr6	-	142648026	142648065	142646271	142646373	142652526	142652632	NA	0.988333	NA	1	NA	1	NA	1	NA	0.984667	1	1	0.885333	1	NA	0.971333	0.917667	1	NA	NA	0.114667
Abcd4	chr12	-	84605871	84605963	84605347	84605384	84606099	84606308	0.854667	0.963333	1	0.91	1	0.831667	0.962667	0.930667	0.888667	0.877667	0.896	0.916667	0.929667	0.947333	0.946	0.919	0.984667	0.986333	0.977	0.989333	0.168333
Abcd4	chr12	-	84605871	84605963	84605347	84605384	84608569	84608659	0.406667	0.373667	0.399333	0.382333	NA	0.592667	0.644	0.460333	0.457	0.499333	0.571333	0.399	0.485333	0.338	NA	0.489333	0.557	0.350333	0.392333	NA	0.306
Abcd4	chr12	-	84606099	84606308	84605347	84605384	84608569	84608659	0.642	0.716	0.725	0.658333	0.776333	0.799667	0.767333	0.638667	0.615333	0.680667	0.733	0.592667	0.763667	0.616	0.662333	0.675	0.804333	0.537667	0.612667	0.628333	0.266667
Abcd4	chr12	-	84608569	84608659	84605347	84605384	84617282	84617466	NA	NA	NA	NA	NA	NA	NA	NA	NA	NA	NA	NA	NA	NA	0.789333	1	NA	NA	NA	NA	0.210667
Abcd4	chr12	-	84609378	84609473	84608805	84608897	84617282	84617466	NA	NA	NA	NA	NA	NA	NA	NA	NA	0.511667	0.666667	0	NA	NA	NA	0.025	0	NA	NA	NA	0.666667
Abcd4	chr12	-	84609378	84609473	84608974	84609096	84617282	84617466	0.967	0.892	0.886333	0.947333	0.944	NA	0.958333	0.953667	0.934333	0.928	0.890333	0.949	1	0.805	0.968667	0.797667	0.937333	0.718	0.928	NA	0.282
Abcd4	chr12	-	84611720	84611771	84608805	84608897	84617282	84617466	NA	NA	NA	NA	NA	NA	NA	NA	NA	0.601667	NA	0.259333	NA	NA	NA	0.299667	NA	0.701	NA	NA	0.441667
Abcd4	chr12	-	84611720	84611771	84608974	84609096	84617282	84617466	NA	NA	0.225667	NA	NA	NA	NA	NA	NA	0.733	0.138333	NA	NA	0.216667	NA	0.379667	NA	0.21	0.529667	NA	0.594667
Abcd4	chr12	-	84611720	84611771	84609378	84609473	84617282	84617466	0.952667	NA	1	1	0.917	NA	1	0.944333	0.926667	0.896667	0.926667	1	1	1	0.839	0.969667	1	0.906	1	NA	0.161
Abcd4	chr12	-	84612324	84612450	84611720	84611771	84617282	84617466	0.948667	0.948667	0.973333	0.851667	1	0.886333	0.96	0.960667	1	0.821333	0.965333	NA	0.952333	0.942667	0.958333	0.815333	0.969667	0.813333	0.903333	0.981	0.186667
Abcd4	chr12	-	84612779	84612896	84612324	84612450	84613904	84614044	0.897333	0.929333	0.870667	0.98	0.884333	0.931	0.913	0.860667	0.885	0.887667	0.881	0.862	0.927	0.886333	0.883333	0.861333	0.870667	0.814333	0.869333	0.945	0.165667
Abcd4	chr12	-	84612779	84612896	84612324	84612450	84615076	84615204	NA	NA	1	0.828667	NA	NA	NA	NA	NA	NA	NA	NA	NA	NA	NA	NA	NA	NA	NA	NA	0.171333
Abcd4	chr12	-	84613904	84614044	84611720	84611771	84617282	84617466	0.831	NA	0.913	0.723	1	NA	NA	NA	1	NA	NA	NA	NA	NA	NA	NA	NA	NA	NA	NA	0.277
Abcd4	chr12	-	84613904	84614044	84612324	84612450	84615076	84615204	1	1	1	0.857667	NA	1	1	1	1	0.986	NA	1	1	1	0.988667	1	1	0.972333	0.965667	1	0.142333
Abcd4	chr12	-	84615076	84615204	84613904	84614044	84617282	84617466	0.741667	NA	NA	0.647333	0.767333	NA	0.799333	0.569333	0.745	0.61	0.728667	0.541667	0.767	0.817667	0.760333	0.686	0.791333	0.618667	0.720333	0.798	0.276
Abcd4	chr12	-	84615325	84615444	84611720	84611771	84617282	84617466	0.911333	NA	NA	NA	NA	NA	0.868667	0.936	1	NA	0.916	NA	0.934667	NA	NA	NA	NA	NA	0.859667	NA	0.140333
Abcd4	chr12	-	84615325	84615444	84613904	84614044	84617282	84617466	NA	NA	0.372333	NA	NA	NA	0.578333	NA	0.579	0.397333	0.555667	NA	NA	NA	0.554333	NA	NA	NA	NA	NA	0.206667
Abcg2	chr6	+	58650460	58650543	58640581	58640627	58655637	58655856	0.0166667	0.293667	0.0296667	0.05	0.0243333	0.0476667	0	0.067	0.038	0.112	0.125	0.046	0.0846667	0.038	0.0356667	0.0996667	0.016	0.0466667	0.085	0.04	0.293667
Abcg4	chr9	-	44278971	44279114	44278031	44278130	44279302	44279417	0.892333	0.954333	1	0.842667	0.666667	NA	NA	0.916	0.772667	0.856333	1	0.916333	1	0.919667	NA	0.915	NA	0.889333	0.967667	0.922	0.333333
Abcg5	chr17	-	84672153	84672293	84671121	84671251	84673522	84673655	0.926667	0.904	0.917667	0.56	0.888	NA	0.973	0.851333	0.972	0.966667	0.903333	0.752333	0.888667	0.884333	0.882333	0.830333	0.91	0.948	0.847	1	0.44
Abcg8	chr17	+	84688531	84688688	84686616	84686721	84691799	84692038	NA	NA	0.48	1	0.573333	NA	0.568667	NA	0.879667	1	0.539667	NA	0.727667	0.688333	0.769	NA	0.595333	NA	NA	NA	0.52
Abcg8	chr17	+	84695241	84695322	84694991	84695154	84695951	84696151	NA	1	NA	NA	0.943	NA	0.815667	0.749333	0.917333	NA	0.948333	NA	1	1	1	NA	1	NA	1	NA	0.250667
Abcg8	chr17	+	84696673	84696750	84695951	84696151	84697294	84697562	1	NA	1	NA	NA	NA	1	NA	NA	NA	1	NA	0.972667	1	1	0.745333	1	1	NA	NA	0.254667
Abhd1	chr5	+	30952884	30953045	30950088	30950248	30953342	30953402	0.609667	0.551	0.932333	1	0.808333	1	0.926667	0.891667	0.979667	0.829667	0.967	0.956	0.979667	0.959333	0.908667	0.894	0.899333	0.907	0.859333	0.943667	0.449
Abhd1	chr5	+	30953878	30953991	30953666	30953712	30954090	30954154	1	1	NA	1	1	NA	0.928667	0.868	1	0.908	0.950667	1	1	0.924333	NA	1	1	1	0.892667	1	0.132
Abhd10	chr16	-	45740318	45740502	45737523	45737635	45742776	45742955	0.847333	0.756	0.802	0.772667	0.798333	0.767667	0.808	0.795667	0.814	0.798667	0.776333	0.821333	0.811	0.721667	0.743667	0.707	0.81	0.711333	0.845	0.792333	0.140333
Abhd11os	chr5	-	135012693	135012788	135012429	135012550	135013084	135013253	NA	NA	NA	NA	NA	NA	1	NA	NA	NA	NA	NA	0.965	1	1	NA	1	NA	1	0.844	0.156
Abhd13	chr8	+	9982863	9982970	9977706	9978019	9987384	9992155	0.349333	0.212667	0.264667	0.402	0.39	0.34	0.376667	0.249	0.228667	0.236667	0.348	0.272667	0.429	0.247333	0.339667	0.296	0.329333	0.334667	0.326667	0.367	0.216333
Abhd14a	chr9	-	106445525	106445829	106444089	106444306	106447530	106447620	0.242667	0.254667	0.285	0.243	0.304333	0.270667	0.202333	0.217	0.216	0.155	0.216	0.139	0.221333	0.177667	0.254333	0.164667	0.244333	0.161	0.154333	0.166667	0.165333
Abhd14a	chr9	-	106445525	106445834	106444089	106444306	106447530	106447563	0.384333	0.352667	0.469333	0.366333	0.478667	0.456333	0.302	0.298	0.320667	0.212667	0.301333	0.22	0.395667	0.358333	0.422	0.276333	0.426333	0.306667	0.234	0.296	0.266
Abhd16a	chr17	+	35096481	35096604	35094250	35094336	35100334	35100398	NA	NA	NA	NA	NA	NA	NA	NA	NA	NA	1	0.733667	NA	NA	NA	NA	NA	NA	NA	NA	0.266333
Abhd18	chr3	+	40906166	40906218	40905871	40905956	40910502	40910603	0.0283333	0	0.032	0.0956667	0	0	0	0.0186667	0.0273333	0.05	0	0.057	0.027	0.0803333	0	0.012	0.118667	0.0453333	0.056	0.00833333	0.118667
Abhd18	chr3	+	40910502	40910603	40894262	40894443	40916685	40916764	NA	1	NA	NA	NA	1	NA	0.888333	NA	NA	NA	0.953	NA	0.855667	NA	1	NA	NA	1	NA	0.144333
Abhd18	chr3	+	40910502	40910603	40894305	40894443	40916685	40916764	NA	NA	NA	NA	NA	NA	1	0.888333	NA	1	1	0.953	1	0.855667	NA	NA	NA	1	NA	1	0.144333
Abhd18	chr3	+	40910502	40910603	40905871	40905956	40916685	40916764	0.971	0.968	0.886333	0.984333	1	0.870667	1	0.941667	0.971667	1	1	1	0.969667	1	0.922667	0.874	1	0.929	1	0.909667	0.129333
Abhd18	chr3	+	40919387	40919405	40916871	40917067	40923412	40923551	NA	NA	1	NA	NA	NA	0.846	1	1	1	1	NA	1	1	NA	0.953333	1	1	1	NA	0.154
Abhd2	chr7	+	79297007	79297303	79273253	79273339	79323468	79323644	NA	NA	NA	NA	NA	NA	1	NA	NA	NA	NA	NA	0.666667	NA	NA	NA	NA	NA	NA	NA	0.333333
Abhd3	chr18	-	10647969	10648018	10647725	10647891	10652187	10652361	0.965333	NA	0.806	NA	0.894667	NA	1	NA	0.757667	NA	1	NA	0.727333	1	1	NA	1	NA	0.908333	0.933667	0.272667
Abhd5	chr9	+	122365135	122365221	122351607	122351839	122367888	122368261	0.910333	0.963	0.916	0.922333	0.933667	0.972333	0.945	0.863333	0.92	0.906667	0.919	0.926333	0.924	0.906667	0.889667	0.912667	0.911667	0.857333	0.921	0.905333	0.115
Abhd5	chr9	+	122367888	122368261	122351731	122351839	122375905	122376060	0.882667	0.956667	0.969333	0.902667	0.941	0.942333	0.937	0.941667	0.950667	0.918	0.956	0.950333	0.936333	0.859667	0.894	0.930333	0.916667	0.912	0.91	0.914667	0.109667
Abhd5	chr9	+	122367888	122368261	122351731	122351839	122377858	122377932	1	1	0.867	0.897667	0.704	NA	0.733667	NA	1	NA	0.917	0.889333	1	1	NA	0.795333	1	0.969	1	0.81	0.296
Abhd6	chr14	+	8028236	8028389	8002901	8002963	8039747	8039904	0.903333	0.747333	0.898667	0.809333	0.910333	0.712333	0.884667	0.811333	0.898333	0.859667	0.899333	0.902333	0.837333	0.844333	0.905	0.88	0.748333	0.778333	0.863333	0.807667	0.198
Abi1	chr2	-	22950183	22950270	22946575	22946761	22953434	22953611	0.818333	0.901333	0.819667	0.922667	0.841667	0.923667	0.836333	0.894333	0.865	0.918667	0.843	0.928	0.793	0.903667	0.778	0.918667	0.8	0.932333	0.795	0.769333	0.163
Abi1	chr2	-	22953434	22953608	22946575	22946761	22957017	22957118	0.972	0.867333	0.956	0.965667	0.947333	0.922333	0.944667	0.979333	0.945333	0.977	0.932667	0.961	0.919333	0.948333	0.901667	0.956667	0.936333	0.927667	0.964333	0.95	0.112
Abi1	chr2	-	22953434	22953611	22946575	22946761	22957017	22957118	0.968333	0.815	0.949	0.963667	0.944	0.902667	0.937667	0.975	0.94	0.974333	0.925	0.957	0.915	0.949667	0.897333	0.953	0.932667	0.924	0.960667	0.949667	0.16
Abi1	chr2	-	22957017	22957118	22946575	22946761	22994522	22994690	NA	NA	NA	NA	NA	NA	NA	1	NA	1	1	0.874667	1	1	1	NA	0.911333	1	1	0.944333	0.125333
Abi1	chr2	-	22962400	22962501	22957017	22957118	22994522	22994690	NA	NA	NA	NA	NA	NA	NA	NA	NA	0.508333	0.452	NA	NA	NA	NA	NA	NA	0.293667	NA	NA	0.214667
Abi1	chr2	-	22963213	22963228	22962400	22962501	22994522	22994690	NA	NA	NA	NA	NA	NA	NA	NA	NA	NA	NA	NA	0	0.179333	NA	NA	0.213667	NA	0.191	0.314667	0.314667
Abi3	chr11	-	95833208	95833331	95832722	95832876	95833639	95833800	NA	1	NA	0.903	NA	0.946333	NA	0.875667	NA	0.784	NA	0.869	NA	0.843333	NA	0.874667	NA	0.968333	1	0.810333	0.216
Abi3	chr11	-	95833208	95833334	95831942	95832876	95833639	95833800	NA	1	NA	0.948333	NA	0.969	NA	0.921	NA	0.876	NA	0.928667	NA	0.906	1	0.935333	NA	0.981333	1	0.842667	0.157333
Abi3bp	chr16	+	56594461	56594536	56592603	56592681	56642488	56642560	NA	NA	NA	NA	NA	NA	NA	NA	NA	1	NA	NA	NA	NA	NA	1	0.666667	1	NA	NA	0.333333
Abi3bp	chr16	+	56595239	56595314	56594461	56594536	56596233	56596305	NA	NA	NA	NA	NA	NA	NA	NA	NA	0.313667	NA	NA	NA	0.828	NA	0.863667	NA	0.883	NA	NA	0.569333
Abi3bp	chr16	+	56604624	56604699	56604034	56604109	56642488	56642560	NA	NA	NA	NA	NA	NA	NA	NA	NA	0.666667	NA	NA	NA	NA	NA	1	NA	NA	NA	NA	0.333333
Abi3bp	chr16	+	56611042	56611084	56606118	56606193	56642488	56642560	NA	NA	NA	NA	NA	NA	NA	NA	NA	0.542667	NA	NA	NA	0.500333	0.333333	0.58	NA	0.538	NA	NA	0.246667
Abi3bp	chr16	+	56613166	56613253	56611042	56611084	56642488	56642560	NA	NA	NA	NA	NA	NA	NA	NA	NA	0.790333	NA	0.879667	NA	0.658667	NA	0.527667	NA	0.441667	NA	0.666667	0.438
Abi3bp	chr16	+	56613672	56613720	56613166	56613253	56642488	56642560	NA	NA	NA	0.806333	NA	NA	NA	NA	NA	NA	NA	NA	NA	0.721333	NA	0.766	NA	0.859667	NA	NA	0.138333
Abi3bp	chr16	+	56614689	56614752	56613672	56613720	56642488	56642560	NA	NA	NA	NA	NA	NA	NA	NA	NA	NA	NA	NA	NA	0.246	NA	0.07	NA	0.062	NA	NA	0.184
Abi3bp	chr16	+	56650710	56650770	56647024	56647099	56652136	56652217	NA	NA	NA	NA	NA	NA	NA	NA	NA	0.584667	NA	NA	0.467667	0.777333	1	0.567333	NA	0.575333	NA	0.502	0.532333
Abi3bp	chr16	+	56651306	56651354	56650710	56650770	56652136	56652217	NA	NA	NA	0.666667	NA	NA	NA	NA	NA	NA	NA	NA	NA	0.671333	0.473	0.657	1	0.871667	NA	0.530333	0.527
Abi3bp	chr16	+	56660163	56660238	56657265	56657331	56666628	56666703	NA	NA	NA	1	NA	NA	1	1	NA	0.819667	NA	1	NA	0.951	1	0.981	1	0.954667	NA	1	0.180333
Abl1	chr2	+	31695748	31695892	31688536	31689942	31706615	31707082	0.6	NA	0.629333	NA	1	NA	0.572333	0.841333	0.649	0.929333	0.752667	0.689	1	0.543	1	0.596	0.827333	0.877333	0.899667	0.518	0.482
Abl1	chr2	+	31695748	31695892	31688536	31689942	31784506	31784779	NA	NA	NA	NA	0.860667	NA	1	0.597667	0.608	0.803667	0.84	0.706333	NA	0.688	0.803667	0.485667	0.827333	0.481667	1	NA	0.518333
Abl2	chr1	+	156620838	156620901	156559048	156559205	156622484	156622655	0.708	0.588	0.721667	0.751667	0.662	0.927333	0.683667	0.679333	0.669333	0.573667	0.665333	0.590667	0.795667	0.694667	0.861	0.655	0.712667	0.655	0.671333	0.616	0.353667
Abl2	chr1	+	156620838	156620901	156615922	156616058	156622484	156622655	0.975667	NA	0.894667	0.822	0.897333	0.984667	1	0.880333	0.949	0.937333	0.945333	0.829	0.975667	0.965333	1	0.826333	0.859667	0.949	0.911	1	0.178
Ablim1	chr19	-	57048366	57048433	57044880	57044972	57049461	57049509	0.131333	NA	NA	NA	0.333333	NA	0.082	NA	0.0466667	0	NA	NA	0.0383333	0	0	NA	0.0843333	NA	0	0.0223333	0.333333
Ablim1	chr19	-	57048366	57048433	57046924	57047071	57061252	57061382	NA	NA	NA	NA	NA	NA	0.596	NA	0.748667	NA	NA	NA	NA	NA	0.855333	NA	NA	NA	NA	NA	0.259333
Ablim1	chr19	-	57077413	57077497	57073854	57073902	57079812	57079871	NA	NA	0	NA	NA	NA	0.848333	NA	NA	NA	NA	NA	0.743333	NA	NA	NA	0.333333	0.333333	NA	NA	0.848333
Ablim2	chr5	+	35843167	35843266	35841280	35841401	35848803	35848905	0.0726667	NA	0.632333	NA	NA	NA	NA	NA	NA	NA	NA	NA	NA	0	NA	NA	NA	NA	0.191333	0.2	0.632333
Ablim2	chr5	+	35848803	35848905	35841280	35841401	35857127	35857180	1	NA	1	NA	NA	NA	NA	NA	NA	0.841333	NA	NA	NA	0.785	NA	0.626333	NA	NA	0.707667	0.955333	0.373667
Ablim2	chr5	+	35849515	35849569	35841280	35841401	35857127	35857180	NA	NA	NA	NA	NA	NA	NA	NA	NA	NA	NA	NA	NA	NA	NA	NA	NA	NA	0.333333	0.865	0.531667
Ablim2	chr5	+	35849515	35849569	35848803	35848905	35857127	35857180	NA	NA	NA	NA	NA	NA	NA	NA	NA	0.194333	NA	NA	NA	NA	NA	NA	NA	NA	0.506	0.910333	0.716
Ablim2	chr5	+	35866704	35866766	35857893	35857964	35873169	35873224	NA	NA	NA	NA	NA	NA	NA	NA	NA	NA	NA	NA	NA	NA	NA	NA	NA	NA	0.889	1	0.111
Ablim3	chr18	-	61805636	61805644	61805065	61805146	61806386	61806447	NA	NA	0.666667	NA	NA	NA	NA	NA	1	1	NA	NA	NA	NA	NA	NA	NA	NA	NA	NA	0.333333
Ablim3	chr18	-	61808931	61808961	61808379	61808438	61811310	61811458	0.749	NA	NA	NA	NA	NA	NA	1	0.651	0.928667	NA	0.539	NA	0.943	NA	0.797	0.333333	0.832333	0.765333	0.738	0.666667
Ablim3	chr18	-	61816921	61816969	61814197	61814332	61818988	61819087	NA	NA	NA	NA	NA	NA	NA	NA	NA	0.978333	NA	NA	NA	NA	NA	0.968	NA	0.561333	NA	NA	0.417
Ablim3	chr18	-	61816921	61816969	61814197	61814332	61819790	61819917	0.057	NA	0.0246667	0.139667	0	0.333333	0	0	0.257333	0.550333	0.0883333	0	0	0.354	0.0646667	0.37	0.139667	0.226	NA	0.114333	0.550333
Ablim3	chr18	-	61818988	61819087	61814197	61814332	61819790	61819917	NA	NA	0	0.175667	0	NA	0	0	0	0.732	0.0726667	0.0726667	NA	0	0	0.356667	0	0.0606667	NA	NA	0.732
Ablim3	chr18	-	61818988	61819087	61816921	61816969	61819790	61819917	NA	NA	NA	NA	NA	NA	NA	NA	NA	1	NA	NA	NA	0	NA	0.949333	NA	0.0246667	NA	NA	1
Abtb1	chr6	-	88836524	88836725	88835913	88836452	88838117	88838285	0.929667	0.990333	0.983	0.972	0.984667	0.825667	0.963333	0.982333	0.989	0.954	0.973333	0.987333	0.967667	0.979333	0.960333	0.957333	0.981667	0.964667	0.98	0.978333	0.164667
Abtb1	chr6	-	88836524	88836725	88835923	88836452	88838117	88838265	NA	0.990333	NA	NA	0.984667	0.825667	NA	NA	NA	NA	NA	NA	NA	NA	NA	NA	NA	NA	NA	NA	0.164667
Abtb1	chr6	-	88840709	88840765	88839626	88839771	88840837	88840900	0.927333	0.988667	0.957333	0.946667	0.938	0.884	0.918667	0.927	0.926667	0.963333	0.890333	0.904667	0.927	0.920667	0.898667	0.913667	0.908667	0.898333	0.866667	0.865333	0.123333
Abtb1	chr6	-	88840709	88840781	88839626	88839771	88840837	88840900	0.853333	0.973	0.901	0.860333	0.859333	0.787333	0.829667	0.840333	0.843	0.922667	0.751	0.803667	0.891	0.859667	0.838333	0.83	0.821	0.809333	0.710667	0.733667	0.262333
Abtb1	chr6	-	88840837	88840900	88839626	88839771	88841768	88841882	0.976	1	0.984667	0.896	0.990333	1	0.981	0.978333	0.982	0.974	0.994333	0.988	0.969667	0.949333	0.988333	0.988	0.972	0.969	1	0.993	0.104
Abtb1	chr6	-	88840872	88840900	88840709	88840765	88841768	88841894	0.969	1	0.965333	1	1	1	0.965333	0.961333	0.968	0.827333	0.987	0.979667	0.968	0.981667	0.958	1	1	1	0.977667	0.991333	0.172667
Abtb2	chr2	+	103683277	103683491	103678744	103678891	103700770	103700923	0.983333	0.943667	1	0.988	1	1	1	0.984333	1	0.970667	0.974667	0.996333	1	0.972333	0.886	1	1	0.976333	0.988333	0.967333	0.114
AC149090.1	chrUn_JH584304	-	56985	57151	55111	55701	58563	59690	0.845	NA	0.884	0.776	0.906333	0.875333	0.847667	0.836667	0.787667	0.839	0.820667	0.836667	0.875	0.910667	0.821	0.887	0.858333	0.922333	0.823	0.884	0.146333
AC149090.1	chrUn_JH584304	-	56985	57151	55111	55701	59591	59667	0.803333	NA	0.909	0.866333	1	0.838	0.849333	0.848667	0.9	0.868333	0.924667	0.879667	0.882	0.902667	0.851	0.890667	0.869	0.946667	0.784	0.779667	0.220333
AC149090.1	chrUn_JH584304	-	58563	58835	55111	55701	59591	59667	0.889333	1	0.966667	0.92	1	0.922333	0.918667	0.926667	0.955333	0.936	0.962	0.948	0.948333	0.969667	0.949	0.944667	0.950667	0.979667	0.884	0.913667	0.116
Acaa1b	chr9	-	119149599	119149790	119149270	119149450	119150823	119150904	NA	1	1	0.871	NA	1	1	1	1	1	1	0.975	0.972333	1	0.97	1	1	1	NA	1	0.129
Acaa1b	chr9	-	119153669	119153712	119151815	119151914	119153925	119154005	0.891	0.686	0.600667	0.659667	0.903667	NA	0.924333	0.846	0.856333	0.674	0.861333	0.789	0.820667	0.595333	0.67	0.623	0.75	0.654333	0.772667	0.687667	0.329
Acaa1b	chr9	-	119155744	119155802	119153925	119154005	119156590	119156684	0.953333	NA	0.640333	NA	0.802	NA	0.807667	0.825667	0.647	0.782667	1	0.675333	0.853	NA	0.868	0.684667	0.879333	1	0.859333	0.812333	0.359667
Acaca	chr11	+	84193078	84193125	84129671	84130130	84195437	84195687	0.959667	NA	0.959667	0.965667	0.959667	0.884667	1	0.819333	1	0.821333	0.957667	0.819	0.895333	0.904667	0.955667	NA	1	0.49	0.870667	0.963	0.51
Acaca	chr11	+	84193078	84193125	84179830	84179926	84195437	84195687	0.631	NA	0.714333	0.658333	0.649667	0.707667	0.687	0.684333	0.585	0.543333	0.681	0.663667	0.696667	0.692667	0.653	0.598333	0.660667	0.65	0.720333	0.599667	0.177
Acaca	chr11	+	84290287	84290311	84280391	84280510	84292890	84293034	0.868	0.770333	0.956	0.701333	0.989333	0.828333	0.971333	0.868667	0.977333	0.866667	0.986333	0.832333	0.976	0.900333	0.977667	0.879667	0.973333	0.854	0.931	0.933667	0.288
Acaca	chr11	+	84307116	84307158	84300420	84300465	84311266	84311482	NA	NA	NA	NA	1	NA	NA	0.866667	NA	NA	0.866667	0.809333	NA	1	1	NA	0.666667	1	1	NA	0.333333
Acacb	chr5	+	114239691	114239835	114238617	114238728	114240543	114240664	1	NA	NA	NA	1	NA	0.935667	1	1	NA	0.772333	1	1	NA	NA	NA	1	NA	1	NA	0.227667
Acad10	chr5	-	121631276	121631677	121630644	121630785	121656013	121656213	1	0.805333	1	1	0.893667	1	NA	NA	NA	0.918333	1	NA	1	NA	NA	NA	NA	NA	NA	0.939667	0.194667
Acad10	chr5	-	121631276	121631677	121630644	121630785	121656013	121656254	NA	0.805333	1	NA	NA	NA	1	0.885	0.880333	0.918333	1	1	1	0.805333	1	1	NA	1	1	0.939667	0.194667
Acad10	chr5	-	121632488	121632662	121631276	121631677	121656013	121656213	NA	NA	NA	NA	NA	NA	NA	0.503667	NA	NA	NA	NA	NA	0.369333	NA	NA	NA	NA	NA	NA	0.134333
Acad10	chr5	-	121632488	121632662	121631276	121631677	121656013	121656254	NA	NA	NA	NA	NA	NA	NA	NA	NA	NA	NA	NA	0.351	0.369333	NA	0.391	NA	0.363667	NA	0.560333	0.209333
Acad10	chr5	-	121634676	121634822	121632488	121632662	121642611	121642680	NA	NA	NA	1	NA	NA	NA	1	1	0.899333	NA	1	NA	NA	NA	1	NA	NA	NA	NA	0.100667
Acad10	chr5	-	121639123	121639305	121637243	121637394	121642611	121642680	0.788667	0.763667	0.781667	0.642667	0.888667	0.353	0.936333	0.709667	0.683333	0.947	0.815	0.507667	0.830333	0.593333	0.699667	0.785667	0.818	0.826	0.797667	0.678667	0.594
Acad10	chr5	-	121639123	121639305	121637243	121637394	121645368	121645510	NA	NA	NA	0.737667	1	0.763	1	0.921667	0.939	0.903333	1	1	NA	0.793	1	1	1	0.740333	1	0.953	0.262333
Acad10	chr5	-	121642611	121642680	121637243	121637394	121645368	121645510	NA	1	1	0.906667	1	0.886333	1	0.951	0.974667	0.958667	1	1	1	0.921	1	1	1	0.708667	1	0.979667	0.291333
Acad10	chr5	-	121642611	121642680	121639123	121639305	121645368	121645510	0.955333	1	0.979667	0.951	1	NA	0.955	1	1	1	0.964333	1	1	1	0.955333	1	0.897333	0.939667	0.978	1	0.102667
Acad10	chr5	-	121647834	121647993	121646701	121646861	121649353	121649548	0.908333	1	0.958667	1	1	1	0.980333	1	1	1	1	0.967333	1	0.879333	NA	1	NA	1	1	1	0.120667
Acad10	chr5	-	121651955	121652104	121649353	121649548	121656013	121656213	0.792333	NA	0.874333	0.898333	0.928333	0.882	0.888	0.925	0.904333	1	0.901333	0.952	0.912333	0.828333	0.828333	0.883667	0.94	0.78	0.936667	0.944333	0.22
Acad12	chr5	-	121604253	121604426	121599888	121600032	121605542	121605701	1	NA	1	NA	0.765333	1	1	1	NA	NA	1	NA	0.852333	0.852333	NA	1	1	1	NA	1	0.234667
Acad12	chr5	-	121609765	121610166	121607895	121608036	121614059	121614259	1	1	0.901333	1	1	1	1	0.752333	1	1	1	0.930667	1	1	1	0.793333	NA	1	1	0.972667	0.247667
Acad8	chr9	-	26992159	26992288	26990119	26990196	26999393	26999506	0.954667	1	1	0.899	1	1	1	NA	1	1	0.969333	1	0.983333	NA	1	NA	1	NA	1	1	0.101
Acan	chr7	+	79108114	79108228	79099750	79101234	79111293	79111452	NA	NA	NA	NA	NA	NA	NA	0.559	NA	0.428333	NA	NA	NA	0.575	NA	0.552	NA	0.654	NA	0.666667	0.238333
Acap1	chr11	-	69889819	69889864	69889617	69889713	69889998	69890331	NA	NA	NA	NA	NA	NA	NA	NA	NA	NA	1	NA	NA	NA	NA	NA	0.896	NA	NA	NA	0.104
Acap3	chr4	+	155895491	155895576	155891901	155892441	155896110	155896168	0.0606667	0.0893333	0.0196667	0.121667	0.0316667	0.056	0.0246667	0.055	0.028	0.0556667	0.0563333	0.0353333	0.042	0.0176667	0.0276667	0.0213333	0.077	0.009	0.0303333	0.034	0.112667
Acap3	chr4	+	155901003	155901015	155900286	155900361	155901674	155901787	1	1	1	1	1	NA	1	0.934667	0.771	0.955	0.928333	1	1	1	1	1	1	0.985	0.952	0.985333	0.229
Acat2	chr17	-	12952251	12952369	12947356	12947479	12959994	12960129	1	NA	NA	NA	NA	0.835667	NA	0.559333	0.666667	1	NA	0.726667	NA	1	NA	NA	NA	NA	NA	NA	0.440667
Acat2	chr17	-	12952251	12952369	12947356	12947479	12959994	12960371	NA	NA	NA	1	NA	NA	NA	0.559333	0.666667	1	NA	0.726667	NA	1	NA	0.333333	NA	NA	NA	NA	0.666667
Acbd3	chr1	+	180745070	180745257	180736691	180736850	180752158	180754204	1	NA	NA	NA	0.833333	NA	0.848667	NA	1	NA	1	NA	NA	NA	NA	NA	NA	NA	NA	NA	0.166667
Acbd4	chr11	+	103102681	103103096	103101687	103101788	103103525	103103644	NA	NA	NA	NA	NA	NA	NA	NA	NA	NA	1	NA	1	NA	1	NA	0.887667	1	NA	NA	0.112333
Acbd4	chr11	+	103103234	103103369	103103020	103103096	103103525	103103644	0.894	0.902	0.833	0.806333	0.688	0.512	0.918333	0.868667	0.869333	0.84	0.843667	0.723	0.861	0.868667	0.732	0.662	0.749	0.826	0.850667	0.842	0.406333
Acbd4	chr11	+	103103234	103103369	103103038	103103145	103103525	103103644	0.763667	0.798	0.773	0.625333	0.744667	NA	0.660333	0.703333	0.747	0.609667	0.652667	0.847667	0.696333	0.582333	0.640333	0.479333	0.632333	0.518667	0.688667	0.58	0.368333
Acbd4	chr11	+	103103899	103104020	103103525	103103644	103104092	103104172	0.436667	0.712333	0.689333	0.532333	0.559	0.745333	0.547667	0.634333	0.634667	0.463667	0.597333	0.624	0.597333	0.682667	0.587333	0.607333	0.506333	0.692333	0.571	0.629333	0.308667
Acbd5	chr2	+	23075489	23075610	23069326	23069619	23078143	23078216	0.870333	NA	0.871667	NA	0.861333	0.847	NA	0.861	NA	0.891333	0.915	0.837667	0.900333	0.773333	NA	0.84	0.905	0.865333	0.873667	0.877	0.141667
Acbd5	chr2	+	23075489	23075610	23069450	23069619	23078143	23078216	0.870333	0.886333	0.871667	0.85	NA	0.847	0.907	0.861	0.895	0.891333	0.915	0.837667	0.900333	0.773333	0.918667	0.84	0.905	0.865333	0.873667	NA	0.145333
Accs	chr2	-	93838010	93838152	93836187	93836330	93838239	93838285	0.795333	0.956667	0.875	0.88	0.901667	0.917	0.853333	0.896667	0.831	0.892333	0.850667	0.88	0.896333	0.883333	0.827333	0.89	0.864667	0.856333	0.872667	0.858	0.161333
Accs	chr2	-	93841308	93841386	93840022	93840123	93842918	93842988	1	1	NA	0.915	0.966333	1	NA	1	1	1	1	0.973667	1	1	0.946667	1	1	0.847667	1	0.979	0.152333
Accs	chr2	-	93842548	93842615	93841864	93841962	93842918	93842988	0.451333	0.506667	0.386	0.394667	0.485333	0.632333	0.517667	0.530333	0.468	0.498667	0.466	0.616333	0.47	0.408	0.366667	0.463	0.485667	0.402	0.562333	0.479667	0.265667
Ace	chr11	+	105985044	105985268	105981767	105981940	105985572	105985717	0.927333	1	1	NA	1	0.863	1	1	0.863	NA	1	1	1	0.913667	1	1	NA	1	0.962333	1	0.137
Acer2	chr4	+	86900481	86900619	86887023	86887165	86911615	86911753	1	NA	0.893667	1	0.747	NA	0.942	0.93	0.896333	0.885	1	0.814333	0.873333	0.919667	0.871333	0.873	0.845	0.885333	0.884667	0.932667	0.253
Acer2	chr4	+	86900481	86900619	86887023	86887165	86917393	86920875	NA	NA	NA	NA	NA	NA	NA	NA	NA	0.805333	NA	NA	NA	NA	NA	1	NA	NA	NA	NA	0.194667
Acer2	chr4	+	86900481	86900619	86887023	86887165	86932031	86932491	NA	NA	NA	0.730333	1	NA	0.901333	0.862667	0.959	1	0.942	0.886	1	1	0.913333	1	0.774	0.910667	NA	NA	0.269667
Acer2	chr4	+	86911615	86911753	86887023	86887165	86932031	86932491	NA	NA	NA	NA	1	NA	0.774	0.774	0.666667	1	NA	0.529333	1	1	0.885	1	0.785667	0.858	0.930667	NA	0.470667
Acer2	chr4	+	86911615	86911753	86900481	86900619	86932031	86932491	1	NA	1	1	0.862667	NA	1	1	1	1	1	0.956333	0.680667	0.839	0.965	0.86	1	0.972	NA	1	0.319333
Acer3	chr7	-	98230449	98230613	98226398	98226500	98251889	98251925	0.666667	NA	NA	0.666667	NA	NA	0.855	0.642667	NA	0.392667	0.855	NA	0.767333	NA	1	0.565	NA	NA	1	NA	0.607333
Acer3	chr7	-	98230449	98230613	98226398	98226500	98257695	98257777	NA	NA	NA	NA	NA	NA	NA	0.878	NA	NA	1	0.434	NA	NA	NA	NA	NA	0.408	NA	NA	0.592
Acer3	chr7	-	98243948	98244007	98230449	98230613	98251889	98251925	0.978	1	1	1	1	0.858667	0.972	1	1	1	1	0.948	1	1	1	0.962333	1	0.973333	1	NA	0.141333
Acer3	chr7	-	98251889	98251925	98226398	98226500	98257695	98257777	NA	NA	NA	NA	NA	NA	1	0.977667	NA	1	1	0.894667	NA	1	NA	1	NA	0.842333	1	NA	0.157667
Acer3	chr7	-	98257695	98257777	98243948	98244007	98261586	98261639	NA	NA	NA	NA	NA	NA	NA	0.625333	NA	1	NA	1	NA	1	NA	NA	NA	NA	1	NA	0.374667
Acer3	chr7	-	98259404	98259457	98257695	98257777	98261586	98261639	0.993333	0.763667	0.984333	0.977	1	0.959	0.994333	0.934667	0.990667	0.934667	0.979667	0.927333	0.978	0.910333	0.991333	0.912333	1	0.931667	0.99	0.987667	0.236333
Acer3	chr7	-	98259404	98259457	98257695	98257777	98266136	98266247	NA	NA	NA	NA	NA	NA	NA	NA	NA	NA	NA	0.936333	NA	1	NA	0.936	1	0.831333	NA	NA	0.168667
Acer3	chr7	-	98261586	98261639	98257695	98257777	98266136	98266247	NA	1	1	0.943667	NA	1	NA	1	NA	1	1	0.965	NA	1	1	0.961667	1	0.882333	NA	NA	0.117667
Ache	chr5	+	137290011	137291101	137288282	137288367	137293167	137293337	NA	NA	NA	NA	NA	NA	NA	NA	NA	NA	NA	NA	NA	0.683	NA	NA	NA	1	NA	1	0.317
Ache	chr5	+	137291478	137291963	137290011	137291101	137293167	137293337	0.903667	1	NA	NA	1	NA	1	1	NA	NA	NA	1	1	1	1	1	0.723333	0.922	0.983	0.946667	0.276667
Ache	chr5	+	137291742	137291963	137290011	137291101	137293167	137293337	0.933	1	NA	NA	1	NA	1	1	NA	NA	NA	1	1	1	1	1	0.666667	0.945	0.985667	0.965	0.333333
Acin1	chr14	-	54646702	54646833	54645604	54645743	54651716	54651858	NA	NA	NA	NA	NA	NA	1	NA	NA	NA	NA	NA	1	0.807667	NA	1	NA	NA	NA	1	0.192333
Acin1	chr14	-	54653213	54653278	54651716	54651858	54653534	54653682	0.552333	0.558333	0.557667	0.604	0.578333	0.569333	0.417	0.459667	0.464667	0.491667	0.472667	0.462333	0.538	0.532	0.543333	0.516	0.505	0.532333	0.447333	0.515	0.187
Acin1	chr14	-	54653213	54653278	54651716	54651858	54653679	54653701	0.893	0.807667	0.87	0.845667	0.874	0.824667	0.922333	0.91	0.944667	0.871667	0.935	0.901667	0.937333	0.871333	0.919333	0.824333	0.915667	0.848333	0.919	0.888333	0.137
Acin1	chr14	-	54653213	54653317	54651514	54651858	54653534	54653681	0.478	0.451333	0.506	0.540667	0.483	0.483667	0.370667	NA	0.409	0.387333	0.396667	0.378333	0.460333	NA	NA	NA	0.442333	0.426667	0.383333	0.469	0.17
Acin1	chr14	-	54653213	54653317	54651514	54651858	54653679	54653691	0.908	0.822333	0.891	0.861333	0.891333	0.844	0.931667	NA	0.948333	0.877	0.941333	0.908	0.959	NA	NA	NA	0.935667	0.873333	0.923667	0.914333	0.136667
Acin1	chr14	-	54653213	54653317	54651716	54651858	54653534	54653681	NA	0.451333	NA	NA	NA	NA	0.370667	0.379333	0.409	0.387333	NA	0.378333	0.460333	0.419	0.489	0.423667	0.442333	0.426667	0.383333	0.469	0.118333
Acin1	chr14	-	54653213	54653317	54651716	54651858	54653679	54653691	NA	0.822333	NA	NA	NA	NA	0.931667	0.913333	0.948333	0.877	NA	0.908	0.959	0.900667	0.942	0.863667	0.935667	0.873333	0.923667	0.914333	0.136667
Acin1	chr14	-	54678742	54678862	54667072	54667161	54679240	54679352	0.362333	0.403	0.404333	0.319667	0.430667	0.319333	0.414	0.398667	0.366667	0.368	0.398	0.367	0.384333	0.363	0.402	0.365333	0.398333	0.351	0.346333	0.375	0.111333
Acly	chr11	-	100503159	100503189	100498620	100498762	100504202	100504293	0.612	0.474667	0.577667	0.465667	0.589333	0.466333	0.595	0.304	0.587667	0.312333	0.597333	0.282	0.638	0.298	0.654333	0.286667	0.648667	0.307	0.562	0.636667	0.372333
Acnat1	chr4	-	49458719	49458849	49450965	49451134	49473417	49473522	0.943667	NA	1	NA	NA	NA	1	NA	NA	NA	NA	NA	1	NA	NA	NA	NA	NA	0.785667	0.703333	0.296667
Acnat1	chr4	-	49458719	49458849	49450965	49451134	49473782	49473912	0.519333	NA	1	NA	NA	NA	1	NA	NA	NA	NA	NA	1	NA	NA	NA	NA	NA	0.938333	0.820667	0.480667
Acnat1	chr4	-	49473417	49473522	49450965	49451134	49473782	49473912	0.117333	NA	NA	NA	NA	NA	NA	NA	NA	NA	NA	NA	NA	NA	NA	NA	NA	NA	0.784	NA	0.666667
Aco2	chr15	+	81895169	81895428	81872308	81872548	81903475	81903634	1	NA	NA	NA	NA	NA	1	1	1	NA	0.844333	1	NA	NA	NA	1	NA	0.855333	0.873	0.798	0.202
Aco2	chr15	+	81909841	81909915	81907425	81907531	81911885	81912008	NA	NA	NA	NA	NA	NA	NA	NA	NA	0.265333	NA	NA	NA	0.651333	NA	0.443	NA	0.733333	NA	NA	0.468
Acot11	chr4	-	106752826	106752957	106749882	106750014	106753713	106753797	NA	NA	NA	NA	NA	NA	NA	1	NA	1	1	0.831333	NA	NA	NA	NA	NA	1	NA	NA	0.168667
Acot11	chr4	-	106770703	106770773	106763393	106763454	106771342	106771556	NA	NA	NA	0.920667	NA	1	NA	1	NA	1	1	0.886	1	0.654	NA	1	NA	1	NA	NA	0.346
Acot6	chr12	+	84106442	84106645	84100653	84101428	84108939	84111349	1	NA	0.666667	1	1	NA	NA	NA	1	NA	NA	1	NA	1	NA	1	1	0.944	NA	NA	0.333333
Acot8	chr2	-	164802996	164803133	164799719	164799945	164804689	164804882	0.72	0.644	0.68	0.71	0.708667	0.435	0.764667	0.519667	0.622667	0.608333	0.715333	0.572	0.629667	0.499	0.572333	0.543333	0.726333	0.384	0.681	0.582667	0.380667
Acox1	chr11	-	116181912	116182020	116180290	116180406	116198221	116198381	NA	NA	NA	NA	NA	NA	NA	1	NA	NA	NA	NA	NA	NA	NA	NA	NA	NA	0.717333	NA	0.282667
Acox1	chr11	-	116183463	116183624	116181912	116182020	116189414	116189575	0.963667	0.972667	0.895333	0.934333	0.981667	0.957333	0.925667	0.992	0.927	0.962	0.97	0.947	0.874667	0.923	0.909	0.912667	0.911333	0.942333	0.955	0.920667	0.117333
Acox1	chr11	-	116189414	116189575	116181912	116182020	116198221	116198381	0.836667	NA	0.902	0.838	1	0.465	0.924667	0.95	0.967333	0.862333	0.818667	0.842667	0.956	0.547	0.932333	0.548	0.694	0.709333	0.848667	0.819	0.535
Acox3	chr5	+	35598314	35598411	35594309	35594398	35599691	35599874	0.97	0.858	0.914333	0.883333	0.886333	0.913667	0.961667	0.849333	0.925	0.872333	0.877667	0.853	0.879	0.868	0.962	0.873	0.956333	0.852	0.899667	0.902	0.120667
Acoxl	chr2	+	128086358	128086429	128075846	128075934	128105676	128105778	NA	NA	NA	NA	NA	NA	NA	0.796333	NA	1	NA	NA	NA	NA	NA	NA	NA	NA	NA	NA	0.203667
Acoxl	chr2	+	128105676	128105778	128086358	128086429	128122947	128123873	NA	NA	NA	0.896	NA	NA	NA	NA	NA	1	NA	NA	NA	NA	NA	NA	NA	NA	NA	NA	0.104
Acrbp	chr6	+	125062435	125062519	125061085	125061253	125062935	125063267	0.591667	0.666667	0.57	1	0.754333	0.397667	0.559667	0.454667	0.676333	0.918	0.593667	0.760333	0.947667	0.743333	0.698	0.927333	0.799	NA	0.578333	0.816	0.602333
Acsf2	chr11	-	94570302	94570460	94569940	94570032	94570613	94570709	0.945333	0.880667	0.953333	0.875333	0.933667	0.629	0.957333	0.926	0.973	0.898333	0.978	0.917	0.957	0.914333	0.960667	0.890667	0.942	0.912	0.952	0.92	0.349
Acsf3	chr8	+	122778076	122778223	122775519	122775590	122779945	122780635	0.105333	0.083	0.0893333	0.049	0.216667	NA	0.0276667	0.113667	0.0456667	0.0783333	0.0546667	0.046	0.0116667	0.0206667	0.0236667	0.0206667	0.0386667	0.0113333	0.0353333	0.0153333	0.205333
Acsf3	chr8	+	122785818	122785964	122783946	122784101	122790589	122790699	0.937667	0.874333	0.868	0.925333	0.924333	0.846	0.948	0.914333	0.879333	0.932667	0.937	0.907667	0.899667	0.837667	0.875	0.851	0.886333	0.876	0.952333	0.936667	0.114667
Acsl1	chr8	+	46471872	46472049	46471176	46471230	46492799	46493026	0.0236667	0.024	0	0.0233333	0.092	0.0596667	0.025	0.007	0.0463333	0.009	0.0476667	0.126	0.0246667	0.0326667	0.0163333	0.0146667	0.0126667	0.0296667	0.0486667	0.0233333	0.126
Acsl1	chr8	+	46492799	46493026	46471036	46471230	46505648	46505766	0.96	0.933	1	1	0.834	0.96	1	0.904667	1	0.846333	0.983667	0.943333	0.983	0.928	1	0.927667	0.929667	0.942667	0.985667	0.974667	0.166
Acsl3	chr1	+	78663140	78663280	78657824	78658103	78681592	78682010	0.352	0.412	0.440333	0.438333	0.400667	0.494	0.429333	0.461667	0.469	0.449667	0.47	0.401	0.367667	0.346	0.392333	0.351333	0.380333	0.34	0.404	0.345667	0.154
Acsl4	chrX	-	142360386	142360484	142351378	142351908	142390304	142390344	1	NA	0.959667	0.936	0.974	1	1	NA	1	1	0.861333	1	NA	NA	NA	NA	1	NA	NA	NA	0.138667
Acsl6	chr11	+	54320151	54320372	54303797	54303922	54323240	54323355	NA	1	1	0.84	NA	1	NA	NA	NA	1	NA	NA	NA	NA	NA	NA	NA	NA	NA	NA	0.16
Acsl6	chr11	+	54336935	54337013	54335051	54335125	54338411	54338546	0.552333	NA	NA	0.666667	0.666667	NA	NA	0.511	0.666667	0.663333	0.883	0.863333	NA	1	NA	NA	NA	0.614333	0.682667	0.814667	0.489
Acsl6	chr11	+	54337070	54337148	54335051	54335125	54338411	54338546	0.781667	NA	0.762333	0.937333	0.850667	NA	0.836667	0.769667	0.894333	0.83	0.937333	0.863333	1	1	1	NA	0.918333	NA	0.83	0.833333	0.237667
Acss1	chr2	-	150659835	150659932	150642711	150642911	150667884	150668258	NA	1	NA	1	NA	NA	1	0.977	1	0.988	NA	1	1	0.989667	NA	1	NA	1	0.861667	1	0.138333
Acss2	chr2	+	155556332	155556503	155555853	155555991	155556777	155556911	0.943333	0.98	1	0.935667	0.971	1	0.920667	0.941667	0.942333	0.919667	1	0.956667	0.932333	0.96	0.908667	0.928667	0.897	0.943	0.964667	0.942	0.103
Acss3	chr10	-	107023856	107023937	107004663	107004815	107045212	107045353	1	NA	NA	NA	0.962333	NA	NA	0.884	1	0.855667	0.936333	0.840333	1	0.819333	NA	1	1	0.810667	0.986667	0.928333	0.189333
Actg1	chr11	-	120347491	120347536	120346910	120347349	120347635	120347875	0.505333	0.777	0.211667	0.620333	0.313333	0.786667	0.0473333	0.564667	0.0966667	0.661333	0.078	0.562	0.0893333	0.777667	0.198333	0.630333	0.159667	0.724	0.226667	0.138667	0.739333
Actg1	chr11	-	120347968	120348097	120347862	120347875	120348424	120348475	0.938333	0.951667	1	0.977	0.948667	0.971333	0.974667	0.947333	0.946333	0.989333	0.956333	0.974667	0.973	0.972	0.973667	0.956667	0.891333	0.940667	0.946	0.938667	0.108667
Actl6b	chr5	+	137554063	137554140	137553519	137553659	137563106	137563204	0.551	NA	NA	NA	NA	NA	NA	NA	NA	NA	NA	NA	NA	NA	NA	NA	NA	NA	0.296	0.138333	0.412667
Actl6b	chr5	+	137554063	137554140	137553554	137553783	137563106	137563204	NA	NA	NA	NA	NA	NA	NA	NA	NA	NA	NA	NA	NA	NA	NA	NA	NA	NA	0.210333	0.0366667	0.173667
Actl6b	chr5	+	137554512	137554678	137553554	137553783	137563106	137563204	NA	NA	NA	NA	NA	NA	NA	NA	NA	NA	NA	NA	NA	NA	NA	NA	NA	NA	0.154	0.0223333	0.131667
Actl6b	chr5	+	137554512	137554678	137554063	137554140	137563106	137563204	NA	NA	NA	NA	NA	NA	NA	NA	NA	NA	NA	NA	NA	NA	NA	NA	NA	NA	0.205	0.854333	0.649333
Actn2	chr13	-	12296474	12296560	12294309	12294402	12300934	12301016	0	NA	0	0.180667	NA	NA	0.043	0.457333	0.098	0.861667	0.200333	0.381	0.180667	NA	0	0.813667	0.119333	0.0763333	0	NA	0.861667
Actn2	chr13	-	12300934	12301016	12294309	12294402	12306273	12306361	NA	NA	NA	NA	NA	NA	1	NA	NA	NA	NA	NA	0.744	NA	1	NA	1	NA	NA	NA	0.256
Actn2	chr13	-	12304313	12304392	12300934	12301016	12306273	12306361	0.0656667	0.0443333	0	0.0566667	0.126667	1	0	NA	0	0.810333	0.333333	0.561333	NA	0.666667	NA	0.994	0.0363333	NA	0.333333	NA	1
Actn2	chr13	-	12306273	12306361	12300934	12301016	12308899	12308986	1	NA	0.846667	1	0.900333	1	1	NA	0.958667	1	0.865	1	NA	NA	NA	1	1	NA	NA	NA	0.153333
Actn4	chr7	-	28909902	28909988	28906971	28907064	28912239	28912321	0.994333	0.982	0.99	0.993333	1	0.968	1	0.995333	0.967333	0.967	0.992333	0.975	1	0.880333	0.975333	0.984333	0.924667	0.957667	0.996667	0.964667	0.119667
Actr2	chr11	-	20080661	20080798	20077187	20077333	20094229	20094445	NA	NA	NA	0.666667	NA	NA	NA	NA	NA	NA	NA	NA	1	NA	NA	1	NA	1	NA	0.923333	0.333333
Actr3	chr1	-	125397106	125397232	125393483	125394090	125403392	125403566	NA	NA	NA	NA	NA	NA	NA	NA	NA	1	NA	NA	NA	NA	NA	0.499667	NA	NA	NA	0.666667	0.500333
Actr3	chr1	-	125403392	125403566	125395067	125395151	125416255	125416380	NA	1	NA	NA	NA	NA	0.837	0.818333	0.923333	1	NA	1	NA	1	1	NA	NA	NA	1	NA	0.181667
Actr3	chr1	-	125416255	125416380	125397451	125397544	125435284	125435454	NA	NA	NA	NA	NA	NA	NA	NA	NA	NA	NA	0.666667	NA	NA	NA	NA	NA	1	NA	NA	0.333333
Actr3b	chr5	+	25798445	25798501	25760025	25760128	25809784	25809909	0.797333	0.619333	0.882	0.949	0.935333	0.469333	0.932	0.796	0.826333	0.771333	0.806667	0.930667	0.771667	0.773667	0.964	0.662667	0.729333	0.532667	0.777	0.772667	0.494667
Actr3b	chr5	+	25829525	25829669	25825107	25825215	25831610	25831784	0.823667	0.937333	0.831333	0.867667	0.881	0.966333	0.922667	0.792333	0.792	0.780667	0.907667	0.921667	0.967667	0.932667	0.918667	0.915667	0.917	0.945333	0.903333	0.931333	0.187
Actr3b	chr5	+	25848361	25848487	25832385	25832478	25849850	25850342	1	NA	0.968	1	0.851667	NA	NA	1	1	NA	1	NA	1	0.916333	0.777333	1	0.904333	1	NA	1	0.222667
Actr3b	chr5	+	25849072	25849156	25848361	25848487	25849850	25850342	0.959667	1	0.866333	0.927333	1	0.916333	0.921	0.944667	0.913333	0.964333	0.927667	0.947667	1	0.952333	0.901667	0.868667	1	0.859	0.963333	0.99	0.141
Actr5	chr2	+	158634844	158634915	158634546	158634747	158635306	158635426	NA	NA	NA	NA	NA	NA	NA	NA	NA	NA	NA	0.187	NA	NA	NA	NA	NA	0.333333	0	0.0993333	0.333333
Acvr1	chr2	-	58507276	58507521	58500483	58500557	58516023	58516300	0.108333	0.439	0.107	0.082	0.092	0.125333	0.066	0.094	0.056	0.0766667	0.0656667	0.0846667	0.0623333	0.0833333	0.163667	0.0776667	0.092	0.0693333	0.0853333	0.0746667	0.383
Acvr1	chr2	-	58516023	58516300	58479664	58479928	58537777	58537873	1	1	NA	1	1	0.764333	0.915667	0.966667	1	1	0.865333	0.884667	1	1	0.869667	1	1	0.794333	0.858667	1	0.235667
Acvr1	chr2	-	58516023	58516300	58507276	58507521	58537777	58537873	0.895	0.904333	0.829	0.518333	0.781333	1	0.810667	0.832667	0.82	0.770333	0.880333	0.829	1	0.874333	0.929667	0.773333	0.869667	0.753333	0.829667	0.824	0.481667
Acvr1c	chr2	-	58295925	58296165	58287680	58287911	58315792	58316023	0.859333	NA	NA	NA	NA	NA	NA	NA	NA	NA	NA	NA	NA	NA	NA	0.666667	NA	1	0.759667	NA	0.333333
Acvrl1	chr15	+	101131342	101131471	101128926	101129063	101134675	101134694	NA	NA	NA	0.11	NA	0.0366667	NA	NA	NA	0	NA	0	NA	NA	NA	NA	NA	NA	NA	NA	0.11
Acvrl1	chr15	+	101134606	101134743	101128926	101129063	101135297	101135543	NA	NA	NA	NA	NA	1	NA	1	0.829333	1	1	0.974667	NA	NA	NA	NA	NA	1	NA	NA	0.170667
Acvrl1	chr15	+	101134644	101134743	101128926	101129063	101135297	101135543	NA	NA	NA	NA	NA	1	NA	1	0.875333	1	1	0.979667	NA	NA	1	NA	NA	1	NA	NA	0.124667
Acvrl1	chr15	+	101134675	101134743	101128921	101129063	101135297	101135462	NA	NA	NA	NA	NA	NA	1	NA	0.797667	1	NA	NA	NA	NA	NA	NA	NA	NA	NA	NA	0.202333
Acvrl1	chr15	+	101136127	101136227	101135748	101135960	101137363	101137639	NA	NA	NA	NA	NA	NA	NA	NA	NA	NA	1	NA	1	NA	1	NA	0.842	1	NA	NA	0.158
Acvrl1	chr15	+	101136983	101137130	101136127	101136227	101137363	101137639	1	0.968667	1	0.958333	1	0.982	1	0.926	0.729	0.927667	0.86	0.943667	0.949	0.950667	1	0.981	0.911333	0.972	1	0.921	0.271
Acy1	chr9	-	106436888	106436953	106436125	106436220	106437628	106437733	NA	0.987333	0.935	NA	1	1	0.949667	0.949667	0.976667	0.973667	0.993667	0.942333	0.929	0.929	0.948	0.929667	0.902	0.888667	1	1	0.111333
Ada	chr2	-	163730011	163730076	163728116	163728246	163730297	163730399	0.968333	0.883667	0.968	0.945667	0.988333	0.971333	0.941333	0.943333	0.981333	0.952333	0.938	0.947333	0.965667	0.856	0.922333	0.904667	0.936	0.902667	0.956333	0.934333	0.132333
Adad1	chr3	+	37083182	37083353	37079787	37079911	37091859	37092097	NA	NA	NA	NA	NA	NA	NA	0.490333	0.714	NA	NA	NA	NA	NA	NA	0.438	NA	NA	NA	NA	0.276
Adad1	chr3	+	37084927	37085157	37083182	37083353	37091859	37092097	NA	NA	NA	NA	NA	NA	1	NA	NA	NA	NA	NA	NA	NA	NA	NA	NA	NA	0.879333	NA	0.120667
Adad1	chr3	+	37084927	37085157	37083215	37083353	37091859	37092097	1	NA	NA	NA	NA	NA	NA	1	1	NA	NA	NA	1	NA	0.947	1	1	NA	0.879333	1	0.120667
Adal	chr2	+	121142523	121142654	121142092	121142303	121143148	121143209	0.866667	0.854	0.779667	0.791333	0.871667	0.828667	0.837333	0.688667	0.776667	0.718	0.776	0.729333	0.822333	0.781667	0.861333	0.815	0.826333	0.827	0.758667	0.843667	0.183
Adal	chr2	+	121142523	121142654	121142092	121142303	121143148	121145514	0.866667	0.854	0.779667	0.791333	NA	0.828667	NA	NA	NA	NA	NA	0.729333	NA	NA	0.861333	NA	0.826333	NA	NA	NA	0.137333
Adal	chr2	+	121148240	121148322	121146032	121146120	121150219	121150346	0.923	0.932	0.907667	0.924667	0.978	0.976333	0.903667	0.920333	0.899333	0.891	0.876333	0.930667	0.918667	0.886333	0.860333	0.855667	0.85	0.877667	0.938	0.956333	0.128
Adam11	chr11	+	102776987	102777078	102776788	102776903	102777630	102777648	0.875333	0.904667	0.836	0.86	0.756333	0.825	0.857667	0.895	0.843333	0.839	0.834667	0.868667	0.877333	0.893333	0.790333	0.9	0.762	0.869	0.844333	0.860667	0.148333
Adam12	chr7	-	133919503	133919702	133916411	133916489	133919806	133919915	NA	1	NA	NA	1	NA	NA	0.963333	NA	1	0.812	1	0.91	0.973	NA	0.958667	1	0.986333	1	1	0.188
Adam15	chr3	-	89340400	89340472	89340054	89340179	89341507	89341577	0.468667	0.211667	0.274	0.265333	0.325667	0.355	0.393333	0.172333	0.269333	0.260333	0.329333	0.260333	0.211667	0.149667	0.263667	0.165667	0.256333	0.138	0.469667	0.416333	0.331667
Adam15	chr3	-	89340862	89340937	89340054	89340179	89341507	89341577	0.430333	0.0376667	0.114333	NA	0.185667	0.176667	0.183667	0.0773333	0.154	0.0773333	0.156667	0.0706667	0.112	0.0553333	0.123333	0.03	0.133667	0.0236667	0.252667	0.285333	0.406667
Adam15	chr3	-	89340862	89340937	89340400	89340472	89341507	89341577	0.777	0.453667	0.589333	0.605333	0.805333	0.499	0.600667	0.634333	0.770667	0.678333	0.765	0.644667	0.746	0.628333	0.765	0.539	0.682333	0.470667	0.807667	0.835	0.381333
Adam15	chr3	-	89347406	89347485	89347151	89347228	89348517	89348627	0.957	NA	NA	NA	0.899667	NA	0.944	0.984667	1	NA	0.945	0.978667	1	1	NA	NA	1	NA	0.976333	0.908667	0.100333
Adam15	chr3	-	89347868	89347945	89346876	89347066	89348517	89348627	0.883333	NA	0.974	NA	NA	NA	1	NA	1	0.963333	0.975	NA	0.972667	1	1	0.986333	1	0.975	1	1	0.116667
Adam17	chr12	-	21347296	21347449	21342863	21342977	21349784	21349953	0.870333	0.968	0.798333	0.734	0.919667	0.629667	0.757333	0.754	0.79	0.840333	0.809333	0.626	0.923667	0.862333	0.766	0.875	1	0.923	0.787667	0.820333	0.374
Adam19	chr11	+	46112756	46112949	46099852	46099929	46113622	46113688	1	1	0.983333	0.996333	1	1	0.957667	0.988667	1	0.976	0.986667	0.993667	1	0.985	0.870333	0.989	1	0.996333	1	1	0.129667
Adam22	chr5	-	8086593	8086623	8082142	8082269	8090141	8090252	NA	NA	NA	NA	NA	NA	0	NA	NA	NA	NA	NA	0	NA	NA	0	NA	NA	0.219333	NA	0.219333
Adam22	chr5	-	8087981	8088068	8082142	8082269	8090141	8090252	NA	NA	0.457	0	0.823	NA	0	0.557	NA	0.525667	0.637333	0.694	0.0546667	0.390333	NA	0.345	0.533	0.272333	0.267667	NA	0.823
Adam22	chr5	-	8087981	8088068	8082142	8082269	8092339	8092406	0.0183333	0.0486667	0.03	0.106	0.071	NA	0.0623333	0.0923333	0.0236667	0.0793333	0.0796667	0.0516667	0.019	0.122333	0	0.103333	0.039	0.0936667	0.039	0.0266667	0.122333
Adam22	chr5	-	8087981	8088068	8086593	8086623	8092339	8092406	NA	NA	NA	NA	NA	NA	NA	1	NA	NA	NA	NA	NA	0.790333	NA	1	NA	NA	NA	NA	0.209667
Adam22	chr5	-	8090141	8090252	8082142	8082269	8092339	8092406	0.0233333	0.0186667	0.0326667	0.0803333	0.013	NA	0.0526667	0.075	0.0566667	0.0463333	0.0316667	0.0383333	0.0543333	0.104	0.0426667	0.125667	0.0233333	0.0996667	0.0426667	0.0143333	0.112667
Adam22	chr5	-	8090141	8090252	8086593	8086623	8092339	8092406	NA	NA	NA	NA	NA	NA	NA	1	NA	NA	NA	NA	1	0.782	NA	1	NA	NA	NA	NA	0.218
Adam22	chr5	-	8090141	8090252	8087981	8088068	8092339	8092406	0.333333	NA	0.538	0.115333	NA	NA	NA	0.389667	0.448667	0.32	0.273	0.574333	0.564	0.303333	NA	0.353	NA	0.403	0.403	NA	0.459
Adam22	chr5	-	8094985	8095047	8092730	8092831	8107001	8107019	0	NA	NA	NA	0	NA	0.300667	0	0.0896667	0.0606667	0	NA	NA	0.0606667	0	0	NA	0	0.0726667	0	0.300667
Adam22	chr5	-	8094985	8095180	8092730	8092831	8107001	8107019	0	NA	NA	NA	0.0936667	NA	0.24	0.0383333	0.239667	0.202333	0.0936667	NA	NA	0.093	0	0.0383333	NA	0.0406667	0.117667	0.269333	0.269333
Adam22	chr5	-	8095072	8095180	8092730	8092831	8107001	8107019	0	NA	NA	NA	0	NA	0.0706667	0.0506667	0.121333	0	0.116333	NA	NA	0.127	0	0	NA	0.0186667	0.0863333	0.232667	0.232667
Adam22	chr5	-	8107001	8107019	8092730	8092831	8111894	8111985	0.134	0.135	0.226333	0.233667	0.245	0.183	0.266333	0.176	0.150333	0.143667	0.0943333	0.127667	0.145	0.118667	0.184333	0.128333	0.152	0.241	0.128	0.0893333	0.177
Adam22	chr5	-	8107001	8107019	8095072	8095180	8111894	8111985	NA	NA	NA	NA	1	NA	0.666667	NA	NA	NA	NA	NA	NA	NA	1	NA	NA	0.878667	1	NA	0.333333
Adam22	chr5	-	8111894	8111985	8092730	8092831	8116544	8116605	0.953667	1	0.923667	0.744667	0.922333	0.934	0.865	0.841	0.922	0.879667	0.923667	0.895667	0.971667	0.916	0.975333	0.944	0.927667	0.956333	0.979333	1	0.255333
Adam23	chr1	+	63581136	63581227	63572886	63572998	63592607	63596276	0.165333	NA	NA	0	0.247667	0.054	NA	0.0223333	NA	0.0243333	0.130667	0.056	NA	0.211667	NA	0.0343333	NA	0.0483333	0.115667	0.215	0.247667
Adam23	chr1	+	63585364	63585455	63572886	63572998	63592607	63596276	0.433333	0.668333	0.613	0.53	0.518333	0.440333	NA	0.566333	0.721	0.588333	0.381333	0.503667	NA	0.846667	NA	0.740667	NA	0.66	0.433333	0.342333	0.504333
Adam28	chr14	-	68617691	68617770	68610897	68611006	68618094	68618175	1	NA	0.676	NA	1	NA	NA	NA	1	NA	NA	NA	NA	NA	NA	NA	NA	NA	1	0.928	0.324
Adam28	chr14	-	68622083	68622186	68619716	68619876	68626776	68626972	NA	NA	1	NA	NA	NA	NA	NA	0.841	NA	NA	NA	NA	NA	1	NA	NA	NA	NA	NA	0.159
Adam32	chr8	-	24864346	24864452	24863388	24863545	24870685	24870769	NA	NA	NA	NA	NA	NA	NA	NA	NA	NA	NA	NA	NA	0.84	NA	NA	NA	NA	NA	0.666667	0.173333
Adam32	chr8	-	24878720	24878829	24872571	24872761	24884437	24884636	NA	NA	NA	NA	NA	NA	NA	NA	NA	NA	NA	NA	NA	NA	1	0.333333	NA	NA	NA	NA	0.666667
Adam32	chr8	-	24898453	24898631	24886220	24886325	24901441	24901578	NA	1	NA	NA	NA	NA	NA	NA	NA	1	NA	1	NA	1	NA	NA	NA	0.851	NA	NA	0.149
Adam32	chr8	-	24914318	24914390	24913958	24914125	24916287	24916356	NA	NA	NA	0.853	NA	NA	NA	NA	NA	NA	NA	0.333333	NA	0.325	0.129333	NA	NA	NA	NA	NA	0.723667
Adam33	chr2	-	131053222	131053300	131053041	131053150	131053389	131053588	NA	NA	NA	NA	NA	NA	NA	0.953333	NA	1	NA	1	NA	0.937333	NA	0.773	NA	0.847667	NA	NA	0.227
Adam33	chr2	-	131053222	131053318	131053041	131053150	131053389	131053588	NA	NA	NA	NA	NA	NA	NA	0.95	NA	NA	NA	1	NA	0.928667	NA	0.767667	NA	0.816	NA	NA	0.232333
Adam33	chr2	-	131053917	131054361	131053684	131053793	131054473	131054529	NA	NA	NA	NA	NA	NA	NA	NA	NA	1	NA	NA	NA	1	NA	0.868667	NA	1	NA	NA	0.131333
Adam33	chr2	-	131054205	131054361	131053684	131053793	131054473	131054516	NA	NA	NA	NA	NA	NA	NA	NA	NA	1	NA	NA	NA	1	NA	0.896667	NA	1	NA	NA	0.103333
Adam33	chr2	-	131055950	131055979	131055755	131055827	131056189	131056379	NA	NA	NA	NA	NA	NA	NA	NA	NA	1	NA	0.816	NA	NA	NA	NA	NA	1	NA	NA	0.184
Adam33	chr2	-	131058661	131058738	131056464	131056792	131061142	131061222	NA	NA	NA	NA	NA	NA	NA	NA	NA	NA	NA	0.794	NA	NA	NA	NA	NA	1	NA	NA	0.206
Adam33	chr2	-	131058661	131058738	131056713	131056792	131061142	131061222	NA	NA	NA	NA	NA	NA	NA	1	NA	NA	NA	0.794	NA	NA	NA	NA	NA	NA	NA	NA	0.206
Adam33	chr2	-	131062528	131062575	131061142	131061222	131063414	131063569	NA	NA	NA	NA	NA	NA	NA	0	NA	0.333333	NA	0	NA	NA	NA	0	NA	NA	NA	NA	0.333333
Adam5	chr8	-	24742097	24742151	24732984	24733157	24746656	24746771	NA	NA	0.693333	NA	0.666667	NA	NA	0.935667	NA	0.564333	NA	0.803667	1	0.857333	1	0.799	NA	0.827333	NA	NA	0.435667
Adam5	chr8	-	24742097	24742151	24732984	24733157	24747481	24747568	NA	NA	NA	NA	NA	NA	NA	0.861	NA	NA	NA	NA	NA	1	NA	NA	NA	NA	NA	NA	0.139
Adam5	chr8	-	24744114	24744277	24742097	24742151	24746656	24746771	NA	NA	NA	NA	NA	NA	NA	0.0326667	NA	0.101	NA	0.228333	0	0.0433333	NA	0	NA	0	NA	NA	0.228333
Adam5	chr8	-	24746656	24746771	24742097	24742151	24747481	24747568	NA	NA	NA	1	1	NA	NA	0.935333	0.780667	0.935333	NA	1	1	0.869667	1	1	NA	0.828	NA	1	0.219333
Adam5	chr8	-	24791934	24792030	24786133	24786329	24804357	24804544	NA	1	1	1	0.919	NA	NA	0.970333	1	1	NA	1	1	0.897667	NA	1	NA	1	1	1	0.102333
Adam8	chr7	-	139986302	139986486	139985828	139985906	139986732	139986808	NA	1	1	0.666667	NA	NA	NA	NA	NA	1	NA	NA	NA	NA	NA	NA	NA	NA	NA	NA	0.333333
Adam8	chr7	-	139987818	139987967	139987178	139987737	139988213	139988434	0.880667	NA	NA	NA	NA	NA	1	NA	NA	NA	NA	NA	NA	NA	NA	NA	NA	NA	NA	NA	0.119333
Adam8	chr7	-	139987818	139987967	139987559	139987737	139988213	139988295	0.880667	NA	1	NA	1	NA	NA	NA	NA	1	NA	NA	NA	1	1	0.973	NA	1	1	NA	0.119333
Adam8	chr7	-	139988462	139988629	139988213	139988295	139988810	139988879	0.961667	1	0.952333	1	1	NA	1	1	0.906667	0.839	1	1	NA	NA	1	1	NA	NA	1	NA	0.161
Adamts10	chr17	+	33531579	33531797	33528679	33529026	33543197	33543305	NA	NA	NA	NA	NA	NA	1	NA	0.718	1	NA	NA	NA	NA	1	NA	NA	NA	NA	NA	0.282
Adamts10	chr17	+	33537778	33537943	33537335	33537424	33538263	33538410	1	NA	NA	NA	NA	NA	NA	0.715333	NA	NA	1	0.804333	NA	1	1	0.925	NA	1	NA	0.821	0.284667
Adamts10	chr17	+	33537778	33537943	33537335	33537424	33538570	33538712	NA	NA	NA	NA	NA	NA	NA	0.409333	NA	0.392333	1	NA	NA	NA	NA	0.709667	NA	0.784667	NA	NA	0.607667
Adamts10	chr17	+	33545303	33545437	33544954	33545057	33545541	33545665	0.927	0.996	0.97	0.930667	0.946333	0.868	0.974333	0.955333	0.977	0.919	0.915667	0.916333	0.882667	0.947333	0.937667	0.966667	0.968333	0.959333	0.909333	0.934	0.128
Adamts10	chr17	+	33549479	33549609	33548822	33548903	33551013	33551190	NA	NA	NA	NA	NA	NA	NA	0.776333	NA	NA	NA	NA	NA	NA	NA	0.732333	NA	0.666667	NA	NA	0.109667
Adamts12	chr15	+	11151920	11152071	11071498	11071866	11215540	11215737	1	NA	NA	NA	NA	1	0.843667	1	1	1	1	0.962667	1	0.974	NA	1	NA	1	1	1	0.156333
Adamts12	chr15	+	11217801	11217885	11215540	11215737	11237533	11237658	NA	NA	1	0.916333	1	0.71	NA	1	1	0.965667	NA	1	NA	1	NA	0.848333	NA	1	NA	NA	0.29
Adamts12	chr15	+	11241395	11241545	11237533	11237658	11255548	11255692	1	NA	0.967	0.968333	0.884667	NA	1	0.931333	1	0.954667	1	0.944333	1	0.946333	0.825333	0.971667	0.728333	0.975333	1	0.959667	0.271667
Adamts12	chr15	+	11317202	11317355	11310535	11311645	11327678	11327858	NA	NA	1	NA	NA	1	1	1	0.948	1	1	0.951333	1	NA	1	NA	0.77	1	NA	NA	0.23
Adamts12	chr15	+	11317202	11317355	11310535	11311645	11331717	11331861	NA	NA	NA	1	NA	NA	1	0.963333	1	0.954333	1	0.846667	1	0.968	NA	1	NA	0.944	NA	1	0.153333
Adamts12	chr15	+	11327678	11327858	11310535	11311645	11331717	11331861	NA	NA	NA	NA	NA	NA	NA	0.950667	1	0.914	1	0.875333	NA	NA	NA	NA	1	0.971333	NA	NA	0.124667
Adamts12	chr15	+	11327678	11327858	11317202	11317355	11331717	11331861	1	1	0.960333	1	1	0.802	1	0.875333	0.929	0.93	1	0.907333	0.873667	0.971	1	0.915333	1	0.907667	1	0.922	0.198
Adamts12	chr15	+	11327678	11327858	11317202	11317355	11336294	11336454	NA	NA	NA	NA	NA	NA	1	NA	NA	NA	0.723333	NA	NA	NA	NA	NA	NA	NA	NA	NA	0.276667
Adamts12	chr15	+	11331717	11331861	11317202	11317355	11336294	11336454	NA	NA	NA	NA	NA	NA	NA	NA	1	NA	0.803667	1	NA	NA	NA	NA	NA	NA	NA	NA	0.196333
Adamts14	chr10	-	61222783	61222897	61221857	61222006	61224272	61224405	NA	NA	1	1	NA	NA	1	1	0.882333	0.928333	1	1	1	0.950667	0.941667	1	0.983333	0.816	1	0.907667	0.184
Adamts14	chr10	-	61249603	61249760	61245925	61246116	61270856	61271257	NA	NA	NA	1	NA	NA	NA	1	1	0.869333	1	1	1	NA	1	1	0.988667	1	NA	NA	0.130667
Adamts14	chr10	-	61270856	61271257	61249603	61249760	61273155	61273242	NA	NA	1	0.829	NA	NA	1	1	0.862667	0.782333	1	1	0.953667	0.880333	1	0.957	0.928333	0.865333	NA	1	0.217667
Adamts14	chr10	-	61270856	61271257	61249603	61249760	61273155	61273438	1	0.893667	1	0.829	1	NA	NA	1	NA	NA	NA	NA	NA	NA	NA	NA	NA	NA	NA	NA	0.171
Adamts16	chr13	-	70763414	70763553	70753173	70753300	70767797	70768042	NA	NA	NA	NA	NA	NA	NA	NA	NA	0.884667	NA	1	NA	NA	NA	1	NA	NA	NA	NA	0.115333
Adamts16	chr13	-	70769978	70770278	70768599	70768723	70771982	70772155	NA	NA	NA	NA	NA	NA	NA	NA	NA	NA	NA	NA	NA	1	NA	NA	NA	NA	0.376	0.390333	0.624
Adamts16	chr13	-	70770152	70770283	70768599	70768723	70771982	70772155	NA	NA	NA	NA	NA	NA	NA	NA	0.831333	1	NA	NA	NA	NA	NA	NA	NA	0.831333	0.756	0.781667	0.244
Adamts17	chr7	+	66888300	66888470	66849706	66849872	66908592	66908676	1	NA	1	NA	0.996667	NA	1	1	0.998	1	1	0.865667	NA	NA	1	NA	NA	1	NA	NA	0.134333
Adamts17	chr7	+	67041784	67041951	67004339	67004490	67051916	67052037	NA	NA	NA	NA	NA	NA	0.820333	NA	1	NA	0.725333	NA	1	NA	NA	NA	1	NA	NA	NA	0.274667
Adamts17	chr7	+	67120810	67121015	67078241	67078377	67147560	67147738	0.965667	NA	0.988	NA	0.895667	NA	0.897667	0.867333	0.856	0.94	0.927333	0.688667	0.914333	0.763	0.905	0.939	0.895	0.965667	0.953	0.939333	0.299333
Adamts18	chr8	-	113754568	113754659	113751100	113751249	113773064	113773292	NA	NA	NA	NA	NA	NA	NA	NA	NA	NA	1	NA	1	NA	1	NA	0.821667	NA	NA	NA	0.178333
Adamts18	chr8	-	113764219	113764373	113754563	113754659	113767045	113767183	0.977	NA	0.978667	1	0.982667	NA	0.945667	0.769667	0.960333	1	0.96	NA	0.968	0.970667	0.975333	1	0.957333	0.956	0.956333	0.971667	0.230333
Adamts18	chr8	-	113767045	113767183	113754568	113754659	113773064	113773224	1	NA	1	NA	0.876	NA	1	NA	0.930667	NA	1	NA	NA	NA	1	NA	0.913333	NA	0.829	1	0.171
Adamts18	chr8	-	113767045	113767183	113754568	113754659	113773064	113773292	NA	NA	NA	NA	NA	NA	NA	NA	NA	NA	NA	NA	1	NA	NA	NA	0.913333	NA	0.829	NA	0.171
Adamts18	chr8	-	113771035	113771141	113767045	113767183	113773064	113773224	0.939333	NA	0.938	NA	0.948	NA	0.961667	0.84	0.941	0.816	0.96	1	0.973333	0.766667	0.964333	NA	0.971	1	0.975	0.976667	0.233333
Adamts18	chr8	-	113771035	113771141	113767045	113767183	113773064	113773292	0.939333	NA	0.938	0.930333	NA	NA	0.961667	0.84	NA	0.816	NA	1	NA	0.766667	NA	NA	NA	1	NA	NA	0.233333
Adamts18	chr8	-	113777675	113777962	113775255	113775449	113844854	113844878	0.969667	NA	0.939	0.849333	NA	NA	0.962667	NA	NA	0.893333	NA	1	0.942	1	0.973667	NA	0.916	NA	0.926333	0.953	0.150667
Adamts18	chr8	-	113777675	113777962	113775255	113775449	113844854	113844969	0.969667	NA	0.939	NA	0.977667	NA	0.962667	NA	0.916333	0.893333	0.937667	1	0.942	NA	0.973667	NA	0.916	1	0.926333	0.953	0.106667
Adamts18	chr8	-	113777679	113777962	113775255	113775449	113844854	113845168	0.977667	1	0.957667	0.894	0.987	NA	0.976333	0.911333	0.940667	0.928667	0.959	1	0.958333	1	0.982	NA	0.941333	1	0.947333	0.97	0.106
Adamts19	chr18	+	58985240	58985361	58954509	58954660	59007327	59007485	NA	NA	NA	NA	NA	NA	NA	0.858	0.666667	0.734333	NA	1	NA	0.811	NA	1	0.666667	1	NA	NA	0.333333
Adamts19	chr18	+	58985240	58985361	58963460	58963562	59007327	59007485	NA	NA	NA	NA	NA	NA	NA	1	NA	NA	NA	0.779	NA	NA	NA	NA	NA	1	NA	NA	0.221
Adamts3	chr5	-	89710656	89710740	89708610	89708767	89721653	89721853	0.743333	1	1	NA	1	NA	1	1	NA	NA	NA	NA	1	0.971	NA	1	NA	1	1	1	0.256667
Adamts3	chr5	-	89721653	89721853	89710656	89710740	89775284	89775441	1	1	0.886	1	1	1	0.811667	0.98	1	0.974333	1	0.983667	1	1	NA	1	NA	1	1	NA	0.188333
Adamts3	chr5	-	89881534	89881562	89861298	89861705	89882821	89883334	1	0.761667	1	0.924667	0.922	0.992	NA	0.988333	1	0.974	1	0.959667	1	0.975667	1	0.982333	0.816667	1	0.987667	0.985	0.238333
Adamts6	chr13	+	104307220	104307389	104297161	104297526	104312714	104312926	1	0.885667	1	1	1	1	1	0.978333	0.968333	1	0.958333	1	NA	1	1	NA	1	NA	0.984	1	0.114333
Adamts6	chr13	+	104314237	104314383	104313635	104313719	104347347	104347391	1	1	0.927	0.984	0.991333	0.967333	0.829333	0.927	0.917667	0.855	0.902	0.978	0.873333	0.935333	0.952333	0.963333	1	0.943333	0.816667	0.954667	0.183333
Adamts6	chr13	+	104347347	104347391	104313635	104313719	104352757	104352863	NA	NA	NA	NA	NA	NA	NA	NA	1	NA	NA	NA	1	NA	0.842	1	NA	NA	NA	NA	0.158
Adamts6	chr13	+	104413707	104413810	104399942	104400006	104426934	104427068	0.578333	NA	0.598667	0.61	0.494	0.440333	0.709333	0.600333	0.592333	0.656	0.657	0.644	0.561	0.624	0.498333	0.598	0.713	0.615	0.585	0.509333	0.272667
Adamts6	chr13	+	104413707	104413810	104399942	104400006	104444052	104444216	0.884	NA	0.969333	1	0.817333	NA	0.948667	1	0.862667	1	0.934667	0.982	0.712667	1	0.738333	0.936	0.700667	0.941	0.943667	0.918	0.299333
Adamts6	chr13	+	104426934	104427068	104399942	104400006	104444052	104444216	0.898	NA	0.954333	1	0.851667	0.966333	0.914333	1	0.830333	1	0.876	0.931333	0.861333	1	0.863667	0.926667	0.575	0.919333	0.863667	0.845667	0.425
Adamts6	chr13	+	104426934	104427068	104413707	104413810	104444052	104444216	1	NA	0.924	0.977	0.949	NA	0.947	1	0.934667	0.914333	0.869	0.860667	1	0.985333	1	0.983333	0.859333	0.908667	0.831	1	0.169
Adamts6	chr13	+	104428834	104428958	104426934	104427068	104429789	104429870	0.716333	0.874	0.781667	0.782333	0.800333	0.819	0.886667	0.843667	0.787333	0.828333	0.846667	0.684667	0.83	0.737667	0.687333	0.764	0.752667	0.804333	0.762333	0.829	0.202
Adamts6	chr13	+	104429789	104429870	104399942	104400006	104444052	104444216	0.958667	NA	0.972	NA	0.962667	0.972667	0.969	1	0.881667	1	0.948333	0.984667	NA	1	0.910667	0.967	0.884	0.972667	0.95	NA	0.118333
Adamts7	chr9	+	90186921	90187067	90186459	90186552	90188268	90188438	0.936333	NA	0.904333	0.914333	0.955	0.910333	0.973333	0.920667	0.969	0.970333	0.881333	0.919333	0.707	0.938667	0.897	0.971333	0.967333	0.941333	0.948333	0.958667	0.266333
Adamts9	chr6	-	92816469	92816643	92807014	92807185	92823346	92823514	0.910667	0.951333	0.785333	0.901333	0.947333	0.978	0.954333	0.937667	1	0.892	0.884667	0.888667	0.935667	0.942667	1	0.922	0.884333	0.937667	0.932333	0.905333	0.214667
Adamts9	chr6	-	92816469	92816643	92807014	92807185	92849291	92849468	0.886667	0.896	0.875333	0.884667	1	0.866	0.951333	0.938	0.918	0.981333	0.905	0.896	1	0.816333	0.892	0.925333	1	0.861	0.927667	0.959	0.183667
Adamts9	chr6	-	92823346	92823514	92807014	92807185	92849291	92849468	0.870667	0.88	0.916333	0.852	1	0.728667	0.934	0.932667	0.877	0.980333	0.891333	0.889333	1	0.735	0.906333	0.921	1	0.840333	0.906333	0.948667	0.271333
Adamts9	chr6	-	92823346	92823514	92816469	92816643	92849291	92849468	0.795667	0.929	0.647667	0.799	0.946667	0.662667	0.851333	0.776333	0.943667	0.871667	0.827	0.753333	0.941333	0.776333	0.886	0.802	0.818	0.813667	0.817333	0.810667	0.299
Adamts9	chr6	-	92863326	92863446	92860099	92860204	92869934	92870099	0.924667	1	1	0.946333	0.927667	0.903667	0.957667	0.968333	0.954333	0.936	0.951667	0.898	1	0.934333	1	0.968333	0.965667	0.963333	0.961	0.968667	0.102
Adamts9	chr6	-	92863326	92863446	92860099	92860204	92872287	92872452	0.972	0.973333	1	0.962667	0.976667	0.803667	0.943333	1	0.943	0.961	0.986	0.963667	1	0.961667	1	0.966	1	0.988	0.98	0.986	0.196333
Adamts9	chr6	-	92869934	92870099	92860099	92860204	92872287	92872452	0.968	0.954	1	0.945333	0.974333	0.847667	0.943667	1	0.867	0.957	0.981333	0.958667	1	0.944333	1	0.942667	NA	0.978	0.974	0.981	0.152333
Adamts9	chr6	-	92869934	92870099	92863326	92863446	92872287	92872452	0.971	1	0.830667	1	0.948667	0.949	0.988667	0.991667	0.927333	1	0.989667	0.992	1	0.987333	0.797667	1	1	1	0.981333	0.967667	0.202333
Adamts9	chr6	-	92909905	92909989	92909688	92909804	92912622	92912912	0.948	0.929	0.986	0.946	0.939667	0.840667	0.949	0.897	0.98	0.919	0.954333	0.899667	1	0.899	1	0.912667	1	0.922333	0.952	0.976667	0.159333
Adamtsl1	chr4	+	86243716	86243767	86232552	86232691	86247970	86248175	NA	NA	NA	NA	1	NA	0.663	0.727667	0.838667	0.745667	0.58	0.631667	0.664333	0.674333	0.573333	0.753333	0.525	0.721	0.790667	1	0.475
Adamtsl1	chr4	+	86243716	86243767	86232552	86232691	86249762	86249910	NA	NA	NA	NA	1	NA	1	0.75	0.754	NA	NA	0.805	0.603333	0.599333	1	0.651667	0.944333	0.822333	NA	NA	0.400667
Adamtsl1	chr4	+	86247970	86248175	86232552	86232691	86249762	86249910	1	NA	NA	NA	1	NA	1	0.764	0.884667	0.921	0.666667	0.844	0.772	0.699	1	0.759333	0.967	0.910333	0.666667	1	0.333333
Adamtsl1	chr4	+	86247970	86248175	86243716	86243767	86249762	86249910	NA	NA	1	0.666667	1	NA	1	1	1	0.844	0.666667	1	1	0.933	0.914	0.958	0.977667	1	NA	1	0.333333
Adamtsl1	chr4	+	86356334	86356462	86342029	86343155	86374851	86374980	NA	NA	1	NA	NA	NA	1	0.875	0.777	0.953	1	1	0.896	0.919667	0.962333	0.923	0.924333	0.974333	1	1	0.223
Adamtsl2	chr2	+	27093532	27093890	27089583	27089759	27095402	27095772	NA	NA	NA	0.918667	NA	0.656333	NA	0.59	1	0.736	NA	0.789333	0.836333	0.696333	NA	0.700667	0.786333	0.681667	1	1	0.41
Adamtsl2	chr2	+	27101606	27101733	27098605	27098703	27102768	27102982	NA	NA	NA	NA	NA	1	NA	1	NA	1	NA	0.952	0.809	0.960667	NA	1	1	0.832667	1	1	0.191
Adamtsl3	chr7	+	82465563	82465690	82450038	82450275	82493336	82493411	NA	NA	NA	NA	NA	NA	NA	1	NA	0.888333	NA	NA	NA	NA	NA	1	NA	NA	NA	NA	0.111667
Adamtsl3	chr7	+	82514974	82515086	82499597	82499755	82520717	82520856	NA	NA	NA	NA	1	NA	NA	NA	1	1	0.666667	1	NA	1	NA	0.958667	NA	NA	NA	NA	0.333333
Adamtsl3	chr7	+	82540305	82540595	82530552	82530637	82547873	82548003	NA	NA	NA	NA	NA	NA	NA	1	NA	1	NA	NA	1	0.848667	NA	0.952	NA	1	NA	1	0.151333
Adamtsl4	chr3	-	95681259	95681432	95681023	95681135	95681651	95681856	NA	NA	NA	NA	NA	NA	1	0.765333	NA	NA	NA	NA	1	1	NA	NA	NA	NA	NA	0.875667	0.234667
Adamtsl5	chr10	-	80342306	80343020	80342058	80342222	80344832	80344941	NA	NA	NA	NA	NA	NA	NA	NA	NA	NA	NA	NA	0.809	NA	1	NA	NA	NA	NA	NA	0.191
Adamtsl5	chr10	-	80345321	80345413	80345042	80345103	80345512	80345703	1	NA	0.914	NA	0.959333	NA	0.98	NA	1	NA	1	NA	1	1	0.977667	1	1	NA	0.877667	0.967333	0.122333
Adamtsl5	chr10	-	80347281	80347337	80345512	80345703	80347556	80347855	NA	NA	NA	NA	NA	NA	NA	NA	NA	NA	NA	NA	0	0.0263333	NA	NA	NA	0	0	0.132	0.132
Adap1	chr5	-	139293135	139293218	139280704	139280817	139302303	139302395	1	0.896	NA	1	1	NA	1	1	1	NA	0.866667	1	NA	NA	NA	NA	1	NA	0.984333	1	0.133333
Adap2	chr11	+	80174087	80174150	80170677	80170761	80176055	80176133	NA	NA	NA	NA	NA	NA	NA	0.666667	NA	NA	NA	1	NA	0.857	NA	1	NA	NA	NA	1	0.333333
Adar	chr3	+	89734841	89736273	89715021	89715150	89737989	89738173	1	0.896333	0.950667	0.935	0.965667	0.891333	0.884667	0.901	0.877333	1	0.964667	0.879667	0.932667	1	0.977333	0.893	0.923667	0.942333	0.985	0.966667	0.122667
Adarb1	chr10	-	77325618	77325691	77321648	77322583	77325865	77325940	0.0663333	0.0466667	0.0936667	0.149333	0.129667	0.318667	0.163333	0.0543333	0.125333	0.185333	0.111667	0.292	0.0856667	0.155333	0.143	0.041	0.136667	0.203	0.298333	0.08	0.277667
Adarb1	chr10	-	77359566	77359735	77325865	77325940	77418094	77418211	1	NA	0.979	1	1	1	NA	1	1	1	1	0.966333	NA	1	1	0.876667	NA	1	NA	NA	0.123333
Adarb2	chr13	+	8701579	8701731	8697619	8697788	8713599	8713768	NA	NA	NA	1	NA	NA	NA	NA	NA	0.897667	NA	NA	NA	NA	NA	NA	NA	NA	1	0.881333	0.118667
Adarb2	chr13	+	8713599	8713768	8697619	8697788	8731789	8731971	NA	NA	NA	NA	NA	NA	NA	NA	NA	NA	NA	NA	NA	NA	NA	NA	NA	NA	0.82	1	0.18
Adarb2	chr13	+	8713599	8713768	8701579	8701731	8731789	8731971	NA	NA	NA	1	NA	NA	NA	NA	NA	0.853667	NA	NA	NA	NA	NA	NA	NA	NA	NA	NA	0.146333
Adat1	chr8	-	111978038	111978138	111970864	111972191	111982161	111982765	NA	0.957333	0.931333	0.963667	NA	0.961333	0.924333	0.917333	NA	0.959333	0.862333	0.946667	0.977667	0.945333	0.973667	0.881667	0.966333	0.843667	0.979	0.985	0.141333
Adat1	chr8	-	111979298	111979444	111972104	111972191	111982161	111982765	0.976333	0.964667	0.94	0.978333	0.958	0.970333	0.939	0.952667	0.989	0.979333	0.939	0.969667	0.983	0.956667	0.984	0.922667	0.976333	0.854667	0.986667	0.990333	0.135667
Adat1	chr8	-	111979298	111979444	111972104	111972191	111987121	111987252	0.86	NA	0.826667	0.794667	1	0.479	0.663	0.504667	0.845333	0.899333	0.695333	0.743	0.772	0.772	NA	1	1	0.739	0.805	0.839333	0.521
Adat1	chr8	-	111979298	111979444	111972104	111972191	111989850	111989919	NA	NA	NA	NA	NA	NA	1	NA	NA	NA	NA	NA	0.772	NA	NA	NA	1	NA	NA	1	0.228
Adck1	chr12	+	88431020	88431179	88371694	88371778	88446640	88446757	NA	NA	NA	NA	NA	NA	NA	1	NA	1	1	0.822667	NA	NA	NA	NA	NA	1	NA	NA	0.177333
Adck2	chr6	+	39586840	39586894	39580995	39581091	39587368	39587752	NA	NA	0.898	1	NA	NA	NA	NA	NA	NA	NA	NA	NA	NA	NA	NA	NA	NA	NA	NA	0.102
Adcy2	chr13	-	68642456	68642603	68630909	68631024	68651867	68652026	NA	NA	NA	NA	NA	NA	0.882667	NA	NA	NA	NA	NA	NA	1	NA	NA	NA	NA	1	0.992667	0.117333
Adcy5	chr16	+	35290026	35290191	35289504	35289621	35291501	35291677	1	0.758667	NA	1	NA	NA	1	0.987333	1	0.985	1	0.980333	1	0.996667	NA	0.992	NA	1	0.917	1	0.241333
Adcy7	chr8	+	88323631	88323807	88322934	88323033	88324433	88324599	0.974333	NA	1	NA	1	NA	1	0.891667	1	1	0.992333	1	1	1	1	0.977333	0.984	1	1	NA	0.108333
Adcy8	chr15	-	64716029	64716188	64704657	64704804	64725452	64725531	NA	NA	NA	NA	NA	NA	1	NA	0.908333	NA	1	NA	0.994667	1	1	NA	0.974	1	NA	0.768667	0.231333
Adcy8	chr15	-	64744840	64744930	64737389	64737562	64746896	64747098	NA	NA	NA	NA	NA	NA	0.666667	NA	0.516333	NA	0.768333	0.757333	0.698333	NA	0.818	0.768667	0.811333	0.887	NA	0.666667	0.370667
Adcy8	chr15	-	64767806	64768004	64754783	64754884	64783723	64783994	NA	NA	NA	NA	NA	NA	0.860667	1	0.776333	NA	0.775333	1	0.908	0.899667	0.887667	0.948	0.880333	0.726667	NA	0.905333	0.273333
Adcy9	chr16	-	4323766	4323957	4312684	4312789	4417852	4419587	0.692667	NA	NA	NA	NA	1	0.56	0.840667	0.814	0.927	NA	0.733667	0.725667	0.692	NA	0.707667	0.666667	0.642	0.702333	1	0.44
Adcyap1r1	chr6	+	55478678	55478776	55478081	55478191	55479164	55479297	1	NA	NA	1	NA	0.976	NA	1	NA	0.910333	NA	1	NA	0.861333	NA	0.962333	NA	1	0.978667	0.977667	0.138667
Adcyap1r1	chr6	+	55479954	55480108	55479164	55479297	55480423	55480484	NA	NA	NA	NA	NA	NA	NA	NA	NA	NA	NA	1	NA	1	NA	1	NA	0.824333	NA	NA	0.175667
Adcyap1r1	chr6	+	55487658	55487742	55484941	55485033	55491226	55491310	0.168	NA	NA	NA	NA	0.0766667	NA	0	NA	0.33	NA	NA	NA	0.333333	NA	0	NA	NA	0.589	0.0766667	0.589
Adcyap1r1	chr6	+	55487658	55487742	55484941	55485033	55494076	55494206	0.333333	0	NA	0.333333	NA	0.214	NA	0.0856667	NA	0.184667	NA	NA	NA	NA	NA	0	NA	0.333333	0.164667	NA	0.333333
Adcyap1r1	chr6	+	55491226	55491310	55484941	55485033	55494076	55494206	0.700333	0.109667	NA	0.388667	NA	0.487	NA	0.408	NA	0.432333	NA	NA	NA	1	NA	0.626333	NA	0.458	0.446333	0.818667	0.890333
Adcyap1r1	chr6	+	55491226	55491310	55487658	55487742	55494076	55494206	0.916333	NA	NA	NA	NA	NA	NA	0.740667	NA	1	NA	NA	NA	1	NA	1	NA	NA	0.916333	1	0.259333
Adcyap1r1	chr6	+	55491229	55491310	55484941	55485033	55494076	55494206	0.642	0.099	NA	0.551333	NA	0.149	NA	0.247	NA	0.376333	NA	NA	NA	1	NA	0.499667	NA	0.548333	0.409667	0.792333	0.901
Adcyap1r1	chr6	+	55494076	55494206	55487658	55487742	55495573	55495615	NA	1	NA	0.877333	NA	NA	NA	NA	NA	1	NA	NA	NA	NA	NA	NA	NA	NA	NA	NA	0.122667
Add1	chr5	+	34629135	34629172	34628414	34628513	34630234	34630284	0.961667	1	0.969667	1	0.956	NA	0.975	0.965	0.967667	0.975	0.984333	0.939333	1	1	1	0.877667	1	1	0.963333	0.986667	0.122333
Add1	chr5	+	34629135	34629172	34628414	34628513	34630469	34632308	0.0936667	0.0773333	0.0556667	0.0466667	0.0466667	0.051	0.0566667	0.0373333	0.0526667	0.038	0.0563333	0.0386667	0.0303333	0.0186667	0.027	0.016	0.0326667	0.021	0.130667	0.142333	0.126333
Add3	chr19	+	53244309	53244405	53242503	53242627	53244997	53247399	0.914667	0.633333	0.829333	0.699	0.838333	0.722667	0.506	0.448667	0.565333	0.471667	0.607667	0.558333	0.362	0.159667	0.366667	0.183667	0.352333	0.191	0.888667	0.691	0.755
Adgb	chr10	-	10391683	10391777	10390814	10390949	10394555	10394693	1	NA	NA	NA	NA	NA	NA	NA	NA	NA	NA	NA	NA	NA	NA	NA	NA	NA	0.333333	NA	0.666667
Adgra2	chr8	+	27110434	27110598	27109940	27110012	27111051	27111265	1	0.995	1	1	NA	1	NA	0.997333	0.878	0.993667	NA	0.992	1	0.993667	1	0.997667	1	0.994333	1	1	0.122
Adgra2	chr8	+	27111051	27111265	27109940	27110012	27115236	27115461	NA	NA	NA	NA	NA	NA	NA	0.666667	NA	1	NA	0.841667	NA	1	NA	NA	NA	NA	NA	NA	0.333333
Adgra2	chr8	+	27113285	27113484	27111051	27111265	27115236	27115461	NA	NA	NA	NA	NA	NA	NA	1	NA	0.878333	NA	0.766667	NA	0.830333	NA	1	NA	1	NA	NA	0.233333
Adgra2	chr8	+	27113285	27113484	27112342	27112507	27114079	27114229	1	0.992333	1	0.994667	1	0.984333	0.666667	0.987667	0.948	0.992	1	0.992667	1	0.993667	1	0.990667	1	0.994	1	1	0.333333
Adgra2	chr8	+	27114079	27114229	27111051	27111265	27115236	27115461	NA	NA	NA	1	NA	NA	NA	1	NA	0.771	NA	0.553667	NA	NA	NA	1	NA	1	NA	NA	0.446333
Adgra2	chr8	+	27120446	27120536	27119823	27119851	27120765	27120899	1	0.991	0.789333	0.958667	1	0.957333	1	NA	0.893667	0.955333	NA	0.945667	1	NA	NA	NA	0.914667	0.943333	0.941	0.958	0.210667
Adgra2	chr8	+	27120765	27120899	27119823	27119851	27121001	27121623	NA	NA	NA	NA	NA	1	NA	1	NA	1	NA	0.992	NA	1	NA	NA	NA	1	1	0.830333	0.169667
Adgra3	chr5	-	50058133	50058343	50050868	50050960	50058551	50058645	0.821667	NA	NA	0.636667	0.517333	NA	0.716	0.636667	0.611333	0.242333	0.682667	0.675333	0.934667	1	0.732333	0.641	0.556333	0.595333	0.611	0.923667	0.757667
Adgrb1	chr15	+	74571412	74571515	74569868	74569972	74580564	74580736	0.986333	NA	NA	NA	1	NA	1	1	NA	NA	NA	0.841	NA	1	NA	1	NA	0.975667	0.890667	0.969333	0.159
Adgrb1	chr15	+	74572074	74572225	74571412	74571515	74572806	74572876	1	NA	1	NA	1	NA	1	1	0.92	NA	0.928	1	0.728333	0.836333	1	0.858667	1	0.92	0.902	0.860667	0.271667
Adgrb1	chr15	+	74577394	74577493	74575838	74575924	74580564	74580736	0.692667	NA	NA	1	NA	NA	NA	NA	NA	0.616	0.538333	0.683	0.786	0.370333	NA	NA	NA	0.544	0.694	0.482	0.629667
Adgrb1	chr15	+	74580564	74580736	74569868	74569972	74582891	74582987	1	NA	NA	NA	NA	NA	0.819	NA	NA	NA	NA	NA	NA	NA	NA	NA	NA	NA	1	NA	0.181
Adgrb2	chr4	+	130005024	130005108	129992053	129992879	130007561	130007726	0.892333	NA	NA	0.761333	1	NA	0.916333	0.884	0.947667	0.922667	0.909333	0.945	0.935667	0.915667	1	0.826667	0.973	0.866333	0.946667	0.851	0.238667
Adgrb2	chr4	+	130005389	130005554	129992053	129992879	130007561	130007726	NA	NA	NA	0.728	NA	NA	NA	0.717	0.854667	0.852333	0.767	0.876	0.854667	0.745667	1	0.663333	0.925	0.735333	NA	0.726333	0.336667
Adgrb2	chr4	+	130005389	130005554	130005024	130005108	130006751	130006916	0.882333	NA	1	0.854667	0.886667	NA	0.972667	0.884	0.905333	0.951667	0.898	0.949	1	0.893	1	0.954333	0.870667	0.93	0.938333	0.948333	0.145333
Adgrb2	chr4	+	130005389	130005554	130005024	130005108	130007561	130007726	0.822333	NA	1	1	1	NA	0.890667	0.954	1	0.936333	0.918333	0.951333	0.779667	0.918333	0.928667	0.959	0.925	0.940667	0.835	0.929333	0.220333
Adgrb2	chr4	+	130006751	130006916	130005024	130005108	130007561	130007726	0.506667	NA	NA	1	1	NA	0.684	0.879333	1	0.764667	0.798667	0.858667	0.506333	0.737667	NA	0.852	0.821	0.819667	0.607	0.754	0.493667
Adgrb2	chr4	+	130006751	130006916	130005389	130005554	130007561	130007726	0.222	NA	0.456667	0.332667	0.194	NA	0.627333	0.377333	0.548667	0.28	0.412	0.331333	0.171333	0.299333	0.443667	0.349667	0.314333	0.321333	0.455	0.316333	0.456
Adgrb2	chr4	+	130013492	130013643	130011824	130011951	130013821	130013891	0.884667	NA	NA	NA	NA	NA	1	NA	NA	NA	NA	NA	NA	NA	NA	NA	NA	NA	NA	NA	0.115333
Adgrb2	chr4	+	130014934	130015033	130014550	130014636	130017061	130017233	0.116667	NA	0.209	0.175	0.123667	NA	0.231	0.129	0.300333	0.119667	0.181667	0.165667	0.105667	0.103333	0.125	0.129667	0.171333	0.113	0.183667	0.161	0.197
Adgrb2	chr4	+	130014934	130015033	130014550	130014636	130017528	130017624	NA	NA	NA	NA	NA	NA	NA	NA	NA	NA	NA	0.8	0.772333	0.786667	0.772333	0.658333	1	0.836	NA	NA	0.341667
Adgrb3	chr1	-	25098875	25098915	25093764	25094408	25101432	25101528	0.898	NA	NA	NA	NA	NA	NA	NA	NA	NA	NA	NA	NA	NA	NA	NA	NA	NA	1	NA	0.102
Adgrb3	chr1	-	25112176	25112275	25111691	25111863	25117288	25117374	NA	NA	NA	NA	NA	NA	NA	0.953333	NA	1	NA	0.868	NA	0.973667	NA	1	NA	1	NA	0.962333	0.132
Adgre1	chr17	+	57401904	57402051	57361671	57361734	57406833	57406980	NA	NA	NA	0.872333	NA	1	NA	NA	NA	NA	NA	0.783667	NA	NA	NA	NA	NA	NA	NA	NA	0.216333
Adgre1	chr17	+	57402741	57402861	57402500	57402656	57406833	57406980	NA	NA	NA	NA	NA	NA	1	1	0.890333	1	1	NA	1	0.983667	NA	1	NA	1	NA	1	0.109667
Adgre1	chr17	+	57441254	57441371	57420346	57420524	57443897	57444082	NA	NA	NA	NA	NA	NA	0.891333	1	NA	1	NA	NA	0.907	1	NA	0.946	NA	1	0.941	NA	0.108667
Adgre1	chr17	+	57447829	57448024	57445008	57445179	57449865	57450101	NA	NA	NA	1	NA	1	NA	1	1	0.919333	NA	1	1	1	NA	1	NA	0.972	1	0.87	0.13
Adgre5	chr8	-	83730110	83730257	83729381	83729525	83733413	83733566	0.444333	0.626	1	0.495	NA	0.590333	1	0.644333	0.156667	0.582333	0.670667	0.705333	0.652667	0.583	0.477	0.649667	0.86	0.626667	0.692667	0.718	0.843333
Adgre5	chr8	-	83731902	83732037	83729381	83729525	83733413	83733566	NA	0.260667	NA	0.399333	NA	0.375333	NA	0.359	0.211333	0.335333	0.333333	0.496667	NA	0.324	NA	0.463	0.666667	0.501	0.271667	NA	0.455333
Adgre5	chr8	-	83731902	83732037	83730110	83730257	83733413	83733566	0.427667	0.279667	NA	0.642	NA	0.660333	NA	0.463	NA	0.529333	NA	0.555333	0.441667	0.41	0.333333	0.481333	0.271667	0.572	0.512333	0.202333	0.458
Adgre5	chr8	-	83733413	83733566	83729381	83729525	83741106	83741169	NA	0.986667	NA	1	NA	NA	NA	0.966	1	0.981	NA	0.903667	NA	0.963333	NA	0.942333	NA	0.893	1	NA	0.107
Adgre5	chr8	-	83734008	83734125	83729381	83729525	83741106	83741169	NA	NA	NA	NA	NA	NA	NA	0.766667	NA	0.666667	NA	0.169333	NA	0.733333	NA	NA	NA	0.182	NA	NA	0.597333
Adgre5	chr8	-	83734008	83734125	83730110	83730257	83741106	83741169	NA	NA	NA	NA	NA	NA	NA	1	NA	NA	NA	0.333333	NA	1	NA	NA	NA	0.671667	NA	NA	0.666667
Adgre5	chr8	-	83734295	83734410	83734008	83734125	83741106	83741183	NA	0.982667	NA	1	NA	1	NA	0.902333	NA	0.957	NA	0.976333	1	0.875333	NA	0.897333	NA	0.965667	1	0.907667	0.124667
Adgre5	chr8	-	83734301	83734352	83734008	83734125	83741106	83741326	NA	NA	NA	1	NA	NA	NA	0.816667	NA	0.902333	NA	0.978	NA	0.798333	NA	0.842333	NA	0.960667	NA	NA	0.201667
Adgrf4	chr17	-	42669628	42669898	42666503	42667886	42672495	42672647	NA	NA	NA	NA	NA	NA	NA	NA	NA	NA	NA	NA	1	NA	0.896333	NA	1	NA	0.829	1	0.171
Adgrg1	chr8	+	94997300	94997416	94994477	94994999	95002438	95002509	0.0873333	NA	0.182667	NA	0.146	NA	0.018	NA	0.394667	NA	0.0313333	NA	0.0383333	NA	NA	NA	0.517667	NA	0.113	0.394667	0.499667
Adgrg2	chrX	+	160430349	160430394	160390727	160390749	160438194	160438313	NA	NA	NA	NA	NA	NA	NA	NA	NA	NA	0.666667	NA	NA	1	NA	NA	NA	NA	NA	1	0.333333
Adgrg2	chrX	+	160434772	160434902	160430349	160430394	160438194	160438313	0.109667	NA	0.220667	NA	0.333333	NA	0.333333	NA	NA	0	NA	NA	NA	0.111333	NA	0.399	NA	NA	0.0336667	0.0326667	0.399
Adgrg2	chrX	+	160456004	160456037	160438194	160438313	160458834	160458873	NA	NA	NA	NA	NA	NA	0.666667	1	NA	NA	1	NA	NA	NA	NA	NA	NA	NA	1	NA	0.333333
Adgrg2	chrX	+	160456004	160456037	160438194	160438313	160461342	160461381	0.147333	NA	NA	NA	NA	NA	0.201667	0.362	NA	0.480667	NA	NA	NA	0.469	NA	0.537667	NA	NA	0.214667	0.332	0.390333
Adgrg2	chrX	+	160458834	160458873	160456004	160456037	160461342	160461381	NA	NA	NA	NA	NA	NA	NA	NA	NA	NA	NA	NA	NA	0.676333	NA	NA	NA	NA	0.565333	NA	0.111
Adgrg2	chrX	+	160458834	160458882	160438194	160438313	160461342	160461381	0	NA	NA	NA	NA	NA	0.117	0.197	NA	NA	NA	NA	NA	NA	NA	NA	NA	NA	0	NA	0.197
Adgrg2	chrX	+	160463327	160463369	160461342	160461381	160465577	160465631	0.254667	NA	NA	NA	0.476	NA	0.344333	0.0666667	NA	NA	NA	0.333333	NA	0.547333	NA	0.714333	NA	0.333333	0.213333	0.368333	0.647667
Adgrg2	chrX	+	160468891	160468947	160465577	160465631	160469767	160469823	1	NA	0.666667	NA	1	NA	NA	NA	1	NA	NA	NA	NA	NA	NA	NA	NA	NA	NA	NA	0.333333
Adgrg2	chrX	+	160492599	160492752	160491397	160491499	160496304	160498070	0.858	NA	1	NA	1	NA	1	1	0.824333	1	0.934	1	1	0.836	1	0.939333	1	0.897333	1	1	0.175667
Adgrg3	chr8	+	95034949	95035096	95033357	95033493	95035809	95035864	NA	0.821667	NA	0.899	NA	NA	0.771667	0.885333	NA	0.893667	0.826333	0.851667	0.811333	0.768333	NA	0.885333	1	0.814667	1	1	0.231667
Adgrg3	chr8	+	95036206	95036328	95035809	95035944	95036440	95036480	NA	0	NA	0.128	NA	0.059	NA	0.09	NA	0.109333	0.144	0.101	0.445333	0.0923333	0.190333	0.159333	0.223667	0.0576667	0	NA	0.445333
Adgrg6	chr10	-	14407865	14407911	14402582	14405438	14409672	14409825	0.140667	NA	0.198	NA	0	0.333333	0.218667	0.121	0.117	0.0876667	0.0893333	0	0.429667	0.231667	0.189667	0.210667	0.198667	0.158333	0.0356667	0.103667	0.429667
Adgrg6	chr10	-	14456137	14456221	14450578	14450664	14458079	14458148	0.335333	NA	0.515	NA	NA	NA	0.901667	NA	0.916333	0	0.848333	0	1	0	0.971667	0.035	0.866333	0.00766667	0.479333	0.569	1
Adgrl1	chr8	+	83924205	83924355	83922998	83923108	83926261	83926276	0.633	0.543	NA	0.558	NA	0.729	0.551333	0.636	0.551	0.642	0.585667	0.601333	0.817333	0.698	NA	0.727333	0.849	0.855333	0.494667	0.671333	0.360667
Adgrl1	chr8	+	83924205	83924355	83922998	83923108	83929463	83930052	0.166	0.224333	NA	0.105	NA	0.121333	0.127667	0.124667	0.114333	0.105667	0.123333	0.132	0.139333	0.140333	NA	0.122333	0.189667	0.164667	0.120333	0.122333	0.119333
Adgrl1	chr8	+	83924205	83924355	83923091	83923108	83926261	83926276	0.633	0.543	0.733333	0.558	0.552	0.729	NA	0.636	0.551	NA	0.585667	NA	0.817333	0.698	0.861667	0.727333	0.849	NA	0.494667	0.671333	0.367
Adgrl1	chr8	+	83924205	83924355	83923091	83923108	83929463	83930052	0.166	0.224333	0.219333	0.105	0.141	0.121333	NA	0.124667	0.114333	NA	0.123333	NA	0.139333	0.140333	0.156333	0.122333	0.189667	NA	0.120333	0.122333	0.119333
Adgrl1	chr8	+	83926261	83926276	83922998	83923108	83929463	83930264	0.0826667	0.167	0.0816667	0.047	0.091	0.0406667	0.0843333	0.0576667	0.0816667	0.0543333	0.0633333	0.0756667	0.015	0.0486667	0.0223333	0.0306667	0.0236667	0.023	0.112333	0.0486667	0.152
Adgrl1	chr8	+	83926261	83926276	83924205	83924355	83929463	83930264	0.577667	NA	NA	0.319	NA	NA	0.209667	0.27	0.557	0.518	0.314	0.54	0.516	0.199667	0.69	0.221333	0.174667	0.287	0.59	0.425333	0.515333
Adgrl1	chr8	+	83937915	83937933	83937648	83937777	83938349	83940011	0.944	0.960667	0.918	0.933	0.900667	0.966	0.893	0.896	0.879667	0.907333	0.902667	0.891333	0.906667	0.878	0.873333	0.878667	0.897667	0.864667	0.918333	0.903	0.101333
Adgrl2	chr3	-	148820972	148821025	148815855	148817928	148822954	148823051	0.133	0.116	0.161667	0.171333	0.157333	0.15	0.16	0.175	0.155333	0.139667	0.166333	0.150667	0.228333	0.209	0.185333	0.218	0.182	0.237667	0.117	0.170667	0.121667
Adgrl2	chr3	-	148820972	148821054	148817721	148817928	148822954	148823051	0.126667	0.138333	0.16	0.149667	0.138667	0.154667	0.135	0.161	0.138	0.135333	0.137	0.137667	0.198333	0.194	0.173333	0.211333	0.164	0.219333	0.112333	0.17	0.107
Adgrl2	chr3	-	148821279	148821408	148817092	148817928	148822987	148823051	0.501667	0.316333	0.344	0.266	0.448333	NA	0.351333	0.225	0.426667	0.175667	0.389	0.345333	0.275333	0.239333	0.485	0.204333	0.493667	0.257333	0.687667	0.715	0.539333
Adgrl2	chr3	-	148821279	148821408	148818647	148818686	148822954	148823051	NA	NA	NA	NA	NA	NA	0.948	NA	NA	NA	NA	NA	0.802667	0.938667	NA	NA	NA	NA	1	1	0.197333
Adgrl2	chr3	-	148823695	148823824	148816092	148817928	148890411	148890625	NA	NA	NA	NA	NA	NA	1	NA	NA	NA	NA	NA	0.882333	NA	NA	NA	NA	NA	NA	NA	0.117667
Adgrl2	chr3	-	148827211	148827238	148826364	148826533	148827540	148827585	0.478667	NA	0.418667	NA	0.380333	0.150333	0.284333	0.444667	0.231	0	0.150333	0.228333	0.097	NA	0.150333	0	0	NA	0	0.0716667	0.478667
Adgrl2	chr3	-	148827540	148827585	148827211	148827238	148828476	148828568	NA	NA	NA	NA	1	NA	NA	NA	1	NA	0.865	1	NA	NA	NA	NA	NA	NA	NA	NA	0.135
Adgrl2	chr3	-	148858732	148859533	148816092	148817928	148890411	148890625	NA	NA	NA	NA	NA	NA	1	NA	NA	NA	NA	NA	0.729333	NA	NA	NA	NA	NA	NA	NA	0.270667
Adgrl2	chr3	-	148858732	148859533	148816939	148817928	148890411	148890625	NA	NA	NA	NA	NA	NA	NA	NA	NA	NA	NA	NA	0.729333	1	0.737667	NA	1	NA	NA	1	0.270667
Adgrl2	chr3	-	148858732	148859533	148846848	148847032	148890411	148890625	NA	NA	NA	NA	NA	NA	NA	1	NA	NA	NA	NA	NA	NA	NA	NA	NA	NA	0.815667	NA	0.184333
Adgrl3	chr5	+	81067690	81067721	81020570	81021345	81197565	81197631	0.419	0.637333	0.440667	0.790667	0.768	NA	0.667	0.586333	0.635667	0.585333	0.683	0.671333	0.518667	0.604667	0.62	0.550667	0.655333	0.560333	0.700333	0.568333	0.371667
Adgrl3	chr5	+	81329756	81329960	81309936	81310079	81387774	81387988	0.689667	0.864	0.854333	0.693	0.711333	0.517	0.625333	0.664333	0.695	0.634667	0.575667	0.557333	0.578	0.540667	0.62	0.608333	0.617667	0.673333	0.568667	0.594	0.347
Adgrl3	chr5	+	81329756	81329960	81309936	81310079	81465194	81465304	0.950333	1	NA	1	NA	0.986	0.951	0.958	1	0.977	1	0.899333	1	0.993333	0.98	0.978333	1	0.984667	1	1	0.100667
Adgrl3	chr5	+	81465194	81465304	81309870	81310079	81560862	81560943	NA	NA	NA	NA	NA	NA	NA	NA	NA	NA	NA	0.871667	NA	NA	NA	NA	NA	1	NA	NA	0.128333
Adgrl3	chr5	+	81509723	81509738	81387774	81387988	81511983	81512784	NA	NA	NA	NA	NA	NA	NA	NA	NA	NA	NA	NA	NA	0.427333	NA	NA	NA	NA	0.593667	1	0.572667
Adgrl3	chr5	+	81509723	81509738	81465194	81465304	81511983	81512784	0.16	NA	0.176333	0.0443333	0.0676667	0.007	0.0763333	0.058	0.0373333	0.0643333	0.047	0.0816667	0.0453333	0.115	0.0973333	0.141	0.09	0.1	0.202667	0.303667	0.296667
Adgrl3	chr5	+	81511979	81512784	81465194	81465304	81560862	81560943	NA	NA	NA	NA	NA	NA	NA	0.945667	0.950667	1	NA	0.949333	NA	NA	NA	0.849	NA	NA	NA	NA	0.151
Adgrl3	chr5	+	81511983	81512784	81465194	81465304	81560862	81560943	0.957667	0.938	1	1	0.973	0.952667	0.925333	0.967667	0.969667	1	0.914	0.968	0.932667	0.978	0.927	0.893667	0.969	0.924333	0.967	0.962667	0.106333
Adgrl3	chr5	+	81663385	81663424	81660261	81660447	81688508	81688692	0.278333	NA	0.108	0.137333	0.198667	0.110333	0.197333	0.309	0.227333	0.33	0.166	0.197	0.159	0.244667	0.127667	0.243	0.115667	0.252667	0.416667	0.402333	0.308667
Adgrl3	chr5	+	81774392	81774431	81771583	81771680	81787435	81787564	NA	NA	NA	NA	NA	NA	NA	NA	NA	NA	NA	NA	NA	0.666667	NA	NA	NA	NA	0.201333	0.0596667	0.607
Adgrl3	chr5	+	81774392	81774431	81771583	81771680	81792360	81792978	0	NA	NA	NA	NA	NA	NA	NA	NA	NA	NA	NA	NA	NA	NA	NA	NA	NA	0.116	0.00933333	0.116
Adgrl3	chr5	+	81787435	81787564	81771583	81771680	81792360	81792412	0.474	NA	NA	NA	NA	NA	NA	NA	NA	NA	NA	NA	NA	0.333333	NA	NA	NA	NA	0.295333	0.242	0.232
Adgrl3	chr5	+	81787435	81787564	81774392	81774431	81792360	81792412	NA	NA	NA	NA	NA	NA	NA	NA	NA	NA	NA	NA	NA	NA	NA	NA	NA	NA	0.865333	1	0.134667
Adgrl3	chr5	+	81787435	81787564	81774392	81774431	81794263	81795347	NA	NA	NA	NA	NA	NA	NA	NA	NA	0.0823333	NA	0.443333	NA	NA	NA	0	NA	0.333333	0.333333	0.443333	0.443333
Adgrl3	chr5	+	81792360	81792412	81771583	81771680	81794263	81795347	0.0563333	0	0	0	0	0	0.00366667	0.0166667	0	0.003	0.00733333	0.00166667	0	0.005	0	0	0.00466667	0	0.0966667	0.129333	0.129333
Adgrl3	chr5	+	81792360	81792412	81787435	81787564	81794263	81795347	0.804667	NA	NA	NA	NA	NA	NA	NA	NA	NA	NA	NA	NA	NA	NA	NA	NA	NA	0.954667	0.893	0.15
Adgrl4	chr3	+	151492276	151492426	151439097	151439387	151497826	151497976	NA	NA	NA	1	NA	0.957333	NA	0.915333	NA	0.967	NA	0.981667	NA	0.720667	NA	0.979667	NA	0.839667	NA	NA	0.279333
Adgrv1	chr13	-	81283355	81283472	81270743	81270922	81374181	81374282	1	NA	NA	NA	1	NA	1	NA	NA	NA	NA	NA	1	NA	NA	NA	NA	NA	0.972	0.835	0.165
Adgrv1	chr13	-	81422128	81422264	81418995	81420098	81424222	81424397	0.973333	NA	NA	NA	1	NA	0.901667	NA	1	NA	NA	0.829667	1	1	NA	NA	NA	0.863333	0.789	0.901667	0.211
Adgrv1	chr13	-	81422128	81422264	81418995	81420098	81427602	81427746	0.923333	NA	NA	NA	NA	NA	0.863333	NA	NA	NA	NA	1	NA	NA	NA	NA	NA	0.885667	0.815	0.956667	0.185
Adgrv1	chr13	-	81424222	81424397	81418995	81420098	81427602	81427746	0.915	NA	NA	NA	0.698	NA	NA	NA	NA	NA	NA	1	NA	NA	NA	NA	NA	NA	0.858	0.923	0.302
Adgrv1	chr13	-	81424222	81424397	81422128	81422264	81427602	81427746	1	NA	NA	NA	NA	NA	1	NA	NA	NA	NA	0.724	NA	NA	NA	NA	NA	NA	0.962667	1	0.276
Adgrv1	chr13	-	81488906	81489171	81487851	81487974	81492456	81492564	0.886	NA	1	NA	1	NA	NA	NA	NA	NA	NA	NA	NA	NA	NA	NA	NA	NA	1	NA	0.114
Adhfe1	chr1	+	9551716	9551757	9549906	9549944	9552922	9552976	NA	NA	NA	NA	NA	NA	NA	NA	0.733667	0.666667	NA	0.81	NA	NA	NA	NA	NA	NA	0	0.103667	0.81
Adhfe1	chr1	+	9563508	9563587	9560108	9560207	9563796	9563893	NA	NA	NA	NA	NA	NA	NA	1	NA	1	NA	0.666667	NA	NA	NA	NA	NA	NA	NA	NA	0.333333
Adk	chr14	+	21240462	21240571	21169799	21169878	21369070	21369106	NA	NA	NA	NA	NA	NA	NA	NA	0.676333	0.782667	NA	NA	NA	NA	NA	NA	NA	NA	0.893667	NA	0.217333
Adk	chr14	+	21381502	21381617	21318012	21318183	21447813	21448568	NA	NA	NA	NA	NA	NA	NA	NA	1	0.780667	NA	0.813	NA	NA	NA	NA	1	NA	NA	NA	0.219333
Adm	chr7	+	110628256	110628376	110627660	110627821	110628524	110628674	NA	NA	NA	NA	NA	NA	NA	1	NA	NA	NA	NA	1	0.880333	NA	1	NA	1	NA	1	0.119667
Adnp	chr2	-	168204599	168204774	168180985	168185172	168206573	168206922	NA	NA	NA	NA	NA	1	0.877667	0.947	NA	0.803333	0.875667	0.842667	0.717333	0.719667	0.748667	0.597333	0.898667	0.682667	0.929333	0.792333	0.402667
Adnp	chr2	-	168204599	168204774	168187566	168187659	168206573	168206922	0.317	0.297667	0.382667	0.383333	0.371333	0.157333	NA	0.394667	0.506667	0.335333	0.464333	0.382	0.377	0.274333	0.341	0.176667	NA	0.185667	0.455667	0.302333	0.349333
Adnp	chr2	-	168204599	168204774	168189281	168189394	168206573	168206922	0.446667	0.626667	0.432333	0.456333	0.411	0.529667	0.352667	0.323	0.306	0.298	0.339333	0.255	0.354333	0.329	0.306333	0.259667	0.417	0.306	0.335	0.285333	0.371667
Adora1	chr1	-	134234014	134234412	134199224	134203590	134235227	134235431	NA	NA	NA	NA	NA	NA	0.852667	0.394333	0.700333	0.644	0.398667	NA	0.727667	0.482333	0.649667	0.666667	0.543667	0.818333	1	0.704	0.605667
Adora1	chr1	-	134234014	134234446	134203396	134203590	134235227	134235364	NA	NA	NA	NA	NA	NA	0.854333	0.375667	0.690333	0.642	0.368333	NA	0.720667	0.476333	0.640333	NA	0.424	0.77	NA	0.594333	0.486
Adora2a	chr10	+	75325784	75326351	75316942	75317147	75333026	75334788	NA	1	NA	NA	NA	NA	NA	0.963333	NA	1	NA	1	NA	0.891667	NA	1	NA	1	1	1	0.108333
Adprm	chr11	-	67042918	67043036	67041695	67042107	67052534	67052585	0.0683333	0.00633333	0.0226667	0.041	0.181667	0	0.015	0.0263333	0	0.055	0	0.0136667	0.018	0.0273333	0	0	0.02	0	0.0243333	0.017	0.181667
Adprm	chr11	-	67051680	67051778	67041392	67042107	67052534	67052594	0.898333	0.790667	0.861333	0.787667	0.943	0.874333	0.826667	0.831667	0.801667	0.834333	0.807333	0.788333	0.815	0.783667	0.828667	0.853	0.855	0.779333	0.849	0.753333	0.189667
Adprm	chr11	-	67051680	67051914	67041881	67042107	67052534	67052589	0.776333	0.601333	0.727333	0.605	0.859	0.759	0.634	0.641667	0.599	0.663333	0.616333	0.587	0.610667	0.589667	0.649667	0.690333	0.673333	0.566333	0.675667	0.542667	0.316333
Adrbk2	chr5	-	112969167	112969269	112960543	112961648	112973506	112973580	1	NA	NA	NA	1	0.944	NA	1	1	NA	0.886	1	NA	NA	NA	NA	1	NA	0.948667	0.854	0.146
Adrbk2	chr5	-	112969167	112969269	112961586	112961648	112973506	112973580	NA	NA	NA	NA	NA	NA	1	1	NA	NA	0.886	NA	1	0.976667	NA	1	NA	1	0.948667	0.854	0.146
Adrbk2	chr5	-	112969167	112969308	112961586	112961648	112973506	112973580	NA	NA	NA	NA	NA	NA	1	1	1	NA	0.804333	1	NA	0.953	NA	1	NA	1	0.861667	0.657667	0.342333
Adrbk2	chr5	-	112973506	112973580	112960543	112961648	112985764	112985841	0.905	NA	NA	NA	NA	NA	0.852333	0.913	NA	NA	1	0.919333	1	0.961	NA	0.862	NA	1	1	1	0.147667
Adrbk2	chr5	-	112973506	112973580	112969167	112969269	112985764	112985841	1	NA	NA	NA	1	NA	0.958	1	1	NA	0.944667	1	1	0.986	1	1	0.895667	0.966	0.933	1	0.104333
Adrbk2	chr5	-	112973506	112973580	112969167	112969308	112985764	112985841	1	NA	1	1	0.971333	NA	1	0.966	1	0.870333	1	1	0.884333	1	1	1	0.852333	1	1	1	0.147667
Adrm1	chr2	+	180172855	180172972	180171658	180171688	180173909	180174946	NA	NA	1	NA	0.836	1	NA	NA	NA	NA	1	NA	NA	NA	NA	NA	NA	NA	NA	NA	0.164
Adrm1	chr2	+	180173909	180174033	180172855	180172972	180174308	180174395	1	0.750333	0.971	0.905	1	NA	1	0.971	1	1	1	0.86	NA	1	1	0.811667	NA	1	1	NA	0.249667
Adrm1	chr2	+	180174308	180174395	180172855	180174033	180174864	180174946	1	0.847	1	1	NA	1	1	1	0.951667	1	1	NA	NA	NA	1	NA	NA	NA	0.975	1	0.153
Adrm1	chr2	+	180175242	180175392	180174864	180174946	180175853	180175956	NA	NA	NA	NA	NA	NA	0.728333	1	1	NA	1	NA	NA	NA	NA	NA	NA	NA	NA	NA	0.271667
Adrm1	chr2	+	180175242	180175392	180174864	180174946	180176073	180176286	NA	NA	NA	NA	NA	NA	NA	NA	NA	NA	NA	1	NA	NA	NA	1	NA	0.728333	NA	NA	0.271667
Adsl	chr15	+	80962695	80962786	80960394	80960566	80967588	80967765	NA	NA	NA	NA	NA	NA	NA	NA	NA	NA	NA	NA	1	1	NA	NA	NA	NA	1	0.845333	0.154667
Adtrp	chr13	-	41828142	41828385	41816137	41816272	41847490	41847684	NA	NA	NA	NA	NA	NA	NA	NA	NA	NA	NA	NA	0.888333	NA	0.833333	NA	1	NA	NA	NA	0.166667
Aebp1	chr11	+	5866432	5866510	5865384	5865453	5866919	5867000	0.838	1	0.918333	0.973	1	0.923333	1	0.965667	1	0.978	NA	1	1	0.979667	1	0.946667	1	0.976667	0.794667	0.972333	0.205333
Aebp2	chr6	+	140650755	140650782	140647971	140648085	140677390	140678472	0.902	0.832667	0.950333	0.868	0.925	0.938333	0.954667	0.845333	0.962667	0.902333	0.924667	0.881667	NA	0.91	0.927	0.925667	0.978667	0.928667	0.929333	0.954333	0.146
Aen	chr7	+	78902229	78902830	78895926	78896014	78905842	78906043	0.385667	0.302	0.405667	0.308667	0.484667	0.226667	0.387	0.324667	0.442667	0.388333	0.433333	0.35	0.363	0.271333	0.330667	0.239	0.344667	0.238333	0.387	0.368333	0.258
Aen	chr7	+	78902229	78902830	78896008	78896201	78905842	78906043	0.970667	1	0.967333	0.956	0.923333	0.993	0.977	0.973667	0.925667	0.991667	0.959333	0.988667	0.884	0.948333	0.902667	0.96	0.875	1	0.985	0.964333	0.125
Aen	chr7	+	78902343	78902830	78895933	78896014	78905842	78906043	0.403	0.317667	0.437667	0.340333	0.506667	0.254667	0.415	0.348333	0.455333	0.423333	0.450333	0.382667	0.382	0.284	0.346333	0.247667	0.360333	0.240333	0.411667	0.377333	0.266333
AF529169	chr9	-	89596009	89596075	89591100	89591300	89596435	89596690	NA	NA	NA	0.333333	NA	NA	NA	0.525	NA	0.0823333	NA	NA	NA	0.178	NA	NA	NA	0.522333	0.457333	0.396667	0.442667
Afap1	chr5	+	35945187	35945296	35936037	35936132	35948034	35948246	0.910667	0.943333	0.846	0.69	0.969667	0.749667	0.945333	0.879	0.936667	0.895333	0.867333	0.82	0.883667	0.807333	1	0.837667	0.926667	0.725	0.904333	0.926	0.31
Afap1	chr5	+	35987054	35987321	35984187	35984306	35989553	35989668	0.23	NA	0.0213333	0.0146667	0.039	0.0496667	0.019	0.021	0.0256667	0.0253333	0.0273333	0.0226667	0.0246667	0.0173333	0.0103333	0.00433333	0.0133333	0.014	0.368667	0.288333	0.364333
Afap1l2	chr19	-	56928248	56928428	56925066	56925156	56937234	56937325	NA	NA	NA	NA	NA	0.897667	NA	NA	NA	NA	NA	1	NA	NA	NA	NA	NA	NA	NA	NA	0.102333
Aff1	chr5	+	103715349	103715405	103692373	103692603	103783123	103783244	NA	NA	NA	NA	NA	NA	1	NA	0.891333	1	1	NA	0.836333	1	1	NA	1	NA	NA	1	0.163667
Aff1	chr5	+	103816212	103816249	103814981	103815068	103818934	103818986	0.993667	1	1	1	1	0.827	0.987333	0.984667	1	1	1	0.981	1	1	NA	NA	NA	1	0.985667	1	0.173
Aff2	chrX	+	69523435	69523556	69360504	69360838	69544408	69544623	NA	1	NA	0.989333	NA	0.882667	NA	0.967	NA	0.992	NA	1	NA	1	NA	0.965333	NA	0.980667	1	NA	0.117333
Aff2	chrX	+	69523435	69523568	69360293	69360838	69544408	69545269	NA	1	NA	0.983	NA	0.792333	NA	0.963	1	0.979333	NA	1	NA	1	NA	0.954333	NA	0.977	1	NA	0.207667
Aff3	chr1	-	38341720	38341801	38329871	38329908	38406495	38406543	0.884	0.902333	0.862333	0.941	0.921	0.811333	0.924667	0.873	0.824333	0.836667	0.881667	0.863667	0.902667	0.869	0.792667	0.863	0.833	0.853667	0.893333	0.879333	0.148333
Afg3l1	chr8	+	123481070	123481145	123477902	123478047	123485888	123486038	0.795	NA	NA	1	1	NA	0.822	0.87	1	NA	0.884	1	0.864333	NA	0.919333	1	1	NA	NA	NA	0.205
Afg3l1	chr8	+	123498587	123498698	123493827	123493935	123501232	123501433	1	NA	0.913	1	1	NA	0.916667	0.982333	0.953	0.938	0.97	0.953667	0.797667	0.979667	0.862667	0.950333	0.920333	0.948	0.935667	NA	0.202333
Afmid	chr11	+	117828078	117828169	117825923	117826006	117832344	117832449	NA	NA	NA	0.555667	NA	NA	NA	0.522667	0.491667	0.498333	NA	0.479	NA	0.596667	0.710333	0.600667	0.639333	0.66	NA	NA	0.231333
Afmid	chr11	+	117828078	117828169	117825923	117826006	117832527	117832576	NA	NA	NA	0.741333	NA	NA	NA	NA	NA	1	NA	NA	NA	NA	NA	NA	NA	NA	NA	NA	0.258667
Afmid	chr11	+	117828078	117828169	117825923	117826006	117834766	117834852	NA	NA	NA	0.899333	NA	NA	NA	1	1	0.878333	NA	1	NA	0.845333	NA	1	0.7	1	NA	NA	0.3
Afmid	chr11	+	117828078	117828169	117825923	117826006	117838492	117839908	NA	NA	NA	0.925333	NA	NA	NA	NA	NA	0.789	NA	NA	NA	NA	NA	NA	NA	NA	NA	NA	0.136333
Afmid	chr11	+	117828078	117828169	117825973	117826006	117832344	117832449	0.725333	NA	0.672	NA	0.354333	0.619667	0.648	NA	NA	NA	NA	NA	0.540333	0.596667	0.710333	0.600667	0.639333	NA	0.463	NA	0.371
Afmid	chr11	+	117828078	117828169	117825973	117826006	117834945	117835018	NA	NA	NA	NA	NA	NA	0.878333	NA	NA	NA	NA	NA	1	NA	NA	NA	NA	NA	NA	NA	0.121667
Afmid	chr11	+	117828078	117828169	117825980	117826006	117832344	117832449	0.725333	NA	0.672	0.555667	0.354333	0.619667	0.648	0.522667	0.491667	NA	0.589667	0.479	0.540333	0.596667	0.710333	0.600667	0.639333	NA	0.463	0.622667	0.371
Afmid	chr11	+	117828078	117828169	117825980	117826006	117832527	117832576	NA	NA	1	0.741333	NA	1	NA	NA	NA	NA	NA	NA	NA	NA	NA	NA	NA	NA	NA	NA	0.258667
Afmid	chr11	+	117828078	117828169	117825980	117826006	117834766	117834852	NA	NA	NA	NA	NA	NA	NA	NA	NA	NA	NA	NA	NA	NA	1	NA	0.7	NA	NA	NA	0.3
Afmid	chr11	+	117828078	117828169	117825980	117826006	117834945	117835018	NA	NA	NA	NA	NA	NA	NA	0.845333	NA	NA	NA	NA	NA	1	NA	NA	NA	NA	NA	NA	0.154667
Afmid	chr11	+	117832344	117832449	117828078	117828169	117834766	117834852	NA	NA	NA	1	NA	NA	NA	1	1	0.883667	NA	1	NA	NA	NA	1	NA	NA	NA	NA	0.116333
Afmid	chr11	+	117832527	117832576	117828078	117828169	117834766	117834852	NA	NA	NA	1	NA	NA	NA	NA	NA	0.836	NA	NA	NA	NA	NA	NA	NA	NA	NA	NA	0.164
Afmid	chr11	+	117834766	117834852	117828078	117828169	117834945	117835018	NA	NA	NA	NA	NA	NA	NA	NA	NA	NA	NA	NA	0.97	0.891667	1	NA	NA	1	NA	NA	0.108333
Afmid	chr11	+	117834766	117834852	117832527	117832576	117834945	117835018	0.900667	NA	0.868	0.861333	0.871667	0.953333	0.909333	0.776	0.828	0.890667	0.795333	0.870667	0.928333	0.73	0.901	0.848	0.964667	0.895667	0.871	0.886667	0.234667
Afmid	chr11	+	117834945	117835018	117832527	117832576	117836407	117836512	NA	NA	NA	NA	NA	NA	NA	0.701	NA	0.666667	NA	NA	NA	NA	NA	1	NA	NA	NA	NA	0.333333
Afmid	chr11	+	117835502	117835581	117835144	117835242	117836407	117836512	NA	1	NA	NA	1	0.868333	1	NA	1	NA	0.970667	1	NA	NA	NA	NA	1	NA	NA	NA	0.131667
Afmid	chr11	+	117835502	117835581	117835144	117835242	117836407	117837234	NA	NA	NA	1	NA	0.868333	NA	NA	NA	NA	NA	NA	NA	NA	NA	NA	NA	NA	NA	NA	0.131667
Afmid	chr11	+	117835665	117835807	117835144	117835242	117836407	117836512	NA	NA	NA	NA	NA	0.828	NA	NA	1	NA	0.979667	1	NA	NA	NA	NA	1	NA	NA	NA	0.172
Aftph	chr11	-	20696750	20696831	20692464	20692588	20698312	20698373	0.058	0.120333	0.025	0.0176667	0.054	0.052	0.041	0.038	0.0623333	0.067	0.0346667	0.0286667	0.0716667	0.056	0.066	0.025	0.0706667	0.0143333	0.119667	0.2	0.185667
Aftph	chr11	-	20696750	20698373	20692464	20692588	20703710	20703833	0.848333	0.883333	0.562667	0.366667	0.831	0.637	0.804	0.497667	0.932	0.536667	0.738	0.405333	0.699333	0.606667	0.797333	0.518333	0.838	0.535667	0.797667	0.758333	0.565333
Aftph	chr11	-	20696750	20698373	20692464	20692588	20725684	20727142	NA	NA	NA	NA	NA	NA	NA	NA	NA	NA	NA	NA	NA	NA	1	NA	0.529	NA	NA	NA	0.471
Aftph	chr11	-	20703710	20703833	20685715	20686198	20725684	20726172	1	NA	0.834	1	1	NA	NA	NA	NA	1	0.778333	NA	0.778333	NA	NA	NA	NA	0.519333	NA	0.944667	0.480667
Aftph	chr11	-	20703710	20703833	20692464	20692588	20725684	20726172	NA	NA	NA	NA	NA	NA	NA	NA	NA	NA	1	NA	1	NA	1	NA	0.634667	1	NA	NA	0.365333
Agap1	chr1	+	89766305	89766464	89743727	89743896	89789162	89789324	0.764667	0.685667	0.805667	0.742	0.784333	0.792	0.808333	0.780333	0.762667	0.722667	0.779667	0.731667	0.709667	0.714	0.748333	0.654	0.744667	0.679333	0.734	0.731333	0.154333
Agap1	chr1	+	89823856	89823934	89789162	89789324	89834433	89834588	0.168	0.256333	0.103	0.126667	0.120667	0.166333	0.0763333	0.144667	0.103	0.133333	0.101667	0.150333	0.0783333	0.133333	0.042	0.0933333	0.0743333	0.0826667	0.171667	0.193333	0.214333
Agap3	chr5	+	24476632	24476720	24452333	24452534	24477738	24477873	0.0546667	NA	NA	NA	NA	NA	NA	NA	NA	NA	NA	NA	NA	NA	NA	0.139	NA	NA	0.333333	NA	0.278667
Agap3	chr5	+	24476903	24476989	24452176	24452534	24477738	24477873	0	NA	NA	NA	NA	NA	NA	NA	NA	NA	NA	NA	NA	NA	NA	NA	NA	NA	0.333333	0.666667	0.666667
Agap3	chr5	+	24496732	24496903	24487788	24487893	24499657	24499812	0.297667	NA	0.905667	0.458333	0.486	NA	0.366333	NA	0.745	1	0.561333	NA	NA	0.74	0.478	0.397333	0.625	0.427333	NA	NA	0.702333
Agap3	chr5	+	24498069	24498207	24492957	24493126	24500122	24500345	0.552333	NA	0.730333	NA	0.937	0.498	NA	NA	NA	NA	0.417	NA	NA	NA	NA	NA	NA	NA	NA	NA	0.52
Agap3	chr5	+	24499657	24499812	24487788	24487893	24500122	24500345	NA	NA	NA	NA	NA	NA	NA	NA	0.769667	NA	1	NA	NA	NA	NA	NA	NA	NA	NA	NA	0.230333
Agbl2	chr2	+	90783575	90783673	90782743	90782760	90784061	90784125	1	NA	NA	NA	NA	NA	1	NA	NA	1	1	NA	1	0.843	0.939333	0.843	0.819	1	0.666667	1	0.333333
Agbl2	chr2	+	90783575	90783673	90782743	90782760	90791459	90791612	NA	NA	NA	NA	NA	NA	NA	NA	NA	NA	NA	NA	NA	1	NA	NA	NA	0.526667	NA	NA	0.473333
Agbl2	chr2	+	90783579	90783673	90782727	90782760	90784061	90784125	1	NA	NA	NA	NA	NA	1	NA	NA	1	1	NA	1	0.740667	0.94	0.844333	0.820333	1	0.666667	1	0.333333
Agbl2	chr2	+	90783985	90784125	90783560	90783673	90788932	90789067	NA	NA	NA	NA	NA	NA	NA	NA	NA	NA	NA	NA	NA	1	NA	1	1	0.847	NA	NA	0.153
Agbl2	chr2	+	90783985	90784125	90783560	90783673	90791459	90791645	NA	NA	NA	NA	NA	NA	1	0.730333	NA	NA	NA	NA	0.884667	1	1	1	1	0.862	0.740333	NA	0.269667
Agbl2	chr2	+	90784061	90784125	90783579	90783673	90788932	90789067	NA	NA	NA	NA	NA	NA	NA	NA	NA	NA	NA	NA	NA	1	NA	1	1	0.899333	NA	NA	0.100667
Agbl2	chr2	+	90784061	90784125	90783579	90783673	90791459	90791645	0.908667	NA	NA	NA	1	NA	1	NA	NA	1	NA	1	0.947	1	1	1	NA	0.888333	0.666667	0.888333	0.333333
Agbl2	chr2	+	90788932	90789067	90783572	90783673	90791459	90791645	NA	NA	NA	NA	NA	NA	NA	NA	NA	NA	NA	NA	NA	NA	NA	NA	1	0.666667	NA	NA	0.333333
Agbl2	chr2	+	90788932	90789067	90783985	90784125	90791459	90791645	NA	NA	NA	NA	NA	NA	NA	NA	NA	NA	NA	NA	NA	NA	NA	0.497667	1	0.541	NA	NA	0.502333
Agbl2	chr2	+	90788932	90789067	90783985	90784125	90793872	90793980	NA	NA	NA	NA	NA	NA	NA	NA	NA	NA	NA	NA	NA	NA	NA	0.775	NA	1	NA	NA	0.225
Agbl2	chr2	+	90788932	90789067	90784059	90784125	90791459	90791645	NA	NA	NA	NA	NA	NA	NA	NA	NA	NA	NA	NA	NA	0.828667	NA	NA	NA	0.541	NA	NA	0.287667
Agbl2	chr2	+	90788932	90789067	90784061	90784125	90791459	90791645	0.731333	NA	NA	NA	1	NA	0.684	0.83	0.894667	1	0.959333	NA	0.910667	0.828667	0.942667	0.497667	1	NA	0.886	0.902	0.502333
Agbl2	chr2	+	90788932	90789067	90784061	90784125	90793872	90793980	NA	NA	NA	NA	NA	NA	0.957	0.775	1	NA	NA	NA	NA	NA	NA	NA	NA	NA	NA	NA	0.225
Agbl2	chr2	+	90789778	90789832	90783985	90784125	90791459	90791612	NA	NA	NA	NA	NA	NA	NA	NA	0.837333	NA	NA	NA	0.855333	NA	0.861	0.590333	1	0.518667	NA	NA	0.481333
Agbl2	chr2	+	90789778	90789832	90783985	90784125	90791459	90791645	NA	NA	NA	NA	NA	NA	NA	NA	NA	NA	NA	NA	NA	0.559	NA	0.590333	1	0.518667	NA	NA	0.481333
Agbl2	chr2	+	90789778	90789832	90788932	90789067	90791459	90791612	1	NA	0.846	NA	1	NA	0.801667	0.773	0.958333	1	0.782	NA	0.847667	NA	0.720333	1	0.580667	0.903333	1	0.673667	0.419333
Agbl2	chr2	+	90789778	90789832	90788932	90789067	90791459	90791645	NA	NA	0.846	NA	1	NA	NA	NA	NA	NA	NA	NA	NA	NA	NA	1	0.580667	0.903333	NA	NA	0.419333
Agbl2	chr2	+	90791459	90791645	90783985	90784125	90793872	90793980	0.854333	NA	NA	NA	1	NA	0.961333	0.833667	1	NA	1	1	1	1	1	0.955	NA	NA	0.952667	1	0.166333
Agbl2	chr2	+	90811256	90811364	90810640	90810763	90813274	90813352	0.355667	0.153667	0.429333	0.765	0.523667	0.116333	0.339	0.385	0.667667	0.507667	0.444667	0.581667	0.475667	0.637333	0.51	0.381333	0.327667	0.361333	0.484667	0.504667	0.648667
Agbl2	chr2	+	90811256	90811364	90810640	90810763	90815339	90816231	NA	NA	1	NA	0.692333	NA	NA	NA	NA	NA	NA	NA	NA	NA	NA	NA	NA	NA	NA	NA	0.307667
Agbl2	chr2	+	90811256	90811364	90810640	90810763	90815339	90817244	0.666667	NA	1	NA	0.692333	NA	NA	NA	0.723333	NA	0.872333	NA	0.694	0.93	0.867667	NA	0.797667	0.622333	0.782	0.684667	0.377667
Agbl2	chr2	+	90813274	90813352	90810640	90810763	90815339	90817244	0.889667	0.946667	1	1	0.885667	1	0.909333	0.953333	0.777333	1	0.961667	0.918333	0.919667	0.975	0.955667	0.935333	0.945667	0.871	0.878667	0.863667	0.222667
Agbl3	chr6	+	34783569	34783593	34782099	34782218	34785190	34785683	1	NA	0.956667	NA	0.951333	NA	0.935667	0.923333	0.961	0.788	0.875667	0.876333	0.964333	0.882333	0.875333	0.827333	0.892333	0.790333	0.915333	0.975333	0.212
Agbl3	chr6	+	34793881	34793989	34785190	34785376	34798193	34798332	NA	NA	1	NA	1	NA	1	0.94	0.779333	0.894	0.925667	0.687333	1	1	0.839333	0.708667	1	0.967	1	0.839333	0.312667
Agbl5	chr5	+	30905017	30905155	30904702	30904815	30905630	30905761	0.527667	0.443333	0.533667	0.622	0.438667	0.662333	0.491333	0.567	0.543333	0.461	0.540333	0.607	0.645	0.659667	0.573333	0.668333	0.573667	0.639333	0.478333	0.655	0.229667
Agbl5	chr5	+	30905017	30905155	30904702	30904815	30906115	30906666	0.559667	0.72	0.631333	0.885	0.582	NA	0.706667	0.691667	0.665333	0.539333	0.853	0.824333	1	0.855667	0.84	0.805333	0.805333	0.726667	0.501333	0.738667	0.498667
Agbl5	chr5	+	30905108	30905155	30904702	30904815	30905630	30905761	0.762667	0.737	0.761333	0.810667	0.700667	0.825	0.743	0.819333	0.796	0.758667	0.795	0.835667	0.823333	0.847667	0.799	0.85	0.776333	0.833	0.782667	0.850667	0.15
Agbl5	chr5	+	30905108	30905155	30904702	30904815	30906115	30906667	0.914	0.923333	0.805333	0.981333	0.883	0.843333	0.940667	0.964667	0.967	0.962	0.976333	0.977	1	0.973333	0.968333	0.981333	0.963667	0.920333	0.941333	NA	0.194667
Ager	chr17	+	34600350	34600377	34599995	34600137	34600494	34600621	0.736	1	0.817667	0.838	0.79	NA	0.846	0.779333	0.844333	0.742667	0.678333	NA	0.862333	0.895	0.852333	0.864	0.939333	0.894667	0.898667	0.832333	0.321667
Ager	chr17	+	34600350	34600377	34600123	34600137	34600494	34600621	NA	1	NA	0.838	0.79	0.844333	NA	0.779333	NA	0.742667	0.678333	0.786	NA	NA	NA	NA	NA	0.894667	NA	NA	0.321667
Agfg1	chr1	+	82886374	82886467	82886110	82886187	82893423	82893582	0.857	0.883	0.885333	0.887333	0.875667	0.899667	0.874333	0.846667	0.885667	0.847	0.897667	0.846333	0.828667	0.802	0.864667	0.801333	0.871667	0.783667	0.880667	0.872	0.116
Agfg2	chr5	-	137660161	137660194	137655607	137655728	137661363	137661492	0.202333	0.228667	0.134667	0.178	0.116333	0.192333	0.145667	0.124	0.121	0.130333	0.130667	0.114	0.154333	0.103333	0.147	0.07	0.118667	0.100333	0.254667	0.213667	0.184667
Agk	chr6	+	40347411	40347451	40329492	40329599	40352352	40352432	0.954	0.966667	0.939	0.954667	0.883667	0.944333	0.927667	0.897	0.952667	0.969333	0.921333	0.922667	0.968	0.878	0.886	0.884	0.961	0.830667	0.965	0.913333	0.138667
Agk	chr6	+	40352352	40352432	40329492	40329599	40357044	40357120	NA	1	1	0.917667	NA	NA	1	NA	0.943333	1	1	NA	NA	1	NA	NA	NA	NA	1	0.882333	0.117667
Agk	chr6	+	40352352	40352432	40329492	40329599	40364274	40364367	NA	NA	NA	NA	NA	NA	1	0.849667	NA	NA	NA	NA	NA	NA	NA	NA	NA	NA	NA	NA	0.150333
Agk	chr6	+	40355013	40355093	40352352	40354807	40357044	40357535	NA	NA	NA	NA	NA	NA	0.710667	NA	NA	NA	NA	NA	NA	NA	NA	NA	NA	NA	NA	1	0.289333
Ago1	chr4	-	126461684	126461805	126460000	126460135	126468396	126468583	NA	NA	NA	NA	NA	NA	NA	NA	1	NA	0.811	NA	NA	NA	0.666667	NA	NA	NA	NA	NA	0.333333
Ago3	chr4	-	126403164	126403301	126376906	126377041	126404204	126404335	0.898	1	0.932333	0.902	0.785333	0.966	1	0.982667	0.983333	0.975	1	0.961333	0.944667	0.985	0.928333	0.950333	0.968333	0.981667	0.964667	1	0.214667
Ago3	chr4	-	126403164	126403301	126376906	126377041	126407741	126407862	0.971	0.959	0.928667	NA	0.769	NA	0.967	NA	NA	NA	NA	NA	NA	NA	NA	NA	NA	NA	0.956667	NA	0.202
Ago3	chr4	-	126404204	126404413	126376906	126377041	126407741	126407862	0.969	0.957	0.920333	0.941333	0.773	1	0.972667	0.86	0.932333	0.840333	1	0.884667	0.912333	0.794	0.912333	0.818333	0.949667	0.818333	0.957	0.812	0.227
Ago4	chr4	-	126497210	126497312	126489540	126493331	126506743	126506878	NA	NA	NA	NA	NA	NA	NA	1	NA	NA	NA	NA	0.945	0.667	NA	1	NA	0.935	1	0.882667	0.333
Ago4	chr4	-	126511399	126511533	126509950	126510135	126511725	126511854	0.888333	0.611	0.878333	0.902333	0.903333	1	0.901	0.748333	0.871333	0.795	0.832333	0.906667	0.903	0.919667	0.938333	0.914333	0.897333	0.832333	0.891333	0.915667	0.389
Ago4	chr4	-	126511399	126511533	126509950	126510135	126511998	126512118	NA	NA	0.863667	NA	NA	NA	1	0.861667	0.947	0.689667	0.914333	1	NA	1	1	NA	NA	NA	0.861667	NA	0.310333
Ago4	chr4	-	126511725	126511854	126509950	126510135	126511998	126512118	0.951667	1	0.932333	1	1	NA	1	0.933667	0.967	0.803333	0.971333	1	NA	1	1	0.975	1	1	0.939667	1	0.196667
Ago4	chr4	-	126516836	126516971	126512519	126512667	126517375	126517557	NA	NA	NA	NA	NA	NA	NA	NA	NA	NA	NA	NA	NA	0.902	NA	NA	NA	0.731333	NA	NA	0.170667
Ago4	chr4	-	126517069	126517206	126512519	126512667	126517375	126517557	NA	NA	1	0.842333	NA	NA	NA	NA	NA	NA	0.982667	NA	1	NA	1	NA	0.946667	0.942333	NA	NA	0.157667
Agpat1	chr17	+	34610959	34611005	34610444	34610644	34611604	34611700	0.531333	NA	NA	NA	NA	NA	NA	NA	NA	NA	NA	NA	NA	0.915	0.333333	NA	0.531333	NA	NA	NA	0.581667
Agpat3	chr10	-	78351626	78351711	78287846	78288073	78352212	78352489	0.702	NA	1	NA	0.927	NA	0.916333	0.901333	1	NA	0.880333	NA	NA	1	NA	NA	1	NA	0.935333	0.971667	0.298
Agpat3	chr10	-	78351626	78351711	78329275	78329336	78352212	78352489	0.536	0.616333	0.612333	0.565667	0.540333	0.836	0.531	0.427333	0.463333	0.371	0.495333	0.348333	0.49	0.471	0.583333	0.442667	0.550333	0.469	0.497	0.514333	0.487667
Agps	chr2	+	75902917	75902979	75894108	75894157	75909600	75909700	NA	NA	NA	0.467	NA	NA	NA	NA	NA	NA	NA	1	NA	1	NA	NA	NA	NA	NA	NA	0.533
Agrn	chr4	-	156168545	156168569	156167776	156167809	156168732	156168820	0.152	NA	NA	NA	NA	NA	NA	NA	NA	NA	0.666667	NA	NA	NA	NA	NA	NA	NA	0.222667	0.275667	0.514667
Agrn	chr4	-	156169545	156169557	156168732	156168820	156169769	156169881	NA	NA	0.630333	NA	NA	NA	0.910667	NA	NA	NA	0.478667	NA	0.610667	0.882	0.771	NA	0.333333	NA	1	0.882	0.666667
Agrn	chr4	-	156169545	156169557	156169219	156169336	156169769	156169881	0.092	0.143333	0.056	0.091	0.0606667	0.0553333	0.0443333	0.0693333	0.0523333	0.062	0.059	0.0613333	0.0363333	0.0503333	0.0393333	0.0423333	0.0353333	0.0366667	0.125333	0.0996667	0.108
Agrp	chr8	-	105584335	105584377	105567605	105567726	105637279	105637393	NA	NA	NA	0.142667	NA	NA	0.142667	0.0666667	NA	0.424	0.111	NA	NA	0.219333	NA	NA	0.476	NA	NA	0.444333	0.409333
Agtpbp1	chr13	-	59460468	59460629	59449537	59450314	59461996	59462173	0.923667	0.896	0.909667	0.901333	0.838333	0.880333	0.928333	0.921667	0.815	0.912667	0.819	0.93	0.944333	0.891333	0.957333	0.895	0.957333	0.878333	0.905667	0.887	0.142333
Agtpbp1	chr13	-	59482516	59482604	59476993	59477138	59495332	59495481	0.810667	0.787	0.775	0.823333	0.88	0.672667	0.718667	0.846333	0.712667	0.841333	0.806667	0.840333	0.736667	0.806667	0.705333	0.793667	0.853667	0.776667	0.890333	0.808333	0.217667
Agtpbp1	chr13	-	59517652	59517690	59514086	59514295	59525145	59525239	0.672667	0.772	0.755667	0.833	0.518	0.650667	0.785	0.816	0.637333	0.794333	0.788667	0.829333	0.583333	0.664	0.590667	0.671333	0.690667	0.732333	0.804667	0.706667	0.315
Agtpbp1	chr13	-	59528386	59528518	59514086	59514295	59532012	59532076	NA	NA	NA	NA	NA	NA	NA	1	NA	NA	NA	NA	NA	NA	NA	0.732	NA	1	1	1	0.268
Agtpbp1	chr13	-	59531056	59531203	59528386	59528518	59532012	59532076	0.972333	0.955333	0.942	0.942667	0.889	0.989333	0.935	0.938	0.851	0.943333	0.875333	0.946667	0.914	0.99	0.971333	0.964667	0.879333	0.976333	0.930333	0.938	0.139
Agtpbp1	chr13	-	59555679	59555810	59544386	59544451	59557222	59557347	0	NA	0.0216667	0.076	0.164667	0	0.0466667	0.013	0.082	0.018	NA	0.02	NA	0.0323333	0	0.0193333	0	0.0203333	0.042	0.0143333	0.164667
Ahcy	chr2	-	155064153	155064361	155063988	155064076	155064813	155064926	0.778	0.847667	0.985333	0.899	0.934667	0.942333	0.938	0.917667	0.871667	0.943	0.958667	0.928	0.937667	0.942333	0.977667	0.923667	0.924333	0.903667	0.880667	0.929	0.207333
Ahcyl2	chr6	+	29799438	29799584	29768527	29768906	29820328	29820634	0.772	1	1	1	0.911667	NA	NA	1	1	0.921333	1	1	1	1	1	1	0.899333	1	NA	NA	0.228
Ahcyl2	chr6	+	29799438	29799584	29768527	29768906	29870567	29870613	NA	NA	NA	NA	NA	NA	NA	NA	NA	NA	NA	NA	1	NA	1	NA	0.686	1	NA	NA	0.314
Ahcyl2	chr6	+	29820328	29820634	29799438	29799584	29863142	29863251	0.483333	0.789	0.685	0.720667	0.89	NA	NA	0.689333	0.541667	0.578	0.566333	0.483333	0.114	0.741667	0.709	NA	NA	NA	0.455667	0.267333	0.776
Ahi1	chr10	+	21007751	21007778	21000505	21000705	21017912	21018033	0.932667	0.917333	0.931	0.925	0.936	0.743667	0.913	0.881667	0.875333	0.897	0.947	0.890667	0.895	0.879	0.897	0.892667	0.92	0.848	0.906333	0.872	0.203333
Ahrr	chr13	-	74215742	74215804	74215371	74215510	74220540	74220737	1	NA	NA	1	NA	1	NA	1	1	0.882667	1	0.909333	NA	0.957667	1	0.982667	NA	0.932333	1	0.857333	0.142667
Ahrr	chr13	-	74229887	74229977	74224764	74224894	74257471	74257545	NA	1	NA	NA	1	NA	NA	1	1	0.914667	NA	1	1	1	0.89	0.983333	1	1	NA	NA	0.11
Ahsa2	chr11	-	23494978	23495064	23492217	23492306	23496765	23496881	NA	1	1	0.945667	NA	1	NA	NA	NA	1	1	1	1	1	1	1	0.968333	0.877667	NA	NA	0.122333
Ahsg	chr16	+	22894794	22894879	22894324	22894435	22895193	22895357	NA	NA	NA	NA	NA	NA	NA	NA	NA	NA	NA	NA	NA	NA	NA	NA	NA	NA	0.728	1	0.272
AI182371	chr2	-	35097887	35097939	35095760	35095923	35100854	35101008	1	NA	NA	NA	NA	NA	0.579667	NA	NA	NA	1	NA	1	NA	NA	NA	NA	NA	NA	NA	0.420333
AI314180	chr4	-	58905003	58905107	58879017	58879134	58911868	58911927	1	NA	NA	0.784333	0.738	1	NA	0.903667	0.588667	0.666667	0.784333	0.895333	NA	0.625	NA	NA	NA	0.784333	NA	0.948333	0.411333
AI314180	chr4	-	58905003	58905107	58879017	58879134	58912475	58912704	0.411333	0.588667	NA	0.5	0.625	0.519	0.886333	0.679667	0.667	0.481	0.740333	0.657333	0.606333	0.211667	0.755667	0.625	0.507333	0.329	0.671	0.628	0.674667
AI314180	chr4	-	58905003	58905107	58885367	58885498	58911868	58911927	0.671333	0.852333	0.66	0.603333	0.607667	0.653333	0.764	0.712	0.714333	0.560667	0.618667	0.476	0.569333	0.655	0.564	0.526	0.669333	0.618	0.661667	0.664	0.376333
AI314180	chr4	-	58905003	58905107	58885367	58885498	58911868	58911930	NA	NA	0.66	NA	0.607667	NA	0.764	NA	0.714333	NA	0.618667	NA	NA	NA	0.564	NA	NA	NA	NA	NA	0.2
AI314180	chr4	-	58905003	58905107	58885367	58885498	58912475	58912704	0.370667	0.457333	0.485	0.394	0.236667	0.335333	0.353667	0.356667	0.367333	0.297333	0.277667	0.325333	0.447	0.422	0.416333	0.325667	0.489667	0.390333	0.359	0.351667	0.253
AI413582	chr17	-	27564384	27564410	27564148	27564254	27564561	27564750	0.972333	0.969667	0.960667	1	0.947667	NA	0.913	0.896667	0.923	0.921667	0.896667	0.868	0.962	0.854333	0.860333	0.950667	0.848667	0.865667	0.910667	0.951667	0.151333
AI480526	chr5	-	123134623	123134717	123133722	123134430	123137954	123138109	0.729	NA	0.789	0.791667	0.658	0.938333	0.433	0.548	0.612333	0.485667	0.485	0.501667	0.641	0.66	0.759	0.581667	0.681667	0.634333	0.546333	0.604	0.505333
AI606473	chr3	+	154332358	154332505	154330820	154331063	154332913	154334254	NA	1	1	0.963333	NA	0.972	NA	0.985333	1	0.984	NA	0.976333	NA	0.892333	NA	0.955333	NA	0.961333	NA	1	0.107667
AI662270	chr11	+	83224209	83224310	83223575	83223651	83224451	83224631	NA	NA	NA	NA	NA	NA	NA	NA	NA	NA	NA	NA	NA	0.785333	NA	1	NA	NA	NA	NA	0.214667
AI662270	chr11	+	83224451	83224631	83223575	83223651	83225533	83226604	NA	NA	NA	NA	NA	NA	NA	1	NA	NA	NA	NA	NA	0.873667	NA	1	NA	1	NA	NA	0.126333
AI662270	chr11	+	83224451	83224631	83224209	83224310	83225533	83226604	NA	NA	NA	NA	NA	NA	NA	1	NA	0.890667	NA	1	NA	0.873667	NA	0.850333	NA	1	NA	NA	0.149667
AI987944	chr7	-	41388107	41388255	41376745	41376872	41393226	41393379	0.830667	0.873333	0.736	0.854	0.78	NA	0.666333	0.673	0.630333	0.779	0.735667	0.848	0.75	0.706	0.807	0.766	0.801667	0.734	0.765333	0.811667	0.243
Aida	chr1	+	183306423	183306477	183297569	183297628	183313660	183313724	NA	NA	NA	NA	NA	NA	NA	1	NA	NA	NA	NA	NA	0.892333	NA	1	NA	1	NA	1	0.107667
Aida	chr1	+	183306884	183306939	183306423	183306477	183313660	183313724	0.899333	0.912	0.976	0.929	0.967	0.963	0.980667	0.886	0.961	0.899333	0.973333	0.833333	0.948667	0.918333	0.959667	0.9	0.893667	0.951333	0.934667	0.890667	0.147333
Aif1	chr17	-	35171413	35171576	35170990	35171193	35171762	35171804	NA	1	NA	1	NA	0.829667	0.794667	0.951333	0.960333	1	0.891	0.964	1	0.855333	0.953	0.875	0.921667	0.93	1	0.904667	0.205333
Aif1	chr17	-	35171413	35171576	35170993	35171193	35171762	35171804	NA	NA	NA	NA	NA	NA	0.794667	NA	0.960333	NA	NA	NA	NA	NA	NA	NA	NA	NA	NA	NA	0.165667
Aif1	chr17	-	35171762	35171804	35170990	35171193	35172127	35172194	NA	1	NA	1	NA	0.849667	NA	NA	NA	NA	NA	1	NA	1	NA	NA	NA	NA	NA	0.977	0.150333
Aif1	chr17	-	35171762	35171804	35170993	35171193	35172127	35172194	NA	NA	NA	NA	NA	0.849667	1	NA	NA	NA	0.929667	1	1	NA	NA	NA	NA	NA	NA	0.977	0.150333
Aif1	chr17	-	35171762	35171939	35171522	35171576	35172127	35172194	NA	NA	NA	NA	NA	NA	1	NA	0.817667	1	1	NA	NA	NA	1	NA	NA	NA	NA	NA	0.182333
Aif1	chr17	-	35172514	35172689	35172284	35172346	35173140	35173275	NA	NA	NA	NA	NA	NA	0.620667	1	0.923	1	0.836667	1	0.680667	1	1	NA	0.710333	1	0.919333	1	0.379333
Aif1l	chr2	+	31962214	31962281	31950528	31950590	31969629	31969792	0.944667	0.922333	0.964	0.909333	0.940667	0.944667	0.927667	0.910333	0.927	0.929333	0.925	0.913667	0.910667	0.867333	0.932	0.878333	0.895667	0.835667	0.947667	0.940667	0.128333
Aif1l	chr2	+	31965070	31965112	31950462	31950590	31969629	31969792	0.854	0.750667	0.899667	0.771333	0.825333	0.850667	0.829	0.763333	0.812333	0.823	0.834	0.803	0.776667	0.691333	0.833	0.748	0.762667	0.636333	0.873667	0.838	0.263333
Aifm1	chrX	-	48503582	48503713	48499771	48499871	48513235	48513559	0.913667	1	0.85	0.895667	0.892	0.589333	0.864667	0.732	0.666667	0.751667	0.864667	0.951333	0.465333	0.512	0.285667	0.709667	0.776	0.646667	0.913667	0.536	0.714333
Aifm3	chr16	+	17491292	17491483	17489662	17489891	17491920	17492103	0.828333	NA	1	NA	1	NA	NA	NA	NA	NA	NA	NA	1	NA	NA	NA	NA	NA	0.966	0.959333	0.171667
Aifm3	chr16	+	17500489	17500534	17500288	17500398	17500746	17500843	0.878	NA	1	NA	NA	NA	NA	NA	NA	NA	NA	NA	NA	NA	NA	NA	NA	NA	0.969333	1	0.122
Aifm3	chr16	+	17503465	17503542	17502891	17502957	17503643	17503761	0.891	NA	NA	NA	1	NA	1	NA	NA	NA	NA	NA	NA	NA	NA	NA	NA	NA	0.922	0.886333	0.113667
Aifm3	chr16	+	17503465	17503542	17502893	17502957	17503643	17503761	0.891	NA	1	NA	1	NA	1	NA	1	NA	0.904	NA	NA	NA	0.883333	1	1	NA	NA	0.886333	0.116667
Aifm3	chr16	+	17503643	17503761	17502893	17502957	17506229	17506334	1	NA	NA	NA	NA	NA	NA	NA	NA	NA	NA	NA	NA	NA	NA	NA	NA	NA	0.869	1	0.131
Aifm3	chr16	+	17505683	17505759	17504917	17505016	17506229	17506334	0.959333	NA	1	NA	1	NA	NA	NA	1	NA	0.788	NA	NA	1	0.904333	0.794333	NA	1	0.974667	0.970667	0.212
Aifm3	chr16	+	17505683	17505759	17504917	17505016	17507126	17507485	1	NA	NA	NA	1	NA	NA	NA	NA	NA	NA	NA	NA	NA	NA	NA	NA	NA	0.892667	0.986333	0.107333
Aifm3	chr16	+	17506229	17506334	17504917	17505016	17507126	17507485	1	NA	NA	NA	NA	NA	NA	NA	1	NA	0.840333	NA	NA	NA	NA	NA	NA	NA	0.907	0.987333	0.159667
Aifm3	chr16	+	17506898	17506919	17506229	17506334	17507126	17507485	0.0363333	NA	0	NA	NA	NA	NA	NA	NA	NA	NA	NA	NA	0.333333	NA	NA	NA	NA	NA	0.0116667	0.333333
Aig1	chr10	-	13690523	13690639	13647668	13647706	13829242	13829398	NA	NA	NA	NA	NA	NA	1	NA	NA	NA	NA	NA	0.869667	NA	1	NA	1	NA	NA	1	0.130333
Aig1	chr10	-	13829242	13829398	13690523	13690639	13844180	13844286	NA	NA	NA	NA	1	NA	1	NA	1	NA	0.869667	1	NA	NA	NA	NA	1	NA	NA	NA	0.130333
Aig1	chr10	-	13829627	13829829	13829242	13829398	13861118	13861326	NA	NA	NA	NA	NA	NA	NA	0	NA	NA	NA	NA	NA	NA	NA	NA	NA	NA	0.477667	NA	0.477667
Aim1	chr10	-	44003427	44004890	43997051	43999347	44065724	44065857	1	NA	0.929	1	1	NA	1	0.746333	1	NA	0.938333	1	0.963333	1	1	NA	1	NA	1	1	0.253667
Aim1l	chr4	+	134082574	134082687	134082311	134082447	134087485	134087615	0.67	0.798667	0.846667	0.962333	0.827	0.504	0.974	0.882667	0.977	0.800667	0.971	0.504	0.989	0.901	0.982	0.781333	0.942333	0.595	0.845333	0.877	0.485
Aim1l	chr4	+	134087485	134087615	134082574	134082687	134088792	134088932	NA	NA	NA	1	NA	1	NA	1	1	0.896	1	0.887333	NA	NA	NA	NA	NA	NA	NA	NA	0.112667
Aim1l	chr4	+	134092049	134092209	134089271	134091236	134092318	134092501	0.963	1	0.903333	0.796333	0.939	NA	0.946	1	0.971	1	NA	NA	0.973	1	0.983	NA	0.992	1	0.953333	0.939667	0.203667
Aim2	chr1	+	173393962	173394033	173350878	173350973	173419456	173419555	NA	NA	0.425667	NA	0.520333	NA	0.414	0.545333	NA	0.633	NA	0.479667	NA	0.747333	NA	NA	NA	0.796333	NA	NA	0.382333
Aim2	chr1	+	173393962	173394033	173350878	173350973	173427758	173427898	0.0806667	NA	0.161667	NA	0.462667	NA	NA	0.14	0.046	0.279333	0	0.124	NA	0.37	NA	0	0.129667	0.155	0.212333	NA	0.462667
Aim2	chr1	+	173393962	173394033	173350878	173350973	173452827	173452948	0.440667	0.0376667	0.413333	0.155	0.578667	0.0156667	0.391667	0.290333	0.154333	0.307333	NA	0.111667	NA	0.363	NA	0.191	NA	0.245667	0.134333	NA	0.563
Aim2	chr1	+	173419456	173419555	173350878	173350973	173452827	173452948	0.351333	0.081	0.119333	NA	NA	NA	0.423667	NA	0.119333	0.069	0.475667	NA	NA	0.119333	NA	NA	NA	NA	0.0176667	NA	0.458
Aim2	chr1	+	173419456	173419555	173393962	173394033	173452827	173452948	NA	NA	0.0856667	NA	NA	NA	NA	NA	NA	NA	NA	NA	0.666667	NA	NA	NA	NA	NA	NA	NA	0.581
Aim2	chr1	+	173420570	173420686	173419456	173419555	173427758	173427898	1	NA	0.836333	0.780667	1	NA	0.666667	0.509	0.537	0.688	0.653	0.804	NA	NA	0.503	NA	NA	0.650333	NA	0.855	0.497
Aim2	chr1	+	173420570	173420686	173419456	173419555	173452827	173452948	0.735333	NA	NA	NA	NA	NA	NA	NA	0.869667	1	NA	NA	0.666667	NA	NA	NA	NA	NA	NA	NA	0.333333
Aim2	chr1	+	173427758	173427898	173350878	173350973	173452827	173452948	0.609333	0.597667	0.691667	0.619667	0.826667	0.403	0.699333	0.746333	0.705	0.697667	0.715333	0.650333	0.635667	0.667667	NA	0.793	1	0.652667	0.597667	0.659	0.597
Aim2	chr1	+	173427758	173427898	173393962	173394033	173452827	173452948	0.608333	0.986333	0.669	0.788	0.956	0.936333	0.946	0.864	0.936333	0.803333	0.941667	0.909667	0.828333	0.813333	NA	0.919333	0.913	0.861	1	0.946	0.391667
Aim2	chr1	+	173427758	173427898	173420597	173420686	173452827	173452948	1	1	NA	NA	1	1	0.946	0.9	1	0.924	0.958667	0.969333	0.773667	1	NA	0.957333	1	1	0.918	1	0.226333
Aim2	chr1	+	173454223	173454313	173452827	173452948	173455333	173455615	0.951	0.905	0.983	0.906667	0.975333	0.966	0.934333	0.920667	0.941	0.919667	1	0.977333	0.745667	0.884667	1	0.889	0.71	0.977333	0.905333	1	0.29
Aire	chr10	-	78034585	78034707	78034380	78034489	78036684	78036784	NA	NA	NA	NA	NA	NA	NA	NA	0.445333	NA	NA	NA	0.666667	0.867667	NA	NA	0.22	NA	NA	1	0.78
Aire	chr10	-	78034585	78035833	78034380	78034489	78036684	78036784	NA	NA	0.666667	NA	NA	NA	NA	NA	0.361	NA	NA	NA	0.666667	0.738333	NA	0.361	0.0586667	NA	0.706667	1	0.941333
Airn	chr17	+	12779289	12779512	12741384	12741424	12814495	12814717	0.189667	0.0136667	0.0526667	0.0323333	0.0536667	0.344	0.0843333	0.0933333	0.0416667	0.0586667	0.0476667	0.066	0.0746667	0.0616667	0.0493333	0.0443333	0.0293333	0.0653333	0.0246667	0.0513333	0.330333
Airn	chr17	+	12859106	12859252	12741310	12741424	12859540	12860122	0.712667	NA	0.814667	0.872	0.899333	0.666667	1	0.743667	0.883	0.869	0.583667	0.900333	0.918333	0.823667	0.691667	0.830333	0.823667	0.825	0.856667	0.968667	0.416333
Ajap1	chr4	-	153432047	153432853	153386425	153386513	153482128	153482811	NA	NA	NA	1	NA	1	NA	1	NA	0.800667	NA	0.768	1	1	1	0.849	1	0.902333	1	0.921	0.232
Ak5	chr3	-	152478340	152478457	152472756	152472948	152481537	152481701	0.854667	NA	0.907667	1	0.967667	1	1	0.953667	1	0.941	0.869333	0.836	NA	0.976	NA	0.969333	NA	1	1	NA	0.164
Ak7	chr12	+	105710144	105710336	105705981	105706266	105713502	105713611	NA	NA	NA	NA	NA	NA	1	NA	NA	NA	NA	NA	NA	1	NA	NA	NA	NA	0.666667	NA	0.333333
Ak8	chr2	+	28712274	28712388	28709926	28709976	28716416	28716485	1	NA	NA	NA	NA	NA	1	1	1	0.870333	NA	1	NA	NA	NA	1	NA	NA	0.838667	1	0.161333
Ak8	chr2	+	28716416	28716485	28709926	28709976	28733806	28733888	NA	NA	NA	NA	NA	NA	NA	NA	NA	NA	NA	NA	NA	NA	NA	NA	NA	NA	1	0.797333	0.202667
Ak8	chr2	+	28809659	28809740	28759941	28760083	28812827	28813165	1	NA	0.849333	NA	1	NA	1	0.881667	1	1	NA	1	NA	1	NA	NA	NA	NA	0.94	1	0.150667
Akap1	chr11	-	88843589	88843696	88841168	88841302	88843811	88843824	NA	NA	NA	NA	NA	NA	0.754667	NA	NA	NA	NA	NA	NA	0.872667	0.666667	0.666667	NA	NA	NA	1	0.333333
Akap10	chr11	-	61903906	61904030	61900309	61900446	61909847	61909946	0.894	0.897333	0.856667	0.819	0.848667	0.754	0.850333	0.791	0.816667	0.829333	0.851	0.809667	0.805667	0.857333	0.785	0.774333	0.791333	0.831	0.879333	0.751	0.146333
Akap10	chr11	-	61904774	61904859	61900309	61900446	61909847	61909946	0.799	0.834333	0.772333	0.739	0.755667	0.549333	0.812	0.780333	0.796333	0.801	0.854333	0.779667	0.697	0.732333	0.702333	0.626333	0.714	0.767667	0.870667	0.703667	0.321333
Akap11	chr14	-	78502189	78502236	78492245	78495946	78507724	78507880	1	NA	1	0.626333	1	0.961333	0.987	0.917	0.963	0.782	0.956	0.83	0.977	0.943333	1	0.946333	0.877	0.892667	1	1	0.373667
Akap11	chr14	-	78502938	78503022	78502189	78502236	78507724	78507880	0.419667	0.647	0.46	0.723333	0.439667	0.686667	0.445333	0.638	0.501333	0.765667	0.466	0.690667	0.384667	0.483667	0.423333	0.562333	0.403667	0.550667	0.548333	0.435333	0.381
Akap11	chr14	-	78502938	78503025	78502189	78502236	78507724	78507880	0.538333	0.754	0.507	0.797	0.560333	0.736667	0.520667	0.717333	0.579	0.819333	0.554667	0.764667	0.453	0.560667	0.482333	0.643	0.506333	0.617	0.606333	0.539	0.366333
Akap12	chr10	+	4353141	4357939	4313742	4313857	4358477	4359468	0.932333	1	0.96	1	0.900333	1	0.928667	1	0.934	1	1	0.879333	1	0.733333	1	0.935333	NA	1	1	1	0.266667
Akap13	chr7	+	75534807	75534851	75455556	75455748	75569883	75570031	0.965	NA	0.89	1	1	0.958333	1	0.987	1	1	0.977667	1	0.986	1	1	NA	1	NA	1	0.982667	0.11
Akap13	chr7	+	75679819	75679873	75677105	75677479	75683393	75683459	NA	NA	NA	NA	NA	1	1	0.935667	1	1	1	NA	0.912	1	0.753	1	1	0.967	0.846	0.786667	0.247
Akap13	chr7	+	75679819	75679873	75677105	75677479	75685116	75685309	0.117333	0.144667	0.137667	0.126333	0.0833333	0.171333	0.152	0.100333	0.0813333	0.128333	0.076	0.095	0.0986667	0.118	0.0353333	0.0823333	0.143333	0.091	0.137	0.0863333	0.136
Akap13	chr7	+	75683393	75683459	75679819	75679873	75685116	75685309	0.250667	NA	0.188667	0.107667	0.429333	0.211	0.340333	0.346333	0.313	0.127	0.412333	0.1	0.522333	0.115333	0.855667	0.434	0.109667	0.418333	0.377	0.380333	0.755667
Akap17b	chrX	-	36623567	36624336	36618602	36618733	36636472	36636574	0.539333	NA	0.573667	0.563333	0.909	0.479333	0.712	0.492	0.615667	0.703	0.565	0.572333	0.719333	0.943333	0.751	0.588667	0.750667	0.930333	0.623333	0.747333	0.464
Akap17b	chrX	-	36623567	36624336	36618602	36618733	36645049	36645395	0.901333	NA	0.846	1	0.921	0.861	0.896333	0.892333	1	1	0.961	1	1	0.823333	0.926	0.68	0.94	1	0.918333	0.941333	0.32
Akap17b	chrX	-	36636472	36636574	36618602	36618733	36645049	36645395	0.948667	NA	0.896	1	0.859667	0.886	0.930667	0.969333	1	1	0.985667	1	1	0.785	0.959	0.813667	0.944	1	0.964667	0.935	0.215
Akap7	chr10	-	25298134	25298228	25289598	25289730	25299039	25299107	NA	NA	NA	NA	NA	NA	NA	NA	NA	0.343667	NA	0.580333	NA	NA	NA	0.536333	NA	0.231	NA	NA	0.349333
Akap8	chr17	-	32317066	32317346	32316186	32316667	32318770	32318809	0.787	NA	0.721333	NA	0.821667	0.824667	NA	0.788667	NA	0.811667	0.907333	0.837333	NA	NA	NA	NA	NA	0.77	NA	NA	0.186
Akap8	chr17	-	32317845	32317878	32316186	32316667	32318770	32318809	0.664	0.670333	0.618	0.666667	0.748	0.735333	0.784667	0.733667	0.864333	0.751667	0.866	0.784333	0.83	0.691333	0.818667	0.730667	0.847667	0.729	0.699	0.834	0.248
Akap9	chr5	+	3954396	3954450	3951689	3951734	3954791	3954962	0.713	0.989333	0.904667	0.930667	0.885	1	0.878667	0.946333	0.881667	0.949333	0.933333	0.969667	0.895333	0.976333	0.889667	0.961333	0.825667	0.993333	0.689	0.496333	0.503667
Akap9	chr5	+	4001404	4001758	3992045	3992138	4005409	4005513	0.993667	NA	NA	NA	NA	NA	0.868667	0.971667	0.884667	NA	0.883	NA	0.894667	NA	NA	NA	NA	NA	0.941667	NA	0.125
Akap9	chr5	+	4003560	4003782	3992045	3992138	4005409	4005513	0.981333	NA	0.889333	0.905333	0.852	NA	0.800333	0.824667	0.889667	0.490667	0.84	0.574	0.807333	0.852667	0.785667	0.663	0.897	0.678333	0.907333	0.925	0.490667
Akap9	chr5	+	4004802	4004943	3992045	3992138	4005409	4005513	NA	NA	0.779	NA	NA	NA	0.787667	0.981333	0.831	0.943667	0.826333	0.933333	0.846667	0.976333	0.864	0.934	0.931667	0.957	0.945667	NA	0.202333
Akap9	chr5	+	4004802	4004943	4003560	4003782	4005409	4005513	0.565667	NA	0.244333	0.942	0.329333	0.993333	0.439333	0.961667	0.326667	0.935667	0.388667	0.929667	0.482667	0.915333	0.568667	0.911667	0.504333	0.943667	0.539	0.501667	0.749
Akip1	chr7	+	109704952	109705031	109703751	109704170	109707397	109707511	0.945	0.854	0.975333	0.943	0.916333	0.920667	0.964333	0.915333	0.918333	0.924333	0.918	0.941333	0.883	0.877333	0.950333	0.918667	0.960333	0.910667	0.940333	0.962	0.121333
Akip1	chr7	+	109704952	109705031	109703751	109704170	109708940	109708973	NA	NA	NA	NA	NA	NA	0.745	1	NA	NA	1	NA	NA	NA	NA	NA	NA	NA	1	NA	0.255
Aknad1	chr3	+	108756455	108756495	108751549	108752649	108756740	108756886	NA	NA	NA	NA	NA	NA	NA	NA	NA	0.917333	NA	0.973	NA	1	NA	0.897333	NA	1	NA	NA	0.102667
Akr1a1	chr4	-	116637975	116638048	116636509	116636669	116640990	116641142	NA	1	1	0.870667	1	NA	1	0.746667	1	1	NA	1	NA	1	NA	NA	1	NA	1	NA	0.253333
Akr1a1	chr4	-	116638960	116639160	116636509	116636669	116640990	116641142	NA	NA	NA	NA	NA	NA	NA	0.788667	NA	1	0.666667	NA	NA	1	NA	NA	NA	NA	1	NA	0.333333
Akr1a1	chr4	-	116639809	116640005	116637975	116638048	116641857	116641977	1	NA	NA	NA	NA	NA	NA	1	NA	NA	NA	NA	NA	NA	NA	NA	NA	NA	0.812667	1	0.187333
Akr1a1	chr4	-	116639809	116640005	116637975	116638048	116645503	116645593	NA	NA	NA	NA	NA	NA	NA	NA	NA	NA	NA	NA	NA	NA	NA	NA	1	0.76	NA	NA	0.24
Akr1c13	chr13	+	4192294	4192435	4191183	4191310	4194033	4194201	NA	NA	NA	NA	NA	NA	NA	NA	NA	0.151667	NA	0.164333	0.0633333	0.286667	NA	0.126667	0.106667	0.254333	0.357667	0.264	0.294333
Akr1c18	chr13	-	4143217	4143295	4142126	4142249	4144289	4144406	NA	NA	NA	NA	NA	NA	0.883	NA	1	NA	1	NA	0.561667	NA	1	NA	NA	NA	NA	1	0.438333
Akr1cl	chr1	-	65030567	65030688	65025562	65025730	65032585	65032686	NA	0.961333	NA	0.666667	NA	1	NA	0.823667	NA	0.558	NA	0.883333	NA	NA	NA	NA	NA	NA	NA	NA	0.442
Akt1	chr12	-	112657666	112657735	112657067	112657196	112659128	112659276	1	NA	NA	NA	NA	NA	NA	NA	NA	NA	NA	NA	NA	1	NA	0.886333	NA	1	0.666667	1	0.333333
Akt1	chr12	-	112658397	112658463	112657267	112657393	112659128	112659276	NA	NA	NA	NA	NA	NA	1	NA	NA	NA	NA	NA	0.798667	1	NA	0.666667	NA	NA	NA	NA	0.333333
Akt1s1	chr7	+	44853761	44853857	44852570	44852959	44854591	44854686	NA	NA	NA	NA	NA	NA	NA	1	NA	NA	1	0.666667	NA	NA	0.876333	NA	1	NA	NA	NA	0.333333
Akt2	chr7	+	27607242	27607405	27605816	27605937	27608622	27608753	0.721667	NA	0.767667	0.721667	0.867667	NA	0.84	0.593667	0.925333	0.469333	0.44	0.7	0.821667	NA	0.283	0.522	0.619667	0.798	0.566	0.552667	0.642333
Akt2	chr7	+	27608622	27608753	27592457	27592829	27628836	27628990	NA	NA	NA	NA	NA	NA	NA	NA	NA	NA	1	0.85	NA	NA	NA	NA	NA	NA	NA	NA	0.15
Akt3	chr1	-	177109626	177109738	177096966	177097098	177248675	177248881	0.892667	NA	NA	NA	NA	NA	NA	NA	NA	NA	1	NA	NA	NA	NA	NA	NA	NA	NA	0.781667	0.218333
Aldh16a1	chr7	-	45149300	45149766	45148613	45148740	45154391	45154526	0.931667	0.892	0.978667	0.892333	0.923333	0.834667	0.929	0.764667	0.913667	0.866667	0.936333	0.834333	0.938	0.721333	0.912	0.872667	0.921	0.9	0.923667	0.841333	0.257333
Aldh18a1	chr19	-	40585489	40585605	40574210	40574369	40588309	40588410	NA	NA	NA	NA	NA	NA	NA	NA	NA	NA	NA	NA	NA	1	NA	NA	NA	0.836333	NA	NA	0.163667
Aldh18a1	chr19	-	40585489	40585605	40577771	40577921	40588309	40588410	NA	NA	NA	NA	NA	NA	NA	1	NA	NA	NA	NA	NA	NA	NA	NA	NA	NA	0.761333	NA	0.238667
Aldh1a1	chr19	+	20624711	20624825	20623324	20623453	20629053	20629156	NA	NA	NA	NA	NA	NA	1	0.798333	NA	1	NA	1	NA	1	NA	NA	NA	NA	1	NA	0.201667
Aldh1l2	chr10	-	83503941	83504196	83502441	83502529	83506597	83506748	NA	NA	NA	0.832333	NA	1	NA	1	NA	1	NA	0.879	0.666667	1	NA	1	NA	0.953	NA	1	0.333333
Aldh1l2	chr10	-	83508612	83508732	83508014	83508142	83512289	83512437	NA	NA	NA	0.951333	NA	1	NA	1	0.835	0.974667	1	1	1	0.970333	1	1	NA	0.972	NA	1	0.165
Aldh2	chr5	-	121575895	121576024	121573422	121573525	121579603	121579666	NA	NA	NA	NA	NA	NA	NA	NA	NA	0.443333	NA	NA	NA	0.333333	NA	NA	NA	NA	NA	NA	0.11
Aldh3a2	chr11	-	61247928	61248041	61244852	61246321	61248861	61249097	0.250333	0.233	0.221333	0.237	0.259667	0.232333	0.244333	0.211	0.268333	0.231	0.219667	0.242333	0.235	0.23	0.213667	0.190333	0.156667	0.177333	0.255333	0.245333	0.111667
Aldh3a2	chr11	-	61266853	61267014	61265223	61265295	61267238	61267441	0.898667	1	1	0.953333	0.917667	1	0.958333	0.947	0.943	0.971667	0.935667	0.963	0.913667	0.890333	0.956333	0.929	1	0.843333	0.957667	0.948333	0.156667
Aldh3b1	chr19	-	3921696	3921807	3921472	3921593	3923738	3923901	NA	NA	NA	NA	NA	NA	NA	1	NA	1	NA	0.782	NA	NA	NA	NA	NA	1	NA	NA	0.218
Aldh4a1	chr4	+	139643389	139643542	139642513	139642561	139644111	139644233	0.899333	0.856333	0.933333	0.939	0.907333	0.904	0.926333	0.915667	0.913667	0.869	0.921333	0.851333	0.923	0.871667	0.952667	0.885667	0.920667	0.813333	0.914	0.907	0.139333
Aldoa	chr7	-	126797973	126798126	126797643	126797776	126800001	126800036	0.735	0.824	0.792667	0.758667	0.771667	0.850667	0.795667	0.701	0.793333	0.678333	0.849667	0.675333	0.913	0.662	0.919667	0.634667	0.911333	0.721	0.659667	0.781667	0.285
Aldoc	chr11	+	78325048	78325209	78324908	78324963	78325328	78325412	1	0.862333	1	1	1	0.932333	0.978667	0.946667	0.992	1	1	0.975667	1	1	1	NA	NA	1	0.995333	1	0.137667
Alg13	chrX	+	144336111	144336463	144322011	144322150	144337091	144337175	1	1	0.991	1	0.995333	0.984333	0.977333	0.994	1	1	0.97	0.987333	0.899333	1	0.978	1	0.923667	1	1	0.918667	0.100667
Alg13	chrX	+	144339724	144339771	144322011	144322150	144340719	144340792	NA	NA	NA	NA	NA	NA	NA	NA	NA	NA	NA	NA	NA	NA	0.827	NA	1	0.889	NA	NA	0.173
Alg13	chrX	+	144349291	144349419	144345611	144345720	144350282	144350529	0.968	0.896	0.969333	0.970667	0.965667	0.982333	0.983667	0.966667	0.980667	0.942	0.972333	0.941	0.982333	0.982	0.973	0.943667	0.961667	0.974333	0.956333	1	0.104
Alg13	chrX	+	144355583	144355652	144353572	144353628	144356795	144356961	0.81	0.817667	0.830667	0.776	0.849	0.879	0.848333	0.800667	0.832	0.779333	0.777333	0.829333	0.867	0.878667	0.802	0.875	0.85	0.882667	0.796333	0.867	0.106667
Alg14	chr3	+	121298588	121298758	121291797	121291983	121320079	121320197	0.838	0.829667	0.874	0.861333	0.872667	0.870667	0.883667	0.811333	0.89	0.774	0.85	0.802333	0.839667	0.873	0.877333	0.803333	0.877333	0.788667	0.858333	0.867667	0.116
Alg3	chr16	-	20608485	20608646	20607763	20607884	20608741	20608889	0.876333	0.821	0.896667	0.872333	0.849667	0.930667	0.874	0.895667	0.879667	0.921333	0.894667	0.889	0.911333	0.916667	0.909333	0.919667	0.860333	0.868333	0.903	0.914667	0.109667
Alg3	chr16	-	20608741	20608889	20607763	20607884	20610542	20610731	0.903	0.923667	0.943	0.840667	0.958667	0.989333	0.900333	0.784333	0.840667	0.828	0.872333	0.821	0.911333	0.846	0.886	0.855667	0.898333	0.907	0.851333	0.936	0.205
Alg3	chr16	-	20608986	20609086	20608741	20608889	20610542	20610768	0.846	0.847333	0.818667	0.887667	0.862667	0.846333	0.808	0.878667	0.849333	0.855	0.810667	0.881	0.818667	0.903667	0.805333	0.948333	0.848667	0.883	0.851	0.843333	0.143
Alg6	chr4	+	99738123	99738213	99726862	99726947	99739213	99739302	0.819333	0.937	0.917333	0.985667	0.914667	0.927333	0.833667	0.936	0.858667	0.944333	0.872333	0.955333	0.911667	1	0.963667	0.938333	0.954	0.929333	0.873667	0.949667	0.180667
Alg6	chr4	+	99738123	99738213	99726862	99726947	99744489	99744625	NA	NA	NA	0.329667	NA	NA	NA	0.299	0.461	0.389333	NA	0.246	0.433667	0.344333	NA	0.376667	NA	NA	0.352333	0.440333	0.215
Alg6	chr4	+	99738123	99738213	99726862	99726947	99746325	99746411	NA	NA	NA	NA	NA	NA	NA	NA	NA	NA	NA	0.852	NA	0.661333	NA	0.792	0.865333	0.846	NA	NA	0.204
Alg6	chr4	+	99738123	99738213	99726862	99726947	99748685	99748770	NA	NA	NA	0.491333	0.715667	NA	0.719333	0.561	0.755333	0.553667	0.753	0.586	NA	NA	NA	0.677	0.782667	NA	NA	NA	0.291333
Alg6	chr4	+	99739213	99739302	99726862	99726947	99741533	99741616	0.971	1	1	0.979333	0.929	0.976	0.987667	1	0.919333	0.938333	0.875333	0.916667	0.972333	0.934333	0.938	1	0.977	1	0.937	0.981667	0.124667
Alg6	chr4	+	99739213	99739302	99726862	99726947	99742354	99742419	0.864667	NA	0.789667	NA	NA	NA	1	NA	1	NA	0.915	NA	NA	1	NA	1	NA	NA	NA	NA	0.210333
Alg6	chr4	+	99739213	99739302	99726862	99726947	99744489	99744625	0.082	NA	NA	0	NA	NA	0.101333	0.0266667	0.136667	0.0583333	NA	0.01	0.109667	0.0193333	0.079	0.076	0.0326667	0.0476667	0.072	0.0216667	0.136667
Alg6	chr4	+	99739213	99739302	99726862	99726947	99746325	99746411	NA	NA	NA	NA	NA	NA	NA	NA	NA	0.359333	NA	NA	NA	0	NA	0.255	NA	0.203	NA	NA	0.359333
Alg6	chr4	+	99741533	99741616	99726862	99726947	99744489	99744625	0.0216667	0.0303333	0	0.00833333	0.039	0	0.043	0	0.113333	0.034	0.0616667	0.0263333	0.0883333	0.032	0.0516667	0.0503333	0.0356667	0.0573333	0.045	0.031	0.113333
Alg6	chr4	+	99741533	99741616	99726862	99726947	99746325	99746411	NA	NA	NA	NA	0.515333	NA	0.333333	0.160667	0.616333	0.307	0.5	0.202	0.125	0.131	0.666667	0.0436667	0.202	0	0.640333	NA	0.666667
Alg6	chr4	+	99741533	99741616	99726862	99726947	99748685	99748770	0.062	0	0.0686667	0.0356667	0.0646667	NA	0.021	0	0.144	0.047	0.303	0.110333	0	0.146	0.182	0.021	0.120667	0.169333	0.176667	0.049	0.303
Alg6	chr4	+	99744489	99744625	99726862	99726947	99746325	99746411	0.975	0.922333	0.968667	0.950667	0.972333	0.941333	0.966667	0.955333	0.979333	0.972333	0.958	0.959667	0.944667	0.859667	0.944	0.906667	0.935667	0.942	0.989	0.964	0.129333
Alg6	chr4	+	99748685	99748770	99726862	99726947	99761870	99762311	NA	1	NA	NA	NA	NA	0.935333	0.865667	1	NA	NA	0.706333	0.916333	NA	0.696667	NA	NA	NA	NA	0.916333	0.303333
Alg6	chr4	+	99748685	99748770	99726862	99726947	99761870	99763460	0.897	1	0.683	0.791	0.916333	NA	0.935333	0.865667	1	0.712	0.824	0.706333	0.916333	0.656667	0.696667	0.607	0.769667	0.739333	0.743	0.916333	0.393
Alg6	chr4	+	99750728	99750799	99748685	99748770	99761870	99763460	NA	NA	NA	NA	0.794	NA	0.946333	NA	0.979667	NA	0.942	0.894333	NA	NA	NA	NA	0.955333	NA	NA	NA	0.185667
Alg9	chr9	+	50783257	50783328	50778969	50779104	50788152	50788241	0.771	0.792	0.695667	0.757667	0.696	0.627333	0.796	0.778333	0.778	0.767	0.832333	0.712	0.8	0.656333	0.779	0.740333	0.796667	0.647333	0.798667	0.818	0.205
Alg9	chr9	+	50783257	50783328	50778969	50779104	50789496	50789632	NA	NA	NA	NA	0.928667	NA	0.971667	0.927333	0.978667	NA	0.990667	0.906333	0.976	0.967333	NA	0.867333	0.984333	0.77	NA	0.954667	0.220667
Alkbh1	chr12	-	87441270	87441343	87438396	87438559	87441642	87441780	NA	0.912	0.732	0.725667	0.878667	0.801333	NA	NA	NA	0.938333	NA	0.971667	NA	0.876667	NA	0.838333	0.936667	0.964667	NA	NA	0.246
Alkbh1	chr12	-	87441270	87441343	87440305	87440414	87441642	87441780	0.364333	0.299	0.280667	0.309667	0.266667	0.518667	0.475	0.301	0.331667	0.383333	0.365	0.323333	0.351	0.342333	0.323667	0.267333	0.311	0.378333	0.28	0.304333	0.252
Alkbh1	chr12	-	87441270	87441343	87440305	87440414	87443641	87443836	0.117	0.149667	0.118667	0.135667	0.079	0.164333	0.158667	0.126667	0.106667	0.114667	0.143667	0.118333	0.156667	0.150333	0.144333	0.115	0.211	0.153333	0.097	0.212333	0.133333
Alkbh1	chr12	-	87441642	87441780	87438396	87438559	87443641	87443826	0.848333	0.782333	0.843	0.785	0.862667	0.804	0.914333	0.833667	0.805333	0.849667	0.869667	0.802667	0.870667	0.885667	0.874333	0.865333	0.887333	0.830667	0.802333	0.803333	0.132
Alkbh1	chr12	-	87441642	87441780	87440305	87440414	87443641	87443826	0.413	0.524667	0.497	0.475333	0.478667	0.465333	0.408	0.44	0.428667	0.366	0.393	0.431333	0.576	0.560333	0.542667	0.528	0.609667	0.525667	0.380333	0.609	0.243667
Alkbh3	chr2	-	94001424	94001513	93996182	93996392	94003052	94003156	0.733667	0.744	0.671667	0.740333	0.665333	0.752	0.724	0.754667	0.718333	0.697333	0.694667	0.685	0.725667	0.833667	0.711	0.784667	0.816	0.830333	0.657	0.647667	0.186
Alkbh3	chr2	-	94003052	94003156	93981515	93981614	94008038	94008126	NA	NA	NA	NA	NA	NA	NA	NA	NA	1	NA	1	NA	0.807	1	0.588667	NA	0.816667	NA	NA	0.411333
Alkbh3	chr2	-	94003052	94003156	93996246	93996392	94008038	94008126	NA	NA	NA	NA	NA	1	NA	0.916	NA	0.931	0.987667	0.972667	NA	NA	0.963667	0.863333	NA	0.951	NA	NA	0.136667
Alkbh3	chr2	-	94004732	94004780	93996182	93996392	94008038	94008142	NA	NA	NA	NA	NA	NA	NA	NA	0.666667	NA	NA	NA	0.421667	NA	NA	0	NA	NA	0.0883333	0.333333	0.666667
Alkbh3	chr2	-	94006846	94006881	94004732	94004780	94008038	94008142	0.985	1	1	0.971	0.949	0.874333	0.988333	0.978	0.983333	0.975333	0.996	0.969667	0.963667	0.995	0.979	0.981333	NA	0.978333	0.974667	0.974	0.125667
Alkbh3	chr2	-	94010262	94010408	94008423	94008592	94010682	94010754	0.539667	0.454667	0.514667	0.485667	0.527667	0.599667	0.508333	0.502333	0.509	0.523	0.535333	0.547333	0.412667	0.443333	0.380667	0.446333	0.381	0.414	0.489333	0.457	0.219
Alkbh7	chr17	+	56998388	56998562	56997342	56997567	56998670	56998795	0.931	0.951667	0.926667	0.905667	0.948	0.782333	0.911	0.91	0.936333	0.910667	0.928	0.918333	0.958667	0.917	0.916333	0.893667	0.937333	0.939333	0.927667	0.942333	0.176333
Alkbh8	chr9	+	3338455	3338591	3335472	3335594	3343014	3343252	0.952333	0.864	0.974667	0.958	0.962	0.974333	0.962667	0.941333	0.996667	0.971667	0.977667	0.979667	0.983667	0.973	0.978333	1	0.973667	1	0.970333	NA	0.136
Alkbh8	chr9	+	3338455	3338591	3335477	3335594	3343014	3343252	0.952333	0.864	NA	NA	0.962	0.974333	0.962667	NA	0.996667	0.971667	NA	0.979667	0.983667	0.973	0.978333	NA	0.973667	1	0.970333	0.978333	0.136
Alkbh8	chr9	+	3347261	3347409	3345780	3345876	3349419	3349490	0.631	NA	0.203333	NA	1	NA	0.660667	NA	NA	NA	NA	NA	NA	NA	NA	NA	NA	NA	0.315333	NA	0.796667
Alms1	chr6	+	85627918	85629714	85624583	85624717	85641318	85641548	NA	1	1	0.89	NA	1	NA	1	NA	1	1	0.973667	1	0.931	1	0.94	NA	1	NA	1	0.11
Alms1-ps1	chr6	+	85726523	85727676	85721924	85722014	85748750	85748868	NA	NA	1	NA	NA	NA	1	0.696333	0.831333	1	NA	1	1	NA	1	1	NA	1	1	1	0.303667
Alox12b	chr11	+	69166229	69166316	69165850	69166054	69166773	69166943	NA	NA	NA	NA	NA	NA	NA	NA	NA	NA	NA	NA	NA	1	NA	0.847	NA	1	NA	NA	0.153
Alox5ap	chr5	+	149279175	149279246	149272380	149272480	149285343	149285425	1	0.804667	NA	0.896333	NA	1	1	0.973	NA	0.939667	1	0.988667	1	0.987	1	0.943333	NA	1	1	1	0.195333
Aloxe3	chr11	+	69135005	69135175	69134456	69134543	69135871	69135993	NA	NA	NA	NA	0.666667	NA	1	0.766	1	NA	NA	NA	NA	0.853333	NA	NA	NA	1	1	0.819667	0.333333
Alpk1	chr3	-	127677685	127677839	127673319	127673482	127679360	127681452	0.769667	NA	0.837333	0.897	0.905	NA	0.859667	0.914333	0.946333	1	0.887	0.936667	0.968	0.837667	0.873333	0.784333	0.900333	0.949333	0.891	0.898667	0.230333
Alpk1	chr3	-	127684341	127684437	127679360	127681452	127695553	127695752	NA	NA	NA	NA	NA	NA	NA	NA	0.333333	NA	NA	NA	NA	NA	1	NA	NA	NA	NA	NA	0.666667
Alpk1	chr3	-	127685237	127685314	127684341	127684437	127686256	127686343	0.614	NA	0.655333	NA	0.853333	NA	0.771667	0.614667	0.725667	0.883333	0.797667	0.822333	0.781333	0.554	0.513	0.681333	0.641333	0.729333	0.697	0.515	0.370333
Alpk1	chr3	-	127685237	127685314	127684341	127684437	127695553	127695752	0.851	NA	0.794	NA	NA	NA	0.969333	0.723333	0.820667	0.460667	0.727333	0.929333	0.774333	0.498333	0.292333	NA	0.487333	0.721667	NA	0.874333	0.677
Alpk1	chr3	-	127724374	127724529	127695553	127695752	127729270	127729501	1	NA	1	1	0.927	NA	0.949333	0.633667	0.856667	0.630333	0.943333	0.811667	0.974333	0.929333	0.904333	0.979333	0.941	1	1	0.945	0.369667
Alpk1	chr3	-	127724374	127724529	127695553	127695752	127780160	127780527	NA	NA	NA	NA	NA	NA	0.857667	1	1	NA	1	NA	1	NA	NA	NA	NA	NA	1	NA	0.142333
Alpk3	chr7	+	81098746	81099021	81095657	81095693	81100170	81100259	NA	NA	0.895333	NA	1	NA	NA	NA	NA	NA	NA	NA	NA	NA	NA	NA	NA	NA	NA	NA	0.104667
Alpl	chr4	-	137758571	137758732	137755629	137755749	137796241	137796384	0.972667	0.883333	0.974333	1	0.978333	0.971667	0.971667	0.986667	1	0.966333	0.931	0.986667	1	0.975667	0.976667	0.968667	1	0.971	0.984333	0.974667	0.116667
Als2cl	chr9	+	110880341	110880457	110879869	110880229	110882713	110882722	NA	NA	NA	NA	1	NA	0.561333	0.339	0.617	NA	NA	NA	NA	NA	1	0.509333	NA	0.117667	0.671333	0.881667	0.882333
Als2cl	chr9	+	110882713	110882823	110880173	110880229	110884014	110884146	1	NA	NA	NA	0.909	NA	1	NA	1	NA	0.929333	1	0.857	1	1	NA	1	NA	1	0.958	0.143
Als2cl	chr9	+	110885387	110885453	110884866	110885065	110885782	110885948	1	NA	1	NA	1	NA	1	1	0.831667	1	0.831667	1	1	0.878	1	1	1	1	0.937667	1	0.168333
Als2cl	chr9	+	110885387	110885453	110884866	110885065	110886405	110886537	1	NA	NA	NA	NA	NA	1	1	0.798667	1	NA	0.922	NA	NA	NA	1	0.946667	1	0.967333	1	0.201333
Als2cl	chr9	+	110885782	110885948	110884866	110885065	110886405	110886537	1	NA	1	NA	0.666667	NA	1	1	0.894	1	0.820667	0.854333	NA	NA	0.820667	NA	0.854333	NA	0.96	1	0.333333
Als2cl	chr9	+	110885782	110885948	110885387	110885453	110886405	110886537	1	NA	1	NA	0.912	NA	0.771	0.925	0.931333	1	0.937	0.800667	0.854333	0.870667	1	0.952333	1	0.961667	0.880333	0.965333	0.229
Als2cl	chr9	+	110889104	110889301	110888685	110888752	110889706	110889772	1	NA	0.953667	0.652667	1	NA	0.921	1	1	1	0.862	0.951	1	0.966333	1	0.939	0.925667	1	1	0.961333	0.347333
Als2cl	chr9	+	110894295	110894392	110893986	110894160	110894565	110894723	0.825	0.861667	0.762	0.691667	0.820333	NA	0.820667	0.636667	0.739333	0.881333	0.546	0.659333	0.581667	0.652667	0.882333	0.605333	0.555	0.510333	0.77	0.420333	0.462
Alx1	chr10	-	103028380	103028847	103025134	103025439	103028929	103029054	NA	1	NA	NA	NA	1	1	0.996333	0.765667	1	1	0.994333	1	0.990333	NA	0.998667	1	0.988	1	1	0.234333
Ambra1	chr2	+	91805023	91805110	91772290	91773747	91810029	91810209	0.781	NA	0.783333	0.769333	0.821667	0.650667	0.747	0.690667	0.762333	0.700667	0.710667	0.693	0.775333	0.733333	0.796667	0.675667	0.761667	0.697	0.700667	0.754333	0.171
Ambra1	chr2	+	91805023	91805110	91772290	91773747	91810029	91810969	0.781	0.764667	0.783333	0.769333	NA	0.650667	0.747	NA	NA	NA	NA	NA	NA	NA	NA	NA	NA	NA	NA	NA	0.132667
Ambra1	chr2	+	91824459	91824540	91772290	91773747	91875715	91875826	1	NA	NA	NA	NA	NA	1	1	0.792667	NA	1	1	NA	1	NA	0.893333	NA	NA	0.792667	0.666667	0.333333
Amd1	chr10	-	40291993	40292036	40290377	40290615	40301748	40302188	1	NA	NA	NA	NA	NA	0.842333	1	0.813333	NA	0.956667	NA	1	NA	NA	NA	NA	NA	0.809	NA	0.191
Amd1	chr10	-	40293163	40293266	40291993	40292036	40294180	40294307	1	0.895667	NA	1	NA	NA	NA	1	NA	NA	NA	NA	NA	NA	NA	NA	NA	NA	NA	NA	0.104333
Amd1	chr10	-	40293163	40293266	40291993	40292036	40301748	40302188	0.859333	1	1	NA	1	NA	0.917	1	1	1	1	NA	0.817	1	1	NA	1	NA	1	1	0.183
Amd1	chr10	-	40294180	40294307	40293163	40293266	40301748	40302188	0.447	NA	NA	NA	0.777333	NA	0.777333	NA	0.675	NA	NA	NA	NA	NA	NA	NA	NA	NA	0.399667	NA	0.377667
Amd1	chr10	-	40294716	40294803	40293163	40293266	40301748	40302188	0.613333	1	NA	1	0.847	NA	0.790333	1	0.749667	0.742667	NA	1	NA	NA	0.666667	1	NA	NA	0.67	NA	0.386667
Amd1	chr10	-	40294716	40294803	40294180	40294307	40301748	40302188	0.894667	0.972667	NA	1	1	1	0.879667	1	0.921333	1	1	0.935	1	1	1	0.832	NA	1	0.870333	0.958667	0.168
Amh	chr10	+	80806023	80806166	80805247	80805650	80806343	80806452	NA	NA	NA	NA	NA	NA	0.666667	1	1	NA	NA	1	NA	NA	NA	NA	NA	NA	NA	NA	0.333333
Amhr2	chr15	+	102452386	102452559	102452148	102452263	102452744	102452892	NA	NA	NA	NA	NA	NA	NA	NA	NA	NA	NA	NA	NA	1	NA	1	NA	NA	NA	0.333333	0.666667
Amn1	chr6	-	149169302	149169404	149157598	149157831	149170832	149171050	NA	NA	NA	NA	1	NA	1	0.722333	1	1	0.785	0.738667	NA	NA	NA	NA	1	1	0.935	1	0.277667
Amn1	chr6	-	149169302	149169404	149166805	149166917	149170832	149171050	1	NA	1	0.972333	NA	1	0.944	1	1	1	1	0.935	1	NA	1	NA	0.896	1	1	NA	0.104
Amn1	chr6	-	149170832	149171050	149166805	149166917	149184991	149185124	0.807333	NA	NA	NA	NA	NA	1	NA	NA	NA	NA	NA	NA	NA	NA	NA	NA	NA	NA	NA	0.192667
Amn1	chr6	-	149183393	149183538	149170832	149171050	149188235	149188685	0.836667	0.901667	0.896667	0.974	0.960667	0.910667	0.984	0.913333	0.972333	0.98	0.961333	0.958	0.967333	0.886667	0.960333	0.956667	0.974333	0.932	0.974667	0.922667	0.147333
Amn1	chr6	-	149183393	149183538	149170832	149171050	149188605	149188695	0.819	0.832	0.839333	0.881667	0.862667	0.834333	0.839667	0.779667	0.845333	0.736667	0.777667	0.776333	0.768667	0.808667	0.808	0.757667	0.88	0.756333	0.843333	0.794	0.145
Amn1	chr6	-	149184991	149185124	149170832	149171050	149188235	149188685	0.803333	0.666667	0.845333	0.971333	0.899	0.916667	0.960667	0.842333	0.927	0.964	0.887667	0.881333	0.962667	0.879667	0.960667	0.947333	0.976333	0.872667	0.938667	0.917333	0.309667
Amn1	chr6	-	149184991	149185124	149170832	149171050	149188471	149188687	0.907	0.924	0.931667	0.964	0.958333	0.914667	0.972667	0.817333	1	0.973667	0.871	0.965667	1	1	NA	1	1	0.801667	0.814667	0.960333	0.198333
Amn1	chr6	-	149184991	149185124	149170832	149171050	149188605	149188712	0.72	0.635333	0.739333	0.735	0.714333	0.708	0.622	0.493667	0.671333	0.400333	0.578	0.436333	0.67	0.725333	0.744	0.657333	0.854	0.603333	0.662333	0.714	0.453667
Amn1	chr6	-	149184991	149185124	149183393	149183538	149188605	149188712	0.633667	0.424	0.589333	0.518333	0.664333	0.680333	0.563667	0.598	0.671333	0.538333	0.647	0.54	0.574333	0.561	0.595333	0.551333	0.585333	0.553	0.670667	0.690333	0.266333
Amot	chrX	-	145486764	145487656	145480004	145480458	145496988	145497051	0.355667	NA	0.441667	0.326667	0.445667	0.310667	0.356667	0.307	0.418667	0.360667	0.421667	0.327667	0.41	0.286	0.371667	0.333667	0.348	0.413	0.355667	0.304	0.159667
Amot	chrX	-	145489823	145489972	145480004	145480458	145496988	145497051	NA	0.430667	0.513333	0.409	0.505	NA	0.512333	0.479667	0.611667	0.513333	0.586333	0.522	NA	0.327333	0.419	0.427333	0.407667	0.472667	0.522667	NA	0.284333
Amotl2	chr9	+	102716962	102717086	102716801	102716811	102720080	102720876	0.349333	NA	0.451	NA	0.458667	NA	0.414333	0.467	0.468333	NA	0.339333	0.148667	0.429667	0.631	0.448333	0.388	0.495667	0.330333	0.432333	0.680667	0.532
Ampd3	chr7	+	110788609	110788814	110777798	110778024	110791187	110791347	1	NA	NA	NA	NA	NA	0.924333	1	1	1	1	0.884667	1	1	NA	NA	NA	1	1	0.825333	0.174667
Ampd3	chr7	+	110795678	110795808	110793639	110793859	110800642	110800837	0.978667	NA	1	NA	1	NA	1	1	NA	1	1	0.877333	1	0.883	NA	1	NA	1	0.963667	0.890333	0.122667
Ampd3	chr7	+	110805963	110806084	110804824	110804988	110807779	110807953	0.936333	1	1	0.868	1	NA	1	1	NA	1	1	1	1	1	1	0.968667	0.947	0.922667	0.992667	1	0.132
Amph	chr13	+	19125025	19125148	19121274	19121319	19137535	19137742	0.959333	NA	0.958667	1	0.884667	NA	1	0.867333	1	0.924	0.830667	1	0.860667	1	1	0.976333	0.839	0.933667	0.959	0.873667	0.169333
Amph	chr13	+	19125025	19125148	19121274	19121331	19137535	19137742	1	NA	1	NA	0.956	NA	1	1	NA	NA	1	NA	1	0.834	NA	1	NA	1	0.99	1	0.166
Amy1	chr3	-	113562627	113562761	113561823	113561946	113563444	113563675	NA	NA	NA	NA	NA	NA	NA	1	NA	0.775333	NA	1	NA	NA	NA	1	NA	NA	NA	NA	0.224667
Anapc1	chr2	-	128684501	128684663	128679519	128679602	128687152	128687391	NA	NA	NA	NA	NA	NA	NA	1	NA	NA	NA	NA	NA	NA	NA	NA	NA	NA	0.666667	NA	0.333333
Anapc13	chr9	+	102629546	102629577	102626662	102626687	102629762	102629888	0.053	0.129667	0.049	0	0.058	NA	0.0963333	0.0143333	0	0.0323333	0.0133333	0.0256667	0.0576667	0.015	0	0.018	0.0236667	0	0.021	0	0.129667
Anapc15	chr7	+	101897188	101897360	101896862	101896943	101897732	101897817	0.859667	0.921	0.907667	0.856667	0.949667	0.883333	0.918667	0.958667	0.96	0.987333	0.895333	0.895	0.889333	0.962333	0.956	0.962667	1	0.96	0.936667	0.864333	0.143333
Anapc15	chr7	+	101897188	101897360	101896862	101896943	101897941	101898028	1	NA	NA	1	1	0.746667	0.852667	0.892667	NA	1	1	1	NA	1	NA	0.765333	NA	1	NA	0.905333	0.253333
Anapc15	chr7	+	101897732	101897787	101896339	101896450	101897946	101898071	0.566667	0.774333	0.526333	0.729333	0.67	0.815667	0.464	0.740333	0.583667	0.562333	0.567333	0.612667	0.738667	0.658333	0.519333	0.691333	0.429333	0.738667	0.762	0.374	0.441667
Anapc16	chr10	-	60002417	60002467	59990832	59990907	60002955	60002995	0.335	0.234333	0.305	0.220333	0.251	0.133333	0.218333	0.173667	0.263667	0.154333	0.237	0.224333	0.218333	0.177	0.218333	0.188333	0.273333	0.139	0.251667	0.235	0.201667
Anapc16	chr10	-	60002417	60002467	59996447	59996614	60002955	60002995	0.158	0.210667	0.156667	0.176	0.118	0.161333	0.121	0.129333	0.119667	0.109667	0.123333	0.123667	0.112333	0.0806667	0.087	0.073	0.117333	0.086	0.125667	0.0906667	0.137667
Anapc2	chr2	+	25279171	25279313	25277635	25277753	25280282	25280486	1	1	0.917667	0.938667	1	1	NA	1	1	1	1	1	1	0.941333	1	0.870667	0.884	0.933	NA	1	0.129333
Anapc5	chr5	-	122799338	122799474	122793436	122793558	122806244	122806435	NA	NA	NA	NA	NA	NA	NA	NA	NA	NA	NA	NA	NA	NA	0.885667	1	NA	NA	NA	NA	0.114333
Anapc5	chr5	-	122799338	122800593	122791826	122791934	122807299	122807401	NA	NA	NA	1	NA	0.784	NA	1	NA	NA	NA	1	1	0.829	NA	1	NA	1	NA	1	0.216
Anapc5	chr5	-	122802129	122802219	122799394	122799474	122806244	122806435	NA	NA	NA	NA	NA	NA	NA	NA	NA	NA	NA	NA	NA	NA	1	0.668	NA	NA	NA	NA	0.332
Anapc5	chr5	-	122802129	122802219	122799469	122799474	122806244	122806435	NA	NA	NA	NA	NA	NA	NA	NA	NA	NA	NA	NA	NA	0.830667	NA	0.668	NA	1	NA	NA	0.332
Anapc7	chr5	+	122432740	122432852	122428130	122428317	122435518	122435661	NA	NA	NA	1	NA	NA	NA	1	NA	NA	NA	NA	NA	NA	NA	NA	NA	NA	0.781667	NA	0.218333
Angel1	chr12	-	86720229	86720663	86717714	86717841	86721310	86721380	0.955333	0.952	0.956	0.952667	0.972	0.960333	0.974667	0.945333	0.899333	0.972333	0.949667	0.931	0.976	0.842333	0.879667	0.890333	0.955333	0.894	0.966	0.992333	0.15
Angel2	chr1	+	190932866	190933192	190928491	190928758	190937443	190937700	0.689667	0.747333	0.754333	0.764	0.786	0.718667	0.756667	0.696	0.738	0.705333	0.736	0.711	0.734	0.682667	0.729333	0.660667	0.736333	0.624333	0.732	0.659	0.161667
Angptl2	chr2	+	33228174	33228357	33216116	33216453	33242199	33242393	0.969333	0.939333	0.983333	0.935667	0.961	0.886667	0.961333	0.938667	0.971667	0.913333	0.952667	0.944667	0.980333	0.956	0.994333	0.984667	0.969	0.978333	0.993	0.962667	0.107667
Angptl2	chr2	+	33228174	33229032	33216072	33216453	33242199	33242393	0.966333	0.929667	0.980333	0.93	0.961333	0.849333	0.958667	0.924667	0.968	0.889333	0.945	0.935333	0.978667	0.952667	0.993	0.983	0.966	0.975	0.991	0.954	0.143667
Ank1	chr8	+	23110346	23110370	23109656	23109729	23111359	23111456	NA	0	NA	0.111333	NA	0.044	NA	0.120333	NA	0.0603333	NA	0.0156667	NA	0.130667	NA	0.0716667	NA	0.156667	0	NA	0.156667
Ank1	chr8	+	23131437	23131554	23123831	23123978	23132096	23132634	NA	0.012	NA	0.00566667	NA	NA	NA	0.0256667	NA	0	NA	0.00833333	NA	0.077	NA	0.129667	0	0.0326667	0	0	0.129667
Ank1	chr8	+	23141595	23141720	23141163	23141229	23148280	23148790	NA	0.344667	NA	0.544333	NA	NA	NA	0.437	NA	0.148333	NA	0.317667	NA	NA	NA	NA	NA	0.305333	0.0846667	NA	0.459667
Ank1	chr8	+	23141595	23141720	23141163	23141229	23148280	23149688	NA	NA	NA	NA	NA	NA	NA	NA	NA	0.148333	NA	NA	NA	NA	NA	0.28	NA	0.305333	0.0846667	0.543	0.458333
Ank1	chr8	+	23141595	23141720	23141163	23141304	23148280	23149688	NA	NA	NA	NA	NA	NA	NA	NA	NA	0.0716667	NA	NA	NA	0.046	NA	0.163333	NA	0.0426667	NA	0.444333	0.401667
Ank2	chr3	-	126963382	126963481	126962250	126962405	126964937	126965162	0.173	0.013	0	0	0	0	0.00633333	0.003	0	0	0.003	0	0	0.00666667	0.00966667	0.00233333	0	0	0.182333	0.274667	0.274667
Ank2	chr3	-	126979255	126979267	126976844	126976932	126981799	126981944	0.159	NA	0.0653333	0	0.019	NA	0	0	0.0236667	0	0	0.078	0.104333	0	NA	NA	0	0	0.071	NA	0.159
Ank2	chr3	-	127012672	127012771	127010853	127011051	127013238	127013337	0.961333	0.901333	0.996	0.899667	0.992333	0.961	0.992	0.893667	0.974333	0.921667	0.966	0.767667	0.989333	0.801667	0.948667	0.974	0.974	0.904667	0.939333	0.762333	0.233667
Ank2	chr3	-	127052225	127052249	127048181	127048280	127052687	127052873	0.257	NA	0.0196667	0.0646667	0	0.0626667	0.0286667	0.023	0.00566667	0.046	0.041	0.014	0.078	0.0326667	0.0336667	0.006	0.0186667	0.00333333	0.436333	0.385667	0.436333
Ank2	chr3	-	127248133	127248232	127104760	127104862	127339131	127339192	0.776667	0.865	0.825	0.807333	0.912	0.875333	0.93	0.829667	0.795333	0.800333	0.854667	0.791333	0.834667	0.788667	0.968333	0.755333	0.764	0.827667	0.865333	0.657667	0.310667
Ank2	chr3	-	127248133	127248232	127104760	127104862	127408844	127409031	1	0.866	1	0.973667	NA	NA	0.924333	0.939	0.887	0.978667	1	0.971333	1	0.728	0.912	0.984667	1	0.932	0.964333	0.912	0.272
Ank3	chr10	+	69904447	69904510	69904197	69904270	69920437	69920491	0.929333	NA	1	0.913	0.95	0.702333	0.890667	0.925333	0.917	0.880667	0.902667	0.975667	0.881	1	0.963333	1	0.944333	1	0.926	0.938667	0.297667
Ank3	chr10	+	69904447	69904510	69904197	69904270	69927694	69927818	0.274	0.230667	0.455667	0.275667	0.347	0.26	0.339333	0.229667	0.312333	0.195333	0.290667	0.215	0.307333	0.172	0.314667	0.178333	0.326667	0.222333	0.232	0.213667	0.283667
Ank3	chr10	+	69920437	69920491	69904197	69904270	69927694	69927818	0.0173333	0.0206667	0.0126667	0.0273333	0.027	0.107	0.0266667	0.0106667	0.0163333	0.0113333	0.014	0	0.0216667	0	0.0136667	0	0.0143333	0.00433333	0.0113333	0.013	0.107
Ank3	chr10	+	69929446	69929458	69927694	69927818	69932408	69932496	0.762333	NA	0.306	NA	0.118	NA	0.471667	0.666667	0.721	0.566667	0.429667	0.294333	0.656333	0.859333	0.595	0.77	0.485	0.866333	0.843667	0.928	0.81
Ank3	chr10	+	69953439	69953472	69950951	69951058	69955925	69956150	0.116	0.394667	0.0843333	0.105	0.071	0.185333	0.0546667	0.107	0.077	0.089	0.076	0.0686667	0.059	0.0743333	0.0813333	0.087	0.0866667	0.059	0.180667	0.125667	0.34
Ank3	chr10	+	69986088	69993762	69980271	69980394	69994371	69994446	1	NA	NA	NA	NA	NA	0.672	NA	NA	NA	NA	NA	NA	NA	NA	NA	NA	NA	1	NA	0.328
Ank3	chr10	+	69993544	69993762	69989934	69992475	69994371	69994446	1	NA	NA	NA	0.784333	NA	0.361	NA	1	NA	0.853667	NA	NA	1	0.755667	0.666667	1	NA	0.848	0.782333	0.639
Ank3	chr10	+	70001922	70002231	69999354	69999498	70002510	70002601	0.290667	0.206333	0.254	0.222333	0.255333	0.224333	0.224667	0.158	0.232667	0.177667	0.231667	0.216667	0.268667	0.276667	0.284667	0.264	0.290333	0.256	0.215667	0.292	0.134
Ank3	chr10	+	70006802	70006853	70004609	70004991	70008777	70008864	NA	NA	0.420667	NA	NA	NA	NA	NA	NA	NA	NA	NA	NA	NA	1	NA	0.666667	NA	NA	NA	0.579333
Ank3	chr10	+	70008777	70008864	70004609	70004991	70013971	70014055	NA	NA	0.323333	NA	NA	NA	NA	NA	NA	NA	NA	NA	NA	NA	NA	0.333333	0.847	NA	NA	0.048	0.799
Ank3	chr10	+	70008777	70008864	70006799	70006853	70015567	70015653	NA	NA	NA	NA	NA	NA	NA	NA	NA	NA	0	NA	NA	NA	0.076	NA	0.333333	NA	NA	NA	0.333333
Ankdd1b	chr13	-	96429785	96429884	96424732	96424828	96433301	96433400	NA	NA	NA	NA	NA	NA	NA	0.809	NA	1	NA	1	NA	NA	NA	NA	NA	0.786	NA	0.333333	0.666667
Ankef1	chr2	+	136533652	136533824	136532279	136532471	136537085	136537477	NA	NA	0.765333	1	1	NA	NA	NA	NA	NA	NA	NA	NA	NA	NA	NA	NA	NA	NA	NA	0.234667
Ankef1	chr2	+	136553621	136553782	136552315	136552542	136554685	136554823	NA	1	NA	0.804	NA	1	NA	NA	NA	1	NA	NA	NA	NA	NA	NA	NA	NA	NA	NA	0.196
Ankhd1	chr18	+	36624508	36625267	36614714	36614817	36632066	36632212	0.306667	0.251333	0.319	0.282667	0.271333	0.404667	0.302667	0.337	0.324333	0.303333	0.309	0.325	0.245	0.265333	0.262333	0.300333	0.230333	0.303333	0.281333	0.267333	0.174333
Ankib1	chr5	-	3755593	3755776	3733975	3734184	3802596	3802787	NA	NA	NA	0.539667	NA	NA	NA	0.706	0.666667	NA	NA	1	1	0.441333	NA	0.792667	NA	NA	0.737667	NA	0.558667
Ankmy1	chr1	-	92896068	92896212	92888446	92888916	92899498	92899688	0.860667	NA	1	NA	NA	NA	0.772333	1	1	1	NA	NA	1	NA	NA	NA	NA	NA	1	NA	0.227667
Ankmy2	chr12	+	36170448	36170587	36157123	36157423	36182347	36182508	0.666667	NA	NA	NA	NA	NA	NA	0.666667	NA	0.773667	NA	NA	NA	NA	NA	NA	NA	NA	1	NA	0.333333
Ankra2	chr13	+	98266150	98266532	98263193	98263476	98267315	98267474	0.806	0.826667	0.849667	0.803	0.806	0.801	0.801	0.874	0.770333	0.871333	0.808	0.806333	0.828333	0.782667	0.824333	0.718667	0.797667	0.760333	0.793667	0.833667	0.155333
Ankrd10	chr8	-	11620261	11620373	11619061	11619297	11628438	11628530	0.171667	0.196333	0.177667	0.151333	0.245667	0.146333	0.248333	0.242	0.206667	0.232	0.202	0.207333	0.304333	0.355667	0.241667	0.268667	0.251667	0.327	0.176333	0.264	0.209333
Ankrd10	chr8	-	11623696	11623858	11619061	11619297	11628438	11628530	NA	NA	0.179	NA	0.214667	NA	0.232	NA	NA	NA	0.202667	NA	0.303	NA	0.236667	0.313667	0.244	NA	NA	0.310333	0.134667
Ankrd10	chr8	-	11623696	11623858	11619258	11619297	11628438	11628530	0.152	0.198	0.179	0.137	0.214667	0.166333	0.232	0.248667	0.178	0.227	0.202667	0.222667	0.303	0.401	0.236667	0.313667	0.244	0.388667	0.176	0.310333	0.264
Ankrd11	chr8	-	122889638	122896156	122887527	122887626	122898573	122898716	NA	NA	NA	NA	NA	NA	NA	NA	NA	NA	0.807333	NA	0.956667	0.869667	0.807333	NA	0.913667	0.844667	0.899667	0.737667	0.219
Ankrd12	chr17	-	65982835	65987493	65979501	65979600	66024075	66024223	NA	NA	NA	1	1	NA	1	1	1	0.803	0.798333	0.887333	1	0.660667	NA	1	1	0.865333	1	0.740333	0.339333
Ankrd12	chr17	-	66042532	66042601	66037492	66037639	66049785	66049933	0.366333	0.36	0.273667	0.248667	0.495333	0.442667	0.256	0.325	0.137333	0.406	0.213667	0.341667	0.377	0.292667	0.175667	0.238	0.214667	0.343333	0.248667	0.348	0.358
Ankrd12	chr17	-	66050095	66050231	66049785	66049933	66050536	66050640	NA	NA	NA	NA	NA	NA	NA	NA	NA	NA	NA	NA	NA	NA	NA	0	NA	0.666667	NA	NA	0.666667
Ankrd12	chr17	-	66052953	66053091	66049785	66049933	66076883	66077022	1	NA	0.849	0.862667	1	0.893667	0.780667	0.908667	0.959	1	0.887333	0.860333	0.956333	0.911333	0.901333	0.898667	0.950333	1	0.786333	0.956333	0.219333
Ankrd13b	chr11	-	77472013	77472179	77470486	77471878	77472301	77472378	0.221667	0.380333	0.405	0.388667	0.227	0.379	0.283667	0.223	0.285333	0.239	0.311	0.179667	0.356333	0.154333	0.273333	0.205	0.344333	0.175	0.232	0.277	0.250667
Ankrd13c	chr3	+	157947475	157947956	157947413	157947431	157962277	157962382	NA	NA	NA	NA	0.817333	NA	1	NA	NA	NA	NA	NA	NA	NA	NA	NA	1	NA	NA	NA	0.182667
Ankrd13c	chr3	+	157962277	157962382	157947413	157947956	157972999	157975294	NA	NA	NA	NA	NA	NA	NA	1	NA	0.666667	NA	NA	NA	NA	NA	1	NA	NA	NA	NA	0.333333
Ankrd13c	chr3	+	157972999	157973045	157962277	157962382	157988639	157988784	NA	NA	NA	NA	NA	NA	0.390667	0.323667	NA	0.333333	0.0653333	0.140667	0.109333	NA	0	0.422667	0	NA	NA	NA	0.422667
Ankrd13c	chr3	+	157972999	157975294	157962277	157962382	157988639	157988784	0.691	0.704667	0.630333	0.896667	0.598667	0.613667	0.734	0.539333	0.888333	0.565333	0.558667	0.471667	0.376667	0.764	0.529333	0.640667	0.558	0.639333	0.868333	0.658667	0.52
Ankrd13c	chr3	+	157972999	157975294	157962277	157962382	157991680	157991812	0.711333	NA	1	NA	NA	NA	1	0.701333	1	0.723667	1	0.711333	0.698	1	NA	0.723667	1	NA	0.666667	1	0.333333
Ankrd13c	chr3	+	157972999	157975294	157972231	157972317	157988639	157988784	0.945333	1	1	1	0.869333	0.563	0.964333	0.94	0.898	0.864333	0.836333	1	1	0.687	1	0.841333	1	0.869333	1	1	0.437
Ankrd13c	chr3	+	157975227	157975294	157962277	157962382	157988639	157988784	0.956667	0.873	0.939667	0.989	0.945333	0.928667	0.968667	0.926	0.986333	0.895	0.934	0.905	0.873667	0.946333	0.920667	0.940667	0.938	0.929	0.983	0.943667	0.116
Ankrd13c	chr3	+	157975227	157975294	157962277	157962382	157991680	157991812	0.887	NA	1	NA	0.887	NA	1	0.816333	1	0.855333	1	0.873	0.887	1	NA	0.921667	1	NA	0.666667	1	0.333333
Ankrd13c	chr3	+	157975227	157975294	157972231	157972317	157988639	157988784	0.991	1	1	1	0.971333	0.776667	0.994667	0.99	0.984667	0.978	0.967667	1	1	0.954667	1	0.971	1	0.981333	1	1	0.223333
Ankrd13c	chr3	+	157991680	157991812	157975227	157975294	157999656	157999736	NA	NA	NA	NA	1	NA	1	NA	1	NA	0.831	NA	1	NA	0.895333	1	1	NA	NA	NA	0.169
Ankrd13d	chr19	-	4273535	4273602	4273020	4273102	4280536	4280726	0.916667	NA	0.937	0.907667	0.907	NA	0.921667	0.927	0.904333	0.934667	0.972	0.964	0.904333	0.798	0.923	0.912667	0.948667	0.928667	0.945333	0.919	0.174
Ankrd13d	chr19	-	4281162	4281208	4280936	4281080	4281917	4282042	0.919667	0.615333	0.896667	1	0.979667	0.928333	0.913333	0.957667	0.987333	0.953667	0.918333	0.956333	0.931333	0.895333	0.950667	0.875	0.935667	0.835333	0.951	0.933333	0.384667
Ankrd16	chr2	+	11785122	11785260	11784290	11784452	11786223	11786302	0.428	0.414	0.501	0.428667	0.472667	0.310667	0.432	0.412333	0.434667	0.292667	0.366333	0.376333	0.476667	0.487667	0.502	0.453333	0.48	0.453333	0.379333	0.504	0.211333
Ankrd16	chr2	+	11785169	11785260	11784292	11784452	11786223	11786302	0.213	0.245	0.292667	0.282	0.211333	0.130667	0.270333	0.262667	0.277667	0.169333	0.219333	0.239667	0.232	0.280667	0.280333	0.224	0.241667	0.292333	0.22	0.277	0.162
Ankrd17	chr5	-	90282850	90283603	90278242	90278388	90285040	90285143	0.316667	0.535667	0.284667	0.270333	0.292667	0.275	0.312	0.403667	0.333	0.324667	0.309	0.358333	0.385333	0.418	0.302	0.384667	0.307333	0.360333	0.344667	0.357	0.265333
Ankrd2	chr19	+	42043752	42043851	42042368	42042467	42044042	42044141	0.910333	NA	NA	NA	NA	NA	NA	NA	NA	NA	NA	NA	NA	NA	NA	NA	NA	NA	0.823667	0.960667	0.137
Ankrd24	chr10	+	81628739	81628925	81628578	81628640	81629548	81629747	0.507	NA	0.272	1	0.307667	NA	NA	0.833667	0.405	1	0.315333	0.586	NA	1	NA	0.577667	0.479667	1	0.606	0.763333	0.728
Ankrd24	chr10	+	81634666	81634753	81633708	81633755	81634864	81634995	1	NA	0.865333	1	0.935	1	0.879667	0.932	0.774333	0.961667	0.883333	0.914	0.749667	0.981	1	0.933667	1	0.905667	0.852333	0.935667	0.250333
Ankrd24	chr10	+	81634864	81634985	81633698	81633755	81635069	81635158	NA	NA	NA	NA	NA	NA	NA	0.666667	1	NA	NA	0.811	NA	NA	NA	NA	NA	0.834667	1	NA	0.333333
Ankrd24	chr10	+	81634864	81634995	81629548	81629748	81635069	81635158	0.801667	1	0.831333	0.915333	1	NA	0.847333	0.951333	0.895333	1	0.839667	0.915333	1	0.939667	0.96	0.872667	0.957333	1	0.879333	0.827	0.198333
Ankrd24	chr10	+	81634864	81634995	81629548	81629748	81636368	81636426	NA	NA	NA	NA	NA	NA	NA	NA	NA	0.398667	NA	NA	NA	0.201	NA	NA	NA	NA	0.475667	0.579333	0.378333
Ankrd24	chr10	+	81634864	81634995	81633702	81633755	81635069	81635158	1	1	0.924667	0.932	1	NA	0.924667	0.951333	1	0.947667	0.96	0.864667	0.96	1	0.864667	1	1	0.935333	1	0.945667	0.135333
Ankrd24	chr10	+	81634864	81634995	81633702	81633755	81635687	81635898	NA	NA	NA	NA	NA	NA	NA	NA	NA	NA	NA	NA	NA	0.0363333	NA	0.187667	NA	0.666667	NA	NA	0.630333
Ankrd24	chr10	+	81634864	81634995	81633702	81633755	81636368	81636426	NA	NA	NA	NA	NA	NA	NA	NA	0.816333	0.0466667	0.666667	NA	NA	NA	NA	NA	NA	NA	1	0.369667	0.953333
Ankrd24	chr10	+	81635069	81635158	81629548	81629748	81635687	81635752	1	NA	NA	1	NA	NA	1	1	1	NA	NA	1	0.869333	0.976	0.9	1	1	0.972333	0.919667	0.873667	0.130667
Ankrd24	chr10	+	81635069	81635158	81629548	81629748	81636368	81636421	0.246	NA	NA	NA	0.0423333	NA	NA	NA	NA	NA	NA	NA	NA	0.200333	NA	NA	NA	0.666667	0.246	0.404667	0.624333
Ankrd24	chr10	+	81635069	81635158	81633698	81633755	81635687	81635752	0.934333	NA	0.915	0.941333	0.864667	NA	0.946667	0.877667	0.781333	0.9	1	1	0.880333	0.770333	0.917333	0.794667	0.900333	0.966	1	0.834	0.229667
Ankrd24	chr10	+	81635069	81635158	81633698	81633755	81636368	81636421	NA	NA	0.387667	0.0543333	0.333333	NA	NA	0.333333	NA	0.335333	NA	NA	NA	NA	NA	NA	NA	0.408667	NA	0.435	0.380667
Ankrd24	chr10	+	81635687	81635752	81629548	81629748	81636368	81636426	0.685	NA	NA	0.888	NA	NA	0.799	0.899	0.740667	NA	NA	0.687	0.844667	0.643333	0.749333	0.967333	0.922333	0.946667	0.580333	0.735667	0.387
Ankrd24	chr10	+	81635687	81635752	81633708	81633755	81636368	81636426	1	NA	0.776	0.541667	0.762	NA	0.856	0.869	0.841	0.742	0.713667	0.748333	0.888	0.733	0.777	0.969333	0.73	0.796333	1	0.896	0.458333
Ankrd24	chr10	+	81639306	81639936	81638560	81638748	81640891	81640990	NA	NA	1	NA	NA	NA	1	NA	0.777333	1	1	0.777333	NA	NA	1	NA	NA	1	NA	NA	0.222667
Ankrd24	chr10	+	81640027	81640135	81639855	81639936	81640767	81640812	1	NA	0.832	0.976	0.977	NA	0.942667	1	0.914333	0.987333	1	0.969333	0.945333	0.964333	1	0.962333	0.948	0.973333	0.927333	0.979333	0.168
Ankrd24	chr10	+	81640027	81640812	81639855	81639936	81640891	81640990	0.906	1	1	0.867333	1	NA	1	NA	0.951667	1	0.931333	1	NA	1	1	1	1	0.964	1	NA	0.132667
Ankrd24	chr10	+	81640767	81640812	81639855	81639936	81640891	81640990	0.954	NA	1	0.882667	1	NA	1	NA	0.970333	1	0.945667	1	NA	1	1	1	1	0.956333	1	NA	0.117333
Ankrd24	chr10	+	81641975	81642048	81640891	81640990	81642300	81642419	0.687667	NA	0.802333	0.926	0.844333	0.551333	0.744	NA	0.743	0.74	0.784333	0.76	NA	0.769333	0.571667	0.761333	0.710667	0.695333	0.843333	NA	0.374667
Ankrd24	chr10	+	81641975	81642048	81640943	81640990	81642300	81642419	NA	NA	0.802333	NA	0.844333	0.551333	0.744	0.758333	NA	0.74	NA	0.76	0.804667	0.769333	0.571667	0.761333	0.710667	NA	0.843333	0.707333	0.293
Ankrd24	chr10	+	81644975	81645143	81643802	81643893	81646304	81646433	0.179	0.219667	0.183667	0.158667	0.112667	0.075	0.148667	0.229667	0.232333	0.204333	0.177667	0.185	0.151	0.336667	0.231667	0.334667	0.255	0.308333	0.185	0.191667	0.261667
Ankrd24	chr10	+	81646792	81646858	81646304	81646433	81647099	81647474	0.956667	0.786667	0.979333	0.878333	0.984667	0.869333	0.956	0.953667	0.981333	0.986667	0.992333	0.96	0.939333	0.938	0.959667	0.944	0.943	0.933667	0.977	0.95	0.205667
Ankrd26	chr6	-	118540450	118540549	118539846	118539875	118542889	118542983	0.840667	0.830333	0.928333	0.897333	0.836667	0.856	0.906667	0.908333	0.874	0.912667	0.873	0.851	0.775	0.897667	0.840333	0.897	0.750333	0.922	0.853667	0.805333	0.178
Ankrd27	chr7	+	35600314	35600425	35591751	35591882	35601489	35601646	0.906	0.871333	0.893	0.950667	0.87	0.888667	0.946667	0.929333	0.941667	0.904667	0.926667	0.930667	0.930667	0.932333	0.915333	0.894667	0.995333	0.898667	0.914667	0.958667	0.125333
Ankrd27	chr7	+	35600314	35600425	35591751	35591882	35602427	35602582	0.874667	0.858667	0.918	0.772333	0.781667	0.881333	0.964667	0.881333	0.914333	0.835667	0.950333	0.84	0.975333	0.815667	0.969	0.783667	0.868	0.788667	0.930667	0.957667	0.203
Ankrd27	chr7	+	35622304	35622349	35620542	35620662	35625646	35625766	0.75	0.755667	0.733	0.773667	0.768	0.758333	0.783	0.782333	0.754	0.724	0.703667	0.735333	0.769333	0.733333	0.773	0.781	0.736333	0.752	0.763	0.815667	0.112
Ankrd28	chr14	-	31743222	31743435	31736759	31736838	31755732	31755803	NA	1	NA	1	1	0.872667	NA	NA	NA	1	NA	1	NA	1	1	0.994667	NA	1	NA	NA	0.127333
Ankrd28	chr14	-	31746912	31747000	31743222	31743435	31755732	31755803	0.409	NA	NA	NA	NA	NA	NA	1	0.333333	NA	NA	NA	NA	NA	NA	NA	NA	NA	NA	NA	0.666667
Ankrd29	chr18	-	12282302	12282401	12268449	12268548	12305610	12305720	NA	NA	NA	NA	NA	0.956667	1	0.932	1	0.818667	0.923333	1	1	0.964333	1	1	0.953333	0.901333	NA	NA	0.181333
Ankrd29	chr18	-	12290716	12290815	12282302	12282401	12295878	12295989	NA	0.860667	0.527333	0.636333	1	NA	0.968333	0.590667	1	0.739333	0.971333	0.827333	0.811667	0.824667	0.672333	0.771	0.856667	0.748667	0.666667	0.905	0.472667
Ankrd29	chr18	-	12290716	12290815	12282302	12282401	12305610	12305711	0.542	NA	0.336333	0.139333	0.565	0.175667	0.319667	0.251667	0.297333	0.341667	0.347667	0.367	0.425667	0.351	0.506667	0.362333	0.306	0.36	0.543	0.646667	0.507333
Ankrd29	chr18	-	12295878	12295989	12268449	12268548	12305610	12305638	NA	NA	NA	NA	NA	NA	1	0.782	NA	0.736333	NA	NA	NA	0.942333	NA	NA	NA	NA	NA	NA	0.263667
Ankrd29	chr18	-	12295878	12295989	12282302	12282401	12305610	12305638	0.610333	NA	0.323	0.138667	0.395667	0	0.144333	0.254667	0.151333	0.227	0.338667	0.223667	0.245667	0.254	0.392	0.308	0.248333	0.261333	NA	NA	0.610333
Ankrd29	chr18	-	12295878	12295989	12290716	12290815	12305610	12305638	0.553	NA	1	0.838	0.936333	NA	0.929333	0.954667	0.752667	1	0.957667	0.719	0.631667	0.833333	0.826	1	0.854333	0.879667	NA	NA	0.447
Ankrd36	chr11	+	5578583	5578653	5575638	5575776	5583957	5584043	NA	0.929	NA	NA	NA	NA	0.666667	NA	1	NA	0.920667	0.747667	NA	0.333333	1	NA	NA	0.931333	NA	NA	0.666667
Ankrd42	chr7	-	92619547	92619683	92614351	92614552	92623967	92624087	0.709333	0.808333	0.761	0.706	0.769333	0.877667	0.810667	0.716667	0.883333	0.720333	0.799667	0.768333	0.706	0.662	0.784	0.657333	0.878	0.766	0.731	0.795333	0.226
Ankrd42	chr7	-	92619547	92619725	92614351	92614552	92623967	92624087	0.55	NA	0.679333	0.579667	0.637333	0.769667	0.671333	0.577333	0.811333	0.551333	0.639667	0.634333	0.532667	0.497333	0.670333	0.502333	0.767333	0.626667	0.588333	0.642	0.314
Ankrd45	chr1	+	161150964	161151317	161142690	161142718	161155245	161155413	0.961	1	1	1	1	0.855667	1	0.979667	1	1	0.944	0.900667	0.932333	0.862	1	0.962333	1	0.876667	0.963333	0.735667	0.264333
Ankrd45	chr1	+	161150964	161151317	161142711	161142840	161155245	161155413	0.607667	0.630333	0.724333	NA	NA	0.781	NA	NA	0.813333	0.578667	NA	0.861	0.892333	0.820667	0.870333	NA	NA	0.681667	0.823667	1	0.421333
Ankrd45	chr1	+	161150964	161151317	161142766	161142840	161155245	161155413	0.607667	0.630333	0.724333	0.855667	0.627667	0.781	0.834	0.789333	0.813333	0.578667	0.601	0.861	0.892333	0.820667	0.870333	0.799333	0.748	0.681667	0.823667	NA	0.313667
Ankrd45	chr1	+	161164171	161164214	161163266	161163405	161167711	161167839	0.627333	0.763667	0.556333	0.681667	0.559	0.711	0.473667	0.592333	0.431333	0.595333	0.350333	0.508333	0.430333	0.535667	0.491	0.468333	0.520667	0.481667	0.599667	0.816667	0.466333
Ankrd50	chr3	-	38454040	38457585	38449650	38452505	38462899	38463129	0.668	0.699	0.76	0.623667	0.664	0.552333	0.659	0.633	0.812667	0.592	0.842	0.728333	0.814667	0.589333	0.601667	0.696	0.656333	0.782333	0.567	0.520667	0.321333
Ankrd55	chr13	+	112317713	112317819	112288450	112288982	112318424	112318547	NA	NA	NA	NA	NA	NA	NA	NA	NA	NA	0	0.117	NA	0.213333	NA	NA	NA	0.116	NA	NA	0.213333
Ankrd6	chr4	-	32874206	32874370	32860321	32860588	32923300	32923455	1	NA	NA	NA	NA	NA	1	1	NA	NA	NA	NA	NA	NA	NA	NA	NA	NA	0.887	1	0.113
Ankrd61	chr5	-	143897004	143897253	143893535	143893633	143897360	143897685	NA	NA	NA	NA	1	NA	0.800333	1	1	NA	1	1	NA	NA	NA	NA	NA	0.800333	1	NA	0.199667
Ankrd65	chr4	+	155791597	155792132	155791171	155791508	155799473	155799503	1	NA	0.719667	NA	0.580667	NA	1	NA	0.828667	NA	NA	NA	NA	NA	NA	NA	NA	NA	0.719667	NA	0.419333
Ankrd9	chr12	-	110977663	110977770	110976428	110977548	110977947	110978127	0.491333	0.514	0.43	0.530333	0.547333	0.412	0.423	0.472	0.450667	0.483667	0.413	0.333667	0.507	0.469333	0.409	0.446667	0.53	0.459	0.441333	0.467667	0.213667
Anks1	chr17	+	27978426	27978489	27976560	27976717	27985065	27985362	0.359	0.128333	0.472667	0.220667	0.429	0.184667	0.454667	0.275	0.505	0.176	0.428	0.136667	0.451667	0.253667	0.421	0.354667	0.454667	0.266333	0.349333	0.406333	0.376667
Anks1	chr17	+	28058747	28058846	28058289	28058460	28059293	28062597	0.148	0.249	0.09	0.184333	0.104	0.225333	0.045	0.164667	0.0466667	0.160333	0.052	0.187667	0.0526667	0.128667	0.0476667	0.147667	0.0426667	0.133667	0.098	0.0933333	0.206333
Anks1b	chr10	+	90897246	90897426	90895098	90895206	90921295	90921424	0.885667	NA	NA	NA	NA	NA	1	1	NA	0.666667	NA	1	0.643333	1	NA	0.580333	0.649333	0.738333	0.859	0.841667	0.419667
Anks1b	chr10	+	90940563	90940575	90923530	90923602	90941425	90941512	NA	NA	NA	NA	NA	NA	NA	NA	NA	NA	NA	NA	NA	NA	NA	NA	0.437667	NA	NA	0.11	0.327667
Anks3	chr16	-	4948225	4948363	4947264	4947432	4953818	4953954	0.885	0.774	0.666667	1	1	NA	0.913333	0.913333	1	0.913333	1	1	1	1	0.959	1	NA	0.875	1	0.666667	0.333333
Anks3	chr16	-	4955857	4955939	4950612	4950768	4964119	4964237	NA	NA	NA	NA	NA	NA	NA	NA	NA	0.125667	NA	NA	NA	NA	NA	0.625333	NA	0	NA	NA	0.625333
Anks3	chr16	-	4957640	4957762	4953818	4953954	4964119	4964237	1	0.889667	NA	1	NA	NA	0.956	0.972667	NA	NA	1	0.911333	NA	NA	NA	NA	NA	NA	NA	NA	0.110333
Anks3	chr16	-	4957967	4958166	4955857	4955939	4964119	4964237	1	NA	NA	NA	NA	NA	0.789	0.759333	NA	0.789	0.886333	0.666667	NA	NA	0.812	0.295	NA	1	0.768333	NA	0.705
Anks3	chr16	-	4957967	4958166	4957640	4957762	4960396	4960568	0.922667	0.994	0.951333	0.959	0.946333	0.937667	0.898667	0.969667	0.938667	0.933333	0.948333	0.928	0.933	0.945667	0.958	0.963667	0.880667	0.939333	0.953333	0.907333	0.113333
Anks3	chr16	-	4957967	4958166	4957640	4957762	4964119	4964237	0.636667	0.706667	0.678	0.676333	0.749	0.779667	0.646667	0.697	0.67	0.722667	0.672	0.653667	0.719667	0.594667	0.565	0.580333	0.605667	0.578667	0.666667	0.678667	0.214667
Anks3	chr16	-	4960396	4960568	4957640	4957762	4964119	4964237	0.598667	0.332667	0.621333	0.523333	0.688333	0.627667	0.582	0.586667	0.544	0.599667	0.592667	0.561333	0.638	0.511333	0.467	0.51	0.535667	0.541667	0.594667	0.677	0.355667
Anks6	chr4	-	47044819	47045024	47043535	47043642	47049068	47049571	0.943667	1	1	NA	1	NA	0.898	1	0.965667	1	1	1	1	0.977333	1	0.928	1	0.971667	1	0.977333	0.102
Anks6	chr4	-	47044819	47045024	47043535	47043642	47056948	47057306	NA	NA	1	0.973	NA	1	0.898	NA	0.976	1	1	0.928	0.947	1	1	0.971333	1	0.958	NA	0.947667	0.102
Anks6	chr4	-	47046009	47046054	47044819	47045024	47049068	47049571	0.954	0.945	1	0.975667	1	0.924	0.942	0.876333	1	0.926	0.835667	0.920667	0.965333	0.925667	0.919667	0.907667	0.926667	0.929	0.959667	0.952333	0.164333
Anks6	chr4	-	47046009	47046054	47044819	47045024	47056948	47057306	NA	1	1	0.938333	1	0.938333	1	1	0.938333	1	0.896	1	1	0.931333	1	1	1	0.9	NA	1	0.104
Anks6	chr4	-	47049068	47049571	47043535	47043642	47056948	47057306	0.722	1	1	NA	NA	NA	0.888667	1	0.880667	1	1	0.814	0.761667	1	1	0.927333	1	0.888667	0.888667	0.818333	0.278
Anks6	chr4	-	47049068	47049571	47044819	47045024	47056948	47057306	NA	1	1	0.833	NA	0.814333	1	1	0.927333	1	0.871333	1	1	0.871333	1	1	1	0.864667	NA	1	0.185667
Anks6	chr4	-	47049068	47049571	47046009	47046054	47056948	47057306	0.967333	0.854	0.961	0.882333	1	0.979333	0.953667	0.985667	0.895333	0.913	0.967333	0.97	0.939	1	0.968333	0.952667	0.890667	0.976	1	0.952333	0.146
Ankzf1	chr1	+	75194177	75194284	75192159	75192677	75194840	75194943	0.930667	NA	0.933667	0.965333	0.936333	0.865333	0.886	0.896	0.817333	0.923	NA	NA	0.935	0.892	NA	NA	NA	NA	0.894667	0.895	0.148
Ankzf1	chr1	+	75194177	75194284	75192159	75192677	75194840	75195712	0.930667	0.937667	0.933667	0.965333	0.936333	0.865333	0.886	0.896	0.817333	0.923	0.904667	0.842667	0.935	0.892	0.890333	0.894667	0.899667	0.873333	0.894667	NA	0.148
Ankzf1	chr1	+	75194840	75195712	75194177	75194284	75197643	75198124	NA	0.694667	NA	1	1	1	1	1	0.955667	1	0.955	0.949	1	0.941667	1	0.931667	1	1	NA	NA	0.305333
Ankzf1	chr1	+	75195062	75195712	75194177	75194284	75197643	75198376	NA	NA	NA	NA	NA	NA	NA	NA	NA	NA	NA	NA	NA	0.762333	1	0.762333	NA	1	NA	NA	0.237667
Ankzf1	chr1	+	75195568	75195712	75195062	75195256	75196152	75196381	NA	NA	NA	1	NA	NA	NA	1	1	0.860667	NA	1	NA	NA	NA	1	NA	NA	NA	NA	0.139333
Ankzf1	chr1	+	75196152	75196381	75195568	75195712	75197643	75198124	NA	NA	NA	0.753667	NA	NA	NA	NA	NA	0.861667	NA	NA	NA	NA	NA	NA	NA	NA	NA	NA	0.108
Ano1	chr7	-	144619474	144619486	144618848	144618920	144621667	144621750	0.993	1	1	0.375667	0.991	NA	0.987	0.644333	1	0.746333	1	NA	1	0.499333	0.992	0.816667	1	0.577333	0.987	0.99	0.624333
Ano1	chr7	-	144648574	144648640	144648023	144648079	144650502	144650554	0.279	NA	0.528	0.465333	0.690333	NA	0.667	0	0.563333	NA	0.495	NA	0.709333	0.426	0.635	NA	0.648667	NA	0.356333	0.633	0.709333
Ano2	chr6	+	126015513	126015695	126013679	126013732	126036847	126036953	NA	NA	NA	NA	NA	NA	NA	1	NA	NA	NA	1	1	0.834667	NA	1	NA	0.85	NA	1	0.165333
Ano2	chr6	+	126036847	126036953	126015513	126015695	126039241	126040126	NA	NA	NA	NA	NA	NA	NA	NA	NA	1	1	0.943333	NA	1	NA	0.737667	NA	1	NA	NA	0.262333
Ano3	chr2	-	110671118	110671216	110667719	110667853	110681814	110681872	1	NA	0.939333	NA	0.883667	1	NA	NA	1	NA	1	NA	NA	NA	NA	NA	NA	NA	NA	NA	0.116333
Ano3	chr2	-	110794912	110795071	110783664	110783765	110862819	110862938	NA	NA	NA	NA	NA	NA	NA	1	NA	NA	NA	NA	NA	0.822667	NA	1	NA	NA	NA	NA	0.177333
Ano4	chr10	-	89084546	89084591	89068099	89068231	89088192	89088293	NA	NA	1	NA	NA	NA	0.73	NA	0.666667	0.423	1	NA	0.808	0.865	0.582	NA	0.679667	0.562667	NA	0.865	0.577
Ano4	chr10	-	89084546	89084653	89067179	89068231	89088192	89088293	NA	NA	1	NA	NA	NA	0.45	NA	0.666667	0.333333	NA	NA	NA	NA	0.506333	NA	0.276667	NA	1	0.839667	0.723333
Ano4	chr10	-	89125119	89125224	89116865	89117002	89149249	89149444	NA	NA	1	NA	NA	NA	NA	NA	NA	0.895	NA	0.666667	NA	0.666667	0.873333	NA	0.937667	0.784	NA	1	0.333333
Ano6	chr15	+	95962075	95962281	95949858	95949956	95967622	95967728	0.666667	NA	NA	NA	NA	NA	NA	NA	NA	NA	NA	NA	NA	1	NA	NA	1	0.516	NA	NA	0.484
Ano8	chr8	-	71482132	71482188	71480435	71481242	71482979	71483141	NA	NA	NA	NA	NA	NA	0.666667	NA	1	NA	NA	NA	NA	NA	NA	NA	NA	NA	NA	NA	0.333333
Ano8	chr8	-	71483239	71483367	71482506	71482659	71484267	71484364	NA	NA	NA	NA	1	NA	1	NA	1	NA	0.865667	0.832333	NA	NA	NA	NA	1	0.896667	NA	NA	0.167667
Ano9	chr7	-	141107050	141107087	141106762	141106874	141107166	141107319	0.861667	NA	0.719	NA	0.845333	NA	0.834	NA	0.883333	NA	0.787333	NA	0.922	NA	0.847333	NA	0.868333	NA	0.893	0.855333	0.203
Ano9	chr7	-	141108617	141108691	141108250	141108385	141110375	141110512	0.867	NA	NA	NA	1	NA	NA	NA	NA	NA	NA	NA	NA	NA	NA	NA	NA	NA	1	NA	0.133
Ano9	chr7	-	141108940	141108987	141108784	141108843	141110375	141110512	0.884	NA	0.854	NA	0.671333	NA	0.772	NA	0.722	NA	0.683333	NA	0.766667	NA	0.769	NA	0.713667	0.895333	0.789667	0.745	0.224
Anp32a	chr9	+	62373484	62373677	62341328	62341554	62377299	62377307	0.734667	1	0.628333	NA	1	NA	0.887667	1	0.847	0.701	0.760667	0.773667	0.960667	0.909333	NA	NA	NA	NA	0.602333	0.932333	0.397667
Anp32a	chr9	+	62373484	62373677	62341328	62341554	62377299	62377363	NA	NA	NA	NA	NA	NA	0.887667	1	0.847	NA	NA	NA	0.960667	0.909333	1	0.652	0.964667	NA	NA	0.932333	0.348
Anp32b	chr4	+	46468558	46468787	46460089	46460239	46471397	46471467	0.753667	NA	NA	NA	NA	NA	1	NA	NA	NA	NA	NA	NA	NA	NA	NA	NA	NA	NA	NA	0.246333
Anp32b	chr4	+	46468558	46468787	46460089	46460239	46472086	46472657	NA	1	1	0.838	NA	1	1	NA	0.666667	1	1	NA	NA	NA	NA	NA	NA	NA	NA	NA	0.333333
Anp32e	chr3	+	95937023	95937195	95933908	95934058	95944306	95944361	1	NA	NA	NA	NA	NA	0.915667	NA	NA	NA	NA	0.819	NA	NA	NA	NA	NA	1	NA	NA	0.181
Anp32e	chr3	+	95937119	95937195	95929324	95929650	95944306	95944361	1	0.772667	NA	1	1	NA	NA	NA	NA	NA	NA	NA	0.851333	1	0.883667	NA	1	NA	NA	0.869667	0.227333
Anpep	chr7	-	79843026	79843108	79842613	79842660	79848144	79848193	0.0696667	0.056	0.217333	0.065	0.143667	0.339667	0.033	0.279667	0.410667	0.0393333	0	0.333333	0.098	0.125667	0.0973333	0.0873333	0.174667	0.00933333	NA	0	0.410667
Anxa11	chr14	+	25884141	25884264	25883926	25883985	25886010	25886804	NA	NA	NA	NA	NA	NA	NA	NA	NA	NA	NA	NA	NA	NA	NA	NA	NA	NA	1	0.867333	0.132667
Anxa2	chr9	+	69467290	69467390	69453619	69453739	69479677	69479791	NA	NA	NA	NA	NA	NA	NA	NA	NA	NA	NA	NA	NA	NA	NA	NA	0.666667	1	NA	NA	0.333333
Anxa6	chr11	-	54987050	54987068	54986121	54986215	54991390	54991444	0.532667	0.435	0.508333	0.495	0.460667	0.610333	0.522	0.559	0.520667	0.579333	0.472333	0.575	0.471	0.484333	0.431	0.484	0.445667	0.473	0.523333	0.386333	0.224
Anxa9	chr3	-	95297236	95297359	95296095	95296852	95300152	95300211	0.752667	1	1	NA	1	NA	0.995667	1	1	NA	0.992333	1	1	1	NA	1	1	0.961	1	NA	0.247333
Anxa9	chr3	-	95302665	95302779	95302334	95302425	95302985	95303080	0.779	NA	0.873	0.877333	0.757333	NA	0.876	0.758333	0.854667	0.789667	0.834	0.692	0.845333	0.919333	0.908	0.907667	0.864333	0.738	0.779667	0.835	0.227333
Aoah	chr13	+	20995419	20995494	20994630	20994667	20999897	21000070	NA	NA	NA	NA	NA	NA	NA	0.666667	NA	0.79	NA	1	NA	1	1	0.954	1	1	NA	NA	0.333333
Aoah	chr13	+	21002896	21002956	21002654	21002713	21005030	21005127	NA	NA	NA	NA	NA	NA	NA	NA	NA	NA	0.858333	1	NA	NA	NA	1	0.778667	NA	NA	NA	0.221333
Aoc2	chr11	+	101328343	101328629	101325062	101326683	101329196	101329702	1	NA	0.950667	NA	NA	NA	1	NA	0.930667	1	0.969	1	1	NA	0.877667	1	1	NA	NA	NA	0.122333
Aox1	chr1	+	58077442	58077576	58076063	58076188	58078425	58078513	NA	NA	0.775333	NA	1	NA	NA	NA	1	NA	NA	NA	NA	NA	NA	NA	NA	NA	NA	NA	0.224667
Aox1	chr1	+	58082011	58082203	58081502	58081589	58085433	58085661	NA	NA	1	NA	NA	NA	1	NA	0.666667	NA	NA	NA	NA	NA	NA	NA	NA	NA	NA	NA	0.333333
Aox3	chr1	+	58114870	58114928	58113185	58113312	58118597	58118694	NA	NA	1	NA	0.886333	NA	1	NA	NA	1	1	1	1	0.922667	1	1	NA	0.845333	NA	NA	0.154667
Aox3	chr1	+	58158904	58159019	58158200	58158370	58159636	58159759	NA	NA	1	NA	0.617333	NA	NA	0.907667	0.672667	0.855333	NA	0.928333	NA	0.853333	1	0.778	NA	1	NA	0.558667	0.441333
Aox3	chr1	+	58176473	58176569	58172120	58172348	58177518	58177647	NA	NA	1	NA	0.666667	NA	NA	NA	NA	NA	NA	NA	NA	NA	NA	NA	NA	NA	NA	NA	0.333333
Aox3	chr1	+	58180605	58180658	58179316	58179391	58183465	58183580	NA	NA	1	NA	NA	NA	1	NA	0.861333	1	NA	NA	NA	NA	NA	NA	NA	NA	NA	NA	0.138667
Aox3	chr1	+	58186276	58186342	58183465	58183580	58188334	58188523	NA	NA	NA	NA	NA	NA	0.865333	1	NA	1	NA	NA	1	1	1	0.969333	NA	1	NA	NA	0.134667
Aox4	chr1	+	58259041	58259170	58257214	58257310	58262564	58262639	NA	NA	NA	NA	NA	NA	1	NA	0.865333	NA	1	NA	NA	NA	1	NA	NA	NA	NA	NA	0.134667
Ap1ar	chr3	-	127815595	127815694	127813239	127813295	127816909	127817006	0.773	0.766	0.82	0.779	0.844667	0.778667	0.842667	0.794	0.836333	0.760667	0.796333	0.771667	0.881	0.774	0.858667	0.791667	0.881333	0.771333	0.751667	0.777667	0.129667
Ap1g2	chr14	-	55104581	55104658	55104362	55104458	55104830	55104927	0.973333	0.969333	0.928667	1	0.923667	1	0.938	0.945	0.91	0.928667	0.881333	0.914	0.903667	0.857667	0.873667	0.766667	0.864333	0.851	0.926667	0.862333	0.233333
Ap1m1	chr8	+	72250680	72250828	72240017	72240243	72255696	72255822	NA	NA	NA	0.666667	NA	NA	NA	NA	NA	NA	NA	NA	NA	NA	NA	1	NA	0.385	NA	NA	0.615
Ap1m1	chr8	+	72253208	72253280	72250680	72250828	72255696	72255822	NA	NA	1	0.576333	NA	NA	0.829333	0.701667	NA	0.554667	0.519667	1	NA	NA	NA	0.853	NA	0.796	0.747	1	0.480333
Ap1m1	chr8	+	72253208	72253280	72251742	72251869	72255696	72255822	NA	NA	0.796	0.271	NA	NA	0.853	0.871	NA	0.853	NA	1	NA	0.758667	NA	0.690333	NA	0.905667	0.796	0.885333	0.729
Ap1m1	chr8	+	72255696	72255822	72240017	72240243	72256734	72257385	NA	NA	NA	NA	NA	NA	NA	0.955333	NA	1	NA	0.916333	NA	1	NA	0.897	NA	0.933	1	NA	0.103
Ap1m1	chr8	+	72255696	72255822	72251742	72251869	72256734	72257385	NA	NA	NA	NA	NA	NA	NA	NA	NA	NA	NA	1	NA	1	NA	1	NA	0.888667	NA	NA	0.111333
Ap1s3	chr1	-	79623681	79623790	79614202	79614340	79625104	79625285	0.892333	1	1	0.925333	0.894667	NA	0.921667	0.909333	0.945	0.685333	0.967	1	1	1	0.976667	0.857333	0.817	1	0.947333	0.793	0.314667
Ap1s3	chr1	-	79623681	79623790	79614202	79614340	79625106	79625285	0.791667	0.687	0.812333	0.613	0.856667	NA	0.884667	0.717	0.768	0.742667	0.864333	0.673	0.744667	0.54	0.862333	0.696333	0.863667	0.499667	0.773	0.647	0.385
Ap2a1	chr7	-	44909698	44909828	44907723	44907832	44929279	44929496	0.887333	NA	NA	NA	NA	NA	NA	NA	NA	NA	NA	NA	NA	NA	NA	NA	NA	NA	1	NA	0.112667
Ap2b1	chr11	+	83364794	83364836	83350978	83351171	83365646	83365793	0.227	0.206667	0.251667	0.249667	0.196	0.184667	0.271333	0.327	0.266333	0.31	0.276667	0.299	0.221667	0.26	0.216667	0.234333	0.212333	0.22	0.311333	0.259667	0.142333
Ap2m1	chr16	+	20540807	20540813	20540332	20540415	20540974	20541110	0.744	0.193667	0.495333	0.326667	0.447333	0.319	0.314	0.353333	0.403667	0.333333	0.342667	0.372333	0.142333	0.276667	0.143333	0.176667	0.0783333	0.192	0.452	0.401333	0.665667
Ap2m1	chr16	+	20541746	20541866	20540974	20541110	20542638	20542750	NA	NA	NA	NA	NA	NA	NA	NA	NA	NA	NA	NA	NA	1	NA	0.666667	NA	NA	NA	NA	0.333333
Ap3b1	chr13	+	94394718	94394793	94358959	94359231	94417960	94418143	NA	NA	NA	NA	NA	NA	NA	NA	NA	NA	NA	0.795	NA	NA	NA	NA	NA	1	NA	NA	0.205
Ap3b1	chr13	+	94528164	94528396	94483212	94483360	94542778	94542876	NA	NA	NA	NA	NA	NA	NA	1	NA	1	1	0.861	NA	NA	NA	NA	NA	1	NA	NA	0.139
Ap3b1	chr13	+	94528164	94528396	94483212	94483360	94565604	94566316	NA	NA	NA	NA	NA	NA	NA	NA	NA	1	NA	NA	0.837333	0.931333	NA	0.804	NA	1	NA	1	0.196
Ap3b1	chr13	+	94528164	94528396	94493668	94493741	94542778	94542876	1	NA	1	NA	0.949667	NA	NA	1	NA	1	1	0.799667	1	0.965667	1	1	0.949667	1	1	0.886	0.200333
Ap3b1	chr13	+	94542778	94542876	94501917	94502024	94565604	94566316	1	NA	NA	NA	0.666667	NA	NA	NA	NA	NA	1	NA	NA	NA	0.666667	1	1	0.819	NA	NA	0.333333
Ap3b1	chr13	+	94542778	94542876	94528164	94528396	94565604	94566316	NA	NA	NA	NA	NA	NA	NA	NA	NA	1	NA	NA	1	NA	0.912333	0.887333	1	1	1	0.875667	0.124333
Ap3b2	chr7	-	81465139	81465257	81464630	81464811	81465656	81465765	1	NA	NA	NA	NA	NA	1	1	NA	NA	NA	1	NA	1	NA	NA	NA	0.666667	0.993333	1	0.333333
Ap3b2	chr7	-	81473856	81473919	81473386	81473519	81476279	81476351	0.950333	1	1	NA	0.982667	NA	NA	NA	NA	NA	1	NA	1	0.888667	NA	NA	NA	NA	1	0.993333	0.111333
Ap3m1	chr14	-	21044652	21044824	21040051	21040137	21045487	21045763	1	NA	1	0.978	NA	1	1	1	0.985	0.923667	1	0.966	1	1	0.859667	1	1	0.964667	NA	NA	0.140333
Ap3m1	chr14	-	21044652	21044824	21040051	21040137	21052139	21052450	NA	NA	NA	NA	NA	NA	0	0.0986667	NA	NA	NA	0.391333	NA	NA	NA	NA	NA	NA	0.333333	NA	0.391333
Ap3m1	chr14	-	21044814	21044824	21040952	21041090	21045487	21045763	0.0173333	NA	0	0.097	0	0.333333	0	0.0263333	0.012	0	0.007	0.0246667	0	0.0153333	0	0	0	0	0.048	0.00733333	0.333333
Ap3m1	chr14	-	21045487	21045763	21040051	21040137	21052139	21052222	0.925667	0.983	0.884333	0.881	NA	0.943	NA	0.862333	0.915	0.822667	0.951333	0.902333	0.959333	0.901333	0.936667	0.924333	0.919	0.889333	NA	NA	0.160333
Ap3m1	chr14	-	21045487	21045763	21040986	21041090	21051895	21052077	0.963333	NA	0.843	1	1	NA	0.976333	1	1	NA	1	NA	1	NA	0.960667	1	1	NA	0.928	1	0.157
Ap3m1	chr14	-	21045487	21045763	21040986	21041090	21052139	21052222	0.783	0.579333	0.74	0.754333	0.704667	0.719	NA	0.567667	0.667667	0.542	0.665333	0.524	0.623667	0.645	0.679667	0.596	0.741333	0.560667	0.74	0.749667	0.259
Ap3m1	chr14	-	21045487	21045763	21040986	21041090	21052139	21052450	0.783	NA	NA	NA	NA	NA	0.770333	0.567667	0.667667	NA	0.665333	NA	0.623667	NA	NA	NA	NA	NA	0.74	0.749667	0.215333
Ap3m1	chr14	-	21045487	21045763	21040986	21041090	21052454	21052508	0.959333	NA	0.911	0.846	0.902	0.859333	0.897	0.908	0.853	0.899667	0.88	0.860333	0.936333	0.797	0.902333	0.825	0.862667	0.793	0.818	0.966667	0.173667
Ap4e1	chr2	+	127019285	127019359	127014169	127014293	127028171	127028293	0.895667	0.924333	0.892667	0.925333	0.928333	0.845667	0.918333	0.988667	0.984667	0.951333	0.994333	0.892333	0.857	0.815333	0.937667	0.912333	0.899667	0.872	0.986	0.886	0.179
Ap4e1	chr2	+	127019285	127019359	127014169	127014293	127033529	127033689	NA	NA	1	0.895667	NA	NA	1	0.954333	NA	1	NA	1	0.941667	1	1	1	1	0.919333	NA	0.986	0.104333
Ap4e1	chr2	+	127043420	127043543	127035043	127035210	127046147	127046287	NA	NA	0.778333	1	0.666667	NA	1	0.867333	0.949	1	1	1	NA	1	1	NA	0.852667	1	1	NA	0.333333
Ap4e1	chr2	+	127043420	127043543	127037785	127037859	127046147	127046287	1	1	0.987333	0.981333	0.917	1	0.992333	0.969333	1	1	0.946667	0.954333	0.96	0.925	0.971667	0.852	1	0.889667	1	0.931667	0.148
Ap4e1	chr2	+	127043646	127043756	127037785	127037859	127046147	127046287	1	1	0.979	0.974333	0.899333	1	0.992333	0.964	1	1	0.951667	0.953667	0.966333	0.928	0.977667	0.809333	1	0.868333	1	0.934	0.190667
Ap4e1	chr2	+	127043678	127043756	127043420	127043543	127046147	127046287	0.971	0.929	0.863333	0.817333	0.912	0.975667	0.944333	0.86	0.778333	0.883333	0.899667	0.821	0.903333	0.848333	0.918	0.956	0.860667	0.892667	0.838	0.804667	0.197333
Ap4m1	chr5	+	138172348	138172479	138172183	138172248	138172786	138172893	0.917	0.83	0.907	0.87	0.859	0.826667	0.926333	0.912667	0.929667	0.889333	0.950667	0.934333	0.890667	0.894333	0.902333	0.914333	0.896	0.891667	0.949667	0.920667	0.124
Ap4m1	chr5	+	138172786	138172893	138172348	138172479	138174749	138174860	NA	NA	NA	NA	NA	NA	NA	NA	NA	NA	NA	NA	NA	1	NA	NA	NA	NA	NA	0.783333	0.216667
Ap5m1	chr14	+	49078694	49078922	49073548	49074194	49080235	49080375	0.921	0.982333	0.877	0.884	0.895	0.840333	0.870667	0.957	0.896667	0.897333	0.880333	0.894333	0.910667	0.956	0.861333	0.956	0.968333	0.909	0.881	0.922667	0.142
Ap5s1	chr2	+	131211262	131211473	131210439	131210681	131212446	131212736	0.424667	0.731	0.504	0.550333	0.526667	0.851667	0.391667	0.337	0.427333	0.352667	0.379333	0.329333	0.441333	0.41	0.576	0.422	0.648	0.475333	0.408667	0.432667	0.522333
Ap5s1	chr2	+	131211262	131211473	131210439	131210681	131212450	131212864	0.953333	1	1	1	0.954667	1	1	0.838667	0.859667	0.859	0.978	0.873667	1	0.836667	0.972667	0.927	0.977333	0.894667	0.888	0.96	0.163333
Apaf1	chr10	-	91079886	91080131	91079446	91079636	91082182	91082770	0.981	0.865333	0.969	0.988	1	1	1	1	1	0.993	1	1	0.982333	1	1	1	0.978667	1	1	1	0.134667
Apba1	chr19	+	23932683	23932716	23917552	23917698	23933699	23933786	0.82	NA	NA	NA	NA	NA	0	0.0386667	NA	0	NA	0.333333	0.666667	0.441333	NA	0.181333	NA	0.223667	0.905333	0.887	0.905333
Apba2	chr7	+	64695023	64696017	64635030	64635084	64714430	64714511	0.93	1	1	0.862	0.977	1	1	0.952	NA	1	1	1	1	1	1	0.864	1	0.946333	0.989333	0.987	0.138
Apba2	chr7	+	64734654	64734690	64733512	64733658	64736880	64736967	0.249333	0.307667	0.168	0.147	0.103333	0.21	0.119667	0.267333	0.215667	0.334	0.131333	0.360333	0.196667	0.351	0	0.394	0.172333	0.395333	0.350667	0.635	0.635
Apbb1	chr7	-	105568618	105568658	105567577	105567753	105568792	105568876	0.259333	NA	0.376667	NA	0.143667	NA	0.112	NA	0.0733333	NA	0.101	NA	0.353333	NA	0.143667	NA	0.206333	NA	0.137	0.0533333	0.323333
Apbb1	chr7	-	105568618	105568658	105567577	105567753	105569239	105569273	1	NA	NA	NA	NA	NA	NA	NA	1	NA	0.810333	NA	1	NA	0.917333	NA	1	NA	0.784333	0.589	0.411
Apbb1	chr7	-	105568792	105568876	105567577	105567753	105569239	105569271	1	NA	NA	NA	1	NA	0.916333	NA	1	NA	0.978333	NA	1	NA	0.956	NA	1	NA	0.928667	0.878333	0.121667
Apbb1ip	chr2	+	22849536	22849623	22835917	22836039	22853066	22853210	NA	NA	NA	NA	NA	1	NA	1	NA	1	1	0.891333	NA	NA	NA	NA	NA	1	NA	NA	0.108667
Apbb2	chr5	-	66391626	66391687	66364973	66365120	66400075	66400284	0.956667	NA	1	0.849	NA	NA	NA	NA	0.965667	NA	NA	NA	0.952667	0.949	NA	NA	NA	NA	NA	1	0.151
Apbb2	chr5	-	66392272	66392335	66391771	66391857	66400075	66400281	0.167	0.294333	0.363333	0.247667	0.223	0.407667	0.581333	0.551333	0.608333	0.611	0.392333	0.451	0.59	0.831	0.654667	0.796667	0.689667	0.802667	0.168667	0.476667	0.664
Apbb2	chr5	-	66492057	66492172	66462097	66462166	66543461	66543617	0.841	0.958	0.892667	0.909333	0.828	0.956	0.865333	0.946	0.891	0.987333	0.861667	0.93	0.972333	0.95	0.866667	0.955667	0.929	0.950333	0.923667	0.946	0.159333
Apbb2	chr5	-	66543398	66543617	66492057	66492172	66618567	66618784	0.935667	NA	0.71	1	1	1	0.906	0.853333	1	0.945333	1	0.848667	1	0.922	0.733667	0.897333	0.964333	0.774333	0.816333	0.881667	0.29
Apbb2	chr5	-	66543461	66543617	66492057	66492172	66618567	66618670	0.967667	1	0.885	1	1	1	0.961667	0.950333	1	0.982333	1	0.941333	1	0.976667	0.905333	0.967	0.98	0.922333	0.894667	0.971333	0.115
Apc	chr18	+	34266057	34266222	34221251	34221276	34268297	34268379	NA	NA	NA	NA	NA	NA	1	1	NA	NA	NA	NA	NA	NA	NA	NA	1	NA	0.464333	NA	0.535667
Apc	chr18	+	34289837	34289942	34279268	34279352	34296030	34296129	0.814333	0.828333	0.796667	0.796	0.844333	0.604333	0.846333	0.798333	0.811667	0.790667	0.817333	0.857333	0.866	0.779667	0.876	0.736667	0.841	0.898	0.855333	0.896333	0.293667
Aph1a	chr3	+	95894820	95894991	95893968	95894283	95895142	95895216	0.742	0.666667	0.751333	0.869333	0.924	0.964667	NA	0.783667	0.924	0.948667	0.691667	0.934	0.911	0.905667	0.583667	0.827667	0.756	0.812333	0.902333	0.918667	0.381
Aph1a	chr3	+	95894820	95894991	95894054	95894283	95895142	95895216	0.742	NA	NA	NA	NA	NA	0.669	0.783667	0.924	NA	0.691667	NA	0.911	NA	NA	NA	NA	NA	0.902333	NA	0.255
Aph1a	chr3	+	95894820	95894991	95894054	95894283	95896236	95896360	0.819333	NA	NA	NA	NA	NA	0.724667	1	NA	NA	0.666667	NA	1	NA	NA	NA	NA	NA	1	NA	0.333333
Aph1a	chr3	+	95895142	95895216	95894054	95894283	95896236	95898288	NA	NA	0.666667	NA	NA	NA	0.828333	1	NA	NA	NA	0.462	NA	NA	NA	0.852333	0.919333	NA	NA	NA	0.538
Aph1a	chr3	+	95895447	95895570	95895142	95895216	95895717	95895845	NA	1	1	0.834	NA	NA	NA	NA	NA	1	NA	1	NA	1	NA	1	1	0.944667	NA	NA	0.166
Aph1a	chr3	+	95895447	95895570	95895142	95895216	95896236	95896360	0.939667	1	1	1	0.961	NA	0.939667	0.838667	1	0.867333	1	0.917333	1	0.917333	1	0.697667	0.669	0.834	1	1	0.331
Aph1a	chr3	+	95895717	95895845	95895142	95895570	95896236	95897832	0.934667	0.697667	0.914	0.947333	0.917333	0.958	0.876	0.939333	0.921	0.918333	0.902	0.917667	0.886667	0.928667	0.971667	0.924667	0.926	0.941333	0.914	0.907667	0.274
Aph1b	chr9	-	66788198	66788451	66784517	66784645	66790597	66790668	NA	NA	NA	NA	NA	NA	0.416333	0.166	NA	NA	NA	0.527	0.549	0.856333	NA	NA	NA	0.416333	NA	NA	0.690333
Aph1c	chr9	-	66828672	66828746	66827736	66827859	66833158	66833329	1	NA	1	NA	0.97	1	0.910333	1	1	1	0.95	1	0.963667	1	1	0.863	1	1	1	1	0.137
Api5	chr2	-	94426932	94427577	94425590	94425797	94437923	94438136	1	NA	NA	1	NA	NA	1	1	1	0.89	NA	1	NA	0.895667	NA	1	NA	1	0.949	1	0.11
Api5	chr2	-	94427511	94427577	94426932	94427084	94437923	94438136	NA	NA	NA	NA	NA	NA	NA	NA	NA	NA	NA	1	NA	NA	NA	1	0.777	0.922	NA	NA	0.223
Aplf	chr6	-	87668415	87668487	87646013	87646351	87671989	87672064	NA	NA	NA	NA	NA	NA	NA	NA	NA	NA	NA	NA	1	0.747	NA	NA	NA	NA	NA	NA	0.253
Aplp2	chr9	-	31167560	31167728	31164542	31164673	31168707	31168916	0.508333	0.408	0.584667	0.396	0.541	0.428333	0.579333	0.340333	0.615667	0.335333	0.585	0.327667	0.607333	0.266	0.681	0.276	0.663333	0.288333	0.477667	0.510667	0.415
Apmap	chr2	-	150599727	150599817	150594363	150594417	150600243	150600360	0.029	0.132	0.0396667	0.048	0.0296667	0.0663333	0.02	0.0873333	0.0293333	0.0736667	0.0306667	0.0606667	0.02	0.107333	0.0483333	0.088	0.038	0.083	0.025	0.0496667	0.112
Apoa2	chr1	+	171225267	171225366	171225090	171225121	171225665	171225798	1	NA	1	NA	0.855333	NA	NA	NA	NA	NA	1	NA	NA	NA	NA	NA	NA	NA	NA	NA	0.144667
Apoa2	chr1	+	171225283	171225366	171225081	171225121	171225665	171225798	1	NA	1	NA	0.861333	NA	NA	NA	NA	NA	NA	NA	NA	NA	NA	NA	NA	NA	NA	NA	0.138667
Apoa2	chr1	+	171225286	171225366	171225053	171225121	171225665	171225798	1	NA	1	NA	0.873	NA	NA	NA	NA	NA	NA	NA	NA	NA	NA	NA	NA	NA	NA	NA	0.127
Apoa2	chr1	+	171225298	171225366	171225083	171225121	171225665	171225798	1	NA	1	NA	0.821	NA	NA	NA	NA	NA	NA	NA	NA	NA	NA	NA	NA	NA	NA	NA	0.179
Apoa2	chr1	+	171225665	171225798	171225298	171225366	171226142	171226373	NA	NA	NA	1	NA	NA	NA	1	1	0.864	NA	1	NA	NA	NA	1	NA	NA	NA	NA	0.136
Apobec1	chr6	-	122588144	122588172	122581352	122581750	122591086	122591260	NA	NA	0.617	0.816667	0.712	NA	0.637333	1	0.641	0.891	0.944	0.862667	0.850333	0.72	0.483333	0.96	0.333333	1	0.723333	0.722333	0.666667
Apobec1	chr6	-	122591086	122591204	122588052	122588172	122596631	122596777	1	0.948	0.958333	1	NA	1	1	1	1	1	1	0.891	1	0.888	1	0.968333	NA	1	0.948	0.965667	0.112
Apobec1	chr6	-	122591086	122591260	122588144	122588172	122596631	122596777	1	NA	0.892	1	1	NA	1	1	1	1	1	0.837	1	0.660667	1	0.923333	NA	1	0.905	0.926667	0.339333
Apobec1	chr6	-	122596631	122596777	122591086	122591204	122600057	122600127	1	NA	NA	NA	0.983333	1	0.953667	1	1	1	0.945	1	1	1	0.896667	0.974333	1	1	0.976	0.950333	0.103333
Apobec2	chr17	-	48422940	48423505	48419230	48419633	48432478	48432728	NA	NA	NA	NA	NA	NA	0.806667	1	NA	1	1	NA	NA	1	1	0.833	NA	1	NA	NA	0.193333
Apobec3	chr15	+	79911101	79911192	79906850	79906963	79914959	79915906	NA	NA	NA	NA	NA	NA	NA	NA	NA	NA	NA	NA	NA	NA	NA	NA	NA	NA	1	0.806667	0.193333
Apobr	chr7	+	126585375	126587811	126584941	126585068	126587896	126588162	1	NA	1	NA	0.822667	1	NA	NA	NA	NA	1	NA	NA	NA	NA	NA	NA	NA	NA	NA	0.177333
Apoc1	chr7	-	19691887	19692035	19689480	19689636	19692410	19692638	0.978667	1	0.980333	0.925667	0.989	1	0.945	0.955	0.967667	1	0.949667	1	0.942333	1	0.938667	1	0.942	0.835667	0.978667	0.965333	0.164333
Apod	chr16	-	31314398	31314468	31311013	31311164	31314551	31314808	NA	0.853	NA	NA	NA	NA	NA	0.757	NA	0.803333	NA	0.808	1	0.751333	NA	0.840667	0.627	0.743667	0.845667	0.841667	0.373
Apol7d	chr1	+	71653156	71653386	71652836	71653019	71657044	71657457	1	NA	NA	1	1	0.879333	0.816333	0.557667	1	1	0.825333	0.868	0.799333	0.684667	0.850667	0.783	0.879333	0.503333	0.715667	1	0.496667
Apol7d	chr1	+	71654317	71654498	71653338	71653386	71657044	71657245	0.193333	NA	0.012	0.516667	0.556667	0	0.261333	0.0466667	0.133	0.103333	0.109333	0.031	0.0876667	0.113333	0.0493333	0.031	0.161667	0.206	0.161	0.0873333	0.556667
Apol7d	chr1	+	71657044	71657166	71653334	71653386	71660751	71660945	0.844	NA	0.94	1	0.556333	1	0.778	1	0.898	0.879667	0.926667	0.893	0.903667	0.917333	0.898667	0.949333	1	1	0.926667	0.882667	0.443667
Apoo	chrX	+	94379925	94380033	94367116	94367162	94382110	94382230	0.872333	1	1	0.947667	0.961	0.921	0.93	0.876333	0.976	0.92	0.902333	1	1	0.678667	1	0.968667	0.965333	0.933667	1	NA	0.321333
Apoo	chrX	+	94382110	94382230	94379925	94380033	94394188	94394280	NA	NA	NA	NA	NA	NA	NA	1	NA	NA	NA	NA	NA	0.704333	NA	NA	NA	1	NA	NA	0.295667
Apoo	chrX	+	94387664	94387719	94382110	94382230	94390744	94390840	1	NA	0.951667	0.860333	NA	NA	1	NA	1	0.752667	0.949	1	1	NA	1	1	0.961333	1	NA	NA	0.247333
Apoo	chrX	+	94387664	94387719	94382110	94382230	94394188	94394280	1	NA	1	1	1	0.586	0.860333	0.925333	0.892	1	1	1	1	1	0.961333	1	0.972333	0.780667	1	NA	0.414
Apoo	chrX	+	94390744	94390840	94382110	94382230	94394188	94394280	NA	NA	NA	1	1	NA	0.862	NA	0.932667	1	1	1	1	NA	0.897667	NA	0.913	0.766	NA	NA	0.234
Apoo	chrX	+	94390744	94390840	94387664	94387719	94394188	94394280	0.269667	NA	0.152333	0.318667	0.442	0.363333	0.539667	0.446	0.560333	0.336667	0.546	0.631	0.466667	0.415	0.307667	0.404333	0.554	0.286	0.347667	0.655667	0.503333
Apoo	chrX	+	94390744	94390840	94387664	94387719	94398121	94398202	1	NA	NA	NA	1	NA	1	1	1	1	NA	0.717333	NA	NA	NA	NA	1	NA	0.819667	1	0.282667
Apoo	chrX	+	94390744	94390840	94387664	94387719	94412459	94412525	NA	NA	NA	NA	NA	NA	NA	NA	0.843667	1	1	NA	0.787	NA	NA	NA	1	NA	NA	NA	0.213
Apopt1	chr12	+	111751186	111751275	111730021	111730112	111754963	111754980	1	0.951333	0.941333	1	0.975333	NA	0.955	0.963667	0.843667	0.959333	0.971	0.978333	0.915	0.915667	0.885	0.941	1	0.962667	0.987667	0.984667	0.156333
App	chr16	-	84978063	84978285	84954439	84955432	85056323	85056526	0.702333	NA	NA	NA	NA	NA	1	NA	NA	NA	1	1	1	1	NA	1	0.755	0.839667	1	NA	0.297667
Appbp2os	chr11	+	85237139	85237247	85235170	85235332	85237410	85237514	0.445	NA	0.46	0.449667	0.563333	NA	0.333333	0.0506667	0.0423333	0	0.587333	0.666667	0.744	0.333333	0.478333	NA	0.381333	NA	0.159333	0.358667	0.744
Appl1	chr14	-	26960950	26961038	26959424	26959466	26962805	26962877	0.961333	0.990333	0.977333	0.953333	0.968667	0.869667	0.970333	0.964333	0.971667	0.973333	0.973333	0.973	0.972667	0.981	0.960333	0.98	0.972	0.986333	0.963667	0.958333	0.120667
Aprt	chr8	-	122575880	122576006	122575401	122575535	122576118	122576231	0.119333	0.323333	0.15	0.0336667	0.130667	0.0283333	0.127667	0.0553333	0.038	0.097	0.140333	0.119333	0.158667	0.180667	0.077	0.102667	0.0813333	0.121333	0.0523333	0.0683333	0.295
Aprt	chr8	-	122576118	122576231	122575170	122575215	122576514	122576621	0.723	NA	0.907333	NA	0.606333	0.449333	0.640667	NA	0.675	NA	0.720333	0.668	0.579333	NA	0.762	NA	0.63	0.247	NA	NA	0.660333
Aprt	chr8	-	122576118	122576252	122575136	122575215	122576514	122576671	0.333333	NA	0.634	NA	0.413667	0.163667	0.337333	NA	0.267	NA	0.412333	0.0823333	0.164667	NA	0.357333	NA	0.279333	0.0986667	NA	NA	0.551667
Araf	chrX	+	20849111	20849156	20848588	20848619	20849926	20850082	0.0216667	0.0383333	0.0223333	0.111	0.0113333	0.105667	0.00566667	0.00633333	0.00666667	0.0106667	0.0316667	0.019	0.00633333	0.0213333	0	0.0106667	0.0166667	0	0.0273333	0.011	0.111
Araf	chrX	+	20853559	20853587	20853317	20853459	20857611	20857788	1	NA	0.976333	0.947333	1	NA	0.98	0.895	0.901667	0.987	0.938333	0.991	0.943667	0.890333	0.960667	0.915333	1	NA	0.944667	0.965667	0.109667
Araf	chrX	+	20853912	20854115	20853559	20853587	20857410	20857522	1	NA	NA	NA	1	NA	1	1	1	NA	0.909	1	1	NA	0.844333	1	1	NA	0.758667	NA	0.241333
Araf	chrX	+	20857410	20857522	20853559	20853587	20857611	20857788	1	NA	NA	NA	0.908333	NA	0.898667	0.942	0.932667	NA	0.914667	1	0.951	NA	1	NA	1	NA	0.901333	1	0.101333
Araf	chrX	+	20857410	20857522	20853676	20853816	20857611	20857788	0.721	0.736333	0.508667	0.871	0.799	0.916333	0.852333	0.622	0.962667	NA	NA	0.689	NA	0.777333	NA	0.666333	0.684	0.809667	0.828333	0.776	0.454
Araf	chrX	+	20857410	20857522	20853912	20854115	20857611	20857788	0.0466667	0.129333	0.0516667	0.056	0.0853333	0.086	0.074	0.063	0.0613333	0.0326667	0.0553333	0.0756667	0.152333	0.127333	0.125333	0.110667	0.123667	0.079	0.0373333	0.0683333	0.119667
Araf	chrX	+	20858765	20858873	20858393	20858512	20859978	20860208	0.839333	NA	0.628667	0.872333	0.955333	0.470333	0.839333	0.958333	0.857667	1	1	0.867	0.552333	0.726667	1	0.824	0.906	0.639667	0.961	0.884	0.529667
Arap1	chr7	+	101367020	101367098	101348066	101348199	101372955	101373501	1	NA	0.965333	0.894333	1	1	1	0.917	1	1	NA	1	1	1	0.918333	0.977	1	0.953333	1	NA	0.105667
Arap1	chr7	+	101384861	101385040	101378368	101378532	101385551	101385593	0.917667	1	0.915333	0.835667	0.890333	0.964667	0.883	0.933	0.853	0.954	0.908667	NA	0.869	0.963	0.868	0.973333	0.889	0.913667	0.895	0.910333	0.164333
Arap1	chr7	+	101384861	101385040	101378368	101378532	101385551	101385616	NA	NA	NA	NA	NA	0.964667	0.883	0.933	NA	0.954	0.908667	0.979	0.869	NA	0.868	NA	NA	0.913667	NA	NA	0.111
Arap1	chr7	+	101384861	101385040	101378368	101378532	101386148	101386198	0.958	NA	0.898667	0.891	0.924333	0.909333	0.891333	1	0.825	0.859333	0.912	1	0.895333	0.922333	0.857333	0.817	0.868	1	0.927	0.877333	0.183
Arap1	chr7	+	101385551	101385616	101378189	101378532	101386148	101386273	0.939333	1	0.892	0.967333	0.895333	0.922333	0.898333	1	0.865	0.908333	0.931667	1	0.907	0.956	0.86	0.901667	0.848333	1	0.914667	0.890667	0.151667
Arap1	chr7	+	101385551	101385616	101378189	101378532	101386391	101386541	NA	NA	NA	NA	NA	NA	NA	NA	NA	NA	0.888	NA	1	NA	1	NA	NA	NA	NA	NA	0.112
Arap2	chr5	-	62606074	62606209	62602444	62604656	62611703	62611767	1	1	0.897333	1	1	1	0.954333	0.866333	0.982667	1	0.955	0.848667	0.978333	1	0.961667	1	0.961	0.886	0.952	0.939667	0.151333
Arap2	chr5	-	62635951	62636069	62630132	62630261	62638961	62639036	NA	NA	1	0.78	NA	NA	1	0.918333	NA	1	NA	1	1	0.891	NA	1	NA	1	1	0.991	0.22
Arap2	chr5	-	62641327	62641396	62638961	62639036	62642794	62642942	0.926	1	0.883333	NA	0.862667	NA	0.834667	0.955333	0.86	1	0.782667	0.793	0.869	0.921	0.801	0.553	0.842333	1	0.701667	0.858333	0.447
Arap2	chr5	-	62714732	62714802	62706607	62706728	62730520	62730874	1	NA	1	NA	0.986667	NA	0.985333	1	0.988333	0.886	0.969667	NA	0.984333	1	0.967667	NA	1	NA	1	0.971333	0.114
Arap3	chr18	-	37974101	37974140	37972623	37973651	37974364	37974502	0.835	0.902	0.738333	0.929333	0.839	0.934667	0.878667	0.920333	0.942333	0.929333	0.921	0.94	0.881333	0.896333	0.819	0.910667	0.828	0.863667	0.885333	0.81	0.204
Arel1	chr12	-	84952190	84952416	84951081	84951381	84965888	84966030	0.677333	NA	0.545333	NA	0.666667	0.759333	0.485	0.499667	0.291333	NA	0.702	0.507	0.774	NA	0.593333	0.754333	0.522333	NA	0.306	NA	0.482667
Arfgap1	chr2	+	180967533	180967814	180967244	180967329	180971050	180971114	0.881	0.744667	0.806	0.751667	0.811667	0.902667	0.803333	0.781	0.800667	0.729333	0.778	0.781667	0.833667	0.873333	0.876	0.837333	0.828333	0.773333	0.764333	0.859667	0.173333
Arfgap1	chr2	+	180967601	180967814	180967264	180967329	180971050	180971114	0.902667	0.743	0.835	0.777667	0.840667	0.908333	0.843	0.823667	0.845667	0.787	0.826667	0.818333	0.872333	0.892667	0.894667	0.865333	0.866667	0.816	0.822667	0.896	0.165333
Arfgap2	chr2	+	91268451	91268508	91267335	91267416	91273540	91273669	NA	NA	NA	NA	NA	NA	0.942667	NA	0.666667	1	NA	NA	NA	1	NA	NA	1	NA	1	0.935	0.333333
Arfgap2	chr2	+	91269069	91269111	91268451	91268508	91269451	91269504	0.0416667	0.0256667	0.0423333	0.0236667	0.0363333	0	0.114	0.0256667	0.098	0.014	0.075	0.0123333	0.165333	0.0266667	0.178667	0.0583333	0.139	0.0556667	0.017	0.0986667	0.178667
Arfgap2	chr2	+	91269451	91269504	91268451	91268508	91273540	91273669	NA	NA	NA	NA	NA	NA	NA	NA	NA	NA	NA	NA	0.958333	0.852667	NA	NA	NA	NA	0.909667	0.874	0.105667
Arfgef1	chr1	-	10157899	10158060	10154280	10154410	10159876	10160028	NA	NA	NA	NA	NA	NA	0.895333	1	1	NA	NA	NA	NA	NA	NA	NA	NA	NA	NA	NA	0.104667
Arfgef2	chr2	+	166826926	166826957	166805587	166805835	166827541	166827665	1	0.666667	1	1	NA	1	0.990667	0.943	0.987333	1	1	0.949667	1	0.920667	0.973667	1	0.980333	1	0.974333	1	0.333333
Arfgef2	chr2	+	166827541	166827665	166805587	166805835	166834470	166834617	0.966667	1	0.875667	0.950667	NA	0.865	0.923333	0.873667	0.919	0.938	0.897333	0.839	0.925667	0.966667	0.979333	0.782333	0.965	0.845	0.916667	0.926	0.217667
Arfgef2	chr2	+	166842684	166842753	166836201	166836457	166845449	166845601	0.908	0.880333	0.801333	0.897333	0.860667	0.848333	0.899	0.890667	0.865333	0.889	0.836667	0.921667	0.827333	0.768667	0.84	0.925667	0.896	0.857333	0.844	0.72	0.205667
Arfgef3	chr10	-	18591129	18592342	18588010	18589772	18594907	18595029	0.88	NA	0.809333	NA	0.765333	NA	1	NA	1	NA	1	NA	NA	NA	NA	NA	NA	NA	1	NA	0.234667
Arfip1	chr3	-	84515632	84515790	84497203	84497891	84527685	84527798	0.369333	NA	0.803667	0.768667	1	NA	0.768667	0.785333	0.774667	0.646	0.666667	0.353	0.947	0.926333	0.908667	0.662667	0.841667	0.576667	0.938333	0.879667	0.647
Arfip1	chr3	-	84515632	84515790	84497203	84497891	84534586	84534695	NA	NA	NA	NA	NA	NA	NA	0.666667	NA	NA	0.393667	NA	NA	0.666667	NA	NA	NA	NA	NA	0.435333	0.273
Arfip1	chr3	-	84515632	84515790	84497735	84497891	84527685	84527798	NA	NA	NA	0.768667	NA	NA	NA	NA	NA	NA	NA	NA	0.947	NA	NA	NA	0.841667	0.576667	NA	NA	0.370333
Arfip1	chr3	-	84519481	84519703	84497735	84497891	84527685	84527798	0.978667	0.892	0.987667	0.994667	1	1	0.996	0.981667	0.989	0.986667	0.993	0.979667	0.996333	0.995667	0.996333	0.983	0.991667	0.971333	0.997	0.998667	0.108
Arfip1	chr3	-	84519481	84519703	84497735	84497891	84534586	84534695	0.263667	1	0.755	1	1	0.408	0.535	0.894667	1	NA	0.538667	0.806333	1	0.755	0.839667	0.755	NA	NA	0.881	0.643333	0.736333
Arfip1	chr3	-	84519481	84519703	84497735	84497891	84547933	84548035	0.333333	NA	NA	1	1	NA	0.421667	NA	NA	NA	NA	NA	NA	1	0.352333	0.173	NA	NA	0.384333	NA	0.827
Arfip1	chr3	-	84519481	84519703	84509807	84509982	84534586	84534695	0.717667	1	0.594667	0.945	1	NA	1	0.905333	0.755	0.810667	1	0.852667	0.863333	0.758	0.806333	0.806333	0.666667	0.881	0.914	0.659	0.405333
Arfip1	chr3	-	84519481	84519703	84509807	84509982	84547933	84548035	NA	NA	NA	0.824667	NA	NA	0.333333	1	1	0.839667	NA	NA	NA	0.881	1	1	0.384333	1	0.852667	NA	0.666667
Arfip1	chr3	-	84519481	84519703	84515632	84515790	84527685	84527798	0.987333	0.874333	0.972667	0.98	0.986333	0.983	0.983333	0.972333	0.971333	0.985333	0.981	0.984667	0.97	0.969333	0.984667	0.967667	0.967333	0.980333	0.985	0.984667	0.113
Arfip1	chr3	-	84527685	84527798	84497735	84497891	84547933	84548035	0.618667	NA	1	NA	1	0.666667	0.448	NA	NA	NA	NA	0.708	0.372	1	0.448	0.616	NA	0.919667	NA	1	0.628
Arfip1	chr3	-	84527685	84527798	84509807	84509982	84547933	84548035	NA	NA	1	NA	1	NA	0.708	NA	NA	NA	NA	1	NA	0.892667	1	1	0.402667	1	NA	0.781333	0.597333
Arfip1	chr3	-	84527685	84527798	84515632	84515790	84547933	84548035	NA	NA	1	NA	0.870667	1	NA	NA	NA	NA	NA	NA	NA	NA	NA	NA	NA	NA	NA	NA	0.129333
Arfip1	chr3	-	84534586	84534695	84509807	84509982	84582413	84582534	NA	NA	NA	NA	NA	NA	1	NA	NA	NA	NA	NA	0.893667	1	1	NA	1	NA	NA	1	0.106333
Arfip2	chr7	-	105637651	105637725	105637119	105637278	105637862	105637915	0.944667	NA	1	0.801333	0.900333	1	0.920333	0.983667	0.958	0.948667	0.784333	0.952	0.916	0.965667	0.848	0.975667	0.927	0.941	0.975333	0.907	0.215667
Arfip2	chr7	-	105637862	105638040	105637120	105637278	105638208	105638327	0.886667	0.905333	0.895333	0.837333	0.900667	0.983667	0.916333	0.91	0.943333	0.947667	0.909667	0.925	0.871667	0.876667	0.929	0.914667	0.934	0.885333	0.935333	0.94	0.146333
Arfip2	chr7	-	105637939	105638040	105637120	105637278	105638208	105638327	0.904	0.923	0.911	0.858	0.914333	0.986333	0.929333	0.924	0.952	0.955667	0.923	0.936667	0.892333	0.896	0.941	0.929667	0.946	0.903667	0.946	0.949667	0.128333
Arfrp1	chr2	-	181364013	181364096	181359638	181359739	181364604	181364711	1	NA	0.881	1	1	NA	1	1	NA	NA	NA	1	NA	0.861333	NA	1	NA	1	NA	1	0.138667
Arfrp1	chr2	-	181364013	181364096	181359638	181359739	181365218	181365320	1	NA	NA	NA	NA	NA	1	NA	NA	NA	0.666667	NA	NA	NA	NA	NA	NA	NA	0.791667	1	0.333333
Arfrp1	chr2	-	181364013	181364195	181359714	181359739	181364310	181364398	NA	NA	NA	NA	NA	NA	NA	NA	NA	NA	NA	1	NA	1	NA	1	1	0.723	NA	NA	0.277
Arfrp1	chr2	-	181364013	181364195	181359714	181359739	181364604	181364698	1	NA	0.873333	NA	NA	NA	NA	NA	NA	NA	NA	NA	NA	0.801333	NA	NA	NA	NA	NA	NA	0.198667
Arfrp1	chr2	-	181364310	181364398	181361390	181361472	181365218	181365404	NA	NA	NA	NA	NA	NA	NA	1	0.822667	0.879333	1	1	NA	NA	NA	NA	NA	NA	NA	NA	0.177333
Arfrp1	chr2	-	181364604	181364698	181359714	181359739	181365218	181365338	NA	NA	NA	NA	NA	NA	1	NA	1	NA	0.820333	1	NA	NA	NA	NA	1	NA	NA	NA	0.179667
Arfrp1	chr2	-	181364604	181364698	181361390	181361472	181365218	181365338	NA	NA	1	1	NA	NA	1	NA	0.888667	0.844333	1	NA	NA	NA	1	NA	NA	NA	NA	NA	0.155667
Arfrp1	chr2	-	181364604	181364698	181364013	181364195	181365218	181365338	NA	NA	NA	NA	NA	NA	NA	NA	NA	NA	NA	NA	NA	0.898333	NA	NA	NA	1	NA	NA	0.101667
Arhgap1	chr2	+	91651763	91651823	91649859	91650252	91654045	91654207	0.981333	0.944	0.86	1	1	1	0.967667	0.974667	1	0.944	0.978	0.982	0.977	0.944333	0.871	1	0.894333	0.932667	1	0.944	0.14
Arhgap1	chr2	+	91651763	91651823	91649859	91650252	91654072	91654207	0.777333	0.881667	0.796333	0.793333	0.821667	0.768333	0.866	0.844333	0.885	0.864333	0.903667	0.824	0.879	0.827	0.909	0.779333	0.873667	0.836333	0.885	0.908667	0.140667
Arhgap1	chr2	+	91651763	91651823	91649859	91650252	91662297	91662385	NA	NA	NA	0.538333	0.642	NA	NA	0.426667	NA	0.546667	0.475	0.658333	NA	NA	NA	NA	NA	0.334333	NA	NA	0.324
Arhgap10	chr8	-	77351613	77351672	77310730	77310881	77382724	77382790	NA	NA	NA	NA	NA	NA	NA	NA	NA	NA	NA	NA	NA	NA	NA	1	NA	0.751333	NA	NA	0.248667
Arhgap10	chr8	-	77384750	77384796	77365085	77365160	77409547	77409642	NA	NA	NA	NA	NA	NA	NA	NA	0.563333	NA	0.666667	NA	NA	NA	NA	0.442667	0.474	NA	0.281333	0.666667	0.385333
Arhgap10	chr8	-	77450827	77450923	77432739	77432811	77517629	77517783	0.992	0.897333	0.98	0.962667	0.979333	0.934333	0.900333	0.918667	0.942333	0.958	0.937667	0.959333	0.908333	0.939667	0.973667	0.954	0.975	0.941667	0.975	0.882667	0.109333
Arhgap12	chr18	-	6056978	6056993	6052861	6052923	6057516	6057591	0.209333	0.042	0.245	0.286667	0.212333	0.198333	0.132667	0.178667	0.147	0.286333	0.145333	0.161333	0.133	0.126	0.213667	0.297333	0.216333	0.166333	0.220667	0.165333	0.255333
Arhgap12	chr18	-	6057516	6057591	6052861	6052923	6061846	6061972	0.192	0.202333	0.227	0.21	0.256667	0.216333	0.359333	0.175333	0.312333	0.256	0.290667	0.222	0.340333	0.279667	0.267	0.237667	0.328667	0.261667	0.234	0.277667	0.184
Arhgap12	chr18	-	6057516	6057591	6056978	6056993	6061846	6061972	1	0.763667	0.884667	0.835	0.938667	0.845667	0.968	0.979333	0.938	1	0.920333	0.886	0.909667	1	0.964	0.912333	0.975333	0.932333	0.908	0.875667	0.236333
Arhgap12	chr18	-	6064340	6064421	6039353	6039455	6111684	6112439	0.585333	NA	0.875	1	1	NA	1	NA	NA	0.849333	0.825333	NA	0.902667	NA	NA	NA	NA	NA	NA	1	0.414667
Arhgap12	chr18	-	6064340	6064421	6052861	6052923	6111684	6112439	0.729	NA	0.943	0.893333	0.881667	NA	1	1	0.936333	0.453	0.771	0.792667	1	0.459333	0.796	0.792667	0.731	NA	0.716	0.498	0.547
Arhgap12	chr18	-	6065704	6065845	6064340	6064421	6069830	6070091	0.477667	0.454333	0.451667	0.402333	0.526333	0.526	0.414333	0.4	0.454	0.385333	0.405667	0.366	0.523333	0.508333	0.514	0.492	0.5	0.495333	0.388667	0.482	0.160333
Arhgap12	chr18	-	6065704	6065845	6064340	6064421	6111684	6112439	0.889	0.928	0.791	NA	0.907	0.882333	0.856667	0.843	0.886667	0.911667	0.910333	0.920333	0.895667	0.894667	0.870667	0.907667	0.907	0.89	0.826	0.932333	0.141333
Arhgap12	chr18	-	6073210	6073286	6069830	6070091	6135803	6135941	0.100333	0.393667	0.175	0.305667	0.174	0.668	0.0933333	0.103667	0.217	0.180667	0.106	0.219667	0.150667	0.164	0.120333	0.045	0.0896667	0.503	0.0313333	0.062	0.636667
Arhgap12	chr18	-	6111684	6112439	6064340	6064421	6135803	6135960	NA	NA	1	NA	NA	NA	1	NA	0.629667	1	1	NA	0.766333	1	0.833	0.805	0.740333	NA	NA	1	0.370333
Arhgap12	chr18	-	6111684	6112439	6069830	6070091	6115813	6115850	0.979	0.886333	0.961333	0.940333	0.927	0.976333	0.895667	0.991333	0.947	0.947	0.951667	1	0.902667	0.913333	0.930333	0.87	0.894667	0.953667	0.953333	0.972	0.13
[truncated: 21,253 more rows]

## Sheet: MXE
geneSymbol	chr	strand	1stExonStart_0base	1stExonEnd	2ndExonStart_0base	2ndExonEnd	upstreamES	upstreamEE	downstreamES	downstreamEE	E10.5_FNP_Ect	E10.5_FNP_Mes	E10.5_MdP_Ect	E10.5_MdP_Mes	E10.5_MxP_Ect	E10.5_MxP_Mes	E11.5_FNP_Ect	E11.5_FNP_Mes	E11.5_MdP_Ect	E11.5_MdP_Mes	E11.5_MxP_Ect	E11.5_MxP_Mes	E12.5_FNP_Ect	E12.5_FNP_Mes	E12.5_MdP_Ect	E12.5_MdP_Mes	E12.5_MxP_Ect	E12.5_MxP_Mes	Nasal_epi_E11.5	Nasal_epi_E12.5	MaxdeltaPSI
0610007P14Rik	chr12	-	85819478	85819569	85822087	85822248	85816315	85816434	85824470	85824522	0.304333	0.261333	0.312333	0.278333	0.287333	0.266	0.375667	0.354333	0.352667	0.322	0.362333	0.346333	0.269	0.256667	0.274	0.275	0.265667	0.264333	0.339	0.303667	0.119
0610009O20Rik	chr18	+	38258027	38258186	38258269	38258362	38257257	38257400	38259896	38260056	0.381333	0.402333	0.366	NA	0.396333	0.397667	0.545	0.544333	0.524667	0.527667	0.545333	0.506	0.386	0.402333	0.442667	0.382333	0.456333	0.44	0.529667	0.476667	0.179333
0610009O20Rik	chr18	+	38258269	38258362	38259896	38260056	38258027	38258186	38261063	38261285	0.501333	0.525667	0.534	NA	0.533	0.559	0.521667	0.534667	0.554667	0.543	0.556667	0.545333	0.507667	0.482	0.459	NA	0.489	0.517333	0.556667	0.489667	0.1
0610010F05Rik	chr11	-	23588634	23588734	23589950	23589983	23584519	23584611	23593425	23593525	0.112	0.0826667	0.082	NA	0.0593333	NA	0.178333	NA	NA	NA	NA	NA	NA	NA	NA	NA	NA	NA	0.213	NA	0.153667
0610010F05Rik	chr11	-	23615095	23615256	23617137	23617196	23611961	23612048	23620228	23620467	NA	NA	0.349667	NA	0.383	NA	NA	NA	0.486333	0.371333	0.358333	NA	NA	NA	NA	NA	NA	NA	NA	NA	0.136667
0610010F05Rik	chr11	-	23622435	23622529	23624935	23625122	23620228	23620467	23628872	23629027	NA	NA	NA	NA	0.275333	0.248	0.378667	0.408333	0.409667	0.375667	0.422	0.366	NA	NA	NA	NA	0.251333	0.277	NA	NA	0.174
0610037L13Rik	chr4	+	107890118	107890202	107891464	107891521	107889812	107889896	107891954	107892036	0.188667	0.114667	0.179667	0.143	0.229	0.114667	0.142	0.092	0.134667	0.117	0.134333	0.0896667	0.128667	0.133333	0.159	0.108	0.106667	0.147	0.114667	0.134	0.139333
0610037L13Rik	chr4	+	107891464	107891521	107891954	107892036	107890118	107890202	107892221	107892253	0.66	0.645	0.633333	0.608667	0.63	0.656	0.541667	0.566	0.532667	0.539667	0.529	0.538667	0.630333	0.657667	0.671333	0.639333	0.663333	0.666667	0.56	0.621333	0.142333
0610037L13Rik	chr4	+	107891954	107892036	107892221	107892253	107891464	107891521	107893333	107893411	NA	NA	NA	NA	NA	NA	NA	NA	0.499667	NA	NA	NA	0.583	NA	0.59	0.600333	0.625333	NA	NA	NA	0.125667
1110004F10Rik	chr7	+	116081357	116081412	116088273	116088414	116039396	116039771	116099439	116099523	NA	NA	NA	NA	NA	NA	NA	NA	NA	NA	NA	NA	NA	0.746667	NA	0.802	NA	0.333333	NA	NA	0.468667
1110004F10Rik	chr7	+	116088273	116088414	116097761	116097953	116081357	116081412	116099439	116099523	NA	NA	NA	NA	NA	NA	NA	0.0906667	NA	NA	NA	NA	0	0.427	NA	0.306	NA	0.114667	NA	0	0.427
1110004F10Rik	chr7	+	116093024	116093256	116097761	116097953	116088273	116088414	116099439	116099523	NA	0	0.0186667	0.0186667	NA	NA	0.0353333	0.0666667	0.0546667	0.187333	0.023	0.0613333	0.053	0.172	0.00933333	0.163333	0.0933333	0.0406667	0.055	0.0503333	0.187333
1110008L16Rik	chr12	+	55306338	55306386	55308736	55308869	55303615	55304884	55338159	55338267	0.206333	0.213	NA	0.269667	NA	0.326	NA	0.231	0.286667	0.273	0.328667	NA	0.268667	0.201	0.281333	0.225667	0.268667	0.237	NA	0.249667	0.127667
1110037F02Rik	chr4	+	11494763	11494879	11498739	11498826	11486042	11486105	11501308	11501357	0.484667	NA	0.517	0.514667	0.526333	NA	0.467667	NA	0.492	0.478	0.525667	NA	NA	NA	0.58	NA	NA	NA	NA	NA	0.112333
1110037F02Rik	chr4	+	11505441	11505610	11506953	11507076	11501308	11501357	11507906	11508179	0.399333	0.422333	0.37	0.351	0.378	0.33	0.451	0.437333	0.441333	0.474667	0.422333	0.48	0.364	0.369667	0.368333	0.380667	0.367	0.389	0.444	0.365	0.15
1110037F02Rik	chr4	+	11526594	11527139	11527647	11527883	11526346	11526440	11528537	11528790	0.264333	0.295	0.264	NA	0.225333	0.325333	0.360667	0.349333	0.346333	0.348333	0.364667	0.353333	0.209667	0.21	0.230667	0.223667	0.215333	NA	0.371	NA	0.161333
1110037F02Rik	chr4	+	11534188	11534321	11539909	11540062	11530827	11531045	11540480	11540641	0.472667	0.492	0.447333	0.480333	0.435333	NA	0.493333	0.502333	0.524	NA	0.547333	0.543	0.472667	0.491	0.493	0.471333	0.432333	0.458667	0.504	0.459333	0.115
1110037F02Rik	chr4	+	11534188	11534321	11542106	11542203	11530827	11531045	11544830	11544997	NA	NA	NA	NA	0.284333	NA	0.419	NA	0.469333	NA	0.498	0.492	NA	NA	NA	NA	0.29	NA	NA	NA	0.213667
1110037F02Rik	chr4	+	11544830	11544997	11545968	11546300	11542106	11542203	11548730	11548874	0.665667	0.689	0.669333	NA	0.670333	NA	0.611667	NA	0.588	0.586	0.582333	NA	NA	0.607	0.600667	0.583333	NA	0.588667	0.607	NA	0.106667
1110037F02Rik	chr4	+	11545968	11546300	11548730	11548874	11544830	11544997	11549544	11550684	0.482667	0.478	0.481333	NA	0.509	NA	0.389667	NA	0.383667	0.396667	0.374	NA	NA	0.453333	0.455	0.457667	NA	0.457	0.408333	NA	0.135
1110038B12Rik	chr17	-	34950697	34950847	34951884	34951925	34950240	34950475	34952135	34952173	0.563333	0.510333	0.502	0.527333	0.580333	0.528667	0.507	0.519667	0.471333	0.490667	0.486	0.476333	0.587333	0.594333	0.570333	0.584333	0.594	0.579333	0.517	0.516	0.123
1110038B12Rik	chr17	-	34950697	34950847	34952135	34952173	34950242	34950475	34952351	34952468	0.621667	0.515	0.554333	0.597667	0.614333	0.603	0.565333	0.552667	0.527	0.521	0.546667	0.512333	0.653667	0.647	0.650333	0.665	0.665	0.652667	0.556333	0.569333	0.152667
1110051M20Rik	chr2	-	91282464	91282660	91304748	91304833	91281745	91281855	91383728	91383859	NA	NA	0.434667	0.435	NA	NA	NA	0.439667	0.480667	NA	NA	NA	0.398667	0.381	0.403667	NA	NA	0.370333	NA	NA	0.110333
1110051M20Rik	chr2	-	91284234	91284320	91304748	91304833	91282464	91282660	91383728	91383859	0.401667	0.366	0.401667	0.371	0.360667	0.383333	0.506333	0.465333	0.488667	0.466667	0.477	0.477667	0.333333	0.298	0.341	0.304333	0.287333	0.308667	0.449333	0.379667	0.219
1110051M20Rik	chr2	-	91304748	91304833	91383728	91383859	91282464	91282660	91444568	91444680	NA	NA	NA	NA	NA	NA	0.885667	1	NA	NA	NA	NA	0.778667	NA	NA	NA	NA	NA	NA	NA	0.221333
1110051M20Rik	chr2	-	91304748	91304833	91383728	91383859	91284234	91284320	91421865	91421968	0.725	0.688	0.694	0.663667	0.680667	0.693667	0.696667	0.635333	0.637333	0.635333	0.666333	0.633667	0.693667	0.688667	0.679333	0.643	0.667333	0.680667	0.621333	0.650333	0.103667
1190005I06Rik	chr8	-	120611193	120611337	120628471	120628517	120608601	120609030	120634267	120634492	NA	NA	NA	NA	NA	NA	NA	NA	NA	0.0756667	NA	NA	NA	0.0376667	0.0716667	0.148667	NA	0.0723333	NA	NA	0.111
1500009L16Rik	chr10	+	83737908	83737933	83757444	83757480	83722864	83723034	83758133	83758213	0.549333	0.526	0.449667	0.416667	0.444667	0.446667	0.335333	0.409333	0.44	0.344	0.398	0.372667	0.603	0.603	0.592333	0.581333	0.619	0.507	0.384667	0.661333	0.326
1500009L16Rik	chr10	+	83737908	83737933	83759592	83759630	83722864	83723034	83761917	83762761	0.136	NA	0.147333	NA	0.105667	0.0973333	NA	NA	0.145333	0.102	0.127667	0.102	0.220667	0.268	0.180333	0.244	0.241333	0.170333	NA	NA	0.170667
1700001O22Rik	chr2	-	30796108	30796283	30796400	30796566	30795579	30795805	30797867	30797980	NA	NA	NA	NA	NA	NA	0.848667	0.785333	NA	NA	NA	NA	0.757333	NA	0.875333	NA	NA	NA	0.796333	NA	0.118
1700001O22Rik	chr2	-	30796144	30796283	30796400	30796566	30795562	30795805	30797867	30797980	NA	NA	NA	NA	NA	NA	0.706	0.630333	NA	NA	NA	NA	0.625667	NA	0.668333	NA	NA	NA	0.585667	NA	0.120333
1700025G04Rik	chr1	-	151915481	151915542	151921046	151921123	151884523	151893432	151980425	151980520	NA	NA	NA	NA	NA	NA	0.474	0.472	0.473	NA	0.487	NA	0.599667	NA	NA	NA	NA	NA	0.499	NA	0.127667
1700025G04Rik	chr1	-	151980425	151980520	152006544	152006767	151921046	151921123	152089931	152089970	0.259	0.205667	0.24	0.226	0.269333	NA	0.281333	0.281	0.298333	0.276667	0.268	0.314	0.275667	0.235667	0.229	0.248	0.281	0.275	0.309333	0.245333	0.108333
1700030K09Rik	chr8	+	72449449	72449741	72451358	72451432	72444749	72445470	72455113	72455567	NA	NA	0.538333	0.579333	NA	NA	0.513667	0.495667	0.478333	0.557333	0.487	0.486667	0.485333	0.500667	0.476333	0.454	0.523667	NA	0.481	0.518	0.125333
1700030K09Rik	chr8	+	72451358	72451432	72455113	72455567	72449449	72449741	72457972	72458068	NA	NA	NA	NA	NA	NA	NA	0.525667	NA	0.455333	NA	0.513333	NA	0.338	NA	NA	NA	NA	NA	NA	0.187667
1700037H04Rik	chr2	-	131151617	131151756	131153593	131153710	131148280	131148294	131159952	131160042	0.182333	0.161	NA	NA	NA	NA	0.339	0.370333	NA	0.340667	NA	0.323333	0.256333	0.241	NA	0.233667	NA	0.229	0.357667	0.269333	0.209333
1700037H04Rik	chr2	-	131151617	131151760	131153593	131153710	131148155	131148294	131159952	131160020	0.184333	0.163	NA	NA	NA	NA	0.341667	0.373333	NA	0.344	NA	0.326667	NA	0.243333	NA	NA	NA	NA	0.361	0.272	0.210333
1700037H04Rik	chr2	-	131151617	131151760	131153593	131153710	131148155	131148294	131159952	131160034	0.184333	0.163	0.201333	0.213667	0.175333	0.172667	0.341667	NA	0.361333	0.344	0.366	0.326667	0.258333	0.243333	0.271	0.236	0.246333	0.231333	NA	0.272	0.203
1700047I17Rik2	chr12	+	55205679	55205853	55210731	55210798	55199532	55199786	55212181	55212279	NA	NA	NA	NA	NA	NA	NA	NA	NA	NA	0.372667	NA	0.399667	NA	0.496	NA	0.432333	0.496667	NA	NA	0.124
1700047I17Rik2	chr12	+	55210731	55210798	55212181	55212279	55205679	55205853	55213839	55214076	NA	NA	NA	NA	NA	0.300667	NA	0.260333	NA	0.323667	0.272	0.361667	NA	NA	NA	NA	NA	0.242	NA	NA	0.119667
1700086O06Rik	chr18	-	38239572	38239751	38240838	38240953	38238404	38239189	38249713	38250198	0.554333	0.677333	0.604667	0.556333	0.634333	0.499333	0.739	0.697667	0.770333	0.702	0.719	0.738333	0.675	0.554667	0.569333	0.631	0.652333	0.605	0.844	0.718667	0.344667
1700088E04Rik	chr15	-	79136306	79136489	79139237	79139300	79135636	79135765	79140880	79140992	0.473	0.551667	0.377333	0.468333	0.443667	0.209667	0.0663333	0.305667	0.0896667	0.272667	0.0973333	0.250333	0.143667	0.403667	0.133333	0.429	0.103	0.366	0.504667	0.642333	0.576
1700088E04Rik	chr15	-	79139237	79139300	79140880	79140992	79135636	79135765	79141154	79141253	0.836333	NA	NA	NA	0.680333	NA	0.818667	0.819667	0.829667	0.696	0.777	0.621333	0.814667	0.78	NA	NA	NA	0.728333	0.739	0.752333	0.215
1700123M08Rik	chr4	+	11976443	11976587	11977456	11977570	11966573	11966683	11980141	11980408	NA	NA	NA	NA	NA	NA	NA	NA	0.390333	NA	NA	NA	0.771667	NA	0.558333	0.896667	0.703333	NA	0.456	0.504333	0.506333
1700123M08Rik	chr4	+	11976443	11976587	11980141	11980408	11966573	11966683	11993864	11993999	0.426667	0.666667	0.390333	0.457333	0.654	NA	0.482	0.569333	0.784667	0.577333	0.666667	0.559333	0.751	0.687333	0.697667	0.834333	0.589333	0.647667	0.604333	0.592333	0.444
1700123M08Rik	chr4	+	11977456	11977570	11980141	11980408	11966573	11966683	11993864	11993999	0	NA	NA	NA	NA	NA	0	0.300333	NA	NA	NA	NA	NA	NA	NA	0.483667	0	NA	0.303333	0.0566667	0.483667
1700123M08Rik	chr4	+	11977456	11977570	11980141	11980408	11976443	11976587	11993864	11993999	0.168667	NA	0.649667	0.0823333	0.523333	NA	0.350333	0.355667	0.150333	0.189333	0.287333	0.61	0.555333	0.181	NA	0.507333	0.300667	0.484	0.517	0.226667	0.567333
1810030O07Rik	chrX	-	12662649	12662829	12664499	12664649	12657861	12658024	12669526	12669646	0.420667	0.495	0.427333	NA	0.366	0.516	0.432333	0.459333	0.452667	0.452	0.486333	0.435	0.444333	0.422333	0.392667	NA	0.393667	NA	0.443	0.403333	0.15
1810030O07Rik	chrX	-	12664499	12664649	12669526	12669646	12662649	12662829	12673025	12673160	0.547333	0.44	0.495667	NA	0.523333	0.434	0.448	0.495	0.467	0.478333	0.449	0.458667	0.580667	0.549333	0.517	NA	NA	NA	0.487333	0.525	0.146667
1810043G02Rik	chr10	+	77979752	77979771	77980500	77980547	77978672	77978781	77981583	77981813	NA	NA	NA	NA	NA	NA	NA	NA	NA	NA	NA	NA	0.434667	0.327	NA	NA	NA	NA	0.246333	0.452333	0.206
2010107E04Rik	chr12	-	111962432	111962456	111963229	111963353	111961375	111961538	111966923	111966977	NA	0.562333	NA	0.695	0.606333	0.599	0.661667	0.643667	0.655667	0.646667	0.667333	0.65	0.662333	0.658667	0.641	0.653333	0.655667	0.642667	NA	0.603333	0.132667
2010107G23Rik	chr10	-	62109883	62110012	62110235	62110314	62107654	62109123	62110958	62111050	NA	NA	0.163333	NA	NA	NA	0.0483333	NA	0.0973333	0.105333	0.083	NA	0.0773333	0.145	0.121	NA	NA	NA	0.0626667	0.114333	0.115
2010111I01Rik	chr13	+	63061034	63061194	63068039	63068285	63033022	63033189	63156545	63156735	NA	NA	NA	0.522333	0.507333	NA	0.541	0.568333	0.407667	0.589667	0.453	0.485333	NA	0.625667	NA	0.514667	0.513	0.574667	NA	NA	0.218
2010111I01Rik	chr13	+	63068039	63068285	63156545	63156735	63061034	63061194	63170940	63171047	0.707	0.191667	0.661333	0.551333	0.647333	0.725667	0.398333	0.657667	0.475	0.467	0.500333	0.530333	0.512667	0.609667	0.662	0.577667	0.596333	0.535	0.549333	0.505333	0.534
2010111I01Rik	chr13	+	63068039	63068285	63170940	63171047	63061034	63061194	63190478	63190581	NA	NA	NA	NA	0.628667	NA	0.476	NA	0.536	NA	0.637	0.133333	0.378333	0.261667	NA	NA	0.530667	NA	0.522667	0.372667	0.503667
2010111I01Rik	chr13	+	63156545	63156735	63170940	63171047	63068052	63068285	63190478	63190581	NA	NA	NA	NA	NA	NA	0.479667	NA	NA	NA	NA	NA	0.388	0.193333	0.518	NA	0.458333	NA	NA	0.281	0.324667
2010111I01Rik	chr13	+	63170940	63171047	63190478	63190581	63068039	63068285	63191065	63191173	NA	0.0143333	0.047	0.012	0.107667	0.109667	0.0546667	0.0213333	NA	0.0263333	0	0.0343333	NA	NA	0.0423333	0.0536667	0.0856667	0.024	0.0546667	NA	0.109667
2010111I01Rik	chr13	+	63170940	63171047	63190478	63190581	63156545	63156735	63191065	63191173	NA	NA	NA	NA	NA	NA	NA	NA	NA	NA	NA	NA	0.394667	0.184667	NA	NA	0.428667	NA	NA	NA	0.244
2010111I01Rik	chr13	+	63199506	63199550	63210105	63210166	63191065	63191173	63240086	63240155	NA	0.213333	NA	0.287	NA	0.112333	NA	0.319333	NA	NA	NA	0.290667	NA	NA	NA	NA	NA	NA	NA	NA	0.207
2010111I01Rik	chr13	+	63210105	63210166	63240086	63240155	63199506	63199550	63240256	63240331	0.0906667	0.479333	NA	0.299333	NA	0.551	NA	0.284333	NA	NA	NA	0.312333	NA	0.267	NA	0.244333	0.0913333	0.332	NA	NA	0.460333
2010111I01Rik	chr13	+	63282141	63282258	63296857	63296944	63240256	63240331	63298711	63298856	0.193667	0.295667	0.234667	0.403	0.204	0.302	0.338333	0.285	0.285	0.344667	0.342	0.383	0.273	0.201333	0.272	0.228	0.273667	0.254667	0.338333	0.282	0.209333
2010315B03Rik	chr9	-	124295097	124295158	124295357	124295484	124293640	124294101	124304655	124304718	NA	NA	NA	NA	NA	NA	NA	0.0666667	NA	NA	NA	NA	0.09	0.0406667	NA	0.269667	NA	0.0383333	NA	0.0773333	0.231333
2010315B03Rik	chr9	-	124295097	124295158	124295357	124295484	124293830	124294101	124311675	124311899	0.354	0.249333	NA	0.260333	0.196333	0.199667	0.372667	0.402667	0.369667	NA	NA	0.376667	0.331	0.19	0.271667	0.421333	0.226667	0.198	0.372667	0.249667	0.231333
2010315B03Rik	chr9	-	124304655	124304718	124311675	124311750	124295357	124295484	124312559	124312671	0.915	NA	0.797	0.728667	0.893667	0.667	0.856	0.961	0.722667	0.857333	0.849667	0.852333	0.890667	0.887333	0.845333	0.898	0.846	0.968	0.876333	0.915	0.301
2210408I21Rik	chr13	+	77192553	77193223	77245200	77245362	77183600	77183769	77254122	77254217	0.294333	NA	0.439	0.361	0.385667	0.374	0.276	0.355333	0.371333	0.335667	0.317333	0.322333	NA	NA	0.351667	0.330333	NA	0.296	NA	NA	0.163
2310022A10Rik	chr7	+	27571563	27571701	27578712	27578783	27565646	27565728	27580336	27580691	NA	0.715333	NA	NA	0.754667	0.669667	0.61	0.634667	NA	0.596	NA	0.611333	NA	0.739	NA	NA	NA	NA	0.600667	NA	0.158667
2310030G06Rik	chr9	-	50741295	50741360	50742260	50742298	50739690	50740749	50746441	50746521	0.294333	NA	0.208333	NA	0.224667	NA	0.275333	0.692	0.165	NA	0.202667	NA	0.235667	NA	0.171667	NA	0.237	0.0476667	0.216667	0.189	0.644333
2310033P09Rik	chr11	+	59208968	59209051	59209127	59209200	59208819	59208865	59209307	59209393	0.609	NA	0.604333	0.557667	0.561	NA	0.612667	0.592333	0.603667	NA	0.638	0.604	0.651667	0.684667	0.712667	0.695	0.690333	0.660333	NA	0.724	0.166333
2310035C23Rik	chr1	+	105695427	105695503	105696500	105696596	105692883	105693177	105703930	105704043	NA	NA	NA	NA	0.399667	NA	0.520333	NA	0.594667	NA	0.517	0.469667	NA	NA	NA	0.497	0.431333	0.433333	NA	NA	0.195
2310035C23Rik	chr1	+	105731200	105731280	105734517	105734624	105727939	105727988	105735922	105736022	NA	0.506	NA	NA	NA	NA	0.326333	0.392667	NA	0.333667	NA	0.367	0.416667	0.467333	0.454333	0.355	NA	0.514667	0.332667	0.397	0.188333
2310035C23Rik	chr1	+	105740434	105740517	105741012	105741095	105735922	105736022	105741296	105741360	0.959	0.978333	0.935	0.979667	0.973	0.968667	0.947	0.981333	0.933333	0.981667	0.945667	0.988667	0.877333	0.967	0.878333	0.987333	0.882333	0.975333	0.957333	0.890333	0.111333
2310035C23Rik	chr1	+	105740434	105740517	105741296	105741360	105735922	105736022	105743210	105743349	NA	NA	0.238667	NA	NA	NA	NA	NA	0.442667	NA	NA	NA	NA	NA	NA	NA	NA	NA	NA	NA	0.204
2310057M21Rik	chr7	-	131350650	131351102	131357459	131357666	131338219	131343804	131360888	131360961	0.366	NA	NA	0.339	NA	NA	0.511667	0.444	0.494	0.506333	0.478333	0.554333	NA	NA	NA	0.311333	NA	NA	NA	NA	0.243
2310057M21Rik	chr7	-	131350650	131351102	131360888	131360961	131338219	131343804	131361732	131361936	NA	0.597333	0.547667	0.514667	NA	0.511	NA	NA	NA	0.519667	NA	NA	0.646	NA	NA	NA	NA	NA	NA	0.593	0.135
2310057M21Rik	chr7	-	131357459	131357666	131360888	131360961	131348691	131351102	131361732	131361936	0.417333	0.541333	0.493	0.403667	0.508333	NA	0.371333	0.362	0.418667	0.405333	0.349	0.384667	0.508333	0.494	0.495333	0.465	0.490667	0.494333	0.393	NA	0.192333
2410002F23Rik	chr7	+	44247237	44247416	44247909	44248059	44246786	44246823	44248251	44248295	0.634667	0.644333	0.579333	0.51	0.577	0.579	0.646333	0.537333	0.645333	0.535	0.558333	0.552333	0.639667	0.601333	0.61	0.522333	0.626333	0.584667	0.599	0.607	0.136333
2410002F23Rik	chr7	+	44247250	44247416	44247909	44248059	44246786	44246823	44248251	44248295	0.631333	0.656333	0.605333	0.509667	0.591	0.564333	0.602667	0.521	0.630333	0.522	0.540333	0.546667	0.590333	0.635333	0.581667	0.569333	0.594333	0.598667	0.588667	0.590333	0.146667
2410006H16Rik	chr11	+	62603234	62603282	62603596	62603646	62602876	62603023	62604402	62604466	0.672	0.635667	0.681333	0.656667	0.676	0.642333	0.59	0.57	0.575333	0.542	0.595667	0.561667	0.643667	0.713	0.701667	0.715667	0.699	0.733	0.560667	0.672	0.191
2410006H16Rik	chr11	+	62603234	62603282	62604402	62604466	62602876	62603023	62604654	62604807	NA	NA	NA	NA	NA	0.792333	NA	0.614667	NA	0.599333	0.635667	0.614667	NA	0.826	0.807667	0.832	NA	0.839	NA	NA	0.239667
2410006H16Rik	chr11	+	62603596	62603646	62604402	62604466	62603234	62603282	62604654	62604807	0.632	0.605	0.637	NA	0.589	NA	0.464	NA	NA	NA	0.465	NA	0.572667	NA	0.546667	NA	0.615667	0.588333	0.502	NA	0.173
2410018L13Rik	chr12	-	22958351	22958457	22992787	22992848	22953996	22954837	23009844	23010243	0.331667	NA	0.288	NA	0.347667	0.202333	NA	0.359333	0.410667	0.35	0.350667	0.448	0.564333	0.465667	0.458	0.482667	0.389	0.416333	0.286667	0.518667	0.362
2410089E03Rik	chr15	+	8170305	8170394	8171692	8171821	8169105	8169489	8174725	8174861	NA	0.503	NA	0.48	NA	0.368	NA	0.387667	NA	NA	NA	NA	NA	NA	NA	NA	NA	NA	NA	NA	0.135
2410089E03Rik	chr15	+	8188796	8188877	8194323	8194488	8188386	8188595	8199180	8199339	NA	NA	NA	NA	0.265333	NA	0.445333	NA	0.486667	NA	0.476	0.428333	NA	NA	NA	NA	0.274333	NA	NA	NA	0.221333
2410089E03Rik	chr15	+	8233763	8233868	8242269	8242341	8232045	8232100	8243802	8243912	0.589667	0.520333	0.713667	0.653	0.694667	0.742333	0.6	0.599667	0.541	0.665333	0.612333	0.621	0.608	0.695	0.628667	0.661667	0.652	0.654333	0.588	0.624667	0.222
2410089E03Rik	chr15	+	8242269	8242341	8243802	8243912	8233763	8233868	8244220	8244413	0.791	NA	NA	NA	NA	NA	0.635333	0.627667	NA	NA	NA	NA	NA	NA	NA	NA	NA	NA	0.638667	0.775	0.163333
2610005L07Rik	chr8	-	20399095	20399468	20401376	20401496	20385781	20388402	20405120	20405419	NA	NA	1	0.983	1	0.853333	1	1	0.996	1	0.992667	0.983333	1	0.993333	0.980667	0.989667	1	0.996667	NA	NA	0.146667
2610008E11Rik	chr10	-	79092411	79092504	79094430	79094557	79088286	79088379	79097457	79097600	NA	NA	0.666667	NA	NA	NA	0.565	0.591	0.587667	0.576333	0.594333	0.548	0.722667	0.748667	0.759667	NA	0.730667	0.741333	NA	0.743333	0.211667
2610020H08Rik	chr7	+	119799564	119799677	119801229	119801356	119794005	119794502	119802740	119802837	0.392	0.259667	0.41	0.247667	0.440333	0.250667	0.499333	0.457	0.357	0.417333	0.415333	0.441333	0.349	0.488	0.435	0.468	0.444667	0.338	0.444333	0.418333	0.251667
2610020H08Rik	chr7	+	119799564	119799677	119802740	119802837	119794005	119794502	119805142	119805286	0.363667	0.134667	0.279333	0.204	0.224333	0.153667	0.348667	0.352667	0.274	0.312667	0.332333	0.311	0.306667	0.325667	0.241	0.333667	0.298667	0.211333	0.366333	0.296333	0.231667
2610020H08Rik	chr7	+	119801229	119801356	119802740	119802837	119799564	119799677	119805142	119805286	0.42	0.395667	0.303	0.26	0.259333	0.241	0.318667	0.396	0.34	0.300667	0.423667	0.389333	0.338	0.33	0.310333	0.330667	0.319	0.279	0.367333	0.308333	0.182667
2610020H08Rik	chr7	+	119805142	119805286	119818382	119818471	119794129	119794502	119819431	119819547	NA	0.444667	0.258	0.391667	NA	0.269667	NA	0.201667	NA	0.241	NA	NA	NA	0.33	NA	NA	NA	NA	0.127667	0.233667	0.317
2610020H08Rik	chr7	+	119805142	119805286	119818382	119818471	119794150	119794502	119819431	119820856	0.384	0.444667	0.258	NA	0.327	0.269667	0.193333	0.201667	0.213667	0.241	0.185	0.239333	0.321333	0.33	0.217	0.316333	0.380333	0.367333	NA	0.233667	0.259667
2610020H08Rik	chr7	+	119805142	119805286	119819431	119819547	119794118	119794502	119823755	119823894	NA	NA	NA	NA	NA	0.182667	NA	0.17	0.182333	0.182	0.185	0.180667	NA	0.296	0.222333	0.276	NA	0.287	NA	NA	0.126
2610020H08Rik	chr7	+	119805142	119805286	119819431	119819547	119794129	119794502	119823755	119823894	0.324333	NA	0.2	NA	NA	NA	0.165333	NA	0.182333	0.182	0.185	NA	NA	NA	NA	NA	NA	NA	0.103667	NA	0.220667
2610020H08Rik	chr7	+	119818382	119818471	119819431	119819547	119805142	119805286	119823755	119823894	0.474	0.242667	0.476	0.401333	0.427667	0.292667	0.336667	0.335667	0.350667	0.342667	0.372	NA	NA	NA	0.361	NA	NA	NA	NA	NA	0.233333
2610020H08Rik	chr7	+	119819431	119819547	119823755	119823894	119805142	119805286	119827302	119827376	NA	NA	NA	NA	NA	NA	NA	0.171333	NA	0.0793333	NA	0.187333	0.0513333	0.06	NA	0.241	NA	NA	0	0.174333	0.241
2610020H08Rik	chr7	+	119819431	119819547	119823755	119823894	119818382	119818471	119824044	119824139	0.649333	0.584	0.62	0.662667	0.647333	0.576	0.639	0.616667	0.644	NA	0.653667	NA	NA	NA	NA	NA	NA	NA	0.542667	NA	0.12
2610020H08Rik	chr7	+	119823755	119823894	119824044	119824139	119819431	119819547	119825535	119825638	0.490667	0.631667	0.466	0.519667	0.400667	0.515333	0.621333	0.644333	0.627	0.668667	0.621667	0.647333	0.539	0.546333	0.606333	0.544333	0.554	0.572667	0.644	0.548667	0.268
2610020H08Rik	chr7	+	119824044	119824139	119825535	119825638	119823755	119823894	119827302	119827379	0.352667	0.234	0.312	0.332333	0.262667	0.293333	0.397333	0.415667	0.373667	0.483333	0.378	0.512667	0.375667	0.372333	0.44	0.404667	0.31	0.391667	0.472667	0.390667	0.278667
2610020H08Rik	chr7	+	119832670	119832775	119843241	119843334	119828091	119828206	119843847	119844064	NA	NA	NA	NA	NA	NA	NA	NA	NA	NA	NA	NA	NA	NA	NA	NA	0.512667	0.404333	NA	NA	0.108333
2610021A01Rik	chr7	+	41601747	41601815	41602877	41602997	41599284	41599400	41603435	41603465	0	NA	0.161	0	0.131667	0.339	0.228333	0	0.0513333	0.239	0.319333	0.187667	0.0886667	NA	0	NA	0.152667	0.179333	0.484667	0.129333	0.484667
2610021A01Rik	chr7	+	41612370	41612497	41613155	41613251	41611675	41611925	41624722	41624832	0.442	0.323333	0.465	0.455667	0.421	0.438667	0.459667	0.509667	0.554	0.424667	0.549333	0.429667	0.377667	0.324	0.476667	0.382667	0.476667	0.343333	0.447	0.4	0.230667
2610027K06Rik	chr11	-	85801788	85801943	85805390	85805562	85796153	85796284	85832167	85832209	0.149667	0.125667	0.0576667	0.192667	0.0426667	0.277	0.00966667	0.187667	NA	0.182333	NA	0.183667	NA	0.176	NA	NA	NA	NA	0.0173333	NA	0.267333
2610301B20Rik	chr4	+	10881800	10881868	10882406	10882472	10879522	10879610	10893262	10893358	0.384	0.431333	0.370667	0.391333	0.438333	0.405	0.379333	0.382333	0.381333	0.402	0.415333	0.414333	0.417333	0.461	0.454	0.445667	0.523	0.447667	0.387	0.453667	0.152333
2610301B20Rik	chr4	+	10882406	10882472	10893262	10893358	10881800	10881868	10897898	10899421	NA	NA	NA	NA	NA	0.0976667	NA	0.226667	NA	0.267667	0.215667	0.236	0.126333	NA	NA	NA	0.121	0.115	NA	NA	0.17
2610307P16Rik	chr13	-	28561440	28561579	28608517	28608628	28460777	28461061	28668369	28668704	0.716333	NA	0.776	NA	0.740333	0.498	0.735	0.720667	0.765667	0.714333	0.778667	0.691333	0.718333	0.695333	0.772667	0.736	0.696667	0.716	0.725	0.710333	0.280667
2610307P16Rik	chr13	-	28608517	28608628	28668369	28668704	28561483	28561579	28711116	28711208	0.093	0.228	0.106	0.052	0.125	0.360333	0.0793333	0.095	0.0923333	0.100333	0.086	0.0983333	0.109333	0.103667	0.0886667	0.103	0.100333	0.106333	0.118667	0.107	0.308333
2610307P16Rik	chr13	-	28669781	28669994	28711116	28711208	28668369	28668704	28772618	28772666	0.284667	0.273	0.274	0.176333	0.262	0.200333	0.229333	0.239333	0.262	0.265	0.232	0.217667	0.314667	0.287	0.326667	0.267667	0.317	0.270333	0.231	0.297333	0.150333
2610316D01Rik	chr3	-	45364629	45364751	45366304	45366348	45363699	45363787	45378141	45378260	NA	NA	NA	NA	NA	NA	NA	NA	NA	0.298333	NA	NA	NA	0.150333	0.323667	0.180333	NA	0.228667	NA	NA	0.173333
2610507B11Rik	chr11	+	78265178	78265239	78265572	78265762	78264463	78264582	78266350	78266474	0.369333	0.400667	0.393333	0.347	0.369333	0.364667	0.513667	0.495	0.509	0.496	0.502	0.505333	0.406	0.373	0.418	0.423	0.417667	0.398	0.495667	0.482333	0.166667
2610507B11Rik	chr11	+	78272777	78272969	78273096	78273299	78271290	78272383	78273440	78273559	0.684333	0.684	0.668667	0.668667	0.618	0.725333	0.548	0.578667	0.537667	0.605667	0.551333	0.588667	0.536333	0.53	0.543	0.519	0.531	0.516333	0.634667	0.526667	0.209
2610507B11Rik	chr11	+	78272777	78272969	78273440	78273559	78271290	78272383	78273681	78273902	NA	NA	NA	NA	NA	0.512667	NA	0.438	NA	0.466333	0.453333	0.41	NA	NA	NA	NA	NA	0.509667	NA	NA	0.102667
[truncated: 20,636 more rows]

## Sheet: RI
geneSymbol	chr	strand	riExonStart_0base	riExonEnd	upstreamES	upstreamEE	downstreamES	downstreamEE	E10.5_FNP_Ect	E10.5_FNP_Mes	E10.5_MdP_Ect	E10.5_MdP_Mes	E10.5_MxP_Ect	E10.5_MxP_Mes	E11.5_FNP_Ect	E11.5_FNP_Mes	E11.5_MdP_Ect	E11.5_MdP_Mes	E11.5_MxP_Ect	E11.5_MxP_Mes	E12.5_FNP_Ect	E12.5_FNP_Mes	E12.5_MdP_Ect	E12.5_MdP_Mes	E12.5_MxP_Ect	E12.5_MxP_Mes	Nasal_epi_E11.5	Nasal_epi_E12.5	MaxdeltaPSI
[truncated: 743 more rows]

[truncated: 2 more sheets: A5SS, A3SS]
