# Supplementary material for: An Alternative Splicing Program for Mouse Craniofacial Development
Source: Front Physiol. 2020 Sep 4;11:1099. doi: 10.3389/fphys.2020.01099 (PMC7498679; doi:10.3389/fphys.2020.01099)
Supplement: Supplementary file 6 [file Table_6.xlsx]

## Sheet: SE genes by age, layer, prom 
age	layer (Ect_vs_Mes)	prom.
Vps39	Epb41l3	1500004A13Rik
Vav2	Lef1	Eml4
Gpr137	St7	Map2
1500004A13Rik	Cttn	Fgfr1
Eml4	Atp11c	Lrrfip2
Lef1	Foxm1	Afap1
Map3k4	Fgfr1	Lsm14b
Map3k7	Sncaip	Clstn1
Dock9	Myo18a	Mpzl1
Mark2	Ctnnd1	Csnk1d
Nasp	Adam15	Mef2d
Foxm1	Evi5	Vegfa
Fgfr1	Macf1	Mprip
Ctnnd1	Scarb1	Myo1b
Pcnt	Epb41l2	Dctn1
Arhgef12	Lsm14b	Git2
Lrrfip2	Clstn1	Gnas
Map6	Sec31a	Phf21b
Scarb1	Fam126a	Dnmt3b
Lsm14b	Nf2	Slk
Tpd52	Ptprf	Itga6
Ssbp3	Csnk1d	Lmo7
Tnik	Mprip	Usp4
Mpzl1	Immt	Cadm1
Parp6	Dtnb	Slain2
Ptprf	Epb41	Ank2
Csnk1d	Flnb	Syne2
Mef2d	Myo1b	Ptprd
Immt	2019-09-06	Vav2
Mtcl1	Dctn1	Dock7
Epb41	Git2	Tnik
Arhgap17	Dnm2	Flnb
Pbx1	Inpp4a	Epb41
Myo1b	Fnbp1	Map3k4
Bin1	Add3	Ncam1
Dctn1	Synrg	Parp6
Git2	Depdc1a	Numa1
Gnas	Numb	Akap9
Add3	Golim4	Pbx1
Numb	Pbrm1	Ect2
Golim4	Usp4	Mta1
Slk	Pxdn	Scrib
Itga6	Pard3	Madd
Dock7	Scrib	Dst
Cask	Csnk1g3	Foxm1
Numa1	Mfge8	Golim4
Lmo7	Nfya	Clta
Usp4	BC037034	Kif1a
Cadm1	Rai14	Myo18a
Lsr	Mllt4	Phldb1
Scrib	Plod2	Depdc1a
Arhgef40	Ect2	Atp6v0a1
Smpd4	Enah	Ctnnd1
Csnk1g3	Nsfl1c	Synrg
Tmem87b	Arhgef11	Nfya
Mta1	Lrrfip1	Sh3bgrl
Tead1	Spag9	Tpd52
Nfya	Sptan1	Sft2d1
Slain2	Vav2	Rab12
Arvcf	Gnas	Epb41l3
Mllt4	Mta1	Napb
Ect2	Dlg1	Fam169b
Ank2	Fkbp7	Erc1
Trappc13	Inf2	Tacc2
Phldb1	Dock7	4933407K13Rik
Pla2g6	Phldb1	Sorbs1
Ehmt2	Map3k7	Meg3
Syne2	Rragb	Rragb
Fryl	Gas5	Bin1
Auts2	Plekha1	Adam15
Esrp1	Akap9	Fmnl2
Ppip5k2	Ocrl	Bbx
Ttc13	Erbin	Ppfia3
Ybx3	Dysf	Synj1
Mdm1	Myo5a	Zfp644
Sorbs2	Deaf1	Tsc22d2
Kifc3	Eif2ak1	Gltscr1
Tmem44	Dst	Elk4
Sorbs1	Reps1	Trappc13
Col2a1	Pcgf1	Nf2
Afap1	Ralgps2	Eif2ak4
Apbb2	Map4k4	Gfra1
Luc7l	Robo1	Nfasc
Clasp2	Fam53a	Enthd2
Plod2	Etl4	Zbtb18
Clasp1	Susd1	1700123M08Rik
Map2	Prss36	Cacna2d1
Arhgef10l	2410018L13Rik	Auts2
Depdc5	Wiz	Dleu2
Kalrn	Smg7	Gabbr1
Aim1l	Rffl	Fam65b
Rai14	Daam1	Kalrn
Anks1	Gnb1l	Slx4
Clstn1	Magi2	Slc25a35
Taf8	Ccdc136	Pbrm1
Ppfia3	5530601H04Rik	Dlx6os1
Depdc1a	Fam65b	Msantd1
Clk4	Ube2k	Gm45234
Fmnl2	Magi1	2019-09-06
Scube3	Kitl	1810043G02Rik
Pogz	Bptf	Fnbp1
Fndc3c1	Hdac9	Plekha1
Bbx	Lrrc16a	Cpt1b
Zfp207	B9d1	AW554918
Nav2	Mllt10	Dgkd
Apba1	Uap1	Rhbdl1
Hnrnpa3	Gm42906	Zcchc2
Pex5	Tmem164	Triobp
Spire1	Polg	Ptprt
Fn1	Flna	2010001A14Rik
Synrg	Rnls	Cln6
Pard3	Atf2	Slc43a1
R3hdm2	Golga2	Atp6v1h
Dst	Arfip1	Meaf6
Ktn1	Pigv	Wdr45
Prom1	1110017D15Rik	Sp8
Thap3	Tmprss6	Mapk8ip3
Hnrnpa1	Scn8a	Tmem44
Flnb	Parp6	Cnbd2
Tnk2	Acly	Ttc6
Osbpl3	Efna5	Yme1l1
Wsb1	Gkap1	Il1rl2
Tecr	Baiap2	Ahcy
Rnps1	Ccdc66	Stag3
Mpdz	Zc3h18	Cpeb4
Hnrnpk	Mid1	Numb
Baz2b	Ssbp2	Sorbs2
Eml2	Sfxn2	Prrc2b
Wdfy3	Gm1673	Dnajc8
Nme6	Mmgt2	C2cd5
Zmynd11	Pank2	Ccdc126
Cadps	Phf3	Ttll9
Prrc2b	Ank2	Wnk2
Rsrc2	Anks1	Cyfip1
Tcf7l2	Cuta	Acaa1b
Tlk2	Scube1	Kifc3
Atxn2	Gfra2	Synj2
Zcchc2	Atg16l1	Zfp839
Atp6v1h	Ntf3	Exoc1
Socs7	Zc3h7a	Gm3164
Isca2	Dctd	Nrcam
Uspl1	Mbnl2	Frmd4a
Kansl1	Klhl17	Tmem63b
Kif1a	Map3k10	Apbb2
Atp6v0a1	Dcun1d4	Ppp4r1l-ps
Tra2b	Clip1	Cep295
Wnk2	Slx4	Cacna1d
Tctex1d2	Rpl18	Rbsn
Mcrs1	Zranb1	Efcab5
Mapt	Rnf219	Lrrfip1
1700088E04Rik	Senp7	Tcaf2
4933431E20Rik	Mical3	Cda
Prrc2c	Igsf3	Golga4
Ppfia1	Cdc42bpa	Cep152
Wnk1	Armc2	Fgfr3
Cyfip1	Limch1	Slc9a8
Synj2	Ctbs	Mak
Fam65b	Tex2	Mbnl1
Limch1	Aste1	Sec16a
Fam135a	Shq1	RP24-122D14.3
Fgfr3	Pqlc2	Enah
Rab11fip3	Slc39a14	Tbc1d2
Map7d1	Ap2m1	Cpeb2
Acaca	Kif1a	Pank2
Ank3	Palm3	Gm26920
Ubp1	Tuft1	Igdcc4
Golga4	Oma1	Mfge8
Ildr2	Tnfrsf22	Ndor1
Fgfr2	Eml4	Tmem38b
St3gal3	Fancd2	Pgbd1
Ubr4	Tyw1	Josd2
Clta	Slc25a26	Col2a1
Meaf6	L3mbtl3	Tmem87b
Actg1	Dusp12	Pla2g6
Gltscr1	Cpt1b	Pnck
Dab1	Vstm2b	Snap91
Cpeb4	Ube2i	Usp3
Phactr4	Gm17066	Anxa9
Synj1	Ppp3cb	Nufip2
Nf2	Accs	Agap3
Commd10	Mark3	Ext2
Dtx2	Prr5l	2019-09-04
Cd44	Mcf2l	Wdr25
Robo2	Wsb1	Clcn2
Immp1l	Wdr78	Zc3h7a
Rab12	Ift46	5530601H04Rik
Ralgps2	Pld2	Dnase1l1
Sft2d1	Islr2	Srgap3
Ccdc142os	Nfkb1	Tnip1
Sec31b	D430042O09Rik	Atp5d
Madd	Trap1	Pcnt
Crtc2	Exoc1	Cd44
Arhgap12	Tlk2	Nav1
Wdpcp	Tmem44	Dab1
Pex2	AW554918	Hfm1
Lpin1	Gba	Fryl
Ncor2	Bcas3	Ilf3
Lrp8	Eif4a2	Ppt1
Cracr2b	Rab11fip3	Tnc
Cacna2d1	Pih1d2	Rab11fip3
Stk33	Pex2	Abhd1
Erc1	Arhgap12	Atpaf1
Ubqln1	B230311B06Rik	Cadps
Vkorc1l1	Gm13187	Sap18
Kif1b	Luc7l2	Gpr160
Plekha1	Fbxw11	Sec14l2
Tnip1	Tmem234	1700001L05Rik
Pbrm1	Ncam1	Ebf3
Kcnip2	Mbnl1	Pvt1
Plekha6	Specc1	Spata13
Cep152	Zfp286	Zscan25
Picalm	Frmd4a	Herc6
Gpatch2l	Abcg2	Abca4
Sema3f	Tbc1d22b	Nr2f6
Arid4b	5730455P16Rik	Rab34
Fnbp1	Dab2	Klf8
Bcl11b	Neil1	Gnl3l
Herc6	Syngap1	Bcl11b
Cpt1b	Atp6v0a1	Fam184a
Fam60a	Mast4	Aak1
Mfge8	Ccdc171	Hacd2
Mapkap1	Dgka	2010315B03Rik
Ccdc126	Clcn4	Xpnpep3
Gpbp1	Ccdc126	Mybl1
Gabbr1	Trpc1	BC029214
Ddr1	Pvt1	Osbpl1a
Akap9	Usp13	Top3b
Nr6a1os	Pnpla7	Rsrc2
Adgrg6	Fbrsl1	Emsy
Mapk8ip3	Mirg	Haus3
Ciz1	Rpain	Depdc5
Inpp4a	Kdm4c	Magi2
Parp11	Prr14l	Inpp4a
Pip5k1c	Mipol1	Acnat1
Cdc7	Fgfr1op2	Setx
Osbpl8	Stox1	Pla2r1
Brd8	Cacna1b	Ttll10
Crtc3	Dhx30	C330007P06Rik
Slain1	Ager	Adgrb2
Ehbp1	Galc	Foxk2
Zc3h14	Mbd5	Sox2ot
P2ry2	Cep57l1	Plekha6
Zfp839	Exosc1	Capsl
Tfap2a	Sin3a	Nat6
Dtx3	Myzap	Dzank1
Suco	Nme6	Gpr137
Nbeal1	Gm3164	Zfand4
Brwd3	Mtmr2	Sbf2
Tle1	Nin	Ppcdc
Ythdf3	Stx16	Trpc1
Icosl	Arntl2	Tfb2m
Enthd2	Eri2	Whsc1
Ttc3	Tia1	Nol4
Amn1	Vps13b	Neil1
9430038I01Rik	Lrrk2	Ppp1r9a
Parpbp	Cep295	Ptprs
Epb41l3	2610020H08Rik	Fam161a
Tmed5	Nexn	Klk10
Pkd1	Mettl9	Gstm6
Csnk2a1	Rps6kb1	Ank3
Tarbp2	Tctn1	Fnbp4
Epb41l2	Hmgb2	Fam188a
Tsc22d2	Pald1	Tpcn2
Rapgef2	Arhgef6	Zmym1
Nap1l4	Dnm1l	Mrps10
3110053B16Rik	Fdxr	Ptpn4
Ptprd	Focad	Slc22a17
Lrsam1	Calml4	Krtcap3
Etl4	Slc9a8	Kcnma1
Dnajc8	Airn	Cracr2b
Htt	Prrg2	Eme2
Sbf2	Kalrn	Arhgap12
Kctd17	Tpd52	Syngr4
Uggt1	Uba3	Csf1
TINCR	Meaf6	Ccdc150
Nrxn2	Hfm1	Bcas3
AW554918	Cul1	Dab2
Tial1	Slc38a6	Rccd1
Trim26	Firre	Brap
Plec	Awat2	Sipa1l1
Stx2	Rad9b	Diaph2
Syt8	Cdk12	Epb41l2
Nckap5	Dab1	Rc3h2
Dcun1d4	Jak3	Urb1
Pcgf2	Suco	Tmem164
Dab2	Ssbp4	Phf20l1
Slc38a10	Mia3	Glrb
Emc10	Tmem68	Ccdc138
Phf8	Dclk1	Invs
Pstk	Speg	Gm8281
Napb	Zfand6	R3hdm1
Atg13	Mpzl1	Plekhm2
Tmem8	Rcbtb1	Mttp
Mmgt2	Kif21a	Zfp711
Paqr5	Cda	Phactr4
Hnrnpa2b1	Hps5	Lpin1
Hpf1	2610301B20Rik	Fam149b
Myo9b	Pcnt	Araf
Plag1	Lpin1	Pnpla7
Ncoa6	Pot1b	Tcf7l2
Bcas1	Syt9	Morf4l1
Macc1	Iqsec2	Ccs
Trmt112	Col16a1	Kidins220
Ccnc	Adcyap1r1	Cep44
Kank1	Fam169b	Gm8206
Sort1	D3Ertd751e	Plekha2
Anxa9	Dpep1	Ccdc28a
Guf1	Kynu	RP23-218K15.5
Kcnh2	Zfp523	Capg
Fbxo34	Prr3	Diaph1
Zfp275	Nav1	Ap4e1
Rpl13	Rad23a	Tars2
B230312C02Rik	Eme2	Urgcp
Celf3	Rpl10	Cacnb3
Lpgat1	Stxbp5	Nhsl2
Itga10	Rarg	Dock4
Nemp2	Wnk2	Chpt1
Tlk1	Pld3	Zfp688
Cul1	Arhgap4	Susd2
Ndel1	Psma3	Slc35d2
Caprin2	Tmem241	C330021F23Rik
Cds1	Epn2	Mgat4a
Gtf3c2	C330021F23Rik	Pisd-ps1
Mtf2	Madd	Kif27
Pld3	Polm	Ergic2
Arhgap39	Glb1l	Rgs14
Meg3	Prrc2c	Jmjd1c
Kyat1	Zfp956	Cacnb1
Tmem176b	Itga6	Tvp23a
Cacna1d	Osbpl9	Foxp1
Iqce	Kcna6	Dcun1d4
Zfp106	Asphd2	Cask
Slx4	Birc6	Mapkap1
Gm20521	Baz2b	Csnk2a1
Sdccag8	Eif2ak4	P2rx4
Kynu	Dnmt3b	Ubr4
Tpt1	Postn	Tcte2
Zfp523	Brca1	Slc25a53
Zfp644	Ept1	Airn
Sobp	Fam193b	Msantd2
Nsun3	Mapkapk3	Tbc1d31
Kirrel3	Mpc1	Slc35c2
Acin1	Tfdp2	Map3k7
Rragb	Mrpl33	Crem
Pik3cb	4930432K21Rik	Pate2
Cyp4f16	Ranbp17	Ppp1r12b
Zfp280d	Slc26a11	Gmip
Zfp945	Arhgef19	D930020B18Rik
Rpl17	Pikfyve	Ccdc142os
Slc29a1	Pnkd	Phf8
Cep112	Stap2	Rapgef2
Ppp4r2	Lmo7	Tex9
Huwe1	Cyb5r4	Kmt2e
Nrcam	Cask	Dennd6b
Mttp	Atg4b	Scn3a
Ywhaq	6430548M08Rik	Zfp106
Smc6	Zfp141	Miat
Elavl2	Sdr39u1	Acbd4
Pdp1	Dnase1l1	Rbm41
Nav1	Brms1l	B230312C02Rik
Cnot2	Hnrnpk	4833439L19Rik
Gm42906	C330007P06Rik	Hpf1
Setdb2	Cbx3	Timm23
Miip	Katnal2	Tpk1
Slc38a6	Phlpp2	Zfp455
Exoc1	Myo9a	Ggt5
Lhfpl1	Iqsec1	Mutyh
Slc4a7	Stat5a	Trpv4
Mettl9	Gm44965	Lrp8
Sbno1	Pgap2	Tmem241
5930412G12Rik	Eif5a	Mbd4
Col25a1	Slc38a10	Rims2
Arhgap27	Tanc2	Tm6sf1
Nutf2	Whsc1	Zfp354c
St7	Rabep2	Nav2
Sun1	Arhgef9	Lmf1
Rell2	Hpn	Ppil2
Eml5	Cobll1	Rnft2
Abhd1	Icosl	Tecr
AA986860	Hmcn1	Letm2
Gm44206	Kif23	Ddhd1
Nhsl2	Fzd6	Slc25a40
Psma3	Rps27	Clk4
Emid1	Espn	Vps39
Zmym5	Tex9	Dtx2
P2rx4	Fbxo10	Gria4
Cux2	Mrpl48	Rfx2
Mtch2	Gm44973	Gmfg
Ankrd29	Mknk1	Trpv6
Adam15	N4bp1	Aldh3a2
Ap2m1	Ggta1	Smc2
Ppp3cb	Gse1	Tex26
Rabep1	Rad52	Fgfr2
Tarbp1	Tpd52l1	Ccdc163
Cyp4f13	Gm16576	Rapgef1
Uxs1	Fstl5	Prr3
Tmub2	Anxa9	Sdccag3
Psd3	Rpe	Foxo3
Urb1	Tmem119	Bend4
Trpc1	Hps3	Aifm3
Slc7a10	Osgepl1	Sez6l2
Tmem168	Aplp2	Fsd1l
Rhot1	Mrps18b	Fam126a
Zfp532	Erc1	Ern1
Exosc1	Tmem127	Unc93b1
Snx19	Mtg2	Sobp
Itfg2	Ankrd24	Pgap2
A730017C20Rik	Pkm	Fnip2
Cda	Thap6	Cstf2
Myo18a	Epb41l4b	Wnt10b
4833439L19Rik	Cherp	Atf7ip
Srpx	Ctdspl	Ccdc57
Rapgef1	Dvl1	Nsmf
Ntan1	Gm11110	Zbed5
Map3k12	Rundc3b	2410018L13Rik
Gprasp1	Rhot1	Arfip1
Phf20	Exoc6b	Gm18190
Foxk2	Atg13	Sfxn2
6430548M08Rik	Pja2	Gm10658
Acnat1	Crem	Speg
Trnau1ap	Dock4	Magi3
Mina	Pafah2	Cdk12
Igsf1	Trim25	Tead1
Six3os1	Ddhd1	Tyk2
Atl1	Supt20	Ggta1
Pknox1	Rnf32	Fam185a
Hacd4	Zfp384	Pcdh19
Zfp668	AC149090.1	Rgl3
Tenm2	Napg	Gstp2
Eif2ak4	Edc3	Vcan
Oma1	Arhgap18	BC065397
Arhgap29	Adamts3	Ano1
Fam49b	Meis3	Slc38a10
Rpl10	Ccdc163	Zfp62
Ptbp3	Arsk	Napg
Pde7a	Zfp521	Gmpr2
Dnaaf3	Nt5dc1	Tpst2
Crnde	Cacna1h	2410124H12Rik
Ccdc150	Arfgap1	Rps6kc1
Dhx30	Hacl1	Serac1
Zfp1	Akap11	Mapkapk3
Lcor	Prdm9	Atl1
Ttll10	Scml2	Tec
Bicc1	Slc9b2	Mxra7
Rrp36	Gm28551	Gm28042
Ano1	Dnajc1	RP23-431O7.9
Srsf6	Sema6a	Postn
Tmem127	Ssh3	Kyat1
Rgl1	Zfp558	Rims1
Spata1	Carnmt1	Ccl25
Mcph1	Ttll3	Gspt2
Zfp617	2019-09-10	Atat1
Myo6	Prdm5	Def8
Adamts6	Clcn7	Gpr83
Idh1	Mtmr3	Crebl2
RP23-218K15.5	Arpc5l	Klhl18
Nup210l	Syne1	Zfp862-ps
Zbtb49	Dot1l	Casp8ap2
Atpaf1	Rnf130	Dusp12
Zfp276	Gm20517	Fbxo9
Klhl14	Srpk2	Armc2
Tbc1d13	Sltm	Rad23a
N6amt1	Phykpl	Ctbs
Msantd3	Smarca2	Lrrc61
2610316D01Rik	Cmc2	Gkap1
Rims2	Gpr180	Cldn34c1
H2-T10	Zfp217	Nasp
Srpk2	Slc30a9	Ranbp17
Dennd3	Gstz1	Cttn
Fnbp4	Sema4c	Zfp286
Ppp1r9a	Slc46a1	Pan3
Ccdc39	Sfi1	Rpusd3
Cish	Snhg11	2310035C23Rik
Smarca2	Clcn2	Arhgdib
Zfp827	Zfp827	Tmem68
Kat7	Paox	Prkag2
Ip6k2	Kars	Scn8a
Plekhb1	Fam175a	Ppp1cc
Syt14	Ube3a	D3Ertd751e
Mpv17	2010001A14Rik	Tuft1
Ddhd1	Bicc1	Jpx
Rffl	Layn	Tle1
Cacnb1	Nap1l1	Zfp2
Fsd1l	Cracr2b	Aftph
Frmd4a	Ythdf2	Prss36
H2afy	Pcsk4	Pald1
Slc25a53	Cep164	Ruvbl2
Rps6ka5	Ppip5k1	Zfp870
Zc3h7a	Pdgfd	Snx13
Syngr4	Rhbdd3	Osgepl1
Scamp4	Prdm16	Glb1
Rps6kc1	Nrd1	Ercc6l2
Sncaip	2810403D21Rik	Psma3
Tex264	Ipmk	Atg16l1
Btf3l4	Fbxo34	Clcn7
Bod1l	Ogfod2	Camsap1
Gad1	Pigp	Gm17066
4930522L14Rik	Josd2	Wdr4
Wnt10b	Zfp644	Zdhhc20
Far1	Timm23	Tctn1
Kidins220	Haus3	Ghdc
Slc35g1	Cep128	Tdrp
Rfx2	Pbx4	Sec22a
Stim1	Zfp263	Suv420h1
Gm3164	Dennd6b	Arsk
Kcnab2	Ckmt1	Slc39a14
Apba2	Zfp65	Gm44973
Trip4	Cdan1	Tipin
Zfp821	Tnik	Rps6kb1
Nfasc	Sbf2	Crim1
Tatdn3	Mttp	Zfp788
Trim25	Glb1l2	Fam35a
Nt5c3	Gnb1	Lrrc16a
Nup35	Gm14322	Rps27
Itgb3bp	Vopp1	Specc1
Poln	2610027K06Rik	Zscan18
Slc2a4rg-ps	Cdpf1	Syne1
Rhbdl1	Uspl1	Pja2
Stox2	Fggy	Wdr78
Carf	Ddhd2	Ice1
Elavl4	Ddx59	Mga
Tpcn2	Gpank1	Haus2
Dpp7	Mgat5b	Luc7l2
Xpo6	Pecam1	Ftx
Cuedc2	Abtb1	Scml2
Suv39h2	Zfp862-ps	Setdb2
Osgepl1	Osbpl11	Ric8b
Dnajb6	Cacna2d1	Cetn4
Fam161a	Asxl3	2310057M21Rik
Lypd6b	Ppp4r2	Ddx58
Fam192a	Kdm3b	Kcnk2
Gmip	Zfp931	Topors
Osr2	Abi1	Gtf3c4
Zfp568	Mroh1	Cbx3
Preb	Ccdc82	Mettl20
Smox	Hemk1	Nphp1
Mas1	Dyrk1a	Foxd2os
Mapkapk3	Fopnl	Fbrsl1
Luzp1	Slc35d2	Mbd5
Stag3	Rpusd3	Ints7
Pappa	Bcl11a	Exosc1
Khk	Zfp454	Rnf219
Rnf130	2010315B03Rik	Ube2i
Tex9	Gm28042	Tbc1d22b
Zfp708	Tnk2	B130024G19Rik
Ttc28	Dync2h1	Dgka
Pex5l	Apmap	Scamp5
Sh3pxd2a	Amn1	Srd5a3
Dcun1d1	Rfwd2	Atp5l
Fnip2	Ftx	Iqce
Zkscan8	Espl1	Uba3
Mgat4a	Slc25a53	Mtg2
Chka	Erg	Mroh1
Emsy	Fam188a	Sergef
Adar	Pitpnm2	Myzap
Fam21	8430429K09Rik	Pcsk4
Pcdh19	Pif1	4930447C04Rik
Mdm4	Ift52	Lime1
Stx8	Zfp711	Oma1
Syne4	Gstp2	Gfra2
Mzf1	Bin1	Nudt21
Adgrb2	Fam172a	Hmgb2
Ndor1	Tdrp	Lsm5
Pou6f1	Cadm1	Rin3
Fam221a	4930522L14Rik	Gpank1
Mbd4	Ydjc	Kxd1
Capg	Vps8	Adam22
Fam184a	Elk4	Pqlc1
Camta1	Gk	Cdhr4
Hmgn5	Ppp1r9a	Crnde
Bcas3	Gm11837	Pdcd10
Met	Clk4	Mia3
Myef2	Trit1	Gabpb1
Zzz3	Prkcz	Spata7
Napg	Cbarp	2900076A07Rik
Fance	Slc4a1ap	Asic4
Glb1l2	Echdc2	Ppip5k2
Cep170	Rell2	5930412G12Rik
Lrp8os2	Eme1	Slc9b2
Gm20517	Asna1	Inf2
Gnmt	Sp4	Prmt9
Rad54b	Gabpb1	Cul1
Dnmt3b	Wdr25	Slc26a11
Foxo3	Fbxo48	Vps13b
Tm7sf2	Dcbld1	Rbpms
Ythdf2	Lcorl	Brms1l
Lrrc14	Dmc1	Fam118b
Nexn	Flot2	Mvb12a
Taf15	Ccdc157	Disp1
Pank2	Surf1	Ccdc136
Ccdc88b	Crlf1	Nol12
Sharpin	Spata2	Rhbdf2
Gpr19	Zfp788	Mrpl33
Dlg4	Vamp7	Csn3
Fat3	Gm27177	Lcorl
Slc26a11	Ocel1	Pum1
Msrb3	Tfb2m	Slc30a6
Cbx3	Ttc21b	Pcnx
Nnt	Nprl3	Exosc7
Katnal2	Zbtb34	Gm11110
Gnpda1	Zfp821	Idh1
Srcap	Brpf3	Epn2
Cpeb2	Ndor1	Tmcc1
Magi3	Scoc	Zfp280d
Hs1bp3	Tm7sf2	Cd200
Nsmf	Klhl18	Adgrl1
Fam118b	Eci2	Cep350
Marveld2	Mtrr	Fgfr1op2
U2surp	Fhl1	Pnkd
Rnf14	Morf4l1	Ankzf1
Nudt21	Fignl1	Gm42906
Gm28285	Usp1	Zfp12
Haus3	Prc1	Espl1
Klhl26	Gng12	Ube4a
2610021A01Rik	Aldh3a2	Anapc13
Slc12a9	Crim1	Dlg1
Otud7b	Sdk2	Mknk1
Gm14418	Mettl25	Dnm2
Nadsyn1	Pcgf2	Ube2d2a
Zfp961	Zfp346	Zscan29
Bicd1	Ube2d-ps	Sdr39u1
Irgm1	Myo9b	Slc35e1
Asxl3	Foxo3	Arhgef40
5031425E22Rik	Ccdc191	Galc
Rgl3	Crnde	Crtac1
Klhl18	Gm13212	Kntc1
R3hdm1	Tdp2	Col27a1
5530601H04Rik	Ezh2	Tmem127
Tub	Sirpa	Spats2l
Mettl24	Dclk2	Ppp4r2
Ppcdc	Plxna3	CH25-588N10.2
Bach2	Zfp961	Nt5dc1
Crem	Mff	Ap3m1
Ralgapa2	Vegfd	Pard3
Casc4	Erlec1	Rcsd1
Zfp862-ps	Pex1	Etv6
CH25-588N10.2	Mcph1	Ppfia4
Ahcy	Bnc2	Ctps2
Tmem25	Rbm33	Ago4
Rprd1b	4932438A13Rik	Aprt
Eif3j1	Zfand4	0610037L13Rik
Sema6c	Asxl2	Pou6f1
Ccdc157	Blvra	Agbl2
Ccp110	Arid3c	Gm14418
Gnl3l	Kyat1	Fbxl12
Slc25a40	Mus81	Nexn
Lrrc49	Sgms1	Gm4890
D930015E06Rik	Tbp	Slc25a14
Aim2	Adprm	2610301B20Rik
Kifc2	Phactr2	Mpg
Gabra4	Scmh1	Fam219b
Mtm1	Mtx2	Eaf2
Mtmr14	Cyp2d22	Slx4ip
Gpr83	Fbxw7	Eldr
Cuta	Cetn4	Cbarp
Tec	Kctd18	Fam193b
Slit2	Dmpk	Carnmt1
Gm16973	Emc8	Hax1
Igsf9	Usp10	Zfp219
Dot1l	Ccdc127	Phykpl
Prr14l	Aim2	Dnmbp
Cacna1a	Pcmtd1	Slc8a2
Ptpn13	Raet1e	Helq
Sec16a	Carm1	St7
Zmynd15	Pms2	Dvl1
Unc93b1	Zscan29	Hesx1
Tuft1	Ppcdc	Ttll3
Bhlhb9	Ppp4r1l-ps	Tmem108
Eme1	Wnk1	Tdrd7
Rcbtb1	Nuak1	Kcnab2
Slc25a35	Ikbkb	Gm28557
Gls	1500004A13Rik	Whrn
Cyp2d22	Fam60a	Trmt2a
Lsm5	Cep350	Dhx33
1110034G24Rik	Arhgap9	Mrpl48
Fam149b	U2af1l4	Gm16973
Clcn4	Dnajc16	Adam17
Slc35d2	5031425E22Rik	Eef1d
Mamdc4	Pnldc1	Surf1
Dnajb4	Ddr1	Sgip1
Ccdc28a	Foxj3	Zfp931
Smyd4	Pde2a	Prdm9
Wasf3	Suv420h1	Fam173b
Rock2	Kansl1	Zbtb37
Rpl10a	Bcl2l12	Relb
Scn8a	Lrsam1	Dnajc1
Cldn34c1	Dixdc1	Tbcel
Stxbp5	9430091E24Rik	Pigb
Kif20b	Dbt	Myo9a
Pabpc4	Paip2	Dyrk2
Crlf3	Gm20324	Ptges3
Gm1673	Iscu	Prkdc
Mllt1	Eif3j1	Peli2
Hdgfrp3	Senp6	Phldb2
Bag6	Dnajc8	Katnal2
Ube2i	4930427A07Rik	Ppm1h
Zscan29	Atat1	Rnf150
Acly	Hectd2	Rusc2
Fbxo9	Pkig	Dennd1a
Psmf1	Cbfa2t2	Nipa2
Smurf2	Slx4ip	Gpr19
Gkap1	Spaca1	Comt
Zfp286	Ltn1	Egfl8
Papola	Tmem38a	Mamdc4
Prss36	Hjurp	Aste1
Rpl18	Asxl1	Cacna1c
Usp1	Fam193a	Dmtn
Rer1	Narfl	Focad
Nnat	Rnf14	Spaca1
Lrrc16a	Mtm1	Cflar
Dnase1l1	Mbd4	Actr3b
Fopnl	C530008M17Rik	Uspl1
Map2k7	Adar	Mdm4
Foxd2os	Adamts9	Ank1
2410004B18Rik	Setdb2	Gpr155
Atf2	C330018D20Rik	Kdm4c
Mipol1	Trnau1ap	Slc7a7
Rps6kb1	Racgap1	Ydjc
Bcl2l12	Myh14	Fopnl
Armc2	Snx19	Prrg2
Scly	Ubap2l	Atp2b4
Fam35a	Tmem218	2610203C20Rik
Zfp362	Zfp866	Dhx30
Pafah2	Gtf2h2	Ttc3
Zfp454	Heph	Cep128
B3gnt5	Elmod3	Ctdspl
H2-T22	Setd3	Zcrb1
Mtmr2	Rock2	Gpatch4
Nt5dc1	Fgf13	Aim1l
Usp13	Fnbp4	Exoc6b
Strn3	Cln6	Smpd4
Gtf3c4	Mettl6	Senp6
Rassf1	Slc12a6	Decr2
Zfp516	Ccdc88a	Fap
Ctbs	Fam219b	Kdm5c
Polg	Gripap1	Crebrf
Rpl27a	Stil	Fam21
Zfp638	Lyrm1	Zfp263
Adnp	Slc35e1	Map4k3
Fam53a	Vrk1	2410002F23Rik
Rps27	Ubxn11	Dmc1
D3Ertd751e	Naga	Ntf3
Asna1	Gm29609	Zfp217
Slc18b1	Sorbs1	Golgb1
Ranbp17	Slit3	Cbfa2t2
Psmg4	Pbx3	Gm28285
Gpsm1	Txlng	Bnc2
Mad2l2	Cdk10	Cherp
Senp1	Cep55	Mycbp2
Sema4c	Notch2	Slc1a3
Gm11110	Cd82	Smim10l1
Dusp12	Frrs1	Ager
Mink1	Sik3	Osr2
Fbxw11	Smc2	Fendrr
Gsn	Tmem260	Mgat5b
Blm	Kpna2	Lrrc17
Mtg2	Zfyve16	Rassf1
Dennd4c	Slmap	Khk
Slc35e1	RP23-414P13.3	Faim
2810403D21Rik	Zfp950	Lrsam1
2610301B20Rik	Gclm	Eif4g3
Sptan1	Sharpin	Mpc1
Ntf3	Scaf1	Smpdl3b
Gstz1	Hnrnpl	Zfp558
Cdc42bpa	D2hgdh	Phc3
Orc1	Mib2	Bex1
Pum1	H13	Ltn1
Usf2	Cbfb	Fam172a
Tars2	Zfp870	H13
Zfand4	Hmgxb3	Ccdc173
Abca4	Slc7a10	Plxna3
Szrd1	Zkscan1	Tmed8
Zranb1	Sun2	Gpm6b
Rbm10	Slc25a40	Usp10
2310035C23Rik	Egf	Zfp638
Tctn1	Pkd1	4921504A21Rik
Cdc14b	Cdc123	Tnrc6b
Irf2	Hnrnpa3	Fignl1
Klhl17	Ep400	Rcbtb1
Trp53i11	Fance	Icosl
Srd5a3	Inpp4b	Dhtkd1
Chek2	Rims1	Mus81
Haus2	Gm26648	Ift52
Rad54l	Maf	9930021J03Rik
Eif4a2	Wwp1	Ten1
Plagl1	Trim68	Slc22a5
Morf4l1	Mdga1	Rab7
Efcab10	Mboat2	Zfp532
Setd3	A730017C20Rik	Tex2
Rpusd3	Adnp	Sri
Hacl1	2700049A03Rik	Csgalnact2
Tmem241	Dcun1d2	Hps3
2700049A03Rik	Phka1	Tyw1
Layn	Klhl26	Polm
Wdr25	Pter	Ube2l3
Tdrp	Tmem80	Dync2h1
Whsc1	Nectin3	Wnk3
Fam71e1	Evi5l	Echdc2
Epn2	1700123M08Rik	8430429K09Rik
Gm44973	Acaca	Pcgf2
Lrriq1	Col2a1	N4bp2l2
Ltn1	Lrrfip2	Scmh1
Kif23	Dennd5b	Gphn
Med14	Vegfa	Rab10os
Sugp2	Eif4g3	Tbp
Rbck1	Slk	Itch
Dclre1c	Slain2	Zfp408
Reps1	Cd44	Lins1
Atm	Spire1	Hbs1l
Gm20422	Dgkd	Bcl11a
Fbrsl1	Syne2	Col16a1
Dgka	Ganab	Gdpd5
Cttn	R3hdm2	Agbl5
Bptf	Cald1	Atm
Ppfia4	Phactr4	Pex2
4933430I17Rik	Auts2	Rpl14
2019-09-10	Fgfr2	Dlc1
Gm20498	Cpa2	Ipmk
Ager	Bbx	Ikbkb
Eme2	Vps39	Dpep1
Smim8	Tmem63b	Ptk2
Sox17	Mtcl1	Meis3
Rusc2	Pbx1	Eci2
Rnls	Uggt1	Pqlc2
Gulo	Nbeal1	Acvr1
Megf6	Tsc22d2	Arhgap9
Asic4	Rapgef2	Hnrnpk
Gabpb2	Herc6	Dixdc1
Abhd5	Epn3	Slit3
Hps5	Nutf2	Aim2
Gpank1	Map2	Brpf3
4933408B17Rik	Arhgdib	Dip2b
Ttc5	Nop56	Fndc3c1
Mbd5	Tmem87b	Lmbr1
D430042O09Rik	Mapk8ip3	Dcbld1
Carnmt1	Atp2b4	Tdp2
Hmcn1	Slc37a3	Dnm1
Adal	Zfp280d	Pde7a
Tbp	Tcf7l2	Ppa2
Vstm2b	Numa1	Kctd17
Spata5	Triobp	Cdk19
Pih1d2	Gstk1	Dhodh
Mbnl2	Rapgef1	Rptor
Gm973	Tle1	Zfp451
Ept1	Ip6k2	Tufm
Dpep1	Sap18	Lcp1
Eps15l1	Ttll5	Flot2
Hdac9	Snx13	Pomgnt1
Osbpl9	Usf2	Mtch2
Atrx	Gmfg	Fbxl18
Ubap2l	Prkcb	Slc35a2
Rasl12	Lime1	Sgms1
Prr3	Enthd2	Zfp668
4930432K21Rik	Smox	Adgrg3
Ptger3	Prpf39	Ercc6
Phtf1	Rbm41	Cep57l1
Galc	RP24-122D14.3	Spa17
Arid3c	Gspt2	D430042O09Rik
Me2	Sh3d21	Chmp2a
Dnm1l	Col25a1	U2af1l4
B3galnt2	Zcchc2	Mrpl27
Zbtb18	Picalm	Ctla2b
Rai1	Emsy	Sfi1
Def8	Ttc3	Osbpl6
Tmem234	Ppp1cc	Fam227a
Baiap2	Dennd1a	Eef2k
Stap2	Sobp	Tom1
Ddx3y	Copg2	Cdkl3
Ikzf1	Cipc	Golga2
Ssc4d	Rcsd1	Setd4
Ggta1	Zbtb37	Mtrr
Gpr180	Nipa2	Cables1
Arnt	Pear1	Mettl16
Gpr155	Nufip2	Fbxw11
Ptprs	Tnip1	Dnal1
Armcx1	Tead1	4930402H24Rik
Gm11837	Adgre5	Glb1l
Relb	Crispld1	Setd3
Ppp2r2d	Lrrc61	Pemt
Kmt5a	Kcnk2	Lamtor3
Gm4890	Dleu2	Jak3
Sdccag3	Sall1	Pigp
Mthfsl	Ice1	Nuak1
Nsfl1c	Acrbp	Vangl1
Ccdc61	Trps1	Kars
Cacna1b	Fam198b	Abcd4
Lrrc27	Zfp839	Dot1l
Tex2	Sergef	Fbxo10
Nek1	Msantd2	Immp1l
Rnf170	Prkag2	Zfp827
Hmgb2	Myef2	Rnf38
Slmap	4930503L19Rik	Zdhhc1
Hps3	Msantd1	Baiap2
D2hgdh	Ppox	Myrf
Tmem164	2310057M21Rik	Slmap
Pum2	Zdhhc20	2700062C07Rik
Spats2l	Cage1	Hemk1
Ccdc66	Tipin	Cd82
N4bp1	Usp48	E130307A14Rik
Kpna2	Btbd11	Mtmr1
Zfp931	Gpr137	Rbm33
Fbxl12	Mpdz	Ccdc191
Gabpb1	Phf20	Ggcx
Aak1	Syngr4	Myo19
Arpc5l	Osbpl3	Kpna2
Fbxo10	Sgip1	Eri2
Zfp384	Arhgap17	Notch2
Focad	Cacna1d	Mettl6
Tsr3	Mettl20	Med15
Grin1	Mtif2	Fbxw7
B130024G19Rik	Cyfip1	Gtf2h2
Tcaf1	Sec31b	Grip1
Pnkd	Baiap2l2	Zfp991
Mia3	Mapt	Kctd18
Lrrk2	Tcaf2	Ptpn13
Tmem40	Fip1l1	Ddr1
Scube1	Lipg	A730017C20Rik
Phlpp2	B130024G19Rik	Rspo2
Dguok	Pou6f1	Tia1
Nudt6	Camk2d	I830077J02Rik
Etv6	Eif4enif1	Ubap2l
Mdn1	Srsf11	Blvra
Extl3	Ccdc103	Gm44619
U2af1	Aspg	Dbt
Specc1	Cstf2	Ubxn11
Edc3	Tpcn2	Cep63
Unc45a	Snx16	Tab2
Zfp972	Fgfr3	Hsd17b7
Zfp12	Map3k4	Slc39a11
Tac1	F8	Syngap1
Slc39a14	Gin1	Tmem234
Mknk1	Aprt	Arntl2
Epb41l1	Map7d1	Mipol1
Opa1	Lemd3	Txlng
Pald1	Dmtn	RP23-414P13.3
Mmab	Slc43a1	Elmo2
Adam22	Mga	Mettl5
Eif4g3	Rusc1	4930452B06Rik
Brms1l	Nudt6	Zfp239
Raph1	Dcaf6	RP24-77E13.10
Ints7	Slc25a43	Inpp4b
Sdr39u1	Neurl1a	Dmpk
Ccdc191	Dlx6os1	Tmem143
Rcor3	Kxd1	Kmt2c
Gfra4	Sdhc	Hnrnpf
Gnb1l	Pramef8	Tmem260
Thnsl2	Cdkl3	Senp7
Rpl27	Ccdc60	Gnb1
Tbc1d22b	5930412G12Rik	Hhat
Ap2b1	Adgrl1	Fam204a
Crlf1	Uty	Kcne3
Prdm5	Aif1l	Col13a1
Eri2	Zfp219	Macf1
Naa16	Sytl2	Zkscan1
Zdhhc20	Ebf3	Fbf1
Asphd2	Nhsl2	Mfsd8
Edrf1	Crocc	Pnldc1
Zfp788	Stag3	Kdm3b
Cbfb	Atp2a3	Clasp1
Mpc1	Atp9b	Tmem57
Styx	Fbxl18	Robo1
Rin3	Ska2	Slc36a4
Ube2l3	Rapgefl1	Sik3
Rad9b	Ccdc15	Zfp850
Pja2	Fmnl2	Carm1
Dyrk2	H2-Q7	Hmgxb3
Fut10	4933407K13Rik	Ssc4d
Nab2	Rnf38	Iqck
Slc30a6	Piezo1	Gclm
Dnal1	Tert	Fam162b
Ccdc80	Nup62cl	Rtn4
Adamts3	St3gal3	Evi5
Glis2	4930480K23Rik	Abtb1
Egf	Spaca6	Smad7
Wdfy2	Senp5	Fign
Cep350	Gsn	Setd2
Ankzf1	Spink10	Gm26648
Mcm9	Gatb	Xpa
Htra2	Zfp507	Ecm1
Mrpl48	Dennd4c	Zfp937
Itch	Zkscan7	Bhlhb9
Luc7l2	Aak1	Naa16
Sirpa	Rc3h2	Gnmt
Gm16576	Atp11a	H2afy
Vps13b	Glrb	Cept1
Gm28042	Rev3l	Glis3
Pitpnm2	Abcd4	Rell2
Pramef8	A830080D01Rik	Lhx6
Ybey	Mvb12a	Nap1l4
Lrrfip1	Gm10406	Nckap5l
Islr2	Ecm1	Rad9b
Azin2	Mycbp2	Neto2
Inip	Pdgfrb	Bcas1os1
Cfap69	Scamp5	Mbp
Prrx1	Stk25	Zfp708
Brpf3	Tmem139	Zfp426
Neil1	Ankrd13d	Lpcat2
Cep57l1	Pde7a	Slc29a3
Calml4	Zfp874b	Tnrc6a
Pkm	Strn3	Mettl9
Trmt11	Cfp	Ablim3
Wdr4	Gm14418	Gm21811
Asxl2	Apbb2	Ccdc114
Zfp956	Acap3	Ndrg3
Pfkfb3	1810013D15Rik	Ist1
Scml2	Tec	Mas1
Fam53c	Ddx58	Tgif2
Tmem175	Sema4d	Wdr91
Cbfa2t2	Msi2	Gpr87
Chmp3	9230110C19Rik	Mrps35
Ptpn4	Pla2r1	Dhcr7
Pemt	Fbxo17	Klhl26
Erbin	Plpp7	Aph1a
Tom1	Ift88	Gng12
Bnc2	Lmcd1	Hnrnpa2b1
Fam73a	2900076A07Rik	Ythdc2
Ankrd24	Helq	Ccdc97
Gnb1	Hbs1l	D030028A08Rik
Ikbkb	Ano1	Gm9801
Tle2	Nadk2	Lef1
Magi2	Ank3	2019-03-08
Rev3l	Dnmbp	2410004P03Rik
Cherp	Ccl25	Mettl17
BC029214	Trpc3	Atp5g2
Mark3	Slc25a14	Hmgn5
Mapkapk5	Cd40	Noxo1
Rnf38	Kank1	G2e3
Golga2	Stk19-ps1	Intu
Inf2	Aasdhppt	Polh
Plpp7	Ptprs	Dnaaf3
Nlgn3	1810043G02Rik	Nfatc2
Dhtkd1	Bcor	Ifi27
Kcne3	Gprasp1	Ankrd29
Abi1	Nup210l	3110053B16Rik
Sin3a	Zfp28	Srcin1
Egfl8	Sec24a	Smyd4
Syne1	Golgb1	Ccdc34
Lins1	Tro	Zfp384
Wwp1	Prkdc	Xpo6
Ppm1h	Dnm1	Raph1
Exoc6b	Nudt21	Il15
Fip1l1	Spata17	Rnf170
Myo9a	Actg1	Stard10
Ruvbl2	Cacnb3	Ppp1r26
3830406C13Rik	Ankrd27	Nutf2
Arhgap4	Zfp638	Ctsa
Deaf1	Ankrd13c	Ppargc1b
Atg16l2	Atf7ip	Phyhd1
Mum1l1	Gm21811	Hs1bp3
Slc22a5	Tcte2	Ppp3cb
Hesx1	Wipf3	Ncoa7
Adgrl1	Relb	Suco
Syk	Ubn1	Raet1e
Smg6	Tatdn1	Slc25a43
Clcn7	Kntc1	Gm26902
Znrf1	Tom1	Zfp202
Zfp2	Rusc2	Ccdc39
Dnajc1	Ptpn4	Arhgap39
Kif21a	Stx11	Gm3604
Ppp1cc	Hacd2	Kcnu1
Cklf	Csnk2a1	Zbtb49
Ylpm1	Ralgps1	Bcor
Ccdc134	Ddias	Gm5148
Zfp609	Rif1	Ric8a
Rian	Brap	Saa1
Esco1	Gtf2ird1	Fxyd7
Golgb1	Commd1	Prrt2
Ptges3	6820408C15Rik	Bnipl
Arntl	2610005L07Rik	Gm2762
Cd82	Mybl1	Cdk8
Mid1	Gpr155	Lemd3
Eif5a	Radil	Gm16835
Anapc13	Chpt1	Mylpf
Prr5l	Keap1	Ccar2
Ftx	Pcdh7	Gm973
Rad52	Sh3bp4	Ccm2
Syngap1	Nkain4	Ldlrad4
Sgsm2	Mppe1	Camk2d
Drp2	Zscan22	Nup210l
Uggt2	Smpd4	Dcst2
Sec14l2	Kcnq4	Bbof1
Rpe	Kif24	Zfp287
Mrpl27	5033428I22Rik	Mllt10
Dctd	Kcnc3	Apol7d
Mrps10	Kctd20	Me2
Tex30	Sorbs3	Rad52
Slc46a1	Rbfox2	Gon4l
Invs	Nek4	Hpse2
Hnrnph2	Unc93b1	Kat2b
Ydjc	Nemp2	Ccdc159
Cpxm2	Stim1	Rps6ka5
Espl1	Rpl13	Elavl2
Ccdc136	Txnrd1	Pcgf1
Dcbld1	RP23-218K15.5	B230208H11Rik
Ccdc163	Zfp426	Il3ra
Cep128	Ldah	Gm11827
Pck2	Gm8206	Pramef8
Slc37a3	Khdrbs3	Plpp7
Adam17	Ikzf2	Irf2
Tsku	Mettl16	Rnf32
Tpd52l1	Rin3	Slc35g1
Ap5s1	Nmi	Ikzf1
Rfwd2	Cep152	Map6
Hscb	BC029214	Dtwd2
Slc22a17	Gmeb2	Chchd6
E130307A14Rik	Fancm	4933431E20Rik
Lats2	Camk2g	Nmi
Mllt10	Eldr	Sema6c
Lrrc17	Zc3h12b	Ctso
Ap3m1	Ccdc142os	Myo15
Enox2	Lypd6b	Rapsn
Zfp870	Ccdc173	Cpxm2
Fbxw7	Dnah1	Exoc3l
Pam16	Kmt2c	Zfp618
Ddx58	Stard8	Lacc1
Dtwd1	Bcl11b	Thada
Arhgef9	Zfp68	Hmgcl
Fgf13	Mok	Dolpp1
Zcchc9	Letm2	Cacna2d3
Tufm	Agap3	Chmp3
Fam160a2	Kif27	Gm16070
Sh2b3	Krtcap3	Osbpl9
Nphp1	Foxk2	Bcl2l12
Gin1	Gmip	Serp2
Mboat2	Runx2	Stx11
Dynlt1a	Rreb1	Atg2a
Aftph	Zmym5	Iffo1
Nfic	Miip	Wdfy3
Sft2d2	Ercc6l2	Ccdc85a
Epc2	Runx1t1	Slco5a1
Atxn2l	Napb	Arid3a
Hsd3b6	Cpa5	Porcn
Firre	Clock	Akap11
Glb1l	Trpv4	Gm5860
Cep63	Hdac4	Paox
E130114P18Rik	Pdlim7	Isl2
Abtb1	Kmt2e	Cbs
Map3k14	Ppip5k2	6430531B16Rik
Lemd3	Cap2	Pkd1
Stmn1	Eaf2	Fam122b
Zfp451	Hpf1	Actn2
Mrps17	Zdhhc3	Ccdc66
Rapgefl1	Exog	Sipa1
Erg	Trub2	Oprl1
Ift52	4921504A21Rik	Maml2
Spata6	Tvp23a	Ska2
Bcl11a	Pde10a	Mpdu1
Mfsd8	Zfp526	Erlin2
Cdkl3	Disp1	Abcg5
Gphn	Enox2	Lrrc73
Senp6	BC065397	Zfp949
Ccdc25	Sgce	Spns2
Mutyh	Map4k3	RP23-235J18.1
Tipin	Nsmf	Prkcz
Map4	P2rx4	Plekha4
Fam173b	Cnot2	Myo5a
Tia1	Smim10l1	Gm7173
Camsap3	Cspp1	Dnah7b
Dip2c	Syt7	Pibf1
Matr3	Lins1	Ehmt1
Gtf2a2	Scamp4	Fam92a
Spa17	Pitpnb	Chst10
Pknox2	St6galnac6	Adamtsl1
Prkcz	Gm4924	6430573F11Rik
Dixdc1	Polr3gl	1700016H13Rik
Tspan32	Ncoa7	Gm15265
Dlc1	Upf3b	Ube2q2
Gripap1	Fam184a	Fancc
Mus81	Pcdh19	Mrpl52
Ganab	Itga10	Nkain4
Med7	Kifc3	Hs6st2
Itgb8	Kctd9	Tspan17
Rhbdd3	Ube2n	Cpne1
Rc3h2	Cflar	Myh14
Coq2	Aim1l	Apba2
Kctd20	Mocs2	Trit1
Dcp1b	Traf3	Pms2
Ninl	Eml5	Ccdc15
Slc4a1ap	Slc2a8	Senp8
Shq1	Txndc11	Zfp595
Trim33	Fbxl3	Tmem25
Vps51	Zfp865	Tacc1
Tfb2m	Gpm6b	4932441J04Rik
Eci2	Gm10658	Phka1
Arfgef2	Arhgap1	Zfp956
Mxra7	Coasy	Crlf2
Adcyap1r1	Mbtps2	Mapk12
Iscu	Col4a5	Cables2
Gtf2i	Hspa14	Gnpda1
Sh2b1	Pdpk1	Zfp609
Dync2h1	Stradb	Cux2
Lmbr1	Sra1	Mapre3
Cyb5rl	Wdr59	Npm2
Ipmk	Taz	Plekha5
Txndc11	Dnajb4	Runx1
Slit3	Megf6	Gm3512
Hemk1	Tm6sf1	Greb1
Zfp560	Zbed5	Syt8
Rnf135	Anpep	Pdzd2
Dnm1	Herc2	Fastk
Bmf	Acsl6	Mtss1
Zcrb1	Vill	Optc
Ryr1	Agbl5	Phf3
Rccd1	Greb1	Klc1
C330007P06Rik	Slc1a3	Acrbp
Nol4	Frmd7	Gorasp2
Srp19	Dip2a	Rai1
Ccdc159	Itpr1	Zfp275
Kars	Stag1	Pde10a
Gm13212	Ist1	Nudt6
Stmn4	Zfp532	Rbm25
Dnajc4	Efemp1	Slc38a6
Fam193b	Aasdh	Ttll5
Egfl7	Lipo3	Samd8
Narfl	Cep126	Gm10516
Rbm33	Ercc6	Gm28496
Sarnp	Rsad1	Sbf1
Garnl3	2310035C23Rik	Ppp2r3a
Vps8	Rpap1	Gm20324
Pcgf1	Cadm3	Mppe1
Usp10	Palb2	Rbm12b2
Cetn4	Fam71f2	Pbx4
Dock6	Pigx	Ube2d-ps
Tor1aip2	Araf	Eno1
Mecp2	Raph1	Popdc2
Postn	Tpp1	1700010I14Rik
Ank1	Crebrf	Gm26782
Fendrr	D030028A08Rik	Tsga10
Iqsec2	Map2k4	Fam196b
Plxna3	Actn2	Trpc6
2610020H08Rik	Unc5b	Tert
Pnpla7	Aen	Stat4
Fam172a	Ktn1	D430036J16Rik
Tk2	Gpatch11	Sh3tc2
Trappc2	Zfp369	Tnrc6c
Pantr1	Ppp6r3	RP23-389N20.2
Slc30a9	Atad3aos	Prdm2
Fignl1	Nr2c2	Rbm6
Dleu2	Prpf40b	Hsd3b7
Tmem143	Ppp1r16a	Pnkp
St6galnac6	Snap91	Kif24
Ctsa	Wdyhv1	Cyp7b1
Ccdc127	Cenpc1	Adcyap1r1
Thap6	G630016G05Rik	Kcnc3
Stil	Sgf29	Neb
4930503L19Rik	Rnf214	Me1
Aspg	Ccdc120	Yipf2
Atg16l1	Jmjd1c	Tsc22d1
Kmt2c	Upp1	Gm44965
Nuak1	Os9	Endov
Phf3	Arid5a	Eva1c
Usp40	Ptprd	Pisd-ps2
Sec22c	Ndufab1	Ypel4
Pnldc1	Dnajb6	Ptk2b
Thsd1	Ubap1	A630001G21Rik
Ccnd3	BB218582	Adgra3
Cyb561a3	Srrm1	Cadps2
Slx4ip	Zfp235	Zfp607b
Ermard	Plpp2	Nrg1
Tmed8	Rprd2	Ttc39a
Rnasel	Tsku	Tbx3os1
Kctd18	Ccdc57	Fam71e1
Ten1	Arhgef40	Ankrd24
Nrf1	Tecr	Colgalt2
Dennd5b	Pla2g6	Sox17
Blvra	Abl2	Irf7
Egln1	Ggps1	Fbxo34
Abi3	Emid1	Med16
H2-Q7	Fam35a	Hlx
Fastkd2	Arhgap29	Iqcb1
Notch2	Dnajb14	Gmeb2
Mtx2	Nhej1	Zfp516
Mphosph9	Arhgef10l	Clasrp
Kdm5c	Blm	Stxbp2
2900076A07Rik	Hnrnpdl	Mpdz
Wdr78	Cyp39a1	Taf6l
Park7	Clasp1	Akap17b
Pcsk4	Zbtb8os	Timm21
Ypel1	Eefsec	Bap1
Yipf1	Zfp276	BC006965
Irf5	Ppt1	Pot1a
Dlg1	Zfp114	Gm14403
Kansl1l	Atp8b3	Kif15
Pcnx	C2cd3	Pcdh11x
Fbf1	Tmem205	Rsl24d1
Clcn2	Mef2d	Cep78
B3gntl1	E130307A14Rik	Lat
Dtnb	Nat6	Epn1
Wnk3	Ndel1	Stk25
2810474O19Rik	2019-03-08	Pogk
Dus4l	Ncoa6	C230035I16Rik
Gtf2h2	Arhgef7	Ccdc171
Tubg2	Dguok	Kif1b
C130026L21Rik	Zc3h11a	Foxn2
Pdgfd	Chmp2a	Gbp9
2010315B03Rik	Synpo	Nr2c2
Aprt	Gng8	Rbm5
Cdk12	Spry1	Axl
Birc6	Snx29	Garnl3
Mgat1	Map7d2	Dhx58
Gm14403	Kctd17	Akap12
Hmgxb4	Pogk	Faxc
I830077J02Rik	Zfp433	Acss3
9230110C19Rik	Tbc1d13	Itfg2
Usp5	Prom1	2700049A03Rik
Smad7	Inpp5a	T2
Rundc3b	Haghl	Gria2
Scmh1	Uhrf2	Rsph10b
Elk4	Zfp512b	Capn15
Arhgef19	Usp29	Kdm4b
Lcorl	Zfp512	Zfp523
Hhat	Axl	Kmt2d
Sik2	Foxd2os	Mta2
H13	Pds5b	Dmxl2
Uap1	Kat5	Cnot2
Mirg	Depdc5	Acaca
RP23-414P13.3	Tcf12	Srsf6
Med15	Cep78	Tra2b
Med23	Tulp4	Arhgap17
Ccdc82	Ppfia4	Wipf3
Sik3	Lrp8	Ogfod2
Zfp217	Chd7	Mapt
Slc43a2	Pum2	Tpt1
Tab2	Lrrc51	Pkig
Fam193a	Zfp639	Cdon
Tmem260	Hdac7	Fam229b
Emx2os	Tars2	Slc1a4
Osbpl1a	Ncor1	Usp29
Cdk19	Adat1	Npepl1
Rrm2b	Bicd1	Rgl1
Hsdl2	Fars2	AC149090.1
Gclm	Invs	Zc3h3
Plekhj1	Qrich1	Ndel1
Mtrr	Klc1	Thap7
Fam188a	Cyb5rl	Cyp4f13
Suv420h1	Acin1	Tmem8
Cacna1c	Stra13	Lyrm1
Col13a1	Dcp1b	Tanc1
Gas5	Pxmp4	Erc2
Slc36a4	Zfp939	Fam83g
Ikzf4	Fam49b	Ip6k2
D11Wsu47e	Ptpdc1	Cdpf1
Fam208b	Txnrd2	Tnnt1
Gtf2ird1	Tpm3	Kirrel3
Pcmtd1	Rere	Hdac9
Banp	Apol7d	Dlst
Dlst	Herc3	Gm43720
Neurl4	Slc6a17	Pld3
Fam162b	Zhx1	Kcna6
Porcn	Prkx	Pcsk2os1
Ocel1	Wbscr27	Ccna1
Fhl1	Slc29a3	Adamts9
Slc9a5	Efcab12	Etl4
Tvp23a	Ccdc186	Efcab12
Cep164	Wdr91	Trim25
Ints10	Cyp7b1	Zkscan6
Ppp3cc	Sh2b3	Stmn4
Wiz	Trafd1	Notum
Mak	Edrf1	Bbs9
Meis3	Phc2	Ube2e2
Tyw1	Ttc41	Cdc7
Pkig	Sars2	Gm4724
Zdhhc1	Fam83g	Stox1
Eri3	Prdm10	Fbxo6
Cyb5r4	Wdpcp	Tanc2
Proser3	Zgrf1	Usf2
Zdhhc3	Trappc9	Tex264
Myzap	Ppp6r2	Ddx11
Setd2	Spata6	Racgap1
Arhgef6	Ago3	6430548M08Rik
Gm26648	Mink1	Gm44206
Spaca1	Atp5sl	Kat6b
Ist1	Map4k1	2610020H08Rik
Mdga1	Npnt	Plagl1
C330021F23Rik	Rab10os	Atp11a
Ctage5	Sh3tc2	Syne4
Tdrd7	Mdm1	Dguok
Zfp952	A230056P14Rik	Cklf
Fam134c	Ppp3cc	Ago3
Elmo2	Zc3h3	Ckmt1
Eif2a	Tmem173	Tmem80
Slc9b2	Decr2	Tlk2
9930021J03Rik	Phkb	Ankrd65
Urgcp	Swt1	Msi2
Anks6	Dtwd2	Etnk2
Zfp239	Acad10	Scube1
Ube2s	Ipo11	Gm20517
Kif27	Pde4dip	Gng8
Mms19	Phf21a	Zfp574
Prdm9	Pogz	Clec16a
Ptov1	Zfp1	Iqsec1
Prepl	Vps33b	Rab11fip5
Fam136a	Zranb3	Dclk2
Ppig	Tcaf1	Trap1
Mprip	Tmem41b	Sspo
Rbpms	Eml2	P2ry2
4933407K13Rik	Zmym4	Glb1l2
G3bp2	Tmem8	Lrp11
Aup1	Apc	Kcnq4
Srcin1	Magohb	Rffl
Tgif2	Mark2	Spata6
Rgs22	Rps19	Nrk
Oas1c	Taf4	BB218582
Atp2c1	Tyw3	Nipal2
Lipg	Qser1	Gm20521
4833418N02Rik	Tada3	Plcb4
Zfp354c	Eif2a	Lhfpl1
Dgkd	Gm43720	Dcun1d2
Ccdc103	Slc25a16	Poln
Tm9sf4	Zfp688	Col25a1
Triobp	Serac1	Sltm
Cog7	Mir99ahg	Sncaip
Zscan25	Agbl2	Rnf207
Myo19	Ambra1	Fuz
Myo7a	Tbl1xr1	Slc16a7
Glb1	Gtf3c4	Synpo
Akap8	Prr13	Pappa
Zfyve26	Sipa1l1	RP23-114B10.6
Gm16835	Nsun3	Bicc1
Ttc6	Trpm4	Dennd1b
Alg6	Emx2os	Tyms
Cep55	Pcnx	Ovgp1
Keap1	Ubn2	Lrr1
Nufip2	Fxyd3	Gm11744
Zbed4	Edem2	Slc22a21
Atp5g2	Acsf2	5031425E22Rik
Ccdc173	Aamdc	Morn1
Adamts17	2610035D17Rik	Tenm4
Ssx2ip	Tom1l2	Lyar
Lig1	Dynlt1a	Lemd1
Hexdc	Ghdc	Fut2
Cln6	Rps6kc1	Map4k1
Ccdc114	Endov	Xylb
Pisd-ps1	Igf1	Amn1
Kcnk16	Necab2	Naaladl1
Glis3	Plagl1	Phactr2
Bbs9	Kdm6a	Gprasp1
Zc3h10	Serinc2	Lsm7
Ciart	Fras1	Cep55
Cep78	Wnk3	Lax1
Ssh2	Fam229b	Cyp2d22
Gm16867	Ube2d2a	Fbxo48
Tmem108	Zfp518b	Oscp1
Slc25a43	Hip1r	Aamdc
Gpr87	6330408A02Rik	Bcas1
Flot2	Ddx11	Src
Scoc	Uvssa	Dap3
Mbnl1	C2cd2l	Slc2a8
Tcaf2	Abhd1	4930523C07Rik
D030028A08Rik	Stxbp3	St6galnac6
Sult5a1	Usp15	Elmod3
Mrpl55	Fam13b	Gm3752
Tacc2	Eno1	E230016M11Rik
Pvt1	Pigq	Asb1
Pkp4	Ermard	Mboat2
Csnk1g1	Ccnt1	Zscan22
Eno1	Inpp5e	Ssh3
Pi4kb	D1Ertd622e	Atg4c
9030622O22Rik	Pex11g	Mki67
Fam185a	Uap1l1	Wdr17
Cpne1	Dnal1	Slc7a10
Ablim3	Btbd19	Tsr3
Tnrc6c	Azi2	Eif3j1
Mroh1	Mrps17	Gabra4
Faxc	Fam227a	Mir99ahg
Hbs1l	Gm4724	Zdbf2
A830052D11Rik	Lin52	Gprin1
Camsap1	Ncor2	Gpr180
RP23-431O7.9	Kif16b	Fance
Tecrl	Lrr1	Wdyhv1
Catsperd	Gnpda1	C530008M17Rik
Abcd4	Tacc2	Sec31a
Igsf3	Tbcel	Adamts10
Fbxl18	Zc3h14	Ubap1
Slc43a1	Immp1l	Tpd52l1
Hfm1	Myo19	Map1a
Lrp12	Trmt44	Vstm2b
Nr2f6	4933431E20Rik	Plekha8
Rbm26	Wdsub1	Appl1
Rttn	Zfp518a	Dctd
Card14	Mcoln1	Paxip1
Rin2	Mettl17	Asphd2
Csad	Ccnyl1	Atad3aos
Zfand6	Fam53c	Zranb1
Rars2	H2-T10	Cyp39a1
Tpk1	Ankrd28	Gpatch11
Gm4969	Plekhg3	Mios
Selenbp1	Ptpn2	Ascc3
Ccdc34	Cpped1	B9d1
Dlec1	Kifc1	Nucb2
Phykpl	Cdc7	Crls1
Ccdc88a	Gm20521	Btbd7
1810013D15Rik	Timm9	Dennd4c
Brap	Adam17	Oxnad1
2010001A14Rik	Mylk	Zc3h11a
6820408C15Rik	Clec16a	Sirt3
Vgll1	Cklf	Ttc21b
Gm26550	Tmem108	Inpp5a
Pla2g3	Cox18	Scarb1
Foxp1	Pcm1	Ddhd2
Dram2	Rccd1	Usp13
Hsf2bp	Actr3b	Wdr37
Arrdc1	Nmnat3	Wbp1
Ergic2	Mtf2	Ndufab1
Dgat1	Glud1	Fam13b
Rnf146	Zfp954	Zfp866
Prpsap2	Med12l	Zfp651
Gmeb2	Socs5	Gm28551
Cxcl16	Sec22c	Pds5b
Gm26920	Ankrd16	Bcl2l11
Zmym4	Ube2q2	Tfdp2
C330018D20Rik	Slc25a28	Birc2
Mybl1	Dnajc5	Phc2
Ncoa7	Myo10	Tmem38a
Scaf1	Rps6ka3	Tmem205
Mapre3	Cpsf1	Gnb1l
1810043G02Rik	Alkbh7	Pxmp4
Ugt1a1	Agpat3	Emx2os
Tcte2	Pkmyt1	Rab27a
Med16	Fam120c	Zfp518b
4930481A15Rik	Gyltl1b	Col5a1
Arntl2	Nlgn3	Aifm1
Tex40	1700017B05Rik	Rasgrp3
Limk2	Fam149b	Gse1
Susd2	9430015G10Rik	Dennd6a
Kat2b	Slc35d1	Prkx
Magi1	Sun1	Iqsec2
Kitl	1500009L16Rik	Tcaf1
Snhg11	Zscan20	Pmvk
Gspt2	Trp53i11	Cyb5rl
Rprd2	Pnpla6	Prr5l
Ccser2	Cyld	Phf7
Zfp991	Gm4890	Btbd3
Hars2	AI480526	Gapdh
Dnm3	Akap17b	Eif4e2
Chchd6	Ube2h	Ift46
1810021B22Rik	Osbpl1a	Pms1
Runx2	Ube2j2	Chd7
Eif4enif1	B4galt7	Kdm6a
Rfx3	Zfp119b	Ermard
Ube2n	Kifc2	Tatdn3
Diaph1	Rbm25	Ankrd13c
Araf	Tet3	Dcp1b
Copg2	Jmjd6	Snx29
Mroh3	Cnppd1	Pafah2
Tm6sf1	Zkscan6	Pogz
Ppargc1b	Aifm1	Eno2
Sgip1	Hnrnph1	Zfp512b
Ttc41	Tube1	Pam
Snap91	Hacd4	1110017D15Rik
Pdcd10	Rbm27	Trdmt1
B230208H11Rik	Ccp110	Sidt2
Krtcap3	Carf	Efcab10
Tet3	Dpp7	Dclre1c
6430571L13Rik	Opn3	Nkiras1
Whrn	Mtx3	Zfp939
Lrrc48	Gm684	Npnt
Arap3	Gria4	Ptpdc1
RP24-122D14.3	Rbms3	Aspg
Ints2	Slc35a2	Ighmbp2
Thap2	Lrrc14	Aff2
Apoo	Anxa6	Sars2
Jak3	Hecw2	Ino80c
Zkscan7	Setx	Dus4l
Alpk1	Gmppa	Ttc41
Col16a1	Casp8ap2	Arpc5l
Kif3a	Iqce	Mtmr10
Uimc1	Gapdh	Plekhg3
Gm10658	Umad1	Aar2
Klk10	Slc22a17	Slc46a3
Mrpl33	Hax1	Uvssa
Irf9	Taf6l	Mark2
Cap2	Fam204a	Cep164
Usp45	Pcsk5	Kifc1
Trim46	Slc35b3	Nme6
Meis2	Cfap97	Azi2
Trpv4	Rasa2	Abl2
Atxn1l	Pan3	Mrps17
Ankrd13c	Mphosph9	Ring1
Lmf1	Slc9a5	Tom1l2
Whamm	Sulf1	Pbx3
Jade2	Ppp2r3a	Igsf9
Ccdc158	Fam49a	Mbtps1
Mbtd1	Slc22a21	Zranb3
Arhgap1	Cib1	Gcc2
Abhd14a	Mtmr14	Pip4k2a
1700123M08Rik	Atrx	Zhx1
Ecm1	Pnpt1	Dzip1l
2019-03-08	Tpt1	Hacl1
Phka2	Srsf4	Edrf1
Tm2d3	Dexi	Unc45a
Pgap2	Mis18bp1	Zfp85
Zfp551	Ggcx	D1Ertd622e
Klhdc10	Ube2g1	Trappc9
Vcan	Dag1	Tulp4
Pam	Osbpl6	Ing3
Casp8ap2	Rpgrip1l	Palb2
Atp6v1g2	Taf15	Uap1l1
Btbd10	Clcn6	Vps13d
Zfp688	Tex264	Phtf2
Xpo1	A2m	Rhbdf1
Mlip	Erc2	1700088E04Rik
Impdh2	Camsap3	Ncor1
Pcsk6	Klhl32	Kdm8
Ccl25	Dlg5	Gm14325
Apbb1	Farsa	Tle2
Evi5	Ppih	Tbc1d22a
Usp37	Azin2	Alkbh3
Ppp1r13l	Matn2	Phlpp2
Tenm4	Ptma	Ap5m1
Frmd7	Atg16l2	Ube3a
Hmga1	Wdr62	Adgrl3
Dnm2	Fn1	Lrrk2
Mylpf	Gsap	Hectd2
Gm29609	Ube2f	Cacna1h
Sall1	Kdm8	Gmppb
Actn2	Sidt2	Nrd1
Syncrip	Gltscr1	Kif23
Fam109a	Slc22a5	Rnf138
Dgki	Ankrd29	Gpatch2l
Txnrd1	Acox1	Prdm5
Hdac1	Gm14325	Sptan1
Tbx3	Epb41l1	Vps33b
Spaca6	Rad51c	Ppp1r12c
Fdx1l	Mylpf	2610027K06Rik
Fggy	P4ha2	Efna5
Ercc6l2	Tmem57	Caskin2
Sp4	Lyar	Swt1
Pan3	Cox19	Slc25a26
Rpain	Igflr1	Efemp1
Scamp5	Zglp1	Prdm16
Fxyd7	C87436	Gin1
Plch1	Camta2	Gyltl1b
Slc1a3	Nrcam	Pcsk5
Pigp	Slc39a3	Golm1
Arfip2	Ttll4	Slc30a5
Ehmt1	Tle2	Fars2
Zfp414	Rai1	Med7
Nfkbiz	C030037D09Rik	Dtwd1
Arhgdib	Afap1	Pex1
Mocs2	Klhl3	Arfgef2
Slc35a2	Gprin1	Hip1r
Crebrf	Rbpms2	Ube2k
Baiap2l2	Ctnna2	Med20
Sytl2	Madcam1	Adamts3
Rpp21	Gm21451	Spata2
Ighmbp2	Eif2s3y	Syk
Lrr1	Amot	Kmt2b
Gon4l	Armcx1	Tubg2
Rnf32	Zfp850	1500009L16Rik
Dip2a	Fbxo36	Slc30a9
Dmc1	Il15	Mid1
Ice1	Stard5	Aasdhppt
Kntc1	Wnk4	Golt1b
Kctd14	Micu3	Vps8
Kcnk2	Ppia	Alg9
Fam198b	Chpf2	Ptbp3
Pced1a	Eif2s3x	Dynlt1a
Lzts2	Ap4e1	Pex11g
Aasdhppt	Mrpl55	Fam120c
Neurl1a	Exoc3l	Ncapd3
Cdc14a	Mmp23	Gtpbp6
Serpinh1	Btbd3	Hps5
Slc9a8	Lbr	C2cd3
Ric8b	Ggnbp1	Heph
Gm3752	Dcun1d1	Ankrd28
Pear1	Mta3	Alkbh7
Iqsec1	Xrn1	Phtf1
Zfp202	Syt14	Wwp1
Acsl1	Ybx2	Atp9b
Mettl20	Thsd1	Inadl
Exoc3l	Tbc1d22a	C2cd2l
Peli2	T2	Pkm
Sdhc	Pstk	Pnpla6
D630003M21Rik	Tm2d3	Pkmyt1
Ttc39a	Vsir	Tyw3
Camk2d	Inip	Rabl3
Slc8a1	Med9os	Qser1
Col4a3bp	Mrps18c	Hsd3b6
Setd4	Pip4k2a	Arfgap1
Pcnp	Clcn5	Erg
Gm2762	Mis12	Nr2c1
Ska2	Celsr1	Dclk1
Tgds	Dach2	Mad2l2
Tada3	Traip	4930432K21Rik
Zfp467	Zfp746	Zkscan7
Acad10	Icmt	Wdfy2
Arhgef28	Melk	Rnls
C230004F18Rik	Nek3	Vps51
Lrrc73	Tgfbrap1	Alg3
Sema4f	Jag2	Aif1
Cenpi	Peli2	Ints2
Inadl	Ninl	Dnajc27
Gm17066	Dlgap4	Recql5
Atg2a	Angptl2	Dennd5b
Chst10	Ltbp1	Nmnat3
Wbscr27	Plekha4	Anxa6
Oplah	Fahd2a	Vill
Kcnq4	Acsl1	Commd1
Mycbp2	Acot8	Rnf14
Gk	Ssc4d	Cpsf1
Csgalnact2	Tns3	Cnppd1
Hmgcl	Ecsit	Ywhaq
Stk38l	Nr1d2	Melk
Prkdc	Dnah7b	Mtmr12
Mpp3	Gfra4	Tmem41b
Pld2	Hsd17b7	Pdlim7
Gm14399	3110053B16Rik	Opn3
Zfp874b	Khk	Fam193a
2310057M21Rik	Zfp420	Ube2j2
Sergef	Gabra4	Erlec1
Comt	Gabbr1	Srsf11
Thada	Igsf9	Gm684
Fgf5	Paxip1	Tet3
Rims1	Ntmt1	Edc3
Tmem268	Cables2	Zfp119b
Prdx6	Adgrl3	Lrch3
Ift88	Agtpbp1	Sec22c
Gm16070	2810474O19Rik	Atrnl1
Pecam1	Setd5	Narfl
Eldr	St5	Csrnp3
Synpr	Mpp3	Rltpr
Trpc3	Nup43	Rbms3
RP24-571A14.6	Traf6	Fam221a
Sp3	Lamtor3	Epb41l1
Dnmbp	Aff3	Plpp2
BC065397	Bche	0610010K14Rik
Heg1	Bves	Fxyd3
Psmd14	Chpf	Ptpn21
Fbxl3	Cdkal1	Tnfrsf14
Pqlc1	Zfp758	Osbpl5
Fam13b	R3hdm1	Smim8
Arid3a	Ndufb5	Emid1
5033428I22Rik	Usp37	Cmc2
2810408A11Rik	Cenpi	Slc39a3
Sgms1	Nktr	H2-T10
Zfp672	1700088E04Rik	Tor1aip2
Crocc	Il4ra	Zfp1
Fancd2	Myl6	Pih1d2
Trub2	Abcc1	Map3k10
Trim12a	Atxn2	Aasdh
Osbpl10	Fam208b	Phka2
Kif24	Mdn1	Pttg1ip
Melk	Zc3h10	Mcoln1
Zfp867	Gmpr	Ypel3
Tbxas1	Socs7	B4galt5
Gm10785	Ikbkg	Camsap3
Aff3	Zfp740	Anpep
Tubgcp6	Dock9	Armcx1
Cbs	Smarcad1	Fhl1
Gm9801	Hnrnpa1	Cipc
Trit1	Nek1	Cfap97
Mvb12a	Mpp6	Ccnl1
Ppp4r1l-ps	Ybx3	Ttc17
Zbtb37	Bag6	Birc6
Enpp3	Mllt1	Mdn1
Crim1	Ehmt2	Ift81
Hdac7	Kif20b	Gm13212
Sh3d21	Yap1	Ltbp1
Senp5	Sbf1	Proser3
Rsad1	Chek2	Arl13b
Nars2	Rapgef6	Mta3
Man2b2	Papola	Srsf4
Pphln1	Ssbp3	2410089E03Rik
Gm5860	Ccser2	Fastkd2
Dip2b	Stx2	Cdk10
AI480526	Taf8	Mcph1
Plppr2	Fam21	Mynn
Stag1	Rbm5	Firre
Wipf3	Atp6v1h	Neurl1a
Ubl4a	Huwe1	9230110C19Rik
Stx11	Far1	2810408A11Rik
Slc22a21	Clasp2	Trappc2
Dap3	Ppp1r12a	Inip
Gstm6	Slc4a7	Astn1
Cd200	Nasp	Pcmtd1
1110017D15Rik	Ric8a	Map3k12
Lpin2	Trappc13	8030462N17Rik
D030068K23Rik	Lsr	Abcg2
Clcn5	Trmt11	Zglp1
Tcp11l1	Plec	Slc25a16
Disp1	Myo6	Trpm4
D330041H03Rik	Clk1	Ube2s
Zgrf1	Mapk15	Zfp874b
Josd2	G2e3	P4ha2
Zscan22	Irf2	Mdm1
Rbm34	Hnrnpa2b1	Eme1
1810058I24Rik	Senp1	Gm13187
4933431K23Rik	Ttc5	Rnf214
Fbxo47	Nav2	Itgb3bp
Cpa5	Dnm3	Cald1
4930523C07Rik	Lhx6	2810474O19Rik
Prrt2	Ttc39b	Cyb5r4
Sec16b	Atp2c1	Rap1gap
Cpa2	U2af1	Mcm9
2610203C20Rik	Egfl7	Slc4a7
Paox	Aldh16a1	Wnk4
Mbtps2	Casd1	Ccdc125
Nr1d2	Mgat1	Denr
Ccnyl1	Plekha6	Orai3
Anapc15	Dtx2	Ccdc127
Tert	Msl3	Fbxo36
Rhbdf2	Srpx	Stard5
Ube2d-ps	Arhgap39	Rps6ka3
Smpd5	Rrm2b	Dyrk1a
Foxn2	Polh	Zfp560
Lacc1	Fut10	Tubgcp4
2019-09-11	Abl1	Boc
Plxnb1	Kcnj15	Slc2a4
Phactr2	Nckap5l	Pknox2
RP23-114B10.6	Meis2	Fndc3b
Zfp287	Med15	Micu3
Zfp949	Capg	Whsc1l1
Gm21811	Apobec1	Thap6
Fancm	Tmem143	Ankhd1
Gm4924	Neto2	Stim1
Prpf39	Lpgat1	2810403D21Rik
Tti1	Ermap	Sema4c
Prrg1	BC034090	Rbm27
Ankrd16	TINCR	Rpain
Dmpk	Nnat	Taz
Alkbh1	Dock6	Suz12
Ppp1r1a	Zbtb18	Fahd2a
Dnmt3c-ps	Nol4	Stk36
Snx13	Nckap5	Ybx2
BB218582	Slc39a2	Strn3
Zfp950	Lpcat2	Ept1
Gm3667	Magi3	B3gntl1
Ubxn11	1110019D14Rik	Klhl3
Tnc	Ppil2	Tsku
Zfp326	Bnipl	Srcap
Adgrl3	Tex30	Xrn1
Cables1	Rsph9	Mlh3
Pitpnb	Plgrkt	Wnk1
Ttc14	Zfp668	Taf15
Atp2a1	Lhfpl1	Celsr1
Sema6a	Thnsl2	Cd40
Zscan18	Pdp1	Cntrl
Abcg5	Cadm2	N4bp1
Dzank1	Col13a1	Slc25a28
Ywhae	Ptk2b	Hnrnpa3
Stk19	Dennd1c	Pigq
Arid5a	Tial1	Ddb2
Lnpk1	Lactb	Dph7
Trpm4	Cacna1c	Rras2
Gm8206	Fam73a	Jag2
Adamts9	Sema4f	Cdk5rap2
Mapk15	Il3ra	Ndufb5
Agbl5	Mrps35	Mdga1
Tgfbr1	Sorbs2	Tspan4
Ttll3	Tmem168	Tpm3
Trim41	Adora1	Crtc3
Pnkp	Mtmr4	Acad10
Cdhr4	Trim33	C330018D20Rik
Kdm5a	Ldb2	Ndrg2
Sfi1	Nfib	Awat2
Btbd19	AA986860	Trmt112
Smarcad1	Arhgef12	Stk38l
Hnrnpl	Pex5l	Tube1
Zmynd12	Arhgap27	Glt1d1
Kdm6a	Dus4l	Wdr73
Zfp995	4930452B06Rik	Foxj3
Tmem173	Tmem255a	Atxn7l1
Zc3h3	Cyp4f13	Cyb561a3
Sec31a	Rcor3	Rab40c
Plekha5	Lace1	Gfra4
Gm21451	Gm13219	Slc35f5
Agap3	Ccdc150	Azin2
Zfp946	Npcd	Primpol
BC006965	Ccdc80	Paip2
Ogfod2	Lrp12	Dohh
2019-03-02	Cecr5	Ccdc82
Ago3	Zfp972	Stxbp3
Il15	Zfp783	Hnrnph1
Grip1	Uimc1	Rrp36
Gm29096	Fam234a	Zfp687
Rbm6	Ctps2	Zfp125
Zfp229	Rftn2	Dnajc4
Btrc	Kcp	Gtpbp8
Usp29	Rabl6	Chn1
Tpd52l2	Ldlrad4	Ldah
Tm2d1	Noxo1	Anks6
Zdbf2	Dnajc25	Mettl25
Diaph2	Tbx3os1	Lzts2
Fam83g	Ric8b	Vps37a
Espn	Slc4a11	Tgds
Ube2e2	C230035I16Rik	Ppp3cc
Ccna1	Kirrel3	Ylpm1
Gria2	Aebp2	Ganab
A230056P14Rik	4833439L19Rik	Zfand6
Ppip5k1	Lcp1	Wdr20
Prmt9	Prss8	Rpgrip1l
Fam45a	AU022252	Myo10
Pot1a	Marveld2	Hmcn1
Nav3	Adal	Pbld2
Bnipl	2310030G06Rik	Zmym3
Daglb	Ptdss2	Tcfl5
Gm20683	Dffb	Ralyl
Gmpr2	Naa16	M1ap
Apobec1	Arap1	Gm20683
Glmp	Drp2	Dram2
RP23-235J18.1	Slco5a1	Tmem168
Mettl22	Chrd	Cep112
Adprm	Fastkd2	Socs2
Gdpd3	Pknox1	Eml2
Tmem220	Slain1	Rev1
Fam229b	Tmem40	Tbl1xr1
Arfip1	Ppp1r3b	Golga1
Dennd6b	Gm16835	Adora1
Dclk2	Ikzf4	Mzf1
Anpep	Sema6c	Trp53bp1
Cers5	Psd3	Atp6v1c1
Slc8a2	Scn3a	Ube2g1
Ss18	Gulo	Gpcpd1
Rnf115	Ap5s1	Ganc
Dsc2	Ccdc97	Rasip1
Erc2	Rps6ka5	Galnt13
Src	Pdzd4	Ptpro
Npepl1	Efcab10	Rcor3
Hjurp	Socs2	Alg6
Alg9	Ehmt1	Sys1
Ambra1	Traf2	Ccdc186
Kcnt2	Cyb561d1	Prkcb
Ltbp3	Nap1l4	Lcor
Gal3st4	Prtg	Srpk2
Zfp873	Alpk1	Cacna1a
Fut8	Abcg5	Drp2
Pbx4	Ccnc	Mdfic
Lmln	Uggt2	Epha5
Zfp111	Sytl1	Megf6
RP23-389N20.2	Bod1l	Nsun6
Mtif2	Lgals8	Ppfia2
Exd1	Bcas1	Nxpe2
Kcnc3	Prdx6	Man2c1
Ccdc62	Dgki	F8
Mylk	Phf21b	Fam69c
Ndufa4	Lgr6	Mthfsl
Xylb	Cbx5	Plod2
Ddx11	Rpl10a	St3gal6
Mtss1	Acox3	Wdr59
Cep44	Ppp1r26	Adgre5
Zfp322a	Fnip2	Sh3bp4
Zfp574	Pak3	Snhg11
Sltm	Zkscan2	Ttc39b
Gm13563	Prrg1	Nsfl1c
Tpm3	Zzz3	Mbtd1
Smad2	Dlec1	Eif2s2
Kat6b	Ptbp3	Prtg
Tdp2	Flnc	Dnajc25
Sh2d5	Arap2	Mrps18c
Susd1	Atg2a	Ccdc36
Neil2	Pde1c	Cpa2
Slc39a2	Cux2	Elavl4
Aph1a	Zscan26	Srpx2
Ppp1r12b	Rnf31	Dnaaf5
Sp8	Lrrc49	4933430I17Rik
Ankrd12	Usp54	Kif17
Timm23	Phyhd1	Rrm2b
Erlin2	Cul9	2610316D01Rik
Cdc25c	Zfp2	Ptger3
Gtpbp8	Kcnab2	Dgki
Rab11fip5	Abca4	Zfp185
Zfp120	Adamtsl1	Sox10
1700016H13Rik	Ss18	Mib2
Hspa14	Alkbh1	Gm28175
Stpg1	Notum	Kazald1
Gm4724	Golga1	Dkkl1
Ptk2b	Kif3a	Cobl
Prpf40b	Pemt	Clip1
Il17re	2610021A01Rik	Cfap69
Fgd2	Fam71e1	5330434G04Rik
Akap17b	Tacc1	Tmem55b
Zbtb43	Gtf2i	Dyx1c1
Adat1	Fam118b	Mgat5
Samd12	Wasf3	Zzz3
Cr1l	Ythdf3	Ccdc157
Ttbk2	Surf4	Tyr
Pax6	Zfp551	Mlycd
Slc16a7	Elavl4	Tmtc4
Zfp449	Tenm4	Zfp420
Gm9530	Aif1	Acox1
Pctp	Rnasel	Usp21
Spata7	Lrp8os2	Tmem40
Nrxn1	Zfp930	Zfp947
Il4ra	Map3k14	Adamts7
Rab10os	Cpne5	Tlcd2
Ppp2r3a	Bhlhb9	Itpa
Fam227a	Zfp385b	Scamp4
Zfr2	Tex40	Tm2d1
Dexi	Nme5	Sdhb
Tyk2	Tab3	Ap1s3
Syt7	Rnf138	Rev3l
Coasy	Gm8281	Six3os1
Spice1	Kcnh2	Kansl1
Pabpc1l	Dclre1c	Klhl32
Gas7	Zfp704	Cd5
Rorc	Smg6	RP23-316L10.2
Tbc1d23	Gm20422	Il1f5
Speg	Col11a2	BC003331
[truncated: 1,039 more rows]

## Sheet: shared and unique SE genes
age only genes	age and layer genes	age, layer and prom genes	age and prom genes	layer only genes	layer and prom genes	prom only genes
Mark2	Dock9	Vps39	Map6	Cttn	Macf1	Sh3bgrl
Ctnnd1	Ctnnd1	Vav2	Mef2d	Atp11c	Clstn1	Tacc2
Mpzl1	Arhgef12	Gpr137	Bin1	Fnbp1	Fam126a	Nfasc
Cask	Lsm14b	1500004A13Rik	Dock7	Pxdn	2019-09-06	Zbtb18
Arvcf	Ssbp3	Eml4	Phldb1	BC037034	Enah	Gm45234
Mllt4	Ptprf	Lef1	Pla2g6	Mllt4	Myo5a	AW554918
Ppip5k2	Immt	Map3k4	Afap1	Arhgef11	Robo1	Ptprt
Ttc13	Mtcl1	Map3k7	Ank2	Fkbp7	Susd1	Wdr45
Kifc3	Myo1b	Nasp	Ppfia3	Phldb1	Ccdc136	Yme1l1
Luc7l	Add3	Foxm1	Fndc3c1	Gas5	Ube2k	Il1rl2
Pogz	Lsr	Fgfr1	Cadps	Ocrl	B9d1	C2cd5
Zfp207	Arhgef40	Ctnnd1	Prrc2b	Erbin	Tmem164	Ttll9
Parp6	Smpd4	Pcnt	Tra2b	Map4k4	Sfxn2	Kifc3
Apba1	Csnk1g3	Lrrfip2	4933431E20Rik	Etl4	Scube1	Tmem63b
Pex5	Tead1	Scarb1	Nav2	Smg7	Gfra2	Zfp644
Fndc3c1	Ehmt2	Lsm14b	Ank3	Daam1	Fnbp1	Fam169b
Rnps1	Esrp1	Tpd52	Golga4	Magi2	Arfip1	Efcab5
Wdfy3	Ybx3	Tnik	Ubr4	Flna	Map3k10	Cpeb2
Nme6	Mdm1	Mpzl1	Cpeb4	Pigv	Rnf219	Igdcc4
Zmynd11	Clasp2	Parp6	Synj1	1110017D15Rik	Senp7	Tmem38b
Rsrc2	Clasp1	Csnk1d	Cd44	Tmprss6	Pqlc2	Pgbd1
Atxn2	Arhgef10l	Epb41	Rab12	Zc3h18	Oma1	Usp3
Isca2	Rai14	Arhgap17	Madd	Ssbp2	Slc25a26	Ext2
Uspl1	Anks1	Pbx1	Plekha6	Pank2	Dock7	Atp5d
Tctex1d2	Clstn1	Myo1b	Fnbp1	Ccdc66	Dusp12	Cd44
Mcrs1	Taf8	Bin1	P2ry2	Clip1	Gm17066	Ilf3
Ppfia1	Eml4	Dctn1	Ttc3	Shq1	Wdr78	Klf8
Fam135a	Scube3	Git2	Amn1	Palm3	Ift46	Osbpl1a
Ubp1	Nav2	Gnas	Akap9	Tnfrsf22	Pld2	Magi2
Ildr2	Hnrnpa3	Numb	Tsc22d2	Dst	AW554918	Setx
Commd10	Spire1	Golim4	Kctd17	L3mbtl3	Ncam1	Adgrb2
Robo2	Fn1	Slk	AW554918	Accs	Ccdc171	Sox2ot
Crtc2	Pard3	Itga6	Pcgf2	Nfkb1	Fbrsl1	Capsl
Wdpcp	R3hdm2	Numa1	Phf8	Gba	Rpain	Nol4
Ncor2	Ktn1	Lmo7	Bcas1	Bcas3	Kdm4c	Mrps10
Stk33	Prom1	Usp4	Trmt112	B230311B06Rik	Fgfr1op2	Kcnma1
Vkorc1l1	Thap3	Cadm1	Zfp275	Luc7l2	Stox1	Csf1
Kcnip2	Hnrnpa1	Scrib	B230312C02Rik	5730455P16Rik	Gnb1l	Ccdc150
Gpatch2l	Tnk2	Tmem87b	Meg3	Syngap1	Nin	Rccd1
Arid4b	Osbpl3	Mta1	Pik3cb	Prr14l	Dctn1	Phf20l1
Fam60a	Wsb1	Tead1	Cep112	Pbrm1	Arntl2	Invs
Gpbp1	Tecr	Nfya	Mttp	Zranb1	Syngap1	Gm8281
Ciz1	Baz2b	Slain2	Gm44206	Fdxr	Slc9a8	Plekhm2
Pip5k1c	Dst	Ect2	Nhsl2	Tpd52	Airn	Zfp711
Osbpl8	Tlk2	Ank2	Urb1	Awat2	Prrg2	Ccs
Ehbp1	Socs7	Trappc13	Slc7a10	Suco	Ssbp4	Cep44
Zc3h14	Kansl1	Syne2	A730017C20Rik	Kif21a	Tmem68	Plekha2
Tfap2a	Wnk2	Fryl	Map3k12	2610301B20Rik	Dclk1	Tars2
Dtx3	Prrc2c	Auts2	Acnat1	Pot1b	Speg	Urgcp
Nbeal1	Limch1	Sorbs2	Atl1	Syt9	Tia1	Rgs14
Brwd3	Map7d1	Tmem44	Eif2ak4	Mmgt2	Tmem241	Jmjd1c
Tle1	Fgfr2	Sorbs1	Dnaaf3	Eme2	Kcna6	Slc35c2
9430038I01Rik	St3gal3	Col2a1	Lcor	Rarg	Postn	Synrg
Parpbp	Actg1	Apbb2	Srsf6	Madd	Birc6	Ppp1r12b
4933431E20Rik	Immp1l	Plod2	Atpaf1	Glb1l	Fam193b	D930020B18Rik
Pkd1	Ralgps2	Map2	Rffl	Eif2ak4	Tfdp2	Zfp106
Csnk2a1	Sec31b	Depdc5	Cacnb1	Brca1	Myzap	Miat
Tarbp2	Arhgap12	Kalrn	Rps6ka5	4930432K21Rik	Cbx3	Acbd4
Nap1l4	Ubqln1	Aim1l	Map2	Ranbp17	2610020H08Rik	Zfp455
Htt	Picalm	Depdc1a	Ccnc	Pikfyve	Dvl1	Rims2
Nrxn2	Sema3f	Clk4	Poln	Stap2	Dock4	Rhbdl1
Trim26	Mapkap1	Fmnl2	Rhbdl1	Aste1	Rnf32	Rnft2
Syt8	Akap9	Bbx	Tpcn2	Cyb5r4	Zfp384	Tecr
Nckap5	Nr6a1os	Synrg	Dnajb6	Rabep2	AC149090.1	Rfx2
Emc10	Adgrg6	Dst	Mas1	Hpn	Arsk	Trpv6
Plag1	Parp11	Flnb	Pappa	Cobll1	Cacna1h	Tex26
Ncoa6	Brd8	Mpdz	Zfp708	Rad9b	Arfgap1	Bend4
Fbxo34	Crtc3	Hnrnpk	Zkscan8	Psma3	Dnase1l1	Aifm3
Celf3	Slain1	Eml2	Mgat4a	Fzd6	Ddhd1	Sez6l2
Nemp2	Ythdf3	Tcf7l2	Syne4	Mapkapk3	Zfp558	Ern1
Tlk1	Tmed5	Zcchc2	Mzf1	Col16a1	Dot1l	Pgap2
Gtf3c2	Lrsam1	Atp6v1h	Fam221a	Fstl5	Gm20517	Fnip2
Tmem176b	Uggt1	Hnrnpa3	Hmgn5	Tmem119	Smarca2	Sfxn2
Zfp106	TINCR	Kif1a	Gprasp1	Mrps18b	Cmc2	Slc38a10
Nsun3	Tial1	Atp6v0a1	Srcap	Mtg2	Sfi1	Zfp62
Esrp1	Plec	Mapt	Nsmf	Fbxw11	Zfp827	2410124H12Rik
Acin1	Stx2	1700088E04Rik	5031425E22Rik	Epb41l4b	Ube3a	Acaa1b
Synj2	Slc38a10	Wnk1	Rgl3	Arhgap18	Iqsec1	Def8
Cyp4f16	Pstk	Cyfip1	CH25-588N10.2	Nme6	Prdm16	Zfp862-ps
Zfp945	Atg13	Synj2	Ahcy	Zfp521	Timm23	Dusp12
Rpl17	Mmgt2	Fam65b	Tmem25	Dnajc1	Zfp263	Aftph
Slc29a1	Paqr5	Fgfr3	Gnl3l	Sema6a	Dennd6b	Sec22a
Huwe1	Hpf1	Rab11fip3	Slc25a40	Bptf	Ckmt1	Setdb2
Ywhaq	Myo9b	Acaca	Gabra4	Depdc1a	Synrg	Mapkap1
Smc6	Macc1	Clta	Gpr83	Mtmr3	Cdpf1	B130024G19Rik
Elavl2	Ccnc	Meaf6	Gm16973	Srpk2	Mgat5b	Iqce
Sdccag8	Kank1	Gltscr1	Ptpn13	Zfp217	Dyrk1a	4930447C04Rik
Sbno1	Sort1	Dab1	Sec16a	Fam175a	Slc25a53	Pqlc1
Mtch2	Guf1	Phactr4	Gnpda1	Ythdf2	Fam188a	Cdhr4
Rabep1	Kcnh2	Nf2	Slc25a35	Josd2	8430429K09Rik	Crnde
Tarbp1	Rpl13	Dtx2	Lsm5	Zfp65	Pif1	Prmt9
Uxs1	Lpgat1	Sft2d1	Fam149b	Cdan1	Zfp711	Disp1
Tmub2	Caprin2	Ccdc142os	Ccdc28a	Gm14322	Tex2	Nol12
Trpc1	Cds1	Pex2	Cldn34c1	Vopp1	Cadm1	Aak1
Itfg2	Mtf2	Lpin1	Zfp286	2610027K06Rik	Ggta1	Csn3
Rapgef1	Iqce	Lrp8	Mad2l2	Fggy	Ppp1r9a	Pum1
Cd44	Sdccag8	Cracr2b	Dusp12	Pecam1	Echdc2	Exosc7
Igsf1	Kynu	Cacna2d1	Mtg2	Osbpl11	Flot2	Tmcc1
4833439L19Rik	Epb41	Erc1	Slc35e1	Hemk1	Surf1	Zfp280d
Six3os1	Zfp280d	Kif1b	2610301B20Rik	Apmap	Spata2	Gabpb1
Pde7a	Pdp1	Plekha1	Pum1	Amn1	Tfb2m	Ube4a
Spata1	Ddr1	Tnip1	Srd5a3	Bin1	Ttc21b	Ube2d2a
Mcph1	Cnot2	Pbrm1	Haus2	4930522L14Rik	Fhl1	Col27a1
Zfp617	Setdb2	Cep152	Plagl1	Mipol1	Mettl25	Ago4
Adamts6	Mapt	Bcl11b	Morf4l1	Trit1	Tdp2	4933407K13Rik
Idh1	Miip	Herc6	Gm28285	Cbarp	Erlec1	Slc25a14
Klhl14	Slc38a6	Cpt1b	Zbtb49	Dcbld1	Mcph1	Slc8a2
Msantd3	Slc4a7	Mfge8	Fam71e1	Ccdc157	Sgms1	Gm28557
Rims2	Arhgap27	Ccdc126	Smim8	Vamp7	Scmh1	Dhx33
Cish	St7	Gabbr1	Sox17	Gm27177	Carm1	Eef1d
Kat7	Sun1	Ddr1	Asic4	Focad	Psma3	Dnajc1
H2afy	Eml5	Mapk8ip3	Eme2	Zbtb34	Arhgap9	Tbcel
Slc25a53	AA986860	Inpp4a	Erc1	Scoc	U2af1l4	Pigb
Btf3l4	Zmym5	Cdc7	Idh1	Prc1	5031425E22Rik	Phldb2
Gad1	Ap2m1	Zfp839	Tbp	Gng12	Foxj3	Rnf150
4930522L14Rik	Mttp	Suco	Gm973	Sdk2	Lrsam1	Gpr19
Far1	Psd3	Icosl	Mdm4	Zfp346	Paip2	Slc7a7
Nfasc	Rhot1	Enthd2	Ubap2l	Ube2d-ps	Atat1	Ttc3
Mtf2	Exosc1	Epb41l3	4930432K21Rik	Crnde	Hectd2	Zcrb1
Tatdn3	Snx19	Dock7	Me2	Ezh2	Bcas3	Fap
Itgb3bp	Ttc3	Epb41l2	Def8	Zfp961	Ccdc163	Khk
Stox2	Srpx	Rapgef2	Ikzf1	Mff	Racgap1	Faim
Carf	Ntan1	3110053B16Rik	Ssc4d	Pex1	Myh14	Smpdl3b
Elavl4	Foxk2	Ptprd	Mthfsl	4932438A13Rik	Elmod3	Bex1
Xpo6	Amn1	Etl4	Slmap	Blvra	Mettl6	Ccdc173
Cuedc2	Trnau1ap	Dnajc8	Bcas3	Kyat1	Lyrm1	Neil1
Suv39h2	Mina	Sbf2	Spats2l	Tbp	Ubxn11	Tnrc6b
Osgepl1	Bin1	Cask	Fbxl12	Dmpk	Naga	Sri
Lypd6b	Pknox1	Dcun1d4	Xpo6	Emc8	Pkig	Csgalnact2
Fam192a	Hacd4	Dab2	Etv6	Whsc1	Pbx3	N4bp2l2
Zfp568	Tenm2	Napb	Mdn1	Raet1e	Txlng	Gdpd5
Preb	Oma1	Wdpcp	Unc45a	Dnajc16	Cdk10	Rpl14
Arhgap12	Rpl10	Tmem8	Zfp12	Rai14	Ccdc127	Pvt1
Luzp1	Crnde	Akap9	Fam118b	Pde2a	Hmgxb3	Ptk2
Sorbs2	Ccdc150	Hnrnpa2b1	Adam22	Suv420h1	Parp6	Epb41l3
Ttc28	Lef1	Wnk2	Eif4g3	Kansl1	Inpp4b	Lmbr1
Chka	Rrp36	Anxa9	Raph1	9430091E24Rik	Rims1	Ppa2
Mdm4	Myo6	Itga10	Ints7	4930427A07Rik	Mbnl1	Dhodh
Stx8	Nup210l	Cul1	Ccdc191	Pkig	Tmem80	Arfip1
Clasp1	Zbtb49	Ndel1	Tbc1d22b	Slx4ip	1700123M08Rik	Rptor
Adgrb2	Zfp276	Pld3	Tmem164	Asxl1	Vegfa	Lcp1
Met	Tbc1d13	Arhgap39	Mpc1	Rnf14	Fgfr2	Pomgnt1
Mpv17	N6amt1	Kyat1	Ube2l3	C530008M17Rik	Epb41l3	Mtch2
Fance	Epb41l3	Cacna1d	Dyrk2	Trnau1ap	Sap18	Zfp668
Cep170	Dennd3	Slx4	Slc30a6	Meis3	Ttll5	Adgrg3
Rad54b	Ppp1r9a	Gm20521	Psma3	Tmem218	Gmfg	Mrpl33
Trnau1ap	Smarca2	Clasp1	Ankzf1	Heph	Lime1	Ctla2b
Lrrc14	Ip6k2	Tpt1	Mcm9	Slc12a6	Rbm41	Osbpl6
Ccdc88b	Plekhb1	Zfp523	Itch	Stil	Dennd1a	Tom1
Gpr19	Syt14	Zfp644	Zfp788	Vrk1	Rcsd1	Fbxw11
Fat3	Mpv17	Sobp	Wdr4	Gm29609	Nipa2	Slc26a11
Msrb3	Ddhd1	Kirrel3	Tmem175	Frrs1	Ppp1cc	Vangl1
Nnt	Scamp4	Nap1l4	Bnc2	Sik3	Dleu2	Zdhhc1
Cpeb2	Nckap5	Rragb	Epn2	Zfp950	Msantd2	Slc9b2
Marveld2	A730017C20Rik	Ppp4r2	Rev3l	Hnrnpl	Prkag2	2700062C07Rik
U2surp	Bod1l	Nrcam	Golga2	Mib2	Msantd1	Mtmr1
Rnf14	Inpp4a	Nav1	Dhtkd1	Slc7a10	Ppox	Ggcx
Gm28285	Zfp821	Gm42906	Kcne3	Zkscan1	Emsy	Sfi1
Slc12a9	Nt5c3	Exoc1	Egfl8	Sun2	Cstf2	Grip1
Otud7b	Slc2a4rg-ps	Lhfpl1	Ppm1h	Rps6kb1	Phf20	Rspo2
Gm14418	Dpp7	Mettl9	Ruvbl2	Rnf32	Mga	Mipol1
Nadsyn1	Smox	5930412G12Rik	Hesx1	Ep400	Ebf3	Mettl5
Zfp961	Khk	Col25a1	Adgrl1	Fance	Ccdc15	2310035C23Rik
Bicd1	Rnf130	Nutf2	Syk	Dbt	Rnf38	4930452B06Rik
Tub	Pex5l	Rell2	Zfp2	Maf	4930480K23Rik	RP24-77E13.10
Mettl24	Sh3pxd2a	Abhd1	Dnajc1	Trim68	Aak1	Dennd1a
Bach2	Dcun1d1	Psma3	Zfp609	Wnk2	Atp11a	Epn2
Crem	Fam21	Emid1	Ptges3	Nectin3	Plxna3	Tmem143
Ralgapa2	Camta1	P2rx4	Arntl	Evi5l	Sobp	Fam204a
Casc4	Myef2	Cux2	Anapc13	Dennd5b	Cfp	Kcne3
Zfp862-ps	Zzz3	Ankrd29	Foxd2os	Eif4g3	Gm14418	Col13a1
Rprd1b	Lrp8os2	Adam15	Sec14l2	Cald1	Pla2r1	Ccdc136
Sema6c	Dnmt3b	Ppp3cb	Mrpl27	Abi1	Helq	Zkscan1
Ccdc157	Tm7sf2	Cyp4f13	Katnal2	Nbeal1	Zfand4	Fbf1
Slit2	Ythdf2	Tmem168	Cpxm2	Slc38a10	Ptprs	Pnldc1
Igsf9	Pank2	Zfp532	Ccdc136	Atp2b4	Bcor	Iqck
Miip	Sharpin	Cda	Dcbld1	Slc37a3	Nup210l	Cacna1d
Zmynd15	Dlg4	Trpc1	Scml2	Zfp280d	Sec24a	Rtn4
Rcbtb1	Slc26a11	Myo18a	Slc22a17	Gstk1	Ankrd27	Fign
Gls	Gnpda1	4833439L19Rik	Ap3m1	Snx13	Zfp638	Xpa
Psma3	Fam118b	Gprasp1	E130307A14Rik	Sh3d21	Atf7ip	Dhx30
1110034G24Rik	Klhl26	Phf20	Dtwd1	Ttc3	Tcte2	Slc29a3
Clcn4	2610021A01Rik	6430548M08Rik	Tufm	Cipc	Ptpn4	Ndrg3
Smyd4	Irgm1	Foxk2	Nphp1	Tnip1	Hacd2	Ist1
Stxbp5	Asxl3	Zfp668	Gin1	Adgre5	Commd1	Dhcr7
Pabpc4	Ppcdc	Arhgap29	Mapkap1	Baz2b	Msi2	Aph1a
Crlf3	Etl4	Fam49b	Cep63	Trps1	Chpt1	Gng12
Hdgfrp3	Ccp110	Ptbp3	Cacna1d	4930503L19Rik	Pcdh7	2019-03-08
Psmf1	Lrrc49	Dhx30	Zfp451	Mirg	Tpcn2	Intu
Smurf2	Mtm1	Zfp1	Mrps17	Cage1	Sh3bp4	Zfp991
Usp1	Mtmr14	Ttll10	Spata6	Usp48	Mppe1	Ttc6
Map2k7	Cuta	Bicc1	Mfsd8	Btbd11	H2-Q7	Raet1e
2410004B18Rik	Zfp961	Ano1	Cdkl3	Arhgap17	Mettl16	Zfp788
Zfp454	Dot1l	Tmem127	Gphn	Naga	Stard8	Gm3604
H2-T22	Prr14l	Rgl1	Fam173b	Flot2	Letm2	Zbtb49
Gprasp1	Cacna1a	RP23-218K15.5	Dip2c	Eif4enif1	Agap3	Cdk8
Zfp516	Plekha6	2610316D01Rik	Spa17	Srsf11	Slmap	Bbof1
Rpl27a	Trip4	H2-T10	Pknox2	Tpcn2	Ercc6l2	Scn3a
Zfp638	Wasf3	Srpk2	Dlc1	Tmem80	Slc9b2	Gm973
Slc18b1	Rock2	Fnbp4	Med7	Clcn7	Hdac4	Gm11827
Gpsm1	Rpl10a	Tlk2	Vps51	Emsy	Ppip5k2	Dtwd2
Gsn	Kif20b	Ccdc39	Mxra7	Gin1	Mok	4933431E20Rik
Szrd1	Gm1673	Zfp827	Zcrb1	Rusc1	4921504A21Rik	Nmi
Cdc14b	Mllt1	Fsd1l	Ryr1	Dcaf6	Tvp23a	Myo15
Setd3	Bag6	Frmd4a	Rccd1	Uty	Enox2	Rapsn
Tmem241	Acly	Zc3h7a	Fam193b	Zfp219	BC065397	Dolpp1
Wdr25	Papola	Syngr4	Klhl18	Sytl2	Smim10l1	Cacna2d3
Lrriq1	Rpl18	Rps6kc1	Auts2	Atp2a3	Lins1	Gm16070
Ppfia4	Usp1	Sncaip	Postn	Rad52	St6galnac6	Serp2
4933430I17Rik	Rer1	Tex264	Ank1	Atp9b	Fbxl18	Iffo1
Gm20498	Nnat	Slc38a6	Fendrr	Fbxl18	Mllt10	Wdfy3
Gabpb2	Atf2	Wnt10b	Rad52	Piezo1	Traf3	Ccdc85a
Abhd5	Mipol1	Kidins220	Trappc2	Gatb	Lemd3	6430531B16Rik
4933408B17Rik	Atxn2	Slc35g1	Pantr1	Zfp507	Zfp865	Maml2
Spata5	Scly	Rfx2	Cyb561a3	Abcd4	Abcd4	Mpdu1
Eps15l1	Zfp362	Stim1	Tmed8	A830080D01Rik	Zfp862-ps	Pibf1
Atrx	B3gnt5	Gm3164	Ten1	Gm10406	Zbed5	Ehmt1
Phtf1	Mtmr2	Kcnab2	Blvra	Akap11	Vill	Ube2q2
B3galnt2	Strn3	Apba2	Bbx	Pdgfrb	Greb1	Fancc
Stap2	Mcrs1	Trip4	Mllt10	Tanc2	Itpr1	Hs6st2
Ddx3y	Polg	Trim25	Kdm5c	Tmem139	Zfp532	Fam185a
Ktn1	Adnp	Nup35	B3gntl1	Pde7a	Raph1	Tacc1
Kmt5a	Fam53a	Fam161a	2810474O19Rik	Acap3	Ppp1r16a	Srcin1
Ccdc61	Asna1	Gmip	Tubg2	Sema4d	Snap91	Gm3512
Lrrc27	Psmg4	Osr2	I830077J02Rik	Msi2	G630016G05Rik	Syt8
Rnf170	Senp1	Mapkapk3	9230110C19Rik	Lmcd1	Sgf29	Pdzd2
Pum2	Sema4c	Stag3	Smad7	Surf1	Rnf214	Gorasp2
Zfp384	Mink1	Tex9	Scmh1	Nadk2	Plpp2	Ttll5
Tsr3	Blm	Fnip2	Hhat	Wiz	Tsku	Ablim3
Grin1	2810403D21Rik	Emsy	Med15	Slc25a14	Cyp39a1	Tsga10
Scube1	Sptan1	Adar	Rapgef1	Cd40	2019-03-08	D430036J16Rik
Extl3	Gstz1	Pcdh19	2610020H08Rik	Stk19-ps1	Chmp2a	Rbm6
U2af1	Cdc42bpa	Ndor1	Tab2	Rapgef1	Gng8	Hsd3b7
Tac1	Orc1	Pou6f1	Osbpl1a	Zfp28	Megf6	Neb
Opa1	Usf2	Mbd4	Cdk19	Gm11837	2610027K06Rik	Yipf2
Rcor3	Zranb1	Capg	Ddx58	Dnm1	Zfp512b	Tsc22d1
Rpl27	Rbm10	Fam184a	Glb1l	Spata17	Axl	Pisd-ps2
Ap2b1	Klhl17	Bcas3	Armcx1	Stag3	Tcf12	Ypel4
Prdm5	Trp53i11	Napg	Slc36a4	Ralgps1	Morf4l1	Adgra3
Styx	Chek2	Glb1l2	Fam162b	Rif1	Ncor1	Zfp607b
Nab2	Rad54l	Gm20517	Mak	2610005L07Rik	Bicd1	Tbx3os1
Glis2	Eif4a2	Gnmt	Zfp638	Radil	Fars2	Sox17
Zfand4	Layn	Foxo3	Proser3	Prss36	Apol7d	Hlx
Htra2	Med14	Nexn	Senp6	2610020H08Rik	Slc6a17	Zfp516
Cux2	Sugp2	Taf15	Setd2	Kif24	Efcab12	BC006965
Zranb1	Rbck1	Cbx3	Tdrd7	5033428I22Rik	Cyp7b1	Kif15
Ybey	Reps1	Katnal2	Elmo2	Kctd20	Pogk	Pcdh11x
Whsc1	Gm20422	Magi3	9930021J03Rik	Rbfox2	Slc38a6	Lat
Azin2	Bptf	Hs1bp3	Anks6	Nek4	Atp5sl	Epn1
Prrx1	2019-09-10	Nudt21	Zfp239	Wdr78	Sh3tc2	Kif1b
Neil1	Eme2	Haus3	Ube2s	Dhx30	Fbxo34	Pank2
Asxl2	Ttc5	Klhl18	Fgfr3	Zfp426	Dtwd2	Lrsam1
Pfkfb3	Adal	R3hdm1	Srcin1	Khdrbs3	Prss36	Faxc
Chmp3	2610301B20Rik	5530601H04Rik	Tgif2	Ikzf2	Pogz	Itfg2
Ptpn4	Mbnl2	Eif3j1	Oas1c	Nmi	Vps33b	Ankrd24
Tom1	5530601H04Rik	D930015E06Rik	Zscan25	Mycbp2	Zranb3	C230035I16Rik
Tle2	Osbpl9	Aim2	Tfb2m	Camk2g	Adamts9	Dmxl2
Mapkapk5	Rasl12	Kifc2	Glb1	Lypd6b	Magohb	Cnot2
Fip1l1	Arid3c	Tec	Firre	Dnah1	Tmem234	Bin1
3830406C13Rik	Dnm1l	Unc93b1	Ctsa	Ccdc136	Rad52	Dctn1
Mum1l1	Rai1	Tuft1	Adamts17	Zfp68	Slc25a16	Slc1a4
Znrf1	Arnt	Bhlhb9	Hexdc	Mok	Serac1	Slmap
Ylpm1	Ptprs	Eme1	Ccdc114	Rreb1	Mir99ahg	Tanc1
Rian	Gm11837	Cyp2d22	Pisd-ps1	Clock	Agbl2	Prss36
Esco1	Relb	Slc35d2	Whsc1	Pdlim7	Swt1	Pcsk2os1
Bbx	Ppp2r2d	Mamdc4	Gpr87	Col25a1	Sipa1l1	Lyrm1
Ppcdc	Meg3	Dnajb4	Fam185a	Kmt2e	Ubn2	Zkscan6
Ggta1	Cacna1b	Scn8a	Tecr	Stxbp5	Edem2	Bbs9
Drp2	Nek1	Ddhd1	A830052D11Rik	Eaf2	Tom1l2	Fbxo6
Uggt2	D2hgdh	Ube2i	Camsap1	Zdhhc3	Ghdc	Zfp532
Mrps10	Fbxo34	Zscan29	RP23-431O7.9	Exog	Igf1	Cadps2
Eif4g3	Dab1	Fbxo9	Tecrl	Sgce	Necab2	Kat2b
Hnrnph2	Ccdc66	Gkap1	Nr2f6	Cspp1	Plagl1	Ago3
Ccdc163	Zfp454	Prss36	Tpk1	Syt7	Aamdc	Ankrd65
Slc37a3	Clcn4	Zfp286	Selenbp1	Polr3gl	Serinc2	Snap91
Hscb	Zfp972	Lrrc16a	Ccdc34	Upf3b	Fras1	Etnk2
Lats2	Mmab	Dnase1l1	Ttc6	Slc2a8	Stxbp3	Scube1
Enox2	Gnb1l	Fopnl	Slc25a53	Col4a5	Inpp5e	Sspo
Pam16	Thnsl2	Foxd2os	Arrdc1	Stradb	D1Ertd622e	Cep295
Zcchc9	Crlf1	Pank2	Gm26920	Sra1	Dnal1	Hmgn5
Fam160a2	Asphd2	Rps6kb1	C330018D20Rik	Wdr59	Lin52	Dcun1d2
Nfic	Aak1	Bcl2l12	Zbtb18	Taz	Kif16b	Tmem234
Sft2d2	Psma3	Armc2	Kat2b	Herc2	Tbcel	Rnf207
5530601H04Rik	Cbfb	Fam35a	Zfp991	Acsl6	Lrrfip1	Gpr160
Atxn2l	Fut10	Pafah2	Ccdc163	Spata2	Cetn4	Ip6k2
Glb1l	Ccdc80	Nt5dc1	Eif4enif1	Ist1	Efemp1	Pan3
Hnrnpk	Sirpa	Usp13	Diaph1	Efemp1	Plekhg3	Dennd1b
E130114P18Rik	Gm16576	Gtf3c4	Ppargc1b	Aasdh	Galc	Tmem44
Lemd3	Ano1	Rassf1	Snap91	Lipo3	Clec16a	Tyms
Stmn1	Pitpnm2	Ctbs	Pdcd10	Cep126	Luc7l2	Gm11744
Pum1	Islr2	Rps27	Rell2	Ercc6	Cox18	Foxn2
Gm28042	Cep57l1	D3Ertd751e	Zdhhc1	2310035C23Rik	Rccd1	Morn1
Ccdc25	Calml4	Ranbp17	Ints2	Rpap1	Ccdc57	Pisd-ps1
Mutyh	Fam60a	Rcbtb1	Klk10	Cadm3	Bcl2l12	Lemd1
Mapkapk3	Trmt11	Gm11110	Mrpl33	Crem	Alkbh7	Fut2
Rfwd2	Fam53c	Arhgef40	Atxn1l	Fam71f2	Fam120c	Map4k1
Matr3	Erbin	Fbxw11	Lmf1	Pigx	Tsc22d2	Naaladl1
Gtf2a2	Fam73a	Dennd4c	Neil1	Tpp1	1500009L16Rik	Phactr2
Mpdz	Ankrd24	Ntf3	Emsy	Map2k4	B4galt7	Lax1
Tspan32	Magi2	Tars2	Sft2d1	Unc5b	Zfp961	Suv420h1
Itgb8	Mark3	Zfand4	Casp8ap2	Ppp6r3	Rbm25	Slc2a8
Kctd20	Rnf38	Abca4	Zfp688	Cenpc1	Pex1	Zscan22
Tfb2m	Abi1	2310035C23Rik	Mlip	Sorbs1	Tube1	Elmod3
Gtf2i	Sin3a	Tctn1	Meis2	Upp1	Rbm27	Atg4c
Lmbr1	Deaf1	Irf2	Ercc6l2	Os9	Mtx3	Mki67
Cyb5rl	Atg16l2	Dusp12	Arfip2	Pla2g6	Setx	Lrp11
Rnf135	Smg6	Mtg2	Invs	Ggps1	BC029214	Wdr17
Bmf	Kif21a	AW554918	Slc35d2	Nhej1	Iqce	Tsr3
Stmn4	Ccdc134	Pcgf2	Rnf32	Atf2	Gapdh	Casp8ap2
Sarnp	Eif5a	Efcab10	D630003M21Rik	Zfp276	Mphosph9	Wnk2
Garnl3	Sgsm2	Rpusd3	Gm2762	Atp8b3	Wnk2	Fance
Vps8	Tex30	Hacl1	4833439L19Rik	Fancd2	Mycbp2	C530008M17Rik
Ap5s1	Slc46a1	2700049A03Rik	Tgds	Map7d2	Abtb1	Adamts10
Nphp1	Invs	Tdrp	Pgap2	Pogk	Clcn2	Med15
Tor1aip2	Bcl2l12	Whsc1	Whrn	Zfp433	Rpgrip1l	Plekha8
Mecp2	Pck2	Epn2	Comt	Haghl	2010001A14Rik	Asphd2
Prss36	Ap5s1	Gm44973	Fgf5	Uhrf2	Klhl32	Zranb1
Dleu2	Rfwd2	Ltn1	Eml2	Kat5	Dlg5	Nucb2
Ctsa	Asxl2	Kif23	2810408A11Rik	Cep78	Azin2	Crls1
Kmt2c	Arhgef9	Dclre1c	Zfp672	Pum2	Matn2	Comt
Thsd1	Fgf13	Atm	Osbpl10	Zfp639	Ptma	Btbd7
Ccnd3	Sh2b3	Fbrsl1	Mbd5	Acin1	Atg16l2	Sirt3
Ermard	Mboat2	Dgka	Klhl26	Stra13	Ppp4r1l-ps	Wdr37
Cep63	Epc2	Cttn	Aim1l	Txnrd2	Gsap	Oxnad1
Nrf1	Firre	Ager	Gm5860	Prkx	Slc22a5	Wbp1
Egln1	Map3k14	Rusc2	Dip2b	Wbscr27	Tmem57	Zfp651
Abi3	Rapgefl1	Rnls	Dap3	Ccdc186	Zglp1	Bcl2l11
Fastkd2	Ubap2l	Gulo	Gstm6	Wdr91	Slc39a3	Tfdp2
Mphosph9	Senp6	Megf6	Cd200	Trafd1	Hfm1	Birc2
Park7	Emsy	Hps5	Tle1	Prdm10	Klhl3	Smim10l1
Ypel1	Map4	Gpank1	4930523C07Rik	Ppp6r2	Aasdh	Rab27a
Yipf1	Stxbp5	Mbd5	Fam188a	Tead1	Gprin1	Col5a1
Irf5	Crem	D430042O09Rik	Tpt1	Npnt	Thap6	Herc6
Kansl1l	Sdccag3	Carnmt1	Rhbdf2	Rragb	Zfp850	Dennd6a
Pcnx	Sncaip	Hmcn1	2019-09-11	Phkb	Zbtb37	Prkx
Gabpb1	Dock7	Crem	Zfp949	Pms2	Btbd3	Zdbf2
Dtnb	Prkcz	Fbxo34	Cnot2	Cyb5rl	Xrn1	Pmvk
Fam53a	Gripap1	Vstm2b	Ppp1r1a	Ipo11	Atp9b	Gapdh
Gm14403	Rhbdd3	Pih1d2	Crnde	Pde4dip	Fam149b	Eif4e2
Usp5	Coq2	Ept1	Cables1	Tmem41b	Kctd17	Gse1
Sik2	Ninl	Dpep1	Zscan18	Gabpb1	Ltbp1	Pam
Med23	Slc4a1ap	Hdac9	Nsun3	Zfp688	Mrps17	Trdmt1
Slc43a2	Shq1	Prr3	Agbl5	Tbl1xr1	E130307A14Rik	Lins1
Nup35	Trim33	Ptger3	Plekha5	Crispld1	Zcchc2	Npnt
Hsdl2	Cklf	Galc	Uxs1	Nat6	Adgrl3	Ighmbp2
Plekhj1	Iscu	Zbtb18	BC006965	Fxyd3	Lamtor3	9930021J03Rik
Fam188a	Sh2b1	Tmem234	Rfwd2	Aamdc	Zfp758	Ino80c
Col13a1	Txndc11	Baiap2	Il15	2610035D17Rik	Ndufb5	Mtmr10
Gas5	Dnm1	Ggta1	Grip1	Ncor1	Prkdc	Slc46a3
Fam208b	Nol4	Gpr180	Gm29096	Ube2d2a	Ppp3cc	Sergef
Banp	Srp19	Gpr155	Zdbf2	Fbxo34	Lhx6	Ring1
Dlst	Dnajc4	Armcx1	Diaph2	Usp15	Ttc39b	Mbtps1
Neurl4	Egfl7	Gm4890	Ube2e2	Lrrfip1	Aldh16a1	Pip4k2a
Porcn	Dock6	Sdccag3	Ccna1	Pigq	Nckap5l	Dus4l
Aim2	2610020H08Rik	Nsfl1c	A230056P14Rik	Ccnt1	Ermap	Abtb1
Ints10	Pnpla7	Tex2	Nup210l	Klhl18	Lpcat2	Ing3
Ppp3cc	Tk2	Hmgb2	Dlst	Wdsub1	Mrps35	Vps13d
Wiz	Tmem143	Hps3	Elavl2	Zfp518a	Adora1	Phtf2
Mllt10	Thap6	Tmem164	Dsc2	Zgrf1	4930452B06Rik	Rhbdf1
Pkig	4930503L19Rik	N4bp1	Msrb3	Ptpn2	Ctps2	Ncor1
Zdhhc1	Usp40	Kpna2	Erc2	Cpped1	Ldlrad4	Tle2
Eri3	Pnldc1	Zfp931	Src	Timm9	C230035I16Rik	Alkbh3
Zdhhc3	Hemk1	Gabpb1	Npepl1	Zfp939	Drp2	Dnase1l1
Ist1	Rnasel	Aak1	Fam229b	Aprt	Scn3a	Ap5m1
Ctage5	H2-Q7	Arpc5l	Pbx4	Tcf7l2	Rps6ka5	Gmppb
Zfp952	Fbf1	Fbxo10	D3Ertd751e	Mtf2	Socs2	Gpatch2l
Fam134c	C130026L21Rik	Focad	RP23-389N20.2	Glud1	Zc3h11a	Ppp1r12c
Wnk2	Pdgfd	Slc35e1	Exd1	Zfp954	Ppp1r26	Caskin2
Urgcp	Mgat1	B130024G19Rik	D330041H03Rik	Hfm1	Nfib	Gyltl1b
Kif27	Hmgxb4	Tcaf1	Mtss1	Ube2q2	Fbxw7	Golm1
Hmgxb4	Rundc3b	Pnkd	Zfp574	Myo10	Elavl4	Slc30a5
Mms19	Arhgef19	Mia3	Gm13563	Mrpl48	Pde7a	Med20
Ptov1	Ccdc163	Lrrk2	Kat6b	Gyltl1b	Rnf138	Phc3
Rbpms	Uap1	Tmem40	Usf2	1700017B05Rik	Gm8281	Kmt2b
G3bp2	Zfp644	Phlpp2	Susd1	9430015G10Rik	Gm18190	Gin1
Aup1	Mirg	Dguok	Aph1a	Slc35d1	Ift81	Golt1b
Rgs22	Slmap	Nudt6	Sp8	Cyld	Tnrc6c	Ncapd3
Akap8	Ikzf4	Sema6c	Nlgn3	Ube2h	0610037L13Rik	Dleu2
Zfyve26	D11Wsu47e	Specc1	Crim1	Depdc5	Tacc2	C2cd3
Gm16835	Gtf2ird1	Edc3	Cdc25c	Usp29	Irf2	Mllt10
Ttc6	Slc25a40	2810403D21Rik	Rab11fip5	Ccp110	Nat6	Rc3h2
Alg6	Ocel1	Slc39a14	Slc16a7	Clcn2	Casd1	Rabl3
Zbed4	Slc9a5	Mknk1	Nrxn1	Cnot2	Gxylt2	Nr2c1
Ccdc173	Arhgef6	Epb41l1	Zfp644	Adam15	Zfp202	Alg3
Ssx2ip	Prepl	Pald1	Fam227a	Sp4	Ap1s3	Pkig
Lig1	Fam136a	Brms1l	Rbpms	Lrrc14	Pdzd4	Dnajc27
Kif23	Ppig	Sdr39u1	Tyk2	Gmppa	Acss3	Recql5
Fam149b	Atp2c1	Gfra4	Rorc	Casp8ap2	Zfp182	Gpr180
Kcnk16	Kifc3	Eri2	Lsm7	Umad1	Bche	D430042O09Rik
Bbs9	4833418N02Rik	Naa16	Tom1	Fam204a	Dcst2	Pdlim7
Ciart	Cog7	Zdhhc20	Oscp1	Slc35b3	Zfp125	Txlng
Cep78	Myo7a	Edrf1	Ggta1	Rasa2	Crebl2	Atrnl1
Ssh2	Keap1	Tbc1d22b	Slc39a11	Sulf1	Garnl3	0610010K14Rik
Gm16867	Morf4l1	Zfp788	Gm7173	Fam49a	Nfatc2	Fxyd3
Scoc	Zc3h10	Rin3	Zbtb37	Cib1	Ncor2	Osbpl5
Sult5a1	Nemp2	Rad9b	Mgat5	Pnpt1	Tenm4	Prkcz
Mrpl55	Pcsk4	Pja2	Aar2	Tmem38a	Sorbs2	Phka2
Tead1	Tle2	Dnal1	Smg6	Zfp454	4930402H24Rik	Pttg1ip
Csnk1g1	Rps6ka5	Adamts3	Ppt1	Apol7d	2010315B03Rik	Paxip1
Pi4kb	D030028A08Rik	Egf	Phf20l1	Dag1	2410002F23Rik	Ypel3
9030622O22Rik	Tacc2	Wdfy2	Rcor3	Plagl1	Wdr91	B4galt5
Cpne1	Adgrl1	Cep350	Gm44619	Lins1	Dram2	Mrps17
Tnrc6c	Esco1	Mef2d	Dnah2	Prdm5	Il3ra	Ccnl1
Faxc	Stil	Arhgap12	Ndor1	Farsa	Mdfic	Glb1l
Catsperd	Igsf3	Mrpl48	Zfp317	Ppih	Sipa1	Arl13b
Tmem164	Hfm1	Luc7l2	2019-09-04	Stag1	Triobp	2410089E03Rik
Slc43a1	Lrp12	Vps13b	Mios	Wdr62	Porcn	Fastkd2
Paqr5	Rin2	Gm28042	Sema6d	Fn1	Zmym1	Mynn
Rbm26	Rars2	Pramef8	Gm28042	Dcp1b	Ovgp1	Dhtkd1
Rttn	Ccdc88a	Lrrfip1	Aff2	Adamts9	Rasip1	Astn1
Card14	Auts2	Inip	Top3b	Osbpl9	Kif17	Zfp874b
Csad	1810013D15Rik	Cfap69	Recql5	Ube2f	Man2c1	Mtmr12
Zfand6	Tom1	Brpf3	Ankrd13c	Gnas	Diaph2	Slc35e1
Mid1	Mark2	Pkm	Dnm1	Ankrd29	Tbc1d2	Slc38a6
Ptpn13	Ergic2	Zfp956	Slc2a4	Rad51c	Nphp4	Ccdc125
Dlec1	Ccdc157	Tle1	Ankrd29	Lyar	Kpna2	Orai3
Vgll1	Zmym4	Scml2	Nxpe2	Cox19	Sox10	BC065397
Morf4l1	Scaf1	Cbfa2t2	Iffo1	Ttll4	Eif2s3x	Tubgcp4
Gm26550	Ugt1a1	Pemt	Tmem38a	Ctnna2	Fam196b	Boc
Pla2g3	Tex40	Gnb1	St6galnac6	Amot	Pate2	Fndc3b
Dram2	Magi1	Ikbkb	Kmt2e	Dync2h1	Rltpr	Ankhd1
Hsf2bp	Kitl	Zfp862-ps	Alg3	Trpc1	Eno2	2810403D21Rik
Dgat1	Ccser2	Cherp	Rasgrp3	Zfp865	Urgcp	Taz
Rnf146	Clk4	BC029214	Appl1	Mrpl55	Nsmf	Suz12
Prpsap2	1810021B22Rik	Inf2	Dzip1l	Exoc3l	Arl13b	Stk36
Cxcl16	Runx2	Plpp7	Zfp85	Kctd17	Rnf170	Ddb2
Tcte2	Copg2	Nlgn3	Crtc2	Ggnbp1	6430573F11Rik	Dph7
Arntl2	Gabbr1	Syne1	Hbs1l	Gripap1	Rtel1	Rras2
Limk2	Alg6	Lins1	Tnfrsf14	Thsd1	4932441J04Rik	Tspan4
Zfp644	Snhg11	Wwp1	Tmem41b	Cbfa2t2	Cables2	Crtc3
Hars2	6430571L13Rik	Exoc6b	Vps13b	Agbl5	Cbarp	Stk38l
H2-Q7	Whrn	Myo9a	Zfp384	N4bp1	BB218582	Glt1d1
Chchd6	Lrrc48	Arhgap4	Gabpb1	Vsir	Topors	Wdr73
Rfx3	Alpk1	Slc22a5	Cacna1c	Med9os	Fam229b	Atxn7l1
Mroh3	Col16a1	Clcn7	Pif1	Pip4k2a	Cadps2	Echdc2
Tet3	Kif3a	Ppp1cc	Mettl8	D3Ertd751e	Ankrd24	Slc35f5
Lrp8os2	Cap2	Cklf	Mtmr12	Mis12	Scamp4	Nasp
Arap3	Phf3	Bptf	Pms1	Dach2	Sdccag3	Primpol
Tex40	Ccdc158	Golgb1	Ccdc66	Zfp746	Fam92a	Kctd18
Thap2	Arhgap1	Cd82	6430573F11Rik	Icmt	Clk4	Numb
Apoo	Abhd14a	Mid1	Tpst2	Nek3	Endov	Dohh
Uimc1	Zfp551	Ppcdc	Ccm2	Tgfbrap1	Setd5	Rrp36
Irf9	Klhdc10	Prr5l	Phtf1	Mphosph9	Nr2c2	Gtpbp8
Usp45	Atp6v1g2	Ftx	Zfp142	Ninl	Pnck	Chn1
Trim46	Impdh2	Rad52	Atp9b	Angptl2	Tpk1	Ldah
Meis2	Evi5	Syngap1	Ap4e1	Plekha4	Spata7	Vps37a
Whamm	Usp37	Rpe	Phf7	Ecsit	Foxn2	Ylpm1
Ftx	Tenm4	Neil1	Lrch3	Zfp420	Trp53bp1	Clcn2
Jade2	Frmd7	Dctd	Slc4a7	Gabra4	Tctn1	Myo10
Ccdc66	Sall1	Ydjc	Pot1a	Auts2	Phc3	Pbld2
Lrrc16a	Pih1d2	Espl1	Zfand6	Ntmt1	Denr	Mfsd8
Mbtd1	Syncrip	Cep128	Pvt1	Rusc2	Pdzd2	Zmym3
Cacna1a	Txnrd1	Adam17	Nkiras1	Setd5	Nhsl2	RP23-414P13.3
Gmip	Spaca6	Tsku	Dmpk	St5	Pla2g6	M1ap
Araf	Rpain	Tpd52l1	Zfp532	Nup43	Optc	Airn
Pgap2	Mocs2	Uspl1	Glt1d1	Traf6	Eif2s2	Tbl1xr1
Pam	Mcph1	E130307A14Rik	Camsap3	Bche	Gm26782	Atp6v1c1
Btbd10	Zfp839	Bnc2	Rnf138	Bves	Plcb4	Galnt13
Xpo1	Rnf170	Mllt10	Heph	Chpf	Itgb3bp	Alg6
2610020H08Rik	9230110C19Rik	Lrrc17	Map4k5	Cdkal1	Rbm12b2	Timm23
Pcsk6	Dcun1d4	Zfp870	Gtpbp8	Rcbtb1	Capn15	Sys1
Apbb1	Lrp8	Fbxw7	Gtpbp6	Nktr	Cntrl	Nsun6
Slx4	Dip2a	Ddx58	Trpm4	Myl6	Rffl	Il3ra
Ppp1r13l	Kctd14	Dynlt1a	Hectd2	St6galnac6	Cacnb1	Fam69c
Zfp551	Pced1a	Aftph	8030462N17Rik	Fam208b	Adamtsl1	Wdr59
Hmga1	Serpinh1	Igsf9	Gpatch4	Gmpr	1700010I14Rik	Adgre5
Gm29609	Slc37a3	Hsd3b6	Aif1	E130307A14Rik	Pan3	Ccdc138
Ptprs	Iqsec1	Abtb1	Wdr20	Scml2	Prdm2	4933430I17Rik
Fam109a	Whsc1	Erg	Gon4l	Mpp6	Epn2	Aim2
Zzz3	Tsku	Ift52	Smim10l1	Lsm14b	Hgfac	Crebrf
Hdac1	Slc8a1	Bcl11a	Csf2ra	Dennd4c	Sema4c	Exoc6b
Smim8	Tada3	Tipin	Hnrnpf	Rapgef6	Sapcd1	Gm28175
Tbx3	Sema4f	Tia1	Zfp618	Dennd1a	Nipal2	5330434G04Rik
Fdx1l	Cenpi	Camsap3	Hpse2	Huwe1	Irf7	Dyx1c1
Map4	Gm17066	Carf	Rnf111	Far1	Slc1a6	Tyr
Immp1l	Rev3l	Strn3	Spsb4	Sec31a	Kcnk2	Emsy
Arhgef40	Gk	Dixdc1	Ttc17	Ppp1r12a	Pkn3	Mlycd
Ehmt1	Mpp3	Mus81	Ccdc138	Trmt11	Tmem161a	Elavl2
Zfp414	Pld2	Ganab	Myo19	Clk1	Colgalt2	Ccdc157
Nfkbiz	Sbf2	Rc3h2	Myrf	Ccser2	Mpg	Pcmtd1
Rpp21	Nlgn3	Dcp1b	Ptpn21	Arhgef40	Hps3	Sdhb
Ighmbp2	Prdx6	Cep57l1	Cd40	Egfl7	Me1	Six3os1
Gon4l	Ift88	Eci2	Ankrd16	Casd1	Map4	RP23-316L10.2
Dmc1	Gm16070	Arfgef2	Fhod3	Plekha6	Gm28496	Il1f5
Iqce	Pecam1	Adcyap1r1	Cdk5rap2	Msl3	Rsph10b	Gm9866
Pla2g6	Psmd14	Dync2h1	Rab40c	Abl1	Timm21	Eva1c
Cdc14a	Crocc	Ipmk	Ccdc186	Sgip1	Rad54b	Adamts18
Slc9a8	Fancd2	Slit3	Cept1	Akap9	Zfp609	Pcdh1
Pear1	Trim12a	Hemk1	Josd2	Kcnj15	Adgre5	Csgalnact1
R3hdm1	Nudt21	Zfp560	Clcn7	Meis2	Kdm4b	Cdc14b
Zfp202	Tmem40	Tecr	Adamts7	Med15	Cpne1	Trim9
Col4a3bp	Slc25a53	C330007P06Rik	Prpsap2	BC034090	Pgf	Crem
Pcnp	Tbxas1	Ccdc159	Mbp	Nnat	Pnkp	Psma3
Dennd5b	Camk2d	2610301B20Rik	Map4k1	Wnk1	Zfp346	Atp5h
Sec22c	Nhsl2	Kars	Kansl1	Nckap5	Zfp687	Dclk1
Zfp467	Hdac7	Ccdc191	Cdon	1110019D14Rik	Kcnu1	1110004F10Rik
Arhgef28	Col25a1	Gm13212	Stmn4	Plgrkt	Asb1	Ninl
C230004F18Rik	Fgfr3	Narfl	Rbm25	Tom1	Usp13	Lats1
Slc38a10	Senp5	Rbm33	Foxn2	Cadm2	Proca1	Gnb1l
Wbscr27	Rsad1	Pcgf1	Gm10516	Col13a1	Acvr1	Herc2
Oplah	Nars2	Usp10	Ywhaq	Dennd1c	Tmem192	Col25a1
Csgalnact2	Lemd3	Cetn4	Timm10b	Tmem168	4930447C04Rik	Fbrs
Stk38l	AI480526	Iqsec2	Rap1gap	Rprd2	Awat2	Ifi44
Gm14399	Stag1	Plxna3	Kcnu1	Mtmr4	Ninl	Arhgef16
Rims1	Clcn5	Fam172a	Itpa	Ldb2	1700001L05Rik	Alg9
Tmem268	Disp1	Slc30a9	Ptpro	Nfib	Zzz3	Plpp3
Synpr	C330007P06Rik	Fignl1	Fgfrl1	Pex5l	Ica1l	Zfp426
RP24-571A14.6	Zgrf1	St6galnac6	Zfpm2	Tmem255a	Ptbp3	U2af1l4
Sp3	Zscan22	Ccdc127	Eva1c	Lace1	Mlycd	1600020E01Rik
Heg1	Fbrsl1	Fam21	Mta2	Gm13219	Ythdc2	Sema6c
Pqlc1	Zc3h14	Stil	Ccar2	Tlk2	Pitx2	Fbxl5
Fam13b	Rbm34	Dnajc4	Iqce	C330021F23Rik	Eef2k	Proca1
5033428I22Rik	Cpa5	Vps8	Tnc	Npcd	Atp2b4	Sgk3
Sgms1	Cpa2	Aspg	Epha5	Erg	Iqcg	Oas1c
Runx2	Pear1	Atg16l1	Iqcb1	Uimc1	Dhx30	Ube3a
Kif24	Paox	Nuak1	Tcf7l2	Fam234a	Gm11457	Pkd1
Zfp867	Nr1d2	Phf3	Stat4	Rftn2	Atf7ip2	Tdrd9
Gm10785	Tert	Sec22c	Lyar	Kcp	Elmo3	Cpsf4l
Ap3m1	Zfand6	Slx4ip	Fam169b	Aebp2	Stard10	Sik2
Tubgcp6	Fancm	Kctd18	Inadl	Lcp1	Asph	Gpatch2
Enpp3	Tti1	Dennd5b	Zfp408	Chpf2	Pik3c2g	Actr3b
Sh3d21	Ankrd16	Notch2	Whsc1l1	Prss8	Fam122b	Nrp2
Pphln1	Wdr78	Mtx2	Lemd3	AU022252	Rpe	Arnt2
Plppr2	Dnmt3c-ps	2900076A07Rik	Crlf2	Marveld2	Ccdc17	Terb1
Ubl4a	BB218582	Exosc1	Gm14403	2310030G06Rik	Cobl	Isy1
Slc22a21	Zfp950	Wdr78	Gm21814	Ptdss2	Zfp426	Preb
Tmem143	Ubxn11	Pcsk4	Chadl	Arap1	2610316D01Rik	Dgkq
Lpin2	Adgrl3	Dnajb6	Eaf2	Chrd	Xpnpep3	Cd6
D030068K23Rik	Sema6a	Dlg1	B130024G19Rik	Fastkd2	Zc3h3	Zfr2
Tcp11l1	Mapk15	Clcn2	Zfp248	Ppp1r3b	Ehmt1	Fam161a
D330041H03Rik	Sfi1	Wnk3	Bbof1	Pdzd4	Mlh3	Prune2
1810058I24Rik	Btbd19	Dus4l	Aasdhppt	Ehmt1		Tspan17
4933431K23Rik	Smarcad1	Gtf2h2	Spopl	Traf2		Nckipsd
Amn1	Csnk1d	2010315B03Rik	Spata13	Prrc2c		Tdp2
Fbxo47	Tmem173	Aprt	Eml5	5031425E22Rik		Armc8
Rsad1	Sec31a	Cdk12	Usp10	Tle1		Ttc25
Ythdf3	Tcaf1	Birc6	Rad9b	Acaca		Glb1l2
Mbtps2	Gm21451	Rnf14	Phf3	Uggt2		Sipa1l1
Ccnyl1	Ago3	Elk4	Tspan17	Sytl1		Rcbtb1
Phf3	Rbm6	Lcorl	Rab7	Bcas1		Arfip2
Anapc15	Zfp229	H13	Senp8	Sema4f		Rara
Smpd5	Fam188a	RP23-414P13.3	Fbxo34	2010001A14Rik		Haus2
Foxn2	Tpd52l2	Ccdc82	H2afy	Acox3		Socs7
Plxnb1	Zfp384	Pkd1	Gm44276	Pak3		Hsdl2
Phactr2	Espn	Sik3	Erg	Zkscan2		Ccdc88a
Pank2	Gria2	Zfp217	Gnat2	Prrg1		Gm14410
BC065397	Pot1a	Fam193a	Atxn7l2	Dlec1		Caprin1
Ptges3	Apobec1	Tmem260	Lmo7	Flnc		Zbtb8os
Prpf39	Adprm	Emx2os	Smyd4	Arap2		Zfp94
Prrg1	Tmem220	Rrm2b	Gm26902	Zfp644		Polr3c
Cacna1c	Rnf32	Gclm	Foxp1	Rnf31		Tgds
Alkbh1	Gfra4	Mtrr	Prkcz	Spata6		Bpnt1
Fam185a	Hjurp	Suv420h1	Mapk12	Usp54		Stac3
Gm3667	Ambra1	Cacna1c	Wdr25	Cul9		Eri3
Lsm5	Mylk	Pcmtd1	Carf	Zfp2		Eml2
Zfp326	Ndufa4	Ppfia4	Smoc2	Mef2d		Ube2h
Ttc14	Tdp2	Fhl1	Trpc6	Alkbh1		Phf20
Tacc2	Slc39a2	Setd3	Stxbp2	Phactr2		Rbks
Atp2a1	Glb1l2	Tvp23a	Oxnad1	Zhx1		Ecm1
Spaca6	Ankrd12	Cep164	Trmt2a	Fam71e1		Klhl21
Abtb1	Gtpbp8	Meis3	Gbp9	Tacc1		Ermap
Exoc3l	C330018D20Rik	Tyw1	Ebi3	Arhgef9		Hectd2
Ywhae	Adat1	Cyb5r4	Popdc2	Gtf2i		Snx13
Napg	Samd12	Myzap	Lrif1	Surf4		Ppfibp1
Stk19	Cr1l	Gm26648	Saa1	Zfp551		Ppp4r1l-ps
Arid5a	Prpf40b	Ppp3cc	Tatdn3	Fgfr1		Slc44a2
Nup210l	Zfp449	Spaca1	Crtac1	Carf		Ralgapb
Lnpk1	Pctp	Mdga1	Inpp4b	Cables2		6430573F11Rik
Tgfbr1	Spata7	C330021F23Rik	Tor1aip2	Aif1		Ucma
Trim41	Ccdc136	Uap1	Spns2	Arhgef12		Fgfr2
Kdm5a	Zfp2	Mark2	Ctso	Cpne5		Mir99ahg
Sft2d1	Il4ra	Eif2a	Pms2	B130024G19Rik		Mfsd10
Mrpl33	Nsun3	Slc9b2	Sfmbt1	Tex40		Fam188b
Hnrnpl	Dexi	Prdm9	Rlf	Nme5		Slc4a1ap
Zmynd12	Coasy	Mprip	Nrg1	Tab3		Syt14
Kdm6a	Pabpc1l	Dnmt3b	Lrrfip1	Strn3		Rps6kb1
Adal	Tbc1d23	4933407K13Rik	Tnnt1	Zfp704		Stk35
Med15	Erc2	Lipg	Myl1	Col11a2		Fahd2a
Zfp946	Traip	Zfp354c	Chmp3	Aup1		Col6a3
2019-03-02	Cyb561d1	Dgkd	Ppfia2	Atat1		Zfp951
Btrc	Madcam1	Ccdc103	Helz2	Vps29		Nadsyn1
Ppip5k1	Slc25a16	Csnk2a1	Usp21	Gab1		Mdm4
Prmt9	Wnk4	Tm9sf4	Trp53bp1	Srl		Tnrc6a
Fam45a	Mga	Triobp	Rps6kb1	Zmynd12		Cbfa2t2
Nav3	Zfp688	Myo19	Prdm9	Nav2		Pms1
Daglb	Vdac3	Kif27	Wdr59	Scarb1		Hdac5
Glmp	Jak3	Cdkl3	Mboat2	Ccdc64		Ttc5
Mettl22	Srrm1	Cep55	Ccdc150	Rnaset2b		Stag1
Myo19	Prpf39	Nufip2	Rbsn	Atp2c1		Rbms3
Gdpd3	Uros	Atp5g2	Tbc1d13	Bzrap1		Rps6kc1
Tpd52	Wiz	H2afy	BC003331	Rbm4		Dhx35
Lsr	C2cd3	Cln6	Ggt5	Tmpo		Slc16a2
Dennd6b	Mical3	Fam71e1	Gpcpd1	Cacna1c		Lmf1
Cers5	Zfp369	Glis3	Cd5	Whrn		Tmem80
Slc8a2	Ube3a	Tmem108	Slc25a26	Tnk2		Adamtsl2
Rnf115	Mmp23	Slc25a43	Ptbp3	Ankrd24		Rhbdd2
Fam184a	Jmjd1c	Flot2	Phka1	Pard3		Sorbs2
Kcnt2	Zscan26	Mbnl1	5730480H06Rik	Hbs1l		Hdac6
Cfap69	Setd3	Tcaf2	Foxl2os	Rbms1		Tbc1d19
Ltbp3	Mrpl48	Ttc3	Alg6	Il3ra		Brox
Gal3st4	Qrich1	Osbpl1a	2810403D21Rik	Ly6h		Fbrsl1
Zfp873	Ccdc74a	Pvt1	Eif4a1	Epb41l3		Cttnbp2
Fut8	Bcas3	Pkp4	Ganc	Mllt10		Stat2
Lmln	4933431E20Rik	Eno1	Atp5l	Mum1l1		Ppp1cb
Zfp111	Lmo7	Ablim3	Prrt1	Bspry		Gm16008
Adprm	Zbtb8os	Prdm5	Lrp11	Igsf9		Mfsd2b
Cep44	Rsph9	Mroh1	Glis1	Mettl10		Sae1
Zfp322a	6330408A02Rik	Hbs1l	Srpx2	Catsperd		Mphosph9
Smad2	Taf6l	Ccdc114	Atg2a	Bnipl		Cacna1c
Dlg1	Olfm1	Abcd4	Slc4a11	R3hdm2		Mamdc4
Ccdc62	Eefsec	Tmem241	Rab34	Shank3		Prdm16
Ppp1r12b	Slx4ip	Fbxl18	Ifi44	Fam53a		Atrx
Zfp120	Ppp4r1l-ps	2610020H08Rik	Lins1	Ccdc39		Nars2
1700016H13Rik	Tmem41b	Socs7	BC026585	Pqlc1		Arpc1a
Stpg1	Ercc6	Gm4969	Mbtd1	Lta4h		Abcg8
Ptk2b	Dnajc5	Phykpl	Il3ra	Igsf9b		Rnf115
Prpf40b	St6galnac6	Brap	Usp6nl	Alg14		9530077C05Rik
Il17re	Zfp444	2010001A14Rik	Kazald1	Hivep2		Rttn
Zbtb43	Usp34	6820408C15Rik	4930503L19Rik	Tlr5		St7l
Ttbk2	Cacna1c	Foxp1	Ovgp1	Plekhh2		St3gal3
Pax6	Pcm1	Gmeb2	Paox	Gm7173		Pi16
Gm9530	Fam214b	Pnpla7	Srgap3	Tyw3		Tbc1d14
Myef2	Ppip5k1	Mybl1	Tmem55b	Rnf135		Mthfs
Pstk	Depdc5	Ncoa7	Rph3al	Rps6ka3		Enkd1
Ttll10	Ankrd13b	Mapre3	Tcfl5	Chn1		2610020H08Rik
Hspa14	Cage1	1810043G02Rik	Porcn	Ankzf1		Jmjd7
Rab10os	Tcf7l2	Med16	Gmpr2	Zfp558		B3glct
Zfr2	Arhgap33	4930481A15Rik	Ncald	Ebf3		RP23-235J18.1
Syt7	Sh3d21	Susd2	Sipa1l1	Ccdc17		Srfbp1
Spice1	Aida	Snhg11	Rhbdl3	Smg1		Gm42878
Gas7	1110017D15Rik	Gspt2	BB218582	Zdhhc16		Kptn
Speg	Syngap1	Rsrc2	Gm2832	Il17rc		H60c
Gtf2ird1	Ndufaf6	Rprd2	Ndrg2	Serpinb10		Dclre1c
Ggt5	Eif2s3x	Dnm3		Elmo2		Arvcf
Plekha6	Pvt1	Ube2n		Cacna2d3		Slc16a7
1700086O06Rik	Gm3512	Araf		Rsbn1		Ccdc189
Gm11767	Palb2	Tm6sf1		Ccnh		Tmprss11a
Cage1	Camta2	Sgip1		Pbld2		Mlh1
Slc29a3	Acsf2	Ttc41		0610040B10Rik		Kif24
Unc5c	Ppih	Plekha6		N4bp2		Knop1
Atp5d	Atrx	D030028A08Rik		Gm28869		Cfap161
Pi4k2b	Tars2	B230208H11Rik		Porcn		Sp3
Terb1	Dtnb	Krtcap3		Rundc3b		Rian
Rspry1	Plekha1	RP24-122D14.3		Serpinh1		Ptprv
Atxn7l1	Rev1	Csnk1g1		Senp6		Rad52
Deaf1	Aplp2	Jak3		Syk		Tfb2m
Tbp	Col6a3	Zkscan7		Adgrl2		Zfp410
Nectin4	Grk4	Slc25a53		Tmem40		Gabre
Ccdc74a	Mast4	Gm10658		Grhl1		AV026068
Tc2n	Mdm2	Trpv4		Prkaa2		Cnnm1
Tmem40	Rad9b	Ankrd13c		Hdgfrp3
Tmprss2	Spry1	1700123M08Rik		Trmt10b
1300002E11Rik	Rps6kb1	Ecm1		Ehbp1l1
Samd12	Myo9a	2019-03-08		Dnase1l1
Aar2	Aen	Phka2		Isyna1
Raly	Ermard	Tm2d3		Cbx3
Dpf1	Slc7a7	Vcan		Ndufaf6
Dnlz	Ecm1	Ccl25		Myo9a
Mgea5	Pbx4	Ank3		Prdm15
Snap91	Atg4b	Dnm2		Ccm2
Zmym4	Pbrm1	Mylpf		Dcun1d4
Mapkap1	Ube2cbp	Actn2		Eif2s3y
Tmem50a	Pan3	Dgki		Cd44
Fmr1	Nme6	Pard3		Nlrp5-ps
Phldb2	A2m	Ccdc173		Mdm2
Smox	Nudt13	Fggy		Cdkl2
Vopp1	Clcn6	Sp4		Echdc2
Pi4k2a	Zfp114	Pan3		Slitrk4
Mycbp2	Phactr2	Scamp5		Lbr
Lcor	Madd	Fxyd7		Snap91
Mettl23	Polb	Plch1		RP23-235J18.1
Prkag2	Stat2	Slc1a3		Fam169b
Ppp1r16a	Mapk8ip3	Pigp		Gm16838
Prdm15	E130307A14Rik	Arhgdib		Gm13778
Eed	Supt20	Hfm1		Qpct
2019-03-08	Gm20662	Cacna1a		Nutf2
Vldlr	Pradc1	Slc35a2		Gtf2ird1
D1Ertd622e	Zfp783	Crebrf		Pusl1
Zmym3	Abl2	Baiap2l2		Relt
Trdmt1	Dysf	Pcnx		Supt20
Tmc6	Ppia	Sytl2		Pot1a
Ccdc138	Rtel1	Lrr1		Ccdc150
2700099C18Rik	Ank3	Nup210l		Stard10
Brat1	2810474O19Rik	Ice1		E130114P18Rik
Ranbp17	Gtf2h1	Kntc1		Kif21b
Erh	Stx16	Kcnk2		Nrgn
Hnrnpu	Abcc1	Fam198b		Fam188a
Zfp40	Slc9a8	Lzts2		6430573F11Rik
Atp5h	Tnrc6c	Aasdhppt		Hacl1
Gpatch2	Dcun1d2	Neurl1a		Cdyl
Kdm4c	Tns3	Gripap1		Zfp568
Zbtb11	Ddx59	Ric8b		Dpyd
Btbd7	Map4k4	Gm3752		Crim1
Eif2ak4	Bzrap1	Acsl1		Yipf2
Ociad1	Zfp930	Mettl20		Napg
Ank3	Fgfr1	Exoc3l		Cnnm2
Ctdsp2	Pam	Peli2		Pum1
Greb1	Serhl	Sdhc		Manba
Crim1	Mcfd2	Ttc39a		Prkdc
Ttll5	Srgap2	Camk2d		Mtch2
Tmem8b	Mbnl1	Kmt2c		Rpusd1
Ptpn12	Pitpnb	Setd4		Foxl2os
Slc2a4	Tbx3os1	Dnm1		Pi4kb
DHRSX	Arhgef11	Ska2		Fam188b
Rad54l	U2af1	Acad10		Loxl3
Carnmt1	A830010M20Rik	Lrrc73		Igf1
Zfp276	Abl1	Inadl		Grk4
Edem1	Appbp2os	Atg2a		Pvt1
Axl	Man2c1	Chst10		Arfip2
Zfp532	Cd59b	Kcnq4		Arhgef19
Phkg2	Ecel1	Mycbp2		Krtcap3
Wars2	Zfp661	Chchd6		Dpy19l1
Itpr1	Stat5a	Hmgcl		Tdrd1
Atp13a3	Cd36	Prkdc		Elmod3
Gnb1l	Klhl32	Zfp874b		Adgrl3
5830417I10Rik	Rabl6	2310057M21Rik		Lrrc49
Mpp7	Lactb	Col16a1		Ptbp3
Gm14207	Ankrd29	St7		Mir99ahg
9430015G10Rik	Anks1b	Sergef		Mybl1
Map4k1	Nat6	Thada		BC004004
Zfp239	Lcorl	Mutyh		Birc2
Nae1	Mapk4	Eldr		Ecm1
Il3ra	Slfn9	Trpc3		Casp2
Aamdc	Agbl5	Dnmbp		Dleu2
Rad52	K230010J24Rik	BC065397		Fsd1l
Entpd5	Srsf9	Fbxl3		Cadps
Slx1b	Rapgef2	Arid3a		Dusp12
Slc35c2	Lgals8	Rcor3		R3hdm1
Helz	Terf1	Trub2		Peli3
Nav2	Hnrnpdl	Melk		Dap3
Bbs7	Slain2	Aff3		Stau2
Ubr2	Rad52	Cbs		Fhod3
Safb2	Adcyap1r1	Gm9801		Tmem104
Ece1	Rps19	Trit1		Rnft2
Fam20b	Prmt9	Mvb12a		Acer2
BC004004	Efemp1	Ppp4r1l-ps		Rpf2
Fastkd3	Nop56	Zbtb37		1700066M21Rik
Slc30a9	Ankrd10	Crim1		Pqlc3
Klhl17	Pmm2	Slc26a11		Ddb2
Stard9	Ldah	Morf4l1		Foxn2
Adgre1	Mff	Smpd4		Tmem266
Mpc1	Hmcn1	Man2b2		D430036J16Rik
Ccdc15	Cenpu	Wipf3		Urgcp
Fbf1	Cyp4f13	Stx11		Osbpl1a
Pigb	Med20	1110017D15Rik		Gfm2
Osbpl6	Ap4e1	Afap1		Golga4
Gm26782	Zfp740	Josd2		Clk2
Adnp	Fip1l1	Prrt2		Eef1d
Zfp783	Vegfb	Sec16b		A230046K03Rik
4930432K21Rik	Noxo1	2610203C20Rik		Clasp1
F730043M19Rik	Nmt2	Wdr25		Baiap2
Zfp141	Aste1	Pkig		Card14
Slc45a4	Vegfa	Osbpl9		Kin
Lrch1	Zfp811	Osgepl1		Rer1
Sgf29	Faxc	Ube2d-ps		Ap1ar
Tulp4	Tfdp1	Lacc1		Phldb2
Slc8b1	Tsc22d2	Pde7a		2410002F23Rik
Zbtb49	Gm21969	RP23-114B10.6		Eya2
Ehhadh	Grik1	Zfp287		Rhno1
Timm23	Atr	Gm21811		Smad7
C2cd5	Mgmt	Relb		Ism2
Me1	Cux2	Gm4924		Qrich1
Pcgf2	1110004F10Rik	Cpne1		Bnip2
Piezo2	Zcchc6	Dmpk		Arfgap2
Vstm2b	Golga2	Rai1		Ldah
Wdr78	Slc16a11	Snx13		Ppp1cc
Tmod1	Gmpr2	Rapgef1		Otulin
Pgk1	Actn4	Adgrb2		Hook2
Tm7sf2	BC026585	Tnc		Slc35d2
Ccdc30	Inpp4b	Pitpnb		Proser2
Setd4	Mis18bp1	Abcg5		Spg7
D830030K20Rik	Atm	Dzank1		Zufsp
Rnf182	Ddx31	Trpm4		Rexo4
Ap4m1	Cdc14a	Gm8206		Epb41
Fancc	3110053B16Rik	Adamts9		1110004F10Rik
Fam229b	Sltm	Ttll3		Rab7b
Ddx26b	Abcd4	Pnkp		Spidr
Arhgap33	Ecsit	Cdhr4		Adam22
Zfp738	Plekha4	Kif24		Zfp532
Nphp3	Adgrg2	Zfp995		Adamts18
Fbxw11	Lgr6	Zc3h3		Gm3696
Ppp4r1l-ps	Mtmr1	Agap3		Cdhr4
Pvt1	Slc4a11	Ogfod2		Dimt1
Abhd14a	2410002F23Rik	Pgap2		Csnk2a2
Zfp512b	Ttbk2	R3hdm2		Ccdc38
Gfi1b	Dffb	Usp29		Zfp180
Fbxw17	Fbxw10	4930503L19Rik		Matr3
Tial1	Arhgef7	Tm2d1		Mysm1
A730017C20Rik	Top3b	Fam83g		Zfp113
Mcfd2	Cttnbp2	Ago3		Hdac9
Krtdap	Cbx5	Bnipl		H60b
Tia1	Tmem144	Gm20683		Pelp1
Mettl20	Thrap3	Gmpr2		Armc5
Qrich1	Xaf1	Slc43a1		Apod
Catsper2	Pdpk1	RP23-235J18.1		Chl1
Dlx1	Pde1c	Fam229b		Plekhg3
Dsc2	Gm13470	Arfip1		Ttll5
Emc8	Il3ra	Dclk2		Lef1
Slc2a8	Snx16	Anpep		Nrros
Jakmip2	Plagl1	Ss18		Pex11a
Mmaa	Usp13	Alg9		Kcnc3
Dda1	Nrg2	Tacc2		B4galt5
Zfp959	Zfp712	Mtif2		Aldoa
Plekhg6	Akap11	Kcnc3		Rabgef1
Mfsd13a	Ppp1r26	Ccdc62		Spire2
Nav1	B230311B06Rik	Xylb		Mbp
Diaph1	Malsu1	Ddx11		Slc26a11
Mvb12b	Rpl7a	Sltm		Cenpt
Nfia	Ifi27	Tpm3		Fam173b
Zfp280c	Ttc13	Sh2d5		Kank3
Kif21a	Chpf2	Neil2		Ada
Ncoa5	Gsto2	A230056P14Rik		Mtr
Oxnad1	Cdk5rap2	Timm23		Ccdc62
2310010J17Rik	Synrg	Erlin2		Bcl2l12
Prorsd1	Zfp420	Hspa14		Lrrc20
Ttc3	Cdc123	Gm4724		Usp13
Rab40c	Dlgap4	1700016H13Rik		Hp1bp3
Nrg1	Arhgap17	Plagl1		Sec22b
Eme2	Hdx	Fgd2		Kcnq4
Apbb2	Eaf2	Akap17b		Abcc1
Chrnb1	Srcin1	Mtf2		Gmppb
Gm12446	Enox1	Slc22a21		Susd1
Zkscan8	Cyp2d22	Ppp2r3a		Tmem54
Zfp113	Syde2	Il15		Nap1l4
Setbp1	Depdc1a	Spata6		Tsen2
Slc25a48	Dclk2	Postn		Chka
Tfdp2	Pacsin3	4933431E20Rik		St8sia4
Plpp1	Lrrc16a	Decr2		Atr
Fbxl12	Mettl10	Akt2		Adgrb2
D7Ertd443e	Pcdh17	Ercc6		Shisa7
Pcm1	Agbl2	Gm43720		Tmem161b
Pdgfa	Phf21a	Ergic2		Fam149b
Ndufs1	Tmem87b	Thap7		Kidins220
Trmt13	Lrrc8c	Igflr1		Mtmr1
Nanp	Agtpbp1	Zfp866		Six3os1
Pcyt2	Fam126b	Ddhd2		Pgs1
Mbnl3	Rpl5	Mettl17		Mtmr14
Stx3	Carf	Sema4c		1700109H08Rik
Dcp1b	2700081O15Rik	Abl2		Dcaf10
Kctd2	Csad	Qrich1		Isl1
Akr1c18	Cecr5	Ubap1		Pde1c
Rangrf	Mpdz	Nr2c2		Nemp2
Iqsec2	Igsf9	Gpatch11		Sobp
Zfp62	Eef2k	Zc3h11a		Eldr
Xpo4	Numbl	Snx29		Rad18
Stx16	Ftx	Ncor2		Ass1
2019-03-07	Lhfpl2	Map1a		Lrrc28
Ube2h	Gls	Atad3aos		Unkl
Adgrl1	Ccnyl1	Wiz		Ank3
Gm15264	Tro	Ppt1		Eno2
Krba1	Trpt1	Ptprs		Nacc2
Slc16a3	9530077C05Rik	Zscan20		Vcp
Obsl1	Rbm43	Fbxo48		Ywhag
Gm15408	Kif24	Ndufab1		Stx3
Sfi1	Zfp329	Tmem205		Acbd5
Ice2	Morn1	Zfp518b		Bean1
Crocc	Dennd6b	Zfp512		Cbfa2t3
Eva1b	Nap1l1	Dmtn		Zfp711
Ntan1	Zfyve16	Spry1		Rgs22
Mettl16	5930412G12Rik	Taf6l		Zfp286
Srsf6	Sema4d	Pxmp4		Stk38l
Tra2a	Izumo4	Agpat3		Wdr45b
Ptbp2	Exo1	Ikbkg		Ttll10
Srek1	Gpatch2l	Palb2		Nhlrc3
Rbm10	Pter	Isl2		Sepsecs
Mff	Nedd4	Fam13b		Ulk2
Zfp266	Spink10	Tyw3		Dusp16
Pdcd5	Gk5	Pcsk5		Sdhaf3
Glt8d2	Atat1	Socs5		Ict1
1110038B12Rik	Nudt7	Ncoa6		Tlcd2
1110004F10Rik	Cnnm1	Rffl		Pdzd2
Tnrc18	Trmt44	Dnaaf5		Ltbp2
Evl	Baiap2l2	Ptpdc1		Mbtd1
Zfp275	Gm43278	Inpp5a		Cftr
Kif3a	Eif2ak4	Thap6		Asxl3
Aph1b	Als2cl	Usp30		Ccdc85a
D130040H23Rik	Rab2b	Comt		Atf7ip2
Ism2	Tmem44	Eefsec		Coq8a
Srsf11	Zcchc17	Chd7		Ppp4r1l-ps
Wnk1	Klf2	Immp1l		Micall1
Lrrc40	Zfp346	6330408A02Rik		Socs2
Mettl3	Mllt10	Gm13187		Layn
Zfp329	Got1l1	Herc3		Rcor3
Nrip2	Tmcc1	Kdm6a		Pfkfb2
Slc30a5	Ddb2	Wdyhv1		Dph7
Clpx	Lrch2	Trappc9		Tecr
Arl5c	Nprl3	Qser1		Eif2s3x
Adgrg2	Zfp608	Sars2		Angel1
Fbxo44	Gpm6b	Kctd9		Rpl36a
Tmem185a	Gspt2	St3gal6		AI413582
Ankrd10	Caps2	Ntng2		Cobl
Stra13	Jmjd6	Lrrc61		Cit
Pcdh11x	Gzf1	Swt1		Esrp1
Gm44596	Yap1	Pnpla6		Tdrd3
Sec24b	Dnase2a	Porcn		Helq
Cdk1	Rab11fip3	Ccdc57		Zfyve28
RP23-357C16.1	Bnc2	Mrps18c		Ttbk2
Cpsf3l	Plekhm2	Tulp4		Gprasp1
Necap2	Ints10	Taf4		Mpdu1
Gtdc1	Aim2	Tbc1d22a		Phc1
Spidr	Zfp141	Rps6ka3		Apobec1
Tyk2	Capn15	C030037D09Rik		Setd6
Uckl1	Gm28042	Dnajc25		Flnb
Cd74	Mrpl33	Slc29a3		Tm7sf3
Emid1	Ncor1	Kctd17		Alg3
Rfng	Zfp862-ps	Gpsm2		Ubac1
Ercc6	Afmid	Pex11g		Mb
Cbx8	Ubn1	Tmem38a		Sass6
Abcc10	Ubn2	Uvssa		Anp32a
Ndst3	D430041D05Rik	Dnajb14		Trappc6b
AI314180	Scn8a	Paxip1		Gemin7
Cnot2	Trim26	Gstp2		Orc6
Strn4	Zfp385b	Endov		Slc30a9
9030624G23Rik	Zfp68	Gnb1l		Abi3bp
Clk4	Med12l	Atf7ip		Flt3l
Cep57l1	Slc25a26	Pds5b		Gosr2
Cep164	Ccdc120	Tpcn2		Tbc1d25
6430531B16Rik	Dnaaf3	Csrnp3		Slc25a53
Tspan9	Pfkfb2	Apc		4930402H24Rik
Asxl3	Mecom	Firre		Zfp827
Actr3b	Fat1	Cyb5rl		Hdac1
Idh3g	Ppfia1	E230016M11Rik		Arhgap1
Rps6kb1	Spag9	Atg4a		Eif4e2
Vps51	Crispld1	Map4k1		Zfp385b
Ttc23	Card19	Dnah7b		Ptpn6
Sema6d	Ndc1	Kifc3		Papln
Vps37d	Fbxo17	Jpx		Rars2
BB218582	Ube2h	Sptan1		Kirrel
Cttnbp2	Eif2ak1	Ift46		Gtpbp6
Slc9a5	Zfand4	Phc2		Lrsam1
Tnc	Git2	Aifm1		Fam208a
Gm20517	Alkbh3	Rbpms2		Efhc2
Naaladl1	Ccdc60	Pkmyt1		Sorbs2
Patz1	Hp1bp3	Nrd1		Tenm2
Fam193b	Slmo1	Ccdc88a		Dmtf1
Ecsit	Fau	Uap1l1		Ftx
Pelp1	Tatdn1	Cep295		Crebrf
Prr14l	Ppfibp1	Tbc1d31		9230110C19Rik
Adam23	Trabd	Zfp235		Lyrm5
Ceacam10	Rsrc2	Clip1		Iqsec1
Map2k4	Erich2	Ankrd28		Fancl
Spata6	Cacna1d	Chpt1		Fgd6
Lrp12	Prr13	Golga2		Fgd2
BC006965	Ankrd13d	Rbms3		Tmem178
Tnks1bp1	Mro	Actr3b		Git2
Mcmdc2	Cspp1	Zfp526		Rcc2
Cdc42bpa	Ube2j2	Zfp119b		Camkk2
Pan3	Armcx1	Zkscan6		Spats1
Nhsl1	Sgce	Azi2		Tnc
Ankrd13d	Gm26881	Slc25a28		Stap1
Bcor	Aif1l	Ube2g1		Aim2
Arhgef10	Map2k5	Zfp939		Oxnad1
Cd68	Erg	Rnf170		Spata1
Mettl4	Nrcam	Srsf11		Ccdc109b
Ccdc150	Epn3	Slc38a10		Pank1
Dnajc19	Cpeb2	Kifc1		Dfna5
Zfp280d	Stxbp2	Ermard		Slc25a40
Cenpa	Mettl25	Cpa2		Gpatch2l
Pkp4	Snhg3	Lime1		Fgd4
Paqr6	Pou2f1	Agbl5		Fam76a
Nudt5	Phka1	Tet3		Pcnx
Rai1	Adam22	Sidt2		Osbpl5
Mapt	Spata13	Ube2j2		Dnajc6
Akap13	Runx1t1	Mcoln1		Tbck
Amot	2700049A03Rik	Hip1r		Mast3
Aasdh	Pigv	Gm684		Atg4c
Casp8ap2	Dcbld1	Cfap97		2410018L13Rik
Dock8	Mcf2l	Arhgef7		Tacc2
Sphkap	D330041H03Rik	Ggcx		Hace1
Traf7	Pnkp	Efna5		Tmem234
Gm6938	Map3k5	Opn3		Dexi
Adam22	Fam184a	Hecw2		Fes
Dhrs13	1700028J19Rik	Slc22a17		Swt1
Ntm	Mpped2	Cald1		Nup35
Cnot1	RP23-480D17.3	Fam149b		Fam129c
Dedd	Rbpms	Srsf4		Cyp2d22
Trpm4	Rere	Zhx1		Rfx3
Rars2	Disc1	Cnppd1		Snx5
Slc29a2	Trmt13	Fam188a		Pnpla6
Papss1		Ccdc136		Tctex1d2
Slmap		Eif2s3y		Shank1
Alpk1		Micall1		Mtus2
Spink8		Lrrc51		Gm26920
Rasgrf1		Nme6		Chrnb1
Lrr1		Cpsf1		2010315B03Rik
Fam110b		Mdm1		Tepp
Celf4		C2cd2l		Epg5
Hpca		Zfp142		Chek2
Phf21a		Pigq		Ccdc120
2310030G06Rik		Gfra1		Fibp
Gm42878		Cep44		Zdhhc20
Mga		Osbpl6		Plk4
Tepp		Lbr		Fibcd1
Ptbp1		Aasdh		Iqcb1
Nfyc		Kmt2d		Zmynd8
Brpf3		Gm14325		Ttc19
Rab25		P4ha2		Myo7a
Egfem1		Enkd1		Fam35a
RP23-316L10.2		Fnbp1		5930412G12Rik
Stag1		Esco1		Oprl1
Ltbp2		Ddias		Tsen54
Duoxa1		C87436		Cntrl
St6galnac2		Mir99ahg		Vwa5a
Usp33		Arid5a		Ythdc2
Golga2		Hax1		Agbl2
AV026068		Trmt44		Slc17a5
Arpp21		Fbxo36		Aen
Ezh2		Arfgap1		Kif17
Atg3		Wnk4		Hmces
Dbr1		Stard5		Slc22a23
Cacna1d		Mdn1		Snx22
Nfix		Polm		Smarca2
Slfn5		Micu3		Dis3l2
Dusp6		Nsmf		Aldh4a1
Snap23		Fahd2a		Haus8
Srp19		Mrps17		Ccdc158
Ubtf		Vav3		Ankrd26
Ank1		Rev1		Gas2
Arhgef26		Dcbld1		Map3k12
Vrk1		Cipc		Faxc
Rgs12		Fam227a		Uxt
Meis1		Celsr1		Zfp317
Adgrl3		Ybx2		Arfip1
Cntrl		Jag2		Nsmf
Zgrf1		Lyrm1		Dnajb4
Macrod1		Ssc4d		Adgrg3
Zcchc17		Cd44		Zfx
Pik3c2a		Map4k3		Ablim3
Rbm6		Cacnb3		Nlgn3
4930503L19Rik		Acrbp		Rabggtb
Rbms3		Zfp937		Ogdhl
Gm28036		Gse1		Osbpl6
2610316D01Rik		Adamtsl1		Ccnyl1
Srcap		Plekha4		Nap1l1
Rpl19		Nup62cl		Zfp991
Nlgn3		Klc1		Map2k5
Emc9		Gabpb2		Elavl2
Samd15		Gria4		Pih1d2
Pdzd2		Runx1		Ipo9
Herc4		Uba3		Ntng2
Mef2d		Kdm3b		Kdf1
Cd59a		Rab10os		Cds1
Adam33		Fam219b		Atp6v1f
Zfp558		Nkain4		Uqcc1
4933427D14Rik		Phf21b		Ano9
Hook3		Ifi27		D030068K23Rik
G3bp1		Gm15265		Eps8l1
Ccdc155		Cflar		Afmid
Mrpl23		Ccdc66		Adat1
Macrod2		Dkkl1		Naglu
Lrrc61		Sec31a		Esco1
Fbxl2		Rbm5		Slc39a14
Cntn4		Rsl24d1		Cep89
Ap1g2		Fam126a		Tatdn1
Metap1d		Ric8a		Ccdc171
Gemin8		2410018L13Rik		Irak1
Ppara		Ago4		Aaed1
Cpt2		2410002F23Rik		Dach1
Ptch2		Iqce		Eps15l1
Tmlhe		Cables2		Rpain
Abhd18		Acox1		Tmem147os
Dock10		Tmlhe		D830044I16Rik
Rnf38		Gpr160		Tfb2m
Ythdf1		G2e3		Bace2
Prokr2		F8		Anapc16
Smpd4		Bcor		Tsku
Sirt3		Ccdc36		Tmem55b
Tbc1d8b		Akap12		Rhobtb3
Hace1		Ppil2		Prkcq
Pigq		Ctdspl		Rnaset2a
Dcun1d2		Fam169b		Il2rg
Tmem44		Ptges3		Vps18
Osbpl3		Rad23a		Clgn
Ankra2		Gm20324		Daglb
Rgs7		Ssh3		Slc9a5
Slc16a13		Mbtps2		Cep63
C530008M17Rik		Axl		Meg3
Cklf		Gm16835		Grik4
Fgfr1		Dmc1		Sipa1
Dcp1a		Slco5a1		Ptprs
Fn1		Gab3		Ccdc77
Saxo1		Gm44965		Cpsf4l
Rsrp1		Pde10a		Ift46
Traip		Pot1a		Adamts6
Dcaf10		Mib2		Pcnp
Phf19		Nkiras1		Cep164
Dock11		A630001G21Rik		Polk
Ctbp2		Neto2
Ccdc136		Dbt
Eda		1110004F10Rik
Nt5c3		Phyhd1
Phc3		Hpf1
Pex12		Prtg
Sys1		Cnbd2
Dclre1c		Hsd17b7
Eif4a1		Ankrd24
Cadm3		Oprl1
Sidt2		Sbf1
Eif2c5		Mrpl52
Meis3		Bcas1os1
Tpra1		Myef2
Lgr6		Il3ra
Ints8		Ip6k2
Pltp		Tnrc6a
Ephb6		Zdbf2
Tbc1d13		Slc22a18
Klhdc1		Fastk
Tvp23a		Noxo1
Btbd19		Zfp595
Slc38a2		Slc37a3
Meaf6		2410004P03Rik
Zfp740		Npm2
Taf15		Kxd1
Pdxdc1		Samd8
Cyb5r2		Smc2
Dbt		Gsn
Adgrg6		Aste1
Tmem234		Gcc2
Kazald1		Zfp219
Ubap2l		Gm5148
Lins1		Dlx6os1
Dus2		Akap11
Coq6		Tert
Galns		Zfp420
Fam69c		Ascc3
Cnnm1		Bap1
Sox17		Tmem62
Accs		Tmem63b
Ercc8		Ccdc109b
Abhd10		Notum
Bnipl		Stk25
Nell1		Tmem68
Zfp512		Clasrp
Nbr1		Cep78
Abi3bp		Nmnat3
Zfp78		Zfp820
Dclre1b		6530437J22Rik
Dph3		Bend7
Top3b		Dhx58
Gfra2		T2
Cdk8		Mta3
Thap6		Pms2
Eldr		Synpo
Itsn1		Aph1a
Rapgef6		Gm28551
Mcee		Ccdc97
Uqcc1		Pikfyve
Tm9sf1		Sorbs3
Fam20a		Ccdc157
Tmem175		Golga1
H2-T24		Lrrc9
Fndc3b		Tmtc4
Prkd1		Prkcb
Gamt		Slc12a8
Dnase1l1		Ccdc142
Otud6b		Snx16
Rpl12		Hnrnph1
Rbm33		Polh
Paox		Nrk
Tnrc6b		Letm2
Slc39a13		Zc3h12b
Ryr1		Gria2
Ormdl2		Xndc1
Arih2		Abcg2
Ubald2		Zfp947
Gm2762		Gpm6b
Sdccag3		Phka1
Cadm1		Trap1
Fbrsl1		Gstk1
Lhx6		Adcy8
Col6a3		Ralyl
St7l		Rangap1
Lef1		Xpo6
Vwce		Myom1
Eif2s2		Vegfd
Frzb		Pigg
Krtcap3		Acaa1b
Lrrtm4		Ndufb5
Echdc2		Agbl3
Myo9b		Evi5
Ppia		Kdm8
		Mrpl33
		Fuz
		Arsk
		Zfp185
		Ptk2b
		Adamts14
		Phf21a
		Tanc2
		Nr1d2
		Polr3c
		Acot8
		Pigv
		Aldh3a2
		Anxa6
		Mpc1
		Tlcd2
		Glrb
		Zfp991

## Sheet: GO_Biological_Process_2018
Age
Term	Overlap	P-value	Adjusted P-value	Odds Ratio	Combined Score	Genes
regulation of mRNA splicing, via spliceosome (GO:0048024)	24/61	3.95043e-06	0.020159	2.59014	32.2257	SRPK2;ZC3H10;RBM25;MBNL1;TIA1;MBNL2;FMR1;CELF3;CELF4;HNRNPU;PRDX6;JMJD6;HNRNPL;PTBP1;THRAP3;TRA2B;SRSF4;RNPS1;METTL16;SRSF6;MBNL3;HNRNPA1;RBM5;SRSF9
regulation of alternative mRNA splicing, via spliceosome (GO:0000381)	17/40	3.08229e-05	0.0393223	2.79789	29.0624	ZC3H10;RBM25;MBNL1;MBNL2;FMR1;CELF3;CELF4;HNRNPU;HNRNPL;PTBP1;THRAP3;TRA2B;RNPS1;MBNL3;HNRNPA1;SRSF6;RBM5
regulation of microtubule polymerization (GO:0031113)	16/36	2.68324e-05	0.045642	2.9259	30.7977	NUMA1;DCTN1;SLAIN2;CAMSAP1;EML2;CAMSAP3;CLIP1;NAV3;MAP2;STMN1;AKAP9;ABL1;MAPT;MET;CLASP1;CDK5RAP2
stress-activated protein kinase signaling cascade (GO:0031098)	25/71	2.4545e-05	0.0626265	2.31806	24.6062	NRK;MAPKAP1;CUL1;IKBKB;SLK;NEK1;KAT7;IKBKG;BTRC;MAP2K7;MAP4K5;MAP3K7;MAP3K4;MAP2K5;MAP4K3;MAP3K5;MAP4K4;MAP4K1;MAP2K4;FBXW11;MINK1;STK25;CCM2;TNIK;MAP3K14
protein phosphorylation (GO:0006468)	103/471	6.16923e-05	0.0629632	1.43966	13.9551	STK19;RPS6KA3;SLK;EFEMP1;RPS6KA5;AKT2;CHEK2;NEK1;MAP3K7;MAP3K5;CDKL3;CSNK1G3;CSNK2A1;PRKCB;PHKA1;VRK1;CSNK1D;PHKA2;MELK;MAPKAPK3;SIK3;MAPKAPK5;PRKD1;TNIK;ERG;SIK2;CSNK1G1;PRKDC;WNK4;PRKCZ;TTBK2;STK33;NUAK1;ABL1;ABL2;STK38L;MARK2;SRPK2;SMAD2;CDK19;DMPK;EIF2AK1;DCLK2;CDC7;EIF2AK4;SMAD7;CDK8;STK25;WNK1;WNK2;WNK3;CDK1;AAK1;ATM;CDK12;FGFR3;FGFR2;MAP3K12;ATR;FGFR1;DDR1;DYRK2;MAST4;LRRK2;PIK3CB;PKD1;IKB…
regulation of microtubule polymerization or depolymerization (GO:0031110)	10/18	8.68983e-05	0.0633489	3.65738	34.1993	CAMSAP3;MAP2;MAP1A;STMN1;ABL1;MAPT;CAMSAP1;CLASP1;SKA2;CLASP2
phosphorylation (GO:0016310)	87/387	8.15622e-05	0.0693686	1.47996	13.9326	PANK2;DGKD;DYRK2;DGKA;LRRK2;STK19;PIK3CB;IKBKB;RPS6KA3;PPP3CB;RPS6KA5;FASTK;CHEK2;TLK2;NEK1;TLK1;JAK3;XYLB;MAP3K5;MAP4K1;CDKL3;CSNK2A1;SYK;PRKCB;PDPK1;MINK1;PHKA1;VRK1;CSNK1D;TYK2;PHKA2;TGFBR1;MELK;LATS2;SIK3;FAM20B;BIRC6;PRKD1;TNIK;ERG;SIK2;FAM20A;DGKI;RNASEL;CAMK2D;PRKDC;ROCK2;PNKP;WNK4;PRKCZ;GK5;NUAK1;FGGY;MKNK1;PHKG2;ATP5D;ABL1;PGK1;STK38L;PTK2B;MAP4K5;FNIP2;MAP4K3;MARK2;MAPK4;MAP4K4;SRPK2;CD…
regulation of microtubule cytoskeleton organization (GO:0070507)	11/23	0.000222836	0.103375	3.14852	26.4762	CAMSAP3;ATAT1;PHLDB1;STMN1;MAPT;EFNA5;BICD1;PHLDB2;CLASP1;SKA2;CLASP2
response to hydroxyurea (GO:0072710)	6/8	0.000259374	0.110299	4.93746	40.7698	BLM;FMR1;DDX11;ATRX;KAT7;SPIDR
lamellipodium assembly (GO:0030032)	11/23	0.000222836	0.113713	3.14852	26.4762	CYFIP1;CCDC88A;DMTN;ABLIM3;PTPRO;SPATA13;ARFIP2;WHAMM;SRGAP2;ARHGEF7;ARHGEF6
regulation of small GTPase mediated signal transduction (GO:0051056)	38/141	0.000217662	0.123414	1.77422	14.9612	FAM13B;ARHGEF26;SRC;ITSN1;RASGRF1;ARHGAP1;ARHGAP39;ARHGAP17;FOXM1;KALRN;ARHGAP12;ARHGAP4;FGD2;SYDE2;AKAP13;RHOT1;MCF2L;ARHGDIB;SRGAP3;SLIT2;A2M;SRGAP2;ECT2;ARHGEF11;VAV3;ARHGEF12;ARHGEF19;ARHGAP29;ARAP3;MYO9B;GMIP;MYO9A;VAV2;ARHGAP33;ARHGEF9;DLC1;ARHGEF7;ARHGEF6
microtubule nucleation (GO:0007020)	9/17	0.000322982	0.126783	3.48527	28.0143	GOLGA2;AKAP9;TUBGCP6;SLAIN2;CSNK1D;TUBG2;CLASP1;NDEL1;CLASP2
DNA repair (GO:0006281)	67/289	0.000203006	0.129492	1.52623	12.9764	RPAIN;DCLRE1B;MUS81;SETD2;DCLRE1C;HMGB2;PARK7;ALKBH3;POLB;ENDOV;EME1;EME2;EXO1;CHEK2;ALKBH1;UIMC1;TNKS1BP1;POLH;SLC30A9;LIG1;NCOA6;USP45;RAD23A;INIP;DDB2;NEIL2;FANCD2;NEIL1;BLM;PRKDC;PNKP;DOT1L;IGHMBP2;PDS5B;RECQL5;SLX4;MTA1;USP1;ABL1;RAD54L;PMS2;ASCC3;PMS1;MUTYH;MBD4;FANCM;POLN;ERCC6L2;MGMT;HUWE1;HMGA1;GTF2H1;FANCC;GTF2H2;FANCE;PALB2;MAD2L2;RAD52;TDP2;UBE2N;CDK1;ERCC8;MMS19;ATM;ERCC6;RAD9B;ATR
regulation of extent of cell growth (GO:0061387)	5/6	0.000422691	0.1438	5.48607	42.6205	OLFM1;CTTN;ABL1;NRCAM;DNM2
microtubule polymerization (GO:0046785)	12/28	0.000413516	0.150726	2.82141	21.981	GOLGA2;TRPV4;AKAP9;TUBGCP6;SLAIN2;CSNK1D;TUBG2;MAPT;FGF13;CLASP1;NDEL1;CLASP2
vesicle-mediated transport (GO:0016192)	87/411	0.000666307	0.154553	1.39354	10.192	USP6NL;LRRK2;WIPF3;SNAP23;GCC2;MIA3;PIK3C2A;GOLGA4;AP1G2;TOM1;CPNE1;KIF1B;ERC1;KIF1A;GPRASP1;VPS39;APPL1;PLEKHJ1;CSNK1G3;BCAS3;STX8;APLP2;ARAP3;SCRIB;VRK1;CSNK1D;TC2N;RBSN;MAPK8IP3;ARFGAP1;DNM1;SYTL2;DNM2;DNM3;RABEP1;CTAGE5;BIN1;KXD1;CHMP3;RIN3;PRKD1;TBC1D23;SFT2D2;SFT2D1;CSNK1G1;SEC22C;NAPB;TMEM87B;STX16;DCTN1;FAM109A;DENND3;AGAP3;LRP8;KALRN;STX11;NCALD;MTM1;HMGXB4;CUX2;VPS51;MYO6;MICALL1;ATP6V1…
establishment of mitotic spindle localization (GO:0040001)	9/18	0.000559066	0.158495	3.29164	24.6519	GPSM2;NUMA1;ESPL1;DCTN1;HTT;CENPA;CLASP1;CDK5RAP2;NDEL1
regulation of microtubule depolymerization (GO:0031114)	10/22	0.000716127	0.158887	2.9924	21.6699	CAMSAP3;NAV3;APC;TRPV4;MAP1A;FGF13;CAMSAP1;CLASP1;TTBK2;CLASP2
negative regulation of RNA metabolic process (GO:0051253)	8/15	0.000661469	0.160737	3.51108	25.7048	NCOR2;ZC3H10;PTBP1;SHQ1;NCOR1;TERT;PTBP2;PTBP3
regulation of cytoskeleton organization (GO:0051493)	27/96	0.000831443	0.163187	1.85155	13.1318	PHLDB1;ROCK2;NEXN;PDGFA;STMN4;ARHGAP17;EFNA5;BICD1;STMN1;ABL1;CLASP1;GPM6B;MARK2;EPHA5;DMTN;ARHGEF19;HIP1R;BAIAP2;SORBS3;ATAT1;CAMSAP3;DIAPH1;CCDC88A;DLC1;PLXNB1;MAPT;PHLDB2
positive regulation of microtubule polymerization (GO:0031116)	11/25	0.000547533	0.164357	2.89664	21.754	MECP2;CLIP1;NUMA1;NAV3;DCTN1;AKAP9;SLAIN2;MAPT;MET;CLASP1;CDK5RAP2
protein modification process (GO:0036211)	25/85	0.000622906	0.167299	1.93626	14.2917	PRKDC;ARAF;PLOD2;UBE2L3;DUSP12;PPP4R2;AKT2;ABL1;ABL2;ST3GAL6;UBL4A;CDKL3;ATG3;CSNK1G3;UBE2I;MCRS1;WDYHV1;PHKA2;GNMT;GGCX;UBE2S;UBE2N;UBA3;FBXL2;BAP1
modulation of excitatory postsynaptic potential (GO:0098815)	11/26	0.000819624	0.167302	2.78523	19.7937	NLGN3;RIMS2;RIMS1;MTMR2;CUX2;DLG4;LRRK2;NRXN1;TMEM108;PTK2B;PRKCZ
regulation of clathrin-dependent endocytosis (GO:2000369)	8/15	0.000661469	0.168774	3.51108	25.7048	DAB2;TNK2;HIP1R;AAK1;ARAP3;PIK3CB;SNAP91;PICALM
lamellipodium organization (GO:0097581)	11/26	0.000819624	0.174273	2.78523	19.7937	CYFIP1;CCDC88A;DMTN;ABLIM3;CTTN;PTPRO;SPATA13;ARFIP2;WHAMM;ARHGEF7;ARHGEF6
positive regulation of microtubule polymerization or depolymerization (GO:0031112)	11/25	0.000547533	0.174629	2.89664	21.754	CLIP1;NUMA1;NAV3;DCTN1;TRPV4;AKAP9;SLAIN2;MAPT;MET;CLASP1;CDK5RAP2
peptidyl-serine phosphorylation (GO:0018105)	37/146	0.000934337	0.17659	1.66837	11.638	CAMK2D;MAST4;PRKDC;ROCK2;LRRK2;PRKCZ;PKD1;TTBK2;IKBKB;RPS6KA3;STK33;CHEK2;AKT2;MKNK1;PHKG2;TLK2;STK38L;MAP4K1;CSNK1G3;DMPK;PRKCB;PDPK1;DCLK2;VRK1;CSNK1D;CDC7;TGFBR1;MAPK12;LATS2;MAPKAPK3;CDK1;MAPKAPK5;ATM;PRKD1;CSNK1G1;MAP3K12;ATR
layer (Ect_vs_Mes)
Term	Overlap	P-value	Adjusted P-value	Odds Ratio	Combined Score	Genes
protein phosphorylation (GO:0006468)	110/471	6.4961e-08	0.000331496	1.63777	27.1042	CCNT1;GMFG;RPS6KA3;SLK;EFEMP1;RPS6KA5;AKT2;CHEK2;NEK1;NEK3;MAP3K7;MAP3K5;CDKL2;ACVR1;PDGFRB;CDKL3;CSNK1G3;CSNK2A1;PRKCB;DYRK1A;PHKA1;VRK1;CSNK1D;PHKA2;MELK;MAPKAPK3;SIK3;ULK2;PRKCQ;TNIK;ERG;CSNK1G1;PRKDC;WNK4;PRKCZ;TTBK2;NUAK1;IRAK1;ABL1;ABL2;STK38L;MARK2;PLK4;SRPK2;DMPK;NEK4;EIF2AK1;DCLK2;CDC7;PHKB;EIF2AK4;DCLK1;SMAD7;CLK2;STK25;WNK1;FES;WNK2;WNK3;AAK1;CDK10;MAP3K10;ATM;CDK12;FGFR3;FGFR2;MAP3K12…
peptidyl-serine phosphorylation (GO:0018105)	41/146	1.01307e-05	0.0129243	1.9693	22.6468	SMG1;CAMK2D;PNCK;PRKAA2;MAST4;PRKDC;MAST3;ROCK2;PKN3;LRRK2;PRKX;PRKCZ;PKD1;TTBK2;CAMKK2;IKBKB;RPS6KA3;CHEK2;AKT2;MKNK1;TLK2;STK38L;CAMK2G;MAP4K1;CSNK1G3;DMPK;PRKCB;PDPK1;DYRK1A;DCLK2;VRK1;CSNK1D;CDC7;DCLK1;MAPKAPK3;MAP3K10;PRKCQ;ATM;CSNK1G1;MAP3K12;ATR
stress-activated protein kinase signaling cascade (GO:0031098)	25/71	8.05561e-06	0.0137026	2.46923	28.962	NRK;MAPKAP1;CUL1;IKBKB;SLK;NEK1;IKBKG;PAK3;MAP3K7;MAP3K4;MAP2K5;MAP4K3;MAP3K5;MAP4K4;MAP4K1;MAP2K4;NEK4;FBXW11;STRADB;MINK1;NFKB1;STK25;CCM2;TNIK;MAP3K14
phosphorylation (GO:0016310)	87/387	7.58569e-06	0.0193549	1.57648	18.5855	PANK2;DGKD;CCNT1;GMFG;DGKA;LRRK2;IKBKB;RPS6KA3;PPP3CB;RPS6KA5;FASTK;CHEK2;TLK2;NEK1;NEK3;JAK3;XYLB;MAP3K5;CDKL2;ACVR1;MAP4K1;CDKL3;CSNK2A1;SYK;PRKCB;PDPK1;MINK1;DYRK1A;PHKA1;VRK1;CSNK1D;PHKA2;MELK;SIK3;BIRC6;TNIK;ERG;DGKI;RNASEL;CAMK2D;PRKAA2;PRKDC;PKN3;ROCK2;PNKP;WNK4;PRKCZ;CAMKK2;GK5;NUAK1;FGGY;IRAK1;MKNK1;ABL1;STK38L;PTK2B;FNIP2;MAP4K3;MARK2;MAPK4;MAP4K4;PLK4;SRPK2;SURF1;DMPK;GK;NEK4;TNK2;PHKB…
vesicle-mediated transport (GO:0016192)	89/411	2.75379e-05	0.023421	1.51855	15.9447	DENND1C;VPS29;DENND1A;LRRK2;WIPF3;GCC2;MIA3;GOLGA4;TOM1;CPNE1;KIF1B;ERC1;KIF1A;GPRASP1;BVES;VPS39;VPS18;CSNK1G3;BCAS3;APLP2;VPS33B;SYTL1;ARAP2;SCRIB;VRK1;CSNK1D;COMMD1;ARAP1;MAPK8IP3;ARFGAP1;DNM1;SYTL2;ARFGAP2;DNM2;DNM3;ACAP3;VAMP7;BIN1;KIF16B;KXD1;RIN3;TBC1D23;SEC22B;RAB7B;SFT2D1;CSNK1G1;SEC22C;NAPB;TMEM87B;STX16;DCTN1;GOSR2;TGFBRAP1;RHOBTB3;CLEC16A;DENND3;AGAP3;LRP8;KALRN;STX11;MTM1;HMGXB4;CUX2…
protein autophosphorylation (GO:0046777)	46/176	2.33963e-05	0.0238783	1.83284	19.5435	DDR1;SMG1;CAMK2D;LRRK2;PRKX;CAMKK2;SLK;EEF2K;IRAK1;CHEK2;MKNK1;ABL1;ABL2;PTK2B;JAK3;MARK2;PDGFRB;MAP4K1;SYK;PDPK1;TNK2;EIF2AK1;MINK1;DYRK1A;VRK1;EIF2AK4;MAPK15;CLK2;MELK;TEC;MAPKAPK3;STK25;FES;WNK2;WNK3;AAK1;ULK2;MAP3K10;ATM;TNIK;CDK12;FGFR3;FGFR2;FGFR1;MAP3K12;ATR
regulation of small GTPase mediated signal transduction (GO:0051056)	38/141	5.66454e-05	0.0361327	1.88993	18.481	ARHGAP9;FAM13B;ARHGAP1;ARHGAP18;ARHGAP39;ARHGAP17;FOXM1;KALRN;ARHGAP12;ARHGAP4;FGD2;SYDE2;FGD4;RHOT1;RACGAP1;MCF2L;ARHGDIB;CHN1;A2M;SRGAP2;ECT2;ARHGEF11;VAV3;ARHGEF12;STARD8;ARHGEF19;ARAP2;ARHGAP29;OCRL;MYO9B;ARAP1;GMIP;MYO9A;VAV2;ARHGAP33;ARHGEF9;ARHGEF7;ARHGEF6
ciliary basal body-plasma membrane docking (GO:0097711)	29/97	5.58311e-05	0.0407008	2.09656	20.532	C2CD3;DCTN1;FBF1;CEP164;CCP110;TTBK2;HAUS8;CNTRL;TCTN1;NPHP4;PCNT;NINL;YWHAG;CLASP1;CDK5RAP2;CEP78;PLK4;IQCB1;CEP152;KIF24;HAUS3;CSNK1D;RPGRIP1L;AKAP9;B9D1;CEP63;SFI1;CEP89;SDCCAG8
DNA repair (GO:0006281)	65/289	0.000100378	0.0426856	1.57723	14.5209	RPAIN;MUS81;SMG1;DCLRE1C;MPG;HMGB2;CIB1;BRCA1;ALKBH3;POLB;ENDOV;KAT5;EME1;EME2;EXO1;CHEK2;ALKBH1;UIMC1;POLK;POLH;SLC30A9;NCOA6;RAD23A;INIP;DDB2;NEIL2;RAD51C;FANCD2;NEIL1;RHNO1;VCP;BLM;PRKDC;PNKP;DOT1L;PDS5B;SLX4;MTA1;USP1;ABL1;RAD54L;PMS2;ASCC3;MUTYH;ZRANB3;MBD4;FANCM;ERCC6L2;MGMT;FANCL;HUWE1;GTF2H1;GTF2H2;FANCE;PALB2;MLH3;SETX;RAD52;TDP2;UBE2N;ATM;ERCC6;RAD9B;RAD18;ATR
modulation of excitatory postsynaptic potential (GO:0098815)	12/26	9.47e-05	0.0439322	3.2366	29.9864	NLGN3;RIMS1;MTMR2;CUX2;DLG4;LRRK2;GPRIN1;TMEM108;PTK2B;PRKCZ;SHANK3;SHANK1
protein modification process (GO:0036211)	26/85	8.70844e-05	0.0444392	2.14504	20.0532	PRKDC;ARAF;PLOD2;DUSP12;PPP4R2;AKT2;ST8SIA4;ABL1;ABL2;ST3GAL6;CDKL3;CSNK1G3;MANBA;UBE2I;ICMT;MCRS1;WDYHV1;RABGGTB;PHKA2;GNMT;GGCX;QPCT;UBE2N;UBA3;B4GALT7;BAP1
DNA metabolic process (GO:0006259)	70/315	8.25192e-05	0.0467884	1.55836	14.6525	RPAIN;MUS81;SMG1;HMGB2;BRCA1;ALKBH3;POLB;ENDOV;TATDN1;KAT5;EXO1;ALKBH1;SMARCAD1;POLK;KPNA2;POLH;POLG;TOP3B;DFFB;TIPIN;NCOA6;ATRX;REV1;TERF1;INIP;DDB2;KIN;RAD51C;FANCD2;DMC1;RBMS1;RHNO1;DNASE1L1;PIF1;RTEL1;BLM;VCP;UHRF2;PRKDC;HDAC1;PNKP;DOT1L;PDS5B;SLX4;ORC6;TERT;ORC1;CBS;ERI2;RAD54L;MUTYH;ZRANB3;MBD4;TCF7L2;MGMT;FANCL;EGF;PTGES3;CDC7;GTF2H1;NAP1L1;IGF1;PALB2;RAD52;NASP;UBE2N;ATM;RAD9B;RAD18;ATR
regulation of microtubule cytoskeleton organization (GO:0070507)	11/23	0.000124808	0.0489918	3.35386	30.147	CAMSAP3;ATAT1;CYLD;PHLDB1;MAPT;EFNA5;BICD1;PHLDB2;CLASP1;SKA2;CLASP2
cytoskeleton organization (GO:0007010)	34/127	0.000156142	0.0531195	1.8774	16.4549	MAST4;MAST3;RHOBTB3;SYNE2;PLD2;ARHGAP4;SYNE1;FGD2;FGD4;ZMYM1;FGD6;ZMYM4;ZMYM5;EPB41L3;DAG1;PACSIN3;PTK2B;FLNB;WASF3;SUN2;ZRANB1;SUN1;SEMA6A;DMTN;DST;MICAL3;ANK3;FMNL2;BIN1;WDPCP;QRICH1;TNIK;SIPA1;SHANK1
regulation of microtubule-based process (GO:0032886)	12/27	0.000148408	0.0540946	3.11672	27.4756	ATAT1;CAMSAP3;MACF1;CYLD;PHLDB1;APC;MAPT;EFNA5;BICD1;PHLDB2;CLASP1;CLASP2
regulation of microtubule polymerization (GO:0031113)	14/36	0.000238622	0.0676494	2.72713	22.746	NUMA1;DCTN1;DYRK1A;SLAIN2;EML2;CAMSAP3;CLIP1;MAP2;FES;AKAP9;ABL1;MAPT;CLASP1;CDK5RAP2
regulation of G0 to G1 transition (GO:0070316)	15/40	0.000231591	0.0695182	2.62973	22.0123	PHC1;CBX5;CBX3;EHMT2;MGA;PCGF2;EHMT1;CDC7;BRCA1;PHC3;UXT;TFDP1;TFDP2;RHNO1;EZH2
peptidyl-serine modification (GO:0018209)	42/171	0.000231233	0.073749	1.7224	14.4201	SMG1;CAMK2D;PNCK;MAST4;PRKDC;MAST3;ROCK2;PKN3;LRRK2;PRKX;PRKCZ;PKD1;TTBK2;CAMKK2;IKBKB;RPS6KA3;HPF1;CHEK2;AKT2;NTMT1;MKNK1;TLK2;STK38L;CAMK2G;MAP4K1;CSNK1G3;DMPK;PRKCB;PDPK1;DYRK1A;DCLK2;VRK1;CSNK1D;CDC7;DCLK1;MAPKAPK3;MAP3K10;PRKCQ;ATM;CSNK1G1;MAP3K12;ATR
cilium assembly (GO:0060271)	63/289	0.000317357	0.0771178	1.5287	12.3144	CEP126;C2CD3;CEP164;CCP110;KIF17;PTPDC1;CDC14A;IFT52;CNTRL;TCTN1;NEK1;NINL;YWHAG;CDK5RAP2;DYNC2H1;IQCB1;CCDC39;DNAAF3;RFX2;RFX3;KIF24;HAUS3;CSNK1D;OCRL;RPGRIP1L;TMEM80;KIF27;IFT88;FAM161A;IFT81;AKAP9;WDPCP;CEP63;IFT46;SFI1;FAM92A;SDCCAG8;DCTN1;FBF1;RSPH9;SPATA6;TTBK2;ABLIM3;HAUS8;ARL13B;KIF3A;TTC21B;TCTEX1D2;FLNA;NPHP4;FOPNL;DISC1;PCNT;CLASP1;CEP78;PLK4;GSN;CEP152;FUZ;ATAT1;TTLL3;B9D1;CEP89
regulation of extent of cell growth (GO:0061387)	5/6	0.000310867	0.0793177	5.84385	47.1958	OLFM1;CTTN;ABL1;NRCAM;DNM2
regulation of focal adhesion assembly (GO:0051893)	16/45	0.000295625	0.0793987	2.49338	20.2622	MACF1;BCAS3;COL16A1;DMTN;ROCK2;RCC2;EFNA5;VEGFA;CAMSAP3;SLK;ABL1;APOD;PHLDB2;GPM6B;CLASP1;CLASP2
regulation of intracellular signal transduction (GO:1902531)	86/423	0.000357738	0.082979	1.42573	11.3142	ARHGAP9;RPL5;FAM13B;PHF20;EHMT2;LRRK2;ZFAND6;ARAF;ARHGAP1;EHMT1;PRKAG2;ARHGAP39;BRCA1;ARHGAP4;AKAP12;SYDE2;AKAP11;KAT5;EXO1;CHEK2;MCF2L;ARHGDIB;CPNE1;PIP4K2A;IKBKG;FBXO9;VAV3;ARHGEF11;ARHGEF12;TBP;CSNK2A1;PDPK1;STARD8;CSNK2A2;ARHGEF19;ARAP2;OCRL;ARAP1;GMIP;PJA2;VAV2;TTI1;ARHGEF9;RRAGB;MAPT;ARHGEF7;BIRC2;RHNO1;ARHGEF6;BLM;PRKAA2;MEAF6;SGMS1;HDAC1;ARHGAP18;ARHGAP17;RPF2;KALRN;AGER;FGD2;ARHGAP12;FGD…
histone lysine methylation (GO:0034968)	10/22	0.000426729	0.0946783	3.18756	24.7334	KMT2D;PAXIP1;SETD3;SETD6;EHMT2;DOT1L;PRDM5;SETDB2;EZH2;KDM6A
peroxisome fission (GO:0016559)	6/9	0.000476448	0.0972526	4.67508	35.7604	SEC16B;ACOT8;PEX11A;PEX11G;MFF;DNM1L
negative regulation of G0 to G1 transition (GO:0070317)	14/38	0.000459819	0.0977689	2.5836	19.8541	PHC1;CBX5;CBX3;EHMT2;MGA;PCGF2;EHMT1;CDC7;BRCA1;PHC3;UXT;TFDP1;TFDP2;EZH2
regulation of GTPase activity (GO:0043087)	44/189	0.000579274	0.105573	1.63257	12.1687	CD40;DOCK9;LRRK2;ARHGAP1;SNX13;EFNA5;RASIP1;FGD2;SYDE2;FGD4;SIPA1L1;FGD6;RACGAP1;CHN1;SH3BP4;EVI5L;SRGAP2;ECT2;BVES;EVI5;PLXNA3;NDEL1;VAV3;CCL25;BCAS3;SEMA4D;RCC2;OCRL;ARHGAP27;ARAP1;GMIP;VAV2;TBC1D2;DNMBP;SGSM2;RAPGEF1;RAPGEF2;PKP4;ITGA6;ARHGEF7;CPEB2;RAPGEF6;PICALM;EZH2
DNA double-strand break processing (GO:0000729)	9/19	0.000572142	0.108135	3.32177	24.8007	RAD52;BLM;SLX4;KAT5;RNF138;UBE2N;SMARCAD1;ATM;BRCA1
positive regulation of excitatory postsynaptic potential (GO:2000463)	9/19	0.000572142	0.112294	3.32177	24.8007	NLGN3;RIMS1;CUX2;DLG4;GPRIN1;PTK2B;PRKCZ;SHANK3;SHANK1
positive regulation of ion transmembrane transporter activity (GO:0032414)	10/23	0.000658978	0.115957	3.04897	22.3331	TCAF1;ACTN2;WNK1;WNK2;AKAP9;WNK3;WNK4;ANK2;ANK3;CFTR
plasma membrane bounded cell projection assembly (GO:0120031)	53/242	0.000809709	0.137732	1.53582	10.9333	CYFIP1;CEP126;CEP164;PTPDC1;CDC14A;MYLK;IFT52;TCTN1;ARFIP2;NEK1;DYNC2H1;IQCB1;ACTN2;RFX2;RFX3;KIF24;OCRL;KIF27;DNM3;IFT88;FAM161A;IFT81;SPATA13;RAPGEF2;WDPCP;TNIK;ARHGEF7;IFT46;RAPGEF6;FAM92A;ARHGEF6;FBF1;AIF1;TTBK2;FGD2;FGD4;FGD6;ABLIM3;ARL13B;KIF3A;TCTEX1D2;FLNA;FOPNL;PCNT;SRGAP2;DMTN;GSN;FUZ;ATAT1;CCDC88A;TTLL3;B9D1;CEP89
Prom
Term	Overlap	P-value	Adjusted P-value	Odds Ratio	Combined Score	Genes
protein phosphorylation (GO:0006468)	88/471	1.66155e-05	0.0423946	1.55115	17.0707	DDR1;DYRK2;GMFG;LRRK2;PIK3CB;PKD1;IKBKB;RPS6KA3;PPP3CB;SLK;EFEMP1;RPS6KA5;EEF2K;AKT2;FASTK;TLK2;ERC1;JAK3;MAP3K7;ACVR1;MAP4K1;CDKL3;CSNK2A1;SYK;PRKCB;DYRK1A;PHKA1;CSNK1D;TYK2;PHKA2;ERN1;LATS1;ILF3;MELK;MAPKAPK3;DGKQ;RARA;SIK3;BIRC6;SGK3;TNIK;ERG;SIK2;CSNK1G1;CAMK2D;PNCK;PRKDC;PKN3;SRC;WNK4;PRKX;PRKCZ;NUAK1;STK36;MKNK1;ABL2;STK38L;PTK2B;MAP4K5;FNIP2;MAP4K3;MARK2;SRPK2;CDK19;DMPK;DCLK2;CDC7;EIF2AK4…
regulation of microtubule-based process (GO:0032886)	12/27	2.7498e-05	0.0467742	3.68987	38.7488	ATAT1;CAMSAP3;MACF1;DIAPH1;PHLDB1;APC;MAPT;EFNA5;BICD1;PHLDB2;HDAC6;CLASP1
phosphorylation (GO:0016310)	76/387	1.03917e-05	0.0530291	1.63041	18.7081	PANK2;DGKD;DYRK2;GMFG;DGKA;LRRK2;PIK3CB;IKBKB;RPS6KA3;PPP3CB;RPS6KA5;FASTK;TLK2;JAK3;XYLB;ACVR1;MAP4K1;CDKL3;CSNK2A1;SYK;PRKCB;DYRK1A;PHKA1;CSNK1D;TYK2;PHKA2;ERN1;LATS1;ILF3;MELK;DGKQ;RARA;SIK3;BIRC6;SGK3;TNIK;ERG;SIK2;DGKI;RBKS;CAMK2D;PRKDC;PKN3;PNKP;WNK4;PRKCZ;NUAK1;FGGY;STK36;MKNK1;ATP5D;STK38L;PTK2B;MAP4K5;FNIP2;MAP4K3;MARK2;SRPK2;CDK19;SURF1;DMPK;EIF2AK4;DCLK1;CDK8;TEC;RPS6KB1;STK25;WNK1;WNK…
regulation of microtubule polymerization (GO:0031113)	13/36	0.000170696	0.174213	2.99802	26.0097	NUMA1;DCTN1;DYRK1A;SLAIN2;CAMSAP1;EML2;CAMSAP3;CLIP1;MAP2;AKAP9;MAPT;CLASP1;CDK5RAP2
positive regulation of ion transmembrane transporter activity (GO:0032414)	10/23	0.000162724	0.207595	3.60965	31.4886	TCAF1;TRPC6;ACTN2;WNK1;WNK2;AKAP9;WNK3;WNK4;ANK2;ANK3
regulation of focal adhesion assembly (GO:0051893)	14/45	0.000572319	0.243379	2.58291	19.2835	MACF1;BCAS3;COL16A1;DMTN;SRC;EFNA5;PTK2;VEGFA;CAMSAP3;SLK;DLC1;PHLDB2;GPM6B;CLASP1
modulation of excitatory postsynaptic potential (GO:0098815)	10/26	0.000537252	0.249236	3.19315	24.0414	NLGN3;RIMS2;RIMS1;CUX2;LRRK2;NRXN1;GPRIN1;TMEM108;PTK2B;PRKCZ
cytoplasmic microtubule organization (GO:0031122)	15/49	0.000446853	0.253366	2.54149	19.6032	NUMA1;FIGN;SLAIN2;WDR73;CAMSAP1;CAMSAP3;CCDC88A;DLG1;SLK;KATNAL2;FIGNL1;TRPV4;MAPT;TUBGCP4;CLASP1
ciliary basal body-plasma membrane docking (GO:0097711)	24/97	0.000405872	0.258896	2.05415	16.0418	IQCB1;C2CD3;DCTN1;CEP152;FBF1;CEP164;KIF24;HAUS3;CSNK1D;RPGRIP1L;HAUS2;AKAP9;NPHP1;CNTRL;TCTN1;NPHP4;B9D1;CEP63;PCNT;NINL;SFI1;CLASP1;CDK5RAP2;CEP78
peptidyl-serine phosphorylation (GO:0018105)	32/146	0.000526691	0.26877	1.81966	13.7364	CAMK2D;PNCK;PRKDC;PKN3;LRRK2;PRKX;PRKCZ;PKD1;IKBKB;RPS6KA3;AKT2;MKNK1;TLK2;STK38L;MAP4K1;DMPK;PRKCB;DYRK1A;DCLK2;CSNK1D;CDC7;DCLK1;MAPK12;ERN1;LATS1;MAPKAPK3;DGKQ;MAP3K10;ATM;SGK3;CSNK1G1;MAP3K12
microtubule nucleation (GO:0007020)	8/17	0.000388467	0.283193	3.90692	30.6822	GOLGA2;AKAP9;SLAIN2;CSNK1D;TUBG2;TUBGCP4;CLASP1;NDEL1
regulation of cell-substrate junction assembly (GO:0090109)	7/15	0.00097199	0.310004	3.87436	26.8732	CAMSAP3;MACF1;SLK;EFNA5;PTK2;GPM6B;CLASP1
cilium assembly (GO:0060271)	55/289	0.000372932	0.317179	1.58	12.4727	C2CD3;CEP164;KIF17;PTPDC1;CDC14B;IFT52;CNTRL;TCTN1;DZIP1L;BBS9;NINL;CDK5RAP2;DYNC2H1;IQCB1;CCDC39;DNAAF3;RFX2;KIF24;HAUS3;CSNK1D;RPGRIP1L;TMEM80;KIF27;HAUS2;FAM161A;IFT81;AKAP9;WDPCP;CEP63;BBOF1;IFT46;SFI1;FAM92A;INTU;DCTN1;FBF1;SPATA6;HDAC6;ABLIM3;ARL13B;STK36;TTC21B;NPHP1;NPHP4;FOPNL;PCNT;PIBF1;CLASP1;CEP78;GSN;CEP152;FUZ;ATAT1;TTLL3;B9D1
regulation of microtubule cytoskeleton organization (GO:0070507)	9/23	0.000880472	0.320932	3.24869	22.8547	CAMSAP3;ATAT1;PHLDB1;MAPT;EFNA5;BICD1;PHLDB2;CLASP1;SKA2
positive regulation of excitatory postsynaptic potential (GO:2000463)	8/19	0.000967133	0.329019	3.49566	24.264	NLGN3;RIMS2;RIMS1;CUX2;NRXN1;GPRIN1;PTK2B;PRKCZ
regulation of cytoskeleton organization (GO:0051493)	23/96	0.000858893	0.337149	1.98907	14.0426	EPHA5;PHLDB1;DMTN;HIP1R;NEXN;STMN4;ARHGAP17;EFNA5;BAIAP2;BICD1;SORBS3;PTK2;ATAT1;CAMSAP3;DIAPH1;CCDC88A;DLC1;CDK10;MAPT;PHLDB2;CLASP1;GPM6B;MARK2
age, layer, and prom genes
Term	Overlap	P-value	Adjusted P-value	Odds Ratio	Combined Score	Genes
positive regulation of ion transmembrane transporter activity (GO:0032414)	9/23	3.68586e-06	0.00940446	6.52718	81.6616	TCAF1;ACTN2;WNK1;WNK2;AKAP9;WNK3;WNK4;ANK2;ANK3
protein modification process (GO:0036211)	17/85	9.81713e-06	0.0166989	3.33611	38.47	CDKL3;UBE2I;PRKDC;ARAF;PLOD2;WDYHV1;PHKA2;GNMT;DUSP12;PPP4R2;GGCX;AKT2;UBE2N;UBA3;ABL2;ST3GAL6;BAP1
phosphorylation (GO:0016310)	47/387	3.28143e-06	0.0167451	2.02581	25.5803	PANK2;CAMK2D;DGKD;PRKDC;DGKA;LRRK2;PNKP;WNK4;IKBKB;RPS6KA3;NUAK1;PPP3CB;FGGY;FASTK;MKNK1;TLK2;PTK2B;JAK3;FNIP2;XYLB;MAP4K3;MARK2;SRPK2;MAP4K1;CDKL3;CSNK2A1;DMPK;PRKCB;PHKA1;CSNK1D;PHKA2;MELK;TEC;RPS6KB1;STK25;WNK1;WNK2;WNK3;AAK1;SIK3;BIRC6;ATM;CDK12;TNIK;ERG;DGKI;FGFR1
protein phosphorylation (GO:0006468)	52/471	1.58594e-05	0.0202326	1.84159	20.3528	DDR1;LRRK2;PKD1;IKBKB;RPS6KA3;PPP3CB;SLK;AKT2;FASTK;TLK2;ERC1;JAK3;MAP3K7;MAP4K1;CDKL3;CSNK2A1;PRKCB;PHKA1;CSNK1D;PHKA2;MELK;MAPKAPK3;SIK3;BIRC6;TNIK;ERG;CSNK1G1;CAMK2D;PRKDC;WNK4;NUAK1;MKNK1;ABL2;PTK2B;FNIP2;MAP4K3;MARK2;SRPK2;DMPK;DCLK2;CDC7;TEC;RPS6KB1;STK25;WNK1;WNK2;WNK3;AAK1;ATM;CDK12;FGFR3;FGFR1
regulation of microtubule polymerization (GO:0031113)	10/36	3.49702e-05	0.0356906	4.63349	47.5443	CAMSAP3;CLIP1;NUMA1;DCTN1;MAP2;AKAP9;SLAIN2;MAPT;CLASP1;EML2
positive regulation of microtubule polymerization or depolymerization (GO:0031112)	8/25	7.03667e-05	0.0598469	5.33778	51.0387	CLIP1;NUMA1;DCTN1;TRPV4;AKAP9;SLAIN2;MAPT;CLASP1
cytoplasmic microtubule organization (GO:0031122)	11/49	0.000121278	0.0884116	3.74462	33.7668	CAMSAP3;CCDC88A;DLG1;SLK;NUMA1;KATNAL2;FIGNL1;TRPV4;SLAIN2;MAPT;CLASP1
regulation of ion transmembrane transporter activity (GO:0032412)	10/43	0.000179773	0.091738	3.8792	33.4535	TCAF2;TCAF1;WNK1;WNK2;FHL1;WNK3;WNK4;FXYD7;CACNA1D;ANK2
regulation of protein localization to cell cortex (GO:1904776)	4/6	0.000174855	0.0991431	11.1204	96.2085	GPSM2;NUMA1;EPB41;EPB41L2
microtubule polymerization (GO:0046785)	8/28	0.000172129	0.109797	4.76588	41.3071	GOLGA2;TRPV4;AKAP9;SLAIN2;CSNK1D;MAPT;CLASP1;NDEL1
vesicle-mediated transport (GO:0016192)	43/411	0.000276589	0.128312	1.74517	14.2981	NAPB;TMEM87B;DCTN1;LRRK2;WIPF3;GCC2;MIA3;AGAP3;LRP8;KALRN;STX11;CUX2;MICALL1;CPNE1;ATP6V1H;KIF1B;ERC1;KIF1A;GPRASP1;EVI5;RAB11FIP3;VPS39;BCAS3;GIT2;ARFGEF2;SCRIB;TVP23A;CSNK1D;MAPK8IP3;ARFGAP1;DNM1;SYTL2;DNM2;DNM3;PIKFYVE;SNX16;BIN1;KXD1;RIN3;OSBPL1A;SFT2D1;CSNK1G1;SEC22C
microtubule nucleation (GO:0007020)	6/17	0.000319759	0.135978	5.88726	47.3803	GOLGA2;AKAP9;SLAIN2;CSNK1D;CLASP1;NDEL1
regulation of actin cytoskeleton reorganization (GO:2000249)	8/31	0.000372035	0.146038	4.30466	33.9919	BCAS3;BAIAP2L2;HAX1;NTF3;ARHGDIB;ABL2;PTK2B;BAIAP2
regulation of microtubule polymerization or depolymerization (GO:0031110)	6/18	0.000455416	0.154933	5.56019	42.7818	CAMSAP3;MAP2;MAP1A;MAPT;CLASP1;SKA2
positive regulation of microtubule polymerization (GO:0031116)	7/25	0.000505342	0.161173	4.67056	35.4508	CLIP1;NUMA1;DCTN1;AKAP9;SLAIN2;MAPT;CLASP1
establishment of mitotic spindle localization (GO:0040001)	6/18	0.000455416	0.165999	5.56019	42.7818	GPSM2;NUMA1;ESPL1;DCTN1;CLASP1;NDEL1
protein autophosphorylation (GO:0046777)	22/176	0.000870029	0.261162	2.08507	14.6935	DDR1;MAP4K1;CAMK2D;LRRK2;SLK;MELK;TEC;MAPKAPK3;STK25;WNK2;MKNK1;WNK3;AAK1;ABL2;PTK2B;ATM;TNIK;CDK12;FGFR3;JAK3;MARK2;FGFR1
stress-activated protein kinase signaling cascade (GO:0031098)	12/71	0.00097469	0.276324	2.81925	19.547	IKBKB;MAP4K1;SLK;FBXW11;STK25;NRK;CUL1;IKBKG;TNIK;MAP3K7;MAP3K4;MAP4K3

## Sheet: GO_Molecular_Function_2018
age
Term	Overlap	P-value	Adjusted P-value	Odds Ratio	Combined Score	Genes
microtubule binding (GO:0008017)	60/196	3.34456e-08	3.84959e-05	2.01529	34.6899	NUMA1;MTCL1;FMR1;LRRK2;GOLGA2;POLB;OPA1;KIF21A;KIF1B;KIF1A;DNM1L;CDK5RAP2;NDEL1;DST;SGIP1;STARD9;KIF24;KIF23;MID1;EML2;KIF27;DNM1;DNM2;EML4;DNM3;EML5;CLIP1;KIFC2;STIM1;FAM161A;NAV3;CEP57L1;KIFC1;MAP1A;MAPRE3;MAPT;KIFC3;KIF20B;SAXO1;DCTN1;CAMSAP1;TTBK2;SKA2;MAP2;KIF3A;MAP6;MAP4;WHAMM;CLASP1;CLASP2;HOOK3;CCDC88B;CAMSAP3;CCDC88A;APC;TRPV4;TUBGCP6;FGF13;TPT1;MDM1
tubulin binding (GO:0015631)	68/256	1.63434e-06	0.000940561	1.74868	23.2999	SETD2;NUMA1;MTCL1;FMR1;LRRK2;PDCD5;DIXDC1;STMN4;GOLGA2;POLB;OPA1;STMN1;KIF21A;KIF1B;KIF1A;DNM1L;CDK5RAP2;NDEL1;BCAS3;AGTPBP1;SGIP1;STARD9;KIF24;KIF23;MID1;EML2;KIF27;DNM1;DNM2;EML4;DNM3;EML5;CLIP1;KIFC2;FAM161A;NAV3;CEP57L1;KIFC1;MAP1A;MAPRE3;MAPT;KIFC3;KIF20B;SAXO1;DCTN1;HTT;CAMSAP1;NCALD;SKA2;MAP2;KIF3A;MAP6;MAP4;WHAMM;CLASP1;RAB11FIP5;CLASP2;HOOK3;CCDC88B;AGBL5;CCDC88A;APC;TRPV4;TUBGCP6;FGF13;…
protein serine/threonine kinase activity (GO:0004674)	89/369	3.91561e-06	0.00150229	1.58784	19.7694	DYRK2;MAST4;NRK;LRRK2;ARAF;CCNC;MYLK;IKBKB;RPS6KA3;RPS6KA5;SLK;CHEK2;AKT2;FASTK;TLK2;NEK1;TLK1;MAP3K7;MAP3K4;MAP3K5;MAP4K1;CDKL3;MAP2K4;CSNK1G3;CSNK2A1;SYK;PRKCB;PDPK1;MINK1;CSNK1D;VRK1;TGFBR1;MELK;LATS2;MAPKAPK3;SIK3;MAPKAPK5;SIK2;PRKD1;TNIK;ALPK1;CSNK1G1;CAMK2D;PRKDC;ROCK2;PELI2;WNK4;PRKCZ;TTBK2;NUAK1;STK33;MKNK1;PHKG2;STK38L;PTK2B;MAP4K5;MAP2K7;MARK3;MAP4K3;MAP2K5;MARK2;MAPK4;MAP4K4;SRPK2;CDK1…
protein kinase activity (GO:0004672)	112/514	3.53558e-05	0.0081389	1.43449	14.7036	EPHB6;NRK;ARAF;CCNC;FGF5;RPS6KA3;SLK;RPS6KA5;AKT2;CHEK2;NEK1;MAP3K7;MAP3K4;MAP3K5;EPHA5;CDKL3;MAP2K4;CSNK1G3;CSNK2A1;PRKCB;VRK1;CSNK1D;MELK;MAPKAPK3;SIK3;MAPKAPK5;PRKD1;TNIK;SIK2;ALPK1;CSNK1G1;PRKDC;WNK4;PKMYT1;PRKCZ;CSF2RA;TTBK2;STK33;NUAK1;GRK4;ABL1;ABL2;STK38L;MAP2K7;MARK3;MAP2K5;MARK2;SRPK2;STAT5A;DMPK;TNK2;DCLK2;CDC7;ERLIN2;EIF2AK4;CLK4;CDK8;STK25;WNK1;WNK2;WNK3;CDK1;AAK1;ATM;CDK12;MAP3K14;F…
MAP kinase kinase kinase kinase activity (GO:0008349)	8/11	3.00873e-05	0.00865761	4.78784	49.8481	MAP4K1;STK25;NRK;MINK1;TNIK;MAP4K5;MAP4K3;MAP4K4
microtubule plus-end binding (GO:0051010)	8/13	0.000176086	0.0289536	4.05125	35.0212	CLIP1;DST;NUMA1;APC;STIM1;CLASP1;TTBK2;CLASP2
phosphotransferase activity, alcohol group as acceptor (GO:0016773)	61/255	0.000155282	0.0297883	1.57482	13.8116	PANK2;DGKD;DGKA;LRRK2;ARAF;PIK3CB;PIK3C2A;KHK;IKBKB;RPS6KA3;RPS6KA5;EEF2K;NEK1;MAP3K7;XYLB;MAP3K5;MAP4K1;CDKL3;MAP2K4;CSNK1G3;SYK;MINK1;CSNK1D;VRK1;COASY;TGFBR1;PKM;FAM20B;FAM20A;TNIK;DGKI;PRKDC;SRC;PKMYT1;PRKCZ;TTBK2;PAPSS1;GK5;FGGY;ABL1;ABL2;MAP4K5;MAP4K3;MAP2K5;IP6K2;CHKA;GK;CDC7;GTF2H1;GTF2H2;CDK8;RPS6KB1;WNK1;STK25;WNK3;CDK1;CDK12;PI4KB;MAP3K14;ATR;MAP3K12
miRNA binding (GO:0035198)	11/25	0.000547533	0.0630211	2.89664	21.754	ZC3H10;ZC3H7A;AGO3;AGO4;FMR1;HNRNPA2B1;MATR3;HNRNPA1;PUM1;RBM10;PUM2
kinase activity (GO:0016301)	64/281	0.000462714	0.066573	1.49939	11.513	PANK2;DGKD;DGKA;LRRK2;ARAF;PIK3CB;PIK3C2A;IKBKB;RPS6KA3;RPS6KA5;EEF2K;PPIP5K1;PPIP5K2;CHEK2;NEK1;MAP3K7;MAP3K5;MAP4K1;CDKL3;MAP2K4;CSNK1G3;CSNK2A1;SYK;PDPK1;MINK1;CSNK1D;VRK1;COASY;TGFBR1;PRKD1;TNIK;DGKI;PRKDC;SRC;PKMYT1;PRKCZ;TTBK2;PAPSS1;GK5;ABL1;PGK1;ABL2;MAP4K5;MAP4K3;MAP2K5;MAP4K4;IP6K2;CHKA;GK;CDC7;GTF2H1;GTF2H2;CDK8;RPS6KB1;WNK1;STK25;WNK3;CDK1;ATM;CDK12;PI4KB;MAP3K14;ATR;MAP3K12
ubiquitin-like protein-specific protease activity (GO:0019783)	23/75	0.000529573	0.0677265	2.01887	15.2292	USP13;USP37;ZRANB1;USP5;PSMD14;USP4;USP10;USP21;USP33;USP34;OTUD7B;WDR20;JOSD2;USP29;SENP1;SENP6;SENP5;OTUD6B;SENP8;TADA3;USP1;USP30;BAP1
histone-lysine N-methyltransferase activity (GO:0018024)	15/42	0.000849905	0.0889309	2.35117	16.6237	KMT2E;KMT2D;SUV39H2;SETD2;PRDM9;SETD3;EED;KMT2C;EHMT2;DOT1L;SETDB2;EHMT1;MECOM;KMT5A;EZH2
layer (Ect_vs_Mes)
Term	Overlap	P-value	Adjusted P-value	Odds Ratio	Combined Score	Genes
protein serine/threonine kinase activity (GO:0004674)	101/369	2.61224e-11	3.00669e-08	1.91944	46.7735	CCNT1;CCNH;NRK;ARAF;CCNC;MYLK;RPS6KA3;RPS6KA5;SLK;CHEK2;AKT2;NEK1;NEK3;MAP3K7;MAP3K4;MAP3K5;ACVR1;CDKL2;CDKL3;MAP2K4;CSNK1G3;CSNK2A1;PRKCB;DYRK1A;CSNK1D;VRK1;MELK;MAPKAPK3;SIK3;ULK2;PRKCQ;TNIK;ALPK1;CSNK1G1;PRKDC;WNK4;PRKCZ;TTBK2;NUAK1;IRAK1;STK38L;MARK3;MAP2K5;MARK2;PLK4;SRPK2;DMPK;NEK4;EIF2AK1;DCLK2;CDC7;EIF2AK4;CLK4;DCLK1;CLK2;CLK1;WNK1;STK25;WNK2;WNK3;AAK1;CDK10;MAP3K10;ATM;CDK12;MAP3K14;ATR;…
microtubule binding (GO:0008017)	61/196	1.11282e-09	6.40429e-07	2.1825	44.9952	NUMA1;MTCL1;LRRK2;KIF17;UXT;GOLGA2;POLB;KIF21A;KIF1B;KIF21B;KIF1A;DNM1L;CDK5RAP2;NDEL1;SUN2;DST;SGIP1;MTUS2;KIF24;KIF23;MID1;EML2;KIF27;DNM1;DNM2;EML4;DNM3;EML5;CLIP1;KIFC2;STIM1;FAM161A;CEP57L1;KIFC1;KIF16B;MAP1A;MAPRE3;MAPT;KIFC3;KIF20B;GAPDH;MACF1;DCTN1;TTBK2;SKA2;RACGAP1;HAUS8;MAP2;KIF3A;MAP4;CLASP1;CLASP2;RCC2;CAMSAP3;CCDC88A;HOOK2;APC;TRPV4;FGF13;TPT1;MDM1
protein kinase activity (GO:0004672)	120/514	1.68679e-08	6.47167e-06	1.63719	29.3022	CCNT1;NRK;ARAF;CCNC;RPS6KA3;SLK;RPS6KA5;AKT2;CHEK2;FGFR1OP2;NEK1;NEK3;MAP3K7;MAP3K4;MAP3K5;CDKL2;ACVR1;PDGFRB;CDKL3;MAP2K4;CSNK1G3;CSNK2A1;PRKCB;DYRK1A;VRK1;CSNK1D;MELK;MAPKAPK3;SIK3;ULK2;PRKCQ;TNIK;ALPK1;CSNK1G1;PRKDC;WNK4;PKMYT1;PRKCZ;TTBK2;NUAK1;IRAK1;GRK4;ABL1;ABL2;STK38L;MARK3;MAP2K5;MARK2;PLK4;SRPK2;STAT5A;DMPK;NEK4;TNK2;DCLK2;CDC7;ERLIN2;EIF2AK4;CLK4;DCLK1;CLK2;CLK1;TBCK;STK25;WNK1;FES;WNK…
tubulin binding (GO:0015631)	66/256	7.59915e-07	0.000145777	1.80794	25.474	NUMA1;MTCL1;LRRK2;DIXDC1;BRCA1;KIF17;UXT;GOLGA2;POLB;DAG1;KIF21A;KIF1B;KIF21B;KIF1A;DNM1L;CDK5RAP2;NDEL1;SUN2;BCAS3;AGTPBP1;SGIP1;MTUS2;KIF24;KIF23;MID1;EML2;KIF27;DNM1;DNM2;EML4;DNM3;EML5;CLIP1;KIFC2;FAM161A;IFT81;CEP57L1;KIFC1;KIF16B;MAP1A;MAPRE3;MAPT;KIFC3;KIF20B;ALDOA;GAPDH;DCTN1;SKA2;RACGAP1;HAUS8;MAP2;KIF3A;MAP4;CLASP1;CLASP2;RCC2;AGBL5;CCDC88A;TTLL4;HOOK2;APC;TRPV4;FGF13;DNAL1;TPT1;MDM1
kinase activity (GO:0016301)	71/281	6.68952e-07	0.000153993	1.77187	25.1917	PANK2;SMG1;DGKD;PANK1;DGKA;LRRK2;ARAF;PIK3C2G;IKBKB;RPS6KA3;NADK2;RPS6KA5;EEF2K;PPIP5K1;PPIP5K2;CHEK2;NEK1;MAP3K7;MAP3K5;ACVR1;MAP4K1;CDKL2;CDKL3;MAP2K4;CSNK1G3;CSNK2A1;SYK;PDPK1;MINK1;DYRK1A;CSNK1D;VRK1;COASY;PRKCQ;TNIK;DGKI;PRKAA2;PRKDC;PKN3;PKMYT1;PRKCZ;TTBK2;GK5;IRAK1;ABL1;ABL2;HMGXB3;MAP4K3;MAP2K5;MAP4K4;IP6K2;CHKA;GK;MOK;CDC7;GTF2H1;GTF2H2;DCLK1;TBCK;RPS6KB1;WNK1;STK25;WNK3;MAP3K10;ATM;CDK1…
phosphotransferase activity, alcohol group as acceptor (GO:0016773)	66/255	6.53778e-07	0.000188125	1.81503	25.847	PANK2;SMG1;DGKD;PANK1;DGKA;LRRK2;ARAF;PIK3C2G;KHK;IKBKB;RPS6KA3;NADK2;RPS6KA5;EEF2K;NEK1;MAP3K7;XYLB;MAP3K5;ACVR1;MAP4K1;CDKL2;CDKL3;MAP2K4;CSNK1G3;SYK;MINK1;DYRK1A;CSNK1D;VRK1;COASY;PKM;PRKCQ;TNIK;DGKI;PRKAA2;PRKDC;PKN3;PKMYT1;PRKCZ;TTBK2;GK5;FGGY;IRAK1;ABL1;ABL2;MAP4K3;MAP2K5;IP6K2;CHKA;GK;MOK;CDC7;GTF2H1;GTF2H2;DCLK1;TBCK;RPS6KB1;WNK1;STK25;WNK3;MAP3K10;CDK12;PI4KB;MAP3K14;ATR;MAP3K12
miRNA binding (GO:0035198)	12/25	5.85791e-05	0.00842807	3.36606	32.8027	RBM4;ZC3H10;PNPT1;ZC3H7A;AGO3;AGO4;HNRNPA2B1;MATR3;HNRNPA1;PUM1;RBM10;PUM2
phosphatidylinositol-3,5-bisphosphate phosphatase activity (GO:0106018)	9/15	5.32463e-05	0.00875521	4.20757	41.405	MTMR1;MTMR2;PIKFYVE;MTMR3;MTMR14;OCRL;SYNJ2;MTMR4;MTM1
GTPase regulator activity (GO:0030695)	63/276	8.1229e-05	0.0103883	1.60071	15.0758	ARHGAP9;GPSM2;DOCK4;FAM13B;LRRK2;ARHGAP1;ARHGAP39;ARHGAP4;SYDE2;RIMS1;SYNGAP1;EVI5L;DNM1L;TBC1D22A;TBC1D22B;VAV3;STARD8;APLP2;ARAP2;OCRL;ARAP1;GMIP;RANGAP1;ARFGAP1;ARFGAP2;ACAP3;TBC1D2;RASA2;RAPGEF2;TBC1D25;DEPDC5;RIN2;ARHGEF6;NPRL3;ARHGAP18;ARHGAP17;AGAP3;KALRN;ARHGAP12;RIC8A;RIC8B;RACGAP1;CHN1;TBC1D13;SH3BP4;BNIP2;STXBP5;RGS22;A2M;SRGAP2;ECT2;EVI5;GIT2;TNK2;ARHGAP29;MYO9B;ARHGAP27;MYO9A;ARHGAP3…
microtubule plus-end binding (GO:0051010)	8/13	0.000111283	0.0128087	4.31546	39.2855	CLIP1;DST;NUMA1;APC;STIM1;CLASP1;TTBK2;CLASP2
phosphatidylinositol binding (GO:0035091)	29/101	0.000124254	0.0130015	2.01353	18.108	DENND1C;SCARB1;NUMA1;EPB41;PITPNB;DENND1A;ITPR1;TULP4;SNX13;NOXO1;MTM1;ZFYVE28;SH3PXD2A;MCF2L;SNX5;PLEKHA1;HIP1R;RUNDC3B;CCDC88A;ZFYVE16;SNX16;FES;PARD3;DPEP1;MPPE1;MAPT;AIDA;C2CD2L;PICALM
Rab guanyl-nucleotide exchange factor activity (GO:0017112)	18/52	0.000186652	0.0153455	2.42745	20.8427	DENND1C;ANKRD27;DENND5B;DENND1A;DENND4C;DENND3;TRAPPC9;RABGEF1;ALS2CL;TRAPPC6B;ST5;MADD;RIN3;DENND6B;TRAPPC13;SBF1;SBF2;RIN2
Ras GTPase binding (GO:0017016)	45/185	0.000179221	0.0158679	1.70577	14.7155	DENND1C;MAPKAP1;DENND1A;LRRK2;CLEC16A;RHOBTB3;ARHGAP1;CIB1;BICD1;YBX3;STRN3;RIMS1;RABGEF1;RUSC2;TMEM127;KIF3A;MICALL1;TBC1D13;SH3BP4;FLNA;STXBP5;EVI5L;ERC1;DNM1L;TBC1D22A;RAB11FIP3;EVI5;TBC1D22B;ANKRD27;HACE1;YIPF2;RANBP17;MYO5A;NUTF2;MYO9B;RABGGTB;RANGAP1;TBCK;TBC1D2;SGSM2;PIH1D2;TBC1D25;RIN3;RAPGEF6;PICALM
GTPase activator activity (GO:0005096)	57/250	0.000178332	0.017105	1.59888	13.8013	ARHGAP9;DOCK4;FAM13B;LRRK2;ARHGAP1;ARHGAP39;ARHGAP4;SYDE2;SYNGAP1;EVI5L;DNM1L;TBC1D22A;TBC1D22B;VAV3;STARD8;APLP2;ARAP2;OCRL;ARAP1;GMIP;RANGAP1;ARFGAP1;ARFGAP2;ACAP3;TBC1D2;RASA2;RAPGEF2;TBC1D25;DEPDC5;ARHGEF6;NPRL3;ARHGAP18;ARHGAP17;AGAP3;KALRN;ARHGAP12;RIC8A;RIC8B;RACGAP1;CHN1;TBC1D13;BNIP2;STXBP5;RGS22;A2M;SRGAP2;ECT2;EVI5;GIT2;ARHGAP29;MYO9B;ARHGAP27;MYO9A;ARHGAP33;TBCK;SGSM2;SIPA1
MAP kinase kinase kinase kinase activity (GO:0008349)	7/11	0.000231433	0.0177586	4.46258	37.3572	MAP4K1;STK25;NRK;MINK1;TNIK;MAP4K3;MAP4K4
phosphatidylinositol-3,5-bisphosphate 3-phosphatase activity (GO:0052629)	7/12	0.000486917	0.0350276	4.0907	31.2014	MTMR1;MTMR2;MTMR3;MTMR14;SYNJ2;MTMR4;MTM1
motor activity (GO:0003774)	24/86	0.000722795	0.0489374	1.95701	14.1539	DYNC2H1;DNAH1;MYO10;KIF24;MYO5A;KIF23;MYO9B;MYO7A;KLC1;KIF17;KIF27;MYL6;MYO1B;KIFC2;KIF16B;KIFC1;KIF3A;MYO6;KIF1B;KIF21A;KIF1A;KIF21B;KIFC3;KIF20B
guanylate kinase activity (GO:0004385)	7/13	0.000925159	0.0560452	3.77603	26.3776	MPP3;DLG1;DLG4;MAGI3;CASK;SCRIB;KIF20B
calmodulin-dependent protein kinase activity (GO:0004683)	11/28	0.000998336	0.0574543	2.75496	19.0352	CAMK2D;PNCK;EEF2K;MAPKAPK3;MKNK1;PTK2B;PHKB;PHKA1;CAMK2G;PHKA2;CAMKK2
ionotropic glutamate receptor binding (GO:0035255)	7/13	0.000925159	0.0591588	3.77603	26.3776	DLG1;DLG4;GNAS;SCRIB;SHANK3;SHISA7;SHANK1
prom
Term	Overlap	P-value	Adjusted P-value	Odds Ratio	Combined Score	Genes
microtubule binding (GO:0008017)	52/196	2.21853e-08	2.55353e-05	2.20262	38.8187	NUMA1;LRRK2;KIF17;KIF15;GOLGA2;KIF1B;KIF1A;CDK5RAP2;NDEL1;DST;SGIP1;KIF24;KIF23;MID1;EML2;KIF27;DNM1;DNM2;EML4;DNM3;EML5;CLIP1;KIFC2;STIM1;FAM161A;CEP57L1;KIFC1;KIF16B;MAP1A;MAPRE3;MAPT;KIFC3;GAPDH;MACF1;RGS14;DCTN1;CAMSAP1;HDAC6;SKA2;BCL2L11;RACGAP1;MAP2;MAP6;MAP4;CLASP1;CAMSAP3;CCDC88A;APC;TRPV4;TUBGCP4;TPT1;MDM1
tubulin binding (GO:0015631)	57/256	2.76289e-06	0.00159004	1.84854	23.6599	SETD2;NUMA1;LRRK2;DIXDC1;STMN4;KIF17;KIF15;GOLGA2;KIF1B;KIF1A;CDK5RAP2;NDEL1;BCAS3;SGIP1;KIF24;KIF23;MID1;EML2;KIF27;DNM1;DNM2;EML4;DNM3;EML5;CLIP1;KIFC2;FAM161A;IFT81;CEP57L1;KIFC1;KIF16B;MAP1A;MAPRE3;MAPT;KIFC3;GAPDH;RGS14;DCTN1;CAMSAP1;NCALD;HDAC6;SKA2;BCL2L11;RACGAP1;MAP2;MAP6;MAP4;CLASP1;RAB11FIP5;AGBL5;CCDC88A;APC;TRPV4;TUBGCP4;DNAL1;TPT1;MDM1
protein serine/threonine kinase activity (GO:0004674)	69/369	0.00012654	0.0485491	1.55244	13.9331	DYRK2;NRK;LRRK2;ARAF;CCNC;IKBKB;RPS6KA3;RPS6KA5;SLK;AKT2;FASTK;TLK2;MAP3K7;MAP3K4;ACVR1;MAP4K1;CDKL3;CSNK2A1;SYK;PRKCB;DYRK1A;CSNK1D;ERN1;LATS1;MELK;MAPKAPK3;SIK3;SGK3;SIK2;TNIK;CSNK1G1;CAMK2D;PNCK;PRKDC;PKN3;PELI2;WNK4;PRKCZ;NUAK1;STK36;MKNK1;STK38L;PTK2B;MAP4K5;MAP4K3;MARK2;SRPK2;CDK19;DMPK;MOK;DCLK2;CDC7;EIF2AK4;GTF2H2;CLK4;DCLK1;MAPK12;CDK8;RPS6KB1;WNK1;STK25;WNK2;WNK3;AAK1;CDK10;MAP3K10;ATM;…
protein kinase activity (GO:0004672)	89/514	0.000250961	0.072214	1.43754	11.9175	DDR1;DYRK2;LRRK2;NRK;ARAF;CCNC;IKBKB;FGF5;RPS6KA3;SLK;RPS6KA5;EEF2K;AKT2;FASTK;FGFR1OP2;CNTRL;TLK2;JAK3;MAP3K7;MAP3K4;ACVR1;EPHA5;MAP4K1;CDKL3;CSNK2A1;SYK;PRKCB;DYRK1A;NRG1;CSNK1D;TYK2;ERN1;LATS1;MELK;MAPKAPK3;IL3RA;SIK3;SGK3;TNIK;SIK2;CSNK1G1;CAMK2D;PNCK;PRKDC;PKN3;SRC;PELI2;WNK4;PKMYT1;PRKCZ;CSF2RA;NUAK1;STK36;MKNK1;ABL2;STK38L;PTK2B;MAP4K5;MAP4K3;MARK2;SRPK2;DMPK;EGF;MOK;DCLK2;CDC7;ERLIN2;EIF2…
phosphotransferase activity, alcohol group as acceptor (GO:0016773)	50/255	0.000328371	0.0755909	1.62788	13.0578	PANK2;DGKD;DGKA;LRRK2;ARAF;PIK3C2G;PIK3CB;KHK;IKBKB;RPS6KA3;RPS6KA5;EEF2K;MAP3K7;XYLB;ACVR1;MAP4K1;CDKL3;SYK;DYRK1A;CSNK1D;PKM;DGKQ;SGK3;TNIK;DGKI;RBKS;PRKDC;PKN3;SRC;PKMYT1;PRKCZ;FGGY;ABL2;MAP4K5;MAP4K3;IP6K2;MOK;CDC7;GTF2H2;DCLK1;PTK2;CDK8;RPS6KB1;WNK1;ETNK2;STK25;WNK3;MAP3K10;CDK12;MAP3K12
MAP kinase kinase kinase kinase activity (GO:0008349)	6/11	0.000816976	0.156723	4.52847	32.197	MAP4K1;STK25;NRK;TNIK;MAP4K5;MAP4K3
age only genes
Term	Overlap	P-value	Adjusted P-value	Odds Ratio	Combined Score	Genes
poly-purine tract binding (GO:0070717)	8/20	9.59812e-06	0.0110474	6.77392	78.2655	TIA1;RBPMS;FMR1;MCRS1;PABPC4;HNRNPU;ZC3H14;RBMS3
pre-mRNA binding (GO:0036002)	9/31	5.2254e-05	0.0300722	4.91656	48.4743	HNRNPL;PTBP1;PRPF39;CELF3;CELF4;HNRNPU;U2AF1;SRSF6;TARBP2
poly(A) binding (GO:0008143)	6/14	8.33264e-05	0.0319696	7.25777	68.1704	TIA1;RBPMS;PABPC4;HNRNPU;ZC3H14;RBMS3
RNA binding (GO:0003723)	112/1388	0.000414746	0.119343	1.3665	10.6421	EIF4A1;SRP19;DBR1;FMR1;HNRNPU;PARK7;NUDT5;TIAL1;RIMS1;ALKBH1;FBRSL1;LUC7L;UBAP2L;SLC16A3;RARS2;METTL3;FNDC3B;ATXN2L;SARNP;RPL27;ERH;MATR3;SREK1;SRSF6;PPIA;KMT2C;ZCCHC9;ATXN2;G3BP1;ERI3;G3BP2;SAFB2;MAP4;ZC3H14;RBM10;MARK2;SMAD2;TIA1;RBPMS;HELZ;EIF2AK4;MRPL23;LSM5;PUM1;EIF2S2;HARS2;PUM2;HNRNPL;DIAPH1;HNRNPK;CNOT1;RPL27A;RNPS1;DCP1A;CPEB2;EIF4G3;DCP1B;YWHAE;RBM26;FASTKD2;FASTKD3;CELF3;CELF4;ELAVL4;Z…
poly-pyrimidine tract binding (GO:0008187)	6/20	0.000791698	0.182249	5.08044	36.2811	PTBP1;FMR1;MCRS1;PABPC4;HNRNPU;RBMS3
age and layer genes
Term	Overlap	P-value	Adjusted P-value	Odds Ratio	Combined Score	Genes
protein serine/threonine kinase activity (GO:0004674)	35/369	0.000149406	0.0429916	1.93771	17.069	CAMK2D;MAST4;ROCK2;WNK4;CCNC;PRKCZ;MYLK;TTBK2;RPS6KA5;CHEK2;TLK2;NEK1;MARK3;MAP2K5;MARK2;MAPK4;MAP4K4;MAP3K5;CSNK1G3;PDPK1;EIF2AK1;MINK1;DCLK2;CSNK1D;GTF2H1;EIF2AK4;CDC42BPA;CLK4;RPS6KB1;WNK2;AAK1;ATM;ALPK1;MAP3K14;ATR
phosphatidylinositol binding (GO:0035091)	15/101	0.000114722	0.044015	3.03401	27.5276	PLEKHA1;EPB41;PITPNB;NOXO1;RUNDC3B;MTM1;CCDC88A;ZFYVE16;SH3PXD2A;SNX16;PARD3;MCF2L;MAPT;AIDA;PICALM
microtubule binding (GO:0008017)	23/196	9.41114e-05	0.0541611	2.39728	22.2253	DST;MTCL1;KIF24;DNM1;TTBK2;GOLGA2;EML4;POLB;EML5;CCDC88A;CEP57L1;KIF3A;KIF21A;MAP4;MAPT;KIFC3;KIF20B;FGF13;DNM1L;CLASP1;CDK5RAP2;MDM1;CLASP2
protein kinase activity (GO:0004672)	46/514	6.13639e-05	0.0706299	1.82828	17.7319	DDR1;CAMK2D;MAST4;ROCK2;WNK4;CCNC;PRKCZ;TTBK2;RPS6KA5;EEF2K;GRK4;CHEK2;ABL1;TLK2;NEK1;ABL2;JAK3;MARK3;MAP2K5;MARK2;MAPK4;MAP3K5;MAP4K4;STAT5A;CSNK1G3;PDPK1;TNK2;MINK1;DCLK2;GTF2H1;CSNK1D;EIF2AK4;NRG2;CDC42BPA;CLK4;RPS6KB1;WNK2;IL3RA;AAK1;ATM;ALPK1;MAP3K14;FGFR3;FGFR2;ATR;FGFR1
kinesin binding (GO:0019894)	7/29	0.000398553	0.091747	4.93114	38.5993	SPAG9;CROCC;CLSTN1;PLEKHM2;MAPK8IP3;TTBK2;KTN1
age, layer and prom genes
Term	Overlap	P-value	Adjusted P-value	Odds Ratio	Combined Score	Genes
microtubule binding (GO:0008017)	37/196	4.15037e-10	4.77707e-07	3.14888	68.0242	NUMA1;DCTN1;LRRK2;SKA2;GOLGA2;MAP2;KIF1B;KIF1A;CLASP1;NDEL1;DST;SGIP1;KIF24;KIF23;MID1;EML2;KIF27;DNM1;DNM2;EML4;CAMSAP3;DNM3;CCDC88A;CLIP1;KIFC2;STIM1;FAM161A;APC;CEP57L1;KIFC1;TRPV4;MAP1A;MAPRE3;MAPT;KIFC3;TPT1;MDM1
tubulin binding (GO:0015631)	38/256	2.14251e-07	0.000123301	2.47602	38.0221	NUMA1;DCTN1;LRRK2;DIXDC1;SKA2;GOLGA2;MAP2;KIF1B;KIF1A;CLASP1;NDEL1;BCAS3;SGIP1;KIF24;KIF23;MID1;EML2;KIF27;DNM1;DNM2;EML4;AGBL5;DNM3;CCDC88A;CLIP1;KIFC2;FAM161A;APC;CEP57L1;KIFC1;TRPV4;MAP1A;MAPRE3;MAPT;KIFC3;DNAL1;TPT1;MDM1
protein serine/threonine kinase activity (GO:0004674)	44/369	1.06843e-05	0.00409922	1.98901	22.7677	CAMK2D;PRKDC;NRK;LRRK2;PELI2;ARAF;WNK4;IKBKB;RPS6KA3;NUAK1;SLK;AKT2;FASTK;MKNK1;TLK2;PTK2B;MAP3K7;MAP4K3;MAP3K4;MARK2;SRPK2;MAP4K1;CDKL3;CSNK2A1;DMPK;PRKCB;DCLK2;CSNK1D;CDC7;GTF2H2;CLK4;MELK;MAPKAPK3;RPS6KB1;WNK1;STK25;WNK2;WNK3;SIK3;AAK1;ATM;CDK12;TNIK;CSNK1G1
protein kinase activity (GO:0004672)	54/514	4.35717e-05	0.0125377	1.75243	17.5964	DDR1;LRRK2;NRK;ARAF;IKBKB;RPS6KA3;SLK;AKT2;FASTK;TLK2;JAK3;MAP3K7;MAP3K4;MAP4K1;CDKL3;CSNK2A1;PRKCB;CSNK1D;MELK;MAPKAPK3;IL3RA;SIK3;TNIK;CSNK1G1;CAMK2D;PRKDC;PELI2;WNK4;PKMYT1;NUAK1;MKNK1;ABL2;PTK2B;MAP4K3;MARK2;SRPK2;DMPK;EGF;DCLK2;CDC7;ERLIN2;GTF2H2;CLK4;RPS6KB1;STK25;WNK1;AXL;WNK2;WNK3;AAK1;ATM;CDK12;FGFR3;FGFR1
microtubule plus-end binding (GO:0051010)	6/13	5.45831e-05	0.012565	7.69872	75.569	CLIP1;DST;NUMA1;APC;STIM1;CLASP1
MAP kinase kinase kinase kinase activity (GO:0008349)	5/11	0.000261613	0.0501861	7.58208	62.5418	MAP4K1;STK25;NRK;TNIK;MAP4K3
actin binding (GO:0003779)	29/255	0.000706022	0.11609	1.89701	13.7644	CYFIP1;MYOM1;LRRK2;WIPF3;ARPC5L;NEXN;TRIOBP;SYNE2;SYNE1;ABLIM3;MYO18A;ABL2;FLNB;SYNPO;PHACTR4;DMTN;GSN;TPM3;HIP1R;SORBS1;SSH3;MYO19;CAMSAP3;CCDC88A;MYO1B;BIN1;TRPV4;MAP1A;MAPT
phosphatidylinositol binding (GO:0035091)	15/101	0.000981438	0.141204	2.47731	17.1591	SCARB1;NUMA1;PLEKHA1;EPB41;PITPNB;TULP4;HIP1R;SNX13;NOXO1;CCDC88A;SNX16;PARD3;DPEP1;MAPT;C2CD2L
layer only genes
Term	Overlap	P-value	Adjusted P-value	Odds Ratio	Combined Score	Genes
protein serine/threonine kinase activity (GO:0004674)	42/369	4.96999e-06	0.00572046	2.09423	25.5749	SMG1;PRKAA2;CCNT1;CCNH;PRKDC;MAST3;PELI3;TTBK2;CAMKK2;RPS6KA3;IRAK1;CHEK2;TLK2;STK38L;NEK3;PAK3;CAMK2G;MAP2K5;MAP4K4;PLK4;SRPK2;CDKL2;MAP2K4;DMPK;SYK;NEK4;STRADB;MOK;VRK1;EIF2AK4;CIT;CLK2;CLK1;MAPKAPK3;RPS6KB1;WNK1;WNK2;SIK3;ULK2;PRKCQ;ATR;MAP3K12
GTPase binding (GO:0051020)	14/77	6.10748e-05	0.0175743	3.34532	32.461	GIT2;RCC2;ARAP2;ARAP1;ARFGAP2;FGD2;ACAP3;FGD4;GOLGA4;PEX5L;FGD6;RRAGB;FLNA;LCP1
small GTPase binding (GO:0031267)	13/64	3.31243e-05	0.019063	3.73735	38.5517	GIT2;RCC2;ARAP2;CIB1;ARAP1;ARFGAP2;FGD2;ACAP3;FGD4;PEX5L;FGD6;FLNA;RAPGEF6
phosphatidylinositol-3,5-bisphosphate phosphatase activity (GO:0106018)	6/15	8.32126e-05	0.0191555	7.35971	69.1379	MTMR1;PIKFYVE;MTMR3;MTMR14;OCRL;MTMR4
protein kinase activity (GO:0004672)	50/514	5.0042e-05	0.0191994	1.78981	17.7239	SMG1;CCNT1;MAST3;RPS6KA3;CHEK2;CNTRL;TLK2;NEK3;CDKL2;PDGFRB;MAP2K4;SYK;STRADB;VRK1;CIT;MAPKAPK3;IL3RA;SIK3;ULK2;PRKCQ;PRKAA2;PRKDC;PELI3;TTBK2;CAMKK2;IRAK1;GRK4;ABL1;STK38L;PAK3;CAMK2G;MAP2K5;MAP4K4;PLK4;SRPK2;DMPK;NEK4;TNK2;MOK;EIF2AK4;CLK2;CLK1;TBCK;RPS6KB1;WNK1;FES;WNK2;MAP3K12;ATR;FGFR1
phosphatidylinositol phosphate binding (GO:1901981)	13/82	0.000454828	0.0872512	2.91696	22.4477	DENND1C;OSBPL5;MYO10;WDR45B;DENND1A;ARAP2;SNX13;ARAP1;PLEKHA4;ZFYVE28;PARD3;ARFIP2;ARFIP1
