# Supplementary material for: An Alternative Splicing Program for Mouse Craniofacial Development
Source: Front Physiol. 2020 Sep 4;11:1099. doi: 10.3389/fphys.2020.01099 (PMC7498679; doi:10.3389/fphys.2020.01099)
Supplement: Supplementary file 7 [file Table_7.xlsx]

## Sheet: gene lists
genes of shared across layer events	genes of shared across age events
Lef1	Lef1
Fgfr1	Map3k7
Atp11c	Nasp
Ctnnd1	Arhgef12
Macf1	Scarb1
Lsm14b	Lsm14b
Clstn1	Ptprf
Uap1	Myo1b
Ssbp2	Bin1
Nf2	Slk
Epb41	Itga6
Flnb	Numa1
Myo1b	Scrib
Dnm2	Wsb1
Inpp4a	Mta1
Ralgps2	Tead1
Golim4	Slain2
Dnmt3b	Ect2
Pbrm1	Numb
Itga6	Arhgef40
Usp4	Csnk1g3
Pard3	Gpr137
Scrib	Hnrnpk
Csnk1g3	Rai14
Plekha1	Arvcf
Mfge8	Arhgap17
Rai14	Usp4
Fkbp7	Mtcl1
Enah	Hnrnpa3
Arhgef11	Col2a1
Wiz	Rab11fip3
Rffl	Ssbp3
Magi1	1700088E04Rik
Epb41l3	Crtc3
Lrrfip1	Lsr
Igsf3	Luc7l
Iqsec1	Hnrnpa1
Gas5	Gpbp1
Anks1	Mpdz
Eif5a	Add3
Pcgf1	Ubp1
Ocrl	Tnip1
Evi5l	Brd8
Mast4	Mpzl1
Cuta	Tmem87b
Spag9	Tmem176b
Etl4	Mark2
Mff	Fryl
Plod2	Zmynd11
2019-09-06	Socs7
Sorbs1	Zfp106
Erbin	Ybx3
Arhgef6	Golim4
Dst	Map7d1
Fam126a	Wnk2
Gm1673	Map3k4
Klhl17	Smpd4
Acly	Nav2
Cask	Ppp3cb
Tanc2	Ubqln1
Mpzl1	Ddr1
Inf2	Nfya
Dtnb	Pcnt
Map3k7	Mpv17
Sptan1	Ccnc
Nap1l1	Luzp1
Myo18a	Chka
Zfyve16	Rnps1
Gnas	Osbpl3
Cracr2b	Suv39h2
Zfand6	Sorbs2
Ssbp4	Uspl1
Mbnl1	Rffl
Gk	Synj2
Scn8a	Smox
Aplp2	Capg
Eml4	Dock9
Add3	Vps39
Akap11	Rpl17
Sbf2	Casc4
Pcsk4	Uxs1
Limch1	Wdfy3
Kif21a	Aim1l
Myo9a	Caprin2
Kitl	Lsm5
Nfya	Prom1
Dnm1l	U2surp
Arhgef10l	Ctnnd1
Vps39	Lrp8
Acaca	Pdp1
R3hdm2	Msantd3
Bptf	Hpf1
Gpr137	Suco
Map3k4	Tra2b
Phactr4	Map4
Map2	Kifc3
Tmem63b	Mllt4
Col2a1	Fopnl
Evi5	Fn1
Lrrfip2	Auts2
Hnrnpa1	Mprip
Dennd5b	Mdm1
Tnik	Phactr4
Ptprf	Fgfr1
Mprip	Mllt10
Mtcl1	Ehmt2
Arhgap17	Dtx2
Pbx1	Eml4
Slk	Tpt1
Numa1	Uba3
Hnrnpa3	Ythdf3
Arhgef40	Exoc1
Akap9	Clk4
Wsb1	U2af1
Slain2	Taf6l
Cd44	Scube3
Spire1	Mcfd2
Tecr	Zscan26
Nsfl1c	Tecr
Ptprd	Zfp930
Auts2	Prr3
Ganab	Cacnb3
Mbnl2	Baz2b
Robo1	Bag6
Smpd4	Ptprs
Fmnl2	Papola
Papola	Acly
Tead1	Gm1673
Mink1	Mcrs1
Uggt1	Nnat
Reps1	Tor1aip2
Ttc3	Atxn2
Strn3	Rpl13
Suco	Kif20b
Depdc5	Usp1
Fgfr3	Pabpc4
Stim1	Usf2
Palm3	Nsfl1c
Dock9	Eif5a
Yap1	D2hgdh
Hpf1	Pex2
Nek1	Zfp617
Erc1	Uap1
Tmem87b	Mtmr2
Pigp	Lrrfip2
Rapgef2	Orc1
Atp2b4	Ntan1
Dtx2	Gprasp1
Ect2	Sdccag3
Dcun1d4	Zc3h14
Picalm	Pard3
St3gal3	Med14
Bbx	Pbrm1
Zfp827	Fndc3c1
Tcf7l2	Plod2
Atp6v1h	Emsy
Arhgef12	Cdc42bpa
Clk1	Sptan1
Cadm1	Foxd2os
Actg1	Erc1
Ppp3cb	Nab2
Tnip1	Coq2
Fam21	Adnp
Bag6	Bptf
Flna	Mecp2
Ndel1	Tle1
Tlk2	Pex5
Ybx3	Trim33
1500004A13Rik	Tpd52l1
Map7d1	Senp1
Atf2	Mbnl2
Mapk8ip3	Trp53i11
Prom1	Syne1
Ehmt2	5530601H04Rik
Magi3	Zscan29
St7	Sh2b1
Trappc13	Dnm1l
Synrg	Limch1
Numb	Sncaip
Lsr	Sec31a
Tbp	Git2
5530601H04Rik	Srsf6
Osbpl3	Apbb2
Kifc3	Ppip5k2
Gstk1	Tra2a
Myef2	Tnc
Nasp	Cask
Rsph9	Immt
Baz2b	Smarcad1
Mmp23	Pam
Hnrnpk	Pip5k1c
Lrp12	Map2k7
Tsc22d2	Mark3
Nav2	Mff
1700088E04Rik	Pitpnb
Plec	Esco1
Pdp1	Hnrnpl
Fancd2	Trappc13
Rragb	Cdc7
Fam118b	Zfp740
Tbx3os1	Rragb
Senp1	Ecsit
Bin1	Cadm1
Dlg1	Map4k3
Rftn2	Nhsl1
Mical3	4833439L19Rik
Dnajc8	Map2
Cux2	Evl
Herc6	Cenpu
Cep152	Clstn1
Zkscan7	Snx16
Pknox1	Pank2
Dennd4c	Hmgxb4
Nbeal1	Rbm10
R3hdm1	St3gal3
Pstk	Cklf
Arhgef19	Tlk2
Mapt	Srsf11
Nnat	Tial1
Smarcad1	Mettl3
Sncaip	Dclk2
Fgfr2	Pitpnm2
Scarb1	Sec24b
Sec31a	Trub2
Abi1	Sh2b3
Csnk1d	Map4k4
Lrrc16a	2700099C18Rik
Unc5b	Wnk1
Fat1	Itgb3bp
Fn1	Sarnp
Rapgef6	Cbx3
Adgrg6	Usp37
Ipo11	Akap11
Rbm5	Atr
Scube1	Atrx
Immt	Trnau1ap
Srgap2	Cux2
Phldb1	Ice2
Atat1	Ndufs1
Eif2ak1	Mapk8ip3
Fam184a	Ldah
Mark3	5930412G12Rik
Sdccag3	4930503L19Rik
Chek2	Nop56
Atp11a	Mbnl1
Nfib	Slc22a17
Trit1	Gabpb2
Zscan26	Rad23a
Slx4ip
Ubqln1
Myo6
Atp2c1
Clk4
Exoc1
Epb41l1
Dffb
Zscan29
Ccser2
Ccdc120
Golga2
Tbc1d13
Rhot1
Igsf9
Emid1
Tsku
Tro
Col16a1
Git2
Pank2
Bspry
Lrrc49
Pikfyve
Bod1l
Prepl
Slc37a3
Clcn2
Fgfr1op2
Gpm6b
Efna5
Ssbp3
Zc3h18
Cds1
Sh2b1
Mettl17
Ldah
Zfand4
Med14
Cspp1
Comt
Eefsec
Slc39a14
Tmlhe
Zfp746
Mark2
Inpp4b
Pnkd
Cbx3
Kctd17
Kif21b
Usp34
B3gnt5
Taf6l
Lrch2
Rab11fip3
Mllt10
Ccdc39
Sytl2
Kif20b
Kmt2c
Huwe1
Snx16
Mis18bp1
Egfl7
Pitpnm2
TINCR
Epc2
Rbm25
Ank3
Slc26a11
Rbfox2
Ppp3cc
Nprl3

## Sheet: shared_across_layer_events
GO_Biological_Process_2018
Term	Overlap	P-value	Adjusted P-value	Odds Ratio	Combined Score	Genes
establishment or maintenance of apical/basal cell polarity (GO:0035088)	6/18	2.62162e-07	0.000668908	20.7039	313.754	DLG1;MTCL1;PARD3;ERBIN;SCRIB;MARK2
vesicle-mediated transport (GO:0016192)	23/411	2.53166e-07	0.00129191	3.47584	52.7953	SPAG9;GIT2;CSNK1G3;TMEM87B;APLP2;SCRIB;CSNK1D;MAPK8IP3;SYTL2;DNM2;PIKFYVE;CUX2;SNX16;BIN1;MYO6;ATP6V1H;SPIRE1;ERC1;RAB11FIP3;EVI5;VPS39;LRP12;PICALM
establishment or maintenance of epithelial cell apical/basal polarity (GO:0045197)	7/34	9.72838e-07	0.0016548	12.7877	177.021	DLG1;MTCL1;PARD3;ERBIN;SCRIB;MYO9A;MARK2
microtubule nucleation (GO:0007020)	5/17	5.53522e-06	0.00564925	18.2682	221.125	GOLGA2;AKAP9;SLAIN2;CSNK1D;NDEL1
microtubule polymerization (GO:0046785)	6/28	4.64479e-06	0.00592559	13.3097	163.44	GOLGA2;AKAP9;SLAIN2;CSNK1D;MAPT;NDEL1
regulation of cell-matrix adhesion (GO:0001952)	7/53	2.14517e-05	0.0182447	8.20345	88.1846	MACF1;SLK;MINK1;CASK;NF2;EFNA5;GPM6B
myelination (GO:0042552)	6/38	2.97244e-05	0.0216691	9.80713	102.225	PARD3;SCN8A;ADGRG6;EPB41L3;SBF2;FAM126A
regulation of microtubule-based process (GO:0032886)	5/27	6.32711e-05	0.0248363	11.5022	111.204	ATAT1;MACF1;PHLDB1;MAPT;EFNA5
regulation of alternative mRNA splicing, via spliceosome (GO:0000381)	6/40	4.02252e-05	0.0256586	9.31677	94.2952	RBM25;MBNL1;MBNL2;RBFOX2;HNRNPA1;RBM5
regulation of intracellular signal transduction (GO:1902531)	19/423	6.13956e-05	0.0261085	2.78989	27.0569	ARHGEF11;ARHGEF12;TBP;EHMT2;ZFAND6;ARHGEF19;OCRL;ARHGAP17;MYO9A;RHOT1;AKAP11;RRAGB;CHEK2;MAPT;NF2;ECT2;SRGAP2;RFFL;ARHGEF6
regulation of small GTPase mediated signal transduction (GO:0051056)	10/141	9.77463e-05	0.0262526	4.40509	40.6728	ARHGEF11;RHOT1;ARHGEF12;ARHGEF19;OCRL;ARHGAP17;SRGAP2;ECT2;MYO9A;ARHGEF6
positive regulation of GTPase activity (GO:0043547)	12/193	7.24131e-05	0.0263946	3.86187	36.8157	DOCK9;TBC1D13;RAPGEF2;SCRIB;ITGA6;EVI5L;SRGAP2;ECT2;RAPGEF6;EVI5;NDEL1;PICALM
regulation of cell-substrate junction assembly (GO:0090109)	4/15	7.82367e-05	0.0266161	16.5631	156.617	MACF1;SLK;EFNA5;GPM6B
endosomal transport (GO:0016197)	13/230	9.66322e-05	0.0273952	3.51067	32.4547	SPAG9;TMEM87B;SDCCAG3;SCRIB;PIKFYVE;ZFYVE16;SNX16;BIN1;ERC1;RAB11FIP3;EVI5;VPS39;PICALM
regulation of apoptotic process (GO:0042981)	29/816	6.04932e-05	0.0280633	2.2074	21.4405	RBM25;ZFAND6;LEF1;SLK;CHEK2;MYO18A;FLNA;NEK1;ERC1;ECT2;DNM1L;MAP3K4;RBM5;ARHGEF11;ARHGEF12;MINK1;ARHGEF19;SCRIB;DNM2;HNRNPK;BIN1;ITGA6;TNIK;NF2;FGFR3;CD44;FGFR2;ARHGEF6;FGFR1
regulation of organelle organization (GO:0033043)	9/114	9.58356e-05	0.0287676	4.90356	45.3721	RHOT1;AKAP9;TBC1D13;EVI5L;MAPT;DNM1L;MFF;EVI5;MARK2
neuron projection development (GO:0031175)	11/168	9.09889e-05	0.0290198	4.06684	37.8411	MAP2;EPB41L3;MINK1;RAPGEF2;TNIK;MAPT;KIF20B;SRGAP2;GPM6B;LRP12;DNM2
protein localization to plasma membrane (GO:0072659)	10/131	5.25842e-05	0.0298152	4.74136	46.7171	MACF1;DLG1;EPB41L3;DENND4C;RAPGEF2;FLNA;ANK3;TNIK;FAM126A;RAPGEF6
positive regulation of hydrolase activity (GO:0051345)	11/173	0.000118184	0.0301547	3.94931	35.7146	MTCL1;DOCK9;RAPGEF2;ITGA6;EVI5L;SRGAP2;ECT2;EVI5;RAPGEF6;PICALM;NDEL1
regulation of GTPase activity (GO:0043087)	12/189	5.91813e-05	0.0302002	3.94361	38.3906	DOCK9;RAPGEF2;OCRL;ITGA6;EVI5L;EFNA5;SRGAP2;ECT2;EVI5;RAPGEF6;PICALM;NDEL1
protein localization to cell periphery (GO:1990778)	9/118	0.000124989	0.0303723	4.73734	42.5758	DLG1;EPB41L3;DENND4C;RAPGEF2;FLNA;ANK3;TNIK;FAM126A;RAPGEF6
regulation of cytoskeleton organization (GO:0051493)	8/96	0.000160612	0.0372547	5.17598	45.2201	ATAT1;PHLDB1;ARHGEF19;ARHGAP17;MAPT;EFNA5;GPM6B;MARK2
regulation of adherens junction organization (GO:1903391)	4/18	0.000168819	0.0374558	13.8026	119.899	MACF1;SLK;EFNA5;GPM6B
cytoskeleton organization (GO:0007010)	9/127	0.000218426	0.0384355	4.40162	37.1016	FMNL2;MAST4;DST;BIN1;EPB41L3;MICAL3;FLNB;ANK3;TNIK
microvillus assembly (GO:0030033)	3/8	0.000218053	0.0397402	23.2919	196.369	RAPGEF2;TNIK;RAPGEF6
plasma membrane bounded cell projection morphogenesis (GO:0120039)	6/53	0.000201872	0.041206	7.03152	59.8234	MINK1;EPB41L3;TNIK;KIF20B;SRGAP2;DNM2
microvillus organization (GO:0032528)	3/8	0.000218053	0.0412121	23.2919	196.369	RAPGEF2;TNIK;RAPGEF6
regulation of mitochondrial fission (GO:0090140)	4/19	0.000211137	0.0414396	13.0762	110.664	INF2;MAPT;MFF;DNM1L
phosphatidylinositol biosynthetic process (GO:0006661)	8/99	0.000198917	0.0422947	5.01914	42.7762	INPP4A;CDS1;INPP4B;PIKFYVE;PLEKHA1;PIGP;PITPNM2;OCRL
regulation of microtubule polymerization (GO:0031113)	5/36	0.000262425	0.0446385	8.62664	71.1313	NUMA1;MAP2;AKAP9;SLAIN2;MAPT
generation of neurons (GO:0048699)	9/131	0.00027552	0.0453541	4.26722	34.9778	PTPRD;YAP1;MYEF2;AUTS2;RAPGEF2;MAPT;MARK2;LRP12;FGFR1
protein localization to membrane (GO:0072657)	10/161	0.000289531	0.0461712	3.85788	31.4311	DLG1;EPB41L3;DENND4C;RAPGEF2;FLNA;SCRIB;ANK3;TNIK;FAM126A;RAPGEF6
cytoskeletal anchoring at plasma membrane (GO:0007016)	3/9	0.000323183	0.0485059	20.7039	166.404	EPB41L3;FLNB;ANK3
neuron projection morphogenesis (GO:0048812)	10/164	0.000335617	0.048933	3.7873	30.2967	MAP2;PARD3;EPB41L3;MINK1;ANK3;TNIK;KIF20B;SRGAP2;FGFR2;DNM2
central nervous system neuron development (GO:0021954)	3/9	0.000323183	0.0499758	20.7039	166.404	MAP2;RAPGEF2;MAPT
regulation of microtubule cytoskeleton organization (GO:0070507)	4/23	0.000458475	0.0599896	10.8021	83.0419	ATAT1;PHLDB1;MAPT;EFNA5
phosphatidylinositol metabolic process (GO:0046488)	8/113	0.000489799	0.0609621	4.3973	33.5141	INPP4A;CDS1;INPP4B;PIKFYVE;PLEKHA1;PITPNM2;OCRL;FAM126A
regulation of phospholipase activity (GO:0010517)	3/10	0.000456193	0.0612619	18.6335	143.34	FGFR3;FGFR2;FGFR1
regulation of mRNA splicing, via spliceosome (GO:0048024)	6/61	0.00043842	0.062146	6.10936	47.2396	RBM25;MBNL1;RBFOX2;MBNL2;HNRNPA1;RBM5
neuron migration (GO:0001764)	5/41	0.000488485	0.0623185	7.57461	57.7504	AUTS2;RAPGEF2;MARK2;LRP12;FGFR1
positive regulation of lipase activity (GO:0060193)	3/10	0.000456193	0.0629176	18.6335	143.34	FGFR3;FGFR2;FGFR1
positive regulation of microtubule polymerization or depolymerization (GO:0031112)	4/25	0.000638569	0.0757818	9.93789	73.1059	NUMA1;AKAP9;SLAIN2;MAPT
positive regulation of microtubule polymerization (GO:0031116)	4/25	0.000638569	0.0775862	9.93789	73.1059	NUMA1;AKAP9;SLAIN2;MAPT
protein phosphorylation (GO:0006468)	18/471	0.000673078	0.0780618	2.3737	17.3367	CSNK1G3;MAST4;EIF2AK1;MINK1;CSNK1D;PPP3CB;SLK;CHEK2;ABI1;TLK2;NEK1;TNIK;ERC1;MAP3K7;FGFR3;MARK2;FGFR2;FGFR1
JNK cascade (GO:0007254)	6/67	0.000726971	0.0824386	5.56225	40.1963	SPAG9;MINK1;TNIK;MAP3K7;MAPK8IP3;ARHGEF6
regulation of focal adhesion assembly (GO:0051893)	5/45	0.000755677	0.0838308	6.90131	49.6059	MACF1;COL16A1;SLK;EFNA5;GPM6B
stress-activated protein kinase signaling cascade (GO:0031098)	6/71	0.000988809	0.107359	5.24888	36.3171	SLK;MINK1;NEK1;TNIK;MAP3K7;MAP3K4
GO_Molecular_Function_2018
Term	Overlap	P-value	Adjusted P-value	Odds Ratio	Combined Score	Genes
cadherin binding (GO:0045296)	27/314	1.54888e-12	1.78276e-09	5.34082	145.236	MACF1;DOCK9;CTNND1;GOLGA2;SLK;MPRIP;EPB41L1;MYO6;FLNA;FLNB;LRRFIP1;ERC1;PROM1;SPTAN1;MARK2;SCRIB;CSNK1D;ANK3;DLG1;MYO1B;HNRNPK;FMNL2;ABI1;NUMB;ITGA6;PICALM;PLEC
microtubule binding (GO:0008017)	16/196	1.24642e-07	7.17315e-05	5.07035	80.6075	MACF1;NUMA1;DST;MTCL1;DNM2;GOLGA2;EML4;STIM1;MAP2;KIF21A;KIF21B;MAPT;KIFC3;KIF20B;DNM1L;NDEL1
guanylate kinase activity (GO:0004385)	5/13	1.2139e-06	0.000465733	23.8892	325.41	DLG1;MAGI3;CASK;SCRIB;KIF20B
GTPase activator activity (GO:0005096)	15/250	1.4133e-05	0.00406676	3.72671	41.6162	GIT2;APLP2;NPRL3;OCRL;ARHGAP17;MYO9A;TBC1D13;RAPGEF2;EVI5L;DEPDC5;SRGAP2;ECT2;DNM1L;EVI5;ARHGEF6
nucleotide kinase activity (GO:0019201)	5/23	2.78025e-05	0.00640014	13.5026	141.647	DLG1;MAGI3;CASK;SCRIB;KIF20B
phosphatidylinositol binding (GO:0035091)	9/101	3.70532e-05	0.00710804	5.53471	56.4716	SCARB1;ZFYVE16;NUMA1;PLEKHA1;SNX16;EPB41;PARD3;MAPT;PICALM
GTPase regulator activity (GO:0030695)	15/276	4.46515e-05	0.00734198	3.37564	33.8125	GIT2;APLP2;NPRL3;OCRL;ARHGAP17;MYO9A;TBC1D13;RAPGEF2;EVI5L;DEPDC5;SRGAP2;ECT2;DNM1L;EVI5;ARHGEF6
1-phosphatidylinositol binding (GO:0005545)	4/14	5.8109e-05	0.00836044	17.7462	173.082	SCARB1;ZFYVE16;EPB41;PICALM
phosphatidylinositol phosphate 4-phosphatase activity (GO:0034596)	3/7	0.000137928	0.0176394	26.6193	236.613	INPP4A;INPP4B;OCRL
Rho GTPase binding (GO:0017048)	7/73	0.000172303	0.019832	5.95593	51.6156	FLNA;OCRL;ARHGAP17;SRGAP2;YBX3;EXOC1;STRN3
Ras GTPase binding (GO:0017016)	11/185	0.000212989	0.0222863	3.69313	31.2228	TBC1D13;FLNA;EVI5L;ERC1;DNM1L;RAB11FIP3;EVI5;YBX3;RAPGEF6;PICALM;STRN3
tubulin binding (GO:0015631)	13/256	0.00027784	0.0266495	3.15411	25.8274	NUMA1;MTCL1;DNM2;GOLGA2;EML4;MAP2;KIF21A;KIF21B;MAPT;KIFC3;KIF20B;DNM1L;NDEL1
protein serine/threonine kinase activity (GO:0004674)	16/369	0.000343928	0.0282758	2.69319	21.4784	CSNK1G3;MAST4;EIF2AK1;MINK1;CSNK1D;CLK4;CLK1;SLK;CHEK2;TLK2;NEK1;TNIK;MAP3K7;MARK3;MAP3K4;MARK2
armadillo repeat domain binding (GO:0070016)	3/9	0.000323183	0.0286141	20.7039	166.404	TCF7L2;LEF1;STRN3
Rho guanyl-nucleotide exchange factor activity (GO:0005089)	6/60	0.000400646	0.0307429	6.21118	48.5865	ARHGEF11;ARHGEF12;ARHGEF19;ARHGEF10L;ECT2;ARHGEF6
inositol trisphosphate phosphatase activity (GO:0046030)	3/10	0.000456193	0.0328174	18.6335	143.34	INPP4A;INPP4B;OCRL
phosphotransferase activity, phosphate group as acceptor (GO:0016776)	5/42	0.000547266	0.0349946	7.39426	55.5352	DLG1;MAGI3;CASK;SCRIB;KIF20B
phosphatidylinositol bisphosphate binding (GO:1902936)	7/88	0.000546811	0.0370223	4.94071	37.1117	MYO1B;PLEKHA1;PARD3;MAPT;SYTL2;EXOC1;PICALM
protein kinase activity (GO:0004672)	19/514	0.000717436	0.0434615	2.29596	16.6224	CSNK1G3;MAST4;MINK1;CSNK1D;CLK4;CLK1;SLK;CHEK2;FGFR1OP2;TLK2;NEK1;TNIK;MAP3K7;MARK3;FGFR3;MAP3K4;MARK2;FGFR2;FGFR1
actin binding (GO:0003779)	12/255	0.000924462	0.0532028	2.92291	20.4203	MACF1;MYO1B;BIN1;MYO6;KLHL17;MICAL3;MYO18A;FLNA;FLNB;MAPT;SORBS1;PHACTR4
KEGG 2019 Mouse
Term	Overlap	P-value	Adjusted P-value	Odds Ratio	Combined Score	Genes
Adherens junction	9/72	2.27082e-06	0.000688059	7.76398	100.896	TCF7L2;PARD3;CTNND1;LEF1;SORBS1;MAP3K7;PTPRF;ACTG1;FGFR1
Rap1 signaling pathway	13/209	3.6292e-05	0.00549824	3.86341	39.4992	MAGI1;MAGI3;CTNND1;EFNA5;ACTG1;KITL;PARD3;GNAS;RAPGEF2;RAPGEF6;FGFR3;FGFR2;FGFR1
MAPK signaling pathway	15/294	9.10545e-05	0.00919651	3.16897	29.4843	ATF2;EFNA5;MAPK8IP3;PPP3CB;PPP3CC;KITL;RAPGEF2;FLNA;FLNB;MAPT;MAP3K7;FGFR3;MAP3K4;FGFR2;FGFR1
Hippo signaling pathway	10/159	0.000261848	0.019835	3.9064	32.219	YAP1;TCF7L2;DLG1;PARD3;LEF1;SCRIB;CSNK1D;NF2;TEAD1;ACTG1
Tight junction	10/167	0.00038767	0.0234928	3.71927	29.2162	MAGI1;DLG1;PARD3;RAPGEF2;SCRIB;ARHGAP17;NF2;YBX3;RAPGEF6;ACTG1

## Sheet: shared_across_age_events
GO_Biological_Process_2018
Term	Overlap	P-value	Adjusted P-value	Odds Ratio	Combined Score	Genes
regulation of alternative mRNA splicing, via spliceosome (GO:0000381)	7/40	5.44678e-07	0.00277949	14.1129	203.551	HNRNPL;MBNL1;MBNL2;TRA2B;RNPS1;HNRNPA1;SRSF6
RNA splicing, via transesterification reactions with bulged adenosine as nucleophile (GO:0000377)	14/237	1.66102e-06	0.0042381	4.76385	63.3977	HNRNPA3;METTL3;U2AF1;LSM5;U2SURP;HNRNPL;HNRNPK;TRA2B;TRA2A;PAPOLA;RNPS1;SRSF6;HNRNPA1;SRSF11
mRNA processing (GO:0006397)	15/284	2.83344e-06	0.00481969	4.25943	54.41	HNRNPA3;METTL3;U2AF1;LSM5;U2SURP;HNRNPL;HNRNPK;SARNP;TRA2B;TRA2A;PAPOLA;RNPS1;SRSF6;HNRNPA1;SRSF11
mRNA splicing, via spliceosome (GO:0000398)	14/262	5.34154e-06	0.00681446	4.30928	52.3147	HNRNPA3;METTL3;U2AF1;LSM5;U2SURP;HNRNPL;HNRNPK;TRA2B;TRA2A;PAPOLA;RNPS1;SRSF6;HNRNPA1;SRSF11
regulation of mRNA splicing, via spliceosome (GO:0048024)	7/61	1.02148e-05	0.0104252	9.25436	106.348	HNRNPL;MBNL1;MBNL2;TRA2B;RNPS1;SRSF6;HNRNPA1
RNA transport (GO:0050658)	7/81	6.59804e-05	0.0420872	6.96933	67.0879	ATXN2;SARNP;U2AF1;RNPS1;SRSF6;HNRNPA1;SRSF11
positive regulation of dendritic spine morphogenesis (GO:0061003)	3/7	6.35455e-05	0.0463247	34.5622	334.001	CUX2;CAPRIN2;LRP8
protein phosphorylation (GO:0006468)	17/471	8.78174e-05	0.0497924	2.91076	27.1872	DDR1;CSNK1G3;DCLK2;CDC7;CDC42BPA;PPP3CB;SLK;WNK1;WNK2;TLK2;ERC1;MAP3K7;MAP4K3;MARK2;ATR;MAP4K4;FGFR1
establishment or maintenance of apical/basal cell polarity (GO:0035088)	4/18	6.15831e-05	0.0523764	17.9211	173.748	MTCL1;PARD3;SCRIB;MARK2
chromatin remodeling (GO:0006338)	8/117	0.000106428	0.0543104	5.5142	50.4441	SUV39H2;TAF6L;PBRM1;HMGXB4;CBX3;ATRX;SMARCAD1;BPTF
RNA 3'-end processing (GO:0031123)	6/62	0.000117685	0.0545953	7.80437	70.61	SARNP;PAPOLA;U2AF1;RNPS1;SRSF6;SRSF11
nuclear export (GO:0051168)	7/93	0.00015851	0.0674064	6.07007	53.1112	EIF5A;SARNP;U2AF1;RNPS1;SRSF6;HNRNPA1;SRSF11
termination of RNA polymerase II transcription (GO:0006369)	6/69	0.00021351	0.0838109	7.01262	59.2695	SARNP;PAPOLA;U2AF1;RNPS1;SRSF6;SRSF11
stress-activated protein kinase signaling cascade (GO:0031098)	6/71	0.000249881	0.0910817	6.81508	56.5279	SLK;MAP2K7;MAP3K7;MAP3K4;MAP4K3;MAP4K4
regulation of DNA metabolic process (GO:0051052)	5/47	0.000282369	0.0960619	8.57927	70.1124	USP37;ESCO1;EHMT2;USP1;SMARCAD1
endosome to lysosome transport (GO:0008333)	5/49	0.000344027	0.0975315	8.2291	65.6253	HMGXB4;SNX16;BIN1;GPRASP1;VPS39
mRNA 3'-end processing (GO:0031124)	6/75	0.000337148	0.101204	6.45161	51.5806	SARNP;PAPOLA;U2AF1;RNPS1;SRSF6;SRSF11
positive regulation of protein kinase activity (GO:0045860)	9/173	0.000318306	0.10152	4.19541	33.7836	SLK;NAB2;MAP2K7;ECT2;LRP8;MAP3K4;MARK2;MAP4K3;MAP4K4
nucleic acid metabolic process (GO:0090304)	6/81	0.00051088	0.137212	5.97372	45.277	HNRNPL;ATXN2;HNRNPA3;HNRNPK;METTL3;HNRNPA1
RNA export from nucleus (GO:0006405)	7/120	0.000750597	0.153212	4.7043	33.8458	EIF5A;SARNP;RNPS1;U2AF1;SRSF6;HNRNPA1;SRSF11
gene expression (GO:0010467)	14/412	0.00066763	0.15486	2.74037	20.037	EIF5A;PABPC4;U2AF1;BAZ2B;HNRNPL;HNRNPK;TNIP1;SARNP;RPL13;RNPS1;SRSF6;RPL17;SRSF11;BPTF
RNA processing (GO:0006396)	9/194	0.000730352	0.155291	3.74127	27.0194	HNRNPL;MBNL1;HNRNPK;PABPC4;METTL3;RNPS1;U2AF1;LSM5;SRSF11
establishment or maintenance of epithelial cell apical/basal polarity (GO:0045197)	4/34	0.000798793	0.156779	9.48767	67.6699	MTCL1;PARD3;SCRIB;MARK2
positive regulation of telomere maintenance via telomerase (GO:0032212)	4/33	0.000711687	0.157902	9.77517	70.8492	MAP2K7;HNRNPA1;MAP3K4;ATR
vesicle-mediated transport (GO:0016192)	14/411	0.000652012	0.158439	2.74704	20.1507	GIT2;CSNK1G3;TMEM87B;SCRIB;MAPK8IP3;LRP8;HMGXB4;CUX2;SNX16;BIN1;ERC1;GPRASP1;RAB11FIP3;VPS39
endosomal transport (GO:0016197)	10/230	0.000621706	0.158628	3.50631	25.8873	TMEM87B;SDCCAG3;HMGXB4;SNX16;BIN1;SCRIB;ERC1;GPRASP1;RAB11FIP3;VPS39
regulation of cell cycle process (GO:0010564)	6/91	0.000946902	0.166622	5.31726	37.0205	SDCCAG3;NUMA1;BIN1;KIF20B;ECT2;RAB11FIP3
positive regulation of telomere maintenance via telomere lengthening (GO:1904358)	4/35	0.000893161	0.168807	9.21659	64.7073	MAP2K7;HNRNPA1;MAP3K4;ATR
positive regulation of dendrite morphogenesis (GO:0050775)	3/16	0.000936054	0.170596	15.121	105.451	CUX2;CAPRIN2;LRP8
GO_Molecular_Function_2018
Term	Overlap	P-value	Adjusted P-value	Odds Ratio	Combined Score	Genes
RNA binding (GO:0003723)	41/1388	1.80496e-07	0.000207751	2.38217	36.9893	TRUB2;MTCL1;PRR3;U2AF1;YBX3;SYNE1;TIAL1;MECP2;ATXN2;TRA2B;TRA2A;LUC7L;RPL13;MAP4;HNRNPA1;RPL17;ZC3H14;RBM10;SRSF11;MARK2;EIF5A;NOP56;MBNL1;HNRNPA3;MBNL2;YTHDF3;PABPC4;MCRS1;METTL3;IMMT;SORBS2;TRNAU1AP;LSM5;U2SURP;HNRNPL;HNRNPK;SARNP;RNPS1;SRSF6;LSM14B;TPT1
protein serine/threonine kinase activity (GO:0004674)	18/369	8.96509e-07	0.000515941	3.93391	54.7787	CSNK1G3;DCLK2;CCNC;CDC7;CDC42BPA;CLK4;SLK;WNK1;WNK2;TLK2;MAP2K7;MAP3K7;MARK3;MAP4K3;MAP3K4;MARK2;ATR;MAP4K4
protein kinase activity (GO:0004672)	20/514	7.02373e-06	0.00269477	3.13794	37.2355	DDR1;CSNK1G3;DCLK2;CCNC;CDC7;CDC42BPA;CLK4;SLK;WNK1;WNK2;TLK2;MAP2K7;MAP3K7;MARK3;MAP4K3;MAP3K4;MARK2;ATR;MAP4K4;FGFR1
cadherin binding (GO:0045296)	15/314	9.53667e-06	0.00274418	3.85248	44.536	NOP56;DOCK9;CTNND1;SCRIB;CAPG;MYO1B;HNRNPK;SLK;MPRIP;NUMB;ITGA6;ERC1;PROM1;SPTAN1;MARK2
pre-mRNA binding (GO:0036002)	5/31	3.67565e-05	0.00846135	13.0073	132.82	HNRNPL;TRA2B;U2AF1;HNRNPA1;SRSF6
microtubule binding (GO:0008017)	10/196	0.000174694	0.033512	4.11455	35.601	EML4;NUMA1;MAP2;MTCL1;MAP4;KIFC3;KIF20B;DNM1L;TPT1;MDM1
ATP binding (GO:0005524)	11/256	0.000370892	0.0609852	3.46522	27.3739	ACLY;MYO1B;WNK1;PPIP5K2;WNK2;PAPOLA;TLK2;CDC42BPA;MAP4K3;MARK2;MAP4K4
guanylate kinase activity (GO:0004385)	3/13	0.00049139	0.0706988	18.6104	141.779	CASK;SCRIB;KIF20B
adenyl ribonucleotide binding (GO:0032559)	11/280	0.000781845	0.0999893	3.1682	22.6649	ACLY;MYO1B;WNK1;PPIP5K2;WNK2;PAPOLA;TLK2;CDC42BPA;MAP4K3;MARK2;MAP4K4
KEGG 2019 Mouse
Term	Overlap	P-value	Adjusted P-value	Odds Ratio	Combined Score	Genes
Spliceosome	9/132	4.04401e-05	0.0122533	5.49853	55.6215	HNRNPA3;HNRNPK;TRA2B;TRA2A;U2AF1;SRSF6;LSM5;HNRNPA1;U2SURP
Adherens junction	6/72	0.000269805	0.0408754	6.72043	55.2272	PARD3;CTNND1;LEF1;MAP3K7;PTPRF;FGFR1
