# Supplementary material for: An Alternative Splicing Program for Mouse Craniofacial Development
Source: Front Physiol. 2020 Sep 4;11:1099. doi: 10.3389/fphys.2020.01099 (PMC7498679; doi:10.3389/fphys.2020.01099)
Supplement: Supplementary file 8 [file Table_8.xlsx]

## Sheet: SE genes
NE.layer_genes	NE.age_genes
Mapt	Ano1
Vav2	Gpr137
Dst	Lef1
Gpr137	Hnrnpl
Slc25a25	Tra2b
1500004A13Rik	Fgfr1
Eml4	Scarb1
Bnip2	Hnrnpa1
Madd	Csnk1d
Map3k4	Myo1b
Dync1i2	Gnas
Smarcad1	Add3
Tmem63b	Srsf6
Map2	Kifc3
Mical2	Tia1
Fgfr1	Slk
Col2a1	Itga6
1700088E04Rik	Numa1
Ctnnd1	Lsr
Arhgef12	Mta1
Lrrfip2	Slain2
Afap1	Auts2
Map6	Tra2a
Scarb1	Zfp280d
Lsm14b	Lsm14b
Hnrnpa1	Vps39
Tpd52	Col2a1
Tnik	Ptprf
Mpzl1	Plekha1
Parp6	Pcnt
Ptprf	Usp4
Csnk1d	Mpzl1
Mef2d	Nop56
Bbs9	Apba2
Epb41	Tial1
Dennd5a	Slc1a3
Arhgap17	Terf1
Flnb	Clta
Pbx1	Mink1
Myo1b	Arhgef40
Bin1	Atp6v1c2
Dctn1	Wsb1
Git2	Taf6l
Gnas	Nav2
Clasp1	Eml4
Sh3glb2	Ankrd10
Add3	Phf20
Synrg	Tenm4
Kifc3	Rbm5
Dock11	Atat1
Kif1b	Trmt11
Golim4	Zfp930
Robo2	Zfp568
Slk	Smpd4
Itga6	Luc7l
Dock7	Dock11
Numa1	Tfdp2
Usp4	Tead1
Hnrnpa3	Ssbp3
Cadm1	Phactr4
Lsr	Tmem80
Scrib	G630016G05Rik
Arhgef40	Mcf2l
Smpd4	Sorbs1
Zfyve27	Mapt
Mta1	Arhgef12
Faim	Ctnnd1
Tpd52l2	Syne2
Tead1	Trub2
Mfge8	Cttn
Slain2	Scube3
Mllt4	Map3k4
Ank2	D330041H03Rik
Trappc13	Arhgap17
Phldb1	4833418N02Rik
Tecr	Lrrc45
Erc1	Sltm
Syne2	Apbb2
Mef2a	Scrib
G2e3	Irak1
Gabbr1	Ttc41
Auts2	Mprip
Ppip5k2	Golim4
Ppfia3	Kyat1
Clstn1	Alkbh1
Zfp280d	Ybx3
Grip1	Hnrnpa2b1
Atp6v0a1	Slc16a3
Dennd1a	Mtcl1
Dock9	Osbpl3
Meaf6	Pvt1
Daam1	Prpf39
Nav2	Kif24
Kalrn	Mcfd2
Fryl	Stx2
Pcnt	Paqr5
Clasp2	Arhgef9
Taf8	Tubgcp4
Apbb2	Rps19
Sft2d1	9930021J03Rik
Fn1	Ciz1
Kif1a	Tecr
Cpeb4	St3gal3
Ank3	Taf8
Dcun1d4	Pla2g6
Suco	Slc18b1
Dmxl2	Gm44965
Exoc1	Dock7
Nf2	Dctn1
Plekha6	Fmnl2
Tmem44	Fndc3c1
Pla2g6	Ccdc74a
Arhgef10l	Guf1
Ppfia1	Fbxl3
Fam135a	Srsf11
Numb	Ppp4r1l-ps
Atp6v1h	Snx16
Lef1	Snap91
Ybx3	Crispld1
Ccser2	Nasp
Fam65b	Bbof1
Tra2b	Etl4
Wdr35	Ctns
St3gal3	Rere
Prrc2b	Sfi1
Vps39	Kif1a
Tlk2	Rin2
C330018D20Rik	Klhl32
Plekha1	Tcte2
Esrp1	Ncoa5
Mark2	Dock9
Myo5a	Bicd1
Frmd4a	2610301B20Rik
Rai14	Gsg1l
Tmem87b	Nemp2
Sh3pxd2a	Ablim2
Ehbp1	Faim
Picalm	B130024G19Rik
Fhl1	Fsd1l
Nrxn1	Tpd52
Cadps	Gm26550
Ildr2	Pank2
Cacna2d1	Cpa5
Zcchc2	Dmxl2
Pard3	Depdc1a
Nfya	Fbxw11
Phactr4	Dtx2
Atp8a1	Ctsa
L1cam	Dot1l
Eml2	Rc3h2
Rab12	Ttc6
Nrcam	Limch1
Ncam1	Uba3
Slc1a3	Krt7
Mast4	Ccdc77
Golga4	Fam192a
Mon2	Zfp827
Gstk1	Rab11fip3
Strada	Sh2b3
Pitpnm2	Nt5dc1
Mapk15	Henmt1
Mapk8ip3	Fam204a
Bag6	Robo2
Gm21811	Slc9b2
Myo6	Slc4a7
Cask	Rad52
Synj2	Dnmt3b
Socs7	Pqlc2
Map3k7	Cbfa2t2
Synj1	Ccnc
Eef1d	Rap1gap
Apba1	C330018D20Rik
Pou4f1	Fbxl21
Apba2	G6b
Nrxn2	Vgll1
Nkain4	Chrd
Krt7	Park7
Napb	Olfm5
Depdc1a	Rell2
Arhgap39	Fam185a
Mtcl1	Fopnl
Fmnl2	Fam149b
Dennd3	Naa16
Slc7a4	RP23-218K15.5
Med12l	Myo9a
Tom1	Mettl20
Thap3	Sp8
Slc16a5	Flnb
Macrod1	Chrnb1
Limch1	Fam193b
Erbin	Trnau1ap
Map4k4	Gcc2
Epb41l3	Immp1l
Zfp384	Stk25
Baz2b	Smim8
Cyfip1	Ank2
Mprip	Narfl
Arvcf	Ccdc138
Cep152	Btd
Smg7	D030055H07Rik
Clk4	Baz2b
Luc7l	Fgd2
Dot1l	Zcchc17
Prdx6	Scamp4
Cish	Hpf1
Sorbs1	Slc29a1
Emc10	Ankrd24
Psd3	Kcnj15
Wnk1	Anxa6
Atl1	Pisd-ps1
Fsd1l	Gpatch2l
Gpatch2l	Hnrnpa3
Tcf7l2	Dnah1
Lysmd4	Card14
Mfsd6	Six3os1
Stx2	Gosr2
Zfp668	Pcyt2
Cspp1	Clip4
Ccnt1	Iqcb1
Rai1	Mettl3
Elavl2	Hnrnpdl
Meg3	Clcn4
Dopey1	Mark2
Nasp	Hnrnpk
Bbx	Fnbp4
Ralgapa1	St18
Huwe1	4833439L19Rik
Kidins220	Zfp408
Tfap2a	Pax6
Epb41l2	Gm5148
Clta	Osr2
Dkkl1	Fam21
Nckap5	Arl5c
Nsmf	Pi16
Pex5l	Ccdc150
Zfp937	Ap3m1
Pip5k1c	Gpr83
Jakmip2	Bbx
Tnip1	Zfp617
Map7d1	2019-03-02
Tsku	Pot1b
Fgfr1op2	Calr4
Scube3	Wnt10b
Hpca	Sptan1
Adgrl2	Zfp182
Aim1l	Fut10
Cadm2	Focad
Osbpl3	Postn
Adgre5	Ulk2
Cfap52	Cacnb3
Lrp8	2310030G06Rik
Dtnb	Agbl5
Eno4	Zfp839
Gm15631	Cyp4f13
Adgrg6	Oasl2
Bcas1	BC049352
Ubap2l	Klk11
Pdp1	AW554918
Zfp708	1110017D15Rik
6430548M08Rik	6430573F11Rik
Fam204a	Macrod2
Fam60a	Mical2
Fam21	Adgra3
Srsf11	Zfp991
Paqr5	Phkg2
Mcoln3	Smox
Sobp	A730017L22Rik
H2-T10	Wdr78
Nhsl1	Sp3
Adgrl3	Firre
Slc9b2	D930015E06Rik
Guf1	Sema3f
Usp53	Exoc1
Rrm2b	Epb41l2
Fnbp1	Syt7
Evl	6430531B16Rik
Tmub2	Lingo1
Dtx2	Tmem41b
Scamp4	Pon1
Fam171a1	Lsm5
Mink1	Arid5a
Fndc3c1	Pam
Pou2f1	Proca1
Egflam	Tlk2
Sorbs2	Tom1
AU022754	Glt1d1
Scnn1g	Gm8206
Slc18b1	Slc16a5
Psma3	Map4k1
Nup210l	Map4
Camta2	Synrg
Rgl1	Akap10
Hmgn5	Usp21
Gria2	Cadps
Akap9	Slco4c1
Ntng2	Def8
Pstk	Btbd19
Crnde	Greb1
Gli2	Ppfia1
Cyp2r1	Sncaip
Clec16a	Slmap
Bicd1	Gm11110
Aplp2	Prr3
Tpt1	Sorbs2
Fbrsl1	Tpcn2
Ccp110	Trit1
Plag1	Ago4
Pbrm1	Myt1l
Il3ra	Glmp
1700123M08Rik	Git2
Fnbp4	Tcf7l2
Sypl2	Depdc5
Rhbdl3	Tufm
Rragb	Zfp280c
Pabpc1l	Nme5
BC034090	Thap6
Cacnb1	St5
Eno2	Ggcx
Rapgef2	Kat2b
Snap91	Mrpl33
Ip6k2	Stx3
Wasf3	Ndufs1
Etl4	Faxc
Arfip1	Dusp15
Cadps2	Cyfip1
Clip4	Nrxn2
Nol4	Terb1
Fgd2	Nxn
Kif17	Pikfyve
Zfp827	Prpsap2
Kcnab2	2610316D01Rik
Depdc5	2610021A01Rik
Rfx2	Nedd4
Dyx1c1	U2surp
Ndel1	Ralgps2
Xpo1	Pcsk4
Celf3	Rapgef1
Slc43a1	Erg
Nkiras1	1700086O06Rik
Tmem240	Zmym4
Arhgap12	Ccdc15
Ncoa2	Rsbn1
A730017L22Rik	Sgsm2
Dnaaf3	Clasp2
Myo9b	Dclre1c
Fam192a	Map4k3
Cdk8	Cacnb4
4933431E20Rik	Abl1
Osgepl1	Rnf135
Cracr2b	Slc22a17
Nutf2	Snph
Mettl9	Zcchc2
Ccdc130	Myo19
Rims2	Meg3
Dgki	Dclk2
Mtf2	A630001G21Rik
Zfp385b	Kif1b
Pi16	Anp32a
Ptpro	Fam219b
Srpx	Ecel1
Kcnj15	Tm9sf4
Podn	H60b
TINCR	Prss36
Myo18a	Ptprz1
Rabl6	Tdrd9
Fam198b	Synj2
T2	Fsip1
Mycbp2	Slc24a2
Klhl26	Kcnip2
Lhx6	Nin
Slc38a6	Caps2
Rapgef1	Zfp956
Tnrc6a	Prdm2
Nme5	Mbnl1
Rsrp1	Atrx
Prss36	Efemp1
Stxbp5	Fign
Plekhm1	Crebrf
Abl1	Ccdc62
Rgs11	Ppcdc
Dnajc8	Rgs11
Mbnl1	Adamtsl5
Hpf1	Bbs9
Alkbh1	Kpna2
Med7	Top3b
Nin	Fam188a
Sgk3	Atp11a
Luc7l2	Rai1
Ddhd1	Hemk1
4930503L19Rik	Il3ra
Ap5s1	Acrbp
Chrd	Mbtps1
Tdrd9	Mib2
Lpcat2	Zfp78
H60b	Plekhs1
Lpgat1	Iqsec1
Vgll1	Nfyc
Mgat4a	Pan3
Bbof1	Sgip1
Agbl2	Fnbp1l
Polr3gl	Dnajc6
Mpp3	Trmt13
Zfp426	Ncor1
Mical1	Nudt21
Plec	Sync
Comt	Ptpn13
Pnkd	Plch1
Kcnn1	Zscan26
Preb	Il1f5
Pvt1	Wdr81
Ctsa	Aste1
Ggta1	Adcyap1r1
Syt7	Speg
Kyat1	Polr3gl
Ppp1r26	Suco
Mir99ahg	Cacna1d
Mcf2l	Nhsl2
Ccnc	Cspp1
Ankrd24	Pter
Tbc1d13	Panct2
Ttc28	Dleu2
4833439L19Rik	Emcn
Bptf	5530601H04Rik
Gm11837	Gspt2
Wnk2	Hfm1
Mas1	Wnk1
Tsc22d2	Parp11
St6galnac6	Tcf12
Nfasc	Dopey1
Srcin1	Rnf111
Cacna1d	2610020H08Rik
Six3os1	Xpo1
Ralgps2	Tep1
Prrc2c	Zfp947
Wdfy3	Spats1
Dcaf10	4933431E20Rik
Spo11	Map2
Ecel1	Optn
4933408B17Rik	Ube2h
Amn1	Irgm1
Tanc2	Ralgps1
Snx19	Wnk2
Anp32a	Wdfy3
Macrod2	Zmynd11
D930015E06Rik	Chka
Elavl4	Dync1i2
Asph	Foxm1
Lacc1	Hmga1
Kansl2	Lmo7
Cux2	Csnk1g3
2019-03-08	Ect2
Tpcn2	Mcrs1
Trmt11	Mef2a
Aph1a	Prom1
Pde7a	Nphp1
Snhg11	Cadps2
Cd44	Map3k7
Sncaip	Setd3
Iqce	Zfyve27
Slain1	Gtf2ird1
Nup35	G3bp2
Cnot2	Bin1
Ppil2	Dtx3
Nxn	Rnps1
Kcnip2	Vkorc1l1
Tmem120b	Atp8a1
Slc35d2	4933407K13Rik
Pcdh19	Numb
Tpp1	Nrcam
AI314180	Fbxo41
Zfp788	Clstn1
Lgals12	Tor1aip2
Agfg2	Dst
Zc3h12b	Gpbp1
Ccdc136	Zfp106
Stk35	Foxk2
Ywhaq	Tbc1d24
Rab11fip3	Commd10
Ppp1r9a	Gm44206
Spata1	Ddhd1
Pacsin3	Ehmt2
Ermard	Erbin
Ggt5	R3hdm1
Nudt21	Madd
Susd3	Rpl17
Itfg2	Ntan1
0610037L13Rik	Lrrc14
Slc25a53	Nfya
Fnip2	Isca2
Hps3	Atg13
Otud7b	Fam118b
Phyhd1	Tpd52l2
Ldb2	Abhd14a
Dnmt3b	Gyltl1b
Enthd2	Ndufaf5
2610316D01Rik	Cyp4f16
4930522L14Rik	Ehmt1
Adar	Nipa1
Spats1	Tmed5
Pank2	Dysf
Dpp7	Ttc13
Ecm1	Kcnh2
Trpc1	Stap2
Zfp961	Ubap2l
Gosr2	Mfge8
9330182L06Rik	Tm7sf2
Ccdc64	Med12l
Eldr	Ccdc126
Cep63	Zfp644
Lrp8os2	Slc35d2
Cdc42bpa	Yme1l1
Mroh3	Fam135a
Kcnn2	Pum1
Mpp2	Eps15l1
Actr3b	Ubqln1
Csnk2b	Bcl11b
Tc2n	Parp6
Rpl10a	Cask
Kazald1	Cadm2
Nap1l4	Myo5a
Fam118b	Rbsn
Scn8a	6230400D17Rik
Tle1	Zc3h7a
Ptprd	Adamts6
Zfr2	Mcoln3
Tab3	Celf4
Igsf9	Gm15631
Thap6	Ttc3
Zfp956	Igdcc4
Fam76a	Supt20
Arpc1a	Cdk8
Sptan1	Rpain
R3hdm2	Slc12a9
Mbnl2	Adgrl2
Flna	Eif2a
Robo1	Airn
Evi5	Pgap2
Macf1	Khdrbs3
Mark3	Slc9a8
Sec31a	Cul1
Pcgf1	Gli2
Ssbp2	Smc6
Nek1	Kdm5a
Fam126a	Grip1
Mpp6	Cpt1b
Dennd5b	Pou6f1
Gfra1	Gm21811
Immt	Amn1
Sbf2	Zc3h14
2019-09-06	Slc25a53
Dnm2	Brwd3
Inpp4a	Mapkapk3
Phf21b	Tanc1
Reps1	Tex26
Fat1	Rcbtb1
Dlg1	Casc4
Papola	Hexdc
Igsf3	Epb41
Pxdn	BC065397
Csnk1g3	1700123M08Rik
Ocrl	Mark3
Wsb1	Usp3
Mical3	Fam126a
Plod2	Pex2
Ect2	Mff
Spire1	Anxa9
Magi1	Fam161a
Enah	Rbpms
Acly	Kirrel3
Nsfl1c	Inip
Arhgef11	Crtc2
Lrrfip1	Gm28036
Spag9	Ap4e1
Wiz	Cpne1
Rapgef6	Arhgap18
Eif4g3	Col25a1
Atp11c	Tec
Palm3	Luzp1
Ppp3cb	Zfp276
Sbf1	9330182L06Rik
Evi5l	Icosl
Ganab	Urb1
Uggt1	Gm11744
Ppp2r2d	Fam198b
Fkbp7	Nrp2
Strn3	Slx4
Stim1	Miat
Efna5	4932441J04Rik
Ttc3	5930412G12Rik
Ehmt2	Katnal2
Prc1	Dcun1d4
Nrg1	Fbxo34
Clip1	Klf8
Far1	Gabbr1
Myef2	4933430I17Rik
Adam15	Ddx3y
Magi2	Kcnn1
Cit	Mpdz
Mthfs	Cd44
Eif2ak1	Tenm2
Msi2	Plcb1
Ppp1r12a	Thap7
Slc4a7	Sbno1
Gas5	Exosc1
Adora1	T2
Inf2	Setx
Kif20b	Acnat1
Dysf	0610010K14Rik
Pigp	Pitpnm2
Bcor	Msantd3
Mllt10	Ncoa6
Scoc	Clec12a
Zc3h18	Ubn1
Atp2a3	A730017C20Rik
5530601H04Rik	Plekha6
Kif21a	2210011C24Rik
Chek2	C330007P06Rik
R3hdm1	St6galnac6
Ssbp4	Rps24
G630016G05Rik	Nrk
Eya4	Cds1
Pde4b	Notum
Wdr59	Hmgn5
Kcnma1	1700012B09Rik
Usp29	Adarb1
Fancd2	Gm27151
Pikfyve	Dab2
Rffl	Ypel4
Rbm5	Zfp945
Atp2b4	Cep170
Dennd4c	Arhgap1
Rabggtb	Gfy
Dnm1l	Slit2
Dap3	Igsf9b
RP23-357C16.1	Pbrm1
Gk	Brd8
Tnfrsf22	Lypd6b
Mff	BC029214
1110017D15Rik	Srcin1
Atf2	Sipa1l1
Epb41l1	Gad1
Fbxl2	C530008M17Rik
Mtmr2	Nr6a1os
Haus8	Sec14l2
Ttc5	Pced1a
Slc39a14	Cped1
Uspl1	Acin1
Ccar2	Dtnb
Slx4ip	Gprasp1
Tbc1d24	Atp2c2
Dlg5	Atxn2
Cacna1c	Tmem68
Col6a3	Pnpla6
Ano1	Sspo
Cstf2	Tarbp2
Rnf38	Mki67
Dnm1	Zfp455
Cacna2d3	2700099C18Rik
Brsk2	Mpv17
St7	Noxo1
Chpf2	Zfp711
Rassf1	Shq1
Stx11	Herc6
Flnc	Arntl
Spink10	N6amt1
Prom1	D2hgdh
Zbtb18	Arap2
Nadk2	Zfp788
Mtmr4	Vwce
Bcl11b	Arpc1a
Me2	Dyx1c1
Pclo	Poln
Rara	Sharpin
Capg	Ptdss2
Sox17	Fgfr3
Cuta	Carm1
Slc38a10	Csnk1g1
Uhrf2	Uxs1
2700049A03Rik	Pex5l
Aldh16a1	Pappa
Relb	Med7
Irf2	Aasdhppt
2610021A01Rik	Arl13b
2410004B18Rik	Nav1
Kcnt2	Slc25a40
Alpk1	Ndor1
F8	Med15
Setd3	Eml5
Cap2	Bnipl
Kctd9	Ppp1r26
Mdm4	Mrps36
Slc7a7	Slitrk4
Exoc3l	Gstm6
Zscan29	1500004A13Rik
Ptprs	Nfib
Nap1l1	Pex5
Ubqln1	Mapk8ip3
Rad52	Lgals12
Smim5	Foxo3
Ss18	Adgrb2
Ipo11	Nr1d2
AU022252	Lmo3
Rnf214	Trim26
Kif24	Serac1
Prrg2	Kif21a
Cyb5rl	Ppil2
Dennd1c	Ddx59
Pradc1	Ggt5
Fap	Dmpk
Arntl2	Dscaml1
Klhl24	Ppfibp2
Ttc39b	Pcgf2
Nbeal1	Nkain4
Upf3b	Dnase1l1
Sorbs3	Eno2
Ebf3	Dap3
Msl3	Pramef8
Lrch2	Gabpb2
1110019D14Rik	Rasl12
Cep192	Nbeal1
Prmt3	Kcnn2
Ldlrad4	Arfgap1
Gm11110	Gm18666
Hbs1l	Ermard
Smim8	Mtg2
2610027K06Rik	Napg
Rprd2	Lhfpl1
Eif2s2	Lemd1
Phf6	Gltscr1
Dip2a	Aak1
Bnipl	Chrng
Igsf9b	Crem
Tex26	Fam53b
4932438A13Rik	Nsun3
Camk2d	Dnm1
Tars2	Arnt
2310030G06Rik	Aim2
Lypd6b	Adgrv1
Bmpr1b	Zzz3
Ctdspl	Ptk2b
Foxp1	Raet1e
Col16a1	Bcas3
Cfap69	Tbc1d23
Uggt2	Klhl18
Oprl1	Mapkap1
Adarb1	Kazald1
9230110C19Rik	Syt14
Slc12a6	Entpd5
Egfl7	Dmtf1
Lins1	Fam229b
Arhgef19	Spata1
Fip1l1	Zfp551
Klhl32	Ccdc187
Meis2	Slc35a2
Fam71e1	Lrrfip1
Kirrel3	Iqce
Cacna1g
Cnnm1
Pde2a
Ccdc138
Slmap
Nudt6
Fzd6
Ntmt1
Ccdc66
l7Rn6
Hpn
Fam193b
Golga2
Arap2
Slc37a3
Spata13
Nt5dc1
Lbr
Mdn1
Clec12a
Fam188a
Pla2r1
Ube2h
Crem
Tet3
B230208H11Rik
Hemk1
D030068K23Rik
Slc39a2
Asxl3
Tmem143
Phkg2
Tmem164
Prss8
Med21
Drp2
Qdpr
D330041H03Rik
Scmh1
Elmo3
Clec1b
Smarca2
Mast3
Lmo3
Ccdc17
Radil
Gspt2
Fam169b
Ppfia2
Ccdc88a
Prr3
Entpd1
Rin3
Synpo
Tbx22
Dnajc6
Bcas3
Psma6
2010001A14Rik
2610301B20Rik
Scube1
Pax6
9430038I01Rik
Rbm34
Lhfpl1
C2cd5
Sytl2
Cyp4f16
Kars
Aim2
Pih1d2
Sec14l2
Marveld2
Lin52
Tpm3
Mgat1
Rsbn1
Vps51
Pcdh11x
4930427A07Rik
Miat
Plagl1
Gm20521
Samd10
Stradb
Nfib
Optn
Micu3
Trit1
5031425E22Rik
Slc4a11
Scn3a
Zfp2
RP23-316L10.2
Smox
Tnc
Myo9a
Fam73a
Herc6
Rnaset2b
Wbscr27
Snhg14
Dclk2
Rnf157
Runx2
Acot8
Tenm4
Miip
Mier1
Aif1l
Gm16835
Kitl
Tspan32
Madcam1
4933430I17Rik
Slit2
Fbxo44
Zbtb37
Serp2
Ythdf2
Dtx3
4933407K13Rik
Ska2
Lrrc9
Gm28042
Ccdc173
Cul9
E130307A14Rik
Mov10
Susd1
Spns2
Dnajc25
Kank1
Hfm1
Kctd17
Ank1
Arhgef6
Adgrg2
Fam161a
Tmem241
Ccdc88b
Clvs1
Ceacam10
Zfp219
Aste1
Kcp
Megf11
Ccdc80
Ccdc85a
Zdhhc23
Arntl
Phf7
Gfra4
Pecam1
Pak3
Actg1
Ptgr2
2810429I04Rik
Zfp800
Kmt2c
Henmt1
Ralgps1
Tipin
Dis3l2
2610307P16Rik
Lcp1
Prdm16
Vwce
Dbp
Ncor2
Gon4l
Gpm6b
Fbxo34
Tmem80
Tac1
Carf
C330021F23Rik
Lrch3
Kif2a
Map4
Hmgn3
Add1
Hdlbp
Snx14
Erp44
Ptma
Bzrap1
Rubcn
Smap1
Nav1
Tmcc1
1700016H13Rik
Map2k7
Aftph
6430573F11Rik
Ap1ar
Paqr6
Zscan26
Ythdf3
Oxnad1
Sdccag3
Ktn1
Ranbp17
Magi3
Dync2h1
Ercc6l2
Cpa5
Zfp113
Cdon
Dzank1
Kin
Card14
Mapkap1
Ndrg4
Qrich1
Pdzd2
Bhlhb9
Zfp180
9930021J03Rik
Spaca1
B3gnt5
Rusc2
Stmn4
Diaph2
Polh
Sema4a
Tep1
Osr2
Atp6v1c2
Esco1
Gfra2
Smc2
Agap1
Runx1
D430041D05Rik
Lmo7
Snrk
Adamtsl1
Aak1
Zfp653
Elk4
Tacc2
Zfp62
Gpr155
Ttc6
Cpeb2
Nop56
Myh14
Gm20517
Dleu2
Trim9
Plekha5
Brdt
Mdfi
Slco4c1
Hdac9
Unc45a
Ncoa6
Tbp
Cyp20a1
Plpp1
G6b
5730480H06Rik
Gnpda1
Klc1
Lgals9
Stk25
Zmym5
Senp5
Dab1
Thap7
Sipa1
Tcf12
Cdc7
Armcx1
Josd2
Mgat5
Neto2
Postn
Noxo1
Park7
Kat2b
Prr14l
Tlcd2
Ccdc150
Map4k3
Zfp862-ps
Efcab12
Mecom
Tacc1
Cacnb3
Zfp229
Xpo4
Efcab10
Zfp532
Adamts9
Ndufaf6
2810474O19Rik
2019-09-04
Cables2
Setbp1
Rftn2
Csf2ra
Spata7
D930020B18Rik
Kcnq4
Il1f5
Ccdc90b
Zscan22
Camsap3
Appbp2os
Zfp661
Zfp870
Gm8206
Clcn5
Rfwd2
Rbm25
Abcg5
Elmod3
Ankrd11
Ccdc74a
Dph7
Terb1
Apbb1
Vps8
Catsperd
Ablim3
Ovgp1
N4bp2
Tsc22d1
Xpo6
Akt2
Proca1
Akr1c13
Mrps10
Fsip1
St5
Sap18
Pde1c
Pfkfb2
Usf2
Pdlim7
Cacna1a
Greb1
BC065397
Adgrb1
D7Ertd443e
Pdpr
Snx16
Prpf40b
K230010J24Rik
Zkscan7
Pan3
Tmem25
Mapk12
Zfp850
Ccdc142os
Cbfa2t3
Man2c1
Lyar
Tnrc6c
Pde10a
Cipc
4930447C04Rik
Cyp4f13
Thsd7b
Ceacam1
Zfp655
Atat1
Top3b
Acnat1
Zufsp
Cdk5rap2
Zfp991
Mpped1
Tmem161b
Rhot1
Stat5a
Mrpl33
Zfp551
Nphp4
Nt5c3
Eef2k
Lrrc17
Uvssa
Dph3
Slfn9
Sumo2
Dclre1c
9030617O03Rik
Rltpr
Prpsap2
Ppp1cc
Adamtsl5
Map2k5
Tbc1d23
Dcp1b
Chrnb1
Aif1
Timm10b
Zfp78
Crlf2
Zscan25
Sdhaf3
Otx2os1
Ice2
Sipa1l1
Adamts7
Ccdc39
Mettl8
Zfp959
Raph1
D030055H07Rik
Fam92a
Arhgap33
Clcn7
Stil
Trub2
Slc46a1
Abhd14a
Tarbp1
Chn1
Cage1
Rtn4ip1
Lmf1
Mtss1
Xylb
Kcnh7
Zc3h11a
Kcnc3
Malsu1
Sh2d5
Sema3f
Glmp
Ttc41
Ppfia4
Prkcz
Cep170
Ppargc1b
Mcfd2
Aldoa
Prr14
Kdm8
Gm13212
Ceacam19
Ppcdc
4930451G09Rik
Crtc1
Dennd1b
Atp5sl
Acsl6
Zfp516
Ccdc163
Mapkapk3
Nemp2
Kif3a
Zfp644
Ryr1
Cars2
Cklf
Ercc6
Pld2
Wdr17
Spice1
Iqsec2
Nnat
Yap1
Mdm1
Col11a2
Fgfr3
Dgkd
Sgip1
Zdhhc20
Abi1
Mfng
Card19
Tle3
Ldah
Gm14207
Pcsk4
Camta1
Emc8
Atp11a
Lrrc49
Kif21b
Gm21969
Rpl19
Eif4h
Atp6v1f
Zfand6
Rad54l
Rtel1
Fam196b
Stum
Slc33a1
Zfp182
Ndrg3
A230046K03Rik
Dffb
Btbd19
Adamts16
4933434E20Rik
Arid3c
Tnrc18
Rev1
Alkbh3
Espn
Gltscr1
Rnf112
Pam
Terf1
Ccdc120
Srek1
Dapk3
Ppfibp1
Eno1
Cenpu
Porcn
Rab7b
H2afy
Zfpm2
Chadl
Gm44965
Gmpr2
Dlg4
Xaf1
Gusb
Cbx3
Sun1
BC026585
Rbm10
Zfp821
Gm21451
Rbms1
Rreb1
Zcchc6
Eif4e2
Kcna6
5930412G12Rik
Mettl17
Adamtsl2
Rabgef1
Hmcn1
Prmt9
Adcy9
Adamts18
Fktn
Tctex1d2
Nrip2
Proser2
Tial1
BB218582
Pigq
Lta4h
Erg
Pot1a
Gpsm2
Fgfr2
Tbx3os1
Slc16a11
Fbxw7
Bod1l
Tmem163
Rbm4
Cep44
Fam184a
Rpl36a
Fam234a
Car12
Med23
Lrriq1
Ppp3cc
Faxc
Inadl
Bspry
Slc22a18
Med20
Firre
Cdc14b
Armc2
Akap12
Fbxl21
Nrgn
Gfy
1810043G02Rik
Zfp526
Ubn1
Slc29a3
Syncrip
Arhgef10
Irak1
Cbarp
Plekhb1
Sh3bp4
Anks1
Gls
Pitpnb
Sh3tc2
Unc93b1
Gm44596
Mapre3
Rif1
AW554918
Wnk4
1700109H08Rik
B130024G19Rik
Adgrg3
1110004F10Rik
Gm42906
Tfdp1
Ism2
Rab10os
Gnmt
Nexn
Ptprv
Arsk
Atr
Icmt
Usp34
Mysm1
Ccdc62
Pdgfrb
Zfp811
Naglu
Tjap1
Gemin7
Spata6
Alg9
Vstm2l
D430036J16Rik
Mrpl55
Ppp4r1l-ps
Axl
4930570G19Rik
Clock
Ptpn6
Sh3d21
Ankrd13b
Ccdc38
Impdh2
Dhx30
Ablim2
Abca4
Ttll10
Atp8a2
Unc13b
Cyp27a1
Macc1
Itpr1
Anks1b
Slc2a9
Asb7
Zfp740
Caprin2
Mdm2
Pot1b
Tcaf1
Tmem54
Fam151b
Brd8
Vegfb
Ttll13
Lat
Rcbtb1
Gm10785
Lin7a
Kcne3
Ikzf1
Arl13b
Wdr78
Echdc2
Cep295
Trdmt1
Dmc1
Akap17b
Ap3m1
Hp1bp3
Muc4
Dock6
Zfp947
Enox2
Tmprss6
Slc24a2
Arhgap29
Ulk2
Pomgnt1
Trim33
Inpp4b
Rsl24d1
Rfng
Rbfox2
Ly6h
Ywhag
Ppp1r3b
Pqlc3
Yipf2
Phactr2
Mtmr1
Spint1
Lcorl
Sez6l2
Zfp202
Nod1
Mcrs1
Casp8ap2
Hlx
Ttc13
Smim22
Nhsl2
Ppp1r12b
Cttn
Polm
C030048H21Rik
Vav3
Ppih
Ccdc157
RP23-218K15.5
Prdm5
Nipal2
C230035I16Rik
Amph
Zbtb49
A630001G21Rik
2310035C23Rik
Cacnb4
Tex40
Csnk1g1
Eif2a
0610010K14Rik
Col13a1
Arhgef7
Narfl
Mgmt
Cttnbp2
Trp53bp1
Scamp5
Slc38a7
Grik4
Nacc2
Cenpt
Rpl10
Zfp1
Nbeal2
Pla2g3
Rbbp6
AI606473
Ccdc191
2610020H08Rik
Coq8a
Isl1
Col25a1
Ppp1r16a
Dnaaf5
Lrr1
1700010I14Rik
Cpsf3l
Fau
Pdzd4
Eml5
Prdm2
Caps2
Zfp442
Cnot1
Itgb3bp
Rgs22
Eya2
Dnajc11
Csnk2a2
Iqsec1
Fign
Gripap1
Dcaf11
Tmem168
Zdhhc3
Ube3a
4930520O04Rik
Pum1
Gm3696
Cds1
Rad51
Scn2a1
Stx3
Pex11a
Cd36
Pld3
Cbx8
A930005H10Rik
Csgalnact1
Rundc3b
Hook3
Lgals8
Mbtps1
U2af1l4
Ttll5
Stard9
Spopl
Paox
Homer1
Patz1
Atf7ip2
Zzz3
Hsd3b7
Snph
Ubr4
Rbm12b2
Suv420h1
Eva1c
Taf6l
Airn
Pcmtd1
Dimt1
Susd2
Angel1
Hnrnpk
Apc
Polb
Tube1
Edrf1
Pnpla6
Tyk2
Zfp120
Slitrk4
Aasdhppt
Acbd5
Mrpl23
Zfp420
Ccl25
Ankrd13d
U2af1
Vcp
Med14
Socs2
Alg6
Rab2b
Rpl5
Zfp286
Apol7d
Nfyc
Mrps18b
Garnl3
Polk
Il2rg
Zfp672
Syt14
Nlk
Nrros
Pck2
Hivep2
Capn15
2900076A07Rik
Adamts17
Cenpa
Zfp638
AC149090.1
Zfp568
0610010F05Rik
Pgk1
Ankrd45
A730017C20Rik
Gpatch2
Txndc11
Gm26782
Ctnna2
Ago4
Tro
Gm20324
Cdc14a
Mbtd1
Eif2s3x
Zfp558
Acox1
Uckl1
Btd
Trim68
Pelp1
Tmpo
Abcc1
Zfand4
Rims1
Hars2
Homer2
2010109A12Rik
Tmlhe
Dlgap4
Ifi27
Gnb1l
Ccm2
Tead4
Ccdc15
Pfkfb1
Gnaz

## Sheet: gene annotation
NE.layer genes GO_BP
Term	Overlap	P-value	Adjusted P-value	Odds Ratio	Combined Score	Genes
vesicle-mediated transport (GO:0016192)	61/411	4.84611e-06	0.0247297	1.80229	22.0552	DENND1C;DENND1B;DENND1A;GOLGA4;ZFYVE27;TOM1;KIF1B;DENND5A;ERC1;KIF1A;VPS39;AGFG2;CSNK1G3;BCAS3;RUBCN;APLP2;ARAP2;SCRIB;CSNK1D;TC2N;MAPK8IP3;DNM1;SYTL2;DNM2;BIN1;RIN3;AMPH;TBC1D23;RAB7B;SFT2D1;CSNK1G1;NAPB;TMEM87B;DCTN1;GOSR2;CLEC16A;AGAP1;DENND3;LRP8;KALRN;STX11;CUX2;VPS51;MYO6;ATP6V1H;STX3;STX2;EVI5;RAB11FIP3;SPAG9;GIT2;MYO5A;SYT14;HOOK3;SYT7;PIKFYVE;SNX16;RAB12;SPIRE1;SMAP1;PICALM
regulation of microtubule polymerization (GO:0031113)	12/36	1.80216e-05	0.0306547	4.04776	44.2175	CAMSAP3;CLIP1;NUMA1;DCTN1;MAP2;AKAP9;ABL1;SLAIN2;MAPT;CLASP1;EML2;CDK5RAP2
axonogenesis (GO:0007409)	38/224	1.50962e-05	0.0385179	2.06002	22.8685	ROBO2;CYFIP1;BRSK2;ATL1;NRXN1;PTPRO;DOCK7;SEMA3F;EFNA5;GLI2;ROBO1;PPP3CB;KIF3A;SLITRK4;NRCAM;NCAM1;APBB1;CTNNA2;SLIT2;PAK3;SPTAN1;PDLIM7;NTNG2;AUTS2;GFRA1;ANK3;L1CAM;ISL1;GFRA2;POU4F1;GFRA4;ENAH;DAB1;PARD3;ADGRB1;ULK2;EVL;FGFR2
establishment or maintenance of epithelial cell apical/basal polarity (GO:0045197)	11/34	5.51437e-05	0.0401997	3.92871	38.5233	CAMSAP3;DLG1;MTCL1;DLG4;PARD3;ERBIN;LIN7A;SCRIB;ANK1;MYO9A;MARK2
regulation of microtubule-based process (GO:0032886)	10/27	3.19032e-05	0.0407005	4.49752	46.5619	ATAT1;CAMSAP3;MACF1;PHLDB1;APC;MAPT;EFNA5;BICD1;CLASP1;CLASP2
regulation of microtubule cytoskeleton organization (GO:0070507)	9/23	4.80063e-05	0.0408294	4.75172	47.252	CAMSAP3;ATAT1;PHLDB1;MAPT;EFNA5;BICD1;CLASP1;SKA2;CLASP2
regulation of adherens junction organization (GO:1903391)	8/18	4.28982e-05	0.0437819	5.39702	54.2761	CAMSAP3;MACF1;SLK;DAPK3;EFNA5;ADD1;GPM6B;CLASP1
microtubule anchoring at microtubule organizing center (GO:0072393)	6/11	9.933e-05	0.0563201	6.62361	61.0503	NIN;CCDC120;KIF3A;DCTN1;HOOK3;BICD1
regulation of cell-substrate junction assembly (GO:0090109)	7/15	9.02516e-05	0.0575693	5.66687	52.775	CAMSAP3;MACF1;SLK;DAPK3;EFNA5;GPM6B;CLASP1
stress-activated protein kinase signaling cascade (GO:0031098)	16/71	0.000171149	0.0727812	2.73652	23.7337	STRADA;STRADB;MAPKAP1;MINK1;SLK;STK25;NEK1;CCM2;TNIK;PAK3;MAP2K7;MAP3K7;MAP3K4;MAP2K5;MAP4K3;MAP4K4
establishment of spindle orientation (GO:0051294)	8/21	0.000159395	0.073945	4.62602	40.4504	GPSM2;NUMA1;DCTN1;MAP4;CENPA;CLASP1;CDK5RAP2;NDEL1
lamellipodium organization (GO:0097581)	9/26	0.000146303	0.0746584	4.20345	37.1157	CYFIP1;CCDC88A;ABLIM2;ABLIM3;CTTN;PTPRO;SPATA13;ARHGEF7;ARHGEF6
regulation of microtubule polymerization or depolymerization (GO:0031110)	7/18	0.000357899	0.0869694	4.72239	37.4734	CAMSAP3;MAP2;ABL1;MAPT;CLASP1;SKA2;CLASP2
regulation of axon extension (GO:0030516)	10/35	0.000377375	0.0875337	3.46951	27.3476	MACF1;GOLGA4;PTPRS;ZFYVE27;CTTN;ABL1;NRCAM;MAPT;L1CAM;DNM2
neuron projection morphogenesis (GO:0048812)	27/164	0.000402767	0.0893618	1.9992	15.6281	BRSK2;ATL1;DOCK7;MAP2;SLITRK4;EPB41L3;MAP6;NRCAM;SLIT2;APBB1;CTNNA2;PAK3;MAP4K4;MEF2A;NTNG2;MINK1;ANK3;POU4F1;DNM2;CTTN;STK25;DLG4;PARD3;ADGRB1;TNIK;KIF20B;FGFR2
establishment or maintenance of apical/basal cell polarity (GO:0035088)	7/18	0.000357899	0.0913178	4.72239	37.4734	DLG1;MTCL1;DLG4;PARD3;ERBIN;SCRIB;MARK2
microtubule nucleation (GO:0007020)	7/17	0.000235398	0.0924028	5.00018	41.7727	GOLGA2;AKAP9;SLAIN2;CSNK1D;CLASP1;NDEL1;CLASP2
cytoskeleton organization (GO:0007010)	23/127	0.000260925	0.0951073	2.19918	18.146	SUN1;MAST4;DST;MAST3;MICAL3;MICAL2;ANK3;ANK1;SYNE2;PLD2;FGD2;PCLO;FMNL2;BIN1;MICAL1;ZMYM5;EPB41L3;PACSIN3;FLNB;QRICH1;TNIK;WASF3;SIPA1
regulation of cell-matrix adhesion (GO:0001952)	13/53	0.000281984	0.095931	2.97854	24.3456	CCL25;MACF1;DAPK3;MINK1;CASK;EFNA5;CAMSAP3;SLK;ADAM15;CD36;NF2;CLASP1;GPM6B
establishment of mitotic spindle localization (GO:0040001)	7/18	0.000357899	0.096124	4.72239	37.4734	GPSM2;NUMA1;DCTN1;CENPA;CLASP1;CDK5RAP2;NDEL1
microtubule anchoring at centrosome (GO:0034454)	5/9	0.000357689	0.101405	6.74627	53.5374	NIN;CCDC120;KIF3A;DCTN1;HOOK3
regulation of cation transmembrane transport (GO:1904062)	9/31	0.000647769	0.103299	3.52547	25.8839	DLG1;KCNE3;HOMER1;KCNIP2;SLMAP;ATP2B4;CACNA1D;KCNN2;KCNAB2
positive regulation of microtubule polymerization (GO:0031116)	8/25	0.000628901	0.103525	3.88585	28.6447	CLIP1;NUMA1;DCTN1;AKAP9;SLAIN2;MAPT;CLASP1;CDK5RAP2
lamellipodium assembly (GO:0030032)	8/23	0.000330847	0.105519	4.22375	33.8485	CYFIP1;CCDC88A;ABLIM2;ABLIM3;PTPRO;SPATA13;ARHGEF7;ARHGEF6
positive regulation of microtubule polymerization or depolymerization (GO:0031112)	8/25	0.000628901	0.106976	3.88585	28.6447	CLIP1;NUMA1;DCTN1;AKAP9;SLAIN2;MAPT;CLASP1;CDK5RAP2
cell morphogenesis involved in neuron differentiation (GO:0048667)	19/98	0.000357607	0.107345	2.35431	18.684	MEF2A;NTNG2;BRSK2;ATL1;DOCK7;MINK1;ANK3;POU4F1;MAP2;PARD3;SLITRK4;ADGRB1;MAP6;NRCAM;APBB1;SLIT2;CTNNA2;PAK3;FGFR2
establishment of mitotic spindle orientation (GO:0000132)	6/14	0.000519875	0.110538	5.20427	39.3543	GPSM2;NUMA1;DCTN1;CENPA;CDK5RAP2;NDEL1
receptor clustering (GO:0043113)	8/25	0.000628901	0.110665	3.88585	28.6447	DLG1;DLG4;NRXN1;MAGI2;NRXN2;FLNA;MADCAM1;SCRIB
regulation of muscle cell differentiation (GO:0051147)	10/37	0.000615234	0.112126	3.28197	24.2653	MEF2A;SPAG9;RBM4;ABL1;BNIP2;CTNNA2;HDAC9;MAPK12;FGFR2;CDON
Wnt signaling pathway, calcium modulating pathway (GO:0007223)	10/37	0.000615234	0.116279	3.28197	24.2653	TNRC6C;TCF7L2;MOV10;PPP3CB;AGO4;LEF1;FZD6;NLK;MAP3K7;TNRC6A
regulation of protein localization to cell cortex (GO:1904776)	4/6	0.000600221	0.117805	8.09553	60.0543	GPSM2;NUMA1;EPB41;EPB41L2
regulation of extent of cell growth (GO:0061387)	4/6	0.000600221	0.122517	8.09553	60.0543	CTTN;ABL1;NRCAM;DNM2
regulation of focal adhesion assembly (GO:0051893)	11/45	0.000842518	0.130284	2.96836	21.0134	CAMSAP3;MACF1;BCAS3;COL16A1;SLK;DAPK3;ABL1;EFNA5;GPM6B;CLASP1;CLASP2
NE.layer genes GO_MF
Term	Overlap	P-value	Adjusted P-value	Odds Ratio	Combined Score	Genes
microtubule binding (GO:0008017)	46/196	5.58965e-11	6.43369e-08	2.84996	67.2804	MACF1;NUMA1;MTCL1;DCTN1;KIF17;SKA2;GOLGA2;POLB;HAUS8;MAP2;KIF3A;MAP6;KIF21A;KIF1B;KIF21B;MAP4;KIF1A;DNM1L;CLASP1;CDK5RAP2;NDEL1;CLASP2;DST;SGIP1;STARD9;KIF24;HOOK3;EML2;DNM1;DNM2;EML4;CCDC88B;CAMSAP3;EML5;CCDC88A;CLIP1;KIF2A;STIM1;FAM161A;APC;MAPRE3;MAPT;KIFC3;KIF20B;TPT1;MDM1
Ras GTPase binding (GO:0017016)	38/185	1.17481e-07	6.76104e-05	2.4943	39.8015	DENND1C;DENND1B;MAPKAP1;DENND1A;CLEC16A;BICD1;YBX3;STRN3;RIMS2;RIMS1;RABGEF1;AP3M1;RUSC2;XPO4;KIF3A;TBC1D13;SH3BP4;FLNA;STXBP5;EVI5L;ERC1;DNM1L;RAB11FIP3;EVI5;UNC13B;YIPF2;DAPK3;RANBP17;MYO5A;NUTF2;MYO9B;RABGGTB;DMXL2;PIH1D2;RIN3;RAPGEF6;OPTN;PICALM
tubulin binding (GO:0015631)	46/256	3.79513e-07	0.000145606	2.182	32.2595	NUMA1;MTCL1;DCTN1;STMN4;KIF17;PHF6;SKA2;GOLGA2;POLB;HAUS8;MAP2;KIF3A;MAP6;KIF21A;KIF1B;KIF21B;MAP4;KIF1A;DNM1L;CLASP1;CDK5RAP2;NDEL1;CLASP2;BCAS3;SGIP1;STARD9;KIF24;HOOK3;EML2;DNM1;DNM2;EML4;CCDC88B;EML5;CCDC88A;CLIP1;KIF2A;FAM161A;APC;MAPRE3;MAPT;KIFC3;KIF20B;ALDOA;TPT1;MDM1
guanylate kinase activity (GO:0004385)	8/13	1.83689e-06	0.000528565	7.47279	98.6965	MPP2;MPP3;DLG1;DLG4;MAGI3;CASK;SCRIB;KIF20B
Rab GTPase binding (GO:0017137)	26/131	2.11572e-05	0.00487039	2.41012	25.9414	DENND1C;DENND1B;DENND1A;CLEC16A;BICD1;RIMS2;RIMS1;RABGEF1;AP3M1;RUSC2;KIF3A;TBC1D13;STXBP5;EVI5L;ERC1;DNM1L;RAB11FIP3;EVI5;UNC13B;YIPF2;MYO5A;RABGGTB;DMXL2;RIN3;OPTN;PICALM
microtubule plus-end binding (GO:0051010)	7/13	2.78982e-05	0.0053518	6.5387	68.571	CLIP1;DST;NUMA1;APC;STIM1;CLASP1;CLASP2
Rab guanyl-nucleotide exchange factor activity (GO:0017112)	14/52	5.55962e-05	0.0079989	3.26935	32.0311	DENND1C;DENND1B;DENND5B;DENND1A;DENND4C;DENND3;RABGEF1;ST5;MADD;DENND5A;RIN3;TRAPPC13;SBF1;SBF2
protein serine/threonine kinase activity (GO:0004674)	53/369	4.90919e-05	0.00807211	1.74416	17.3052	CCNT1;MAST4;MAST3;CCNC;SLK;CHEK2;AKT2;TLK2;NEK1;MAP3K7;MAP3K4;CSNK1G3;STRADA;STRADB;DAPK3;MINK1;CSNK1D;CIT;MAPKAPK3;CSNK2B;ULK2;SGK3;TNIK;ALPK1;CSNK1G1;BRSK2;CAMK2D;WNK4;NLK;PRKCZ;IRAK1;PHKG2;PAK3;MAP2K7;MARK3;MAP4K3;MAP2K5;MARK2;MAP4K4;EIF2AK1;DCLK2;CDC7;CDC42BPA;CLK4;MAPK12;CDK8;SNRK;WNK1;STK25;WNK2;AAK1;BMPR1B;ATR
phosphatidylinositol phosphate 4-phosphatase activity (GO:0034596)	5/7	6.86418e-05	0.00877852	8.67378	83.1521	INPP4A;INPP4B;SYNJ1;OCRL;SYNJ2
cadherin binding (GO:0045296)	46/314	9.36952e-05	0.00980393	1.77895	16.5006	MACF1;DOCK9;CTNND1;HDLBP;CAPG;ENO1;PARK7;ADD1;GOLGA2;SLK;MPRIP;EPB41L1;MYO6;EIF4H;FLNA;ARFIP1;FLNB;CTNNA2;LRRFIP1;ERC1;PROM1;SPTAN1;MARK2;TMPO;EIF2A;UNC45A;NOP56;SH3GLB2;SCRIB;CSNK1D;ANK3;PRDX6;KTN1;PPFIBP1;DLG1;MYO1B;HNRNPK;FMNL2;CTTN;EEF1D;ABI1;NUMB;ITGA6;ALDOA;PICALM;PLEC
phosphatidylinositol-3,5-bisphosphate phosphatase activity (GO:0106018)	7/15	9.02516e-05	0.010388	5.66687	52.775	MTMR1;MTMR2;PIKFYVE;SYNJ1;OCRL;SYNJ2;MTMR4
phosphatidylinositol binding (GO:0035091)	20/101	0.000188142	0.0166578	2.40461	20.6275	DENND1C;SCARB1;DENND1B;NUMA1;PLEKHA1;EPB41;PITPNB;DENND1A;ITPR1;NOXO1;RUNDC3B;WDR35;CCDC88A;SH3PXD2A;SNX16;PARD3;MCF2L;WDFY3;MAPT;PICALM
motor activity (GO:0003774)	18/86	0.000187835	0.0180165	2.54162	21.807	DYNC2H1;DYNC1I2;STARD9;KIF24;MYO5A;MYO9B;KLC1;KIF17;MYO1B;KIF2A;KIF3A;MYO6;KIF1B;KIF21A;KIF1A;KIF21B;KIFC3;KIF20B
actin binding (GO:0003779)	38/255	0.000258733	0.0212715	1.80959	14.9467	CYFIP1;MACF1;ARPC1A;HPCA;NEXN;ESPN;PPP1R9A;AIF1;SYNE2;ADD1;ABLIM2;ABLIM3;MICAL1;MYO6;ABL1;MYO18A;FLNA;MYH14;FLNB;SYNPO;CAP2;PHACTR4;TPM3;MICAL3;MICAL2;MYO9B;SORBS1;MTSS1;AIF1L;CAMSAP3;CCDC88A;CEACAM1;MYO1B;BIN1;KCNMA1;MAPT;LCP1;ALDOA
protein kinase activity (GO:0004672)	65/514	0.000344317	0.0220172	1.53563	12.245	CCNT1;MAST4;MAST3;CCNC;SLK;EEF2K;AKT2;CHEK2;FGFR1OP2;TLK2;NEK1;MAP3K7;MAP3K4;PDGFRB;CSNK1G3;STRADA;STRADB;DAPK3;MINK1;NRG1;CSNK1D;TYK2;CIT;MAPKAPK3;IL3RA;CSNK2B;ULK2;SGK3;TNIK;ALPK1;CSNK1G1;BRSK2;CAMK2D;WNK4;NLK;PRKCZ;CSF2RA;IRAK1;PHKG2;ABL1;MAP2K7;PAK3;MARK3;MAP2K5;MAP4K3;MARK2;MAP4K4;STAT5A;DCLK2;CDC7;CDC42BPA;CLK4;MAPK12;CDK8;SNRK;STK25;WNK1;AXL;WNK2;AAK1;BMPR1B;FGFR3;FGFR2;ATR;FGFR1
nucleotide kinase activity (GO:0019201)	8/23	0.000330847	0.0224003	4.22375	33.8485	MPP2;MPP3;DLG1;DLG4;MAGI3;CASK;SCRIB;KIF20B
Rho guanyl-nucleotide exchange factor activity (GO:0005089)	14/60	0.000292227	0.0224235	2.83343	23.0584	VAV3;ARHGEF11;ARHGEF10;ARHGEF12;ARHGEF19;ARHGEF10L;KALRN;VAV2;FGD2;MCF2L;SPATA13;ARHGEF7;ECT2;ARHGEF6
high voltage-gated calcium channel activity (GO:0008331)	6/13	0.00031928	0.0229682	5.6046	45.1139	CACNB1;CACNB3;CACNB4;CACNA1A;CACNA1D;CACNA1C
phosphotransferase activity, phosphate group as acceptor (GO:0016776)	11/42	0.000446757	0.0270641	3.18039	24.5319	MPP2;MPP3;DLG1;PPIP5K2;DLG4;MAGI3;CASK;SCRIB;NME5;KIF20B;IP6K2
voltage-gated calcium channel activity (GO:0005245)	10/38	0.000774035	0.0445457	3.1956	22.893	RYR1;CACNB1;CACNB3;CACNB4;CACNA2D1;CACNA1A;CACNA1D;CACNA1C;TPCN2;CACNA1G
NE.age genes GO_BF
Term	Overlap	P-value	Adjusted P-value	Odds Ratio	Combined Score	Genes
regulation of alternative mRNA splicing, via spliceosome (GO:0000381)	8/40	0.000105517	0.179485	5.29101	48.4478	HNRNPL;MBNL1;TRA2B;CELF4;RNPS1;HNRNPA1;SRSF6;RBM5
vesicle-mediated transport (GO:0016192)	32/411	9.82777e-05	0.250756	2.05976	19.0069	DCTN1;GOSR2;GCC2;FNBP1L;ZFYVE27;TOM1;CPNE1;KIF1B;STX3;KIF1A;GPRASP1;STX2;RAB11FIP3;VPS39;CSNK1G3;BCAS3;GIT2;ARAP2;MYO5A;SCRIB;SYT14;CSNK1D;RBSN;MAPK8IP3;ARFGAP1;SYT7;DNM1;PIKFYVE;SNX16;BIN1;TBC1D23;CSNK1G1
stress-activated protein kinase signaling cascade (GO:0031098)	11/71	6.76885e-05	0.345415	4.09867	39.3496	MAP4K1;SLK;FBXW11;STK25;NRK;MAPKAP1;MINK1;CUL1;MAP3K7;MAP3K4;MAP4K3
production of miRNAs involved in gene silencing by miRNA (GO:0035196)	6/29	0.000644733	0.411259	5.47345	40.2117	ZC3H7A;AGO4;METTL3;HNRNPA2B1;PUM1;TARBP2
axon extension (GO:0048675)	5/20	0.000735414	0.41698	6.61376	47.7188	CYFIP1;AUTS2;ULK2;SEMA3F;SLIT2
aggrephagy (GO:0035973)	3/6	0.000987601	0.419977	13.2275	91.5375	WDR81;UBQLN1;WDFY3
activation of protein kinase activity (GO:0032147)	20/234	0.000604409	0.440614	2.26111	16.7577	MAP4K1;MAPKAP1;NRK;MINK1;PARK7;ATG13;SLK;MAPKAPK3;IRAK1;STK25;MADD;RAPGEF1;ABL1;PTK2B;ECT2;MAP3K7;CARD14;MAP4K3;MAP3K4;MARK2
actin filament-based transport (GO:0099515)	4/10	0.000354409	0.452138	10.582	84.0747	MYO5A;FNBP1L;MYO19;SYNE2
regulation of mRNA splicing, via spliceosome (GO:0048024)	9/61	0.000447508	0.456726	3.9032	30.1008	HNRNPL;MBNL1;TIA1;TRA2B;CELF4;RNPS1;SRSF6;HNRNPA1;RBM5
regulation of protein localization to cell cortex (GO:1904776)	3/6	0.000987601	0.458157	13.2275	91.5375	NUMA1;EPB41;EPB41L2
plasma membrane bounded cell projection organization (GO:0120036)	13/119	0.000567655	0.482791	2.89004	21.6002	CYFIP1;PLEKHA1;DOCK7;ZFYVE27;FAM161A;CTTN;MAP2;NEDD4;TBC1D24;TBC1D23;MAP4;MAPT;STX3
regulation of extent of cell growth (GO:0061387)	3/6	0.000987601	0.503973	13.2275	91.5375	CTTN;ABL1;NRCAM
NE.age genes GO_MF
Term	Overlap	P-value	Adjusted P-value	Odds Ratio	Combined Score	Genes
MAP kinase kinase kinase kinase activity (GO:0008349)	5/11	2.9098e-05	0.0334918	12.025	125.599	MAP4K1;STK25;NRK;MINK1;MAP4K3
microtubule binding (GO:0008017)	19/196	0.000168844	0.0647798	2.56452	22.2768	NUMA1;DST;MTCL1;SGIP1;DCTN1;KIF24;DNM1;EML4;EML5;FAM161A;MAP2;KIF21A;KIF1B;MAP4;KIF1A;MAPT;KIFC3;TUBGCP4;CLASP2
pre-mRNA binding (GO:0036002)	7/31	0.000127461	0.0733536	5.97372	53.5705	HNRNPL;PRPF39;TRA2B;CELF4;HNRNPA1;SRSF6;TARBP2
small GTPase binding (GO:0031267)	9/64	0.000642656	0.184924	3.72024	27.3434	GIT2;PEX5L;MAPKAP1;PEX5;ARAP2;RAB11FIP3;ARFGAP1;RAP1GAP;FGD2
cadherin binding (GO:0045296)	24/314	0.000908366	0.209106	2.02204	14.1621	NOP56;DOCK9;CTNND1;ARHGAP1;ARHGAP18;SCRIB;CSNK1D;EPS15L1;PARK7;FNBP1L;MYO1B;HNRNPK;SLK;FMNL2;MPRIP;CTTN;NUMB;FLNB;ITGA6;LRRFIP1;PROM1;SPTAN1;MARK2;EIF2A
