# Supplementary material for: An Alternative Splicing Program for Mouse Craniofacial Development
Source: Front Physiol. 2020 Sep 4;11:1099. doi: 10.3389/fphys.2020.01099 (PMC7498679; doi:10.3389/fphys.2020.01099)
Supplement: Supplementary file 10 [file Table_10.xlsx]

## Sheet: moRBP_expression_ngr3813list_fi
Gene	Common_name	E10.5_FNP_ecto_1	E10.5_FNP_ecto_2	E10.5_FNP_ecto_3	E10.5_FNP_mesen_1	E10.5_FNP_mesen_2	E10.5_FNP_mesen_3	E10.5_MdP_ecto_1	E10.5_MdP_ecto_2	E10.5_MdP_ecto_3	E10.5_MdP_mesen_1	E10.5_MdP_mesen_2	E10.5_MdP_mesen_3	E10.5_MxP_ecto_1	E10.5_MxP_ecto_2	E10.5_MxP_ecto_3	E10.5_MxP_mesen_1	E10.5_MxP_mesen_2	E10.5_MxP_mesen_3	E11.5_FNP_ecto_1	E11.5_FNP_ecto_2	E11.5_FNP_ecto_3	E11.5_FNP_mesen_1	E11.5_FNP_mesen_2	E11.5_FNP_mesen_3	E11.5_MdP_ecto_1	E11.5_MdP_ecto_2	E11.5_MdP_ecto_3	E11.5_MdP_mesen_1	E11.5_MdP_mesen_2	E11.5_MdP_mesen_3	E11.5_MxP_ecto_1	E11.5_MxP_ecto_2	E11.5_MxP_ecto_3	E11.5_MxP_mesen_1	E11.5_MxP_mesen_2	E11.5_MxP_mesen_3	E11.5_Nasal_epi_1	E11.5_Nasal_epi_2	E11.5_Nasal_epi_3	E12.5_FNP_ecto_1	E12.5_FNP_ecto_2	E12.5_FNP_ecto_3	E12.5_FNP_mesen_1	E12.5_FNP_mesen_2	E12.5_FNP_mesen_3	E12.5_MdP_ecto_1	E12.5_MdP_ecto_2	E12.5_MdP_ecto_3
ENSMUSG00000000167	Pih1d2	3.00149	2.84978	2.78526	2.72046	2.58213	2.76788	2.97643	2.88792	2.82912	2.05241	2.27294	2.29425	3.12299	3.00702	2.77832	1.63768	2.60377	2.59567	2.50158	2.33547	2.49747	1.82713	2.17166	1.92143	2.67875	2.52503	2.64088	1.94351	2.13172	2.24914	2.35943	2.7234	2.48243	1.85632	1.94269	2.04442	2.70368	2.75655	2.57358	2.46222	2.40481	2.45021	1.84938	1.64021	2.10288	2.84284	2.39102	2.51447
ENSMUSG00000000275	Trim25	2.83379	2.73675	2.69455	1.78198	1.56488	2.01976	2.11939	2.00844	1.92748	1.26741	1.33503	1.5981	2.21718	2.2769	2.17851	1.52347	1.47853	1.43883	1.84478	1.81319	1.90836	2.10346	2.16293	1.93503	2.2487	2.28891	2.18994	2.06805	1.91755	1.78054	2.00711	1.99625	2.02987	1.89348	2.0347	1.78031	3.49165	3.40576	3.37311	1.78632	1.98227	1.87631	1.88353	2.01175	1.83347	2.10389	2.21214	2.18992
ENSMUSG00000000339	Rtca	5.92041	5.97762	6.00329	6.18845	6.4177	6.10224	5.8885	5.79944	5.81932	6.25917	6.25	6.19619	5.56247	5.70198	5.67534	6.2992	6.20248	6.34279	5.42052	5.46188	5.53668	5.93205	5.95616	5.88312	5.57208	5.61437	5.52521	5.98779	6.01179	5.99767	5.55282	5.58131	5.60139	6.00028	5.97345	5.96047	5.93613	5.92376	5.91124	5.28909	5.30933	5.05516	5.6148	5.73768	5.5082	5.3763	5.35877	5.28705
ENSMUSG00000000838	Fmr1	5.75536	5.8586	5.85042	6.1843	6.02424	6.24883	6.18942	6.25981	6.55782	6.31573	6.53901	6.51826	6.38469	6.51239	6.31978	6.61076	6.60329	6.73116	6.04716	6.005	6.06746	6.28802	6.09118	6.01776	5.81127	5.7177	5.91159	6.21851	5.96238	6.16134	5.8141	5.76011	5.87468	6.26365	6.23455	6.19044	5.78857	5.74096	5.59902	5.77728	5.64527	5.69851	6.18337	6.19268	6.12539	5.67273	5.55737	5.65578
ENSMUSG00000000948	Snrpn	2.56111	2.40555	2.51475	2.31688	0.917431	2.25848	2.95554	2.91317	3.07168	2.21225	2.05401	2.37188	2.92589	3.02835	2.9373	1.82578	2.15688	2.20371	2.4636	2.6321	2.47375	2.04396	1.92608	1.99957	2.5464	2.54993	2.84505	2.03468	1.9964	2.11581	2.7371	2.53725	2.42172	2.27405	2.14241	2.17319	2.88629	2.66231	2.43104	2.69641	2.52732	2.90743	2.11926	1.96092	1.44939	2.70843	2.04305	2.50604
ENSMUSG00000001016	Ilf2	8.11359	8.25546	8.25537	8.58021	8.82538	8.64577	8.13006	8.17022	8.23504	8.56596	8.52311	8.55819	8.10817	8.14099	8.14004	8.68783	8.65146	8.76865	7.97298	7.88948	7.98632	8.27204	8.34558	8.17436	7.97058	7.89975	7.90238	8.19839	8.10403	8.22271	8.01558	8.02235	8.05814	8.35123	8.24991	8.36686	8.02726	8.00025	7.87916	7.78135	7.7269	7.69553	7.90921	7.81426	8.01256	7.7665	7.82991	7.73992
ENSMUSG00000001056	Nhp2	7.42837	7.32686	7.28744	7.50328	7.91764	7.38209	7.42212	7.25289	7.10861	7.54842	7.60944	7.42717	6.97211	7.02564	6.99111	7.79604	7.63967	7.71048	6.89996	6.74361	7.06245	6.39893	6.65533	6.46351	6.98411	6.88625	6.9523	6.7872	6.68101	6.90334	6.9687	6.90962	7.02759	6.64449	6.48165	6.82434	7.03857	6.94987	7.05625	7.05874	6.98949	6.95351	6.16718	6.30617	6.30675	6.95546	6.8092	6.89684
ENSMUSG00000001120	Pcbp3	4.55518	4.63658	4.32478	5.09577	4.89544	4.96166	4.29813	4.15331	4.15555	5.0375	4.79339	4.71961	4.16295	4.20324	4.14573	4.88439	4.79781	4.41907	3.24588	3.27873	3.32345	4.76379	4.66317	4.64532	3.43591	3.6465	3.38726	4.44364	4.57163	4.49626	3.6011	3.6368	3.62357	4.5087	4.43082	4.34691	4.2798	4.16528	4.08711	3.34451	3.47753	3.64794	4.6721	4.29121	4.58681	3.48837	3.62304	3.56156
ENSMUSG00000001305	Rrp15	6.15209	6.26838	6.21787	6.42914	6.91164	6.52262	6.10975	6.17145	6.30333	6.60034	6.56336	6.58156	5.99755	6.1007	6.00438	6.77695	6.60192	6.71684	5.69636	5.62697	5.69408	5.6263	5.68642	5.64338	5.80388	5.76173	5.85221	5.93937	5.89899	5.97872	5.73137	5.80486	5.87507	5.7972	5.66345	5.74171	5.92523	5.86439	5.89919	5.65342	5.60504	5.46115	5.43684	5.47769	5.41152	5.71228	5.65476	5.61968
ENSMUSG00000001440	Kpnb1	8.75707	8.87708	8.76521	8.91375	8.80639	8.89321	8.42179	8.55971	8.63625	8.88418	9.0426	8.94308	8.45827	8.62537	8.40173	9.07566	9.07176	9.04243	8.17911	8.18937	8.1729	8.29645	8.30388	8.25584	8.07026	8.03267	8.10828	8.28474	8.1975	8.29886	8.11966	8.11266	8.18889	8.20618	8.31101	8.26551	8.37155	8.38281	8.32517	8.1029	8.1004	8.15374	8.12861	8.16482	8.20255	8.16698	8.1957	8.1614
ENSMUSG00000001569	Nom1	4.87057	5.05824	4.93375	4.78443	5.07519	5.19855	5.29119	5.09301	5.05943	4.84496	5.07709	5.16699	4.69865	4.87472	4.7402	5.37634	5.14884	5.336	4.96039	4.8511	4.94169	4.74166	4.86366	4.592	5.22838	5.02722	5.16122	4.96632	4.68427	4.88022	5.0046	5.00717	5.16522	4.86501	4.70123	4.66126	4.98425	4.88488	4.91031	4.52925	4.3109	4.56654	4.15769	4.21979	4.36048	4.86999	4.61808	4.42089
ENSMUSG00000001674	Ddx18	6.21408	6.39804	6.33114	6.67773	6.81579	6.69508	6.18306	6.31477	6.25143	6.53983	6.45362	6.48264	6.00825	6.1821	6.03206	6.75323	6.76795	6.67697	6.05612	6.19166	6.11318	5.9649	5.87556	6.02027	6.02792	6.14751	6.005	6.08557	5.92958	5.96302	6.1529	6.19264	6.11922	6.03996	6.04246	6.04449	6.22371	6.02132	6.09513	5.80157	5.80162	5.81433	5.58018	5.62045	5.61354	5.869	5.85923	5.73063
ENSMUSG00000001707	Eef1e1	6.57876	6.65079	6.80383	6.6604	7.08149	6.87376	6.75133	6.87312	7.03866	6.67405	6.6946	6.711	6.84599	6.77729	6.86965	6.50006	6.91793	7.09229	7.09444	6.9278	6.97842	6.02906	6.03757	6.09746	7.02673	6.95389	6.97574	6.08601	6.18942	6.24177	7.13787	7.05428	7.11213	6.27333	6.00388	6.29328	6.58238	6.53452	6.4791	7.09392	6.98363	6.91608	5.87532	5.86104	5.85117	6.99574	7.0892	6.98946
ENSMUSG00000002107	Celf2	5.06939	5.30061	5.15428	2.40729	1.31983	2.72835	5.05922	5.3622	5.31027	2.52892	2.62064	2.70984	5.36586	5.42631	5.51033	1.83792	2.87053	3.12733	5.05385	5.06876	4.87468	3.28112	3.09534	2.917	5.36355	5.37285	5.18175	4.13334	3.8167	3.35274	5.41607	5.4012	5.28907	3.28655	3.36369	3.04903	5.14299	5.26268	5.14127	4.89226	4.91402	4.94584	3.80037	4.03173	3.86857	5.60304	5.63598	5.62734
ENSMUSG00000002227	Mov10	4.69511	4.66275	4.4299	4.20308	3.903	4.01029	4.65714	4.56002	4.34841	4.94846	4.86656	4.85549	4.57165	4.50959	4.55238	4.24315	4.24562	4.15511	4.24996	4.03842	4.05907	4.76711	4.63844	4.64044	4.7716	4.7429	4.54117	5.2765	5.2106	5.24537	4.5689	4.48557	4.48699	4.95188	4.87002	4.84093	5.51518	5.39127	5.30776	4.17525	4.32714	4.56566	4.53134	4.8338	4.81946	4.52001	4.63094	4.7835
ENSMUSG00000002477	Snrpd1	8.52379	8.60637	8.4944	8.88898	9.37661	9.12951	8.63181	8.72842	8.88326	9.04287	9.43905	9.16214	8.46245	8.66867	8.53336	9.40723	9.09571	9.48863	8.36313	8.30662	8.40171	8.33946	8.46252	8.32171	8.42407	8.39637	8.47179	8.41929	8.35308	8.52056	8.43004	8.38509	8.6784	8.43719	8.35794	8.59813	8.2507	8.25805	8.16662	8.33094	8.40895	8.2977	8.08198	8.06373	8.16141	8.51163	8.44307	8.398
ENSMUSG00000002625	Akap8l	4.44877	4.38239	4.36367	4.19548	4.20199	4.24289	4.41391	4.40173	4.34827	4.16386	4.22351	4.18862	4.45673	4.62251	4.60256	4.35825	4.32993	4.31842	4.29	4.2543	4.3665	4.61826	4.48215	4.41326	4.48984	4.37708	4.54392	4.22997	4.13439	4.20599	4.33199	4.35787	4.47572	4.53638	4.46813	4.27326	4.43238	4.43332	4.39615	4.40982	4.48202	4.63273	5.10394	5.07892	5.29808	4.52147	4.5658	4.66371
ENSMUSG00000002825	Qtrt1	5.17704	5.137	5.12052	5.20274	5.22641	5.01776	5.61516	5.47151	5.12876	5.27016	5.2025	5.15071	5.16227	5.25069	5.23276	5.26383	5.18672	5.15141	4.70948	4.62193	4.82883	4.49483	4.75135	4.56986	5.06797	5.01217	4.8881	4.83701	4.89223	4.86171	4.99591	4.96183	4.87099	4.71503	4.60928	4.76111	4.96394	4.96779	4.93842	4.51535	4.69637	4.61614	4.29247	4.42116	4.29306	4.89054	4.8732	4.80171
ENSMUSG00000003235	Eif2b5	6.42588	6.34155	6.24891	6.32231	7.10667	6.41789	6.3804	6.25635	6.25047	6.4033	6.54739	6.36707	6.1049	6.24162	6.11711	6.57286	6.3926	6.47782	6.20531	6.14264	6.3331	6.20917	6.32059	6.13745	6.31244	6.2829	6.28946	6.2176	6.1119	6.25236	6.28727	6.28531	6.32635	6.28393	6.28147	6.32427	6.39399	6.33841	6.30833	5.85218	5.88565	5.90827	5.6228	5.69567	5.74424	5.91644	5.94782	5.93109
ENSMUSG00000003410	Elavl3	4.45171	4.60872	4.65195	1.53165	1.60276	1.39074	0.0928838	0.0488615	0.0631771	0.0985629	0.0822235	0.105272	0.188798	0.186873	0.228372	0.725275	1.64322	0.264823	0.357445	0.44426	0.435678	0.556154	0.353884	0.545836	0.0202853	0.0659933	0.0468835	0.0934516	0.160643	0.196973	0.0726201	0.138425	0.116015	0.462535	0.297305	0.201587	5.84137	5.80261	5.67526	0.140861	0.170257	0.130891	1.30824	1.9214	1.18955	0.04968	0.0593388	0.053162
ENSMUSG00000003429	Rps11	10.4595	10.6576	10.473	10.6887	11.0565	10.8065	10.6474	10.5916	10.5194	10.8846	11.0659	10.7587	10.3855	10.4504	10.4224	10.5007	10.7242	10.9325	10.9658	10.8209	10.9823	10.7944	10.9153	10.8274	11.0666	10.9522	11.0343	11.0293	10.9934	10.9642	11.0235	11.013	11.0619	11.0074	10.8347	10.9187	10.99	10.8976	10.8515	10.2756	10.335	10.4968	9.81235	9.86594	10.0141	10.4092	10.4758	10.4021
ENSMUSG00000003814	Calr	9.90646	9.77676	9.63358	9.8105	9.98739	9.75316	9.75776	9.65819	9.66135	9.76182	9.97721	9.77367	9.57761	9.63879	9.49213	9.96913	9.765	9.91884	9.41961	9.54373	9.37753	9.70924	9.74357	9.44669	9.09282	9.12361	8.95802	9.53149	9.52989	9.32199	9.28635	9.42238	9.28263	9.60695	9.68687	9.55435	9.42901	9.52566	9.22289	9.40945	9.4251	9.52165	9.84743	9.80343	9.97301	9.3488	9.43851	9.30669
ENSMUSG00000003868	Ruvbl2	7.05492	7.04531	6.97016	7.14327	7.17047	7.07747	7.17856	6.98494	6.77278	7.16144	7.24279	7.07458	6.76388	6.84841	6.7981	7.41293	7.14071	7.13088	6.75521	6.62562	6.81433	6.64908	6.73536	6.68719	6.71994	6.72506	6.70728	6.78802	6.77793	6.7728	6.78262	6.80383	6.81031	6.80818	6.70077	6.79896	7.05901	6.97873	6.95542	6.31974	6.45319	6.54407	5.99337	6.19239	6.13933	6.41953	6.40419	6.5579
ENSMUSG00000003923	Tfam	6.67549	6.81196	6.77683	6.82928	6.91841	6.9681	6.59439	6.85552	7.11492	6.91461	7.12979	6.89208	6.7036	6.67975	6.67238	6.70504	6.95303	6.91458	6.57067	6.50978	6.52013	6.53522	6.57201	6.49973	6.76665	6.54513	6.83537	6.67064	6.62216	6.65043	6.67032	6.6559	6.86316	6.62072	6.59018	6.59421	6.74214	6.73162	6.7453	6.19694	6.11626	6.13707	5.92184	5.91736	5.70455	6.30876	6.3658	6.06919
ENSMUSG00000004044	Ptrf	1.3089	1.14407	1.18425	3.8293	3.57466	3.7854	2.64364	2.50969	2.54273	3.39439	3.27252	3.31806	1.72042	1.54397	1.58225	3.33076	3.29225	3.29437	3.7878	3.70271	3.70095	4.34798	4.29724	4.00539	4.27645	4.22986	4.11198	4.20898	3.96981	4.04872	3.5471	3.44403	3.12276	3.95246	3.87256	3.6758	1.82805	1.89799	1.39894	4.81214	5.11879	4.89946	5.9997	6.25975	6.09166	5.16948	5.31316	5.30259
ENSMUSG00000004127	Trmt10a	4.15784	4.53386	4.37067	4.56706	4.28059	4.76108	4.26921	4.61915	4.49313	4.45923	4.6467	4.73476	4.43349	4.62904	4.53177	4.72124	4.5376	4.77338	4.30718	4.18429	4.18515	3.80269	3.80655	3.86279	4.09293	4.06333	3.99282	3.83198	3.85636	3.78511	4.1968	4.23117	4.30447	3.70963	3.74135	3.72769	4.11348	4.16907	3.95135	4.17659	3.81494	3.95442	3.81389	3.84322	3.41824	4.03566	3.92342	3.79885
ENSMUSG00000004233	Wars2	2.69783	2.82774	2.88146	3.31755	2.9537	3.26278	3.49167	3.80268	3.6444	2.94208	2.89502	3.12461	3.29568	3.41	3.41053	3.18192	3.06745	2.9324	3.04462	3.07696	3.13643	3.17352	3.1453	3.07898	3.19964	3.23335	3.17831	3.21571	3.09912	3.15124	3.06202	3.06794	3.02768	3.39645	3.33369	3.2094	2.77555	2.66354	2.6243	2.89644	2.87635	2.88867	2.97701	3.03724	2.77448	3.09482	3.13072	3.01698
ENSMUSG00000005846	Rsl1d1	7.84849	8.0369	7.97356	8.43585	8.84795	8.54368	7.70228	7.87405	8.07434	8.34727	8.44902	8.43308	7.77315	7.84202	7.74977	8.54852	8.5404	8.66826	7.56247	7.47786	7.56207	7.62072	7.61251	7.55887	7.70284	7.6065	7.70028	7.66689	7.62507	7.72363	7.62333	7.63148	7.74318	7.65668	7.5658	7.63665	7.73175	7.65328	7.63464	7.66275	7.58605	7.54846	7.44405	7.39398	7.44806	7.74214	7.70516	7.56425
ENSMUSG00000006281	Tep1	1.66424	1.55808	1.44114	1.57268	1.02443	1.44463	2.08791	2.081	1.85834	1.38004	1.38733	1.21948	1.91319	2.09821	2.02488	1.49191	1.44424	1.24557	2.43713	2.4957	2.48702	1.7584	1.70353	1.73353	2.27707	2.31183	2.30673	1.2685	1.1425	1.30432	2.25152	2.32911	2.27252	1.37912	1.63504	1.48916	1.54303	1.53838	1.5596	1.92658	1.97248	2.16053	1.35315	1.37093	1.45987	1.78959	1.75481	1.94603
ENSMUSG00000006782	Cnp	3.53005	3.32366	3.41767	3.16473	3.47519	3.37459	3.59658	3.4567	3.29528	3.28925	3.0048	3.18538	3.69943	3.59809	3.56652	3.4938	3.25764	2.94333	3.42134	3.51005	3.56548	4.0377	4.06349	3.891	3.63302	3.68496	3.57948	4.16828	3.89308	4.0385	3.55054	3.53897	3.60413	4.4528	4.28796	4.33216	4.10662	4.09336	3.98561	2.86013	3.08595	3.03659	3.94862	4.16745	4.12639	2.81214	3.06843	2.98125
ENSMUSG00000007050	Lsm2	7.98938	7.9197	7.78649	8.3399	8.3049	8.29968	8.02145	7.97288	7.55672	8.29286	8.18096	8.17749	7.64536	7.44382	7.8953	8.23182	8.21407	8.34693	7.03332	7.01389	7.1057	7.0855	7.26359	7.18592	6.9979	7.19641	7.03014	7.14326	7.12875	7.27382	7.13247	7.09746	7.06644	7.26223	7.30232	7.3622	7.04	7.09145	7.05659	7.02088	7.01653	6.92463	6.90471	6.685	7.02896	6.83849	6.86953	6.97474
ENSMUSG00000007892	Rplp1	12.3329	11.9922	12.1512	12.3968	12.9678	12.3848	12.1219	11.7438	11.6763	12.1811	11.79	12.0766	11.8881	11.7327	11.8197	12.499	12.2231	11.9927	11.8374	11.5346	11.7554	11.7634	12.0832	11.93	11.9277	11.7914	12.0249	11.792	11.8552	11.8806	11.9122	11.9343	11.8937	11.8594	11.5647	11.9316	11.9673	11.9294	11.9029	11.9517	11.9755	11.7767	11.6348	11.745	11.646	12.1663	12.1129	12.0231
ENSMUSG00000008333	Snrpb2	6.80275	7.11941	7.19853	7.45053	7.77041	7.76049	6.76362	6.96913	7.31669	7.42868	7.66184	7.71076	6.90664	7.06448	6.97731	7.5821	7.71223	7.92748	6.8408	6.63084	6.71787	7.23741	7.13735	7.07505	6.77581	6.67586	7.02835	7.29351	7.09165	7.31578	6.89506	6.76857	7.06391	7.27773	7.06597	7.44528	7.05593	7.02145	6.95744	6.74555	6.65567	6.69889	6.85949	6.8799	6.85353	6.87823	6.82087	6.63854
ENSMUSG00000008393	Carhsp1	6.50522	6.40841	6.50232	6.40885	6.47197	6.4153	6.77708	6.63992	6.58232	7.07623	6.84721	6.94565	6.56749	6.48908	6.56651	6.76409	6.76147	6.80146	6.20707	6.06358	6.22326	6.31862	6.46454	6.34315	6.71003	6.69911	6.69375	6.80267	6.79154	6.88428	6.51393	6.50298	6.59283	6.70238	6.61308	6.77229	6.72653	6.65729	6.64643	5.78877	5.80223	5.68313	5.80306	5.88781	5.92031	6.01009	6.0442	6.01773
ENSMUSG00000008489	Elavl2	4.85688	5.11013	5.12023	2.44919	1.25386	2.46574	2.66282	2.85515	3.05107	3.10057	2.88145	2.73232	3.78782	3.66444	3.67111	2.8092	3.65486	2.88155	2.78066	2.67393	2.82965	2.70732	2.35963	2.27745	2.34503	2.17694	2.49897	2.4525	2.2614	2.42284	2.67935	2.93372	2.96226	2.63228	2.3544	2.6117	5.56559	5.3324	5.27811	2.0891	1.94281	1.93777	2.22759	2.4037	2.06623	1.81375	1.65013	1.47131
ENSMUSG00000008658	Rbfox1	0.368135	0.453036	0.423848	0.541395	0.250433	0.335343	0.484515	0.196457	0.13385	0.802901	0.922549	0.984211	0.510393	0.428216	0.387078	0.558963	0.555392	0.350988	0.417769	0.393773	0.372443	0.509038	0.381892	0.387481	0.536873	0.560968	0.655799	0.933524	0.79495	0.734551	0.622717	0.526565	0.46926	0.471603	0.370006	0.318028	0.299168	0.373048	0.419953	0.68338	0.600678	0.638251	0.503359	0.488098	0.500923	0.51868	1.04932	0.840551
ENSMUSG00000009470	Tnpo1	6.58284	6.68406	6.59209	6.70282	6.10809	6.7454	6.55616	6.61137	6.61343	6.55718	6.75106	6.65356	6.51534	6.60696	6.47794	6.62528	6.79533	6.81605	6.54269	6.56171	6.51112	6.40241	6.28888	6.31887	6.42944	6.49222	6.5378	6.3632	6.3221	6.36395	6.48352	6.48601	6.49662	6.38175	6.54225	6.4222	6.45662	6.48124	6.45149	5.95994	5.93408	5.96355	5.89487	5.90011	5.8125	5.95909	5.84001	5.92549
ENSMUSG00000009535	Rnmt	5.78277	5.89519	5.94187	5.76695	5.63332	5.86987	5.66234	5.79093	5.96296	5.70088	5.7965	5.78313	5.79944	5.86336	5.72774	6.31818	6.04315	6.04884	5.74828	5.6929	5.74754	5.36828	5.51454	5.38337	5.70624	5.68343	5.63595	5.39447	5.29587	5.43928	5.78474	5.71296	5.83926	5.51966	5.53269	5.54216	5.78185	5.75545	5.60342	5.59728	5.34103	5.35434	5.18515	5.01914	4.77153	5.46808	5.43531	5.18639
ENSMUSG00000009927	Rps25	7.67462	7.9567	7.71429	8.03149	8.30535	8.37378	7.8721	8.11777	8.10823	8.33095	8.50521	8.29703	7.70316	8.00264	7.8303	7.81148	8.2948	8.61398	8.25964	7.98343	8.23275	8.018	8.09466	7.77464	8.41782	8.4349	8.42091	8.1378	7.93061	7.95982	8.40331	8.30559	8.56276	8.09138	7.72941	7.9726	8.18289	8.1125	7.94169	7.80744	7.98347	7.99598	7.24892	7.34542	7.41298	8.07745	8.05918	8.07517
ENSMUSG00000010362	Rdm1	3.98764	3.9915	4.05716	3.38407	4.02146	3.48698	4.73871	4.42635	4.28995	4.1396	3.97206	4.09484	4.30592	4.2301	4.41562	3.96321	3.52695	3.76116	4.96816	4.67976	4.87683	4.56357	4.52652	4.27143	5.04526	4.98801	5.05176	4.75341	4.54638	4.51619	5.01868	5.08871	5.03609	4.86071	4.54651	4.57845	4.28959	4.29615	4.08021	4.66148	4.57681	4.75864	4.57168	4.72434	4.78037	4.995	4.76955	4.73602
ENSMUSG00000010755	Cars	5.37427	5.32069	5.43091	5.60366	6.01258	5.78481	5.3086	5.14723	5.15541	5.43665	5.44428	5.38072	5.04652	5.13431	4.94025	5.62196	5.64048	5.62037	4.70091	4.621	4.81525	5.03374	4.99471	5.00765	4.74456	4.62818	4.69761	4.98502	4.83761	4.95717	4.77847	4.79509	4.80561	5.02241	4.96023	4.95709	5.15186	5.10317	5.05983	4.73963	4.69885	4.79153	4.59835	4.7341	4.91896	4.54662	4.63927	4.75367
ENSMUSG00000011257	Pabpc4	6.73871	6.75884	6.60769	6.78295	6.44184	6.81678	6.80349	6.56405	6.12994	6.9854	6.81954	6.58516	6.32878	6.22504	6.42019	6.80506	6.81613	6.75689	6.09397	5.92039	6.35925	6.35634	6.53037	6.33886	6.33223	6.45249	6.37652	6.67627	6.6012	6.53256	6.37833	6.28081	6.4004	6.53653	6.40213	6.47626	6.61349	6.59839	6.60102	5.68242	5.99027	5.5801	5.83122	5.93162	5.6309	5.95609	5.85866	6.12388
ENSMUSG00000013415	Igf2bp1	6.37404	6.45644	6.3911	6.53632	6.10201	6.5373	6.48285	6.48704	6.17925	6.67907	6.70981	6.53575	6.40467	6.47126	6.3185	6.77476	6.5826	6.47328	6.28144	6.30945	6.29851	6.03025	6.07265	6.02991	6.10536	6.1377	6.16764	6.09561	6.0477	6.12355	6.1679	6.2485	6.20186	5.98897	6.3035	6.10138	5.81413	5.93804	5.91841	5.38645	5.39916	5.51929	4.95422	5.06827	4.99543	5.47714	5.27584	5.47469
ENSMUSG00000014329	Bicc1	2.15676	2.208	2.20198	3.1604	2.42126	3.12764	2.35541	2.39502	2.28896	3.482	3.50018	3.35316	2.12255	2.06758	2.10449	3.02409	3.03348	3.03399	2.31996	2.46463	2.43826	4.14861	4.08984	3.91548	2.22337	2.32651	2.19907	4.47898	4.2531	4.18557	2.15288	2.14006	2.0441	3.85411	3.8553	3.61144	2.22687	2.2793	2.04711	2.05183	2.07626	1.9096	5.06757	5.06629	4.86854	1.7197	1.82632	1.62501
ENSMUSG00000014776	Nol3	0.237845	0.265136	0.197401	0.335979	0.0554949	0.174374	0.0536708	0.0400687	0.190457	0.0715264	0.0424636	0.12195	0.0480866	0.128176	0.0976926	0.0546951	0.257466	0.263452	0.15932	0.308565	0.136965	0.582562	0.545151	0.414459	0.292829	0.271864	0.204471	0.660381	0.586754	0.47927	0.185945	0.363173	0.19801	0.799973	0.723601	0.706103	0.595414	0.55491	0.57629	0.378371	0.535428	0.371234	1.14296	1.14708	1.2092	0.51349	0.557725	0.39763
ENSMUSG00000014907	Naf1	4.6164	4.67246	4.50043	4.335	4.46398	4.41619	4.4159	4.43441	4.67232	4.31388	4.43214	4.41151	4.48604	4.47281	4.48574	4.53917	4.60036	4.59862	4.11709	4.25561	4.41504	3.7965	3.70899	3.6912	4.349	4.64959	4.52033	3.94559	3.80656	3.97642	4.45418	4.46577	4.4765	4.06091	4.11533	4.12874	4.39992	4.52315	4.48172	4.17756	4.2257	4.07962	3.53284	3.5964	3.44827	4.12286	4.05802	4.28672
ENSMUSG00000015176	Nolc1	6.28853	6.54043	6.37551	6.79935	6.86476	6.67497	6.37367	6.49597	6.45018	6.7864	6.82343	6.75991	6.27115	6.43914	6.27819	6.90262	6.88119	6.81342	6.14042	6.10925	6.24481	5.96959	5.99854	5.94904	6.25754	6.18928	6.17986	6.15666	5.87536	6.15796	6.23729	6.19776	6.22514	6.00116	6.00917	6.03815	6.14184	6.04021	6.05208	6.18619	6.24258	6.37411	5.76127	5.84505	5.97536	6.20646	6.19744	6.34836
ENSMUSG00000016018	Skiv2l2	6.34973	6.43877	6.37568	6.64448	6.51254	6.77703	6.42403	6.43903	6.57104	6.64164	6.77385	6.73774	6.30176	6.39744	6.28384	6.71485	6.75832	6.86615	6.08895	5.98641	6.04168	6.3179	6.25761	6.2581	6.16059	6.09104	6.13222	6.33311	6.23603	6.28559	6.09904	6.0699	6.16841	6.38715	6.22048	6.30092	6.21335	6.15774	6.07456	5.85545	5.85244	5.73519	5.97627	5.98015	5.83337	5.87223	5.97712	5.84212
ENSMUSG00000016349	Eef1a2	0.538172	0.533824	0.500823	0.166293	0	0.220819	0	0.121694	0	0.0395212	0.0771667	0.0679838	0.0164149	0.0180236	0.0169053	0	0.0168821	0	0.136439	0.132573	0.164781	0.171815	0.16126	0.228084	0	0.0190625	0	0.0517976	0.0389078	0.0839961	0.0313369	0	0.0567994	0.244944	0.120168	0.0919863	2.44037	2.31114	2.29135	0.0336636	0.0663777	0.106597	0.422284	0.985395	0.486014	0	0	0.019486
ENSMUSG00000016503	Gtf3a	6.77831	6.78164	6.7645	6.35131	6.51734	6.37395	6.75004	6.76821	6.75925	6.60393	6.43597	6.43304	6.61254	6.64516	6.63812	6.37896	6.40056	6.41005	6.55955	6.5986	6.74983	5.71847	5.93507	5.73896	6.66553	6.80795	6.60358	6.13419	6.05871	6.12349	6.62809	6.68221	6.76978	5.91294	5.92884	6.0076	6.64258	6.68284	6.67558	6.36651	6.54353	6.26146	5.54574	5.63242	5.59612	6.40516	6.53644	6.61699
ENSMUSG00000016833	Mrps18c	6.30789	6.78157	6.6471	6.78301	7.69285	7.04327	6.29105	6.57294	6.70819	6.99408	6.89434	6.96117	6.49227	6.38532	6.34795	6.85326	7.01543	7.14495	6.5359	6.27683	6.40881	6.57334	6.78496	6.59088	6.40266	6.36361	6.33619	6.64123	6.52894	6.74928	6.56405	6.38814	6.47485	6.73863	6.43427	6.83418	6.41568	6.47272	6.38295	6.39009	6.24926	6.18692	6.03179	6.08493	5.94205	6.24938	6.34338	6.17616
ENSMUSG00000017146	Brca1	4.76281	4.97391	4.73852	5.11831	4.4235	5.01705	4.8479	4.89139	4.97433	4.97833	5.06612	4.86426	4.82262	4.85285	4.63804	5.1578	4.96135	4.9909	4.49362	4.5272	4.44584	4.63128	4.63503	4.55469	4.53713	4.47639	4.37487	4.52084	4.49761	4.50774	4.55019	4.5297	4.48118	4.42858	4.6579	4.48607	4.55914	4.60954	4.51421	4.318	4.16433	4.13895	4.08894	4.01782	3.89071	4.28332	4.27913	4.20524
ENSMUSG00000018405	Mrm1	4.15596	3.10525	3.42968	2.63942	2.80303	2.82054	4.21147	3.14989	3.88676	2.57617	2.43674	2.52614	2.96186	2.99488	3.21018	2.56338	2.37743	2.30148	3.87325	3.95476	4.13213	3.0724	2.82717	3.19044	4.16527	4.1101	4.1081	3.5964	2.70333	3.00638	3.98552	3.90724	4.00148	2.45454	2.5139	2.59099	4.08501	3.90924	4.16848	3.93457	4.24422	3.84427	2.7973	2.76714	2.62911	4.29706	3.9817	4.12305
ENSMUSG00000018446	C1qbp	8.32894	8.27897	8.24896	8.61888	9.02604	8.65233	8.21325	8.18642	8.27013	8.61414	8.74642	8.69882	8.07686	8.03119	7.91858	8.66341	8.62049	8.73115	7.91553	7.87181	8.02714	7.83243	7.93093	7.86199	8.00981	8.03277	8.1041	8.02764	7.97314	8.12691	8.01096	7.96739	8.136	7.91834	7.82927	8.07177	8.0628	8.06297	8.08172	8.08916	8.10554	8.19807	7.49527	7.56488	7.63665	8.15521	8.09711	8.09108
ENSMUSG00000018554	Ybx2	5.324	5.19078	5.19208	3.43679	3.25742	3.27576	4.97491	4.62692	4.75123	3.5894	3.33501	3.93052	5.0791	5.19132	5.31613	3.11059	3.08803	2.94439	4.52713	4.6664	4.60333	4.53009	4.52034	4.17622	4.50322	4.38265	4.38826	4.40061	4.28596	4.42948	4.74386	4.80166	4.7145	4.41128	4.31753	4.36027	4.97252	5.00623	5.08921	4.88127	5.05001	5.07954	4.82537	4.93474	5.21144	5.20634	4.479	5.21977
ENSMUSG00000018727	Cpsf4l	0.473721	0.107315	0.349214	0	0	0.323091	1.14553	1.12503	0.986364	0.26267	0.270196	0.105964	0.487599	0.753828	0.518229	0	0.0309232	0.0350193	0.32179	0.384704	0.149578	0.107094	0.140383	0.0379769	0.693702	0.752773	0.909067	0.0942458	0.171795	0.179168	0.712514	0.524397	0.633171	0.134656	0.0706623	0.131043	0.231104	0.132061	0.258747	0.79701	0.936097	0.686393	0.0871289	0.0324377	0.109788	0.978767	0.896655	0.908197
ENSMUSG00000018848	Rars	7.26321	7.3871	7.38142	7.68911	7.84684	7.70966	7.31529	7.28588	7.37806	7.53772	7.58988	7.6155	7.18737	7.24141	7.20701	7.6032	7.66498	7.71377	6.75463	6.63891	6.63196	6.79569	6.75934	6.79927	6.79935	6.69665	6.76053	6.83835	6.81474	6.86748	6.75629	6.73932	6.80431	6.82291	6.77439	6.81482	6.86953	6.80778	6.80474	6.81524	6.78614	6.77302	6.71603	6.65675	6.72837	6.92989	6.95026	6.85903
ENSMUSG00000019039	Dalrd3	5.65324	5.4543	5.56103	5.28118	5.48801	5.25887	5.6296	5.40155	5.32761	5.15849	5.16241	5.20045	5.53555	5.40823	5.44864	5.10872	5.38359	5.32555	5.35189	5.09859	5.24223	5.17227	5.3274	5.11566	5.29687	5.39259	5.23138	5.23299	5.11008	5.18065	5.38427	5.40495	5.43884	5.18717	5.04783	5.10948	5.82682	5.66093	5.73006	5.76229	5.8857	6.11132	5.38411	5.4778	5.86612	5.80571	5.78283	6.05764
ENSMUSG00000019732	Calr3	0.971424	0.578397	1.04126	0.604701	1.38231	1.16298	1.05987	0.847538	1.01155	0.91924	0.881839	0.956078	1.08539	1.02058	0.75855	0.576255	0.708961	0.929844	0.646568	0.627021	0.615647	0.739449	0.725415	0.66398	0.79627	0.740212	0.787495	0.803211	0.589655	0.656341	0.839983	0.819327	0.778548	0.901493	0.677468	0.612586	0.903188	0.819579	0.75682	0.684836	0.646718	0.595918	0.755215	0.896237	0.820083	0.854317	0.715638	0.751457
ENSMUSG00000019774	Mtrf1l	3.88477	4.10943	3.82715	4.28348	5.15325	4.25776	3.95717	4.04666	4.48257	3.86341	3.94295	4.10827	4.18538	4.10854	3.88748	4.11498	4.0204	4.46537	3.75362	3.64957	3.49417	4.17143	3.96752	3.88068	3.99678	3.74517	4.01873	3.88978	4.03103	3.83323	4.0053	3.92218	3.82109	4.04723	3.94594	3.8423	3.8996	3.82641	3.58994	3.72904	3.76664	3.53593	4.08888	3.96354	4.0863	4.10779	4.11612	4.01408
ENSMUSG00000019791	Hint3	2.78103	2.92702	2.98325	2.53849	2.43984	2.77117	2.70966	2.68295	2.85226	2.58176	2.82265	2.83635	2.69834	2.71175	2.50714	2.78928	2.73622	2.58716	2.92988	2.74038	2.55528	3.22474	3.03571	3.02165	3.02669	3.20374	3.16255	3.45112	3.34693	3.51773	3.07553	2.70719	2.95864	3.25231	3.2758	3.3404	3.45634	3.63522	3.49134	2.40149	2.69261	2.2088	2.18998	2.65707	2.22086	2.61388	2.56026	2.52649
ENSMUSG00000019792	Trmt11	3.7418	3.8985	3.87175	4.24086	4.2756	4.35196	3.81649	3.90977	4.10652	4.06942	4.24662	4.14661	3.68446	3.79438	3.72667	4.48372	4.2911	4.51207	3.49319	3.41961	3.59608	3.86187	3.79448	3.77667	3.83543	3.68943	3.90865	3.79601	3.83036	3.79832	3.6178	3.61094	3.85522	3.9911	3.80374	3.87459	3.77637	3.64835	3.69478	3.6068	3.33167	3.47072	3.76353	3.79553	3.81623	3.82492	3.79462	3.55751
ENSMUSG00000019808	Adat2	3.10703	3.33773	3.30067	3.56541	3.59365	3.68477	3.01201	3.21485	3.11913	3.48798	3.48415	3.46867	3.0753	3.19536	3.18915	3.62987	3.50651	3.4575	3.00413	2.93629	3.11431	3.33127	3.30001	3.2598	3.23904	3.28495	3.17367	3.37489	3.0874	3.41212	3.15577	3.24343	3.08604	3.18847	3.17259	3.29765	3.37516	3.44769	3.25993	2.71173	2.86699	2.55849	2.87258	2.95748	2.80997	2.92094	2.9633	2.99801
ENSMUSG00000020075	Ddx21	6.5099	6.68422	6.54316	6.97449	6.7984	6.96664	6.3691	6.52154	6.5382	6.79442	6.95163	6.81047	6.30477	6.44168	6.23591	7.06712	7.062	7.03639	6.40786	6.36153	6.42431	6.21931	6.18961	6.18054	6.47475	6.36612	6.45726	6.29432	6.22481	6.29928	6.41601	6.39277	6.44191	6.21322	6.25489	6.19074	6.28982	6.27756	6.2714	6.39219	6.30146	6.34248	6.0905	6.14389	5.96932	6.36471	6.34529	6.22733
ENSMUSG00000020116	Pno1	6.46205	6.45131	6.53993	6.69605	6.82521	6.77538	6.69823	6.6569	6.8438	6.71317	6.84005	6.72283	6.44247	6.49155	6.44748	6.71604	6.73443	6.73443	6.50657	6.47945	6.61605	5.94082	6.01342	6.04152	6.61018	6.71166	6.65813	6.25935	6.23113	6.34668	6.5797	6.51342	6.62778	6.09799	5.99692	6.10925	6.39409	6.32774	6.34682	6.26901	6.36938	6.07764	5.49214	5.78099	5.39952	6.33975	6.30321	6.31788
ENSMUSG00000020180	Snrpd3	8.2019	8.1993	8.19642	8.64777	8.85253	8.73469	8.35075	8.33694	8.5073	8.60086	8.64467	8.77532	8.26362	8.46149	8.25819	8.97152	8.77017	9.01674	7.28035	7.22244	7.29355	7.22499	7.28976	7.10508	7.25864	6.97735	7.31711	7.26572	7.17417	7.35595	7.18523	7.26494	7.43709	7.23747	7.24304	7.35861	7.11719	7.09776	6.9638	7.90758	7.75067	7.68462	7.85912	7.60388	7.86499	7.96453	8.02221	7.75203
ENSMUSG00000020262	Adarb1	2.13086	2.11735	2.15409	2.45038	1.79698	2.73954	2.23235	2.03171	2.36194	2.33491	2.11582	2.34058	2.22944	2.16629	2.44113	2.12658	2.41692	2.57216	1.80457	1.83877	1.85915	2.47613	2.33472	2.38302	2.29788	2.26724	2.26625	2.09057	2.23891	2.18869	1.98445	2.11071	2.00397	2.06909	2.27205	2.0655	2.11106	2.05433	1.95409	1.66179	1.83223	1.61897	2.55105	2.38662	2.09781	2.26488	2.13843	2.02078
ENSMUSG00000020280	Pus10	6.22324	6.27271	6.19519	6.29777	5.39873	6.48223	6.02238	6.3128	6.48678	6.27682	6.37731	6.39785	6.16641	6.30356	6.16352	6.18387	6.31959	6.63031	5.44195	5.17971	5.08891	5.25055	5.2892	5.03697	5.35523	5.18024	5.52582	5.20388	5.14525	5.21374	5.37627	5.0989	5.49272	5.18713	4.99802	5.26351	5.29331	5.20569	4.99766	5.30297	5.12822	4.92293	5.28888	5.16021	4.88927	5.16742	5.41495	5.15209
ENSMUSG00000020300	Cpeb4	2.6058	2.52469	2.34305	2.71292	2.05881	2.62466	1.75217	1.87415	1.84477	2.11155	2.01229	1.91855	2.05178	1.92997	1.96766	2.23538	2.39959	2.28791	2.60713	2.7137	2.61812	2.68032	2.45742	2.3331	2.30907	2.33921	2.16818	2.45396	2.15625	2.19792	2.28595	2.33793	2.30414	2.36058	2.47075	2.21746	3.12195	3.10445	3.00368	2.6795	2.60265	2.67648	2.49529	2.26546	2.38447	2.23769	2.1692	2.31948
ENSMUSG00000020430	Pes1	6.54603	6.8047	6.82167	7.00683	6.63179	6.96298	6.52551	6.75421	6.72608	6.95517	6.99671	6.95021	6.49748	6.75666	6.67234	6.60403	7.05682	7.15868	6.31983	6.26904	6.39588	6.02419	6.14523	6.00089	6.34044	6.34464	6.31315	6.20881	5.99917	6.20843	6.34217	6.25025	6.37012	6.12476	6.02586	6.20122	6.36297	6.22704	6.23765	6.29915	6.38523	6.28306	5.92193	6.11018	5.86943	6.33513	6.41993	6.3821
ENSMUSG00000020464	Pnpt1	5.16367	5.15384	5.0346	5.57238	5.51998	5.67114	5.18432	5.18697	5.4128	5.82429	6.01322	5.88464	4.95295	5.09629	4.94563	5.85154	5.9479	6.07557	4.75333	4.71817	4.82545	4.88189	4.85494	4.67922	4.88637	4.8902	4.98282	4.96456	4.92477	4.98324	4.8899	4.86123	4.88999	4.97766	4.88823	4.89857	4.74156	4.7543	4.58053	4.88357	4.83573	4.77435	4.85351	4.74488	4.62826	4.97834	4.97161	4.80981
ENSMUSG00000020514	Mrpl22	6.4051	6.42684	6.28143	6.58057	6.86834	6.78917	6.45108	6.45023	6.38242	6.7272	6.86253	6.77492	6.26884	6.32996	6.3938	6.69876	6.66623	6.84217	5.91216	5.62219	5.87262	5.97748	6.13021	5.99868	6.00656	5.90353	5.71972	6.13846	5.93386	6.06324	5.98035	5.85213	6.03335	6.00287	5.73128	6.02992	5.84764	5.79754	5.78246	6.13216	6.19798	6.19276	6.00481	6.20267	6.18848	6.07972	6.18839	6.15487
ENSMUSG00000020547	Bzw2	7.6812	7.80747	7.80567	8.13124	8.3393	8.21342	7.88152	7.95228	8.00302	8.23089	8.25405	8.21789	7.89062	7.97944	7.89505	8.30296	8.30398	8.35223	7.92338	7.87047	7.93383	7.76119	7.82714	7.77061	7.9286	7.92235	7.8941	7.8627	7.80604	7.88387	8.00486	8.00301	8.03981	7.80142	7.72485	7.85541	7.69543	7.64768	7.6075	7.72128	7.8003	7.73011	7.41728	7.49706	7.46159	7.75099	7.80208	7.80943
ENSMUSG00000020706	Ftsj3	6.36581	6.54427	6.41415	6.58775	6.77286	6.55583	6.29654	6.37702	6.31481	6.50164	6.67387	6.47231	6.21593	6.25664	6.16483	6.66944	6.60882	6.62205	5.96666	5.98229	6.05153	5.82555	5.83115	5.78746	6.10299	6.0159	6.17379	5.95394	5.82992	5.90287	6.05743	6.06488	6.14179	5.8561	5.90016	5.84435	6.16431	6.14811	6.10165	5.82014	5.82638	5.91075	5.62414	5.60662	5.73169	6.01118	6.00265	5.9146
ENSMUSG00000020715	Ern1	2.64207	2.59965	2.56493	2.10696	1.72326	2.10497	2.93988	2.89018	2.80196	2.03164	2.12801	1.976	3.1657	3.2244	3.33519	2.25153	1.99517	2.11357	3.14645	3.16114	3.08651	2.4025	2.24192	2.30031	3.39915	3.40688	3.41326	2.28263	2.16275	2.08968	3.70239	3.62856	3.50083	2.10312	2.29928	1.98197	2.65966	2.76508	2.61389	3.13078	3.05738	3.19221	2.56435	2.43187	2.34409	3.20641	3.19647	3.3821
ENSMUSG00000020721	Helz	4.74525	4.66878	4.52878	4.22023	4.5221	3.92875	4.49147	4.23596	4.15199	4.26369	4.06734	3.98727	4.30709	4.38401	4.87446	4.2916	4.16207	3.93145	3.91686	3.96564	3.70572	3.76139	3.6971	3.53472	3.76008	3.80217	3.52843	3.58728	3.37316	3.44942	3.72623	3.73627	3.62275	3.40407	3.90697	3.36912	3.85429	3.85762	3.59584	3.63571	3.65315	3.60396	4.005	3.81014	3.8511	3.47844	3.63445	3.73296
ENSMUSG00000020743	Mif4gd	4.58812	4.60968	4.31111	3.59119	3.75306	3.58024	4.78467	4.61015	4.6682	3.38561	3.21398	3.21312	4.61193	4.69312	4.61633	2.90527	3.22714	3.38909	4.1827	4.18542	4.1819	3.52364	3.62436	3.5241	4.21564	4.26587	4.23547	3.2605	3.22505	3.1394	4.10703	4.18098	4.20257	3.2836	3.34783	3.44792	4.25099	4.1737	4.18866	4.07145	4.17571	4.0873	3.62435	3.69704	3.83333	4.35322	4.36319	4.3856
ENSMUSG00000020929	Eftud2	7.22594	7.25425	7.09303	7.2235	8.04581	7.15012	7.17522	7.08382	6.9228	7.22465	7.27549	7.12527	6.95093	7.01605	6.90949	7.32767	7.22817	7.13015	6.95455	6.92851	7.01602	6.96641	7.10374	7.10266	6.90582	6.90623	6.82784	7.03398	7.00635	7.04713	6.95289	6.99043	7.04397	7.07818	7.08483	7.1085	7.07699	7.07452	7.00396	6.53884	6.8421	6.88784	6.33065	6.45695	6.79204	6.64216	6.69608	6.85201
ENSMUSG00000021018	Polr2h	6.363	6.23268	6.28471	6.17888	6.80182	6.29048	6.23006	6.18045	6.22054	6.35426	6.38801	6.34362	5.97346	6.17622	5.98344	6.66457	6.32661	6.40448	6.1037	6.10494	6.20385	5.98813	6.11917	5.96861	6.29822	6.1658	6.2518	6.23256	6.0115	6.23432	6.3108	6.30686	6.45586	6.08436	5.99906	6.15549	6.41719	6.4194	6.3843	5.72547	5.72709	5.80876	5.34357	5.49296	5.47877	5.87614	5.82579	5.73136
ENSMUSG00000021024	Psma6	8.26644	8.41735	8.41007	8.64744	9.18284	8.81157	8.45368	8.42629	8.56546	8.74099	8.71301	8.75594	8.30415	8.41583	8.35154	8.7944	8.77099	8.92598	8.48649	8.34421	8.45864	8.41672	8.44787	8.36226	8.53477	8.40643	8.44382	8.45442	8.34083	8.53618	8.48951	8.49198	8.5505	8.55479	8.38769	8.53924	8.51297	8.38969	8.283	8.15112	8.08134	8.023	7.82763	7.87918	7.84301	8.15154	8.21159	8.03443
ENSMUSG00000021040	Slirp	6.25881	6.47929	6.45404	6.53161	7.7327	6.94491	6.54554	6.47053	6.61504	6.65957	6.51368	6.79055	6.40744	6.46108	6.30711	6.65927	6.79131	6.76759	6.50415	6.28456	6.40615	6.50777	6.57582	6.44311	6.6485	6.71339	6.5909	6.78848	6.52266	6.85462	6.71019	6.64228	6.68489	6.89617	6.51358	6.82953	6.54642	6.37343	6.36674	6.22178	6.26093	5.9734	5.88811	6.09293	6.00794	6.42288	6.37868	6.47053
ENSMUSG00000021047	Nova1	1.77677	1.94919	1.84127	1.88269	2.02381	1.9708	1.59341	1.63741	1.60898	1.81513	1.82096	1.73529	1.72513	1.59044	1.75805	1.76652	1.86292	1.71433	1.34209	1.2556	1.29278	2.23782	2.04371	2.12037	1.78283	1.73401	1.67148	1.98235	1.90233	1.95056	1.70146	1.58241	1.54846	2.23035	2.25329	2.20785	1.46641	1.52999	1.55137	1.61492	1.59253	1.60764	2.51431	2.35773	2.56382	1.98509	2.04932	2.00327
ENSMUSG00000021116	Eif2s1	6.68963	6.65542	6.65934	6.96155	7.34447	7.23423	6.75542	6.7022	6.9438	7.02424	7.14622	7.15195	6.54136	6.66313	6.52391	7.28575	7.19586	7.36667	6.41667	6.34561	6.42403	6.29518	6.30174	6.21367	6.48861	6.45394	6.5138	6.41206	6.25101	6.45933	6.48438	6.44123	6.54219	6.40552	6.2944	6.41293	6.40935	6.33796	6.23585	6.39547	6.33358	6.20331	6.0063	6.03432	5.86729	6.4693	6.37261	6.26039
ENSMUSG00000021127	Zfp36l1	7.38544	7.53826	7.54807	7.12656	6.96847	7.10936	7.32213	7.35759	7.23993	6.8781	6.83733	6.89702	7.5486	7.43694	7.77601	6.8261	6.84509	6.82282	7.79438	7.7761	7.69052	7.42581	7.29583	7.16427	7.62387	7.67044	7.50873	7.083	6.90129	6.87447	7.71848	7.68184	7.56822	7.31391	7.19657	7.05535	7.53955	7.50148	7.45163	7.79758	7.91842	7.81804	8.06959	7.94198	7.9486	7.76402	8.08823	8.06608
ENSMUSG00000021149	Gtpbp4	6.19769	6.36554	6.26276	6.42546	6.73861	6.59811	6.25634	6.38586	6.53721	6.45498	6.61206	6.50489	6.27066	6.39832	6.25497	6.72894	6.66686	6.74303	6.22371	6.10432	6.23471	6.00022	5.92225	5.96184	6.36076	6.27566	6.42364	6.04532	5.97906	6.04534	6.23052	6.19622	6.35987	5.98591	5.87285	5.98793	6.24619	6.12504	6.12343	6.00215	5.79802	5.7821	5.65375	5.66236	5.52716	6.08965	6.01733	5.84472
ENSMUSG00000021257	Angel1	4.28334	4.06579	3.90766	3.98148	2.97533	3.98357	3.97965	3.90649	3.60782	4.03471	3.58081	3.52228	3.45116	3.63799	3.64477	3.31456	3.48594	3.49134	3.62128	3.49078	3.60355	3.61974	3.56087	3.56217	3.81825	3.67349	3.54135	3.537	3.39914	3.38986	3.62611	3.6522	3.69224	3.28469	3.18632	3.25482	4.05664	4.01711	4.04361	3.38897	3.294	3.42811	3.42292	3.41396	3.47706	3.17621	3.39462	3.37307
ENSMUSG00000021282	Eif5	7.90609	8.00069	8.00364	8.38826	8.14675	8.60592	7.90774	8.04407	8.2316	8.43124	8.4553	8.49374	7.87463	7.95161	7.87963	8.55949	8.49886	8.73415	7.68234	7.57875	7.67295	7.97788	7.90111	7.75473	7.73428	7.67089	7.73726	8.0068	7.89775	8.00851	7.71928	7.66138	7.7681	7.9597	7.95677	7.96368	7.77082	7.78	7.70565	7.22107	6.93324	6.84886	7.51285	7.37343	7.17184	7.27345	7.31874	7.04656
ENSMUSG00000021392	Nol8	4.49584	4.82082	4.71813	4.69905	4.55133	4.85668	4.58968	4.74821	4.84332	4.76631	4.88227	4.87727	4.52209	4.68406	4.51393	4.58259	4.78892	5.01744	4.44589	4.47038	4.35135	4.07374	3.92858	3.82282	4.59221	4.56591	4.52218	4.16603	3.98109	4.15796	4.46871	4.51374	4.42556	4.12849	4.07972	4.0735	4.41301	4.35292	4.23411	4.27975	4.24203	4.13455	3.90567	3.78165	3.68054	4.33671	4.37085	4.23892
ENSMUSG00000021418	Rpp40	4.24961	3.99866	4.01031	4.32631	5.18833	4.53593	4.1044	4.07362	4.37796	4.57532	4.7728	4.62128	4.01196	4.34607	3.98291	4.89015	4.69276	4.67674	4.06846	3.86353	4.22347	3.80591	3.93713	4.22391	4.29539	4.00798	4.24423	4.46582	4.41948	4.77132	4.43539	4.26594	4.24266	4.25727	4.25285	4.32802	4.0094	4.24835	4.18742	3.97061	4.13186	3.96828	3.61589	3.76719	3.6299	4.16629	4.10801	3.99367
ENSMUSG00000021476	Habp4	4.08359	4.01938	4.03974	3.51235	3.512	3.51996	4.39981	4.32126	4.3855	4.00749	3.82182	3.65229	4.11686	4.23272	4.18199	3.75876	3.55459	3.59627	4.39464	4.36422	4.54106	4.03937	4.06634	3.69642	4.24281	4.36617	4.27679	4.30709	4.15505	4.13622	4.22065	4.19806	4.13866	4.13958	3.97482	4.04314	4.19436	4.1591	4.12111	4.04909	4.13309	4.06201	4.34554	4.3916	4.32649	3.8028	4.03257	4.06914
ENSMUSG00000021595	Nsun2	7.50886	7.67456	7.51598	7.80343	7.26189	7.89472	7.79494	7.65686	7.51102	7.63596	7.64817	7.61804	7.32366	7.39367	7.50138	7.78192	7.72018	7.92525	6.95265	6.89792	6.99848	6.52743	6.57102	6.44071	7.07568	6.98698	7.07845	6.671	6.53309	6.68559	6.99487	7.00511	7.0823	6.60139	6.52081	6.59235	6.97735	6.8811	6.82913	6.95927	6.72059	6.68318	6.43376	6.35991	6.17009	6.92878	6.98738	6.80858
ENSMUSG00000021611	Tert	3.24261	3.28064	3.33629	3.02131	2.09132	3.04755	3.73838	3.60945	3.39465	3.21307	3.09104	3.15559	3.61495	3.62045	3.67053	2.98704	3.14063	3.04665	3.20514	3.23377	3.14802	2.95494	2.98419	2.85567	3.45872	3.48213	3.36825	3.09115	2.95839	3.13285	3.44832	3.43668	3.35683	3.05029	2.95348	2.90584	3.08855	3.1181	3.03774	3.06187	3.02943	3.07826	3.12352	3.05443	2.71896	3.24672	3.15608	3.26635
ENSMUSG00000021645	Smn1	6.89008	7.31035	7.27406	7.57698	7.27435	7.40678	7.0778	7.28018	7.14266	7.49967	7.40538	7.40302	7.11835	6.84455	7.31038	7.36311	7.50798	7.57153	6.33873	6.27853	6.45418	6.27185	6.48567	6.40015	6.45285	6.37153	6.2674	6.35647	6.41406	6.67117	6.44309	6.49904	6.40906	6.62707	6.47179	6.56656	6.53242	6.37025	6.42741	6.60444	6.53578	6.60256	6.52696	6.39061	6.53929	6.66759	6.70755	6.71537
ENSMUSG00000021650	Ptcd2	4.8447	4.88992	4.92066	5.21522	5.41361	5.26279	4.79717	4.7685	4.93584	5.25103	5.18476	5.22692	4.71406	4.72723	4.585	5.53629	5.22388	5.40975	4.7032	4.66156	4.79553	4.97613	5.03274	4.97317	4.84617	4.88272	4.89645	5.07282	5.01671	4.96739	4.76882	4.82098	4.79984	5.13054	5.00241	5.12564	5.02845	5.04674	4.92162	4.43736	4.4318	4.29791	4.39092	4.56535	4.48164	4.48662	4.60923	4.52841
ENSMUSG00000021662	Arhgef28	3.12705	3.13428	3.02889	1.2817	0.881839	1.33188	2.18312	2.22494	2.17688	1.52676	1.61287	1.56984	2.83835	2.97314	2.9306	1.76461	1.54337	1.41081	2.36524	2.30262	2.34847	1.99387	1.98346	1.81084	2.64954	2.68175	2.65224	2.05357	1.97981	1.90156	2.63271	2.67275	2.72628	2.1295	2.06855	1.90691	3.36909	3.34811	3.26799	2.0815	2.23965	2.22467	2.17159	2.24425	2.216	1.96615	2.08593	2.09652
ENSMUSG00000021666	Gfm2	5.14599	5.29675	5.25726	5.19941	4.92541	5.00196	5.23309	5.29477	5.21055	5.06462	5.24338	5.07703	5.06197	5.23249	5.11384	5.42568	5.2084	5.1945	5.05129	4.97123	5.07034	4.6593	4.60727	4.43579	5.13051	5.0263	4.97965	4.65585	4.37937	4.59376	4.99889	5.02417	5.0268	4.65457	4.48772	4.66069	4.99116	4.94745	4.87353	4.97749	4.91049	4.86991	4.43325	4.39325	4.3742	4.91927	5.01895	4.95463
ENSMUSG00000021713	Ppwd1	4.874	5.00285	4.97191	5.22466	5.22553	5.52008	5.06986	5.15365	5.29021	5.29822	5.38316	5.40938	4.9939	5.04788	5.03148	5.20481	5.39742	5.51826	4.51461	4.52563	4.51244	4.5946	4.54054	4.58229	4.52937	4.52518	4.52642	4.5915	4.54064	4.57395	4.48418	4.53386	4.57395	4.60696	4.54712	4.4729	4.52327	4.42097	4.36754	4.39449	4.24853	4.27019	4.43071	4.36939	4.32694	4.39423	4.39251	4.28067
ENSMUSG00000021715	Cwc27	4.87938	5.00956	4.90477	5.28664	5.55703	5.30722	4.84658	4.93087	5.0833	5.07068	5.34268	5.26124	4.79512	4.86886	4.83549	5.48757	5.32416	5.54509	4.55569	4.39028	4.44668	4.7712	4.69041	4.68325	4.5689	4.47919	4.54965	4.70052	4.55179	4.67362	4.55626	4.47121	4.53359	4.85728	4.70143	4.77245	4.6307	4.40778	4.47957	4.51543	4.49007	4.47544	4.81654	4.84448	4.93738	4.47468	4.64312	4.62592
ENSMUSG00000021876	Rnase4	3.54556	3.43037	3.56566	2.67668	2.86649	2.70571	4.57884	4.64832	4.61682	2.58341	2.38092	2.41184	5.01628	5.05428	5.139	1.98492	2.76738	2.76775	5.68359	5.5734	5.8577	3.70056	3.52503	3.38308	5.61298	5.50245	5.62788	3.411	3.16382	3.20963	5.6816	5.53674	5.6771	3.21588	2.85811	2.88338	2.90768	2.95651	2.93216	5.40866	5.30816	5.28129	4.13767	3.92855	4.13821	5.00227	5.20718	4.98923
ENSMUSG00000021932	Rnaseh2b	6.01534	6.09348	6.09869	5.86667	6.38665	6.07233	6.11351	6.17213	6.32567	5.82734	5.89132	5.73823	5.92265	6.01048	5.89574	5.86968	5.78326	5.84357	6.05523	5.96374	6.11358	5.47128	5.61125	5.40653	5.96572	5.82505	6.07714	5.6402	5.46531	5.6285	5.76084	5.80211	5.96934	5.63343	5.51924	5.64498	6.08782	6.0578	6.02364	5.66548	5.58227	5.52749	4.92444	4.9993	5.10603	5.60624	5.63806	5.55488
ENSMUSG00000021952	Xpo4	4.26076	4.35058	4.17286	4.43359	3.33933	4.61946	4.20092	4.24676	4.32511	4.47715	4.64154	4.45228	3.97871	4.11175	4.00176	4.37041	4.63152	4.59808	4.19595	4.22389	4.06174	4.21857	4.07728	4.07288	4.18494	4.19278	4.1788	4.09216	4.05523	4.06965	4.12229	4.07743	4.04428	3.96359	4.31614	4.06102	4.06501	4.15076	3.97974	3.82921	3.71003	3.6811	3.74301	3.76009	3.12632	3.6984	3.70747	3.55471
ENSMUSG00000021958	Pinx1	5.419	5.73653	5.6467	6.20025	6.43777	6.21094	5.74026	5.95151	5.92376	6.17273	6.04772	6.09242	5.59755	5.68724	5.76066	5.95763	5.99881	6.07829	5.31125	5.09193	5.19513	5.17868	5.33693	5.02903	5.36886	5.20953	5.21068	5.34451	5.05913	5.31548	5.3069	5.19404	5.30408	5.35205	5.10432	5.16714	4.96029	4.88965	4.84995	5.28833	5.31301	5.28199	5.23767	5.32147	5.38768	5.17304	5.32361	5.24124
ENSMUSG00000022012	Enox1	2.37855	2.46018	2.43542	2.2138	2.23135	2.07783	2.09361	2.17961	2.10593	2.51856	2.43036	2.35407	2.32675	2.2165	2.28883	2.30484	2.53346	2.57958	2.96186	2.95563	3.04547	3.40256	3.27204	3.10792	2.77819	2.74177	2.87468	3.53181	3.22023	3.34976	2.97363	3.10815	3.03281	3.16778	3.00584	3.02619	3.17904	3.13175	2.99031	3.67203	3.65869	3.57658	3.39196	3.46771	3.30742	3.34769	3.54123	3.34807
ENSMUSG00000022022	Mtrf1	2.6832	2.91454	2.80653	3.19006	3.30594	3.49955	2.97718	3.03968	3.17472	3.15352	3.30639	3.18849	2.91229	2.89372	2.89183	3.56948	3.36437	3.37018	2.8464	2.74746	2.89411	3.04429	2.90393	2.77432	2.83918	2.9028	2.81188	2.87696	2.75332	2.93376	2.9547	2.94124	2.87594	2.97537	2.91975	2.87078	2.88213	2.80042	2.61119	2.59204	2.55872	2.513	2.90396	2.78891	2.87618	2.79663	2.82296	2.64537
ENSMUSG00000022139	Mbnl2	4.94071	4.98752	4.89956	4.94919	4.66867	4.92392	5.50569	5.65032	5.75285	4.60956	4.62618	4.62743	5.49482	5.48219	5.61684	4.36648	4.61897	4.64133	6.07138	6.04881	6.07872	5.32051	5.11059	4.98494	6.03851	6.05178	5.97298	5.04679	4.80197	4.82958	5.94543	5.85851	5.83826	5.04787	4.8985	4.80564	5.3992	5.37969	5.25763	6.19658	6.1196	6.18305	5.92386	5.85135	5.91986	6.04038	5.99877	6.1675
ENSMUSG00000022205	Sub1	8.70043	8.80729	8.77228	8.88445	9.42146	9.20147	8.7542	8.78251	9.07293	9.23334	9.28711	9.34699	8.59515	8.73825	8.58615	9.43829	9.23233	9.43028	8.55252	8.26695	8.46582	8.37856	8.56688	8.53622	8.54989	8.59139	8.66202	8.76962	8.67915	8.83561	8.57051	8.52965	8.59	8.62391	8.34857	8.67404	8.84434	8.72959	8.6693	8.09749	8.08547	8.01468	7.73915	8.03332	7.68992	8.10822	8.06528	8.10986
ENSMUSG00000022241	Tars	6.209	6.28167	6.16329	6.54073	6.58523	6.58043	6.37769	6.44362	6.41896	6.69565	6.9013	6.69321	6.23267	6.37211	6.24788	6.7215	6.72342	6.73838	6.2171	6.15654	6.13927	6.09055	6.09058	6.01949	6.23291	6.19417	6.20954	6.20528	6.07375	6.15496	6.27231	6.21037	6.27633	6.23172	6.14003	6.1185	6.07012	6.03554	5.94805	6.10121	6.19282	6.16902	5.97301	6.08194	5.94765	6.09653	6.24906	6.17744
ENSMUSG00000022247	Brix1	6.17223	6.66322	6.55011	6.94598	6.89483	7.07375	6.41226	6.65233	6.94711	6.88067	6.86023	6.88124	6.31452	6.35998	6.46823	6.74877	7.03459	7.3214	6.13473	6.0146	6.14208	5.96869	5.79743	5.86729	6.03887	5.92785	6.23018	6.05057	6.00642	5.89892	6.08104	6.06696	6.16763	5.96663	6.0219	6.00727	6.11157	5.9443	5.97723	5.96198	5.84206	5.84183	5.61313	5.58248	5.66156	5.84209	5.97116	5.7775
ENSMUSG00000022283	Pabpc1	9.23424	9.51449	9.32844	9.68483	9.27382	9.71484	9.20784	9.37607	9.36657	9.63974	9.8593	9.67221	9.20306	9.29082	9.28182	9.74031	9.6659	9.78806	8.88504	8.78877	8.8115	8.7222	8.71991	8.7339	8.83872	8.90271	8.92647	8.80576	8.76004	8.75693	8.80393	8.81508	8.81275	8.69677	8.69627	8.66821	8.75159	8.74647	8.70004	8.66096	8.80017	8.90065	8.43625	8.54771	8.55175	8.78254	8.9575	9.03317
ENSMUSG00000022313	Utp23	4.30269	4.18423	4.33723	4.45732	4.63928	4.45829	4.49201	4.5124	4.68017	4.50339	4.71994	4.62164	4.38641	4.51932	4.42606	4.51482	4.65927	4.749	4.58072	4.51741	4.60955	4.05176	4.22185	4.08205	4.51797	4.49903	4.62975	4.31394	4.20856	4.26209	4.59495	4.63806	4.71178	4.35	4.2608	4.29255	4.26844	4.15942	4.09143	4.18684	4.12855	4.16592	3.60516	3.8313	3.7618	4.17303	4.34387	4.04989
ENSMUSG00000022323	Hrsp12	5.22296	5.20819	5.35002	4.97376	5.67233	4.88914	5.30046	5.21104	5.3399	4.79079	4.93373	4.91169	5.23143	5.37628	5.25561	4.81901	4.96139	5.07711	5.12018	5.05237	5.04326	4.79255	4.75388	4.69462	5.18131	5.31511	5.4545	4.49344	4.57211	4.61187	5.2988	5.35809	5.30985	4.68506	4.69122	4.72071	5.29398	5.20168	5.27616	5.1777	5.22411	5.1376	4.48205	4.48658	4.55556	5.34034	5.30199	5.32201
ENSMUSG00000022325	Pop1	4.95087	4.80098	4.78983	4.96606	5.06807	5.13826	4.8231	4.76481	4.77117	5.0997	5.23898	5.03746	4.54741	4.58486	4.70636	5.36411	5.35611	5.35068	4.37813	4.20799	4.45988	4.54015	4.5441	4.48472	4.60147	4.53952	4.34001	4.65457	4.52845	4.71605	4.64323	4.48197	4.49713	4.96529	4.9258	4.72103	4.55027	4.52248	4.42283	4.09679	4.39239	4.46596	4.43871	4.55375	4.43343	4.57952	4.55785	4.36215
ENSMUSG00000022332	Khdrbs3	7.34503	7.43504	7.3385	5.43687	5.65759	5.52789	6.61325	6.65337	6.61549	5.21529	5.30615	5.04089	6.91461	7.11568	6.99694	5.39963	5.09419	5.14728	5.83393	5.75996	5.92458	5.32134	5.37175	5.19315	6.12563	6.15027	6.10698	5.43599	5.20035	5.19918	5.98428	6.03089	6.18684	5.43648	5.2997	5.37385	6.86871	6.88033	6.87576	5.12772	5.29651	5.26775	5.20971	5.23346	5.2625	5.78121	5.77331	5.70123
ENSMUSG00000022336	Eif3e	7.80801	8.11491	8.07625	8.53837	8.7903	8.81705	7.95107	8.171	8.39338	8.6093	8.75356	8.68857	8.05021	8.15536	8.12411	8.38236	8.65243	8.90668	8.15786	8.01324	8.09868	8.43417	8.41937	8.38941	8.31656	8.28561	8.49252	8.43861	8.38403	8.39007	8.28269	8.26116	8.33639	8.44831	8.25403	8.41148	8.10597	8.06695	7.94806	7.88405	7.83563	7.73925	8.02741	8.03307	7.93132	7.98642	8.10832	7.90368
ENSMUSG00000022370	Mrpl13	6.60352	6.6767	6.66457	7.16453	7.91037	7.30688	6.63166	6.61441	6.69145	7.15585	7.00683	7.07781	6.4823	6.57926	6.48691	7.33562	7.15102	7.31399	6.86021	6.64566	6.74438	7.02944	7.16312	7.06703	6.84552	6.81907	6.73902	6.96653	6.97626	7.03276	6.91587	6.87733	6.94811	7.10439	6.97952	7.11043	6.82538	6.71984	6.70595	6.52294	6.64393	6.55084	6.32588	6.52421	6.59942	6.52388	6.55244	6.56832
ENSMUSG00000022468	Endou	0	0	0	0.143452	0.096732	0.291692	0	0.0607526	0.0309282	0	0.159933	0.168451	0.0280091	0	0	0.0434064	0.138501	0.169107	0.103243	0.0824221	0.126942	0.269645	0.196758	0.266579	0.100448	0.125591	0.116649	0.235415	0.15951	0.141004	0.0661908	0.127893	0.0802582	0.211984	0.186547	0.252879	0.0295558	0.0273762	0.0412382	0.426401	0.425186	0.389116	0.208399	0.252548	0.270174	0.464757	0.648285	0.683158
ENSMUSG00000022672	Prkdc	2.34422	2.37727	2.10316	2.12171	1.45807	2.03339	2.53761	2.55211	2.55877	1.99593	2.09019	1.92961	2.47236	2.5998	2.37533	2.07325	2.04191	1.98416	2.58133	2.76426	2.55704	2.30736	2.23449	2.13745	2.72002	2.80388	2.67791	2.3182	2.08185	2.22997	2.63109	2.7313	2.64242	2.15285	2.49187	2.21249	2.32335	2.47998	2.38282	2.13348	2.24834	2.42454	2.10444	2.04609	2.3065	2.25273	2.14763	2.48047
ENSMUSG00000022748	Cmss1	4.79264	4.80161	4.87033	5.36134	5.40008	5.39968	3.80645	4.1835	4.03653	5.32818	5.43262	5.28087	3.77033	3.90123	3.65261	5.66185	5.33663	5.22824	4.10564	3.76634	3.78814	4.78461	4.87176	4.83836	4.02036	4.02449	4.06849	4.76557	4.73431	4.76717	3.89859	3.88323	3.95525	4.70845	4.53062	4.89068	4.75588	4.67197	4.5088	4.29898	4.34078	4.49512	4.52218	4.78004	4.78624	4.40359	4.60051	4.44308
ENSMUSG00000022792	Yars2	5.4275	5.28304	5.41478	5.21514	5.7395	5.51966	5.52639	5.44729	5.58815	5.44189	5.59833	5.52934	5.27427	5.16189	5.18486	5.52302	5.4218	5.60653	5.32035	5.31965	5.46622	5.02941	5.07908	4.9747	5.57879	5.6299	5.61905	5.30446	5.08715	5.2505	5.53946	5.53234	5.5398	5.22401	4.99786	5.28499	5.38112	5.40799	5.35733	5.06191	5.19656	5.02339	4.52633	4.83207	4.48809	5.31317	5.31733	5.25107
ENSMUSG00000022889	Mrpl39	5.80595	5.9273	5.97447	6.24408	6.27494	6.41752	5.88243	5.84012	5.87146	6.26946	6.23775	6.26403	5.7787	5.82444	5.79477	6.08223	6.34442	6.46397	5.30048	5.28017	5.32004	5.54548	5.5879	5.59752	5.34081	5.41285	5.27257	5.47761	5.45044	5.53097	5.29205	5.29285	5.36296	5.6728	5.52158	5.64158	5.4407	5.36197	5.30771	5.2938	5.43639	5.17971	5.48641	5.6916	5.46301	5.36508	5.48228	5.37256
ENSMUSG00000023025	Larp4	4.83585	5.04881	4.96408	4.99139	4.50348	5.06917	5.0536	5.23413	5.40701	5.11966	5.2839	5.1883	5.05188	5.12888	5.01421	5.13413	5.20261	5.36122	4.92732	4.8779	5.02337	4.45893	4.26153	4.24916	4.95219	4.91543	5.05932	4.75117	4.52136	4.66443	4.9444	4.86627	4.97156	4.56724	4.50958	4.49277	4.83175	4.79485	4.67571	4.8149	4.59885	4.65293	4.04934	4.02327	3.96486	4.74527	4.60584	4.6441
ENSMUSG00000023087	Ccrn4l	4.26885	4.33602	4.30353	3.80823	3.92115	3.88	4.30989	4.38128	4.4205	3.73831	3.80291	3.72155	4.10474	4.26745	4.1657	3.6518	3.65743	3.69284	4.54267	4.54397	4.68268	3.76609	3.71839	3.53227	4.30148	4.1738	3.96211	3.74807	3.54285	3.57318	4.29474	4.28041	4.31002	3.64266	3.49075	3.49099	4.20632	4.21573	4.12169	4.55948	4.51547	4.68301	3.69941	3.85105	3.90226	4.18315	4.15056	4.30631
ENSMUSG00000023106	Denr	7.18034	7.37791	7.26361	7.79833	8.32284	7.8207	7.18157	7.26288	7.54182	7.76939	7.80055	7.74981	7.23935	7.33959	7.29898	8.06994	7.72225	7.9134	6.90956	6.83371	6.89363	7.12136	7.03922	6.90986	6.89282	6.82909	6.74991	6.93797	6.84436	7.04285	7.00764	6.78788	7.04514	6.98799	7.00552	7.03715	6.75782	6.73093	6.7556	7.09412	6.99908	7.02834	7.09348	6.94793	7.21195	7.0258	7.11053	7.0146
ENSMUSG00000023495	Pcbp4	9.08023	8.88479	8.94423	8.47781	8.38608	8.3452	8.57167	8.29982	8.03888	8.2979	8.04349	8.0354	8.51065	8.39243	8.59588	8.24681	8.16145	8.03794	7.7672	7.66461	7.93143	7.9878	8.22462	7.94957	8.04263	8.12611	8.02044	7.94673	7.84923	8.01431	8.08471	8.15304	8.21399	8.04909	7.94104	8.07732	8.97933	8.97774	9.01938	7.62987	7.66563	7.56355	7.63584	7.79854	7.6353	7.73753	7.58005	7.81452
ENSMUSG00000023723	Mrps23	7.36655	7.12963	7.16128	7.22817	6.82197	7.3797	7.29114	6.89522	6.94684	7.15263	7.00996	6.97191	6.90305	6.916	6.94619	7.7987	7.1884	7.18851	6.48396	6.28671	6.49709	6.45789	6.79468	6.56792	6.38418	6.46225	6.24395	6.51116	6.39313	6.5103	6.70293	6.52006	6.67061	6.63172	6.33322	6.44026	6.78745	6.51058	6.46606	6.89311	6.87708	6.66552	6.67573	6.66981	6.84378	6.87191	6.98925	6.83849
ENSMUSG00000023952	Gtpbp2	5.6787	5.35061	5.4534	5.03492	4.6928	4.95993	5.74135	5.43877	5.3958	5.03293	5.16627	5.16559	5.65062	5.63408	5.72805	5.39786	5.14899	5.05237	5.71064	5.73504	5.76026	5.84196	5.80542	5.58954	5.70401	5.74984	5.67416	5.67612	5.5274	5.68655	5.77273	5.85509	5.72897	5.96072	5.73826	5.66925	5.68816	5.57405	5.467	6.04112	5.92748	6.00958	5.87755	5.88037	5.94513	6.12013	5.78911	5.9802
ENSMUSG00000023988	Bysl	5.0068	5.03795	4.94473	5.09326	5.21378	5.09024	4.84801	4.851	4.66011	5.06775	5.06423	4.96377	4.6223	4.7309	4.62845	5.19885	5.09799	5.04574	4.52326	4.47274	4.57038	4.60882	4.72514	4.67054	4.54479	4.48583	4.36743	4.72704	4.61962	4.71137	4.56179	4.52169	4.5858	4.62377	4.53956	4.61812	4.69236	4.74794	4.69167	4.38451	4.49684	4.55621	4.27601	4.42604	4.43053	4.34852	4.34843	4.37603
ENSMUSG00000024079	Eif2ak2	2.91889	3.03975	2.89898	3.47647	3.00413	3.41927	3.02832	3.12281	3.10929	3.46903	3.57145	3.47627	3.2313	3.3013	3.14844	3.24515	3.55143	3.5383	3.64307	3.50162	3.42644	4.00264	3.62605	3.66524	3.38568	3.21814	3.42725	3.72343	3.41392	3.62079	3.36841	3.31704	3.36846	3.65182	3.70866	3.49954	3.06726	2.9492	2.86326	3.62006	3.45673	3.40386	3.97661	4.0148	3.77366	3.45231	3.42629	3.31953
ENSMUSG00000024217	Snrpc	7.09242	7.07049	7.00411	7.27228	7.146	7.27341	7.18784	6.8926	6.64238	7.35544	7.3088	7.08535	6.69351	6.65064	6.98274	7.16494	7.21054	7.40961	6.60504	6.57389	6.74286	6.95654	7.18302	6.9168	6.64917	6.85655	6.63824	7.00777	6.88653	6.90539	6.68615	6.74573	6.8252	7.1831	6.97208	7.11171	6.8654	6.84702	6.76101	6.23203	6.55847	6.40399	6.35845	6.67315	6.47546	6.28099	6.39544	6.552
ENSMUSG00000024268	Celf4	2.04755	2.03899	2.16403	1.2731	1.68114	1.37002	1.76432	1.75313	1.79827	1.24475	1.0984	1.25501	1.99944	1.85747	1.83812	1.24166	1.35972	1.33463	2.31381	2.33447	2.4043	1.60425	1.5101	1.3643	2.32455	2.30302	2.28309	1.5966	1.37314	1.37255	2.34981	2.19631	2.23221	1.69718	1.41532	1.42341	2.47885	2.61933	2.49486	2.34219	2.43576	2.47033	2.0269	2.17029	2.1761	2.2561	2.32405	2.47831
ENSMUSG00000024287	Thoc1	4.92281	5.09171	4.9914	5.40829	5.89814	5.60905	4.95904	5.16427	5.39559	5.44072	5.69169	5.57879	4.96227	5.03422	4.97395	5.59291	5.58716	5.757	4.8226	4.77699	4.85792	5.08276	5.02051	4.97884	4.92683	4.87041	5.08847	5.09812	4.86543	5.0706	4.90857	4.95195	5.02736	5.1519	4.955	5.07614	4.96172	4.86394	4.77307	4.62325	4.56421	4.56232	4.7283	4.65905	4.77861	4.80834	4.76617	4.69297
ENSMUSG00000024360	Etf1	7.12381	7.22751	7.16931	7.49364	7.50898	7.58923	7.18405	7.28753	7.4466	7.41773	7.59494	7.45259	7.04927	7.13054	6.95541	7.53911	7.55814	7.62709	7.05482	6.94854	7.10558	6.98033	6.92992	6.92778	7.04689	7.01212	7.15088	7.01459	6.89259	6.97471	7.01001	6.97963	7.12731	6.9174	6.94158	6.97838	6.99249	6.98403	6.97773	7.05362	6.88445	6.90391	6.59396	6.64445	6.51468	7.02652	6.91645	6.80629
ENSMUSG00000024436	Mrps18b	4.55678	4.97608	4.65693	5.18709	4.96624	5.35172	4.868	4.9557	4.89631	4.97463	5.33507	5.06604	4.30052	4.57603	4.47178	5.35565	5.25124	5.62393	4.6618	4.63023	4.61275	4.36358	4.45522	4.63404	4.63235	4.3465	4.90584	4.67634	4.3614	4.56419	4.55709	4.17742	4.7759	4.31409	4.20362	4.67751	4.98481	4.54229	4.66995	4.38483	4.27741	4.74742	3.80325	3.93915	4.03488	4.30464	4.5803	4.27303
ENSMUSG00000024472	Dcp2	5.10924	5.19318	5.18732	5.76158	5.15333	5.79592	5.25145	5.32879	5.44916	5.68159	5.82939	5.74072	5.3574	5.40926	5.30606	5.86653	5.90314	5.88334	5.48313	5.53018	5.46868	5.84062	5.7589	5.61448	5.43255	5.52501	5.39164	5.75123	5.60669	5.70737	5.57718	5.54896	5.49043	5.76158	6.0292	5.78807	5.0874	5.18316	5.01209	4.73683	4.66267	4.63065	4.87987	4.8955	4.63575	4.66974	4.55418	4.55402
ENSMUSG00000024528	Srfbp1	5.08022	5.31568	5.32706	5.75147	5.72312	5.81528	5.26229	5.50361	5.39153	5.67968	5.78906	5.74121	5.37016	5.44979	5.47703	5.80419	5.8597	6.03884	4.87609	4.74765	4.95701	5.05362	5.05603	4.82472	5.05225	5.02371	5.08761	5.15539	4.94191	5.16952	4.95991	4.88209	5.03543	5.14898	4.98723	5.09767	5.0069	4.84537	4.74851	5.10748	5.04564	5.01283	5.1337	5.09472	5.15457	5.11418	5.04982	5.02529
ENSMUSG00000024608	Rps14	10.7829	10.8232	10.7888	10.8952	10.8916	11.0036	11.159	10.9853	10.7051	11.2721	11.194	10.8314	10.7839	10.8378	10.7655	11.0643	10.8322	11.2128	11.2361	11.1148	11.3478	10.9185	11.429	11.1826	11.5253	11.3238	11.4974	11.1724	11.1021	11.4125	11.4722	11.3708	11.5502	11.1745	11.0216	11.6609	11.3931	11.2511	11.2293	10.5382	10.6053	10.4834	10.0716	10.2092	10.1583	10.9231	10.7931	10.6027
ENSMUSG00000024732	Ccdc86	5.05274	5.02161	4.94862	5.15733	5.31004	5.03334	5.12393	5.03666	4.88899	5.11051	5.16959	4.9816	4.82352	4.91335	4.83562	5.21709	5.09579	5.08726	4.91491	4.81804	5.14986	4.55556	4.62821	4.585	4.91945	4.89985	4.90818	4.71667	4.60862	4.74992	4.91479	4.95598	5.05366	4.57365	4.51528	4.60887	4.85338	4.80335	4.83673	4.76009	4.76061	4.77697	4.02102	4.25708	4.11606	4.72134	4.70271	4.68905
ENSMUSG00000024785	Rcl1	5.49004	5.56192	5.49416	6.05484	6.13028	6.12656	5.50747	5.44061	5.47756	5.91168	5.88726	5.8308	5.2058	5.36545	5.26822	5.96085	6.00997	5.97812	5.57031	5.46339	5.71613	6.0763	6.2162	5.88728	5.63046	5.64535	5.52508	5.58332	5.47974	5.58097	5.64917	5.62638	5.62299	5.37725	5.39897	5.41995	5.51869	5.45169	5.50486	5.37472	5.51228	5.34694	5.44326	5.51883	5.49973	5.38975	5.35315	5.29932
ENSMUSG00000024800	Rpp30	5.15045	5.2097	5.32722	5.50795	5.97585	5.72199	5.29024	5.28521	5.54256	5.61656	5.6204	5.89571	5.09783	5.22658	5.04392	5.94606	5.70519	5.93747	5.0023	4.82303	5.06991	5.08352	5.23568	5.02865	5.06599	5.13724	5.16824	5.12819	5.00025	5.17792	5.05233	5.08653	5.21862	5.21411	4.9928	5.27414	5.11623	5.02425	4.99378	4.97585	5.05604	4.93077	4.63828	4.86058	4.71436	5.039	5.11039	5.08574
ENSMUSG00000024925	Rnaseh2c	6.35835	6.14977	6.23423	6.03377	6.99785	6.33752	6.40059	5.69878	5.78411	6.24628	5.9418	6.25421	6.14911	6.08006	5.88495	6.95059	6.10487	6.09137	5.95754	5.71328	5.96619	6.47882	6.80047	6.40901	6.13489	6.15294	6.03714	6.87274	6.59903	6.8937	6.10819	6.22422	5.96123	6.91853	6.51704	6.94913	6.66004	6.6793	6.56344	5.591	5.97863	5.76259	5.72133	6.07912	5.83815	6.03978	5.86379	6.09329
ENSMUSG00000024975	Pdcd4	5.89553	5.75933	5.719	5.04852	5.14982	5.06751	5.9782	5.95172	6.06327	5.39302	5.66515	5.49848	6.26676	6.39334	6.31981	5.48902	5.49601	5.4711	6.85595	6.77237	6.74222	6.24584	6.14572	5.85735	6.63008	6.66809	6.67608	6.34473	6.17173	6.23363	6.68485	6.62537	6.7734	5.98656	5.86451	5.7559	6.29976	6.2656	6.1816	6.4266	6.44991	6.49307	6.28602	6.37028	6.31713	6.2812	6.44404	6.28911
ENSMUSG00000025056	Nr0b1	1.16045	1.25825	1.237	0.0229779	0.0457406	0.0913351	0.683342	0.567622	0.473419	0.285422	0.115013	0.140251	1.15613	0.894858	1.00851	0	0.206976	0.171975	0.0213113	0.0235414	0.136179	0.0425971	0.0222064	0.0613221	0	0.0234268	0	0.141927	0.106835	0.212725	0.0752903	0.0464514	0.0687158	0.022515	0	0.0871698	0.688695	0.527375	0.679052	0	0.0615159	0.019253	0.0760465	0.0825003	0.115729	0.0223785	0.0210018	0.0478523
ENSMUSG00000025081	Tdrd1	0.680451	0.666855	0.633362	0.562584	0.455179	0.42461	1.75737	1.72306	1.64292	0.728829	0.648756	0.637577	1.33535	1.36327	1.23799	0.460226	0.692864	0.628366	2.40933	2.59673	2.32469	0.978335	0.765784	0.757168	2.98524	2.67542	2.46487	1.38459	1.05835	1.11235	2.61859	2.56624	2.24489	0.796636	0.692702	0.608306	0.910671	0.916006	0.909056	2.50428	2.51881	2.61118	0.717871	0.770961	0.910978	2.73754	2.94107	2.99298
ENSMUSG00000025134	Alyref	7.69501	7.75385	7.79373	8.07545	8.32506	8.07389	7.63142	7.61187	7.62354	8.07162	7.89208	8.0125	7.62379	7.58967	7.60405	8.39323	8.11678	8.01668	7.17311	7.04169	7.18616	7.53822	7.79836	7.72579	7.32135	7.39437	7.2253	7.77218	7.71907	7.8846	7.26586	7.23432	7.18527	7.75711	7.61119	7.8428	7.60147	7.6251	7.60536	7.09427	7.29671	7.03929	7.36809	7.38764	7.26776	7.24953	7.17103	7.23363
ENSMUSG00000025262	Fam120c	2.04146	2.12298	1.99546	1.40937	0.722539	1.32482	1.95137	1.9881	2.13345	1.57168	1.49121	1.62176	2.07962	1.97176	1.94953	1.29342	1.38827	1.36856	2.034	2.13857	2.00406	1.58894	1.5766	1.47339	2.06378	2.15386	2.02343	1.91044	1.71573	1.6934	2.10939	2.01185	2.0455	1.52047	1.74453	1.39248	2.22546	2.19813	1.98575	1.92727	2.0353	1.95531	1.98539	1.97116	1.70197	2.01122	2.00507	2.06173
ENSMUSG00000025290	Rps24	11.3402	11.6654	11.5011	11.8926	12.5106	12.1506	11.5238	11.7911	11.8949	12.0016	12.125	11.9418	11.5886	11.748	11.7079	11.9623	11.9965	12.387	11.3474	11.0629	11.2709	11.2307	11.328	11.0382	11.5459	11.4779	11.6417	11.2141	11.1364	11.1858	11.4703	11.4257	11.6629	11.2522	10.9366	11.2143	11.2706	11.179	11.0544	11.545	11.6094	11.3901	11.2791	11.145	11.3759	11.6262	11.7501	11.6171
ENSMUSG00000025364	Pa2g4	7.96684	8.13942	8.10731	8.5555	8.6919	8.56347	7.90186	7.9782	7.99546	8.45069	8.48434	8.3827	7.81745	7.87173	7.90548	8.45042	8.48238	8.5827	7.65968	7.63988	7.67861	7.59985	7.70115	7.62434	7.72278	7.63419	7.65634	7.70896	7.69574	7.71729	7.75897	7.70729	7.7939	7.65324	7.66538	7.74717	7.75267	7.70306	7.69162	7.71354	7.70551	7.7202	7.38255	7.33022	7.3622	7.74363	7.70077	7.68008
ENSMUSG00000025395	Prim1	6.42328	6.46455	6.39516	6.76074	7.0387	6.94883	6.15986	6.18964	6.36691	6.72337	6.85215	6.80329	6.0814	6.15139	6.12088	6.63731	6.79059	6.96153	6.02737	5.96375	6.03361	6.6408	6.64862	6.50647	6.11009	6.11508	6.12039	6.61212	6.49929	6.60302	6.07506	6.04052	6.14939	6.77697	6.62224	6.69633	6.63465	6.62088	6.48366	5.76499	5.72238	5.70768	6.09944	6.10914	6.12929	6.02146	5.99219	5.89956
ENSMUSG00000025508	Rplp2	9.46419	9.40311	9.40771	9.387	10.0773	9.41638	9.67653	9.45957	9.22481	9.56379	9.6706	9.47065	9.28562	9.48167	9.30947	9.98928	9.48048	9.64408	9.76022	9.44863	9.78072	9.54237	9.77886	9.4558	10.0163	9.97945	10.2308	9.74463	9.56841	9.67232	9.95497	9.95112	10.0322	9.76642	9.31236	9.63341	9.85306	9.8054	9.74819	9.28995	9.55696	9.49964	8.60623	8.92902	8.79822	9.55924	9.461	9.53306
ENSMUSG00000025576	Rbfox3	0.949876	0.855267	0.899499	0.342286	0.456487	0.329482	0.763003	0.247825	0.220472	0.526538	0.465265	0.568578	0.185768	0.475864	0.283509	0.576946	0.748835	0.891207	0.298889	0.20106	0.301982	0.509195	0.550432	0.539865	0.214751	0.240433	0.227232	0.997774	1.03462	1.03266	0.279925	0.33674	0.255321	1.37317	1.39865	1.54003	1.12281	1.12342	1.13391	0.132704	0.121967	0.256317	0.983095	0.826393	0.791107	0.115712	0.230089	0.153905
ENSMUSG00000025586	Cpeb1	0.549372	0.424494	0.982565	0.514351	0	0.286748	0.585032	0.279984	0.340847	0	0.215435	0.0496772	0.149984	0.339705	0.275716	0.150189	0.111539	0	0.0479182	0	0.0261901	0.412888	0.211167	0.075764	0.369436	0.215665	0.119389	0.230654	0.0656874	0.102648	0.0425613	0.22372	0.0735241	0.0882356	0.212635	0.149988	3.27153	2.93206	2.65755	0.485266	0.378256	0.127877	0.265721	0.717925	0.317533	0.0124612	0	0.0921591
ENSMUSG00000025762	Larp1b	2.90674	3.06541	2.98687	2.39401	2.38569	2.52785	2.22246	2.10909	2.30181	1.75192	1.70032	1.65766	2.07325	2.09043	2.13256	1.29529	2.19152	2.46433	1.91474	1.77915	2.06912	1.77517	1.80553	1.56964	1.70415	1.6929	1.64029	1.38133	1.35324	1.5584	1.81685	1.96099	1.91547	1.4627	1.46771	1.42404	2.98062	2.97653	2.89196	2.43622	2.11443	2.11706	1.71183	1.49995	1.58207	1.99735	2.1671	1.85712
ENSMUSG00000025785	Exosc7	6.36605	6.35652	6.41088	6.00078	6.16015	6.08066	6.65117	6.53002	6.4815	6.15622	6.06546	6.03513	6.27636	6.38136	6.21955	6.22665	5.89832	5.96684	6.13242	6.09971	6.22019	5.47021	5.56775	5.3876	6.44101	6.28536	6.25568	5.63372	5.60017	5.69651	6.39355	6.32174	6.31416	5.56793	5.59172	5.46957	6.3504	6.30291	6.22817	6.02641	5.88071	5.97006	5.08046	4.95993	5.02313	6.3355	6.05357	6.06876
ENSMUSG00000025794	Rpl14	8.49714	8.61721	8.69259	8.70807	9.65881	8.74989	8.7735	8.63196	8.51716	8.75723	8.2771	8.58382	8.65306	8.59681	8.60195	8.88496	8.6637	8.58054	8.8403	8.47557	8.76333	8.62515	8.85792	8.60905	9.03577	9.03812	8.86504	8.78954	8.74832	8.86427	8.93496	8.86688	8.7727	8.80077	8.50046	8.6569	8.93532	8.83949	8.81043	8.52133	8.69399	8.51321	7.90256	8.03954	8.29695	8.53006	8.72925	8.93624
ENSMUSG00000025880	Smad7	4.25726	3.9903	4.09345	3.91954	3.64333	4.10701	4.48384	4.40036	4.28277	3.77399	3.66034	3.75782	4.06436	4.1771	4.19236	4.09142	3.78075	3.78031	5.36929	5.29076	6.17447	5.10272	5.09598	4.98109	4.11699	4.25377	4.63385	4.2545	4.08044	4.2966	4.44952	4.58598	5.14826	4.93761	4.7278	4.84212	4.25816	4.13933	4.11099	5.45469	4.88377	5.43652	5.11032	4.91422	5.08946	4.20705	3.86009	3.79528
ENSMUSG00000026019	Wdr12	4.87988	4.90537	4.87459	5.17345	5.32562	5.3591	4.87936	4.80419	5.08901	5.17273	5.18909	5.38297	4.60586	4.78058	4.61174	5.39677	5.47902	5.42724	4.71826	4.62904	4.79049	4.72184	4.72442	4.66966	4.9653	4.87375	4.93415	4.64671	4.67029	4.70139	4.79082	4.98437	4.8006	4.65822	4.61057	4.59269	4.76672	4.67538	4.62243	4.58175	4.43427	4.41358	4.05451	4.21804	4.02609	4.64933	4.61603	4.52866
ENSMUSG00000026020	Nop58	8.85548	8.88392	8.83097	9.08675	9.4288	9.25918	8.84022	8.89554	9.21141	9.0365	9.30144	9.25702	8.75696	8.98544	8.77942	9.48512	9.36929	9.52662	8.4813	8.46304	8.49858	8.31706	8.16023	8.11855	8.60125	8.37479	8.70665	8.37011	8.14562	8.44592	8.53018	8.48081	8.64018	8.32062	8.20214	8.31296	8.44647	8.41587	8.33701	8.76697	8.66205	8.6695	8.42953	8.32792	8.4357	8.93524	8.89845	8.75143
ENSMUSG00000026034	Clk1	6.24799	6.28351	6.23219	6.30947	6.32722	6.34664	6.37883	6.41274	6.67095	6.14118	6.28788	6.45398	6.63407	6.68586	6.68242	6.11682	6.27895	6.42654	7.02817	6.55992	6.72748	6.8104	6.31774	6.40775	7.07699	6.61226	7.00825	6.58023	6.26163	6.52432	7.05014	6.67586	6.9267	6.95202	6.34904	6.43211	6.39672	5.85728	6.03198	7.51602	7.39564	7.59717	6.95413	7.18493	7.22682	7.39793	7.48535	7.40003
ENSMUSG00000026035	Ppil3	5.63724	5.74089	5.75508	6.12336	6.65134	6.22963	5.66175	5.65556	5.84255	6.07471	5.93026	6.07362	5.71357	5.6566	5.73531	6.17862	6.23027	6.3937	5.54308	5.47606	5.51037	5.69285	5.78117	5.75248	5.68969	5.5526	5.70869	5.70991	5.69449	5.84498	5.7872	5.79958	5.78356	5.91867	5.7845	6.04224	5.65946	5.5427	5.54532	5.41412	5.47275	5.36057	5.55146	5.51524	5.58015	5.56854	5.68319	5.43301
ENSMUSG00000026058	Khdrbs2	0.778798	0.863776	0.89656	1.21798	1.56276	1.14514	0.207196	0.285255	0.257451	2.15105	2.40522	2.40016	0.285377	0.360915	0.393478	0.59017	2.30442	1.08199	1.60402	1.58368	1.22345	2.98719	2.4068	2.57567	0.696623	0.80003	0.468427	3.05376	3.04984	3.19001	0.653632	0.916438	0.792798	2.03611	1.98546	2.16664	2.18625	2.00453	1.985	1.97353	1.75531	1.97843	3.0833	2.74621	2.66731	0.663568	1.06432	0.664359
ENSMUSG00000026127	Imp4	5.75062	5.56618	5.47598	5.71727	5.22179	5.69313	5.81613	5.60891	5.46388	5.84705	5.70894	5.71461	5.32512	5.44535	5.49613	6.08301	5.7551	5.70384	5.6163	5.51771	5.66019	5.33148	5.34571	5.06308	5.7467	5.6493	5.62736	5.58215	5.30713	5.55027	5.66155	5.59553	5.76927	5.35669	5.23117	5.37775	5.58681	5.61469	5.50079	5.33183	5.39081	5.37144	4.92765	5.0087	4.713	5.33385	5.3554	5.29608
ENSMUSG00000026234	Ncl	9.69138	9.81491	9.7366	10.13	10.3242	10.1327	9.51399	9.67917	9.82977	10.0307	10.2692	10.1369	9.51909	9.63752	9.48431	10.3159	10.2024	10.2479	9.2069	9.20166	9.15984	9.15181	9.06912	9.07101	9.22959	9.12165	9.23599	9.15331	9.13412	9.20243	9.23252	9.17996	9.28249	9.01784	9.15263	9.05629	9.22685	9.22343	9.19368	9.31771	9.25665	9.27055	9.09741	8.95521	8.98943	9.39675	9.39193	9.22352
ENSMUSG00000026245	Farsb	6.06819	6.24446	6.19549	6.68321	6.85871	6.79527	6.09383	6.05714	6.12447	6.35258	6.26956	6.3625	5.86561	5.87842	5.87209	6.31798	6.42199	6.52856	6.11561	5.96087	6.00023	6.45386	6.42498	6.43522	6.11236	6.07123	6.05079	6.21512	6.08905	6.17867	6.12467	6.02789	6.03589	6.21852	6.13061	6.16257	6.27126	6.17568	6.13538	5.83856	5.92031	5.94513	5.93711	5.98517	5.98014	5.85301	6.00823	5.97326
ENSMUSG00000026248	Mrpl44	5.85682	5.82301	5.87623	5.62753	5.98488	5.65446	5.92729	5.89709	5.94393	5.51609	5.58247	5.59889	5.89411	5.82769	5.73928	5.47407	5.49578	5.5347	5.76699	5.72997	5.78831	5.25194	5.32552	5.09928	5.84099	5.86485	5.80933	5.26079	5.16152	5.38772	5.85559	5.87699	5.8883	5.28012	5.15587	5.23935	5.91188	5.89604	5.86629	5.53502	5.61509	5.62248	4.76174	4.92837	4.91893	5.72179	5.74501	5.73828
ENSMUSG00000026305	Lrrfip1	4.851	4.86806	4.84838	5.02408	4.77481	4.96656	5.19424	5.33008	5.26134	4.33682	4.44498	4.35229	5.08465	5.14056	5.03933	4.48746	4.56979	4.62168	5.28802	5.25195	5.39562	4.39817	4.35313	4.19043	5.16256	5.13537	5.17978	4.22843	3.97029	4.10189	4.88917	4.85085	4.88701	4.04519	3.99575	3.90234	4.92429	4.79392	4.75508	5.21917	5.0796	5.04404	4.4478	4.46379	4.37822	5.09755	5.09598	5.03297
ENSMUSG00000026377	Nifk	6.84999	6.96651	6.94597	7.22418	7.6062	7.40315	6.81602	6.93181	7.09828	7.11314	7.32816	7.19222	6.73755	6.84628	6.75079	7.53443	7.3652	7.50269	6.5747	6.45506	6.55808	6.40195	6.42287	6.25965	6.7107	6.52864	6.75259	6.45432	6.20313	6.48708	6.62117	6.57526	6.76874	6.40772	6.27591	6.43722	6.60122	6.56174	6.48158	6.72314	6.55738	6.43636	6.38953	6.35324	6.28338	6.75548	6.83978	6.48984
ENSMUSG00000026511	Srp9	6.44772	6.45551	6.48273	6.84178	7.46159	7.04672	6.20975	6.34953	6.48741	6.70379	6.84897	6.72558	6.24106	6.30541	6.21749	6.85306	6.79328	6.85179	6.12972	6.02122	6.15345	6.61649	6.65139	6.4342	6.18522	6.2834	6.27804	6.65844	6.49902	6.66245	6.29726	6.25295	6.33847	6.69566	6.49395	6.62726	6.40478	6.41527	6.34968	6.14252	6.24504	6.11379	6.22669	6.44814	6.25409	6.23574	6.29453	6.15041
ENSMUSG00000026667	Uhmk1	4.73676	4.82287	4.84668	4.59498	4.1639	4.64154	4.88877	5.00418	5.07682	4.47861	4.48158	4.4799	4.77014	4.7666	4.768	4.47959	4.57931	4.62491	5.11097	5.17005	5.03546	4.34709	4.27332	4.09842	5.00402	5.01285	5.00495	4.34056	4.28851	4.23639	4.99331	4.96121	4.89487	4.11912	4.40164	4.10581	5.12771	5.14401	5.07393	4.63521	4.52241	4.41195	3.78847	3.68207	3.60223	4.47338	4.4755	4.39569
ENSMUSG00000026709	Dars2	5.85118	5.73713	5.7215	5.69797	5.89192	5.91935	5.78141	5.45474	5.5747	6.00474	5.97561	5.85771	5.38321	5.59013	5.2712	5.82013	5.80074	5.99493	5.19106	5.20652	5.10918	5.01117	5.18453	5.07696	5.29436	5.32467	5.29666	5.21677	5.10869	5.22725	5.26648	5.22936	5.43281	5.14867	5.13186	5.37307	5.5629	5.52519	5.46729	4.7002	4.87135	4.80936	4.39793	4.30697	4.39907	5.07172	4.93139	4.79311
ENSMUSG00000026889	Rbm18	5.44338	5.58146	5.58695	5.72323	5.74377	5.8113	5.30331	5.31031	5.48597	5.93795	5.89263	5.95992	5.32441	5.38526	5.42959	6.09602	6.3955	6.4288	5.67458	5.57466	5.58871	5.94401	5.83301	5.76505	5.6478	5.5105	5.62046	6.11128	5.95033	5.98063	5.62084	5.61646	5.58261	6.38768	6.32617	6.23268	5.94888	5.87527	5.77566	5.43038	5.36426	5.42689	5.66545	5.69693	5.75171	5.30431	5.3937	5.28573
ENSMUSG00000026896	Ifih1	0.503859	0.586878	0.609626	0.362863	0.257293	0.336293	0.489092	0.389009	0.39038	0.346972	0.261324	0.245932	0.849489	0.799658	0.779906	0.262256	0.218067	0.393552	1.27932	1.2275	1.22787	0.550434	0.565839	0.331018	0.982565	0.93362	0.950389	0.481476	0.300545	0.417879	1.11839	1.16391	1.04189	0.457297	0.549177	0.363971	0.797656	0.848269	0.87816	1.10598	0.939415	1.15476	0.477209	0.542618	0.551254	1.09975	1.17956	1.1575
ENSMUSG00000026915	Strbp	6.58471	6.83971	6.78985	6.26227	5.85886	6.32312	6.00716	6.26635	6.59277	6.19542	6.32831	6.33209	6.19703	6.37617	6.28966	6.12354	6.25591	6.51479	5.71801	5.84385	5.70889	5.44674	5.40774	5.43573	5.69822	5.68753	5.88499	5.31114	5.40013	5.39843	5.67072	5.83338	5.76099	5.50614	5.44051	5.53695	6.51986	6.53171	6.36567	5.47001	5.37884	5.39943	5.35	5.11302	4.86113	5.58867	5.72247	5.40163
ENSMUSG00000026970	Rbms1	6.07801	6.33522	6.19486	6.16923	5.58817	6.0794	6.83254	6.94335	6.77577	6.38426	6.37126	6.21102	6.82296	6.69204	6.92964	5.83912	6.10432	6.13687	6.98872	7.00386	7.05991	6.08347	6.01486	5.91447	6.67842	6.87386	6.70317	6.22976	6.21291	6.11952	6.78395	6.81564	6.79966	5.88893	5.939	5.8016	6.15518	6.1889	6.12508	6.70353	6.71243	6.72258	6.47593	6.23756	6.29687	6.41226	6.39443	6.55014
ENSMUSG00000026987	Baz2b	5.93833	6.0023	5.85172	5.21102	4.29199	5.17446	5.71808	5.74792	5.742	5.22787	5.46186	5.31897	5.83655	5.84987	5.87043	5.28751	5.21063	5.35744	5.76728	5.91306	5.79518	5.19056	5.119	4.99923	5.70293	5.75684	5.65185	5.15861	4.93802	5.01643	5.6891	5.76093	5.66549	5.08564	5.15594	4.96765	6.07647	6.03899	5.93365	5.552	5.77124	5.68746	5.2631	5.17878	5.10937	5.3818	5.38867	5.55382
ENSMUSG00000027079	Clp1	5.03931	5.09268	5.08436	5.10153	5.62107	5.20594	5.04602	4.96074	5.07571	5.14644	5.19037	5.2148	4.92607	4.84295	4.8835	5.15672	5.19761	5.37887	5.12668	5.04446	5.1168	5.12602	5.22469	5.18442	5.145	5.024	5.15074	5.31535	5.19327	5.23691	5.21075	5.15967	5.22136	5.24587	5.25037	5.32679	5.26191	5.23477	5.1674	4.47508	4.48094	4.49026	4.30641	4.31007	4.31604	4.65418	4.58073	4.44099
ENSMUSG00000027133	Nop10	7.00527	7.05465	7.17947	7.27361	7.75094	7.41507	7.15084	7.16631	7.24481	7.27287	6.99591	7.329	7.12332	7.03863	7.16179	7.10153	7.55425	7.5876	6.75295	6.57791	6.74794	6.38095	6.59495	6.37664	6.85727	6.7129	6.78698	6.6484	6.50619	6.70353	6.94625	6.88246	6.94037	6.62126	6.41584	6.63136	6.82826	6.79499	6.75336	7.0445	7.02025	7.11475	6.49324	6.60177	6.67404	7.04644	7.13713	7.10107
ENSMUSG00000027170	Eif3m	7.15731	7.14372	7.03453	7.38298	7.49931	7.53328	7.20727	7.16924	7.30054	7.43847	7.61714	7.461	6.9553	7.09891	6.90083	7.54517	7.44929	7.71526	7.2648	7.19779	7.25344	7.17348	7.15573	7.14852	7.28701	7.14125	7.47475	7.22725	7.18322	7.20288	7.31264	7.35695	7.45525	7.29804	7.10358	7.31285	7.289	7.21602	7.10375	6.73985	6.64625	6.6549	6.45476	6.42506	6.38231	6.87751	6.90711	6.64139
ENSMUSG00000027324	Rpusd2	3.91279	3.98028	3.9491	3.97679	3.44197	3.74354	3.99494	3.87035	3.78862	3.72231	3.74666	3.71302	3.78337	3.8472	3.76392	4.04234	4.00257	3.94553	3.50928	3.55321	3.71616	3.10104	3.12313	3.04015	3.63734	3.62724	3.54057	3.09584	3.0604	3.22654	3.52713	3.49973	3.52315	3.11235	3.27101	3.2089	3.5918	3.54877	3.43683	3.30565	3.26434	3.1781	2.71058	2.79112	2.53562	3.1013	3.11701	3.0959
ENSMUSG00000027422	Rrbp1	7.00199	7.26947	7.02091	6.63025	7.37137	6.52956	6.84206	6.8794	6.69691	6.912	6.83748	6.60694	6.80581	6.95641	6.83308	6.52103	6.61131	6.6331	6.39303	6.41606	6.43224	6.71695	6.67658	6.46315	6.27167	6.46246	6.42305	7.0136	6.75706	6.66389	6.39063	6.43562	6.40922	6.73758	6.76263	6.68372	6.68306	6.79863	6.89834	6.54175	6.78715	6.81976	7.16183	7.29962	7.80009	6.46671	6.40698	6.68464
ENSMUSG00000027478	Dnmt3b	5.61572	5.70998	5.59914	4.54392	4.27146	4.54124	5.08494	5.02809	4.88693	4.30116	4.38675	4.21072	4.95286	5.0818	4.99197	4.7051	4.7421	4.62271	3.95667	4.00303	4.16432	3.94205	3.96423	3.85694	3.78279	3.77254	3.84068	3.60342	3.59756	3.67777	3.88849	3.93923	4.11557	3.52376	3.7728	3.6646	4.85022	4.94716	4.92754	3.59024	3.55048	3.49969	3.33422	3.35203	3.31849	3.21401	3.28562	3.40672
ENSMUSG00000027487	Cdk5rap1	3.65319	3.49604	3.51714	3.03459	3.53467	3.2038	3.54589	3.48017	3.46668	3.27442	3.46087	3.2968	3.28091	3.43674	3.26433	3.01041	3.31435	3.22612	3.79173	3.87494	3.71509	3.33137	3.37102	3.23883	3.62212	3.63931	3.59841	3.46167	3.37915	3.44492	3.7321	3.65496	3.75304	3.46155	3.64521	3.54701	3.93859	3.88155	3.90226	3.77127	3.83496	3.98502	3.12272	3.17888	3.21772	3.68226	3.63796	3.6463
ENSMUSG00000027510	Rbm38	7.04467	7.01222	7.00419	7.09592	6.35903	6.91734	7.0052	6.99533	6.58682	6.86301	7.00458	6.76122	6.8005	6.77742	7.19092	6.39151	6.76014	6.86993	5.90535	5.58814	5.74209	5.1936	5.28767	5.24452	5.90977	5.7266	5.54079	5.6032	5.63577	5.60676	5.88851	5.91344	5.78579	5.38028	5.32194	5.40835	5.82917	5.85	5.90171	5.9495	5.92781	6.04636	5.47903	5.27932	5.25704	5.99299	6.03814	5.95584
ENSMUSG00000027580	Helz2	1.27348	1.30932	1.14047	1.43017	1.08142	1.23216	1.45073	1.27707	1.19769	1.18142	1.12316	1.065	1.52896	1.5069	1.52159	1.49824	1.26589	1.28952	1.0308	1.02761	0.941849	1.27174	1.39265	1.1868	1.34013	1.34245	1.25314	1.36241	1.33309	1.25947	1.15958	1.25418	1.13352	1.37663	1.59088	1.36026	1.50654	1.44804	1.49454	0.909302	1.00198	1.0164	1.22774	1.2502	1.18389	1.23851	1.15584	1.32338
ENSMUSG00000027639	Samhd1	5.91546	6.14133	5.98878	5.86852	5.66378	5.83911	6.02895	6.20849	6.30337	5.86162	5.95255	5.90875	5.75014	5.95523	5.70048	5.46053	5.7305	5.86069	5.63076	5.57526	5.60096	5.47867	5.37698	5.31093	5.44893	5.42922	5.43052	5.43682	5.2795	5.3439	5.48788	5.52225	5.65678	5.38469	5.42031	5.41688	5.39414	5.51665	5.49273	5.42635	5.43084	5.58637	5.4322	5.4572	5.60082	5.32407	5.18966	5.2536
ENSMUSG00000027714	Exosc9	6.2494	6.39138	6.30135	6.50266	7.05893	6.64549	6.27638	6.38966	6.50624	6.48873	6.65438	6.69984	6.23415	6.30109	6.3442	6.65663	6.58873	6.6973	6.25578	6.17998	6.31096	6.17107	6.11987	6.03659	6.27531	6.15666	6.27815	6.15718	6.02021	6.23592	6.28973	6.28777	6.39836	6.14949	6.084	6.27236	6.24297	6.18081	6.10016	5.98007	5.89435	5.95398	5.6265	5.50462	5.72021	6.0524	6.06238	5.86309
ENSMUSG00000027752	Exosc8	6.79462	6.72446	6.91265	7.09964	7.78357	7.1053	6.76792	6.81455	6.76234	7.12039	7.07745	7.20315	6.67567	6.60932	6.56897	7.38051	7.13127	7.07721	6.30485	6.29226	6.26164	6.71944	6.7617	6.72061	6.31197	6.19371	6.34109	6.71079	6.69377	6.8445	6.38288	6.26822	6.4014	6.86307	6.82871	6.97864	6.3881	6.32247	6.32995	6.59931	6.42365	6.52131	6.59115	6.52637	6.6929	6.71326	6.42886	6.49115
ENSMUSG00000027763	Mbnl1	3.48722	3.72693	3.62777	4.54096	3.80345	4.46154	3.89847	4.15039	4.34784	4.43894	4.43283	4.48208	4.09719	4.13523	3.94768	4.07196	4.29931	4.41785	4.98043	5.05663	4.94299	4.77612	4.49534	4.49441	4.74346	4.76996	4.79073	4.5814	4.45759	4.52181	4.96533	4.80641	4.68044	4.79008	4.62226	4.44012	3.57166	3.48517	3.41638	5.50494	5.34363	5.50939	5.35634	4.95599	4.93052	5.171	5.15801	5.31057
ENSMUSG00000027774	Gfm1	5.70977	5.81552	5.58143	6.01678	5.51836	5.92744	5.87028	5.90991	5.844	6.0776	6.19694	6.10198	5.471	5.74085	5.58869	6.2149	6.11619	6.02316	5.51106	5.53363	5.63045	5.42266	5.44515	5.20609	5.48029	5.58877	5.51277	5.50103	5.30732	5.28377	5.54364	5.47807	5.56898	5.45384	5.49153	5.48521	5.422	5.27619	5.27904	5.45169	5.43256	5.49842	5.08986	5.1073	4.88262	5.34686	5.48567	5.46697
ENSMUSG00000027787	Nmd3	6.6118	6.72296	6.67529	6.96543	6.91836	7.07574	6.68521	6.64314	6.81076	6.89573	6.73585	6.95577	6.53318	6.58278	6.62326	7.10374	7.23267	7.26958	6.46878	6.35573	6.6037	6.14089	6.08753	6.14027	6.57417	6.63435	6.37088	6.3866	6.16102	6.29681	6.49281	6.52583	6.50502	6.38752	6.20011	6.20146	6.44858	6.3565	6.29082	6.27789	6.09538	6.02297	5.76073	5.68049	5.59697	6.35206	6.37923	6.13825
ENSMUSG00000027796	Smad9	1.78877	1.80882	1.8221	1.29218	1.13345	1.28288	2.24368	2.30523	2.37835	2.077	2.29615	2.14896	1.35224	1.48595	1.55098	1.38848	1.72976	1.95744	2.25862	2.27053	1.93451	2.69048	2.71098	2.42235	1.40556	1.50721	1.22882	2.10508	1.93532	1.91855	1.33351	1.22149	1.3569	2.47182	2.65222	2.41582	2.27117	2.16506	2.11215	2.38351	2.53348	2.4151	3.05077	3.03292	2.94587	1.63387	1.67889	1.76685
ENSMUSG00000028010	Gar1	7.90995	7.91099	7.94154	8.20823	8.76263	8.09814	7.97183	8.03424	7.91035	8.17964	8.02852	8.20513	7.75852	7.84032	7.78917	8.37346	8.25642	8.28669	7.37736	7.37877	7.3425	7.10363	7.29866	7.24893	7.51191	7.36542	7.39812	7.32588	7.38595	7.38281	7.41185	7.52887	7.42501	7.26142	7.28858	7.17486	7.47933	7.34695	7.46438	7.43851	7.35453	7.39617	7.00824	7.08713	7.14768	7.58241	7.45704	7.42056
ENSMUSG00000028069	Gpatch4	5.89782	5.98517	5.91538	6.25885	6.67501	6.19377	5.75371	5.88313	5.76887	6.23512	6.20289	6.19618	5.68223	5.7998	5.80437	6.6382	6.29366	6.42283	5.3859	5.37925	5.47908	5.22252	5.26906	5.13068	5.55062	5.42098	5.41849	5.40341	5.28411	5.49441	5.37628	5.452	5.43946	5.29494	5.36128	5.25132	5.47304	5.48684	5.34885	5.41435	5.38905	5.29791	5.40749	5.18941	5.41621	5.64904	5.63241	5.56954
ENSMUSG00000028134	Ptbp2	6.82516	6.84788	6.85232	7.3013	7.18501	7.40579	6.3369	6.37929	6.68066	6.96045	7.15788	7.11062	6.55144	6.60307	6.56587	7.24413	7.271	7.43981	6.21897	6.1336	6.24479	7.18824	7.15551	7.18319	6.14999	6.17387	6.3897	6.7512	6.7562	6.86646	6.28012	6.26851	6.40724	7.15268	7.03667	7.21189	6.50886	6.48779	6.50993	5.8004	5.68597	5.85651	6.60703	6.59745	6.62691	5.82789	5.76484	5.73446
ENSMUSG00000028137	Celf3	3.65511	3.5461	3.62377	1.31453	0.990344	1.2054	0.0562417	0	0	0.132204	0.346745	0.23361	0.0379501	0.0278451	0.0262591	0.249846	0.905376	0.214296	0.348493	0.470554	0.427332	0.444206	0.328333	0.526961	0.0135578	0.0441517	0.0601765	0.129177	0.0952295	0.162688	0.0481677	0.0728239	0.0147676	0.250173	0.212978	0.0695883	4.8814	4.74345	4.65777	0.102962	0.139641	0.060377	1.03058	1.69935	0.957891	0.0284568	0.0398543	0
ENSMUSG00000028156	Eif4e	6.60527	6.96852	6.96762	7.23924	7.35757	7.49585	6.69922	6.97041	7.07946	7.30672	7.33987	7.34504	6.80777	6.78664	6.84263	7.18562	7.41577	7.59054	6.72069	6.62075	6.70721	6.93842	7.00164	6.88785	6.84	6.77411	6.7379	7.01927	6.88218	7.04614	6.85982	6.81354	6.84241	6.99615	6.81743	7.02527	6.82182	6.80005	6.70605	6.58233	6.53199	6.47516	6.54243	6.56464	6.47248	6.57626	6.55877	6.441
ENSMUSG00000028187	Rpf1	6.6562	6.68822	6.6516	6.79017	7.04784	6.95086	6.70565	6.73646	6.90663	6.81738	6.96588	6.90245	6.61564	6.71805	6.65711	6.92253	6.94439	7.14215	5.97951	6.07367	6.04877	5.9924	5.92601	5.89459	6.06031	6.1183	6.09847	6.01409	5.96782	5.99242	5.95363	6.07008	6.25932	6.03142	5.92787	6.02347	6.17289	6.13765	6.09419	6.07199	6.04671	5.78356	6.0482	6.03813	6.00464	6.14301	6.15378	6.06353
ENSMUSG00000028199	Cryz	4.85907	4.79698	4.81241	5.15125	5.25033	5.14397	4.49203	4.6141	4.64056	5.01171	5.2825	5.10689	4.8632	4.87346	4.63136	5.45828	5.24193	5.28405	4.76068	4.72086	4.81751	5.34385	5.45621	5.2163	4.70357	4.76095	4.76253	5.03017	4.99212	5.25843	5.00755	5.02434	5.24296	5.31737	5.33255	5.4143	4.59262	4.64309	4.63077	4.57711	4.51233	4.52094	4.89254	5.08422	4.88419	4.39845	4.5454	4.34954
ENSMUSG00000028292	Rars2	5.62044	5.58278	5.43335	5.30432	5.55458	5.39653	5.69327	5.53827	5.82938	5.44499	5.65157	5.55683	5.5207	5.62398	5.45635	5.63957	5.53917	5.7111	5.37571	5.2747	5.35767	5.0135	5.02468	4.74078	5.29816	5.28597	5.34257	5.01369	4.87567	4.9635	5.35041	5.3753	5.40189	5.04393	4.91782	4.86786	5.24901	5.2504	5.09176	5.33118	5.22874	5.19882	4.8467	4.67747	4.73413	5.26392	5.37012	5.1888
ENSMUSG00000028318	Polr1e	5.24027	5.49398	5.30157	5.60512	6.15189	5.61033	5.39774	5.57549	5.47544	5.45513	5.71067	5.51685	5.10121	5.27788	5.01927	5.32764	5.64225	5.73307	5.1118	5.07113	5.18944	5.03925	5.21077	4.93845	5.31524	5.26222	5.33734	5.14853	5.08031	5.29023	5.1855	5.33276	5.34813	5.16945	4.99078	5.20843	5.35307	5.31387	5.21279	4.86021	4.94325	5.07095	4.53301	5.0029	4.91097	5.18872	5.1574	5.10262
ENSMUSG00000028405	Aco1	5.23026	5.29543	5.24039	4.70731	4.51719	4.83192	5.53088	5.5679	5.54436	5.07222	5.22323	5.151	5.36742	5.49998	5.35111	5.04131	5.084	5.01991	4.99539	5.02607	5.16456	5.30357	5.26811	5.07185	4.87045	4.95235	4.92717	5.55993	5.23784	5.4517	5.13818	5.19436	5.25389	5.51682	5.41454	5.46192	5.31048	5.30159	5.18212	4.64207	4.83122	4.93692	5.22034	5.40218	5.41364	4.18533	4.32269	4.36309
ENSMUSG00000028484	Psip1	9.89588	10.0636	10.0402	8.89593	8.98546	8.97191	8.1655	8.34301	8.57935	8.8281	8.9406	8.95554	8.42284	8.48337	8.39486	8.96118	8.95817	9.13768	7.84288	7.8865	7.81166	8.57351	8.49831	8.47114	7.8747	7.9089	8.03705	8.47018	8.4501	8.51114	7.91187	7.96906	8.05923	8.61436	8.64643	8.69116	9.87533	9.90164	9.85956	7.78496	7.71718	7.64427	8.46359	8.32626	8.26989	7.84869	7.85418	7.72377
ENSMUSG00000028495	Rps6	5.76938	5.39562	5.93067	5.33412	6.09852	4.86407	5.47216	5.5704	5.23862	5.36341	4.95863	5.7893	6.11513	5.38892	5.87148	5.42423	4.87288	4.44334	4.62448	4.69247	4.64192	4.66306	4.86576	4.99776	5.0323	4.94881	4.85391	4.89778	4.94361	5.49703	4.98864	4.92048	4.82652	4.63871	5.02518	5.0661	5.05907	5.19881	5.36758	6.369	6.16814	6.37733	6.00491	5.92527	6.16055	6.35323	6.34212	6.40128
ENSMUSG00000028546	Elavl4	5.53201	5.5339	5.69462	2.42091	2.25464	2.36768	0.669446	1.305	0.964043	1.37536	1.32327	1.29832	0.939868	1.12365	1.00786	1.68424	2.57688	1.56318	1.66839	1.2586	1.22638	1.37759	1.24088	1.51947	1.06789	0.972506	0.906892	1.42509	1.45761	1.72368	1.45423	1.00362	1.01141	1.76631	1.53608	1.33402	6.44533	6.30592	6.15624	1.22037	1.02269	0.905938	2.21891	2.37799	1.90848	0.670651	0.719926	0.781424
ENSMUSG00000028639	Ybx1	10.2477	10.3895	10.3846	10.7539	10.9898	10.7451	10.058	10.1662	10.1584	10.7088	10.7329	10.6355	10.1066	10.0964	10.1087	10.5881	10.65	10.7549	9.74415	9.61701	9.68535	10.1263	10.2988	10.225	9.69831	9.77336	9.70008	10.0988	10.0889	10.2028	9.88818	9.80047	9.86409	10.2482	10.1546	10.3064	9.88448	9.8838	9.9181	9.96147	10.0012	9.91146	10.0202	10.0612	10.0744	9.91305	9.93654	10.0302
ENSMUSG00000028683	Eif2b3	5.21303	5.34828	5.18702	5.64302	6.08552	5.80058	5.3752	5.4233	5.39021	5.711	5.8616	5.81689	5.04937	5.23812	5.06596	5.85583	5.81821	5.96484	4.9919	5.02384	5.08069	5.08415	5.08834	4.99451	5.20869	5.05881	5.26682	5.1702	4.92525	5.11355	5.20383	5.11636	5.24112	5.07175	5.00598	5.17763	5.08798	5.032	4.9377	5.27101	5.19466	5.2458	4.74806	4.76446	4.79611	5.18316	5.17027	5.0804
ENSMUSG00000028691	Prdx1	9.42954	9.68877	9.66547	9.79557	9.90185	10.0906	9.62331	9.7544	10.0658	9.84479	9.99777	9.90206	9.53397	9.62677	9.49702	9.83337	9.98094	10.3016	9.76613	9.66161	9.7804	9.24325	9.34117	9.20752	9.66478	9.47379	9.66427	9.26327	9.1694	9.29858	9.76846	9.72928	9.83867	9.35026	9.24818	9.41808	9.52229	9.50144	9.35055	9.53358	9.40663	9.37736	8.59015	8.63523	8.53839	9.52083	9.56916	9.25547
ENSMUSG00000028706	Nsun4	3.80918	3.8274	3.74744	3.26293	3.20641	3.44813	3.29193	3.19499	3.16124	3.46141	3.44949	3.53062	3.34932	3.49329	3.22742	3.20347	3.60843	3.42701	3.84906	3.79613	3.79038	3.78274	3.67312	3.67584	3.76776	3.81464	3.80463	3.59705	3.53389	3.70603	3.7901	3.81017	3.81048	3.71896	3.59766	3.62835	4.26703	4.14346	4.15653	3.5571	3.62175	3.63458	3.36903	3.55297	3.56616	3.56507	3.57356	3.66719
ENSMUSG00000028729	Ebna1bp2	7.49885	7.52181	7.55435	7.65063	7.85552	7.7009	7.45376	7.49293	7.51012	7.65576	7.57074	7.54773	7.24365	7.31165	7.35092	7.82071	7.71022	7.79682	6.90498	6.62813	6.97789	6.67886	6.7667	6.52429	6.99895	6.89209	6.85548	6.80971	6.65692	6.84051	6.93992	6.96546	7.07893	6.83032	6.65581	6.72529	7.11487	7.10062	6.94839	6.96634	6.9243	6.77056	6.61382	6.59103	6.59548	6.99529	7.02042	6.92901
ENSMUSG00000028741	Mrto4	6.38692	6.33836	6.38565	6.76646	7.22483	6.78819	6.58909	6.37961	6.30134	6.83857	6.70256	6.64871	6.16187	6.23857	6.12486	7.04063	6.79016	6.7953	6.13595	6.01486	6.33824	6.21153	6.39746	6.35084	6.28029	6.28087	6.20425	6.42648	6.43315	6.50601	6.30849	6.29727	6.36979	6.50882	6.24921	6.44168	6.33983	6.30277	6.38145	6.07081	6.07271	6.15989	5.65661	5.80743	5.85801	6.12885	5.86531	6.12915
ENSMUSG00000028772	Zcchc17	5.43745	5.5719	5.72007	5.9248	6.37045	5.95669	5.491	5.51426	5.20274	6.10562	5.53552	5.79228	5.38829	5.34863	5.59006	6.05439	5.57248	5.77857	5.15983	5.02056	5.19026	5.44789	5.57319	5.70973	5.0432	5.1863	5.11501	5.56951	5.436	5.49685	5.10152	5.2133	5.06794	5.73208	5.46335	5.52646	5.47639	5.36594	5.36935	5.24082	5.20112	5.10541	5.51658	5.53976	5.66425	5.08427	5.3145	5.17387
ENSMUSG00000028820	Sfpq	9.69711	9.89546	9.66387	10.1266	10.1314	10.0647	9.62564	9.85944	9.97526	10.0777	10.3431	10.1232	9.66124	9.8439	9.69213	10.3025	10.1377	10.2402	9.2124	9.29624	9.16064	9.64075	9.43698	9.3066	9.24323	9.1576	9.29502	9.40991	9.20316	9.35079	9.1804	9.20613	9.31973	9.47831	9.55695	9.51587	9.26831	9.27857	9.12145	9.19621	9.21919	9.27151	9.67771	9.43763	9.72005	9.411	9.42965	9.35501
ENSMUSG00000028861	Mrps15	6.4827	6.63734	6.52544	6.95702	7.40417	7.02637	6.45691	6.50767	6.6203	7.02694	6.84358	6.90409	6.40018	6.33237	6.38519	6.87071	6.86403	7.00718	6.00418	6.06552	6.13101	6.35722	6.37776	6.2457	6.20889	6.33243	6.32067	6.58333	6.41234	6.50231	6.15763	6.25484	6.27658	6.54068	6.44399	6.49661	6.31979	6.22079	6.20922	6.12887	6.22122	5.93943	6.25997	6.20553	6.23946	6.32476	6.31984	6.39733
ENSMUSG00000028889	Yrdc	6.11672	5.77391	5.64158	5.6842	5.32456	5.67059	5.78305	5.54651	5.60703	5.67407	6.08428	5.65292	5.39621	5.51705	5.52929	6.11866	5.76895	5.88125	6.1128	5.99843	6.36079	5.24321	5.56181	5.2533	6.03659	5.83759	5.8457	5.49235	5.44081	5.57917	6.06499	5.96375	6.0898	5.49741	5.38545	5.57069	6.14997	6.05858	6.0236	5.93015	5.91524	6.13649	5.20472	5.08878	5.08223	5.85747	5.77652	5.54684
ENSMUSG00000028902	Sf3a3	7.14774	7.23091	7.09862	7.47326	7.69217	7.48995	7.16191	7.21588	7.25732	7.5475	7.70041	7.59753	6.9908	7.15953	6.96547	7.63672	7.5724	7.71878	6.95905	6.8924	6.98379	7.15572	7.19744	7.02816	7.01085	6.94909	6.99785	7.22404	7.0538	7.20358	6.97233	6.98404	7.1335	7.22182	7.15702	7.2307	7.05984	7.04554	6.94161	6.50404	6.61792	6.69084	6.57652	6.61368	6.72687	6.61577	6.74187	6.65071
ENSMUSG00000028907	Utp11l	5.82836	5.93685	5.84207	6.44189	6.8339	6.58712	5.72716	5.80347	6.07039	6.37861	6.48343	6.41316	5.72284	5.90649	5.76332	6.45323	6.52471	6.72694	5.33299	5.23397	5.27309	5.63097	5.66843	5.58142	5.37125	5.36288	5.3926	5.81166	5.63754	5.67824	5.38637	5.28927	5.44707	5.79086	5.64829	5.71232	5.39645	5.31163	5.21294	5.48882	5.43389	5.4042	5.85855	5.95115	5.91326	5.56066	5.64287	5.52053
ENSMUSG00000029066	Mrpl20	7.5984	7.52136	7.53493	7.86523	8.4655	7.97301	7.74776	7.58581	7.48088	8.05829	7.8185	7.87122	7.46871	7.41427	7.41322	7.85269	7.86152	8.06634	7.2692	7.03444	7.16851	7.44186	7.66203	7.46433	7.3186	7.19856	7.32876	7.60607	7.48123	7.71247	7.34445	7.28393	7.39105	7.68564	7.4281	7.70708	7.37881	7.26752	7.18886	7.14797	7.12535	7.03791	7.17852	7.22277	7.24924	7.20091	7.13277	7.0869
ENSMUSG00000029145	Eif2b4	5.81958	6.02892	5.90909	5.87812	5.80938	5.90785	5.85007	5.82638	5.61655	6.10791	6.16544	5.89544	5.70252	5.70562	5.91422	6.10286	5.99075	5.92977	5.1118	5.01993	5.11323	5.47815	5.59776	5.49036	5.31905	5.23188	5.26456	5.44524	5.42531	5.38708	5.2133	5.25938	5.22475	5.53329	5.37426	5.39677	5.43222	5.43101	5.35659	5.27712	5.23406	5.18477	5.46218	5.69244	5.59116	5.34863	5.40872	5.28891
ENSMUSG00000029167	Ppargc1a	1.01318	1.10621	1.20856	0.598722	0.532825	0.663874	1.0607	1.00024	1.0704	0.694507	1.09629	0.751226	0.861298	0.864015	0.979992	0.846158	1.07576	1.04132	1.77936	1.81496	1.53255	1.35784	0.975131	0.908114	1.77353	1.5444	1.49484	0.772422	0.517139	0.44024	1.39722	1.4422	1.46127	0.82327	1.14856	1.29525	2.2174	1.99602	1.90605	1.98142	2.15029	1.88708	2.66484	2.2463	2.09639	1.88177	2.26312	1.66476
ENSMUSG00000029313	Aff1	2.80217	2.87087	2.76516	1.8655	1.33922	1.94649	2.13385	2.32364	1.9254	2.32785	2.32582	2.16183	2.81949	2.7358	2.70674	2.1268	2.22998	2.50995	2.6796	2.63694	2.69211	2.71578	2.46965	2.31933	2.38678	2.37502	2.18657	2.41849	2.21986	2.31426	2.59091	2.67652	2.63861	2.56755	2.74371	2.44255	2.56966	2.61463	2.54834	2.57032	2.39296	2.42063	3.0773	2.92303	2.909	2.09376	2.09252	2.0619
ENSMUSG00000029430	Ran	9.66429	9.09935	9.11659	9.55985	9.33786	9.59616	9.40748	9.12189	9.36793	9.47612	9.94005	9.42576	9.02447	9.18109	9.12016	10.0763	9.75624	9.46702	8.92813	8.62141	8.92636	9.01716	9.34968	8.73278	8.87563	8.88665	9.18343	9.27195	8.95521	9.15094	9.00101	8.90499	9.29633	9.06881	8.89522	9.12313	8.84006	9.0017	8.84861	8.63786	9.00911	8.74507	8.45985	8.88885	8.37302	8.58117	8.71209	8.88766
ENSMUSG00000029486	Mrpl1	4.22519	4.37051	4.40297	4.67775	4.77644	4.75074	4.3543	4.44786	4.6946	4.7214	4.70512	4.81787	4.37628	4.31847	4.36187	4.49137	4.69221	4.92368	4.08696	3.9787	4.01632	4.24633	4.15835	4.2089	4.16313	4.08142	4.26709	4.20771	4.15166	4.31041	4.22998	4.12198	4.31865	4.23813	4.12603	4.2689	4.27736	4.14468	4.126	3.91704	3.88342	3.79932	3.66933	3.78847	3.71848	3.97547	4.06464	3.91069
ENSMUSG00000029557	Ftsj2	4.05061	3.85002	3.87521	3.94465	4.18702	3.8413	3.96862	3.84069	3.77053	3.99661	3.94992	3.9855	3.69166	3.67868	3.63394	4.30547	3.77964	3.84022	3.45228	3.51023	3.44898	4.11521	4.21646	4.09846	3.85249	3.80151	3.71995	4.21866	4.16311	4.25959	3.79402	3.82486	3.65853	4.24151	4.25169	4.27833	4.02214	4.09449	4.11079	2.96724	3.3508	3.10605	3.66978	4.03847	3.76867	3.38349	3.40514	3.37562
ENSMUSG00000029777	Gars	7.20611	7.33988	7.17162	7.45916	7.65061	7.44179	7.02876	7.02392	7.00141	7.37826	7.45243	7.31905	6.80891	6.93031	6.79282	7.47571	7.47518	7.48855	6.84895	6.79786	6.93063	6.83659	6.90917	6.72768	6.82868	6.79535	6.75718	6.89719	6.73531	6.88544	6.81139	6.82147	6.86986	6.8523	6.84059	6.86549	7.12212	7.10057	6.9861	6.60286	6.66788	6.64433	6.35968	6.41442	6.46892	6.65457	6.69517	6.6641
ENSMUSG00000029814	Igf2bp3	7.28281	7.38643	7.29909	7.18301	7.01797	7.20458	7.56856	7.63107	7.65752	7.35096	7.40106	7.33488	7.6357	7.7331	7.59541	7.31357	7.39803	7.41422	7.41089	7.42659	7.46472	6.63785	6.67584	6.63792	7.33676	7.44786	7.39032	6.83731	6.81297	6.8375	7.32037	7.38402	7.41416	6.53601	6.68097	6.6082	6.79065	6.79951	6.81166	6.88426	6.81477	6.85117	5.8928	5.99818	5.95715	6.86217	6.90462	6.9249
ENSMUSG00000029826	Zc3hav1	0.353411	0.361471	0.302847	2.03029	1.69462	2.03024	0.0882146	0.111184	0.125773	1.55909	1.39957	1.47773	0.156672	0.153944	0.142421	1.90428	1.55401	1.42696	0.36208	0.218164	0.345671	1.80206	1.63882	1.5675	0.271924	0.378204	0.369927	1.65636	1.66971	1.43524	0.206126	0.221484	0.262114	1.60197	1.70285	1.54381	0.833075	0.792816	0.731843	0.615047	0.683574	0.688999	1.64333	1.69004	1.75767	0.886294	0.86846	0.821938
ENSMUSG00000029918	Mrps33	3.566	2.93385	3.11644	3.95425	4.43753	4.18423	1.75461	2.96914	3.24556	3.50446	4.52237	4.23342	2.90474	3.21322	2.70339	3.89387	4.25911	4.38957	3.88467	3.70837	3.70598	3.49344	3.98854	3.61844	3.53561	3.71246	3.94982	4.12054	4.02627	4.11472	3.79094	3.75896	3.88046	4.20641	3.81681	4.40868	3.72578	3.93346	3.91184	3.78524	3.67694	3.7563	3.52547	3.88981	3.4924	3.97293	3.62661	3.53021
ENSMUSG00000029922	Mkrn1	6.33644	6.21347	6.36575	4.66939	4.9875	4.67072	5.703	5.67953	5.69256	4.59381	4.42215	4.47537	5.99931	5.94617	5.92185	4.83728	4.60958	4.40274	5.92945	5.99501	6.05049	4.89686	4.91374	4.88183	5.8556	6.01267	6.01586	4.70775	4.58908	4.70334	5.94249	5.98481	5.9599	5.08033	5.10365	5.1677	6.52465	6.50326	6.54854	5.81258	5.88636	5.79568	5.15448	5.11408	5.08096	5.78669	5.80352	5.68672
ENSMUSG00000030056	Isy1	5.83291	5.70594	5.65521	6.12953	6.3915	6.18474	5.62624	5.73249	5.69676	6.21064	6.47978	6.23287	5.50999	5.58757	5.43482	6.63082	6.34398	6.35299	5.50171	5.43056	5.55363	5.93773	6.05581	5.93518	5.61693	5.59032	5.63543	5.99915	5.97746	6.04152	5.6431	5.61819	5.7246	6.10152	6.0507	6.13404	5.7217	5.76305	5.72553	5.24236	5.18805	5.14345	5.47	5.65377	5.52549	5.43235	5.40629	5.26617
ENSMUSG00000030079	Ruvbl1	5.98565	6.10735	5.95649	6.82605	6.86225	6.87113	6.22665	6.18021	6.107	6.64144	6.75042	6.55175	5.90938	6.03785	5.89815	6.93647	6.64332	6.9462	5.80535	5.62896	5.79282	6.13546	6.22872	6.04492	5.96122	5.80939	5.83512	6.11791	5.90945	5.96854	6.10177	6.10675	6.16964	6.09191	6.09203	6.01969	5.81095	5.80176	5.70559	5.57501	5.63362	5.62628	5.66743	5.61815	5.67104	5.69822	5.82949	5.68247
ENSMUSG00000030189	Ybx3	7.40326	7.61041	7.54388	7.69337	7.74984	7.68195	7.34786	7.43832	7.30109	7.58982	7.59927	7.49232	7.23032	7.20642	7.21627	7.43421	7.55518	7.59403	7.24321	7.1026	7.24934	6.75089	6.90997	6.82977	7.16152	7.26842	7.12017	7.17038	7.13842	7.14616	7.2055	7.11568	7.21404	6.89139	6.72584	6.91636	7.58974	7.52224	7.52756	7.21022	7.46954	7.30384	6.45365	6.75725	6.6333	7.2702	7.34891	7.50649
ENSMUSG00000030264	Thumpd3	6.37089	6.29464	6.33211	5.82386	6.21476	5.92863	6.29121	6.39107	6.49257	5.75828	5.94382	5.84918	6.2117	6.29648	6.13991	6.05332	5.91253	5.97347	6.13795	6.07389	6.06401	5.2051	5.2267	5.00479	6.29202	6.07851	6.19826	5.21154	4.96229	5.18676	6.24269	6.13939	6.22448	5.28657	5.09825	5.20067	6.20557	6.18269	6.08052	6.19367	6.13474	6.12591	5.09629	5.0591	5.00835	6.3433	6.302	6.09672
ENSMUSG00000030411	Nova2	1.48932	1.42416	1.35697	1.28077	0.979488	1.12394	0.419651	0.430436	0.329516	1.02148	0.94364	1.01698	0.497999	0.421727	0.496836	1.09248	1.15944	1.08449	0.223451	0.333166	0.302409	1.34346	1.32914	1.14066	0.293415	0.274485	0.228468	1.1203	1.11116	1.05619	0.192996	0.255203	0.200914	1.30368	1.43458	1.23138	1.39479	1.45511	1.38023	0.0878157	0.0942638	0.146488	1.30992	1.28107	1.33584	0.169512	0.146715	0.189155
ENSMUSG00000030512	Snrpa1	6.97234	6.98061	6.97566	7.26956	7.81507	7.39996	6.96864	6.97466	7.08571	7.34886	7.44234	7.3736	6.76199	6.83477	6.71118	7.36573	7.38326	7.49427	6.88417	6.76401	6.88226	6.9078	6.99216	6.82968	6.9084	6.84239	6.81724	7.05261	6.91138	7.01353	6.97023	6.85553	7.01651	7.09639	6.84229	7.04047	6.99708	6.95436	6.86336	6.68308	6.7362	6.69084	6.38095	6.49515	6.567	6.81255	6.77988	6.80383
ENSMUSG00000030515	Tarsl2	2.68587	2.81183	2.76382	2.909	2.87834	3.07214	2.38028	2.44792	2.49613	2.97093	3.06366	3.12722	2.52051	2.36615	2.26299	3.25947	2.89031	3.01461	2.4584	2.39144	2.53883	3.06298	3.04614	2.85722	2.745	2.66426	2.56138	3.2244	3.12288	3.2213	2.68342	2.6307	2.72421	3.19724	3.07623	3.11486	3.44431	3.32767	3.13567	2.18317	2.44273	2.41137	3.10977	3.22593	3.10712	2.81606	2.98829	2.8394
ENSMUSG00000030521	Mphosph10	5.84018	5.99512	5.93607	6.35564	6.6593	6.40751	5.77684	5.97552	6.14831	6.25397	6.42308	6.37222	5.80455	5.87867	5.77592	6.59891	6.39817	6.46951	5.69207	5.4775	5.61651	5.64343	5.62435	5.59854	5.71904	5.56602	5.80769	5.69572	5.56375	5.65083	5.61088	5.6462	5.78906	5.69352	5.55158	5.69705	5.69996	5.58097	5.52742	5.74611	5.53338	5.57134	5.45337	5.47829	5.33225	5.69423	5.66663	5.53574
ENSMUSG00000030590	Fam98c	3.83293	3.54243	3.53645	2.83019	2.92329	2.79922	2.89347	2.6092	2.51864	2.38148	2.30692	2.45665	2.76673	2.83459	2.88317	3.37726	2.68138	2.11998	2.83133	3.03323	3.11021	2.67888	2.62714	2.69517	2.86832	3.06704	3.03874	2.4173	2.29137	2.55757	2.98385	2.87407	3.0749	2.47741	2.30025	2.51008	3.9277	4.04447	3.88674	3.65346	3.5343	3.73982	2.7846	3.02066	2.93603	3.68855	3.54163	3.81825
ENSMUSG00000030598	Fbxo17	3.86956	3.62943	3.6782	2.81669	2.86262	2.80987	3.86486	3.63294	3.80635	2.9149	2.79352	2.86057	3.68527	3.88125	3.79737	2.83678	2.73422	2.6742	3.73952	3.97877	4.12213	3.32652	3.37283	3.12651	3.63656	3.91078	3.85587	3.23387	3.16761	3.21677	3.71782	3.73611	3.82332	3.22013	2.9769	3.04725	3.47799	3.44455	3.58274	3.55198	3.49013	3.28439	3.48114	3.6708	3.52094	3.42672	3.16796	3.33123
ENSMUSG00000030609	Aen	5.69527	5.70786	5.73641	5.68167	5.45124	5.61974	5.85039	5.83963	5.61465	5.46467	5.59862	5.60714	5.64086	5.83004	5.8557	5.62267	5.5131	5.43446	5.48	5.34351	5.57416	4.86162	4.92207	4.71992	5.47123	5.42845	5.34073	5.01368	4.83298	4.92805	5.68346	5.65972	5.60557	4.87276	4.8389	4.77592	5.40257	5.39062	5.26483	5.63854	5.58855	5.68584	4.84488	4.98666	4.716	5.41299	5.3295	5.33
ENSMUSG00000030612	Mrpl46	6.27345	6.23888	6.23811	6.42594	6.86088	6.42687	6.26745	6.23629	6.24481	6.46966	6.34553	6.33228	6.06284	6.08873	6.13021	6.68569	6.31566	6.44142	5.86455	5.70294	5.85514	5.64229	5.88501	5.72667	5.77664	5.60137	5.84943	5.71399	5.73203	5.80705	5.88895	5.86316	5.85189	5.83179	5.63836	5.86778	5.88597	5.85194	5.82481	5.76796	5.61244	5.57896	5.34915	5.25966	5.43101	5.78328	5.73153	5.62004
ENSMUSG00000030619	Eed	6.4885	6.7168	6.74381	6.4564	6.15852	6.32462	5.86431	5.8952	5.97581	6.31309	6.24016	6.26578	5.87715	5.95009	6.10056	6.36632	6.49434	6.31839	5.38387	5.30581	5.43503	5.70667	5.72052	5.6462	5.62351	5.67343	5.67992	5.76497	5.77939	5.84275	5.55945	5.56993	5.63462	5.84323	5.79262	5.81378	6.76883	6.7168	6.62193	5.47826	5.30165	5.32387	5.65244	5.58077	5.33984	5.57482	5.58156	5.32579
ENSMUSG00000030662	Ipo5	7.61996	7.72089	7.56596	7.74907	7.68759	7.77825	7.4091	7.34512	7.36448	7.68843	7.74452	7.62767	7.19897	7.29638	7.14183	7.75066	7.72134	7.73053	7.07756	7.06986	7.12859	7.09826	7.16681	7.00704	7.16104	7.14521	7.03784	7.21905	7.05071	7.17448	7.16058	7.16912	7.18298	6.95032	7.06005	6.99607	7.3403	7.33476	7.25923	6.78422	6.81111	6.84752	6.53887	6.68165	6.63486	6.86471	6.98556	6.92147
ENSMUSG00000030681	Mvp	0.684277	0.494461	0.512553	0.646465	0.844811	0.848583	0.928106	0.692183	0.749829	1.03434	1.17694	0.991266	0.785178	0.692308	0.760602	1.22523	1.15935	1.122	1.15816	0.945161	1.06778	1.45466	1.27427	1.22555	1.01137	1.01366	1.07557	1.55642	1.26691	1.4557	0.866674	0.977296	0.869669	1.51869	1.16298	1.22085	0.983918	0.784784	0.812428	1.45298	1.24199	1.41878	1.49661	1.63746	1.53198	1.07657	1.03593	1.09091
ENSMUSG00000030871	Ears2	4.03123	3.95626	3.73286	3.65316	3.59719	3.55267	4.20323	4.10332	3.8046	3.57226	3.69525	3.52801	3.84583	3.96896	3.91578	3.7795	3.50231	3.41147	3.83962	4.02776	4.06898	3.64005	3.75082	3.68467	4.20017	4.28577	4.15167	3.84346	3.83575	3.84666	4.0716	4.16792	4.18647	3.76113	3.77869	3.8284	4.03656	4.09862	4.09641	3.59979	3.6232	3.59389	3.24192	3.33985	3.04493	3.78196	3.6731	3.64765
ENSMUSG00000030966	Trim21	2.07825	2.21378	2.21445	1.88405	2.17815	2.18188	2.45275	2.33966	2.52492	2.27389	2.15666	2.11584	2.48013	2.408	2.45472	2.46786	2.30176	2.22906	2.09362	2.20984	2.26191	2.03049	2.09566	2.10882	2.14576	2.22213	2.28549	2.02633	1.76291	1.99451	2.07956	2.10912	2.17586	1.47628	1.71155	1.62602	2.17402	2.28533	2.30049	1.73781	1.73783	1.76533	1.64394	1.72125	1.75511	1.70709	1.77996	1.6058
ENSMUSG00000030986	Dhx32	5.9413	5.86522	5.84552	4.32554	4.46409	4.29	3.69632	3.63218	3.61389	4.1418	4.14098	4.08579	3.55714	3.79339	3.70925	4.28026	4.14762	4.23553	4.07444	4.05217	4.08387	4.10472	4.18046	4.09902	3.57415	3.59272	3.68553	3.91147	3.83425	3.90176	3.94495	3.95271	3.96081	4.11227	3.9281	4.03549	6.01102	6.00254	5.98574	3.74474	3.71236	3.79577	3.4761	3.5669	3.48207	3.58188	3.64279	3.46815
ENSMUSG00000031060	Rbm10	6.50238	6.3792	6.35584	6.4723	5.97123	6.39714	6.57962	6.30424	6.14823	6.58846	6.62191	6.40379	6.19337	6.24019	6.30905	6.74619	6.54914	6.53914	5.71269	5.6872	5.69878	6.17944	6.35244	6.05825	5.87035	5.8492	5.62574	6.27696	6.13238	6.22955	5.90589	5.95018	5.85409	6.28894	6.20106	6.26162	6.17305	6.19927	5.97085	5.42231	5.46469	5.46349	5.93093	5.94075	5.8706	5.4764	5.58966	5.59291
ENSMUSG00000031109	Enox2	3.42216	3.42965	3.47524	2.84628	2.68559	3.17528	2.93981	3.02492	3.20451	3.10955	2.81123	3.04248	3.3521	3.11593	3.25118	3.11081	3.06566	2.90802	3.21156	2.90336	3.00303	2.36004	2.55929	2.43542	3.32852	3.01007	3.35391	2.45886	2.36607	2.63014	3.03422	3.08745	3.21999	2.62512	2.32953	2.62924	3.55573	3.43699	3.47763	2.95809	2.82868	2.89948	2.05897	2.20146	2.12676	3.02335	3.25826	3.1323
ENSMUSG00000031134	Rbmx	6.77219	6.86745	6.83486	7.05449	7.23757	7.09509	6.66836	6.79801	6.88089	7.06984	7.1692	7.09399	6.47461	6.5837	6.52075	7.14219	7.13735	7.2163	6.45572	6.38225	6.50124	7.28289	7.1475	7.12791	6.50605	6.47145	6.66144	7.14119	6.99501	7.16037	6.51829	6.50497	6.63539	7.46864	7.27144	7.32099	6.9437	6.86386	6.84282	6.66867	6.73678	6.78283	7.26739	7.2694	7.43217	6.7765	6.69552	6.88223
ENSMUSG00000031189	Aff2	0.567851	0.863942	0.494548	2.7313	1.64421	2.33699	0.814171	1.05214	1.08557	4.37387	4.59304	4.40826	0.82411	0.707165	0.745292	3.74753	4.10904	4.03528	0.305322	0.434565	0.310439	3.03159	2.81752	2.81746	0.491994	0.847547	0.594226	4.03154	3.78675	3.6629	0.362033	0.44345	0.354706	3.10434	3.53406	3.14388	1.06352	0.937647	0.719183	0.351765	0.385064	0.447943	3.03976	3.01293	2.6172	0.480243	0.520618	0.304381
ENSMUSG00000031403	Dkc1	7.54295	7.66682	7.57414	8.15399	7.28374	8.34243	7.67407	7.62539	7.66625	8.02773	8.42669	8.04786	7.27733	7.57495	7.41943	8.07512	8.27561	8.66357	6.87517	6.80492	6.78433	6.75411	6.74315	6.67067	7.07268	6.83038	6.91209	6.90334	6.7162	6.8761	6.97992	6.93402	6.98973	6.8568	6.82125	6.82519	6.86904	6.75445	6.65803	6.9224	6.73086	6.74153	6.80814	6.54869	6.56525	7.04663	7.10871	6.74858
ENSMUSG00000031578	Mak16	5.97223	6.16597	6.0094	6.41198	6.67199	6.48839	6.04487	6.11398	6.31862	6.40874	6.61607	6.50557	5.85194	6.05646	5.92004	6.70607	6.59341	6.72642	5.86221	5.82357	5.86318	5.70803	5.6167	5.59757	5.83116	5.85323	5.8952	5.76785	5.64178	5.74649	5.84331	5.80182	5.95003	5.6932	5.68665	5.63586	5.83855	5.77549	5.78859	5.83407	5.83684	5.83934	5.48622	5.61781	5.58145	5.80087	5.8046	5.86329
ENSMUSG00000031586	Rbpms	6.25106	6.4315	6.34312	6.5349	6.32621	6.47282	7.04301	6.99459	6.84791	5.87466	5.72805	5.69678	6.58217	6.5979	6.76235	5.74557	5.86805	6.01154	5.63092	5.73922	5.98063	5.50033	5.54889	5.45107	5.28899	5.4809	5.53733	4.91615	4.81992	4.87041	5.43235	5.56708	5.53505	4.60796	4.61709	4.67177	5.3846	5.48265	5.50198	5.21666	5.03657	5.03743	5.01578	5.02715	5.01353	4.95778	4.87499	4.9527
ENSMUSG00000031639	Tlr3	0.585601	0.776898	0.615979	0.854176	0.517159	0.933267	0.208555	0.351857	0.399761	0.764379	0.742456	0.789899	0.47875	0.390711	0.328594	0.229398	0.801297	0.867253	0.659599	0.716322	0.697623	1.0713	0.858108	0.823537	0.408773	0.348993	0.464499	0.846383	0.743169	0.811986	0.494494	0.400476	0.47509	0.81948	0.907106	0.714464	0.846971	0.849199	0.747176	0.605692	0.618887	0.625534	1.14083	1.00539	1.02815	0.496539	0.461526	0.470119
ENSMUSG00000031683	Lsm6	7.5308	7.26685	7.33456	7.73196	8.41655	7.81662	7.42937	7.43806	7.52077	7.7452	8.03712	7.86262	7.32399	7.38923	7.35696	8.10308	7.88974	8.04255	6.79815	6.7667	6.92011	7.24637	7.42049	7.22089	6.9379	6.83281	6.9847	7.37315	7.20126	7.42355	7.02411	6.92567	7.17841	7.3083	7.18394	7.34623	7.02912	7.03429	7.06214	7.01821	7.07059	7.14934	7.22159	7.25108	7.38759	7.13762	7.09885	7.05724
ENSMUSG00000031843	Mphosph6	5.73662	5.97959	5.93372	5.96253	6.52551	6.07415	5.90408	6.09218	6.07663	6.14923	6.12421	6.08976	5.96627	5.96244	5.96669	5.85197	6.05441	6.17805	5.46177	5.31624	5.43917	5.117	5.22272	5.10918	5.41	5.41901	5.47823	5.12338	5.05507	5.15629	5.37339	5.36879	5.51499	5.22473	5.09874	5.16464	5.32616	5.28964	5.25	5.67626	5.69509	5.64759	5.45663	5.52116	5.64049	5.652	5.74876	5.81905
ENSMUSG00000031917	Nip7	5.49488	5.52165	5.49283	5.77044	5.97646	5.89875	5.55946	5.56174	5.70324	5.75544	5.90205	5.83604	5.40755	5.44936	5.35309	5.87681	5.89068	6.02693	5.35708	5.23764	5.43842	5.13027	5.29964	5.07753	5.51282	5.28526	5.59259	5.42805	5.27119	5.48629	5.50836	5.4391	5.68727	5.34054	5.20864	5.50117	5.48618	5.47501	5.37653	5.26885	5.19919	5.18055	4.77847	4.85864	4.77681	5.46809	5.27844	5.10617
ENSMUSG00000031948	Kars	7.49918	7.63875	7.57275	8.04243	8.08868	8.04365	7.59	7.49846	7.41512	7.96843	7.9098	7.82299	7.32799	7.37585	7.39522	8.04442	7.94126	8.02563	7.37435	7.25875	7.35892	7.48556	7.61458	7.56739	7.4236	7.44376	7.29954	7.62536	7.54143	7.60472	7.46133	7.47418	7.46967	7.69343	7.55404	7.59943	7.49035	7.43498	7.39926	7.06185	7.20221	7.20234	7.0485	7.19033	7.27182	7.10501	7.21647	7.3186
ENSMUSG00000031949	Adat1	3.78416	3.88575	3.69369	3.76638	3.42511	3.71577	4.02211	4.03814	4.03332	3.83577	3.85658	3.82395	3.85964	4.00512	3.96836	3.93557	3.79885	3.82436	3.52697	3.67408	3.53905	3.49322	3.52668	3.42609	3.79876	3.78896	3.6528	3.49599	3.49587	3.42303	3.77872	3.73998	3.75099	3.58375	3.65486	3.55648	3.64363	3.63199	3.54555	3.3372	3.35179	3.49088	3.17946	3.13718	3.17951	3.45725	3.41407	3.47503
ENSMUSG00000032026	Rexo2	5.78076	5.86188	5.71808	6.18194	6.54765	6.3321	5.71018	5.65498	5.65245	6.00799	5.98321	5.99076	5.50057	5.53268	5.4745	6.19445	6.08488	6.20216	5.29713	5.2549	5.32776	5.19846	5.26799	5.24358	5.2773	5.35009	5.05405	5.17958	5.16713	5.19005	5.45685	5.31913	5.37407	5.25333	4.9953	5.13478	5.29069	5.36542	5.30429	5.639	5.8348	5.67584	5.2935	5.41735	5.31944	5.9805	5.9974	5.97166
ENSMUSG00000032101	Ddx25	3.54828	3.52191	3.6746	4.21228	4.59966	4.25894	4.45563	4.49206	4.53345	3.79987	3.85365	3.85371	4.13809	4.11359	4.14816	3.60835	3.88734	3.75188	3.9797	4.15249	4.05055	3.90346	3.92274	3.9365	4.31725	4.33496	4.37661	3.9137	3.91632	3.95863	4.25931	4.22	4.32366	4.05131	3.91206	3.86323	3.51049	3.49015	3.4592	3.50818	3.59077	3.56636	3.72697	3.6873	3.74488	3.69659	3.70454	3.54199
ENSMUSG00000032265	Fam46a	1.18972	1.21758	1.34739	0.178309	0.134352	0.301516	0.646768	0.724715	0.855853	0.331886	0.178349	0.302951	1.09003	1.13859	1.17322	0.269775	0.188602	0.232409	0.940355	1.12513	1.13461	0.553203	0.4661	0.499107	0.668087	0.862346	0.848376	0.410813	0.345428	0.261473	0.929751	1.00348	0.976304	0.966728	1.00239	0.762317	1.29811	1.42497	1.38918	0.634613	0.657382	0.627604	1.60704	1.67273	1.44852	0.557466	0.372414	0.431167
ENSMUSG00000032297	Celf6	0.49755	0.285227	0.348499	0.0878215	0.177015	0.135453	0.034572	0.0442931	0.0149394	0.267183	0.0278751	0.0278946	0	0.041234	0.0139101	0	0.146885	0	0.110431	0.0908444	0.149745	0.243271	0.281937	0.146183	0.204559	0.031206	0.0279216	0.0782592	0.0391606	0.0516231	0	0	0	0.0695937	0	0.128762	1.47859	1.50525	1.38109	0.0278697	0.222103	0.0636201	0.172838	0.411921	0.361355	0.0150756	0	0.0948245
ENSMUSG00000032387	Rbpms2	2.6422	2.82653	2.61809	3.84394	4.03688	3.74717	2.56554	2.55575	2.48286	4.28583	4.07235	4.11907	2.40281	2.73604	2.53299	4.13931	3.94499	4.06172	0.675738	0.782663	0.830448	3.79221	3.90391	3.69707	1.56902	1.50574	1.33837	4.38404	4.17164	4.23426	1.36784	1.48017	1.45461	4.41303	4.22726	4.36305	1.98093	2.16011	2.10946	0.86351	0.965294	0.985919	3.59487	3.66447	3.60361	1.17408	0.934868	1.35206
ENSMUSG00000032459	Mrps22	5.99852	6.10042	6.12551	6.49825	6.84385	6.64718	6.05662	6.14592	6.26619	6.58819	6.51602	6.53271	5.96296	5.99115	5.93364	6.16847	6.60255	6.77134	5.68302	5.53018	5.71034	5.98982	6.0765	6.09376	5.85175	5.94606	5.81581	6.06642	6.03815	6.12654	5.79414	5.81715	5.85319	6.26082	5.9649	6.19761	5.95907	5.95799	5.87038	5.53876	5.57932	5.2592	5.54613	5.61263	5.30236	5.68709	5.79416	5.6303
ENSMUSG00000032497	Lrrfip2	4.41981	4.5652	4.59623	4.79384	5.03886	4.87902	4.39362	4.45226	4.51826	4.57374	4.50919	4.498	4.40915	4.47596	4.42675	4.52201	4.66602	4.66974	3.95611	3.88393	4.05625	4.41188	4.4356	4.26134	3.97137	4.15911	4.13177	4.1819	3.98563	4.20512	3.89967	4.02702	4.02136	4.19682	4.21853	4.24413	4.27966	4.24313	4.23678	3.82302	3.90771	3.70454	4.25385	4.24263	4.29436	3.81732	3.83243	3.9727
ENSMUSG00000032518	Rpsa	10.7611	10.6673	10.6154	10.9634	11.049	10.9734	10.8343	10.6412	10.4193	10.9104	10.8571	10.7308	10.4726	10.5352	10.6568	10.9681	10.8245	10.9833	10.1769	9.90529	10.15	10.1527	10.3997	10.1495	10.2784	10.1903	10.2868	10.1586	10.119	10.1615	10.2437	10.2523	10.2736	10.2838	10.056	10.2861	10.228	10.1865	10.07	10.1528	10.1618	10.1	9.96182	9.89241	10.0616	10.2305	10.3444	10.1984
ENSMUSG00000032565	Nudt16	3.008	2.84929	2.94509	1.78914	1.98053	1.4945	2.18103	2.24337	2.26266	2.14749	1.79981	1.9035	2.34682	2.69171	2.47322	1.57287	1.76681	1.76222	2.59512	2.62127	2.6858	2.34723	2.40618	2.18262	2.64927	2.71476	2.55021	2.13086	2.11234	2.18657	2.6016	2.58935	2.58552	2.27217	2.09677	2.28335	3.58692	3.59806	3.81067	2.35132	2.2198	2.06328	2.3928	2.37263	2.59061	2.46879	2.55705	2.55235
ENSMUSG00000032604	Qars	3.1627	3.03692	2.8178	3.62986	5.85905	3.73147	3.9096	2.39412	4.18512	3.75622	3.92583	3.63234	3.1778	3.78253	2.71469	3.12301	3.83117	4.16188	3.17756	2.90795	3.42635	2.77182	2.73124	2.56461	2.73685	3.4212	3.22269	2.50291	2.03992	2.82246	2.23037	2.76449	3.57597	3.41152	3.20839	2.6592	1.51932	1.97523	1.92828	3.69112	3.89491	3.57518	3.11918	3.06985	4.78398	4.34097	3.7474	3.87597
ENSMUSG00000032940	Rbm11	0.805435	0.947512	0.919731	0.558551	0.393729	0.409825	0.290072	0.286358	0.295129	0.123926	0.239835	0.134625	0.200906	0.296443	0.278588	0	0.516352	0.349844	0.241501	0.36342	0.613599	0.696245	0.682132	0.57636	0.145037	0.211848	0.184265	0.600319	0.270393	0.36772	0.318729	0.263299	0.307031	0.49137	0.438916	0.467173	1.65194	1.78474	1.58555	0.567299	0.32642	0.282917	0.742029	0.629938	0.527194	0.12598	0.161158	0.122923
ENSMUSG00000033020	Polr2f	7.93656	7.76115	7.86031	8.09323	8.27762	8.06522	8.02923	7.79385	7.6248	8.03045	8.22021	7.9594	7.65634	7.65949	7.72111	8.59637	8.12655	8.14007	7.72841	7.54675	7.86348	7.48437	7.84294	7.47615	7.7215	7.71346	7.67576	7.65305	7.5987	7.73952	7.84275	7.78681	7.96325	7.67031	7.44609	7.72124	7.76289	7.76344	7.72557	7.48086	7.69168	7.71893	7.04256	7.46143	7.34743	7.65476	7.69766	7.77527
ENSMUSG00000033166	Dis3	5.3457	5.46918	5.34924	5.61559	5.29381	5.6709	5.22784	5.37579	5.42255	5.52593	5.69122	5.58069	5.12309	5.25419	5.12236	5.72356	5.70438	5.72883	5.09023	4.97134	5.0272	5.20993	5.09602	5.07955	5.18033	5.09414	5.20975	5.19204	5.03899	5.14951	5.03189	4.99823	5.14365	5.16833	5.15259	5.17932	5.15211	5.07196	5.09903	4.92951	4.87679	4.98403	5.06936	5.11918	4.87001	5.07164	5.1256	4.95622
ENSMUSG00000033222	Ttf2	4.47833	4.60087	4.42514	4.53521	4.29056	4.66136	4.59399	4.60933	4.50159	4.66449	4.72276	4.67317	4.44866	4.54855	4.33561	4.64785	4.78206	4.77784	4.56094	4.53482	4.54127	4.55025	4.54784	4.51408	4.47132	4.55201	4.55037	4.48839	4.47054	4.53948	4.45353	4.58265	4.52551	4.51182	4.61951	4.53565	4.46806	4.43627	4.3743	3.84949	3.81702	4.01698	3.92161	3.8714	3.83219	4.09511	3.98186	3.91656
ENSMUSG00000033285	Wdr3	5.41341	5.61681	5.38978	5.54813	6.00394	5.75726	5.47785	5.46837	5.59696	5.56014	5.70595	5.56308	5.28921	5.5764	5.31578	5.80224	5.70935	5.78171	5.56621	5.39072	5.45617	5.17433	5.14307	4.98545	5.5629	5.47865	5.73541	5.17865	5.04573	5.26773	5.4998	5.64116	5.55594	5.45381	5.2152	5.18044	5.39013	5.4235	5.31138	5.17311	5.13432	5.27479	4.69519	4.69588	4.70977	5.15276	5.25807	5.12056
ENSMUSG00000033356	Pus7l	3.02411	2.894	2.85041	3.68425	3.69777	3.81998	2.7851	2.84606	2.88171	3.46535	3.51469	3.4064	2.62246	2.80971	2.67864	3.76292	3.64844	3.73269	2.77961	2.65445	2.73308	3.33908	3.36037	3.24491	3.04757	3.00121	2.96276	3.26347	3.11097	3.27284	2.79528	2.72332	2.87169	3.32779	3.22104	3.17136	2.95254	2.80254	2.84597	2.76128	2.90061	2.80349	3.2167	3.32396	3.13554	2.97839	3.00416	2.93341
ENSMUSG00000033499	Larp4b	5.49128	5.71124	5.57577	5.29628	4.77477	5.36343	5.48994	5.59838	5.59609	5.21241	5.281	5.20488	5.4728	5.48547	5.49868	5.20567	5.27741	5.30783	5.54572	5.54566	5.56528	5.0879	4.94831	4.81884	5.47887	5.53886	5.47142	5.03168	4.83247	4.9643	5.45023	5.44635	5.39247	4.95668	5.09126	4.88923	5.61015	5.56308	5.50619	5.28668	5.27357	5.35466	4.75959	4.69017	4.59238	5.20326	5.24827	5.30961
ENSMUSG00000033565	Rbfox2	5.62016	5.6673	5.61982	6.19389	5.68706	6.21213	5.70151	5.73377	5.71205	6.101	6.13792	6.06022	5.80134	5.80128	5.79541	6.16271	6.15908	6.14971	5.89043	5.83423	5.84495	6.67202	6.6476	6.54155	6.06338	6.09916	6.09755	6.63967	6.50034	6.50267	6.08217	6.08853	6.05882	6.48724	6.62796	6.4633	6.01746	6.01999	5.91967	5.64513	5.6529	5.65122	6.57426	6.52331	6.53677	5.7354	5.75921	5.73278
ENSMUSG00000033644	Piwil2	0.0499793	0.0346628	0.0386139	0.0464683	0.0234437	0.0853053	0.048308	0.0570274	0.0786495	0.0239091	0.0465142	0.0208192	0.0264093	0.0918747	0.0603564	0	0.0203622	0.0376723	0.136575	0.150878	0.154671	0.0503186	0.074126	0.0743908	0.0681049	0.0675509	0.117126	0.0554202	0.0543364	0.0614213	0.018944	0.105671	0.0679692	0.0599365	0.070203	0.0451274	0.0482612	0.0634683	0.0259962	0.246323	0.180173	0.17966	0.0958837	0.111214	0.0795283	0.0999718	0.0273092	0.260245
ENSMUSG00000033658	Ddx19b	4.1611	4.16302	4.19028	3.27649	3.13178	3.44348	3.99624	4.0281	4.08951	3.05745	3.21618	3.05063	4.1126	4.13234	4.00964	3.2574	3.3892	3.41601	4.03501	4.0516	4.04431	2.9904	2.9638	3.00405	4.15611	4.13948	4.20099	2.72482	2.66249	2.80612	4.13366	4.1407	4.15351	3.14322	3.32073	3.2057	4.06809	4.04798	4.05395	3.84731	3.6877	3.6512	2.79947	2.62973	2.5856	3.86573	3.89177	3.71926
ENSMUSG00000033760	Rbm4b	5.48866	5.52968	5.55265	5.65199	5.56537	5.68602	5.35292	5.38218	5.27802	5.73882	5.60303	5.57572	5.47463	5.46775	5.60341	5.47664	5.70904	5.78259	5.33951	5.40706	5.43265	6.04838	6.07733	5.9406	5.38605	5.52991	5.36186	5.94945	5.8071	5.89702	5.47952	5.49588	5.45207	6.11431	6.03747	6.08801	5.62269	5.60075	5.52081	5.06987	5.17971	5.09398	5.78068	5.97535	5.92139	5.07571	5.11641	5.09501
ENSMUSG00000033871	Ppargc1b	0.891949	1.08368	1.08816	1.10048	0.478637	0.841527	1.51824	1.54567	1.47626	0.891297	0.910695	1.04444	1.0263	0.963834	1.11313	0.496001	0.654515	0.661935	1.90859	1.80974	1.85965	0.82693	0.702604	0.676508	2.08412	2.05094	1.88046	1.37122	1.32301	1.31788	2.00481	1.91073	1.67443	1.12755	1.17839	0.795386	0.838113	0.753682	0.738405	2.06383	2.1751	2.17779	1.01124	1.05418	1.02504	2.2626	2.2596	2.31008
ENSMUSG00000033882	Rbm46	0.364051	0.32118	0.345068	1.62925	1.58041	1.60829	0.566708	0.670233	0.764593	1.47107	1.4958	1.39247	0.961552	0.975365	0.902743	1.59674	1.46384	1.57787	1.24853	1.24533	1.16473	2.23135	2.12125	1.96276	1.07351	1.00664	1.1977	1.80992	1.87593	1.57069	1.47311	1.30684	1.31714	1.69153	1.46736	1.32523	0.596777	0.521365	0.451787	1.15623	1.04425	1.0477	2.51159	2.32883	2.16356	1.03309	1.15109	1.1321
ENSMUSG00000034163	Zfc3h1	4.25702	4.53186	4.25176	4.18502	4.26272	4.21407	4.37441	4.68514	4.81168	4.37374	4.33987	4.513	4.67564	4.79304	4.76898	4.11062	4.44019	4.54782	4.67031	4.66236	4.58171	4.52415	4.20703	4.14396	4.63287	4.69887	4.79239	4.64464	4.41776	4.4768	4.75204	4.72021	4.70913	4.70124	4.41824	4.30288	4.48834	4.27519	4.34852	5.05881	5.23214	5.51031	4.56163	4.616	5.45785	5.30682	4.68982	5.42656
ENSMUSG00000034192	Lsm3	8.51829	8.51555	8.57697	8.87086	9.47242	9.03597	8.58668	8.57485	8.75672	8.8795	8.91315	9.02294	8.50315	8.36526	8.43453	8.9932	8.94695	9.10223	7.81748	7.72104	7.87791	8.11122	8.27797	8.18052	7.96946	7.86108	7.90705	8.10903	8.00424	8.33931	7.9687	7.90559	8.07696	8.20359	8.19482	8.47144	7.97394	7.92747	7.81382	8.13341	8.01517	8.04087	8.00927	8.08773	8.15587	8.31299	8.2519	8.18284
ENSMUSG00000034442	Trmt5	4.66238	4.81531	4.75307	4.86884	4.91209	4.83342	4.66158	4.82009	4.93307	4.83591	4.90693	4.79443	4.68315	4.77746	4.66439	4.79715	4.91314	4.91322	4.53287	4.55059	4.50771	4.50601	4.42901	4.32929	4.55901	4.47712	4.48894	4.33132	4.2709	4.39269	4.40777	4.47539	4.65646	4.22772	4.36942	4.26957	4.44866	4.48992	4.43927	4.23706	4.19956	4.22677	4.06106	3.87101	3.93638	4.24019	4.34481	4.27533
ENSMUSG00000034459	Ifit1	0.200167	0.274531	0.190962	0.0301212	0	0.0154037	0.64399	0.819613	0.769768	0.0623613	0.0461134	0.0408811	0.825971	0.736361	0.727873	0.0975032	0.0777203	0.0870571	1.73226	1.91205	1.82043	0.109185	0.166277	0.0800735	1.93584	1.95836	2.07361	0.220217	0.0848413	0.105763	1.41218	1.55113	1.5398	0.233228	0.207957	0.0998263	0.714627	0.667723	0.624592	1.33468	1.11576	1.14567	0.158337	0.0815808	0.268551	1.28296	1.34314	1.28312
ENSMUSG00000034610	Zcchc11	6.48984	6.48025	6.3426	6.93117	6.73216	6.8729	6.47525	6.4183	6.49848	7.18385	7.15797	7.14616	6.63767	6.57931	6.47685	7.07206	7.11166	7.01321	6.03643	6.23821	6.25152	6.87854	6.7097	6.53016	6.10938	6.18411	6.22497	7.26217	6.91701	7.08261	6.04374	6.14934	6.13318	6.63855	6.75949	6.59583	6.28243	6.22589	6.21743	6.22003	6.15118	6.24396	6.64806	6.53771	6.89346	6.0183	5.87294	6.09284
ENSMUSG00000034640	Tiparp	4.59758	4.80062	4.79066	4.49181	4.35672	4.8158	5.27189	5.33086	5.64392	4.42287	4.57782	4.66089	5.1795	5.31344	5.21108	4.89395	5.22712	5.41751	4.73373	4.73292	5.07354	4.42393	4.28636	4.18855	4.72725	4.79146	5.00378	4.18233	4.06273	4.13296	4.71111	4.83453	4.87633	4.10249	4.18078	4.2222	4.38531	4.43591	4.28227	4.46623	4.24078	4.10684	4.39173	4.32279	4.23053	4.13326	4.32715	4.10705
ENSMUSG00000034818	Celf5	1.34754	1.04089	1.48748	0.880567	1.27178	0.640606	0.47921	0.405269	0.240539	0.538253	0.440608	0.371243	0.50804	0.569146	0.491371	0.793165	0.407383	0.507158	0.731593	0.4749	0.34096	1.49978	1.31748	1.23286	0.365612	0.440466	0.230727	0.823868	0.497738	0.708236	0.238861	0.413734	0.347911	1.13391	0.964543	0.825496	1.94511	1.96776	1.75358	0.267875	0.429756	0.395115	1.63937	1.84384	1.9735	0.403221	0.348082	0.548111
ENSMUSG00000034839	Larp6	0.351515	0.310461	0.301617	0.668563	1.2962	0.556282	0.395923	0.499399	0.417705	0.682714	0.334942	0.526995	0.559246	0.389057	0.380858	0.451617	0.54078	0.347971	0.413143	0.386923	0.400769	1.86355	1.81157	1.71476	0.503802	0.750333	0.703656	1.38132	1.11944	1.49698	0.509832	0.448317	0.575946	1.72579	1.35667	1.55029	0.617968	0.63103	0.519358	0.236575	0.371114	0.171215	2.48089	2.66713	2.55081	0.480453	0.520057	0.369705
ENSMUSG00000034892	Rps29	5.01564	4.94849	4.89089	5.2499	5.49928	5.26973	4.97328	4.71372	4.57604	5.27393	5.26798	5.24727	4.61378	4.45468	4.44744	5.55848	5.5207	5.55759	4.39571	3.73454	4.19283	4.15445	4.53371	4.29828	4.12045	4.31714	4.64589	4.37491	4.34572	4.39108	4.11769	4.21839	4.15955	4.30563	4.14215	4.52064	4.48529	4.20134	4.29603	4.30427	4.31699	4.58392	3.87217	4.29221	4.05525	4.4489	4.50322	4.55591
ENSMUSG00000034908	Sidt2	4.97747	4.87788	4.91858	4.5565	4.1106	4.54576	5.1475	5.10049	4.74767	4.6196	4.43886	4.12654	5.16966	5.21043	5.29818	4.65328	4.42561	4.42264	5.65407	5.6556	5.6567	4.81381	4.77864	4.62032	5.4065	5.41248	5.4061	4.69419	4.55252	4.50321	5.62145	5.70518	5.60282	4.6841	4.72198	4.57316	4.87825	4.82505	4.90436	5.75933	5.67282	5.86174	4.83786	4.68748	4.9274	5.41717	5.48832	5.58439
ENSMUSG00000034949	Zfr2	2.29251	2.09384	2.1031	0.697565	0.777821	0.959111	2.36066	2.08546	2.30321	1.25958	0.982222	0.951012	2.8979	2.7831	2.97235	1.38686	0.861102	0.650377	2.43082	2.54891	2.6842	2.27475	2.16852	1.99557	2.53631	2.58639	2.63559	2.28029	2.29131	2.16489	2.5655	2.59979	2.44423	2.23566	1.93436	2.06085	2.48963	2.49037	2.51711	2.88921	2.94553	2.93692	3.3066	3.45235	3.37811	2.96041	2.50606	3.06799
ENSMUSG00000035045	Zc3h12b	1.44738	1.60621	1.55744	2.08986	1.38389	1.99562	1.31807	1.34133	1.32523	2.09985	2.13644	2.04089	1.47867	1.47728	1.60034	1.8876	2.07525	2.067	1.49544	1.4728	1.27989	2.46281	2.248	2.08224	1.38168	1.40416	1.1491	2.18317	1.84107	1.97892	1.52426	1.37768	1.41868	2.08165	2.13484	2.04641	1.47065	1.40463	1.39952	1.37463	1.33122	1.22418	2.54064	2.43587	2.26468	1.02695	1.07363	1.18924
ENSMUSG00000035049	Rrp12	4.19882	4.21276	3.98315	4.10512	3.71357	3.93365	4.02996	3.85935	3.56478	3.81431	4.01108	3.75856	3.59982	3.75105	3.66823	4.16568	3.97749	3.78131	3.76948	3.91034	3.88533	3.52987	3.66117	3.66521	3.93575	3.91705	3.80032	3.7303	3.64048	3.68199	3.85351	3.91735	3.80859	3.42662	3.60679	3.52973	4.25734	4.35387	4.29637	3.25382	3.45989	3.67862	2.93254	3.17513	3.12162	3.44388	3.4427	3.57402
ENSMUSG00000035064	Eef2k	4.76272	4.71857	4.72158	6.28856	6.08788	6.01603	5.7276	5.62995	5.40312	4.94922	5.14821	5.05755	5.43726	5.50837	5.25009	5.41704	5.43397	5.37062	5.34723	5.35293	5.54223	5.3059	5.43082	5.05988	5.65265	5.3872	5.43703	4.9439	4.47986	4.80944	5.44467	5.40391	5.43507	4.82899	4.48708	4.63089	4.5115	4.6002	4.37852	5.05521	5.02227	4.98137	5.41905	5.49149	5.36687	5.02053	5.05215	5.07729
ENSMUSG00000035164	Zc3h12c	2.66765	2.77032	2.68706	1.70083	0.875322	1.53466	2.53519	2.54652	2.58534	1.70386	1.90458	1.8135	2.69297	2.69091	2.63616	1.6453	1.9084	1.73502	2.70193	2.67042	2.62801	2.04082	1.85222	1.80674	2.72701	2.75155	2.8472	2.27056	2.17665	2.18744	2.72613	2.7315	2.69815	2.20657	2.21624	2.07177	2.91161	2.89091	2.8557	2.2648	2.27704	2.18292	2.11845	2.0186	1.70667	2.45348	2.36248	2.34229
ENSMUSG00000035215	Lsm7	3.4591	2.88317	3.47514	3.27663	4.02075	2.68717	3.0641	3.1828	2.87536	3.26056	2.971	3.02126	3.27146	2.81896	3.19698	3.44392	2.45571	2.60248	3.01891	2.6447	2.50768	2.85081	2.95676	2.79114	3.04284	2.59673	2.86435	2.89608	3.00852	3.04254	2.87052	2.68399	2.55983	3.07763	2.99214	3.18749	2.35998	3.0067	3.29436	3.50224	3.26395	3.43992	3.53843	3.32529	3.75222	3.63519	3.48943	3.35019
ENSMUSG00000035275	Raver2	5.29558	5.38428	5.39123	3.90994	3.70152	3.92234	4.41403	4.47261	4.40292	3.92708	3.81109	3.91169	4.45962	4.42921	4.61718	3.49714	3.60615	3.67773	4.47321	4.40419	4.47285	4.40837	4.38744	4.13832	4.51999	4.54494	4.40141	4.33581	4.14051	4.21165	4.51391	4.48265	4.44954	4.22945	4.16898	4.07678	5.35331	5.2841	5.2347	4.44625	4.32666	4.33332	4.64437	4.65775	4.65657	4.43725	4.65568	4.62919
ENSMUSG00000035517	Tdrd7	3.1087	3.0199	3.01097	1.85333	1.84788	1.8291	1.98225	2.08356	2.36175	1.40805	1.31662	1.36887	2.55312	2.66253	2.57712	1.45882	1.72013	1.56998	2.17092	1.94911	2.06808	2.16282	2.07705	2.00958	1.94237	1.95517	1.98605	1.82888	1.70415	1.9782	2.34102	2.15761	2.38709	2.13043	2.03897	1.76245	3.34226	3.24475	3.23625	1.61204	1.86954	1.83179	2.25001	2.40764	2.41719	1.64137	1.74923	1.64135
ENSMUSG00000035530	Eif1	8.35498	8.28285	8.18546	8.47494	8.86271	8.72495	8.20541	8.24627	8.27452	8.64418	8.47222	8.61656	8.04402	8.0611	8.01891	8.52747	8.53922	8.92783	8.62717	8.56071	8.82764	8.43942	8.56091	8.44056	8.62481	8.5802	8.55888	8.6905	8.4606	8.58262	8.68956	8.61471	8.65028	8.69384	8.44451	8.60723	8.7362	8.56085	8.51162	8.13223	8.18875	8.01263	7.58853	7.73585	7.68296	8.13623	8.03466	8.09145
ENSMUSG00000035575	Utp6	6.36389	6.30101	6.2325	6.79863	6.48079	6.78782	6.33199	6.23638	6.35377	6.58303	6.9144	6.67152	6.15223	6.25156	6.13642	6.96426	6.83698	6.90997	5.99112	5.97812	5.94371	6.30902	6.3195	6.1258	5.9425	5.76403	5.98322	6.20115	6.10172	6.10536	6.04381	5.95462	6.2031	6.21402	6.22352	6.17533	5.89051	5.89836	5.87671	5.93456	5.87131	5.98751	6.23728	6.23068	6.11394	6.03789	6.01308	5.83413
ENSMUSG00000035649	Zcchc7	4.41001	4.55086	4.40377	4.09151	4.04762	4.07444	4.14105	4.39067	4.61484	4.14606	4.08781	4.1056	4.55192	4.46811	4.39748	4.19562	4.1241	4.01647	4.39475	4.39763	4.25101	4.20976	3.89422	3.61994	4.66616	4.50757	4.30539	3.8462	3.37353	3.69015	4.34442	4.37016	4.33426	3.85605	3.62979	3.48358	4.49996	4.26621	4.22753	4.65025	4.78129	4.8075	4.69198	4.42988	4.45757	4.9537	4.92261	4.96622
ENSMUSG00000035960	Apex1	8.8179	8.87969	8.8517	9.10329	9.38025	9.19346	9.00013	9.01977	9.00249	9.31069	9.29586	9.26356	8.91989	8.97817	8.92252	9.35811	9.31976	9.33094	8.61276	8.58786	8.74	8.42161	8.69807	8.48447	8.63574	8.6115	8.65895	8.59988	8.50356	8.75043	8.66433	8.66901	8.81851	8.61274	8.57924	8.84098	8.61916	8.57466	8.50501	8.40392	8.37593	8.33553	7.92997	8.06613	7.92609	8.38782	8.36381	8.27405
ENSMUSG00000035967	Ddx26b	3.69618	3.8487	3.63218	4.49999	4.92004	4.544	3.49775	3.51523	3.68474	4.63157	4.57288	4.67913	3.65597	3.90747	3.74933	4.31589	4.45987	4.4672	3.9951	3.92983	3.904	4.8773	4.62357	4.56063	4.01555	3.97993	4.18675	4.26134	4.21195	4.26084	3.95749	3.93675	4.04993	4.3543	4.32116	4.09884	3.71899	3.6068	3.5273	4.57497	4.6283	4.69389	4.87181	4.56882	4.90392	4.50573	4.27792	4.50334
ENSMUSG00000036109	Mbnl3	3.30945	3.3486	3.23991	2.73215	1.94117	2.83457	3.54097	3.59046	3.66388	3.84997	3.73662	3.78031	3.40867	3.4825	3.28735	3.45458	3.1095	3.35268	4.22266	4.35454	4.07006	3.28732	3.324	3.61117	4.3351	4.21465	4.10288	4.29944	4.19439	4.28915	4.37972	4.26171	4.00743	3.35652	3.64681	3.30143	3.48242	3.46892	3.50522	4.22443	3.99405	4.07438	3.05438	3.04158	2.53675	4.18533	4.00327	3.97453
ENSMUSG00000036114	Rpp25l	6.10853	6.01855	6.13708	6.16791	6.53643	6.229	6.11524	5.87818	5.66843	6.06292	5.92308	5.9016	5.91227	5.86015	5.88578	6.13006	6.0325	6.1058	6.00754	5.67283	5.92871	6.51959	6.83811	6.56436	5.98618	5.89502	5.8913	6.22005	6.31579	6.30983	6.0633	6.04214	5.97149	6.51129	6.34518	6.51659	6.31871	6.31456	6.25429	5.45174	5.61079	5.59652	5.62768	5.91821	5.77953	5.5731	5.51116	5.42598
ENSMUSG00000036249	Rbm43	2.90456	3.00701	2.89571	3.00693	2.96094	3.0976	3.05524	2.94402	3.26567	2.98437	2.87483	3.06453	3.70713	3.71573	3.7808	3.0803	3.14877	3.12503	3.61605	3.5918	3.51249	3.68952	3.70594	3.5656	3.26052	2.97849	3.23394	3.19269	3.19214	3.22972	3.80915	3.88206	3.85091	3.13381	3.06604	3.09176	3.09785	3.0393	2.93444	3.71181	3.70541	3.70603	3.5093	3.55025	3.56263	3.63278	3.54397	3.53131
ENSMUSG00000036698	Ago2	5.37663	5.49263	5.38635	5.40366	4.27154	5.32024	5.3984	5.52864	5.42024	5.32951	5.38455	5.2437	5.37442	5.44187	5.4234	5.3065	5.39003	5.25202	5.46846	5.58331	5.36594	4.86996	4.80691	4.7031	5.33878	5.47538	5.2544	5.07811	5.02486	4.95257	5.27022	5.29069	5.17913	4.439	5.07144	4.58193	4.99722	5.11855	5.03073	4.91493	4.85605	4.70738	4.55859	4.41969	4.25141	4.71073	4.63363	4.67986
ENSMUSG00000036781	Rps27l	8.15725	8.32241	8.28722	8.60483	9.17845	8.74271	8.35389	8.43259	8.53715	8.65274	8.80708	8.71213	8.11694	8.26765	8.14021	8.62927	8.76219	8.97371	8.26281	8.07425	8.31097	8.15712	8.35408	8.08751	8.24566	8.34058	8.33528	8.25983	8.14197	8.39349	8.2681	8.24225	8.36626	8.3521	8.11305	8.39688	8.39401	8.32647	8.19782	7.67458	7.75512	7.65782	7.41007	7.55282	7.52622	7.84661	7.74788	7.6899
ENSMUSG00000036850	Mrpl41	6.7243	6.81025	6.77107	7.03088	7.45757	7.12521	6.6206	6.66534	6.53868	7.04095	7.07317	6.93483	6.49276	6.47862	6.56282	6.9325	6.90756	7.19134	6.26303	6.14796	6.16256	6.4409	6.70779	6.60517	6.39977	6.27663	6.41669	6.68198	6.65974	6.7486	6.43701	6.34732	6.52201	6.75584	6.58169	7.01696	6.63933	6.52961	6.4438	6.72431	6.73472	6.67282	6.66047	6.71679	6.76998	6.78296	6.83688	6.67254
ENSMUSG00000036867	Smad6	4.40953	4.20761	4.33792	3.30667	3.10535	3.18727	4.52147	4.46506	4.22598	3.85208	3.70698	3.84659	4.23433	4.23614	4.37352	3.4612	3.53539	3.3369	4.40363	4.56767	4.62641	4.37478	4.45124	4.25718	4.22441	4.53684	4.38981	4.31633	4.24557	4.27905	4.31649	4.34659	4.3622	4.48496	4.32085	4.41206	4.58717	4.60734	4.60845	4.32726	4.53615	4.1777	4.75613	4.92616	4.6167	4.1228	4.08762	4.41034
ENSMUSG00000036941	Elac1	2.44976	2.44473	2.34295	2.75502	2.49288	2.80418	2.44904	2.44523	2.55851	2.67764	2.66215	2.67355	2.6358	2.69632	2.55051	2.96483	2.8276	2.84784	2.63991	2.62218	2.6288	2.94899	2.81272	2.74598	2.65	2.59343	2.53077	2.77029	2.68909	2.6919	2.77512	2.69127	2.66266	2.78402	2.82148	2.61886	2.32719	2.3177	2.19362	2.76474	2.7477	2.80024	3.3811	3.31485	3.26637	2.87465	2.95493	2.84049
ENSMUSG00000036983	Tfb1m	4.6316	4.83548	4.68745	4.51605	4.549	4.53758	4.75656	4.80567	4.88167	4.63064	4.56326	4.52126	4.76117	4.79327	4.68371	4.5282	4.50415	4.53206	4.47415	4.57544	4.52371	3.95607	4.06425	4.0027	4.60483	4.52444	4.54326	4.31179	4.23593	4.27291	4.53863	4.59183	4.55115	4.12799	3.87104	4.0077	4.46729	4.50919	4.36227	4.52072	4.42901	4.35638	3.86689	3.8178	3.885	4.35889	4.62786	4.42178
ENSMUSG00000037085	Trmt12	2.83628	2.69761	2.72865	2.53144	2.91832	2.51697	2.82578	2.7916	2.73376	2.65015	2.68139	2.66109	2.66007	2.75651	2.74995	2.71572	2.6246	2.51305	2.56335	2.53778	2.57331	2.72198	2.78454	2.65278	2.59908	2.64539	2.58624	2.75745	2.56594	2.77678	2.66435	2.6892	2.68869	2.73168	2.74983	2.74094	2.89136	2.92149	2.84119	2.22246	2.1713	2.0941	2.21776	2.12165	2.25517	2.3334	2.25313	2.14752
ENSMUSG00000037111	Setd7	5.17795	5.21684	5.24945	4.74601	4.08775	4.80324	4.96354	5.05146	5.0654	4.5638	4.6938	4.6589	4.94722	5.00236	5.10301	4.45797	4.46501	4.52873	4.8891	4.8433	4.81438	4.59797	4.47375	4.37363	4.74951	4.73917	4.70616	4.57824	4.45603	4.46135	4.82455	4.76072	4.7705	4.22511	4.42263	4.18365	4.98275	5.00144	4.95697	4.50782	4.40533	4.28726	4.53158	4.42114	4.2739	4.52639	4.43469	4.35497
ENSMUSG00000037138	Aff3	3.05391	3.11076	2.97988	4.59526	4.04965	4.44932	2.01947	1.92822	1.81829	3.68291	3.67526	3.57154	2.03081	2.18496	2.27641	4.1823	4.23291	4.07758	1.58642	1.54055	1.48898	4.96975	4.94163	4.84033	1.52968	1.74974	1.57496	4.54266	4.37439	4.35519	2.03987	2.14119	2.02136	5.01958	5.31413	5.00937	4.37355	4.31873	4.18149	1.76806	2.08358	1.99822	5.42173	5.41459	5.55331	1.97259	1.92697	1.89191
ENSMUSG00000037149	Ddx1	7.16308	7.28921	7.20978	7.55032	7.76046	7.66414	7.2727	7.31261	7.42725	7.6206	7.73254	7.62987	7.14465	7.25832	7.12073	7.59038	7.64324	7.77514	7.05956	7.01242	7.04609	7.13067	7.16983	7.15783	7.0744	6.98635	7.16107	7.20566	7.15612	7.14894	7.0429	7.10027	7.18278	7.23732	7.17064	7.23638	7.07332	7.04801	6.96796	6.69705	6.66678	6.62663	6.69541	6.66671	6.69623	6.76147	6.82232	6.5553
ENSMUSG00000037262	Kin	5.18716	5.34196	5.26183	5.13336	5.73443	5.30527	5.11517	5.10824	5.20938	5.38578	5.61654	5.50042	5.24038	5.25039	5.18243	5.61212	5.45504	5.48691	4.40494	4.55989	4.61052	4.71247	4.72812	4.47959	4.48794	4.57046	4.6546	4.80002	4.59741	4.80148	4.60607	4.59078	4.72407	4.85266	4.73088	4.77515	4.81948	4.83638	4.78647	4.4763	4.51814	4.48626	4.4016	4.49343	4.52082	4.44783	4.34571	4.33912
ENSMUSG00000037275	Gemin5	4.98462	5.05836	4.9004	5.41567	4.89986	5.29991	5.07423	5.01932	4.87841	5.19234	5.22019	5.08128	4.82702	4.93448	4.75918	5.31039	5.32172	5.23254	4.80541	4.83516	4.82681	4.85011	4.89519	4.83954	4.91667	4.92801	4.83515	4.85529	4.7421	4.84836	4.84058	4.88741	4.82148	4.67149	4.84618	4.75484	4.7687	4.83308	4.77521	4.35742	4.56229	4.63966	4.41831	4.52799	4.60876	4.48085	4.51357	4.66919
ENSMUSG00000037376	Trmt6	5.43324	5.66776	5.55967	5.70975	5.72925	5.79544	5.45592	5.62984	5.63745	5.55442	5.72794	5.68729	5.53602	5.50216	5.42441	5.73851	5.76748	5.85449	5.62364	5.50887	5.59581	5.13947	5.21126	5.19898	5.52734	5.43897	5.54813	5.23297	5.09547	5.249	5.60705	5.56053	5.68429	5.27319	5.12595	5.21492	5.3753	5.3152	5.39098	5.56856	5.44207	5.47229	4.91578	4.97797	4.79416	5.3813	5.34535	5.32012
ENSMUSG00000037531	Mrpl47	5.0794	5.38891	5.31514	5.62878	6.17724	5.83582	5.20204	5.3006	5.29878	5.65666	5.61737	5.51071	4.91456	4.97019	4.88045	5.8575	5.67043	5.84214	4.96028	4.64792	4.88412	5.1069	5.24173	5.24018	5.11851	4.94613	5.10323	5.34425	5.16408	5.27414	4.96969	5.02103	4.98911	5.28562	5.11852	5.33099	5.30606	5.24301	5.06027	4.62868	4.43107	4.31555	4.37066	4.64656	4.58667	4.77281	4.85762	4.60667
ENSMUSG00000037563	Rps16	6.90374	6.71539	6.67325	6.79709	7.0202	6.52252	6.92793	6.99202	6.63933	6.83393	7.0215	6.85301	6.89211	6.76605	6.82858	6.73489	6.73978	6.44303	7.11087	6.81124	7.29627	6.79613	7.22018	6.79955	7.25646	7.21958	7.61282	7.15614	7.04083	7.07889	7.37047	7.22898	7.11636	7.03781	6.88799	7.15373	7.11167	7.23634	7.20753	6.77236	7.08004	7.2074	6.14999	6.37011	6.15852	6.95343	6.80653	7.04576
ENSMUSG00000037772	Mrpl23	2.33533	2.36228	2.16339	2.06921	1.78098	2.27288	2.56191	2.55012	2.06678	1.87532	2.27723	2.08789	2.42041	1.97183	1.81751	2.41092	2.16699	2.13698	2.39721	2.38297	2.64864	2.48751	2.47207	2.39937	2.59273	2.82624	2.71274	2.7799	2.21968	2.31838	2.75823	2.59234	2.57145	2.91454	2.71508	2.66624	2.47656	2.12944	2.16905	2.83315	2.91483	3.12655	2.60445	2.71076	2.61078	2.99802	2.68038	3.10899
ENSMUSG00000037784	Dzip1l	4.44733	4.36411	4.38714	4.4487	3.64319	4.2297	5.06297	4.87743	4.88692	4.06812	4.20692	4.27738	4.59594	4.62889	4.7644	4.50417	3.98532	3.9727	5.33801	5.31517	5.40529	4.52369	4.62318	4.23823	5.12237	5.12201	5.1575	4.37744	4.2245	4.36558	5.24893	5.27306	5.22726	4.70008	4.56619	4.4688	4.46091	4.46553	4.19845	5.13926	5.05856	5.08854	4.61615	4.63726	4.42358	4.95399	4.94207	4.93213
ENSMUSG00000037965	Zc3h7a	5.35674	5.63944	5.48263	5.49402	5.60337	5.51488	4.98365	4.98892	5.26894	5.7921	5.71947	5.87624	5.04078	5.15643	5.17599	5.97719	5.85441	5.87939	4.89751	4.93699	4.99836	5.58668	5.36032	5.33932	5.02884	5.13534	5.01398	5.44453	5.46424	5.37468	5.07611	5.11929	5.09611	5.89241	5.78197	5.45241	5.30787	5.21761	5.12501	5.76286	5.60865	5.76834	6.09407	5.88383	5.97624	5.84939	5.67401	5.85018
ENSMUSG00000038132	Rbm24	3.71953	3.66438	3.80008	0.250097	0.430581	0.414323	1.32174	1.25598	1.14322	0.680965	0.877154	0.888814	1.08852	1.0382	0.96106	1.04381	0.928445	0.773577	0.906791	1.03365	0.984707	0.400991	0.330309	0.310944	0.563995	0.657229	0.680093	2.79189	2.39398	2.15485	0.441846	0.478512	0.62955	0.515142	0.361232	0.36049	4.76108	4.69023	4.51879	0.467975	0.483675	0.390315	0.669259	1.01525	0.749513	0.28568	0.421616	0.357606
ENSMUSG00000038305	Spats2l	3.63051	3.52212	3.45786	2.79987	2.13785	2.89384	5.25598	5.33609	5.32023	3.63275	3.28986	3.32292	5.02797	5.1646	5.07169	2.62668	2.9207	3.67422	5.40252	5.38801	5.40132	4.35176	3.97024	3.66435	5.64443	5.69559	5.67219	5.56374	4.97952	5.09999	5.57395	5.48289	5.54329	5.02302	4.85176	4.83439	4.02156	3.95151	3.79844	5.49402	5.50251	5.61388	5.47249	5.64867	5.62427	5.50589	5.69686	5.65506
ENSMUSG00000038335	Tsr1	5.74407	5.8311	5.81131	6.17239	5.94649	6.03012	5.84441	5.95124	5.96026	5.73999	6.06966	5.94761	5.6773	5.76809	5.7045	6.18379	6.07891	6.04617	5.58168	5.63654	5.68145	5.26206	5.23232	5.0884	5.75677	5.64169	5.68127	5.33004	5.17604	5.4114	5.61	5.65389	5.69967	5.28622	5.29756	5.30336	5.59339	5.51702	5.54332	5.40872	5.37494	5.23847	4.95282	4.83661	4.6525	5.52686	5.50278	5.26932
ENSMUSG00000038489	Polr2l	4.6116	4.6031	4.45387	4.40798	4.59259	4.28984	4.74472	4.53016	3.92242	4.46072	4.36306	4.2794	3.97888	4.14078	4.24596	4.10168	4.2269	4.51095	4.55177	4.29586	4.45388	4.17779	4.31958	4.07751	4.24141	4.23679	4.36439	4.11786	4.14129	4.01005	4.43506	4.45442	4.28841	4.2648	4.05856	4.0283	4.56717	4.49194	4.37798	3.88311	4.06125	4.07503	3.41711	3.5869	3.54541	3.86704	3.9174	3.94303
ENSMUSG00000038507	Parp12	1.03655	1.06737	0.968333	0.756582	0.550639	0.632304	0.276662	0.313471	0.240881	0.569893	0.528525	0.712686	0.606328	0.410921	0.464498	0.428194	0.763915	0.663566	1.21868	1.12265	0.949546	1.72997	1.47689	1.38655	0.978846	1.06316	0.907211	1.57294	1.37687	1.34442	0.998783	0.947132	0.919311	1.35538	1.32476	1.35433	2.31692	2.14849	1.96011	1.18422	1.26038	1.09955	2.34718	2.44823	2.30911	1.2903	1.20328	1.03881
ENSMUSG00000038510	Rpf2	6.29382	6.44575	6.28053	6.83328	7.39058	6.95105	6.37638	6.48753	6.71905	6.81354	7.05755	6.96192	6.25243	6.4453	6.28449	6.92029	7.11013	7.11706	5.98406	5.85967	5.88281	5.83779	5.77154	5.83545	5.96691	6.01684	6.02206	5.98474	5.83967	5.94339	5.86672	5.84829	5.93363	5.84935	5.79847	5.93048	5.98064	5.90664	5.93852	6.13478	6.11351	6.02796	5.93537	6.01984	6.00454	6.13576	6.13245	6.14519
ENSMUSG00000038650	Rnh1	6.17978	6.05597	6.02394	5.07048	5.15883	4.96338	6.27332	5.95189	5.78956	5.21828	4.94203	5.10162	5.92914	5.85814	5.91862	5.2661	4.82063	4.65866	6.91265	6.79068	6.99227	5.73976	5.88721	5.73267	6.90195	6.80336	6.81463	5.77488	5.79242	5.86689	6.76673	6.73666	6.67525	5.7344	5.56108	5.70159	7.06224	7.02991	6.96919	6.28706	6.28869	6.38882	5.04577	5.30977	5.15709	6.48648	6.47718	6.47021
ENSMUSG00000038888	Ctu1	3.40207	3.37221	3.39535	3.42686	3.54587	3.33183	3.39726	3.38772	3.32591	3.36733	3.34436	3.49779	3.42398	3.4341	3.50219	3.5402	3.55433	3.28557	3.88108	3.83008	4.01416	3.60508	3.57929	3.44675	3.93831	4.01226	3.94739	3.70804	3.46657	3.66698	4.13369	4.07842	4.0175	3.88325	3.69156	3.79449	3.80398	3.79411	3.72232	3.89676	3.93938	4.06775	3.1616	3.42434	3.19721	3.71621	3.79982	4.00594
ENSMUSG00000039001	Rps21	9.72397	9.49887	9.21813	9.49725	9.54355	9.62719	9.63267	9.40762	9.31142	9.76946	10.272	9.71109	9.09818	9.32598	9.21188	9.78978	9.66375	10.1201	9.47758	9.23044	9.53865	9.34827	9.68696	9.21185	9.66618	9.69368	9.85424	9.59095	9.35908	9.50801	9.68978	9.56773	9.87284	9.54115	9.19581	9.5609	9.66414	9.66183	9.53165	9.07174	9.5047	9.48703	8.57309	9.13092	8.91417	9.40582	9.32104	9.36193
ENSMUSG00000039130	Zc3hc1	5.8418	5.81272	5.69635	6.12126	6.40712	6.09096	6.05419	5.60704	5.55377	6.43947	6.24965	6.15382	5.59931	5.59373	5.7818	6.41993	6.0585	6.17957	5.4933	5.37127	5.52386	6.00095	6.21505	6.11589	5.56195	5.60486	5.55288	6.1465	6.09461	6.13071	5.58929	5.59888	5.61176	6.20034	6.15909	6.22452	5.48045	5.59789	5.54939	5.14756	5.09879	5.30632	5.57577	5.71292	5.88321	5.30522	5.31941	5.37617
ENSMUSG00000039209	Rpl39l	0.377853	0.105417	0.143272	0.116238	1.26064	0.831645	0.455523	0	0.216238	0.0624489	0.489699	0.384423	0.239393	0.262929	0.104456	0	0.523586	0.784905	0.0555598	0.176094	0.120365	0.871043	0.993779	0.661609	0.304213	0.119834	0.289168	0.623974	0.402954	0.644067	0.0840562	0.119641	0.281071	1.33528	0.709277	0.857903	0.106036	0.156285	0.183424	0.45148	0.153715	0.541371	2.04473	2.26052	2.25378	0.263685	0.0534389	0.940592
ENSMUSG00000039356	Exosc2	6.45585	6.45458	6.49006	6.64852	6.82468	6.74646	6.74664	6.68309	6.69622	6.66888	6.85977	6.75144	6.45225	6.59929	6.49902	6.8245	6.74125	6.86566	6.46271	6.45238	6.58662	6.38207	6.5113	6.34622	6.52549	6.39433	6.53188	6.46584	6.35679	6.56209	6.59316	6.50622	6.67159	6.55242	6.47145	6.65628	6.30433	6.28159	6.21158	6.25504	6.19248	6.24299	6.13909	6.08915	6.12238	6.50229	6.33943	6.22131
ENSMUSG00000039607	Rbms3	1.8914	1.86012	1.79168	3.48789	2.80583	3.37212	3.3248	3.61462	3.48905	3.46344	3.74033	3.46873	3.16523	3.09574	3.23916	3.52601	3.4977	3.69621	3.59525	3.48979	3.16015	4.77205	4.6446	4.41835	4.03853	4.10356	3.99096	4.69283	4.51891	4.39078	4.03782	4.03318	3.85418	4.73389	4.75962	4.5075	3.13682	3.12312	2.90683	4.17819	4.22032	4.295	5.40467	5.25213	5.20553	4.10867	4.20331	4.14311
ENSMUSG00000039640	Mrpl12	7.70213	7.61869	7.60504	7.86147	8.09578	7.84017	7.73528	7.57962	7.38962	7.94486	7.74564	7.66438	7.36701	7.27146	7.38421	7.98358	7.7623	7.86465	7.29435	7.14659	7.42762	7.03034	7.46266	7.28529	7.48057	7.38232	7.30149	7.24155	7.2025	7.45879	7.47111	7.41614	7.47379	7.23418	7.01506	7.57343	7.45192	7.40566	7.35342	7.31353	7.24852	7.06869	6.50601	6.66945	6.47873	7.37765	7.27463	7.23573
ENSMUSG00000039652	Cpeb3	1.32335	1.53841	1.39472	0.860372	0.499485	0.810937	0.750419	0.907305	0.717176	0.440557	0.571724	0.771291	0.746929	0.950833	1.05027	0.262897	1.01314	0.75315	0.597569	0.797171	0.566291	0.668882	0.914011	0.703331	0.658944	0.609171	0.614715	0.67114	0.608275	0.667275	0.596451	0.623015	0.510833	0.654205	1.12054	0.677791	1.21504	1.29961	1.09495	0.626648	0.780797	0.608861	0.759305	1.11105	0.797841	0.784993	0.707438	0.685314
ENSMUSG00000039717	Ralyl	1.21207	1.83765	1.51031	0.101097	0.316271	0.436803	0.294784	0.410476	0.329346	0.757513	0.702409	0.648348	0.484293	0.979872	0.667384	0.29928	0.518122	0.463783	0.897312	0.962057	1.35332	0.593055	0.732808	0.6607	0.779426	0.666164	0.349347	0.333218	0.192147	0.310038	0.279849	0.776214	0.197791	0.818212	0.30677	0.358047	2.66	2.47147	2.30464	1.28086	1.29932	1.18188	0.803568	0.629372	0.627165	1.06539	1.28029	1.14078
ENSMUSG00000039748	Exo1	6.27867	6.44211	6.54427	6.76519	7.07782	6.7775	6.21176	6.27441	6.55177	6.85823	6.63016	6.8622	6.17962	6.15294	6.07915	7.09288	6.7665	6.86142	5.95489	5.74829	5.79425	6.39728	6.50475	6.28601	6.13386	6.17385	5.86507	6.47629	6.29489	6.51021	6.1832	5.98928	5.97544	6.61512	6.56856	6.49147	6.38165	6.42022	6.20001	5.53009	5.47222	5.32515	5.185	5.50573	5.21329	5.68376	5.70086	5.41292
ENSMUSG00000039756	Dnttip2	6.64603	6.8024	6.79682	7.16958	7.18932	7.25798	6.63638	6.81917	7.04022	7.08289	7.13692	7.1994	6.69827	6.7564	6.72037	7.20289	7.26526	7.43371	6.3525	6.24553	6.36995	6.50145	6.39434	6.40784	6.50333	6.31479	6.46512	6.46207	6.30073	6.52215	6.37482	6.31218	6.47382	6.51192	6.38182	6.53197	6.47605	6.42433	6.31082	6.46974	6.28535	6.19478	6.39672	6.24671	6.21679	6.45807	6.50896	6.26273
ENSMUSG00000039782	Cpeb2	1.72456	1.95998	1.75834	0.67815	0.779916	0.890525	1.57385	1.24818	1.41212	0.630383	0.554651	0.635459	1.35425	1.37091	1.26662	0.614708	0.832895	0.658714	3.50727	3.54243	3.42772	0.819743	0.729548	0.614106	2.33921	2.4504	2.47935	0.958034	0.886577	0.833915	2.562	2.58764	2.37742	0.938774	0.686519	0.764305	2.0005	1.9211	1.9034	3.49288	3.42981	3.56256	0.947077	0.947668	1.03436	2.51379	2.36731	2.71019
ENSMUSG00000039860	Srrm3	0.947428	1.11083	1.04869	0.248383	0.43543	0.522662	0.0762876	0.028793	0.16528	0.111115	0.0602519	0.129588	0.0601213	0.119771	0.0533481	0.0394436	0.307406	0.122637	0.0986285	0.152	0.105725	0.263905	0.231988	0.358822	0.0988293	0.0696459	0.130202	0.245522	0.302435	0.186686	0.0330552	0.163854	0.107276	0.323877	0.283694	0.382806	1.85913	1.68419	1.4456	0.0360851	0.0624642	0.0659612	0.911115	0.798975	0.767605	0.0766372	0.00918975	0.0622209
ENSMUSG00000040029	Ipo8	5.38106	5.45435	5.30767	5.20562	4.42197	5.16919	5.27508	5.12838	5.16451	5.08787	5.11234	5.0372	4.94892	5.00073	4.94655	4.94352	5.1546	5.46017	4.90357	4.76644	4.63888	4.86087	4.72156	4.66084	4.81672	4.84783	4.77704	4.66386	4.59942	4.67403	4.81901	4.8508	4.72227	4.74298	4.82001	4.69533	4.91221	4.97635	4.8696	4.46034	4.40592	4.43033	4.35543	4.45138	4.2132	4.52118	4.42959	4.44353
ENSMUSG00000040054	Baz2a	5.2885	5.32999	5.20356	4.79162	3.77933	4.71842	5.21562	5.23785	5.10025	4.54424	4.68019	4.46367	5.19603	5.25321	5.24395	4.78899	4.69297	4.65706	4.89811	4.92369	4.86146	4.05772	3.93168	3.78239	5.01584	4.96908	4.89908	3.85987	3.63531	3.77003	4.90606	4.85757	4.89128	3.84526	4.03706	3.74479	5.07239	5.08962	4.97334	4.7722	4.77583	4.86959	3.83313	3.74914	3.76709	4.79997	4.68744	4.8271
ENSMUSG00000040269	Mrps28	6.19713	5.88315	5.92829	5.42119	6.0076	5.53149	6.03692	5.92798	5.78157	5.70036	5.66273	5.56161	5.68717	5.79985	5.60154	5.71627	5.49118	5.52378	5.54815	5.54182	5.76936	5.21364	5.35021	5.22677	5.58107	5.50096	5.6703	5.27424	5.12407	5.34581	5.50767	5.58517	5.7268	5.22427	5.11891	5.37464	5.88135	5.87713	5.8134	5.45376	5.57572	5.43361	4.86918	5.16542	5.02993	5.44073	5.31259	5.44804
ENSMUSG00000040296	Ddx58	3.11479	3.21479	3.05367	1.54947	1.18092	1.30122	3.91492	3.9511	3.90901	1.26157	1.11096	1.17481	4.25905	4.2961	4.15773	1.58851	1.45695	1.32896	4.03679	4.01437	4.14374	1.81226	1.62855	1.59231	3.90102	4.025	4.06803	1.40575	1.47446	1.36777	3.62979	3.75235	3.74629	1.55334	1.60116	1.60961	3.52876	3.51826	3.45689	3.92279	3.7128	3.85297	2.13728	2.15578	2.25048	3.39576	3.35475	3.54613
ENSMUSG00000040423	Rc3h1	3.97015	3.91681	3.90697	3.96206	3.12814	3.95978	3.91699	3.75526	3.75598	3.79481	3.89025	3.80593	3.8325	3.80733	3.91021	3.79921	3.83476	4.06527	4.16266	4.30955	4.12029	3.84618	3.70396	3.6044	3.91513	4.00243	3.98397	3.81875	3.65545	3.72206	3.97748	4.0889	4.01436	3.67509	3.95796	3.74084	3.86371	3.81196	3.65866	3.49406	3.38084	3.3709	3.234	2.98878	3.00233	3.25242	3.04521	3.11392
ENSMUSG00000040464	Gtpbp10	4.28603	4.38979	4.30104	4.41322	4.64472	4.53144	4.31688	4.55712	4.65694	4.45046	4.65596	4.49326	4.45266	4.40298	4.38973	4.62467	4.89125	4.96113	4.54937	4.59092	4.65172	4.1594	4.20776	4.25304	4.52452	4.56993	4.73262	4.20572	4.32115	4.31853	4.56758	4.67586	4.64455	4.33017	4.32799	4.35304	4.34748	4.30706	4.35197	4.57923	4.37662	4.52702	3.87637	3.86723	3.85541	4.47742	4.2257	4.40347
ENSMUSG00000040594	Ranbp17	2.3415	2.54279	2.48761	2.25143	1.90722	2.26986	2.96715	2.88719	3.16952	2.20563	2.12312	2.24672	2.7477	2.79904	2.87038	2.61923	2.36922	2.3127	3.34572	3.19535	3.48387	1.93038	2.03923	1.85441	3.14442	3.14358	3.31769	2.2141	2.11594	2.28058	3.06217	2.96703	2.99056	2.15655	2.25189	2.14281	2.23184	2.29373	2.26025	2.53638	2.37763	2.46383	1.53576	1.55952	1.44765	2.58365	2.727	2.60688
ENSMUSG00000040613	Apobec1	0.878838	0.562922	0.911787	1.04726	0.57329	0.743206	1.76291	1.67482	1.61553	0.453144	0.7102	0.984651	2.1603	2.61549	2.02307	0.730591	1.43334	1.4991	1.2363	1.2886	1.27202	1.47963	1.05263	0.65771	0.828253	1.25073	1.17846	1.48368	0.961919	1.12092	1.22688	1.35174	1.54192	0.856339	0.594204	0.457769	1.22207	1.06333	0.737588	0.489644	0.615688	0.668383	0.840689	0.730137	0.8814	0.63288	1.0222	0.839522
ENSMUSG00000040620	Dhx33	5.2676	5.32591	5.00403	5.50885	5.03701	5.55233	5.33516	5.1436	4.94114	5.71821	5.43863	5.37709	4.91799	5.01576	5.23865	6.11991	5.60748	5.64775	4.73536	4.86169	4.81249	4.88357	4.70218	4.85907	4.87486	4.85193	4.72303	4.91253	4.90436	4.90215	4.74083	4.82567	4.75946	4.82276	4.8799	4.70506	4.78755	4.75734	4.6704	4.64077	4.69375	4.59248	4.81706	4.79959	4.64063	4.5414	4.57404	4.54802
ENSMUSG00000040688	Tbl3	6.0238	6.0497	5.89596	6.25337	6.44143	6.1271	6.20335	5.83432	5.717	6.31223	6.2938	6.11393	5.66747	5.81832	5.64206	6.24611	6.20232	6.181	5.6401	5.64418	5.78033	5.80364	5.92269	5.86998	5.6545	5.57227	5.71583	5.8607	5.80772	5.95096	5.68197	5.75371	5.84579	5.89791	5.91542	6.03829	5.80201	5.82596	5.77787	5.2279	5.28341	5.51568	5.10007	5.23249	5.43232	5.42884	5.28328	5.46898
ENSMUSG00000040694	Apobec2	0	0	0	0.26239	0.166668	0.105654	0	0	0	0.237588	0.106828	0.0626029	0.115797	0.0328836	0.175706	0	0.51746	0.315582	0.032653	0.105714	0.0697972	0.128613	0.133255	0.195763	0.0928795	0.0691655	0.0369762	1.30918	1.09261	0.74844	0.0571644	0.0704598	0.135986	0.226971	0.269227	0.0680812	0	0	0.029539	0	0.0607237	0	0.114534	0.125024	0.173415	0	0.0307859	0.0353593
ENSMUSG00000040728	Esrp1	6.81016	6.82694	6.76832	0.549041	0.27838	0.609558	6.99725	6.98213	6.9087	0.190458	0.354579	0.295848	6.83568	6.84964	6.87789	0.600485	0.846472	0.141981	7.2717	7.24897	7.25295	0.266195	0.151004	0.38995	7.36566	7.31081	7.32211	0.121777	0.12862	0.244749	7.20562	7.17875	7.18232	0.225543	0.140814	0.146567	6.94654	6.9219	6.92342	6.97041	7.0043	7.09676	1.30591	1.63833	1.10152	7.04614	7.21128	7.19181
ENSMUSG00000040738	Ints8	5.78502	5.89095	5.79562	6.28907	6.27645	6.41005	5.81545	5.88709	6.0429	6.28403	6.40249	6.27874	5.66132	5.77204	5.71358	6.32834	6.34376	6.54602	5.62709	5.6074	5.60853	6.19471	6.1567	6.0318	5.74871	5.71415	5.77129	5.98082	5.91303	5.91108	5.65617	5.69187	5.74854	6.16172	6.09373	6.10698	5.67785	5.66967	5.55022	5.19422	5.26847	5.25083	5.78937	5.78398	5.69096	5.45079	5.51589	5.31918
ENSMUSG00000040824	Snrpd2	8.64169	8.82056	8.82886	9.03005	9.64651	9.12942	8.65871	8.76857	8.68545	9.09785	8.84337	8.95704	8.67904	8.57957	8.64902	8.9486	9.01383	8.99241	8.78866	8.57699	8.83439	8.72772	9.10542	8.92581	8.85817	8.67702	8.88869	8.97883	8.88107	9.0822	8.89351	8.88154	8.92648	8.99518	8.81944	9.21867	8.96044	8.96516	8.87515	8.46905	8.4694	8.53627	8.10137	8.31595	8.24102	8.68626	8.59311	8.4978
ENSMUSG00000040952	Rps19	9.82465	9.63227	9.69519	9.62707	10.5305	9.80047	9.99739	9.69584	9.77952	9.82739	9.70208	9.69549	9.70253	9.85437	9.70444	10.3694	9.87732	9.93524	10.1312	9.84816	10.3471	9.90267	10.2019	9.92052	10.5082	10.4431	10.5444	10.3204	10.0779	10.4175	10.4604	10.2182	10.4402	10.1479	9.84123	10.2253	10.378	10.4266	10.5016	9.78103	9.90223	9.85481	9.08449	9.31366	9.32188	10.0131	9.98279	9.93373
ENSMUSG00000041057	Wdr43	6.22759	6.40731	6.29291	6.66374	6.69322	6.79007	6.35301	6.50279	6.57747	6.60759	6.70794	6.67621	6.26519	6.34285	6.2814	6.71922	6.76607	6.81601	6.06774	5.95376	6.03481	5.84557	5.78142	5.69791	6.35331	6.21291	6.23893	6.00773	5.81082	5.99854	6.14736	6.09515	6.22792	5.86665	5.74566	5.7443	6.07844	6.02589	5.90391	6.00816	5.97454	5.88408	5.69798	5.76911	5.5613	6.1946	6.20815	6.10695
ENSMUSG00000041477	Dcp1b	3.42268	3.7256	3.44485	3.06785	3.03869	3.0837	3.57779	3.57396	3.32338	3.11376	2.87724	3.03188	3.41178	3.37994	3.60135	2.26106	2.79221	2.87216	3.62932	3.65471	3.70552	3.24259	3.30457	3.11315	3.89191	3.8624	3.58378	3.19765	3.18793	3.28548	3.77442	3.89225	3.67093	3.45088	3.3307	3.32194	3.66954	3.75841	3.7015	3.80224	3.87106	3.78283	3.48285	3.39896	3.50956	3.80888	3.80771	3.97479
ENSMUSG00000041506	Rrp9	5.68008	5.96244	5.8218	6.12897	6.14263	6.17635	5.65163	6.10633	6.08679	6.23756	6.00994	6.17751	5.63166	5.67149	5.65031	6.57792	6.40342	6.206	5.23526	5.12666	5.4612	5.28595	5.41949	5.18781	5.45805	5.389	5.30463	5.52807	5.31424	5.54217	5.42483	5.3791	5.35363	5.47299	5.31018	5.46659	5.55768	5.48683	5.41976	5.1965	5.24705	5.16423	5.14282	4.99665	5.01521	5.28178	5.16692	5.32192
ENSMUSG00000041530	Ago1	6.48022	6.55615	6.52495	5.01405	4.15627	5.05481	6.14421	6.21446	6.10256	4.86409	4.94027	4.78117	6.14653	6.15674	6.23617	4.80571	4.91766	4.8208	6.28159	6.24713	6.13212	5.12478	5.04484	4.97594	6.44983	6.42534	6.38058	4.97063	4.93635	4.91764	6.40279	6.40236	6.33468	5.08105	5.20437	4.98378	6.89666	6.86181	6.80981	6.11614	6.0899	6.08233	5.02458	4.98885	4.83849	6.12797	6.18607	6.08648
ENSMUSG00000041841	Rpl37	6.90967	7.04318	6.82723	7.12587	7.46026	7.30147	7.10465	7.19098	7.10058	7.4793	7.77841	7.32405	6.94723	7.22796	7.06997	6.98723	7.39138	7.70457	7.65952	7.52045	7.81652	7.55353	7.73007	7.49228	7.96347	7.95885	8.01627	7.75191	7.50607	7.70282	7.94591	7.85878	8.06549	7.64851	7.33992	7.71223	7.75027	7.69638	7.64921	7.0197	7.27109	7.29158	6.35947	6.66879	6.69619	7.38011	7.27934	7.19104
ENSMUSG00000041879	Ipo9	6.82107	6.76713	6.69925	7.15822	6.7339	7.03558	6.87785	6.81851	6.69986	7.04953	7.12881	7.07613	6.81737	6.74242	6.78682	7.10752	7.04157	7.01952	6.92374	6.96357	6.94791	7.35421	7.35007	7.29421	6.78656	6.87348	6.70533	7.31925	7.20291	7.33915	6.86545	6.83716	6.89783	7.3923	7.47762	7.41555	6.61324	6.66782	6.64565	6.71973	6.58025	6.71405	7.04548	7.02441	6.87478	6.58944	6.51167	6.60947
ENSMUSG00000041912	Tdrkh	2.63078	2.55449	2.51965	1.97742	2.19327	1.82369	1.10138	1.06989	1.1265	1.74871	1.75001	1.76901	1.25642	1.23346	1.22022	1.56399	1.81643	1.91616	0.709472	0.833076	0.716095	1.46127	1.39168	1.30338	0.797184	0.652038	0.712877	1.82803	1.71734	1.78035	0.723578	0.783688	0.775877	1.55442	1.59351	1.57124	2.93187	2.94818	2.76401	0.699664	0.519048	0.600512	1.41613	1.38407	1.32316	0.613354	0.494021	0.34272
ENSMUSG00000042109	Csdc2	1.51855	1.59701	1.52589	2.03689	2.00726	1.95911	1.38046	1.14996	1.11888	2.02191	1.95874	2.0015	1.22254	1.26826	1.37435	1.89232	1.71977	1.7519	1.21022	1.32629	1.43752	2.59951	2.58276	2.33132	1.04446	1.07648	1.02904	2.40516	2.16455	2.17183	1.24433	1.30054	1.24244	2.48154	2.30915	2.28613	2.01655	1.99431	1.82628	1.089	1.03419	1.09332	2.81251	2.82762	2.91487	1.11543	1.1418	1.13385
ENSMUSG00000042156	Dzip1	4.00861	4.09506	4.00806	4.53195	4.18457	4.51856	4.77014	4.71789	4.7555	5.00199	4.85549	4.96416	4.83598	4.84349	4.89743	4.78506	4.72911	4.91889	4.63467	4.67031	4.61506	5.45357	5.34584	5.22241	4.56566	4.74462	4.66673	5.42128	5.37276	5.27252	4.7461	4.84169	4.71801	5.56942	5.50787	5.29284	3.94343	4.02163	3.93106	4.43403	4.55535	4.42864	5.75487	5.69683	5.75695	4.40806	4.4397	4.47601
ENSMUSG00000042167	Papd4	4.92764	5.28716	5.03069	5.6059	5.32082	5.816	5.35693	5.55947	5.68335	5.74706	5.80074	5.73864	5.39005	5.3688	5.43815	5.58251	5.75795	6.08556	5.53876	5.46661	5.62123	5.38965	5.36572	5.4165	5.47008	5.42823	5.6354	5.6448	5.57529	5.5246	5.48089	5.50335	5.61799	5.46816	5.41454	5.52232	5.02507	4.96916	4.95355	5.25985	5.07705	4.92378	5.26315	5.12158	4.97167	5.10573	5.07485	4.86227
ENSMUSG00000042271	Nxt2	3.86775	3.90612	3.80101	3.05797	2.79835	3.27983	3.89721	3.88025	4.13072	3.17733	3.39105	3.40549	4.04137	4.12259	3.95921	2.8043	3.26999	3.43178	4.33452	4.26343	4.21878	3.40099	3.36198	3.11669	4.18245	4.13457	4.1416	3.38528	3.29103	3.42591	4.28471	4.29301	4.28173	3.33078	3.26335	3.27426	4.05585	4.08319	3.94661	4.67115	4.49557	4.48672	3.54602	3.60927	3.53202	4.54818	4.60135	4.42337
ENSMUSG00000042354	Gnl3	6.26404	6.51366	6.46249	7.06057	7.27144	7.19722	6.4856	6.58001	6.78209	7.02215	7.03914	7.05884	6.28336	6.30385	6.2395	7.02495	7.1901	7.29056	6.18232	5.95582	6.17555	5.86699	5.7899	5.8457	6.38818	6.22746	6.43072	6.14508	6.03322	6.15928	6.2961	6.18459	6.32269	5.95227	5.8629	5.89424	6.11022	6.0153	5.99893	6.12525	6.11666	6.0938	5.47049	5.58461	5.49019	6.26873	6.17782	6.1658
ENSMUSG00000042500	Ago4	1.14529	1.10277	1.16944	1.09568	0.956303	1.47287	1.28672	1.45243	1.45277	0.897003	0.901782	0.786505	1.25285	1.34587	1.22637	0.663564	0.805652	1.01391	2.31871	2.33463	2.12439	2.03743	1.94579	1.75659	2.55076	2.53174	2.54531	1.29506	1.21793	1.23909	2.48128	2.49664	2.34236	1.90497	1.93116	1.62559	1.93687	1.96688	1.95737	2.87289	2.84177	2.88362	2.23966	2.17954	2.2514	2.78676	2.87357	2.8211
ENSMUSG00000042590	Ipo11	5.82192	6.04006	5.90375	6.15318	6.51792	6.2441	5.77816	5.80279	5.83672	6.0596	5.8695	6.08794	5.57612	5.63279	5.62992	5.88933	6.23699	6.1701	5.43338	5.48401	5.43459	5.44175	5.44396	5.5681	5.44076	5.4394	5.41891	5.42914	5.45677	5.5251	5.41758	5.49434	5.43493	5.50622	5.54606	5.54368	5.6313	5.59711	5.57954	5.12036	5.12831	5.05534	5.06649	5.10757	5.19739	5.17915	5.2274	5.21492
ENSMUSG00000042677	Zc3h12a	0.602122	0.644775	0.668452	0.767501	0.765435	1.08435	0.945286	1.00826	0.507133	1.027	0.754894	0.739446	0.789689	0.837823	1.00565	0.874378	0.678706	0.646954	1.33271	1.22651	1.25673	0.812606	0.780881	0.917823	0.997424	1.14377	1.27592	0.730258	0.618229	0.763014	1.33525	1.08952	1.12359	0.682771	0.98895	0.627765	0.411167	0.516208	0.58603	1.8306	1.80946	1.65112	0.81906	1.0453	0.894616	1.23424	1.40508	1.31064
ENSMUSG00000042851	Zc3h6	1.27686	1.34688	1.24945	0.847489	0.516168	0.898073	1.12423	1.06756	1.14284	0.793713	1.10953	0.960375	1.29902	1.44426	1.43868	0.786577	0.945199	0.587223	1.46146	1.46627	1.38936	1.34171	1.28427	1.28807	1.6586	1.68864	1.69404	1.44754	1.21157	1.32187	1.76537	1.71489	1.8425	1.32695	1.31965	1.48126	2.04356	2.01856	1.91371	2.00536	1.71469	1.88839	1.5452	1.35591	1.42216	1.95289	2.06495	2.10194
ENSMUSG00000043279	Trim56	2.95298	3.05268	2.87576	2.31138	1.77728	2.17239	2.84382	3.04214	2.77582	2.31144	2.30654	2.35272	2.82124	3.00843	3.02913	2.47589	2.27979	2.47868	2.87131	2.7723	2.54835	2.90276	2.6165	2.65935	2.88872	2.83409	2.77041	2.86571	2.5863	2.56527	2.65347	2.73657	2.64796	2.55149	2.76713	2.68587	3.10711	3.01218	2.95825	2.54545	2.64632	2.55407	2.79873	2.66014	2.58176	2.46652	2.5327	2.34592
ENSMUSG00000043372	Hexim2	2.5095	2.5942	2.70997	2.78472	2.92276	2.59253	2.59967	2.31455	2.32889	3.02988	3.18202	2.8836	2.28189	2.5465	2.53919	2.64523	2.95252	2.59745	2.29797	2.16164	2.40087	3.6532	3.79237	3.47967	2.26908	2.42064	2.52303	3.59093	3.40463	3.48886	2.45789	2.52014	2.54757	3.92693	3.43665	3.65851	2.88122	2.71256	2.74499	2.4243	2.1416	1.97598	3.69397	3.63341	3.71769	2.29224	2.54366	2.12031
ENSMUSG00000043432	Leng9	1.36957	1.29564	1.17367	0.939582	1.56137	0.975622	1.39352	1.25375	1.04801	0.928879	0.979545	0.915393	1.2318	1.40506	1.26192	0.75316	1.00906	0.816356	1.72957	1.50937	1.64145	1.55657	1.68973	1.38772	1.53092	1.55647	1.51926	1.53712	1.38931	1.45582	1.5615	1.59633	1.6472	1.66073	1.61912	1.41752	1.59925	1.77413	1.57094	1.4632	1.72345	1.64351	1.89904	1.88185	1.98709	1.46442	1.59786	1.4951
ENSMUSG00000043639	Rbm20	1.23136	1.08432	1.2846	0.365174	0.366096	0.347967	2.83067	2.9252	2.75511	0.92094	0.496067	0.509177	2.54363	2.59538	2.60943	0.583816	0.514031	0.39427	2.17778	2.36405	2.2495	0.716469	0.424915	0.451732	2.50498	2.6285	2.38291	1.58333	1.43179	1.21692	2.38473	2.19295	2.14476	0.849967	0.886538	0.920656	1.50744	1.65334	1.4805	2.21012	2.31824	2.28202	1.25	1.1664	1.34659	2.20581	2.27507	2.39746
ENSMUSG00000043648	Pld6	2.23384	2.25167	2.03744	1.44503	1.64449	1.20884	2.20443	2.37211	1.94193	1.99717	1.47576	1.59075	2.04315	1.85737	1.88767	0.601699	1.16493	1.47455	1.50856	1.51479	1.74519	1.30276	1.67844	1.46761	1.669	1.67196	1.77524	1.55587	1.74905	1.59859	1.60336	1.49558	1.55002	1.42888	1.56202	1.45503	1.92413	2.23652	2.13073	1.2363	1.16452	1.07351	1.01878	1.10344	1.12809	1.48584	1.41827	1.36406
ENSMUSG00000043716	Rpl7	11.0936	11.1725	11.02	11.1701	11.5276	11.3449	11.1548	11.0514	11.1409	11.1988	11.2047	11.2134	10.9494	11.1199	10.9634	11.4001	11.3101	11.5428	11.0424	10.9432	11.0926	10.9279	11.0102	10.8969	11.1304	11.0022	11.2923	10.9036	10.8806	10.9202	11.1395	11.1335	11.2641	10.9924	10.893	10.9446	11.1503	11.0548	11.0424	10.7241	10.6665	10.7022	10.3745	10.217	10.4731	10.7815	10.8411	10.6061
ENSMUSG00000043991	Pura	1.82908	1.8846	1.90796	1.2724	1.10356	1.12634	1.92473	2.06729	2.13784	1.29788	1.3183	1.38002	1.94661	1.98108	2.06198	1.40408	1.31127	1.43988	2.47455	2.46094	2.46747	1.8574	1.61742	1.60426	2.53367	2.52076	2.49544	1.85082	1.6804	1.72556	2.48692	2.37986	2.34042	1.70282	1.70742	1.63307	2.36166	2.36415	2.25264	2.29773	2.27414	2.25441	1.91671	1.82961	1.81442	2.31754	2.2892	2.44058
ENSMUSG00000044149	Nkrf	3.52513	3.75704	3.59614	3.75366	3.86798	3.85555	3.48843	3.6547	3.76209	3.72478	3.81633	3.68217	3.44326	3.53665	3.41588	3.76665	3.8047	3.88973	3.42402	3.56924	3.50727	3.22483	3.25053	3.22505	3.51421	3.59452	3.60248	3.19056	3.06509	3.27205	3.47396	3.55871	3.55218	3.12438	3.28378	3.1822	3.4761	3.45126	3.57714	3.19724	3.27559	3.21054	2.77089	2.83295	2.86157	3.3039	3.26935	3.34382
ENSMUSG00000044224	Dnajc21	5.75984	5.93172	5.91747	5.08418	5.62144	5.43836	4.82649	5.14158	5.35182	5.14957	5.13246	5.23197	5.08244	4.98729	5.12743	5.16529	5.23589	5.32363	5.04801	4.87427	5.02966	4.76918	4.69213	4.64843	4.90434	4.78772	4.85235	4.60714	4.51769	4.50097	4.70538	4.72529	4.77862	4.67654	4.50493	4.62783	5.62758	5.64544	5.64968	4.94928	4.79484	4.85224	4.79324	4.74507	4.85819	4.86059	4.95851	4.82187
ENSMUSG00000044533	Rps2	11.1873	11.0453	10.9137	11.242	11.2854	11.2735	11.2466	11.0444	10.882	11.2583	11.303	11.025	10.678	10.8411	10.804	11.1694	11.0912	11.3219	10.7331	10.9264	11.0863	10.5685	10.8517	10.6137	10.8063	11.1534	10.9746	10.6994	10.6651	10.7603	10.9029	10.9832	11.1319	10.7944	10.8406	11.0003	10.8906	10.9848	10.9578	10.4311	10.8718	10.4493	9.9954	10.0042	10.0074	10.7735	10.6391	10.9111
ENSMUSG00000044595	Dnd1	0.893851	0.793049	1.02374	0.906923	0.785013	0.788032	1.18309	0.800249	0.843416	1.01449	0.907672	0.964031	0.903928	1.12453	1.33242	1.667	0.6006	0.683021	1.39123	1.12899	1.19603	1.44071	1.35952	1.25763	1.39854	1.27804	1.47112	1.22867	1.06793	1.16156	1.50375	1.44791	1.44267	1.39896	1.24055	1.17967	1.23568	1.193	1.29444	1.17656	1.4195	1.40696	1.08894	1.15238	1.37505	1.23291	1.17065	1.37204
ENSMUSG00000044763	Trmt10c	4.64433	4.764	4.76259	4.94982	5.24357	5.1582	4.74382	4.83716	5.09668	5.01263	5.11084	5.08915	4.75959	4.75484	4.75516	5.16464	5.08309	5.28995	4.56149	4.50489	4.62065	4.46359	4.41519	4.42019	4.71015	4.70898	4.77128	4.51273	4.52685	4.56329	4.65142	4.55892	4.73737	4.5282	4.44133	4.47846	4.56571	4.49155	4.52175	4.48579	4.32986	4.19746	4.27294	4.17646	4.13282	4.63957	4.56271	4.35949
ENSMUSG00000044786	Zfp36	3.36681	3.32717	3.34144	2.93958	2.83782	3.18493	3.33515	3.04266	2.91313	2.5984	2.82241	2.74147	3.8689	3.92549	3.93741	2.55634	2.97319	2.79304	4.85119	4.68976	4.67941	3.30926	3.21155	3.09349	3.62267	3.58834	3.47273	3.0125	2.96687	2.87037	3.85122	4.04337	3.43928	3.36194	2.92554	3.07898	2.93767	2.82466	2.88741	5.06383	4.91496	5.50235	3.63582	3.44326	3.56302	4.64932	4.55736	4.75691
ENSMUSG00000044986	Tst	4.53034	4.46545	4.4428	3.37628	3.63263	3.33259	3.54817	3.34018	3.11731	2.85562	2.90244	3.09898	3.63737	3.46698	3.51911	2.81737	2.81982	2.6753	3.49058	3.57628	3.71709	3.20581	3.47948	3.19925	3.79678	3.6162	3.37037	2.97836	3.10355	3.00964	3.76643	3.64138	3.71058	3.34195	3.02832	3.17356	4.74241	4.74762	4.72383	3.72783	3.83608	3.64697	3.0058	3.38172	3.19073	4.22479	4.10856	4.13909
ENSMUSG00000045193	Cirbp	6.32	6.23652	6.19809	5.81211	6.19523	5.72217	6.46523	6.54786	6.35041	6.10435	6.30628	6.12489	6.40012	6.49655	6.43041	6.01405	5.92263	5.77442	6.73083	6.71529	6.91423	6.74415	6.72225	6.5876	6.79482	6.75554	6.99077	6.84484	6.57798	6.98564	6.78094	6.78445	7.07392	6.78228	6.56555	6.81179	6.71547	6.66491	6.79786	6.94513	6.89578	6.93114	6.80649	6.87529	6.84757	7.14292	6.73243	6.90401
ENSMUSG00000045817	Zfp36l2	4.7151	4.60941	4.61658	5.74574	5.45866	5.76177	5.00529	5.02636	5.23365	4.9133	5.0164	4.97896	5.52322	5.41119	5.6119	5.00098	5.17783	5.00896	5.2166	5.5639	5.50733	5.81652	5.72084	5.74365	5.28831	5.80918	5.62594	5.19584	4.99803	5.08025	5.67226	5.66102	5.58689	5.04695	5.07703	5.04385	3.3325	3.51648	3.24516	5.73282	5.95116	5.33073	6.09433	6.02709	5.65598	5.65389	5.67883	5.8968
ENSMUSG00000045932	Ifit2	2.88641	3.02328	2.92631	3.16201	2.87565	3.26803	3.14983	3.19653	3.25757	3.06637	3.36785	3.31972	3.22001	3.30493	3.24323	3.44352	2.96006	3.25727	3.4788	3.51172	3.57801	3.93543	3.83241	3.73281	3.30999	3.30926	3.16465	3.61126	3.38757	3.56869	3.38733	3.26119	3.22751	3.56315	3.64129	3.6086	2.88695	2.89497	2.92543	3.18151	3.09136	2.8658	3.95193	3.96721	3.73334	2.67891	2.71049	2.58976
ENSMUSG00000045996	Polr2k	4.11293	4.34621	4.39094	4.31386	4.74541	4.80303	4.06832	4.41448	4.32408	4.70327	4.76173	4.68352	4.07662	4.26423	4.07202	4.33115	4.84636	4.84571	4.29153	3.85094	3.87677	3.931	4.18295	3.90612	4.05347	3.97186	4.24956	3.96403	3.8945	3.91336	3.97867	3.93934	4.04615	4.15814	3.90036	4.13971	4.09051	3.85098	3.75053	3.91877	3.93067	3.80789	3.82435	3.79	3.73219	4.00114	4.2133	3.98522
ENSMUSG00000046441	Cmtr2	3.14652	3.26525	3.17771	3.26805	3.23294	3.28257	2.83615	2.93003	2.99866	3.05917	3.10189	3.15782	2.86857	2.76911	2.89491	3.25989	3.33795	3.3473	2.94469	2.99383	2.83383	3.37767	3.33865	3.18771	3.28672	3.23857	3.11269	3.24498	3.11449	3.22665	3.01043	3.10499	3.03209	3.28472	3.28527	3.30237	3.49515	3.51502	3.41865	2.49947	2.5702	2.34684	2.82317	2.98638	2.61471	2.80725	2.88813	2.5697
ENSMUSG00000046865	Fbl	5.11497	4.98491	4.98214	5.10163	5.32076	5.0994	4.85376	5.10952	4.99947	5.2615	5.98123	5.41861	4.66113	4.78897	4.71593	5.63388	5.29852	5.34148	5.53454	5.39453	5.49474	5.16487	5.25845	5.03675	5.42655	5.2751	5.39424	5.23322	5.08223	5.17795	5.41707	5.36468	5.65047	5.21547	5.00483	5.06678	5.20938	5.22595	4.95113	4.4904	4.69603	5.16238	4.28738	4.50637	4.4299	5.06377	5.03598	4.86616
ENSMUSG00000046876	Atxn1	0.486153	0.413423	0.448274	0.376064	0.268171	0.457068	0.319406	0.393741	0.343569	0.42419	0.380937	0.287862	0.468257	0.40801	0.546269	0.22292	0.450702	0.486744	0.884206	0.833213	0.717318	1.39213	1.20064	1.1254	1.10035	0.960578	0.921495	0.898374	0.703205	0.772807	1.17628	1.0804	1.01502	1.10443	1.09364	0.884733	0.88193	0.8804	0.947963	1.20129	1.51745	1.48802	1.72853	1.60967	1.77215	1.58195	1.23928	1.53317
ENSMUSG00000047583	Tyw3	4.28346	3.90279	3.73925	3.84306	4.05545	3.77296	4.16993	3.99307	3.80576	4.23642	4.09357	3.95812	4.00201	4.03397	4.06537	5.21794	4.54191	3.90641	3.62869	3.77006	3.51502	4.04195	4.18161	4.0921	3.69738	3.72396	3.67595	4.02621	4.15154	4.04778	3.52446	3.7613	3.77332	4.02582	4.10919	4.14227	3.74889	3.81684	3.67924	3.39035	3.69577	3.39425	4.12163	4.53958	3.79408	4.01042	3.8267	3.68349
ENSMUSG00000047656	Trpt1	2.46651	2.25098	2.37751	2.45656	2.29733	2.18434	2.37299	2.39475	2.22624	2.22022	2.36953	2.18163	2.06214	2.4577	2.17571	2.47151	2.49164	2.20653	2.69371	2.72064	2.69445	3.14131	3.18416	2.96647	2.89263	2.71137	2.71847	3.0067	2.94047	3.0933	2.72657	2.69781	2.86012	3.19393	2.89276	3.08102	2.82825	2.85959	2.77131	2.85659	2.86596	2.74086	2.98145	3.02022	3.12211	2.84851	2.82226	3.0129
ENSMUSG00000047675	Rps8	9.54164	9.7478	9.72621	9.8014	10.7818	9.93684	9.8067	9.84513	9.79401	9.92435	9.51349	9.83534	9.79945	9.8239	9.68374	10.1428	9.87819	10.0612	10.0837	9.77891	10.2095	10.0786	10.3099	10.1862	10.452	10.4103	10.5356	10.264	10.2399	10.2899	10.4149	10.3079	10.3011	10.3124	9.94738	10.2556	10.3167	10.3094	10.3708	9.80895	9.914	9.91551	9.30561	9.43149	9.51586	9.9621	9.95341	10.0833
ENSMUSG00000047686	Zcchc5	0.0286803	0.0119536	0.0110997	0.0657982	0.0133647	0	1.31695	1.73212	1.56101	2.2704	2.05165	2.31362	0.845073	0.500912	0.721593	0.213722	0.045997	0.17249	0.674052	0.594363	0.40388	1.7568	1.46474	1.33414	4.90184	4.70698	4.23432	5.98144	5.48132	5.37684	0.4216	0.475797	0.381959	0.959167	0.82887	0.65126	0.349826	0.555219	0.107949	0.257506	0.360501	0.26758	4.02644	4.20001	4.07988	1.2517	1.55997	1.39549
ENSMUSG00000047749	Zc3hav1l	5.6095	5.7062	5.66845	5.55361	4.9419	5.52608	5.93017	6.07065	6.01345	5.53259	5.5688	5.4633	5.90867	5.93982	6.01255	5.40673	5.53138	5.49882	5.9471	5.99896	5.90228	5.6603	5.59146	5.47183	6.05168	6.12161	6.02177	5.69678	5.63999	5.61512	6.0394	6.00906	6.014	5.44141	5.77779	5.49474	5.70488	5.75087	5.74321	5.54426	5.469	5.39495	5.30873	5.2311	5.07118	5.47638	5.48689	5.40751
ENSMUSG00000048109	Rbm15	4.15031	3.84115	3.96874	4.04569	3.09893	3.99104	4.08465	3.90749	3.90564	3.99128	4.01004	4.00529	3.77954	3.72771	3.79862	4.27327	3.9853	3.84386	3.56733	3.64155	3.58702	3.99579	4.07409	3.96328	3.60758	3.74025	3.61696	3.92892	4.01863	3.91848	3.59343	3.77264	3.68185	3.94392	4.22936	3.95387	3.9063	3.92512	3.75649	2.90039	2.85812	2.86595	3.47364	3.44299	3.01122	3.15356	2.98141	2.92956
ENSMUSG00000048758	Rpl29	9.89296	9.92159	9.87845	10.0835	10.2751	9.96741	10.1888	9.99059	9.57886	10.1453	9.99319	9.84463	9.80882	9.80509	10.0464	10.0947	9.87307	10.0535	9.68147	9.54302	9.80127	9.6034	9.78233	9.581	9.90044	9.86429	9.80259	9.74618	9.60445	9.69507	9.79379	9.82649	9.85272	9.77907	9.57096	9.67384	9.782	9.68755	9.65266	9.45695	9.58111	9.40355	9.11232	9.08456	9.23531	9.46156	9.55183	9.70252
ENSMUSG00000049184	Purg	4.66624	4.55445	4.6818	4.7201	4.66084	4.70404	4.4813	4.44776	4.49584	4.72996	4.73406	4.86456	4.55792	4.4983	4.64418	4.63251	4.47897	4.77055	4.37811	4.33992	4.3218	4.946	4.93913	4.52071	4.55599	4.51054	4.31757	4.97617	4.8529	4.86756	4.45771	4.39991	4.37134	4.99114	4.82361	4.74955	4.96732	4.9118	4.73395	3.90646	4.02193	3.93733	4.95552	5.01412	5.00689	3.8621	4.09181	4.03038
ENSMUSG00000049396	Gemin4	4.95907	5.00615	4.72878	5.22884	3.51994	4.60017	4.95796	5.1857	4.9734	4.91434	5.11048	5.11493	4.37292	4.72837	4.35071	4.46733	4.88294	5.11438	4.87719	5.19489	5.12702	4.66787	4.95548	4.84815	5.1391	5.22095	5.0922	4.84533	4.84468	4.89175	5.16219	5.22872	5.11748	4.87603	4.8822	4.95398	5.04787	5.08469	5.07429	4.65137	4.66498	4.8042	4.01838	4.13759	3.97205	4.4768	4.53613	4.72194
ENSMUSG00000049751	Rpl36al	5.38657	5.17848	5.25844	5.66575	5.98891	5.68117	5.42065	5.42278	5.48812	5.41608	5.89117	5.68093	5.25359	5.18698	5.25412	5.74132	5.64793	5.7724	5.27693	5.08309	5.12574	4.67151	4.83462	4.64964	5.20614	5.22535	5.34772	4.86533	4.87717	4.84905	5.19588	5.23694	5.42703	4.81015	4.39373	4.76981	4.93954	4.92353	4.78975	5.31053	5.41033	5.2338	4.42537	4.56337	4.52357	5.06343	5.26712	5.22959
ENSMUSG00000049950	Rpp38	4.4915	4.66066	4.78422	5.03624	5.31663	5.12941	4.59423	4.79548	4.87567	4.75037	4.87678	4.92981	4.64981	4.68092	4.741	4.81681	4.90458	5.11252	4.1433	4.15793	3.91542	3.88321	4.17082	4.09486	4.55667	4.41568	4.42192	4.07406	4.2779	4.09086	4.37114	4.28737	4.32263	4.05735	3.99485	4.29232	4.53215	4.49299	4.38834	4.04249	4.16965	3.90887	3.80437	3.88866	3.88762	4.41342	4.49857	4.28618
ENSMUSG00000050192	Eif5a2	3.53083	3.65083	3.57805	4.03058	3.73208	4.22984	3.46418	3.62907	3.77294	3.94102	3.96578	3.98193	3.56032	3.55483	3.61791	3.85325	4.08985	4.12384	4.16033	4.13378	4.21724	4.02335	3.9536	3.89678	3.89425	3.85332	3.93557	3.8698	3.69777	3.82451	3.88166	3.79967	3.86685	3.83197	3.82244	3.88024	3.52882	3.4883	3.46609	3.84102	3.65572	3.54985	3.78113	3.68577	3.53333	3.51081	3.46779	3.43341
ENSMUSG00000050244	Heatr1	4.46669	4.74982	4.4732	4.84934	4.29928	4.88012	4.68985	4.77142	4.77398	4.76939	4.90231	4.7152	4.41483	4.63706	4.39753	4.78848	4.92042	4.8404	4.51507	4.59183	4.65132	4.4619	4.46953	4.40057	4.70439	4.69467	4.66077	4.52554	4.30765	4.46072	4.63366	4.63038	4.59425	4.39078	4.54362	4.38933	4.52946	4.55955	4.49656	3.95177	4.10411	4.19801	3.79629	3.92748	3.81229	4.12016	4.15402	4.31368
ENSMUSG00000050312	Nsun3	2.92167	2.92682	3.2631	2.80468	2.5665	3.55974	3.37734	3.30797	3.39236	3.39108	3.04195	3.29592	3.38031	3.28205	3.65214	3.26091	3.07092	2.72288	3.18567	3.07511	3.34507	2.73339	2.7516	3.04684	3.24426	3.20782	3.43712	3.15175	2.71619	2.77653	3.30934	3.18797	3.79775	3.03537	2.93878	3.13074	3.12689	3.13742	3.45299	3.73689	3.4969	3.65167	3.65551	2.9403	3.20256	3.85184	3.74277	3.61065
ENSMUSG00000050966	Lin28a	5.17117	5.52104	5.55013	4.88569	4.76011	4.98624	6.18758	6.26628	6.4048	5.05319	5.11731	5.15504	5.97012	6.09946	5.8489	4.96207	5.03601	5.17666	3.03206	3.26866	3.47077	0.684257	1.02444	1.07055	2.42639	2.5135	2.78383	1.08653	1.40723	1.44531	2.72811	2.7693	3.12327	0.539263	0.730058	0.560657	1.68138	1.79766	1.93759	2.09489	1.45196	1.55475	0.122008	0.108912	0.111779	0.955113	0.643275	0.741135
ENSMUSG00000052293	Taf9	6.6739	6.48568	6.59676	6.53694	5.97508	6.45913	6.40045	6.24135	6.26509	6.45317	6.03767	6.45126	6.64398	6.39055	6.84855	7.12989	6.6026	6.35021	4.83181	4.49411	4.7134	4.96983	5.32221	4.85127	4.79847	4.60269	4.69238	4.75947	4.82439	4.90749	4.99214	5.09977	5.0557	4.87796	4.61275	4.82555	5.01696	4.75834	4.63112	5.98611	5.60029	5.21076	6.06443	5.72556	5.80646	5.39642	6.00698	5.48709
ENSMUSG00000052707	Tnrc6a	5.01053	5.18585	5.13881	5.36278	4.82276	5.33496	5.12299	5.26999	5.2585	5.56831	5.57443	5.52734	5.0954	5.16091	5.21618	5.28552	5.41193	5.42187	4.8026	4.81151	4.75551	5.26065	5.14459	4.98916	4.87619	4.97375	4.76791	5.44423	5.25724	5.31823	4.81019	4.85831	4.82094	5.27889	5.44268	5.1746	4.96556	4.94071	4.83016	4.45864	4.55375	4.48868	4.92213	4.88818	4.86826	4.49506	4.49736	4.59653
ENSMUSG00000052751	Repin1	5.46474	5.38752	5.4066	4.94755	4.47179	4.93476	5.43498	5.29494	5.07527	5.07929	4.82009	4.87429	5.28446	5.10312	5.33572	5.04281	4.8988	4.83618	4.81564	4.86142	5.03364	4.84594	4.90475	4.80163	4.92744	4.94784	4.80993	4.73871	4.67978	4.88179	4.92112	4.91725	4.87404	4.5325	4.45253	4.52611	5.24528	5.25723	5.24209	4.4167	4.37921	4.36297	4.41267	4.45633	4.29418	4.36433	4.2251	4.28754
ENSMUSG00000052928	Ctif	3.38906	3.39143	3.28544	3.38687	2.79498	3.23191	3.34988	3.32122	3.04917	3.49017	3.45409	3.33591	3.05029	3.1358	3.1563	3.27716	3.42001	3.26766	3.21827	3.31161	3.13983	3.86043	3.9234	3.76168	3.39058	3.42096	3.22817	3.81756	3.8099	3.75598	3.20683	3.1745	3.09112	3.79715	4.00405	3.76918	3.39507	3.44732	3.39183	3.12426	3.14242	3.18856	4.04467	3.96711	3.95435	3.15162	3.14791	3.15191
ENSMUSG00000053453	Thoc7	7.25571	7.40753	7.35537	7.51546	7.93105	7.7563	7.34667	7.51401	7.73072	7.61437	7.65546	7.7131	7.33521	7.42528	7.2997	7.79263	7.80434	8.02015	7.48403	7.39247	7.55092	7.38018	7.48174	7.37794	7.37013	7.40261	7.48422	7.45236	7.44072	7.5021	7.39997	7.34097	7.49043	7.49632	7.39558	7.57496	7.49176	7.41099	7.42541	6.87994	6.94908	6.93916	6.66724	6.70672	6.81222	7.02191	6.90491	6.80003
ENSMUSG00000053746	Ptrh1	2.23151	2.31509	2.25828	1.57729	2.27741	2.13442	1.92005	1.88756	1.89695	2.24092	2.14172	2.18163	1.81822	1.8066	2.10325	2.12875	2.12148	2.22653	2.24504	2.17034	2.45917	2.57544	2.75954	2.29277	2.23025	2.3971	2.19648	2.64402	2.56072	2.63301	2.56681	2.32829	2.12631	2.73304	2.43381	2.28352	2.70873	2.53464	2.45	2.61068	2.47383	2.35342	2.61176	2.77102	2.78638	2.60474	2.40377	2.60113
ENSMUSG00000053801	Grwd1	5.98479	5.90062	5.85999	6.13297	6.20275	6.06075	6.02608	5.87452	5.568	6.03194	6.00575	5.90181	5.57279	5.68116	5.58884	6.02685	6.01977	5.97627	5.82112	5.77727	5.97011	5.69189	5.8763	5.83796	6.0312	5.89306	5.84978	5.87156	5.83103	5.88296	5.9222	5.91752	5.95217	5.83536	5.66983	5.7958	5.97466	5.97298	5.94653	5.38164	5.45579	5.60418	5.00224	5.14985	5.11567	5.57203	5.53648	5.62331
ENSMUSG00000054003	Tdrd9	1.66248	1.27737	1.27258	0.702978	1.22993	0.853742	0.988568	1.15401	1.26849	0.569329	0.815142	1.19813	1.63741	1.63503	1.38484	1.12786	0.769806	0.825611	1.36148	1.31204	1.3047	0.909854	0.805244	0.732862	1.31022	1.23871	1.14377	0.920037	0.822049	0.889039	1.61581	1.56049	1.61593	0.968384	0.808715	0.76946	1.06663	0.994033	1.26091	0.885732	1.10275	1.02872	0.657619	0.606151	0.729346	1.01724	0.653928	1.0255
ENSMUSG00000054256	Msi1	7.59619	7.56657	7.51208	7.17057	6.60735	7.09319	6.64834	6.54081	6.28538	6.7257	6.79901	6.69304	6.78888	6.75608	6.9392	7.0465	6.98452	6.98168	6.32778	6.22056	6.36198	6.58382	6.59093	6.42914	6.44161	6.45516	6.21985	6.28361	6.10898	6.26867	6.38308	6.44724	6.46848	6.5627	6.54753	6.5002	7.63278	7.61783	7.53139	5.9793	6.05708	5.94922	5.96452	6.15301	6.11175	5.9515	5.87372	6.09069
ENSMUSG00000054312	Mrps21	8.01429	8.00133	7.86238	8.15255	8.44806	8.28053	7.83578	7.77739	7.85886	8.19478	8.52698	8.17311	7.68446	7.85907	7.82968	8.42772	8.28168	8.4843	7.3203	7.24329	7.31177	7.58427	7.71219	7.58869	7.21796	7.45841	7.11758	7.44174	7.54468	7.57978	7.34399	7.27721	7.43792	7.74141	7.54624	7.73468	7.59358	7.49159	7.40423	7.2588	7.38047	7.27862	7.36955	7.60384	7.64927	7.27577	7.35524	7.34433
ENSMUSG00000054509	Parp4	1.358	1.33498	1.40219	1.09443	1.28831	1.06962	1.66485	1.67565	1.57398	0.730584	0.820552	0.821553	1.75547	1.89876	1.73264	0.587934	0.772095	0.803508	1.6451	1.82851	1.75324	1.01734	0.790256	0.820506	1.26858	1.4472	1.25713	0.751997	0.564165	0.684983	1.10182	0.944958	1.00267	0.562193	0.616292	0.4803	1.03473	1.06013	0.984551	1.35865	1.38687	1.30359	0.853726	0.749144	0.936741	0.996474	1.14198	1.09926
ENSMUSG00000054582	Pabpc1l	2.63893	2.5061	2.97394	1.20019	0.961498	1.46721	2.47197	2.1223	2.20806	0.984585	1.46829	1.46661	2.32321	2.41548	2.02284	0.409128	1.18789	1.65648	2.58823	2.21843	2.33308	1.32151	1.57849	1.44381	2.24269	1.82485	2.09448	1.24541	1.48003	1.20881	2.00688	2.11626	2.17711	1.41667	1.16322	1.17669	3.48628	3.46935	3.28999	1.89671	1.64428	1.94051	1.74624	1.42768	1.73668	1.63265	1.84437	1.6072
ENSMUSG00000054679	Srsf12	2.54294	2.30951	2.37164	2.70974	1.84915	2.64503	2.56173	2.40799	2.60493	2.44716	2.38341	2.23105	2.29895	2.46951	2.38805	2.31277	2.18479	2.20715	2.71324	2.78225	2.88274	3.48716	3.2244	2.9114	3.0046	2.7232	2.81099	2.86143	2.5793	2.78235	2.8878	2.69472	2.71968	3.05777	2.57526	2.75552	2.32376	2.53038	2.41745	3.23096	3.13202	3.12339	4.04842	4.06453	4.1614	3.16208	3.02291	3.01369
ENSMUSG00000055538	Zcchc24	0.638728	0.729485	0.870908	5.42513	5.05477	5.47645	0.593264	0.519528	0.722404	4.87696	4.82493	4.83729	0.663374	0.757192	0.782076	5.27043	5.17552	5.22719	0.617049	0.664855	0.542886	5.96148	5.92131	5.78374	0.858433	1.27238	1.29967	5.96929	5.82453	5.76493	0.919416	1.0883	0.859227	5.86918	5.89173	5.69337	1.83789	2.10743	1.25351	0.991572	0.949042	1.01962	6.11396	6.03448	6.08865	1.07924	1.10176	0.884317
ENSMUSG00000055760	Gemin6	5.09702	5.03443	5.08428	5.24637	5.74854	5.57125	5.10639	5.08957	5.32728	5.44284	5.55227	5.48173	5.0029	5.16836	5.03178	5.389	5.57555	5.58503	4.93066	4.94645	5.00654	5.0862	5.16355	4.9483	5.06041	5.00493	5.07418	5.14032	5.09461	5.22652	5.05447	5.1839	5.21267	5.20712	5.15741	5.30308	5.00693	5.05222	4.93307	4.63398	4.5961	4.50838	4.35885	4.38988	4.35205	4.92701	4.87669	4.56806
ENSMUSG00000055762	Eef1d	9.03256	8.89308	8.88282	9.26161	9.75651	9.2645	8.98197	8.86311	8.83146	9.20475	9.47185	9.15812	8.73913	8.87265	8.71798	9.51591	9.2346	9.27294	8.60852	8.50598	8.65915	8.60355	8.72782	8.54669	8.63051	8.53872	8.71632	8.7859	8.7161	8.7699	8.70952	8.66234	8.816	8.7198	8.59946	8.77386	8.66133	8.62189	8.56336	8.55224	8.60213	8.73719	8.26059	8.36624	8.48384	8.59581	8.59063	8.63673
ENSMUSG00000056209	Npm3	7.79823	7.54231	7.58165	6.95249	7.10764	7.0537	8.09747	7.92752	7.79313	6.92201	7.1306	6.73996	7.70869	7.82249	7.74743	7.17101	6.90125	7.14288	6.95223	6.74424	6.94138	6.81944	7.03669	6.76552	7.54774	7.4277	7.6066	6.78507	6.73249	6.80312	7.66482	7.62452	7.99249	6.71807	6.48195	6.88369	7.66079	7.69565	7.74539	6.42582	6.59824	6.66162	6.15553	6.52426	6.24864	7.06446	7.02339	6.93742
ENSMUSG00000056305	Usp39	6.39053	6.48724	6.29382	6.78103	6.81826	6.69994	6.3296	6.2582	6.28174	6.64465	6.68191	6.63938	6.12581	6.14745	6.07915	6.64365	6.69636	6.78529	5.95065	5.95543	6.0353	6.2202	6.29795	6.19731	5.98326	5.98484	5.93657	6.29617	6.22984	6.33782	6.04314	6.07925	6.13261	6.3531	6.32763	6.39294	6.22784	6.23122	6.25752	5.78537	5.80692	5.87662	5.79953	5.87979	5.99699	5.8619	5.92206	5.85434
ENSMUSG00000057113	Npm1	11.1151	11.2361	11.1021	11.7131	11.9042	11.9346	11.18	11.2835	11.4823	11.7521	12.0682	11.8182	10.9603	11.1836	11.0628	11.8811	11.8558	12.1928	10.7989	10.6912	10.7568	10.6436	10.6565	10.6669	10.8276	10.6899	10.9502	10.7506	10.7861	10.7698	10.8075	10.8399	10.9506	10.6942	10.6243	10.7395	10.5655	10.5164	10.4619	10.5788	10.5172	10.484	10.2565	10.1077	10.2061	10.6753	10.7269	10.4628
ENSMUSG00000057278	Snrpg	8.05723	8.09692	8.16722	8.15981	9.18608	8.68039	8.1923	8.16725	8.4349	8.54239	8.53428	8.53004	8.04729	8.24077	8.06518	8.47566	8.69087	8.92058	8.70524	8.52193	8.87556	8.77139	9.00369	8.77399	8.92606	8.80582	8.91786	8.99577	8.76322	9.02498	8.99431	8.80658	9.03304	9.02861	8.7789	9.12573	8.87701	8.83579	8.80312	8.07313	8.15586	8.05899	7.61531	7.69103	7.67721	8.47359	8.30273	8.26238
ENSMUSG00000057322	Rpl38	5.65138	5.69167	5.48893	5.89493	5.47807	5.84093	5.91019	5.90449	5.67537	5.84979	6.32554	5.79586	5.37285	5.47786	5.57231	6.18235	5.68756	6.00934	6.18257	6.02487	6.12415	5.71884	5.86693	5.67496	6.28081	6.41111	6.15032	5.84921	5.58322	5.57474	6.24481	6.23807	6.38463	5.91635	5.44343	5.59146	5.95888	5.95657	5.79942	5.4957	5.80159	5.6354	4.84903	5.28004	5.22145	5.80162	5.67937	5.72258
ENSMUSG00000057541	Pus7	4.78566	5.00219	4.81469	5.37466	5.14361	5.47838	4.74066	4.81261	4.85931	5.08835	5.31446	5.23356	4.44087	4.51718	4.48256	5.79645	5.43845	5.43678	4.39089	4.36874	4.34506	4.55789	4.6074	4.52815	4.66502	4.64171	4.65249	4.74297	4.68031	4.80179	4.55167	4.52088	4.57377	4.61341	4.62921	4.60268	4.75175	4.73695	4.70834	4.37106	4.4311	4.47796	4.639	4.59961	4.47892	4.63464	4.54587	4.58507
ENSMUSG00000057666	Gapdh	9.6977	9.66481	9.50315	9.39025	8.42882	9.55437	9.61826	9.63146	9.26869	9.4529	10.0015	9.46558	9.13661	9.27541	9.2814	8.77039	9.18967	9.62454	9.41948	8.94518	9.21993	8.81101	8.98939	8.90755	9.0529	9.08429	9.15566	8.81745	8.90091	8.75234	9.13826	9.29036	9.37454	8.96985	8.59889	8.8365	9.27126	9.10866	8.93727	8.22837	8.30405	8.54481	7.46392	7.82741	7.61307	8.0492	8.35095	8.22366
ENSMUSG00000057706	Mex3b	5.55907	5.46137	5.51635	6.67384	6.30558	6.65384	5.35055	5.22258	5.18102	6.15626	6.14252	6.17423	5.2992	5.2304	5.38745	6.28704	6.31083	6.37171	5.16439	5.21939	5.41153	6.88777	7.03223	6.74451	5.00074	5.399	5.30699	6.59927	6.4655	6.60154	5.29843	5.46346	5.38179	6.62677	6.59591	6.68183	5.49071	5.56877	5.54338	4.58386	4.67501	4.44416	6.6708	6.70194	6.3703	4.29543	4.40301	4.31135
ENSMUSG00000057863	Rpl36	8.20965	8.02121	7.84887	8.13021	7.81244	8.04506	8.45773	8.47789	7.91823	8.44624	8.9126	8.18124	7.97024	8.28968	8.17223	7.96195	8.19914	8.61151	8.37651	8.11855	8.39456	8.01248	8.44198	7.88289	8.48868	8.81405	8.76076	8.24559	8.14622	8.06392	8.53056	8.49522	8.71582	8.27459	7.9724	8.09397	8.37115	8.30466	8.20611	7.82958	8.37181	8.00743	7.32709	7.75851	7.5497	8.03329	8.05356	8.28156
ENSMUSG00000058355	Abce1	6.88044	7.1344	7.04002	7.49653	7.33692	7.60435	6.8912	7.12221	7.24452	7.37137	7.49114	7.44342	6.83227	6.93391	6.8736	7.25993	7.54088	7.65937	6.87768	6.81473	6.79599	6.93436	6.82585	6.84427	6.91434	6.81379	6.87087	6.94493	6.87117	6.87886	6.86161	6.85677	6.89552	6.90915	6.89139	6.86714	6.87864	6.82077	6.75628	6.7815	6.76026	6.75003	6.71042	6.65911	6.6556	6.76889	6.85304	6.75473
ENSMUSG00000058600	Rpl30	9.54637	9.57329	9.41826	9.9091	10.2044	10.1094	9.74749	9.65086	9.86939	9.90656	10.1407	10.033	9.39381	9.58962	9.55204	10.1413	10.0539	10.4337	9.68639	9.57733	9.71511	9.49851	9.66206	9.55936	9.91446	9.75734	9.84499	9.62616	9.64532	9.65413	9.82785	9.81431	9.86626	9.69458	9.48359	9.68985	9.57475	9.53405	9.47535	9.35049	9.38646	9.39913	8.97076	9.05853	9.20177	9.5745	9.5888	9.34267
ENSMUSG00000059070	Rpl18	10.028	10.0763	9.90349	10.2117	10.2376	10.2429	10.2184	10.0419	9.99029	10.2854	10.2928	10.1272	9.84793	10.0725	9.92054	10.5868	10.3668	10.4679	9.83953	9.64318	9.99416	9.76476	10.0364	9.66773	9.99066	9.84581	10.2055	10.0226	9.81401	9.94065	9.98748	9.9446	10.1885	9.95072	9.75554	10.0135	9.99709	9.92494	9.84985	9.6249	9.67659	9.79022	9.31308	9.33228	9.38826	9.95729	9.74486	9.72098
ENSMUSG00000059291	Rpl11	7.28868	7.44379	7.12747	7.23923	6.68825	7.12119	7.44498	7.58328	6.9184	7.59524	8.50346	7.50113	6.98223	6.89777	7.07754	6.8721	7.01273	7.55875	7.67429	7.258	7.46329	7.36673	7.64196	7.33413	7.62271	7.79555	7.75541	7.44636	7.6152	7.17402	7.59904	7.666	7.73032	7.52597	7.15517	7.45425	7.53849	7.49685	7.3719	6.81856	7.01822	7.49496	6.3153	6.65984	6.53695	6.93425	6.81275	6.99552
ENSMUSG00000060152	Pop5	6.69241	6.5204	6.55664	6.50967	7.27794	6.54045	5.83333	5.65622	5.5287	6.57787	6.48671	6.44874	5.60581	5.71002	5.49506	6.78622	6.43012	6.42905	5.46594	5.63811	5.50714	5.99826	6.40598	6.13251	5.58843	5.49464	5.46355	6.30059	6.19677	6.3833	5.65204	5.60644	5.60918	6.2262	6.26691	6.49601	6.66387	6.6597	6.65426	5.48058	5.56914	5.55488	5.25904	5.42366	5.55234	5.71688	5.53655	5.40777
ENSMUSG00000060288	Ppih	4.61009	4.71028	4.8488	4.90283	5.60712	4.95957	4.66453	4.79556	4.71737	5.05267	4.82576	4.72935	4.71512	4.68099	4.44207	5.02552	4.82716	5.09189	4.53896	4.55843	4.68436	4.6184	4.85406	4.7421	4.61234	4.5911	4.68658	4.49324	4.62762	4.72626	4.58862	4.57947	4.88427	4.73953	4.79384	4.96	4.58628	4.61156	4.79539	4.51035	4.41604	4.35735	4.08317	4.05812	4.24902	4.64973	4.36956	4.32757
ENSMUSG00000060938	Rpl26	11.2085	11.2961	11.2507	11.3699	11.8176	11.5736	11.4976	11.5089	11.4045	11.6197	11.7357	11.5133	11.3021	11.4544	11.3597	11.5983	11.4741	11.851	11.3144	11.2195	11.395	10.9933	11.1647	10.9694	11.5574	11.4211	11.5062	11.1365	11.0699	11.1894	11.4577	11.448	11.5606	11.1545	10.9978	11.1659	11.3376	11.2907	11.1296	11.1273	11.1365	11.0847	10.6678	10.5209	10.7367	11.3906	11.3365	11.1262
ENSMUSG00000060950	Trmt61a	4.37068	4.30872	4.36201	4.10511	4.10577	4.01022	4.44132	4.32439	4.06864	4.21285	3.9599	4.06009	3.9581	4.10816	4.10189	4.4207	4.01029	4.07347	4.24255	4.26876	4.43806	3.6792	3.91457	3.79602	4.5006	4.34106	4.33605	4.02027	3.8923	4.08339	4.49348	4.4053	4.46939	3.81939	3.81231	3.84545	4.47607	4.45444	4.49226	4.20994	4.20025	4.14678	3.45257	3.50093	3.43657	4.37046	4.19272	4.11047
ENSMUSG00000061136	Prpf40a	7.12258	7.3886	7.18539	7.56707	7.26534	7.63902	7.20709	7.32892	7.40611	7.54945	7.72199	7.62329	7.10966	7.34679	7.1833	7.97805	7.61692	7.79381	6.93533	6.77533	6.70754	6.98388	6.7909	6.78432	6.78782	6.83971	6.95719	6.8658	6.82287	6.86712	6.76496	6.80543	6.83591	6.89447	6.85614	6.76425	6.89926	6.88771	6.78737	6.61523	6.45751	6.47737	6.71249	6.54714	6.30191	6.43502	6.66445	6.4068
ENSMUSG00000061360	Phf5a	7.90359	7.94955	7.95313	8.28126	8.73003	8.41353	7.89485	7.87194	7.78282	8.33071	8.08468	8.25036	7.73422	7.70493	7.71748	8.47356	8.30341	8.33544	7.79072	7.6447	7.80373	7.86845	8.08256	7.98853	7.83048	7.69394	7.7105	7.97928	7.95229	8.00667	7.8805	7.8751	7.87763	8.07913	7.9116	8.04039	7.86407	7.86934	7.8486	7.48892	7.45077	7.5119	7.09964	7.25405	7.22107	7.47133	7.47236	7.39157
ENSMUSG00000061458	Nol10	5.11325	5.33471	5.23335	5.56681	5.46876	5.59358	5.09157	5.31397	5.21908	5.36883	5.4977	5.35018	4.96992	5.05299	5.05849	5.673	5.58028	5.63487	4.92154	4.79205	4.89815	5.07581	5.08748	4.91428	5.03873	4.90388	4.92156	5.09321	4.85653	5.00759	4.95944	5.00005	5.01196	5.04207	4.91368	4.94281	5.08532	5.02611	4.94281	4.76846	4.72702	4.82137	4.68424	4.79239	4.80749	4.73229	4.74719	4.78367
ENSMUSG00000061613	U2af1	5.16905	5.1268	5.25332	5.44488	6.22744	5.52437	5.05878	5.08535	5.15284	5.47361	5.57983	5.66875	5.10998	5.03672	4.91965	5.25296	5.57732	5.6658	4.88003	4.71689	4.73142	5.07886	5.20312	5.05746	4.97763	4.98904	4.94727	5.17546	5.11485	5.25811	5.00543	4.90744	4.934	5.11512	5.07432	5.27872	4.96875	4.99105	4.91686	4.8432	5.00082	4.95118	4.77052	5.0157	4.88285	4.96578	4.932	4.95087
ENSMUSG00000062006	Rpl34	9.26945	9.14437	9.08019	9.34029	9.83773	9.47869	9.54381	9.3169	9.2111	9.52804	9.61227	9.38549	9.13103	9.35429	9.09958	9.83918	9.52424	9.72058	9.41634	9.10808	9.33418	9.3715	9.56843	9.34133	9.58027	9.57824	9.91857	9.51142	9.34659	9.49422	9.5063	9.50585	9.74619	10.0427	9.60893	10.0499	9.41844	9.35274	9.35968	9.0878	9.29251	9.1442	8.89202	9.17753	9.07371	9.21784	9.25202	9.19106
ENSMUSG00000062203	Gspt1	7.98337	8.38734	8.16371	8.869	9.12388	8.88228	8.04172	8.10237	8.13762	8.68605	8.49065	8.60572	7.84165	7.7741	7.93853	8.48259	8.67982	8.8539	7.33345	7.40218	7.29941	7.48943	7.48588	7.56108	7.22083	7.25522	7.12938	7.50039	7.59656	7.52136	7.13116	7.24732	7.17258	7.58142	7.6926	7.59734	7.41139	7.3716	7.37355	7.28672	7.24931	7.1639	7.49398	7.29909	7.54741	7.33803	7.41698	7.33957
ENSMUSG00000062309	Rpp25	2.30209	2.23516	2.29181	0.238135	0.510952	0.323291	1.17358	1.20576	1.24258	0.220136	0.482954	0.291914	1.73702	1.25874	1.30581	0.373844	0.612056	0.792668	1.39275	1.49518	1.46255	0.0592989	0.204053	0.138948	0.907184	1.08693	0.88608	0.245855	0.228918	0.335478	1.19723	1.13228	1.37592	0.338148	0.194487	0.407331	1.61201	1.51122	1.56966	1.54452	1.53675	1.41455	0.202429	0.386615	0.30149	1.6566	1.37416	1.51344
ENSMUSG00000062328	Rpl17	3.1796	3.24522	3.54016	3.07129	4.40548	3.55758	3.44372	3.57872	3.5059	3.49531	3.51825	3.52958	3.44656	3.43665	3.37072	2.51605	3.44861	3.666	4.00623	3.77529	3.73383	3.55486	3.76521	3.58466	4.02296	4.08611	4.25273	3.72523	3.86243	3.83161	4.1104	4.05265	4.03816	3.75701	3.62656	3.65615	4.12678	3.85362	3.71936	3.60415	3.7684	3.67759	3.09629	2.78439	3.09692	3.97135	3.93502	3.81143
ENSMUSG00000062981	Mrpl42	7.53445	7.76153	7.63237	8.09223	8.4157	8.20176	7.6183	7.72068	7.79436	8.15115	8.2419	8.04453	7.55844	7.61932	7.64965	7.6867	8.11287	8.37268	7.26848	7.04605	7.12438	7.26236	7.31806	7.26782	7.26439	7.17374	7.20712	7.31039	7.26807	7.25822	7.32674	7.26252	7.317	7.37355	7.15513	7.34056	7.08788	7.03012	7.0154	7.42276	7.48162	7.47824	7.30556	7.25561	7.48731	7.44228	7.54944	7.36841
ENSMUSG00000063646	Jakmip1	1.82138	1.68072	1.7696	0.25216	0.123575	0.117766	1.49826	1.49613	1.53209	0.086903	0.126037	0.133474	1.84523	1.81079	1.67629	0	0.136441	0	0.669159	0.985848	1.00401	0.20775	0.115044	0.0905968	1.17037	1.02866	0.987752	0.126548	0.21296	0.124476	1.37461	1.15524	1.34158	0.213086	0	0.12294	1.7062	1.63804	1.73211	0.794609	0.631416	0.624188	0.290407	0.0769219	0.0623837	0.940249	0.695087	0.71076
ENSMUSG00000063804	Lin28b	5.23555	5.45763	5.4571	5.95809	5.72732	6.02284	4.80209	4.88054	5.04068	5.82967	5.94981	5.89496	5.19547	5.2764	5.14361	5.92949	6.08315	6.09148	3.32601	3.3134	3.47862	3.03318	3.07299	3.33864	3.21401	3.28178	3.38492	3.01445	3.2307	3.31907	3.48508	3.60057	3.71768	3.03866	3.18704	3.18998	3.30692	3.53677	3.63616	2.41366	2.07773	2.22737	1.38721	1.29187	1.23752	2.28827	2.03906	2.12935
ENSMUSG00000063884	Ptcd3	5.74685	5.91577	5.74695	6.18666	6.259	6.3391	5.90406	5.98128	6.07863	6.20519	6.39938	6.33634	5.74401	5.8595	5.73518	6.1731	6.37669	6.51726	5.74062	5.67677	5.69077	5.70859	5.63619	5.70443	5.80447	5.73131	5.75668	5.7337	5.67661	5.6906	5.79657	5.79427	5.82213	5.72873	5.64958	5.67953	5.63537	5.51717	5.47768	5.46316	5.39435	5.38206	5.29644	5.21734	5.24609	5.60223	5.56322	5.50057
ENSMUSG00000063919	Srrm4	2.6765	2.68346	2.58391	0.286184	0.276289	0.286123	0.0925635	0.113687	0.0263865	0.164654	0.103252	0.0509655	0.159128	0.20501	0.163473	0.472733	0.609469	0.332228	0.294234	0.340218	0.209234	0.103825	0.106074	0.144441	0.285595	0.145508	0.153419	0.031108	0.0232842	0.0601062	0.194391	0.189088	0.146823	0.13258	0.0635801	0.0408581	3.30886	3.35726	3.26548	0.175339	0.178456	0.169639	0.319808	0.381407	0.294788	0.260116	0.286716	0.329006
ENSMUSG00000066232	Ipo7	6.88423	7.01249	6.93095	7.13986	6.54175	7.30603	6.81442	6.87919	7.0527	7.07187	7.28913	7.16659	6.64772	6.78184	6.67216	7.23516	7.24682	7.41563	6.87268	6.78682	6.7497	6.70748	6.5758	6.48782	6.91914	6.89227	6.82041	6.75347	6.62534	6.66789	6.91553	6.84944	6.83047	6.68584	6.69169	6.54217	6.96162	6.87346	6.70512	6.50847	6.47218	6.36881	6.23712	6.29425	5.93104	6.60677	6.66854	6.47163
ENSMUSG00000066800	Rnasel	3.06509	2.97552	2.97783	3.22773	3.00499	3.25995	2.09182	2.25755	2.37386	2.92395	3.08317	3.17216	2.73778	2.92629	2.89691	3.08607	3.04701	3.18553	2.98085	2.93826	3.14343	4.52748	4.22939	4.05441	2.86042	2.74023	2.90285	3.93464	3.67112	3.75709	2.7241	2.62993	2.92152	4.07911	3.92111	3.93243	4.0962	4.00402	3.9894	2.81712	2.73741	2.68233	4.48769	4.38005	4.41823	2.61529	2.64493	2.6439
ENSMUSG00000067288	Rps28	8.73221	8.87032	8.98487	8.98481	9.68289	9.13079	8.9177	8.85928	8.78915	9.2031	8.85606	9.00737	8.94548	8.83698	9.081	9.04514	9.068	9.04044	9.2117	8.98751	9.20747	8.94266	9.19387	9.1128	9.47654	9.45759	9.24394	9.2518	9.33753	9.2015	9.3596	9.39104	9.23295	9.31926	8.90847	9.18641	9.33209	9.21642	9.31179	8.79588	8.87069	8.81778	8.36448	8.40058	8.54434	8.84456	9.01014	8.99857
ENSMUSG00000067369	Trmt2b	3.74513	3.76978	3.88376	3.1481	2.97001	3.29172	3.71093	3.84198	3.85099	3.52281	3.54449	3.48588	3.74042	3.91005	3.86137	3.51774	3.35167	3.37676	4.40133	4.40673	4.33397	3.61111	3.64369	3.62002	4.28851	4.10239	4.24341	3.59432	3.51434	3.70176	4.35112	4.25292	4.28418	3.52229	3.40843	3.48747	4.23357	4.18257	4.19119	4.41662	4.23073	4.30829	3.69091	3.67744	3.69527	4.21357	4.43171	4.21208
ENSMUSG00000068882	Ssb	8.83949	9.08694	9.15749	9.29065	9.41763	9.59162	8.76177	9.05565	9.42404	9.34715	9.57544	9.55083	9.042	9.10469	9.07024	9.45017	9.50931	9.78774	8.60243	8.56413	8.56476	8.5885	8.51579	8.43501	8.56011	8.46414	8.66056	8.54478	8.42723	8.69028	8.62159	8.59138	8.78808	8.53932	8.48556	8.6521	8.6234	8.5772	8.5157	8.92111	8.90061	8.79751	8.70729	8.69152	8.62483	8.89874	8.95012	8.80913
ENSMUSG00000069769	Msi2	5.91672	6.1696	6.10201	5.8268	4.97032	6.02278	6.02694	6.24227	6.35395	6.09051	6.50129	6.18706	6.1098	6.16601	6.18524	6.04543	6.28995	6.49981	6.29305	6.14117	6.03119	5.77321	5.71026	5.5549	6.51199	6.66914	6.54168	5.72196	5.80753	5.71804	6.61481	6.53369	6.50325	5.53695	5.77742	5.64352	6.38223	6.34447	6.14813	6.04455	6.13473	5.9894	5.486	5.59688	5.21769	6.16671	6.29326	6.35107
ENSMUSG00000070732	Rbm44	0.405423	0.277343	0.280911	0.805825	0.609186	0.752667	0.354322	0.380963	0.761015	0.970581	0.902209	0.68902	0.44741	0.494078	0.754357	0.557903	0.694565	0.982846	0.503184	0.440731	0.769048	1.07432	0.609632	0.689793	0.39642	0.360423	0.388258	1.25418	0.909652	0.828693	0.484896	0.522704	0.478914	0.768996	1.00231	0.564507	0.425264	0.377401	0.217826	0.578439	0.598733	0.343627	0.841042	0.590638	0.828726	0.38589	0.674735	0.454355
ENSMUSG00000070780	Rbm47	2.19405	2.12899	2.18922	0.485691	0.290098	0.152082	1.87273	1.80081	1.59208	0.111389	0.353347	0.20059	2.10792	2.19138	1.94229	0.467452	0.358855	0.321551	1.82992	1.78714	1.91608	0.506389	0.498035	0.395745	1.58333	1.87068	1.78738	0.360537	0.390607	0.236021	1.68802	1.75392	1.87125	0.262401	0.375295	0.186772	3.09379	2.97474	2.94911	1.6692	1.58439	1.76497	0.548631	0.560336	0.47872	1.59018	1.94352	1.88669
ENSMUSG00000071723	Gspt2	3.89582	3.97198	3.79719	3.56185	3.86228	3.62301	3.75439	3.82102	3.79079	3.57599	3.58927	3.54962	3.79135	3.80792	3.73259	3.42811	3.53037	3.58651	3.04755	3.27775	3.2088	3.17231	3.07772	3.01045	2.83863	3.01009	3.02741	2.91009	2.71781	2.96275	2.87451	3.05073	3.05699	2.74859	2.70564	2.6762	3.29826	3.40741	3.31182	2.91331	2.82884	3.01892	3.05165	3.00259	3.16217	2.67625	2.44364	2.6312
ENSMUSG00000072115	Ang	1.89779	1.62578	2.12504	1.28704	1.45414	1.42359	2.67396	2.71522	2.38004	1.36439	0.868364	1.28426	2.85336	2.77605	3.05446	0.686141	0.863409	1.28855	3.33697	3.05414	3.32863	2.02271	1.63191	1.33853	3.14592	2.90821	3.05869	1.62691	1.47575	1.50678	3.05464	2.94575	3.15228	1.39764	1.35829	1.37827	1.46473	1.6655	1.49016	2.92078	3.03503	3.19753	1.94521	2.0936	2.33818	2.90576	3.00243	2.93613
ENSMUSG00000072437	Nanos1	1.76527	1.55181	1.81125	1.37606	1.31089	1.55005	1.01077	1.04951	1.05687	1.69811	1.53625	1.81219	1.44824	1.38232	1.4681	1.38391	1.5463	1.52574	1.37648	1.36017	1.32953	1.90401	1.87473	1.76298	1.28648	1.2204	1.33366	1.8888	1.76818	1.75832	1.47269	1.56521	1.82813	1.75584	1.69313	1.83024	1.96115	1.97652	1.89227	0.847102	1.10141	0.927331	1.96589	1.87554	1.78609	1.00275	0.942165	1.01603
ENSMUSG00000073460	Pnldc1	1.61348	1.57816	1.69344	0.723455	1.22635	1.00664	1.67983	1.81167	1.79704	1.06191	1.22743	1.41973	1.78095	2.15631	2.14853	1.38845	1.07968	1.31552	2.56996	2.60251	2.49089	1.16774	1.0787	1.09169	2.42386	2.49603	2.63916	1.09655	0.697419	0.965174	2.66749	2.47922	2.7228	1.43465	1.11047	1.16747	1.9699	2.09718	2.01702	2.12375	2.19823	2.24097	0.925374	0.999954	1.16883	2.88723	2.44328	2.56047
ENSMUSG00000074656	Eif2s2	6.2382	6.39388	6.39831	6.83283	7.14858	6.92283	6.12168	6.30681	6.51828	6.76139	6.86483	6.9574	6.25934	6.2855	6.24934	6.97396	6.95285	7.02851	6.06602	5.95613	5.98806	6.24955	6.19131	6.19074	6.00976	5.91069	6.03249	6.48145	6.39101	6.51977	6.07472	6.00544	6.11632	6.65422	6.58784	6.70511	5.94339	5.89656	5.86874	6.3663	6.21238	6.19131	6.4903	6.46039	6.52941	6.34543	6.28051	6.18277
ENSMUSG00000074682	Zcchc3	5.51313	5.67325	5.61495	6.21666	6.09244	6.08215	5.37963	5.48917	5.45728	6.39361	6.23467	6.3034	5.51763	5.38405	5.55197	6.04973	6.17396	6.12016	5.19238	5.22483	5.41151	6.16201	6.17491	6.07493	5.22919	5.40487	5.2825	6.40114	6.29639	6.35456	5.22147	5.26098	5.27007	6.1157	6.14082	6.1051	5.37619	5.39127	5.46693	5.1085	5.03556	4.94556	5.80429	5.93609	5.85211	5.17246	5.01527	5.22136
ENSMUSG00000074817	Papolb	1.28594	1.03111	1.30173	1.01743	0.82884	0.914359	1.12131	1.18264	1.11375	1.04653	0.865949	1.32696	1.3106	1.12013	1.17399	1.05187	1.05467	0.840151	0.842781	0.988264	0.929961	1.13408	0.997279	1.1153	1.08923	0.995821	0.951574	1.12171	1.17218	1.40638	1.04167	1.09327	1.11727	1.17347	1.29501	1.16826	1.08169	1.14851	1.15677	1.69191	1.4477	1.38562	1.6265	1.58609	1.36761	1.70121	1.61886	1.44788
ENSMUSG00000074890	Lcmt2	3.50703	3.32164	3.3899	2.86144	2.90742	3.24408	3.42648	3.37003	3.38841	3.05739	3.09037	3.07995	3.32659	3.40836	3.34128	3.4849	3.06291	3.07105	3.72026	3.9192	3.90535	3.49451	3.89302	3.55187	3.68298	3.8677	3.6688	3.50001	3.76429	3.5898	3.61913	3.85176	3.71771	3.59161	3.65155	3.6215	3.7824	3.95234	3.92889	2.92551	2.98702	3.02521	2.93333	3.00175	2.72437	3.22328	3.11843	3.10008
ENSMUSG00000074909	Ranbp6	3.40908	3.43334	3.43138	3.94856	3.74611	3.92313	3.28813	3.29651	3.52524	3.84787	3.88364	3.96075	3.36972	3.33873	3.32572	3.8654	3.99779	4.01047	3.66007	3.64133	3.62411	4.0806	4.01559	4.01099	3.31788	3.37729	3.46661	4.07156	3.86723	4.0801	3.44853	3.45203	3.37353	4.07052	4.08211	4.13305	3.45187	3.43429	3.39192	3.31215	3.07487	3.27799	3.52952	3.3851	3.42229	3.18822	2.98335	3.01748
ENSMUSG00000078812	Eif5a	10.5421	10.6443	10.6125	11.0268	11.2338	11.0225	10.6857	10.5416	10.373	11.0241	11.0618	10.9022	10.2607	10.2466	10.3731	11.0474	10.9659	11.0716	10.1608	10.0396	10.1346	9.98121	10.2125	10.1267	10.0799	10.1433	10.0221	10.1457	10.1752	10.1733	10.1521	10.1252	10.2461	10.1308	10.08	10.1728	10.2159	10.1432	10.1369	9.99416	10.1208	10.0342	9.51437	9.67063	9.68189	10.0139	9.99616	10.0871
ENSMUSG00000079043	Fastkd5	4.07011	4.20778	4.12687	4.42992	4.25101	4.4075	4.16982	4.26369	4.27123	4.43465	4.33099	4.30932	3.99354	3.95492	4.14797	4.21152	4.28497	4.44737	3.87105	3.84523	3.93896	3.88832	3.84294	3.79809	4.03275	3.90417	4.06212	3.8692	3.84438	3.8446	3.96376	3.80673	3.95595	3.90872	3.96771	3.8328	3.9692	3.92819	3.90162	3.84422	3.66868	3.71523	3.51765	3.4821	3.55132	3.61265	3.82882	3.68215
ENSMUSG00000079259	Trim71	3.31096	3.50387	3.43459	3.69871	3.42186	3.63377	3.36675	3.39589	3.37261	3.31686	3.52746	3.37944	3.45118	3.46909	3.38681	3.81547	3.79023	3.5621	2.35896	2.56642	2.6894	1.89994	1.95488	2.13475	1.97181	2.35618	2.32306	1.29425	1.46579	1.68736	2.19358	2.48249	2.56387	1.7421	2.16685	1.97359	1.70857	1.91061	1.99079	1.47669	1.23281	1.38462	0.830504	0.688891	0.74068	0.989137	0.859132	0.939893
ENSMUSG00000079435	Rpl36a	5.78308	5.70938	5.74405	6.07014	6.58232	6.15861	5.56744	5.84654	6.05818	5.98387	6.46723	6.31815	5.7636	5.85068	5.66138	6.32617	6.38363	6.38152	5.48684	5.26357	5.3591	5.16421	5.32866	4.98699	5.43781	5.2419	5.50117	5.26859	5.14579	5.42742	5.44893	5.23914	5.50977	5.18053	5.29828	5.2676	5.28775	5.25118	5.12489	5.85373	5.97118	6.10145	5.4187	5.4203	5.63714	6.09595	5.86261	5.87456
ENSMUSG00000079480	Pin4	4.34801	4.37	4.29531	4.26918	4.20821	4.71925	4.57531	4.20565	4.40196	4.57316	5.29656	4.87158	4.05466	4.44882	4.24558	5.17186	4.73075	5.09047	3.64177	3.60514	3.49451	3.58066	3.47233	3.3901	3.54602	3.71651	3.68566	3.5231	3.10214	3.41158	3.51448	3.53881	4.01693	3.57773	3.23537	3.48855	3.28047	3.52822	3.09178	3.84589	4.27831	3.67262	3.65071	3.97891	3.89807	4.05664	3.97923	3.94843
ENSMUSG00000084128	Esrp2	5.07733	4.98219	5.1159	0.255768	0.106842	0.0824034	5.99703	5.9248	5.63238	0.0336326	0.0439148	0.0674355	5.63937	5.67412	5.84218	0.01455	0.614823	0.133773	6.25636	6.25495	6.30704	0.128362	0.142966	0.245819	6.32479	6.23912	6.26183	0.151213	0.107538	0.261274	6.00047	5.96326	5.97958	0.0633693	0.0596421	0.0359843	5.51505	5.46656	5.42189	6.01019	5.99034	6.06455	0.649839	0.572288	0.542784	6.1022	6.07727	6.13039
ENSMUSG00000087166	L1td1	1.88545	1.99295	1.94987	2.02666	2.18049	2.16096	2.56801	2.75826	2.69173	1.44776	1.81763	1.47154	2.27943	2.24541	2.04974	2.22186	1.89937	1.74583	2.1629	2.26822	2.16226	1.98528	1.81941	1.71381	1.26326	1.23071	1.48397	1.29361	1.07274	1.1963	0.99052	1.05463	1.23785	1.17481	1.40491	1.1751	0.737091	0.796564	0.694179	1.28167	1.22356	1.37646	1.85893	1.89931	1.68455	0.963003	1.17089	0.884712
ENSMUSG00000089824	Rbm12	6.31844	6.50622	6.27197	6.38754	4.8701	6.23924	6.34257	6.44059	6.1876	6.22951	6.25927	6.12584	6.3778	6.4148	6.61071	5.79722	6.24138	6.31299	5.79336	5.77083	5.80626	5.83464	5.74688	5.62671	5.80312	5.72846	5.62175	5.71357	5.56816	5.6017	5.73214	5.7296	5.85707	5.71828	5.76989	5.69009	5.89686	5.69965	5.77312	6.00326	5.78591	5.81133	6.1386	5.74794	5.39435	5.6769	5.86503	5.65848
ENSMUSG00000090553	Snrpe	8.40371	8.53208	8.56196	8.69196	9.60017	9.02871	8.65215	8.65778	8.85097	8.85575	8.88173	8.85747	8.50577	8.49798	8.51812	8.67774	8.76965	9.00533	8.95408	8.88011	9.00817	8.8468	8.97242	9.02521	9.05747	9.07977	9.15836	8.93663	9.00718	9.11459	9.08565	9.10156	9.14207	9.01342	8.86733	9.23235	8.98239	8.90482	8.94986	8.24384	8.33708	8.21374	7.72122	7.88354	7.8187	8.43188	8.4005	8.25116
ENSMUSG00000090862	Rps13	4.43435	3.88023	4.2281	3.41097	4.65757	3.37078	4.26275	4.08376	4.09013	3.77161	3.7629	4.26515	4.39721	3.85824	4.03155	3.58022	3.70593	2.94201	3.86258	3.82531	3.81674	3.85448	3.8681	3.77951	4.09049	3.81759	4.36652	3.8113	3.86502	4.31954	4.05607	3.9763	3.91616	3.58745	4.02894	3.85698	3.62444	3.91222	4.14166	5.33035	5.16655	5.15046	4.84265	4.67259	4.86227	5.4082	5.24439	5.33566
ENSMUSG00000090919	Pabpc4l	4.06844	4.09095	4.04271	3.63216	2.92991	3.54185	3.53151	3.60077	3.62493	4.1016	4.02236	4.20115	3.74512	3.92617	3.86197	4.18264	3.99884	4.16927	3.92013	3.76563	3.73062	4.24629	4.07269	4.12392	3.81991	3.53702	3.74995	4.17973	4.09051	4.18947	3.76479	3.85709	4.00073	4.6368	4.56326	4.53676	3.834	3.72142	3.55829	3.83853	3.48599	3.57685	4.1872	4.05984	3.49231	3.4094	3.73287	3.39056
ENSMUSG00000091625	Lsm5	4.26001	4.28003	4.07077	4.66464	5.3144	4.77051	3.92573	3.99759	4.61775	4.63402	5.43181	5.05099	3.60663	3.98794	3.70812	4.60839	4.70771	5.12119	4.79806	4.67814	4.77205	5.09649	5.26067	5.38801	4.91411	4.98042	5.07939	5.18656	5.12401	5.47545	4.91962	4.83193	5.09203	5.25838	5.20411	5.56929	5.3387	5.29397	5.24686	3.70921	4.14815	3.9486	3.60869	4.23936	3.85863	4.28454	4.04157	4.36975
ENSMUSG00000093661	Eif4e3	3.65391	3.88277	3.83306	4.06483	4.14124	4.20522	3.59617	3.72547	3.77782	3.92468	3.84379	3.8907	3.41508	3.40111	3.40533	3.75937	3.89914	3.94939	3.47319	3.46823	3.61407	4.34067	4.27735	4.17308	3.4569	3.51588	3.54458	4.12311	3.92988	4.03698	3.23396	3.1452	3.2514	4.29484	4.10876	4.19412	4.37972	4.2686	4.20044	3.33361	3.17941	3.23342	4.25221	4.33318	4.29434	3.05094	3.10254	3.25009
ENSMUSG00000093674	Rpl41	12.61	12.7011	12.7763	12.8942	13.4699	12.8839	12.6918	12.5292	12.2773	12.9161	12.2531	12.5624	12.5615	12.3385	12.6011	12.7577	12.6971	12.7422	12.0717	11.7714	12.0423	11.9281	12.2622	12.1366	12.1554	12.0897	11.9265	12.0899	12.1289	12.1904	12.1275	12.1167	12.0868	12.2236	11.9628	12.268	12.3106	12.1892	12.2211	12.4403	12.462	12.2991	12.0029	12.0461	12.1536	12.3811	12.4732	12.5167
ENSMUSG00000094483	Purb	5.20981	5.24889	5.15283	5.26449	4.8995	5.33756	5.57053	5.66671	5.83069	5.10019	5.15458	5.18033	5.55216	5.53491	5.43644	5.1953	5.2824	5.26618	6.11458	6.17838	6.07012	5.23045	5.05801	5.09528	5.94292	5.99844	6.06036	5.18583	5.04023	5.09551	5.95948	5.96935	5.91242	5.03319	5.2114	5.04483	5.12719	5.21853	5.13718	5.91322	5.80883	5.83734	5.03533	4.92982	4.98397	5.80789	5.50638	5.72418
ENSMUSG00000095567	Noc2l	7.29366	7.34158	7.28294	7.35884	7.433	7.3697	7.27787	7.19873	7.10536	7.33569	7.23393	7.23454	7.04291	7.08948	7.10752	7.63863	7.39086	7.39637	6.86293	6.79447	6.92735	6.35712	6.49314	6.34494	6.98397	6.9472	6.78522	6.57837	6.46051	6.56525	6.91698	6.93515	6.92471	6.50496	6.44252	6.52306	6.98617	6.97977	6.91983	6.88152	6.92977	6.97373	6.36239	6.38821	6.4489	7.04194	6.99521	7.04719
ENSMUSG00000096025	Ralyl	2.15811	1.52877	1.49755	0	0	0	0	0	0.71938	0	0	0	0	0.96198	0.658936	0	0	0	1.22917	1.28247	0.807178	0.41848	0.750991	0.378193	1.20008	1.09886	1.10855	0	0	0	0.668149	0.460419	0	0.433592	0	0.401959	3.37619	3.32794	2.4823	2.33348	1.87464	2.44159	0.565565	1.04804	1.03979	1.66881	2.14443	1.9021
ENSMUSG00000098274	Rpl24	6.20302	6.42558	6.35685	6.57796	6.83286	6.48235	6.47967	6.75328	6.42224	6.78628	7.26309	6.62929	6.17766	6.2986	6.30874	6.21442	6.43808	6.86234	6.97709	6.73696	7.00414	6.8722	6.98708	6.67124	7.08385	7.26228	7.23994	7.00364	6.88852	6.83335	7.10763	7.07289	7.12839	7.0838	6.71299	6.90316	7.01081	6.96286	6.91768	6.12445	6.34774	6.33209	5.74946	6.00363	5.88245	6.16255	6.17882	6.24656
ENSMUSG00000102252	Snrpn	5.57857	5.7291	5.71972	5.35149	5.37254	5.3309	5.83848	5.82263	5.72749	5.2445	5.24388	5.20875	5.59001	5.64065	5.69683	5.31283	5.17633	5.24379	5.17878	5.13143	5.26266	4.52045	4.52047	4.53698	5.16202	5.05129	5.13632	4.3904	4.36126	4.38675	5.12239	5.13232	5.1359	4.71883	4.55753	4.56249	5.43238	5.35119	5.36686	5.04395	5.12202	5.08483	4.25787	4.222	4.43942	4.69844	4.78004	4.90683
ENSMUSG00000102976	Zc3h11a	6.90049	7.0495	6.93814	6.81291	NA	6.68069	7.3841	7.45588	7.52759	6.75486	6.83383	6.75024	NA	7.56856	7.4849	NA	6.77338	6.71334	7.90122	7.95846	7.89418	7.10447	7.01421	6.86807	7.78074	7.89118	7.78619	7.00695	6.93907	6.87282	7.78266	7.85184	7.79613	6.94523	7.13459	6.85106	6.92882	6.95069	6.87949	7.60959	7.68517	7.73177	7.02064	6.9337	7.14172	7.48178	7.34183	7.55567
ENSMUSG00000103104	Riok2	5.41947	5.3414	5.35111	5.58382	5.5245	5.66079	5.49946	5.46599	5.56265	5.57852	5.66746	5.66949	5.43402	5.47162	5.46646	5.75649	5.78326	5.85948	5.34491	5.2955	5.43295	5.15829	5.0881	4.99665	5.4619	5.36583	5.46159	5.28	5.10961	5.27138	5.4169	5.34923	5.50552	5.27827	5.20931	5.23962	5.27827	5.18636	5.15398	5.23377	5.03963	5.04269	4.96263	4.99448	4.82225	5.26054	5.24064	5.04459
ENSMUSG00000104300	DHX30	3.39656	3.42169	3.65765	3.62699	2.70256	3.81768	3.55148	3.42355	3.36271	3.45888	3.46684	3.47015	3.05084	3.3478	3.23331	3.03632	3.13238	3.61851	3.21908	3.07382	3.06466	2.8966	3.26289	2.96583	3.31876	2.95174	3.26338	3.22778	2.68794	2.73979	3.12036	3.24912	3.13188	2.99447	2.67924	2.77784	2.81273	3.29235	3.3119	3.14095	2.75714	2.67725	2.39122	2.49818	2.00037	3.15156	3.12912	3.12138
[truncated: 22 more columns]
