# Supplementary material for: An Alternative Splicing Program for Mouse Craniofacial Development
Source: Front Physiol. 2020 Sep 4;11:1099. doi: 10.3389/fphys.2020.01099 (PMC7498679; doi:10.3389/fphys.2020.01099)
Supplement: Supplementary file 11 [file Table_11.xlsx]

## Sheet: SR_nature12270_zcchc24_log2expr
	E10.5_FNP_ecto_1	E10.5_FNP_ecto_2	E10.5_FNP_ecto_3	E10.5_FNP_mesen_1	E10.5_FNP_mesen_2	E10.5_FNP_mesen_3	E10.5_MdP_ecto_1	E10.5_MdP_ecto_2	E10.5_MdP_ecto_3	E10.5_MdP_mesen_1	E10.5_MdP_mesen_2	E10.5_MdP_mesen_3	E10.5_MxP_ecto_1	E10.5_MxP_ecto_2	E10.5_MxP_ecto_3	E10.5_MxP_mesen_1	E10.5_MxP_mesen_2	E10.5_MxP_mesen_3	E11.5_FNP_ecto_1	E11.5_FNP_ecto_2	E11.5_FNP_ecto_3	E11.5_FNP_mesen_1	E11.5_FNP_mesen_2	E11.5_FNP_mesen_3	E11.5_MdP_ecto_1	E11.5_MdP_ecto_2	E11.5_MdP_ecto_3	E11.5_MdP_mesen_1	E11.5_MdP_mesen_2	E11.5_MdP_mesen_3	E11.5_MxP_ecto_1	E11.5_MxP_ecto_2	E11.5_MxP_ecto_3	E11.5_MxP_mesen_1	E11.5_MxP_mesen_2	E11.5_MxP_mesen_3	E11.5_Nasal_epi_1	E11.5_Nasal_epi_2	E11.5_Nasal_epi_3	E12.5_FNP_ecto_1	E12.5_FNP_ecto_2	E12.5_FNP_ecto_3	E12.5_FNP_mesen_1	E12.5_FNP_mesen_2	E12.5_FNP_mesen_3	E12.5_MdP_ecto_1	E12.5_MdP_ecto_2	E12.5_MdP_ecto_3	E12.5_MdP_mesen_1
Bicc1	2.15676	2.208	2.20198	3.1604	2.42126	3.12764	2.35541	2.39502	2.28896	3.482	3.50018	3.35316	2.12255	2.06758	2.10449	3.02409	3.03348	3.03399	2.31996	2.46463	2.43826	4.14861	4.08984	3.91548	2.22337	2.32651	2.19907	4.47898	4.2531	4.18557	2.15288	2.14006	2.0441	3.85411	3.8553	3.61144	2.22687	2.2793	2.04711	2.05183	2.07626	1.9096	5.06757	5.06629	4.86854	1.7197	1.82632	1.62501	5.0297
Celf2	5.06939	5.30061	5.15428	2.40729	1.31983	2.72835	5.05922	5.3622	5.31027	2.52892	2.62064	2.70984	5.36586	5.42631	5.51033	1.83792	2.87053	3.12733	5.05385	5.06876	4.87468	3.28112	3.09534	2.917	5.36355	5.37285	5.18175	4.13334	3.8167	3.35274	5.41607	5.4012	5.28907	3.28655	3.36369	3.04903	5.14299	5.26268	5.14127	4.89226	4.91402	4.94584	3.80037	4.03173	3.86857	5.60304	5.63598	5.62734	3.74667
Celf3	3.65511	3.5461	3.62377	1.31453	0.990344	1.2054	0.0562417	0	0	0.132204	0.346745	0.23361	0.0379501	0.0278451	0.0262591	0.249846	0.905376	0.214296	0.348493	0.470554	0.427332	0.444206	0.328333	0.526961	0.0135578	0.0441517	0.0601765	0.129177	0.0952295	0.162688	0.0481677	0.0728239	0.0147676	0.250173	0.212978	0.0695883	4.8814	4.74345	4.65777	0.102962	0.139641	0.060377	1.03058	1.69935	0.957891	0.0284568	0.0398543	0	0.00979094
Celf4	2.04755	2.03899	2.16403	1.2731	1.68114	1.37002	1.76432	1.75313	1.79827	1.24475	1.0984	1.25501	1.99944	1.85747	1.83812	1.24166	1.35972	1.33463	2.31381	2.33447	2.4043	1.60425	1.5101	1.3643	2.32455	2.30302	2.28309	1.5966	1.37314	1.37255	2.34981	2.19631	2.23221	1.69718	1.41532	1.42341	2.47885	2.61933	2.49486	2.34219	2.43576	2.47033	2.0269	2.17029	2.1761	2.2561	2.32405	2.47831	1.8305
Celf5	1.34754	1.04089	1.48748	0.880567	1.27178	0.640606	0.47921	0.405269	0.240539	0.538253	0.440608	0.371243	0.50804	0.569146	0.491371	0.793165	0.407383	0.507158	0.731593	0.4749	0.34096	1.49978	1.31748	1.23286	0.365612	0.440466	0.230727	0.823868	0.497738	0.708236	0.238861	0.413734	0.347911	1.13391	0.964543	0.825496	1.94511	1.96776	1.75358	0.267875	0.429756	0.395115	1.63937	1.84384	1.9735	0.403221	0.348082	0.548111	1.3268
Celf6	0.49755	0.285227	0.348499	0.0878215	0.177015	0.135453	0.034572	0.0442931	0.0149394	0.267183	0.0278751	0.0278946	0	0.041234	0.0139101	0	0.146885	0	0.110431	0.0908444	0.149745	0.243271	0.281937	0.146183	0.204559	0.031206	0.0279216	0.0782592	0.0391606	0.0516231	0	0	0	0.0695937	0	0.128762	1.47859	1.50525	1.38109	0.0278697	0.222103	0.0636201	0.172838	0.411921	0.361355	0.0150756	0	0.0948245	0.0693145
Elavl2	4.85688	5.11013	5.12023	2.44919	1.25386	2.46574	2.66282	2.85515	3.05107	3.10057	2.88145	2.73232	3.78782	3.66444	3.67111	2.8092	3.65486	2.88155	2.78066	2.67393	2.82965	2.70732	2.35963	2.27745	2.34503	2.17694	2.49897	2.4525	2.2614	2.42284	2.67935	2.93372	2.96226	2.63228	2.3544	2.6117	5.56559	5.3324	5.27811	2.0891	1.94281	1.93777	2.22759	2.4037	2.06623	1.81375	1.65013	1.47131	1.75958
Elavl3	4.45171	4.60872	4.65195	1.53165	1.60276	1.39074	0.0928838	0.0488615	0.0631771	0.0985629	0.0822235	0.105272	0.188798	0.186873	0.228372	0.725275	1.64322	0.264823	0.357445	0.44426	0.435678	0.556154	0.353884	0.545836	0.0202853	0.0659933	0.0468835	0.0934516	0.160643	0.196973	0.0726201	0.138425	0.116015	0.462535	0.297305	0.201587	5.84137	5.80261	5.67526	0.140861	0.170257	0.130891	1.30824	1.9214	1.18955	0.04968	0.0593388	0.053162	0.0790692
Elavl4	5.53201	5.5339	5.69462	2.42091	2.25464	2.36768	0.669446	1.305	0.964043	1.37536	1.32327	1.29832	0.939868	1.12365	1.00786	1.68424	2.57688	1.56318	1.66839	1.2586	1.22638	1.37759	1.24088	1.51947	1.06789	0.972506	0.906892	1.42509	1.45761	1.72368	1.45423	1.00362	1.01141	1.76631	1.53608	1.33402	6.44533	6.30592	6.15624	1.22037	1.02269	0.905938	2.21891	2.37799	1.90848	0.670651	0.719926	0.781424	1.62021
Esrp1	6.81016	6.82694	6.76832	0.549041	0.27838	0.609558	6.99725	6.98213	6.9087	0.190458	0.354579	0.295848	6.83568	6.84964	6.87789	0.600485	0.846472	0.141981	7.2717	7.24897	7.25295	0.266195	0.151004	0.38995	7.36566	7.31081	7.32211	0.121777	0.12862	0.244749	7.20562	7.17875	7.18232	0.225543	0.140814	0.146567	6.94654	6.9219	6.92342	6.97041	7.0043	7.09676	1.30591	1.63833	1.10152	7.04614	7.21128	7.19181	0.981135
Esrp2	5.07733	4.98219	5.1159	0.255768	0.106842	0.0824034	5.99703	5.9248	5.63238	0.0336326	0.0439148	0.0674355	5.63937	5.67412	5.84218	0.01455	0.614823	0.133773	6.25636	6.25495	6.30704	0.128362	0.142966	0.245819	6.32479	6.23912	6.26183	0.151213	0.107538	0.261274	6.00047	5.96326	5.97958	0.0633693	0.0596421	0.0359843	5.51505	5.46656	5.42189	6.01019	5.99034	6.06455	0.649839	0.572288	0.542784	6.1022	6.07727	6.13039	0.378315
Hnrnpa1	6.29782	6.36439	6.51466	6.68242	6.91236	6.64485	6.00821	6.26347	6.28705	6.75636	7.18361	6.79983	6.27351	6.36532	6.26622	6.32119	6.64593	6.81156	7.13882	6.95929	7.01254	7.40634	7.28791	7.20665	7.05783	7.21273	7.0891	7.3747	7.20396	7.33024	7.13532	7.17812	7.14949	7.44694	7.38808	7.37107	7.22644	7.26282	7.18894	6.07803	6.10994	6.25403	6.17256	6.30546	6.28036	6.14812	6.13747	6.28611	6.19287
Isy1	5.83291	5.70594	5.65521	6.12953	6.3915	6.18474	5.62624	5.73249	5.69676	6.21064	6.47978	6.23287	5.50999	5.58757	5.43482	6.63082	6.34398	6.35299	5.50171	5.43056	5.55363	5.93773	6.05581	5.93518	5.61693	5.59032	5.63543	5.99915	5.97746	6.04152	5.6431	5.61819	5.7246	6.10152	6.0507	6.13404	5.7217	5.76305	5.72553	5.24236	5.18805	5.14345	5.47	5.65377	5.52549	5.43235	5.40629	5.26617	5.60369
Khdrbs3	7.34503	7.43504	7.3385	5.43687	5.65759	5.52789	6.61325	6.65337	6.61549	5.21529	5.30615	5.04089	6.91461	7.11568	6.99694	5.39963	5.09419	5.14728	5.83393	5.75996	5.92458	5.32134	5.37175	5.19315	6.12563	6.15027	6.10698	5.43599	5.20035	5.19918	5.98428	6.03089	6.18684	5.43648	5.2997	5.37385	6.86871	6.88033	6.87576	5.12772	5.29651	5.26775	5.20971	5.23346	5.2625	5.78121	5.77331	5.70123	5.90505
Lsm2	7.98938	7.9197	7.78649	8.3399	8.3049	8.29968	8.02145	7.97288	7.55672	8.29286	8.18096	8.17749	7.64536	7.44382	7.8953	8.23182	8.21407	8.34693	7.03332	7.01389	7.1057	7.0855	7.26359	7.18592	6.9979	7.19641	7.03014	7.14326	7.12875	7.27382	7.13247	7.09746	7.06644	7.26223	7.30232	7.3622	7.04	7.09145	7.05659	7.02088	7.01653	6.92463	6.90471	6.685	7.02896	6.83849	6.86953	6.97474	6.70914
Lsm5	4.26001	4.28003	4.07077	4.66464	5.3144	4.77051	3.92573	3.99759	4.61775	4.63402	5.43181	5.05099	3.60663	3.98794	3.70812	4.60839	4.70771	5.12119	4.79806	4.67814	4.77205	5.09649	5.26067	5.38801	4.91411	4.98042	5.07939	5.18656	5.12401	5.47545	4.91962	4.83193	5.09203	5.25838	5.20411	5.56929	5.3387	5.29397	5.24686	3.70921	4.14815	3.9486	3.60869	4.23936	3.85863	4.28454	4.04157	4.36975	4.0548
Lsm6	7.5308	7.26685	7.33456	7.73196	8.41655	7.81662	7.42937	7.43806	7.52077	7.7452	8.03712	7.86262	7.32399	7.38923	7.35696	8.10308	7.88974	8.04255	6.79815	6.7667	6.92011	7.24637	7.42049	7.22089	6.9379	6.83281	6.9847	7.37315	7.20126	7.42355	7.02411	6.92567	7.17841	7.3083	7.18394	7.34623	7.02912	7.03429	7.06214	7.01821	7.07059	7.14934	7.22159	7.25108	7.38759	7.13762	7.09885	7.05724	7.21037
Lsm7	3.4591	2.88317	3.47514	3.27663	4.02075	2.68717	3.0641	3.1828	2.87536	3.26056	2.971	3.02126	3.27146	2.81896	3.19698	3.44392	2.45571	2.60248	3.01891	2.6447	2.50768	2.85081	2.95676	2.79114	3.04284	2.59673	2.86435	2.89608	3.00852	3.04254	2.87052	2.68399	2.55983	3.07763	2.99214	3.18749	2.35998	3.0067	3.29436	3.50224	3.26395	3.43992	3.53843	3.32529	3.75222	3.63519	3.48943	3.35019	3.36125
Mbnl1	3.48722	3.72693	3.62777	4.54096	3.80345	4.46154	3.89847	4.15039	4.34784	4.43894	4.43283	4.48208	4.09719	4.13523	3.94768	4.07196	4.29931	4.41785	4.98043	5.05663	4.94299	4.77612	4.49534	4.49441	4.74346	4.76996	4.79073	4.5814	4.45759	4.52181	4.96533	4.80641	4.68044	4.79008	4.62226	4.44012	3.57166	3.48517	3.41638	5.50494	5.34363	5.50939	5.35634	4.95599	4.93052	5.171	5.15801	5.31057	4.81159
Mbnl2	4.94071	4.98752	4.89956	4.94919	4.66867	4.92392	5.50569	5.65032	5.75285	4.60956	4.62618	4.62743	5.49482	5.48219	5.61684	4.36648	4.61897	4.64133	6.07138	6.04881	6.07872	5.32051	5.11059	4.98494	6.03851	6.05178	5.97298	5.04679	4.80197	4.82958	5.94543	5.85851	5.83826	5.04787	4.8985	4.80564	5.3992	5.37969	5.25763	6.19658	6.1196	6.18305	5.92386	5.85135	5.91986	6.04038	5.99877	6.1675	5.59103
Mbnl3	3.30945	3.3486	3.23991	2.73215	1.94117	2.83457	3.54097	3.59046	3.66388	3.84997	3.73662	3.78031	3.40867	3.4825	3.28735	3.45458	3.1095	3.35268	4.22266	4.35454	4.07006	3.28732	3.324	3.61117	4.3351	4.21465	4.10288	4.29944	4.19439	4.28915	4.37972	4.26171	4.00743	3.35652	3.64681	3.30143	3.48242	3.46892	3.50522	4.22443	3.99405	4.07438	3.05438	3.04158	2.53675	4.18533	4.00327	3.97453	3.73312
Mex3b	5.55907	5.46137	5.51635	6.67384	6.30558	6.65384	5.35055	5.22258	5.18102	6.15626	6.14252	6.17423	5.2992	5.2304	5.38745	6.28704	6.31083	6.37171	5.16439	5.21939	5.41153	6.88777	7.03223	6.74451	5.00074	5.399	5.30699	6.59927	6.4655	6.60154	5.29843	5.46346	5.38179	6.62677	6.59591	6.68183	5.49071	5.56877	5.54338	4.58386	4.67501	4.44416	6.6708	6.70194	6.3703	4.29543	4.40301	4.31135	6.44627
Msi1	7.59619	7.56657	7.51208	7.17057	6.60735	7.09319	6.64834	6.54081	6.28538	6.7257	6.79901	6.69304	6.78888	6.75608	6.9392	7.0465	6.98452	6.98168	6.32778	6.22056	6.36198	6.58382	6.59093	6.42914	6.44161	6.45516	6.21985	6.28361	6.10898	6.26867	6.38308	6.44724	6.46848	6.5627	6.54753	6.5002	7.63278	7.61783	7.53139	5.9793	6.05708	5.94922	5.96452	6.15301	6.11175	5.9515	5.87372	6.09069	5.91543
Msi2	5.91672	6.1696	6.10201	5.8268	4.97032	6.02278	6.02694	6.24227	6.35395	6.09051	6.50129	6.18706	6.1098	6.16601	6.18524	6.04543	6.28995	6.49981	6.29305	6.14117	6.03119	5.77321	5.71026	5.5549	6.51199	6.66914	6.54168	5.72196	5.80753	5.71804	6.61481	6.53369	6.50325	5.53695	5.77742	5.64352	6.38223	6.34447	6.14813	6.04455	6.13473	5.9894	5.486	5.59688	5.21769	6.16671	6.29326	6.35107	5.1454
Nova1	1.77677	1.94919	1.84127	1.88269	2.02381	1.9708	1.59341	1.63741	1.60898	1.81513	1.82096	1.73529	1.72513	1.59044	1.75805	1.76652	1.86292	1.71433	1.34209	1.2556	1.29278	2.23782	2.04371	2.12037	1.78283	1.73401	1.67148	1.98235	1.90233	1.95056	1.70146	1.58241	1.54846	2.23035	2.25329	2.20785	1.46641	1.52999	1.55137	1.61492	1.59253	1.60764	2.51431	2.35773	2.56382	1.98509	2.04932	2.00327	2.19188
Nova2	1.48932	1.42416	1.35697	1.28077	0.979488	1.12394	0.419651	0.430436	0.329516	1.02148	0.94364	1.01698	0.497999	0.421727	0.496836	1.09248	1.15944	1.08449	0.223451	0.333166	0.302409	1.34346	1.32914	1.14066	0.293415	0.274485	0.228468	1.1203	1.11116	1.05619	0.192996	0.255203	0.200914	1.30368	1.43458	1.23138	1.39479	1.45511	1.38023	0.0878157	0.0942638	0.146488	1.30992	1.28107	1.33584	0.169512	0.146715	0.189155	1.28389
Pcbp3	4.55518	4.63658	4.32478	5.09577	4.89544	4.96166	4.29813	4.15331	4.15555	5.0375	4.79339	4.71961	4.16295	4.20324	4.14573	4.88439	4.79781	4.41907	3.24588	3.27873	3.32345	4.76379	4.66317	4.64532	3.43591	3.6465	3.38726	4.44364	4.57163	4.49626	3.6011	3.6368	3.62357	4.5087	4.43082	4.34691	4.2798	4.16528	4.08711	3.34451	3.47753	3.64794	4.6721	4.29121	4.58681	3.48837	3.62304	3.56156	4.25571
Pcbp4	9.08023	8.88479	8.94423	8.47781	8.38608	8.3452	8.57167	8.29982	8.03888	8.2979	8.04349	8.0354	8.51065	8.39243	8.59588	8.24681	8.16145	8.03794	7.7672	7.66461	7.93143	7.9878	8.22462	7.94957	8.04263	8.12611	8.02044	7.94673	7.84923	8.01431	8.08471	8.15304	8.21399	8.04909	7.94104	8.07732	8.97933	8.97774	9.01938	7.62987	7.66563	7.56355	7.63584	7.79854	7.6353	7.73753	7.58005	7.81452	7.48182
Prpf40a	7.12258	7.3886	7.18539	7.56707	7.26534	7.63902	7.20709	7.32892	7.40611	7.54945	7.72199	7.62329	7.10966	7.34679	7.1833	7.97805	7.61692	7.79381	6.93533	6.77533	6.70754	6.98388	6.7909	6.78432	6.78782	6.83971	6.95719	6.8658	6.82287	6.86712	6.76496	6.80543	6.83591	6.89447	6.85614	6.76425	6.89926	6.88771	6.78737	6.61523	6.45751	6.47737	6.71249	6.54714	6.30191	6.43502	6.66445	6.4068	6.4589
Psip1	9.89588	10.0636	10.0402	8.89593	8.98546	8.97191	8.1655	8.34301	8.57935	8.8281	8.9406	8.95554	8.42284	8.48337	8.39486	8.96118	8.95817	9.13768	7.84288	7.8865	7.81166	8.57351	8.49831	8.47114	7.8747	7.9089	8.03705	8.47018	8.4501	8.51114	7.91187	7.96906	8.05923	8.61436	8.64643	8.69116	9.87533	9.90164	9.85956	7.78496	7.71718	7.64427	8.46359	8.32626	8.26989	7.84869	7.85418	7.72377	8.27059
Ptbp2	6.82516	6.84788	6.85232	7.3013	7.18501	7.40579	6.3369	6.37929	6.68066	6.96045	7.15788	7.11062	6.55144	6.60307	6.56587	7.24413	7.271	7.43981	6.21897	6.1336	6.24479	7.18824	7.15551	7.18319	6.14999	6.17387	6.3897	6.7512	6.7562	6.86646	6.28012	6.26851	6.40724	7.15268	7.03667	7.21189	6.50886	6.48779	6.50993	5.8004	5.68597	5.85651	6.60703	6.59745	6.62691	5.82789	5.76484	5.73446	6.21232
Qk	6.59606	6.79438	6.75874	7.31583	6.93953	7.35433	6.58022	6.75656	6.85079	7.21546	7.25122	7.23098	6.69916	6.67456	6.73775	6.97487	7.19845	7.30493	6.98342	6.94657	6.98701	7.37744	7.25849	7.27957	6.76017	6.74555	6.87598	7.26593	7.23486	7.2588	6.86964	6.84875	6.81774	7.3418	7.32286	7.29815	6.57653	6.61625	6.57893	6.84103	6.61277	6.66913	7.27762	7.20433	7.11068	6.53171	6.54463	6.50647	7.11573
Ralyl	1.21207	1.83765	1.51031	0.101097	0.316271	0.436803	0.294784	0.410476	0.329346	0.757513	0.702409	0.648348	0.484293	0.979872	0.667384	0.29928	0.518122	0.463783	0.897312	0.962057	1.35332	0.593055	0.732808	0.6607	0.779426	0.666164	0.349347	0.333218	0.192147	0.310038	0.279849	0.776214	0.197791	0.818212	0.30677	0.358047	2.66	2.47147	2.30464	1.28086	1.29932	1.18188	0.803568	0.629372	0.627165	1.06539	1.28029	1.14078	1.34068
Ralyl.1	2.15811	1.52877	1.49755	0	0	0	0	0	0.71938	0	0	0	0	0.96198	0.658936	0	0	0	1.22917	1.28247	0.807178	0.41848	0.750991	0.378193	1.20008	1.09886	1.10855	0	0	0	0.668149	0.460419	0	0.433592	0	0.401959	3.37619	3.32794	2.4823	2.33348	1.87464	2.44159	0.565565	1.04804	1.03979	1.66881	2.14443	1.9021	1.62923
Raver2	5.29558	5.38428	5.39123	3.90994	3.70152	3.92234	4.41403	4.47261	4.40292	3.92708	3.81109	3.91169	4.45962	4.42921	4.61718	3.49714	3.60615	3.67773	4.47321	4.40419	4.47285	4.40837	4.38744	4.13832	4.51999	4.54494	4.40141	4.33581	4.14051	4.21165	4.51391	4.48265	4.44954	4.22945	4.16898	4.07678	5.35331	5.2841	5.2347	4.44625	4.32666	4.33332	4.64437	4.65775	4.65657	4.43725	4.65568	4.62919	4.33446
Rbfox1	0.368135	0.453036	0.423848	0.541395	0.250433	0.335343	0.484515	0.196457	0.13385	0.802901	0.922549	0.984211	0.510393	0.428216	0.387078	0.558963	0.555392	0.350988	0.417769	0.393773	0.372443	0.509038	0.381892	0.387481	0.536873	0.560968	0.655799	0.933524	0.79495	0.734551	0.622717	0.526565	0.46926	0.471603	0.370006	0.318028	0.299168	0.373048	0.419953	0.68338	0.600678	0.638251	0.503359	0.488098	0.500923	0.51868	1.04932	0.840551	0.985193
Rbfox2	5.62016	5.6673	5.61982	6.19389	5.68706	6.21213	5.70151	5.73377	5.71205	6.101	6.13792	6.06022	5.80134	5.80128	5.79541	6.16271	6.15908	6.14971	5.89043	5.83423	5.84495	6.67202	6.6476	6.54155	6.06338	6.09916	6.09755	6.63967	6.50034	6.50267	6.08217	6.08853	6.05882	6.48724	6.62796	6.4633	6.01746	6.01999	5.91967	5.64513	5.6529	5.65122	6.57426	6.52331	6.53677	5.7354	5.75921	5.73278	6.53421
Rbm10	6.50238	6.3792	6.35584	6.4723	5.97123	6.39714	6.57962	6.30424	6.14823	6.58846	6.62191	6.40379	6.19337	6.24019	6.30905	6.74619	6.54914	6.53914	5.71269	5.6872	5.69878	6.17944	6.35244	6.05825	5.87035	5.8492	5.62574	6.27696	6.13238	6.22955	5.90589	5.95018	5.85409	6.28894	6.20106	6.26162	6.17305	6.19927	5.97085	5.42231	5.46469	5.46349	5.93093	5.94075	5.8706	5.4764	5.58966	5.59291	5.91422
Rbm15	4.15031	3.84115	3.96874	4.04569	3.09893	3.99104	4.08465	3.90749	3.90564	3.99128	4.01004	4.00529	3.77954	3.72771	3.79862	4.27327	3.9853	3.84386	3.56733	3.64155	3.58702	3.99579	4.07409	3.96328	3.60758	3.74025	3.61696	3.92892	4.01863	3.91848	3.59343	3.77264	3.68185	3.94392	4.22936	3.95387	3.9063	3.92512	3.75649	2.90039	2.85812	2.86595	3.47364	3.44299	3.01122	3.15356	2.98141	2.92956	3.55616
Rbm18	5.44338	5.58146	5.58695	5.72323	5.74377	5.8113	5.30331	5.31031	5.48597	5.93795	5.89263	5.95992	5.32441	5.38526	5.42959	6.09602	6.3955	6.4288	5.67458	5.57466	5.58871	5.94401	5.83301	5.76505	5.6478	5.5105	5.62046	6.11128	5.95033	5.98063	5.62084	5.61646	5.58261	6.38768	6.32617	6.23268	5.94888	5.87527	5.77566	5.43038	5.36426	5.42689	5.66545	5.69693	5.75171	5.30431	5.3937	5.28573	5.83094
Rbm20	1.23136	1.08432	1.2846	0.365174	0.366096	0.347967	2.83067	2.9252	2.75511	0.92094	0.496067	0.509177	2.54363	2.59538	2.60943	0.583816	0.514031	0.39427	2.17778	2.36405	2.2495	0.716469	0.424915	0.451732	2.50498	2.6285	2.38291	1.58333	1.43179	1.21692	2.38473	2.19295	2.14476	0.849967	0.886538	0.920656	1.50744	1.65334	1.4805	2.21012	2.31824	2.28202	1.25	1.1664	1.34659	2.20581	2.27507	2.39746	1.34163
Rbm24	3.71953	3.66438	3.80008	0.250097	0.430581	0.414323	1.32174	1.25598	1.14322	0.680965	0.877154	0.888814	1.08852	1.0382	0.96106	1.04381	0.928445	0.773577	0.906791	1.03365	0.984707	0.400991	0.330309	0.310944	0.563995	0.657229	0.680093	2.79189	2.39398	2.15485	0.441846	0.478512	0.62955	0.515142	0.361232	0.36049	4.76108	4.69023	4.51879	0.467975	0.483675	0.390315	0.669259	1.01525	0.749513	0.28568	0.421616	0.357606	0.712895
Rbm38	7.04467	7.01222	7.00419	7.09592	6.35903	6.91734	7.0052	6.99533	6.58682	6.86301	7.00458	6.76122	6.8005	6.77742	7.19092	6.39151	6.76014	6.86993	5.90535	5.58814	5.74209	5.1936	5.28767	5.24452	5.90977	5.7266	5.54079	5.6032	5.63577	5.60676	5.88851	5.91344	5.78579	5.38028	5.32194	5.40835	5.82917	5.85	5.90171	5.9495	5.92781	6.04636	5.47903	5.27932	5.25704	5.99299	6.03814	5.95584	5.3214
Rbm43	2.90456	3.00701	2.89571	3.00693	2.96094	3.0976	3.05524	2.94402	3.26567	2.98437	2.87483	3.06453	3.70713	3.71573	3.7808	3.0803	3.14877	3.12503	3.61605	3.5918	3.51249	3.68952	3.70594	3.5656	3.26052	2.97849	3.23394	3.19269	3.19214	3.22972	3.80915	3.88206	3.85091	3.13381	3.06604	3.09176	3.09785	3.0393	2.93444	3.71181	3.70541	3.70603	3.5093	3.55025	3.56263	3.63278	3.54397	3.53131	3.24448
Rbm44	0.405423	0.277343	0.280911	0.805825	0.609186	0.752667	0.354322	0.380963	0.761015	0.970581	0.902209	0.68902	0.44741	0.494078	0.754357	0.557903	0.694565	0.982846	0.503184	0.440731	0.769048	1.07432	0.609632	0.689793	0.39642	0.360423	0.388258	1.25418	0.909652	0.828693	0.484896	0.522704	0.478914	0.768996	1.00231	0.564507	0.425264	0.377401	0.217826	0.578439	0.598733	0.343627	0.841042	0.590638	0.828726	0.38589	0.674735	0.454355	0.873115
Rbm47	2.19405	2.12899	2.18922	0.485691	0.290098	0.152082	1.87273	1.80081	1.59208	0.111389	0.353347	0.20059	2.10792	2.19138	1.94229	0.467452	0.358855	0.321551	1.82992	1.78714	1.91608	0.506389	0.498035	0.395745	1.58333	1.87068	1.78738	0.360537	0.390607	0.236021	1.68802	1.75392	1.87125	0.262401	0.375295	0.186772	3.09379	2.97474	2.94911	1.6692	1.58439	1.76497	0.548631	0.560336	0.47872	1.59018	1.94352	1.88669	0.366353
Rbm4b	5.48866	5.52968	5.55265	5.65199	5.56537	5.68602	5.35292	5.38218	5.27802	5.73882	5.60303	5.57572	5.47463	5.46775	5.60341	5.47664	5.70904	5.78259	5.33951	5.40706	5.43265	6.04838	6.07733	5.9406	5.38605	5.52991	5.36186	5.94945	5.8071	5.89702	5.47952	5.49588	5.45207	6.11431	6.03747	6.08801	5.62269	5.60075	5.52081	5.06987	5.17971	5.09398	5.78068	5.97535	5.92139	5.07571	5.11641	5.09501	5.75697
Rbms1	6.07801	6.33522	6.19486	6.16923	5.58817	6.0794	6.83254	6.94335	6.77577	6.38426	6.37126	6.21102	6.82296	6.69204	6.92964	5.83912	6.10432	6.13687	6.98872	7.00386	7.05991	6.08347	6.01486	5.91447	6.67842	6.87386	6.70317	6.22976	6.21291	6.11952	6.78395	6.81564	6.79966	5.88893	5.939	5.8016	6.15518	6.1889	6.12508	6.70353	6.71243	6.72258	6.47593	6.23756	6.29687	6.41226	6.39443	6.55014	6.09995
Rbms3	1.8914	1.86012	1.79168	3.48789	2.80583	3.37212	3.3248	3.61462	3.48905	3.46344	3.74033	3.46873	3.16523	3.09574	3.23916	3.52601	3.4977	3.69621	3.59525	3.48979	3.16015	4.77205	4.6446	4.41835	4.03853	4.10356	3.99096	4.69283	4.51891	4.39078	4.03782	4.03318	3.85418	4.73389	4.75962	4.5075	3.13682	3.12312	2.90683	4.17819	4.22032	4.295	5.40467	5.25213	5.20553	4.10867	4.20331	4.14311	5.34573
Rbmx	6.77219	6.86745	6.83486	7.05449	7.23757	7.09509	6.66836	6.79801	6.88089	7.06984	7.1692	7.09399	6.47461	6.5837	6.52075	7.14219	7.13735	7.2163	6.45572	6.38225	6.50124	7.28289	7.1475	7.12791	6.50605	6.47145	6.66144	7.14119	6.99501	7.16037	6.51829	6.50497	6.63539	7.46864	7.27144	7.32099	6.9437	6.86386	6.84282	6.66867	6.73678	6.78283	7.26739	7.2694	7.43217	6.7765	6.69552	6.88223	7.28049
Rbpms	6.25106	6.4315	6.34312	6.5349	6.32621	6.47282	7.04301	6.99459	6.84791	5.87466	5.72805	5.69678	6.58217	6.5979	6.76235	5.74557	5.86805	6.01154	5.63092	5.73922	5.98063	5.50033	5.54889	5.45107	5.28899	5.4809	5.53733	4.91615	4.81992	4.87041	5.43235	5.56708	5.53505	4.60796	4.61709	4.67177	5.3846	5.48265	5.50198	5.21666	5.03657	5.03743	5.01578	5.02715	5.01353	4.95778	4.87499	4.9527	4.37873
Rbpms2	2.6422	2.82653	2.61809	3.84394	4.03688	3.74717	2.56554	2.55575	2.48286	4.28583	4.07235	4.11907	2.40281	2.73604	2.53299	4.13931	3.94499	4.06172	0.675738	0.782663	0.830448	3.79221	3.90391	3.69707	1.56902	1.50574	1.33837	4.38404	4.17164	4.23426	1.36784	1.48017	1.45461	4.41303	4.22726	4.36305	1.98093	2.16011	2.10946	0.86351	0.965294	0.985919	3.59487	3.66447	3.60361	1.17408	0.934868	1.35206	3.74845
Sf3a3	7.14774	7.23091	7.09862	7.47326	7.69217	7.48995	7.16191	7.21588	7.25732	7.5475	7.70041	7.59753	6.9908	7.15953	6.96547	7.63672	7.5724	7.71878	6.95905	6.8924	6.98379	7.15572	7.19744	7.02816	7.01085	6.94909	6.99785	7.22404	7.0538	7.20358	6.97233	6.98404	7.1335	7.22182	7.15702	7.2307	7.05984	7.04554	6.94161	6.50404	6.61792	6.69084	6.57652	6.61368	6.72687	6.61577	6.74187	6.65071	6.57031
Sfpq	9.69711	9.89546	9.66387	10.1266	10.1314	10.0647	9.62564	9.85944	9.97526	10.0777	10.3431	10.1232	9.66124	9.8439	9.69213	10.3025	10.1377	10.2402	9.2124	9.29624	9.16064	9.64075	9.43698	9.3066	9.24323	9.1576	9.29502	9.40991	9.20316	9.35079	9.1804	9.20613	9.31973	9.47831	9.55695	9.51587	9.26831	9.27857	9.12145	9.19621	9.21919	9.27151	9.67771	9.43763	9.72005	9.411	9.42965	9.35501	9.39888
Snrpa1	6.97234	6.98061	6.97566	7.26956	7.81507	7.39996	6.96864	6.97466	7.08571	7.34886	7.44234	7.3736	6.76199	6.83477	6.71118	7.36573	7.38326	7.49427	6.88417	6.76401	6.88226	6.9078	6.99216	6.82968	6.9084	6.84239	6.81724	7.05261	6.91138	7.01353	6.97023	6.85553	7.01651	7.09639	6.84229	7.04047	6.99708	6.95436	6.86336	6.68308	6.7362	6.69084	6.38095	6.49515	6.567	6.81255	6.77988	6.80383	6.5713
Snrpb2	6.80275	7.11941	7.19853	7.45053	7.77041	7.76049	6.76362	6.96913	7.31669	7.42868	7.66184	7.71076	6.90664	7.06448	6.97731	7.5821	7.71223	7.92748	6.8408	6.63084	6.71787	7.23741	7.13735	7.07505	6.77581	6.67586	7.02835	7.29351	7.09165	7.31578	6.89506	6.76857	7.06391	7.27773	7.06597	7.44528	7.05593	7.02145	6.95744	6.74555	6.65567	6.69889	6.85949	6.8799	6.85353	6.87823	6.82087	6.63854	6.98102
Snrpc	7.09242	7.07049	7.00411	7.27228	7.146	7.27341	7.18784	6.8926	6.64238	7.35544	7.3088	7.08535	6.69351	6.65064	6.98274	7.16494	7.21054	7.40961	6.60504	6.57389	6.74286	6.95654	7.18302	6.9168	6.64917	6.85655	6.63824	7.00777	6.88653	6.90539	6.68615	6.74573	6.8252	7.1831	6.97208	7.11171	6.8654	6.84702	6.76101	6.23203	6.55847	6.40399	6.35845	6.67315	6.47546	6.28099	6.39544	6.552	6.49641
Snrpd1	8.52379	8.60637	8.4944	8.88898	9.37661	9.12951	8.63181	8.72842	8.88326	9.04287	9.43905	9.16214	8.46245	8.66867	8.53336	9.40723	9.09571	9.48863	8.36313	8.30662	8.40171	8.33946	8.46252	8.32171	8.42407	8.39637	8.47179	8.41929	8.35308	8.52056	8.43004	8.38509	8.6784	8.43719	8.35794	8.59813	8.2507	8.25805	8.16662	8.33094	8.40895	8.2977	8.08198	8.06373	8.16141	8.51163	8.44307	8.398	8.16218
Snrpd2	8.64169	8.82056	8.82886	9.03005	9.64651	9.12942	8.65871	8.76857	8.68545	9.09785	8.84337	8.95704	8.67904	8.57957	8.64902	8.9486	9.01383	8.99241	8.78866	8.57699	8.83439	8.72772	9.10542	8.92581	8.85817	8.67702	8.88869	8.97883	8.88107	9.0822	8.89351	8.88154	8.92648	8.99518	8.81944	9.21867	8.96044	8.96516	8.87515	8.46905	8.4694	8.53627	8.10137	8.31595	8.24102	8.68626	8.59311	8.4978	8.41781
Snrpd3	8.2019	8.1993	8.19642	8.64777	8.85253	8.73469	8.35075	8.33694	8.5073	8.60086	8.64467	8.77532	8.26362	8.46149	8.25819	8.97152	8.77017	9.01674	7.28035	7.22244	7.29355	7.22499	7.28976	7.10508	7.25864	6.97735	7.31711	7.26572	7.17417	7.35595	7.18523	7.26494	7.43709	7.23747	7.24304	7.35861	7.11719	7.09776	6.9638	7.90758	7.75067	7.68462	7.85912	7.60388	7.86499	7.96453	8.02221	7.75203	7.67298
Snrpe	8.40371	8.53208	8.56196	8.69196	9.60017	9.02871	8.65215	8.65778	8.85097	8.85575	8.88173	8.85747	8.50577	8.49798	8.51812	8.67774	8.76965	9.00533	8.95408	8.88011	9.00817	8.8468	8.97242	9.02521	9.05747	9.07977	9.15836	8.93663	9.00718	9.11459	9.08565	9.10156	9.14207	9.01342	8.86733	9.23235	8.98239	8.90482	8.94986	8.24384	8.33708	8.21374	7.72122	7.88354	7.8187	8.43188	8.4005	8.25116	7.8854
Snrpg	8.05723	8.09692	8.16722	8.15981	9.18608	8.68039	8.1923	8.16725	8.4349	8.54239	8.53428	8.53004	8.04729	8.24077	8.06518	8.47566	8.69087	8.92058	8.70524	8.52193	8.87556	8.77139	9.00369	8.77399	8.92606	8.80582	8.91786	8.99577	8.76322	9.02498	8.99431	8.80658	9.03304	9.02861	8.7789	9.12573	8.87701	8.83579	8.80312	8.07313	8.15586	8.05899	7.61531	7.69103	7.67721	8.47359	8.30273	8.26238	8.01422
Snrpn	2.56111	2.40555	2.51475	2.31688	0.917431	2.25848	2.95554	2.91317	3.07168	2.21225	2.05401	2.37188	2.92589	3.02835	2.9373	1.82578	2.15688	2.20371	2.4636	2.6321	2.47375	2.04396	1.92608	1.99957	2.5464	2.54993	2.84505	2.03468	1.9964	2.11581	2.7371	2.53725	2.42172	2.27405	2.14241	2.17319	2.88629	2.66231	2.43104	2.69641	2.52732	2.90743	2.11926	1.96092	1.44939	2.70843	2.04305	2.50604	1.82636
Snrpn.1	5.57857	5.7291	5.71972	5.35149	5.37254	5.3309	5.83848	5.82263	5.72749	5.2445	5.24388	5.20875	5.59001	5.64065	5.69683	5.31283	5.17633	5.24379	5.17878	5.13143	5.26266	4.52045	4.52047	4.53698	5.16202	5.05129	5.13632	4.3904	4.36126	4.38675	5.12239	5.13232	5.1359	4.71883	4.55753	4.56249	5.43238	5.35119	5.36686	5.04395	5.12202	5.08483	4.25787	4.222	4.43942	4.69844	4.78004	4.90683	3.92314
Srrm4	2.6765	2.68346	2.58391	0.286184	0.276289	0.286123	0.0925635	0.113687	0.0263865	0.164654	0.103252	0.0509655	0.159128	0.20501	0.163473	0.472733	0.609469	0.332228	0.294234	0.340218	0.209234	0.103825	0.106074	0.144441	0.285595	0.145508	0.153419	0.031108	0.0232842	0.0601062	0.194391	0.189088	0.146823	0.13258	0.0635801	0.0408581	3.30886	3.35726	3.26548	0.175339	0.178456	0.169639	0.319808	0.381407	0.294788	0.260116	0.286716	0.329006	0.0278139
U2af1	5.16905	5.1268	5.25332	5.44488	6.22744	5.52437	5.05878	5.08535	5.15284	5.47361	5.57983	5.66875	5.10998	5.03672	4.91965	5.25296	5.57732	5.6658	4.88003	4.71689	4.73142	5.07886	5.20312	5.05746	4.97763	4.98904	4.94727	5.17546	5.11485	5.25811	5.00543	4.90744	4.934	5.11512	5.07432	5.27872	4.96875	4.99105	4.91686	4.8432	5.00082	4.95118	4.77052	5.0157	4.88285	4.96578	4.932	4.95087	4.99698
Uhmk1	4.73676	4.82287	4.84668	4.59498	4.1639	4.64154	4.88877	5.00418	5.07682	4.47861	4.48158	4.4799	4.77014	4.7666	4.768	4.47959	4.57931	4.62491	5.11097	5.17005	5.03546	4.34709	4.27332	4.09842	5.00402	5.01285	5.00495	4.34056	4.28851	4.23639	4.99331	4.96121	4.89487	4.11912	4.40164	4.10581	5.12771	5.14401	5.07393	4.63521	4.52241	4.41195	3.78847	3.68207	3.60223	4.47338	4.4755	4.39569	3.72584
Zcchc24	0.638728	0.729485	0.870908	5.42513	5.05477	5.47645	0.593264	0.519528	0.722404	4.87696	4.82493	4.83729	0.663374	0.757192	0.782076	5.27043	5.17552	5.22719	0.617049	0.664855	0.542886	5.96148	5.92131	5.78374	0.858433	1.27238	1.29967	5.96929	5.82453	5.76493	0.919416	1.0883	0.859227	5.86918	5.89173	5.69337	1.83789	2.10743	1.25351	0.991572	0.949042	1.01962	6.11396	6.03448	6.08865	1.07924	1.10176	0.884317	6.26403
[truncated: 20 more columns]
